# Supplementary material
Source: HighWire-hosted journal article supplement (doi:10.1101/rna.078774.121)
Supplement: Supplemental_Table_S3.xlsx [file Supplemental_Table_S3.xlsx]

## Sheet: SR
ORF name	Genename	logFC A6863	logFC A18345	logFC A18349		ORF name	Gene name	logFC A13628	logFC A18346	logFC A18347
YAL065C		0.913608	0.429611	0.145819		YAL065C		0.673554	0.031442	0.369675
YAL064C-A		-0.0016672	0.217329	0.547341		YAL064C-A		-0.228121	-0.153262	-0.96696
YAL063C	FLO9	0.933644	1.64552	0.588214		YAL063C	FLO9	0.427494	0.148266	0.220531
YAL062W	GDH3	1.24991	0.982164	0.111779		YAL062W	GDH3	0.0486023	0.603146	-0.277435
YAL061W		2.73299	1.76616	-0.475439		YAL061W		0.12605	0.681074	0.383269
YAL060W	BDH1	1.42681	0.543885	-0.427272		YAL060W	BDH1	-0.30358	-0.0469198	0.378085
YAL059W	ECM1	0.328673	-0.079651	-0.119634		YAL059W	ECM1	-0.142963	0.135292	-0.161255
YAL058W	CNE1	0.0955652	0.169639	-0.389947		YAL058W	CNE1	-0.160394	0.212445	-0.332292
YAL053W		0.671286	0.454432	-0.361534		YAL054C	ACS1
YAL051W	OAF1	0.789403	0.769404	0.18417		YAL053W		-0.13858	0.404977	-0.420653
YAL049C		1.097	0.908776	0.3832		YAL051W	OAF1	0.233564	0.492114	-0.0459008
YAL048C		1.46228	1.0309	-0.0472807		YAL049C		0.348732	0.769841	0.106167
YAL042W	ERV46	0.905138	0.254679	-0.365584		YAL048C		0.76399	0.587417	0.419698
YAL040C	CLN3	1.10042	1.00011	0.743884		YAL047C	SPC72	-0.226552	0.819791	-0.784611
YAL039C	CYC3	0.794428	0.719704	0.252412		YAL044C	GCV3	0.0347307	0.213873	-0.773185
YAL038W	CDC19	0.580124	0.289216	-0.0440588		YAL043C	PTA1	-2.05746	-1.57938	0.884751
YAL037W		2.04778	1.59809	-1.72488		YAL042W	ERV46	0.154596	0.0751078	0.203378
YAL036C	FUN11	1.00024	0.268603	-0.0631346		YAL041W	CDC24		1.89306
YAL035W	FUN12	0.905494	0.02685	-0.209013		YAL040C	CLN3	-0.413988	0.397786	-0.249666
YAL034W-A	MTW1	1.18123	-0.127581	-0.15055		YAL039C	CYC3	0.544024	0.84101	0.224251
YAL033W	POP5	0.781803	0.24318	-0.843328		YAL038W	CDC19	-0.0829853	-0.0614509	-0.396041
YAL032C	PRP45	1.26242	1.46716	0.443852		YAL037W		0.145727		0.211097
YAL031C	FUN21	0.744825	0.347694	0.276467		YAL036C	FUN11	-0.318058	0.273596	-0.0720092
YAL029C	MYO4	-1.57736	1.41231	0.620986		YAL035W	FUN12	-0.477486	0.204798	-0.119106
YAL028W	FRT2	0.353833	-0.824153	-1.36823		YAL034W-A	MTW1	0.0651451	0.593966	-0.375295
YAL027W		0.759368	0.798777	0.499536		YAL033W	POP5	0.344601	0.394313	-0.152366
YAL025C	MAK16	0.572502	0.0244587	-0.00141807		YAL032C	PRP45	1.47712	1.70044	1.74962
YAL024C	LTE1	0.67448	1.3967	1.29574		YAL031C	FUN21	0.473912	-0.155234	0.19781
YAL023C	PMT2	0.563996	-0.0408232	-0.606923		YAL029C	MYO4	-0.268908	0.473673	-0.190317
YAL022C	FUN26	0.326481	0.611357	0.109916		YAL028W	FRT2	0.195462	0.0311451	0.0178032
YAL020C	ATS1	1.44402	0.505953	0.353818		YAL027W		0.0744135	0.495943	0.723715
YAL019W	FUN30	0.530909	1.06964	0.429228		YAL025C	MAK16	-0.301991	0.151274	-0.461321
YAL017W	FUN31	1.76039	1.69101	1.07214		YAL024C	LTE1	0.110275	0.244334	-0.0747505
YAL016W	TPD3	1.0068	0.499117	-0.441299		YAL023C	PMT2	0.497631	0.050007	0.159256
YAL015C	NTG1	0.505438	0.544883	-0.236462		YAL022C	FUN26	-0.256257	0.0287441	-0.319078
YAL014C	SYN8	1.58103	1.11844	0.289305		YAL021C	CCR4	1.12076	1.49195	1.71582
YAL013W	DEP1	0.871775	0.618018	0.154876		YAL020C	ATS1	0.509597	0.211724	0.248183
YAL012W	CYS3	0.0963469	0.0834117	-0.598881		YAL019W	FUN30	0.204988	0.414235	0.108427
YAL011W	SWC1	0.483137	0.211099	-0.31347		YAL017W	FUN31	-0.316476	0.665916	-0.158479
YAL009W	SPO7	0.800605	0.80506	0.209517		YAL016W	TPD3	0.233809	0.372291	0.00706541
YAL007C	ERP2	0.490587	0.0472297	-1.48319		YAL015C	NTG1	-0.450698	0.719585	0.430776
YAL005C	SSA1	0.551436	0.891592	-0.0239642		YAL014C	SYN8	-0.146104	1.55296	0.723856
YAL003W	EFB1	1.33835	0.716899	0.565853		YAL013W	DEP1	0.155752	0.255373	0.49914
YAL002W	VPS8	0.803186	1.32181	1.19652		YAL012W	CYS3	-0.567232	0.737689	-0.649824
YAL001C	TFC3	0.860866	1.06538	0.368127		YAL011W	SWC1	0.335064	0.0796637	0.232539
YAR002C-A	ERP1	-0.0273531	-0.120467	-0.231212		YAL009W	SPO7	0.112702	0.269655	0.22744
YAR003W	SWD1	0.852713	0.405535	0.0105999		YAL007C	ERP2	-0.436391	0.156939	-0.499814
YAR007C	RFA1	0.273099	1.37115	-2.83078		YAL005C	SSA1	-0.401525	0.180175	0.447743
YAR008W	SEN34	0.0167625	0.629353	0.349789		YAL004W		-0.714274	-0.556884	-1.14427
YAR009C						YAL003W	EFB1	0.244805	0.482645	-0.0783212
YAR010C			-1.6285			YAL002W	VPS8	-0.249887	0.294276	-0.00881176
YAR015W	ADE1	-4.23821		-0.720493		YAL001C	TFC3	0.127333	0.189511	-0.0817841
YAR019C	CDC15	1.07004	1.6095	0.927571		YAR002C-A	ERP1	0.350849	0.30191	-0.0452776
YAR023C		0.424373	0.152551	-0.573515		YAR003W	SWD1	0.0610291	-0.0714813	0.0783907
YAR027W	UIP3	1.41207	1.40844	0.44608		YAR007C	RFA1	-0.207865	-0.308108	-1.38161
YAR028W		1.96774	1.51633	0.184636		YAR008W	SEN34	-0.206864	0.48629	0.542247
YAR029W	FUN57	0.114155	0.25379	0.00989737		YAR009C
YAR031W	PRM9	0.720213	0.918015	1.02061		YAR010C		0.502565	0.735203	0.470555
YAR033W	MST28	0.371446	0.276241	-0.243384		YAR015W	ADE1	0.444931	-1.96972	-0.408207
YAR035W	YAT1	1.30294		0.624743		YAR019C	CDC15	0.354612	0.803556	-0.217435
YAR042W	SWH1	1.0432	0.302032	0.258774		YAR023C		-0.355366	0.0578595	-0.821146
YAR044W	OSH1	1.33928	0.851971	0.139836		YAR027W	UIP3	-0.268151	0.460288	-0.139359
YAR050W	FLO1	0.252598	1.32136	0.712777		YAR028W		-0.16752	-0.26044	0.418893
YAR060C		1.67968	0.860449	0.538765		YAR029W	FUN57	-0.287447	0.664906	0.118008
YAR062W		1.09219	0.221633	-1.06165		YAR031W	PRM9	-0.118756	0.355825	0.118292
YAR064W		1.41927	0.477228	0.165832		YAR033W	MST28	-0.293771	-0.0473011	0.156648
YAR068W		1.31636	0.640105	-0.340512		YAR042W	SWH1	1.07706	-0.550436	0.1516
YAR069C		-0.814137	0.220772	0.0679732		YAR044W	OSH1	0.606646	0.318378	-0.137414
YAR071W	PHO11	-0.487437	-0.361308	-0.884052		YAR050W	FLO1	0.901284	0.245097	0.70337
YAR073W	IMD1	0.393017	0.522675	-0.386347		YAR053W		-0.248565	-0.0604186	-0.194982
YBL106C	SRO77	-0.493179	-0.606315	-0.114582		YAR060C		0.386392	-0.333148	-0.246099
YBL105C	PKC1	0.145765	0.299911	0.566031		YAR062W		1.31755	-0.352977	0.449674
YBL104C		-0.548385	-1.19186	-0.831915		YAR064W		0.503766	0.161166	0.411261
YBL103C	RTG3	-0.0147367	0.0263601	-0.0552004		YAR068W		0.352186	-0.85475	-1.03713
YBL102W	SFT2	-0.160902	0.381996	0.0971594		YAR069C		0.109187	-0.404511	0.210078
YBL101C	ECM21	0.224199	0.226188	0.0158822		YAR070C		2.14664	-0.344692	0.0254315
YBL100C		0.902329	-0.529109	-0.725949		YAR071W	PHO11	-1.23659	-0.0514481	-1.08705
YBL099W	ATP1	0.722961	0.305118	-0.167041		YAR073W	IMD1	0.191717	-0.116423	0.58338
YBL098W	BNA4	-0.519585	-0.770196	-0.924406		YBL106C	SRO77	0.126431	0.0992706	0.184801
YBL096C		-0.423609	-1.3056	-1.50349		YBL105C	PKC1	0.0884348	0.200251	-0.0989778
YBL095W		0.419825	-0.0322345	0.225317		YBL104C		0.490192	0.636148	-0.241153
YBL093C	ROX3	0.564771	0.317329	0.213546		YBL103C	RTG3	0.0103333	0.121982	0.191024
YBL092W	RPL32	0.377291	-0.221432	-0.0990286		YBL102W	SFT2	-0.333287	-0.343333	0.000671365
YBL091C	MAP2	0.141375	0.232287	0.395813		YBL101C	ECM21	-0.093736	0.579978	0.252808
YBL090W	MRP21	-0.231089	0.173652	-0.287894		YBL100C		-0.290931	-0.586916	-0.15182
YBL087C	RPL23A	0.739117	-0.285722	0.224456		YBL099W	ATP1	-0.050849	0.292424	-0.387169
YBL086C		-0.660965	-0.163528	-0.523174		YBL098W	BNA4	-0.261817	-0.116768	-0.0210874
YBL085W	BOI1	-0.117217	0.095946	0.178092		YBL096C		-0.303301	-0.860485	-0.663603
YBL083C		-0.447217	-0.558716	-0.354377		YBL095W		0.247603	-0.208538	-0.00640686
YBL082C	RHK1	0.632994	0.399854	-0.0849742		YBL093C	ROX3	0.378853	-0.165795	-0.125291
YBL081W		-0.112854	-0.572664	-0.419285		YBL092W	RPL32	-0.624537	-0.115515	-0.699015
YBL080C	PET112	0.0102329	-0.325315	-0.296473		YBL091C	MAP2	-0.0346361	0.0908364	0.256825
YBL079W	NUP170	0.597169	0.741893	1.05568		YBL090W	MRP21	0.263737	0.51564	0.43133
YBL077W		0.681117	0.116904	-0.639489		YBL087C	RPL23A	0.0174656	0.487637	-0.0542976
YBL076C	ILS1	0.232737	-0.00277643	-0.357956		YBL086C		-0.00988362	0.518512	0.295837
YBL074C	AAR2	-0.0455889	0.268621	-0.166475		YBL085W	BOI1	-0.205228	0.299415	-0.097326
YBL073W		0.853266	0.670037	-0.0969949		YBL083C		0.409417	0.605828	0.271631
YBL069W	AST1	2.03856	1.20401	1.1447		YBL082C	RHK1	0.340819	0.0145678	0.110309
YBL068W	PRS4	0.543036	0.297772	0.445195		YBL081W		-0.122092	0.00238175	-0.0932693
YBL067C	UBP13	0.24788	0.235625	-0.0271914		YBL080C	PET112	0.293042	0.140126	0.0409718
YBL066C	SEF1	0.289784	0.448533	0.491686		YBL079W	NUP170	0.164086	0.595812	0.122874
YBL065W		-1.01432	0.504769	-0.230336		YBL077W		-0.737582	-0.0132601	-0.955894
YBL064C	PRX1	0.158794	0.578242	-0.273513		YBL076C	ILS1	-0.254541	0.0541695	-0.556873
YBL063W	KIP1	0.157097	0.553293	0.155396		YBL074C	AAR2	0.338378	-0.0381283	0.416207
YBL062W		-0.901034	-0.0589718	-0.777996		YBL073W		-0.238345	-1.28755	-0.690742
YBL059W		-0.321322	0.679755	-0.326268		YBL072C	RPS8A	-0.945687	0.570806	-1.96053
YBL058W	SHP1	0.275434	0.206539	0.140136		YBL069W	AST1	0.740031	-0.223182	0.476836
YBL057C	PTH2	-0.205994	0.64437	-0.390603		YBL068W	PRS4	0.0677349	0.364086	-0.0511511
YBL056W	PTC3	-0.344507	-0.402152	-0.536165		YBL067C	UBP13	0.121602	0.102765	-0.101796
YBL055C		0.0803332	0.124867	-0.179915		YBL066C	SEF1	0.0660636	0.0947855	0.136687
YBL053W		0.367562	-0.248892	-1.10519		YBL065W		0.700938	0.264952	0.713239
YBL052C	SAS3	-0.588937	-1.44802	-2.32462		YBL064C	PRX1	1.00556	0.326542	0.470044
YBL051C	PIN4	-0.402721	-0.305816	-0.274754		YBL063W	KIP1	0.349147	-0.0863604	0.0144132
YBL050W	SEC17	0.216524	0.626745	0.0221942		YBL062W		-0.173818	0.126295	-0.480758
YBL049W	MOH1	0.384047	0.939279	0.177253		YBL059W		-0.202078	0.481321	0.615099
YBL046W		-0.122259	-0.107612	-0.221118		YBL058W	SHP1	0.0194269	-0.0156319	0.198424
YBL045C	COR1	0.507821	0.0530852	-0.306109		YBL057C	PTH2	0.0350124	0.466064	-0.186815
YBL043W	ECM13	1.71831	0.429586	0.673961		YBL056W	PTC3	0.100625	0.0600768	-0.034529
YBL042C	FUI1	0.195978	-0.491869	-0.0412792		YBL055C		0.139685	-0.0538249	0.0347855
YBL041W	PRE7	0.133957	-0.38631	0.115457		YBL053W		-0.312099	-0.58409	-0.452486
YBL040C	ERD2	-0.162819	-0.194074	-0.196015		YBL052C	SAS3	-0.512088	-0.593452	-0.678625
YBL039C	URA7	-2.51825		-2.98281		YBL051C	PIN4	-0.398095	-0.255322	-0.572739
YBL037W	APL3	0.101517	-0.104565	-0.17045		YBL050W	SEC17	0.0588451	0.270124	0.10964
YBL036C		0.084081	0.369313	0.239222		YBL049W	MOH1	0.395145	0.633229	0.0698376
YBL035C	POL12	0.103459	-0.818539	-0.705528		YBL048W		1.36983	0.531889	0.653336
YBL034C	STU1	-0.463914	-0.166189	-0.251351		YBL046W		-0.019893	0.0888288	0.131722
YBL033C	RIB1	0.454438	0.312369	0.195659		YBL045C	COR1	0.181647	0.216584	-0.390287
YBL032W		-1.63751	-0.0721867	0.474927		YBL043W	ECM13	0.774596	-0.13484	-0.119184
YBL031W	SHE1	0.618107	0.257179	0.328072		YBL042C	FUI1	0.477572	-0.012205	-0.646627
YBL030C	PET9	-0.103545	-0.197501	-1.9537		YBL041W	PRE7	0.0926978	0.0505247	0.0926386
YBL027W	RPL19B	0.229352	-0.31119	0.263735		YBL040C	ERD2	0.252198	0.00147814	-0.249801
YBL026W	LSM2	-1.41623	-1.06566	-2.2895		YBL039C	URA7	-3.5219	-1.35574	-0.583629
YBL025W	RRN10	-0.67895	-0.736826	-1.04986		YBL037W	APL3	0.10457	-0.0783132	-0.767235
YBL024W	NCL1	0.312018	-0.51896	-0.878609		YBL036C		0.146033	0.0958882	0.0858144
YBL023C	MCM2	-0.510276	-1.21249	-0.167131		YBL035C	POL12	0.890456	-0.180647	-0.209555
YBL022C	PIM1	0.356001	-4.82835			YBL034C	STU1	-0.135824	0.148753	-0.306936
YBL021C	HAP3	0.046425	-0.556546	-0.706657		YBL033C	RIB1	0.529071	0.39224	0.740142
YBL020W	RFT1	0.523467	0.31166	-0.602409		YBL032W		-0.534037	0.556348	-0.713291
YBL019W	APN2	0.148868	0.0418159	-0.277503		YBL031W	SHE1	0.41035	0.557564	0.344103
YBL018C	POP8	0.0631833	0.233005	-1.40225		YBL030C	PET9	-0.309977	0.581836	-0.485793
YBL016W	FUS3	2.09602	1.03914	0.726025		YBL029W		0.436501	0.817683	0.330086
YBL015W	ACH1	0.956909	0.0666011	-0.0495377		YBL028C		-0.0607848	-0.513255	-0.634029
YBL012C		-0.0140203	-0.0518628	-0.403578		YBL027W	RPL19B	-0.860174	0.445269	-0.62749
YBL010C		-0.146026	-0.466736	-0.640343		YBL026W	LSM2	0.296193	0.195235	-0.0754985
YBL002W	HTB2	0.295269	-0.221797	-0.768024		YBL025W	RRN10	0.0612916	-0.656338	-0.400462
YBL001C	ECM15	-0.255255	-0.678775	-0.51431		YBL024W	NCL1	0.0812095	-0.167178	-0.487108
YBR001C	NTH2	-0.830304	0.908145	-1.99631		YBL023C	MCM2	0.206404	-0.423569	-0.336547
YBR003W	COQ1	-0.186077	0.430345	-0.0532915		YBL022C	PIM1	0.205707	0.696615	0.415103
YBR004C		-0.174063	0.320013	-0.3945		YBL021C	HAP3	0.424697	0.0809551	0.355375
YBR005W		0.0182621	0.871243	0.921911		YBL020W	RFT1	-0.384064	0.381893	-0.843867
YBR006W	UGA2	0.7309	0.620914	-0.177709		YBL019W	APN2	0.279785	0.066467	0.138969
YBR008C	FLR1	0.380222	-0.930726	-0.173126		YBL018C	POP8	-0.0657602	-0.227328	-0.878261
YBR009C	HHF1	0.272281	-0.438206	-0.358661		YBL016W	FUS3	0.725559	-1.26859	-1.07623
YBR010W	HHT1	0.321966	-0.251359	-0.156386		YBL015W	ACH1	0.797478	0.31834	0.274079
YBR011C	IPP1	0.0400414	0.0544775	-0.371059		YBL013W	FMT1	-0.0915312	0.156681
YBR012C		-0.259003	0.223038	-0.96706		YBL012C		0.259091	0.2654	0.651216
YBR015C	MNN2	0.613444	-1.54394	0.240358		YBL010C		0.139258	0.23061	-0.0644399
YBR016W		-0.335742	-0.778186	-0.176514		YBL007C	SLA1	0.0210622	0.740043	-0.689468
YBR018C	GAL7	2.08695	1.04097	0.964361		YBL002W	HTB2	-0.221743	0.227001	-0.692676
YBR019C	GAL10	0.609742	-0.8502	-0.527788		YBL001C	ECM15	0.447174	-0.163457	-0.10988
YBR021W	FUR4	-0.146126	-0.858333	-0.521794		YBR003W	COQ1	0.0726432	0.0746753	0.43275
YBR022W		-0.177112	-0.292585	-0.0736657		YBR004C		-0.19879	0.400089	-0.388846
YBR023C	CHS3	-0.589829	1.36416	1.60297		YBR005W		-1.9843	-0.133806	-0.724811
YBR024W	SCO2	-0.052635	-0.0789465	-0.325907		YBR006W	UGA2	0.0213633	-0.150644	0.116753
YBR025C		0.907979	0.308394	0.164379		YBR008C	FLR1	-0.451624	0.00267329	-0.23332
YBR026C	ETR1	-0.0468784	0.430798	0.00238649		YBR009C	HHF1	-0.422488	0.309982	-0.61741
YBR028C		-0.228794	-4.01048	-1.14451		YBR010W	HHT1	-0.0280415	0.224338	-0.334217
YBR029C	CDS1	0.0884145	0.0135303	-0.189828		YBR011C	IPP1	0.213566	0.729431	0.12293
YBR030W		-0.548382	-0.634626	-0.317284		YBR012C		-1.08305	0.161108
YBR031W	RPL4A	1.3253	-0.0450773	0.490774		YBR013C		-0.274794	1.35519	0.916724
YBR033W	EDS1	0.225089	-0.570831	-0.277363		YBR015C	MNN2	-0.21728	0.469313	-0.638199
YBR034C	HMT1	0.179537	-0.120619	0.172464		YBR016W		-0.464411	0.150621	-0.753159
YBR035C	PDX3	-0.273179	-0.00547829	-0.18875		YBR018C	GAL7	0.881851	0.0474065	-0.0589692
YBR036C	CSG2	0.324447	0.306845	0.197827		YBR019C	GAL10	-0.405784	-0.345727	-0.743076
YBR037C	SCO1	0.795394	0.621976	0.0216152		YBR020W	GAL1	1.72547		1.3636
YBR039W	ATP3	0.891781	0.280983	0.0907234		YBR021W	FUR4	-0.0153318	-0.423084	-0.303387
YBR041W	FAT1	0.238284	1.11942	0.750604		YBR022W		-0.666237	0.261295	-0.00956004
YBR042C		0.270266	-0.666894	-0.0245362		YBR023C	CHS3	0.347253	0.633715	0.348543
YBR044C	TCM62	-0.0264696	-0.00846995	-0.0061437		YBR024W	SCO2	0.46837	0.431592	-0.0600805
YBR046C	ZTA1	-0.657617	0.236083	-0.213553		YBR025C		0.221483	0.618883	0.348928
YBR048W	RPS11B	0.732198	0.0754622	0.496475		YBR026C	ETR1	0.313069	0.653121	0.861756
YBR049C	REB1	0.241869	-0.77874	-0.74771		YBR028C			-0.274268	-0.270626
YBR050C	REG2	-0.921881	-0.318451	-0.73736		YBR029C	CDS1	0.00319718	0.190443	-0.145912
YBR052C		0.901366	0.662065	0.00964117		YBR030W		-0.0175796	0.0322683	-0.0939024
YBR053C		0.0991982	0.405347	-0.13717		YBR031W	RPL4A	-0.0990951	0.722034	-0.837742
YBR054W	YRO2	2.36776	2.58506	0.0964969		YBR032W		-0.423006	-1.05959	-1.21563
YBR055C	PRP6	0.61089	-1.14507	-0.25628		YBR033W	EDS1	0.375258	-0.387013	0.266219
YBR056W		-0.328109	0.444194	0.341295		YBR034C	HMT1	0.248678	-0.0339947	0.0238089
YBR057C	MUM2	0.288148	0.0736125	-0.0835696		YBR035C	PDX3	-0.158239	-0.0729711	0.107979
YBR058C	UBP14	-2.4691	-0.277332	-1.01299		YBR036C	CSG2	-0.0153303	0.230167	0.318446
YBR058C-A	TSC3	-4.0534	-3.84276	-1.1078		YBR037C	SCO1	0.28785	0.442833	0.515973
YBR060C	ORC2	0.0140628	0.222649	0.0229902		YBR039W	ATP3	0.0344665	0.370774	-0.0991097
YBR061C	TRM7	0.376351	-0.128807	0.11072		YBR041W	FAT1	0.125068	0.141168	0.231126
YBR062C		-0.0417151	0.174455	0.0746828		YBR042C		-0.325595	0.0904757	-0.0875645
YBR063C		1.00572	1.04752	-0.220918		YBR044C	TCM62	-0.0485187	0.0104488	0.109889
YBR065C	ECM2	0.394709	0.235745	1.50307e-05		YBR046C	ZTA1	-0.656679	0.364873	-0.799639
YBR066C	NRG2	0.240219	0.408627	0.0767915		YBR047W
YBR067C	TIP1	-0.908146	-0.0630474	0.000581675		YBR048W	RPS11B	0.142079	0.529588	-0.260838
YBR068C	BAP2	-0.988261	0.648543	0.720781		YBR049C	REB1	-0.1263	-0.281844	-0.548988
YBR069C	TAT1	0.842087	0.053775	0.143317		YBR050C	REG2	-0.5351	-0.0141715	0.269755
YBR071W		0.160667	0.269795	0.243806		YBR052C		0.428683	0.254754	0.267377
YBR072W	HSP26	1.06993	0.966995	0.0997635		YBR053C		-0.439208	-0.143913	-0.0586345
YBR074W		-0.153577	-0.487711	-0.0157113		YBR054W	YRO2	-0.350335	-1.15743	0.0305222
YBR075W		-0.0701423	-0.329085	-0.368916		YBR055C	PRP6	-0.543442	-0.379516	-0.716069
YBR076W	ECM8	-0.528107	0.424013	0.265353		YBR056W		-0.777523	0.30708	0.513853
YBR077C		-0.870307	-0.165734	-0.553006		YBR057C	MUM2	0.259729	-0.0267136	-0.189874
YBR078W	ECM33	-0.477264	0.708637	0.942069		YBR058C	UBP14	-0.981812		3.06029
YBR079C	RPG1	-0.0395643	0.0261114	-0.0549987		YBR058C-A	TSC3	-0.897524	-0.706378	-0.253728
YBR080C	SEC18	-0.386651	-0.355034	-1.85068		YBR060C	ORC2	-0.0493925	-0.0377348	0.0567971
YBR082C	UBC4	-0.0472833	0.298309	0.0881665		YBR061C	TRM7	0.102005	0.0378899	0.131073
YBR083W	TEC1	-0.168055	-0.352175	-0.360717		YBR062C		-0.128561	0.0566301	-0.105809
YBR084C-A	RPL19A	0.172698	-0.322247	0.0159991		YBR063C		-0.255531	-0.00100564	-0.343074
YBR084W	MIS1	0.0167519	-0.0410874	-0.232105		YBR065C	ECM2	0.168979	0.362611	0.0124991
YBR086C	IST2	0.0497679	0.098479	-0.212557		YBR066C	NRG2	0.014214	0.149615	-0.0720425
YBR087W	RFC5	0.354401	0.19345	0.0718452		YBR067C	TIP1	0.0136776	0.189033	0.0228993
YBR090C	NHP6B	-0.408775	-0.306915	-0.395133		YBR068C	BAP2	-0.127397	0.546882	-0.093803
YBR091C	MRS5	-0.315308	-0.680589	0.341144		YBR069C	TAT1	0.301903	-0.48757	-0.809737
YBR092C	PHO3	-0.326209	0.609633	0.645362		YBR070C	SAT2	-0.0825742	0.169523	-0.312112
YBR093C	PHO5	-0.678857	-0.73469	-0.80682		YBR071W		-0.445515	0.301561	-0.436962
YBR094W		-3.66798	-1.81798	-2.80684		YBR072W	HSP26	0.253315	0.215969	-0.500712
YBR095C	RXT2	-0.163197	-0.358531	-0.0971978		YBR074W		0.0670636	-0.163478	-0.108372
YBR100W		-0.625775	-2.22945	-0.766053		YBR075W		-0.447642	-0.00843704	-0.35149
YBR101C	FES1	-0.586696	0.380299	-0.106347		YBR076W	ECM8	0.332	1.05734	0.416635
YBR103W	SIF2	0.244605	-0.241063	-0.381879		YBR077C		0.111529	0.0676589	0.185427
YBR104W	YMC2	1.00725	0.733211	0.0526858		YBR078W	ECM33	0.0552176	0.304624	0.00651968
YBR105C	VID24	1.55747	0.714912	0.516225		YBR079C	RPG1	-0.263741	0.0077633	-0.203611
YBR106W	PHO88	0.380628	-0.218095	-0.20263		YBR080C	SEC18	-1.36264	-0.629604	-0.78277
YBR107C	IML3	0.0132413	0.140903	-0.364729		YBR082C	UBC4	-0.21094	0.220535	0.189119
YBR109C	CMD1	-0.863798	-0.179503	-1.03884		YBR083W	TEC1	-0.372457	-0.308839	-0.396732
YBR110W	ALG1	-0.0640234	0.0938874	0.00416535		YBR084C-A	RPL19A	-0.135734	0.137883	-0.156668
YBR111C	YSA1	0.256309	0.0474414	-0.394376		YBR084W	MIS1	-0.142413	-0.01201	-0.360365
YBR111W-A	SUS1	-0.25888	-0.224535	0.0581193		YBR086C	IST2	-0.162776	-0.0452646	-0.365687
YBR112C	CYC8	0.0655915	-0.118284	-0.282735		YBR087W	RFC5	0.0130927	0.342756	0.237558
YBR114W	RAD16	1.00776	1.07974	0.966119		YBR089W		-0.144207	0.188848	-1.74132
YBR115C	LYS2	0.523158	1.01322	0.936447		YBR090C	NHP6B	-0.110808	-0.316854	0.0498954
YBR116C		-0.158856	-0.200564	0.00246747		YBR091C	MRS5	-0.0255428	0.204936	0.104958
YBR117C	TKL2	-0.717913	-2.48724			YBR092C	PHO3	-0.704609	-0.191433	-0.856177
YBR118W	TEF2	0.110592	-0.541872	-0.262743		YBR093C	PHO5	-0.509672	-0.24833	-0.314384
YBR119W	MUD1	0.0388882	0.118043	-0.00074458		YBR094W		-2.36767	-2.5935	-0.831472
YBR120C	CBP6	-0.403566	0.197611	-0.235016		YBR095C	RXT2	0.570724	0.209171	0.435837
YBR121C	GRS1	0.287848	-0.391109	-0.911196		YBR096W		-0.83958	-0.842762	-0.466311
YBR122C	MRPL36	0.0561624	-0.0639663	-0.406574		YBR099C		-1.64902	-1.24172	1.19687
YBR123C	TFC1	-0.355666	-0.862397	-0.922985		YBR100W		-0.0392754	-0.404029	-0.175204
YBR124W		0.188897	-0.0748884	-0.241958		YBR101C	FES1	-0.494968	-0.0268113	0.943955
YBR125C	PTC4	0.335569	0.512358	-0.218612		YBR103W	SIF2	-0.0580439	0.047936	-0.355876
YBR126C	TPS1	-0.0328358	0.505408	-0.182315		YBR104W	YMC2	-0.0810428	0.211237	-0.355778
YBR127C	VMA2	0.551905	0.104435	-0.382502		YBR105C	VID24	0.852267	-0.201462	0.377932
YBR128C	APG14	0.353651	0.299985	-0.155143		YBR106W	PHO88	-0.450328	0.0394864	-1.05324
YBR129C	OPY1	0.489683	0.330624	0.531541		YBR107C	IML3	0.488399	0.10087	0.312444
YBR130C	SHE3	-0.677515	-0.0349019	-0.112345		YBR109C	CMD1	-0.481679	0.268239	-0.4367
YBR131W	CCZ1	0.410838	-0.915851	-0.59695		YBR110W	ALG1	-0.0571968	0.251341	-0.0476113
YBR132C	AGP2	0.114153	0.243902	-0.339748		YBR111C	YSA1	0.092319	-0.311795	0.469536
YBR133C	HSL7	-0.16237	-0.0461402			YBR111W-A	SUS1	-0.308941	-0.0469374	-0.635648
YBR134W		-0.558934	-0.0684498	-1.61661		YBR112C	CYC8	-0.246641	-0.00564721	-0.182476
YBR135W	CKS1	0.501253	0.503974	-0.125084		YBR114W	RAD16	0.146788	-0.0240253	-0.276961
YBR139W		-1.68473	0.340715	-0.325539		YBR115C	LYS2	-0.476981	0.307435	-0.134697
YBR141C		0.856424	0.721501	0.39831		YBR116C		0.337163	0.238725	0.204506
YBR143C	SUP45	0.198241	-0.591539	-0.317902		YBR117C	TKL2	-0.692062	-1.86008	-1.0005
YBR144C		-0.176917	-0.301802	-0.176294		YBR118W	TEF2	-0.339731	0.151258	-0.666382
YBR145W	ADH5	0.539782	0.990768	-0.0443605		YBR119W	MUD1	-0.340225	0.139621	-0.030105
YBR146W	MRPS9	-0.112173	0.0236434	-0.369922		YBR120C	CBP6	-0.0691558	0.236645	0.143451
YBR147W		0.628659	0.958135	0.103675		YBR121C	GRS1	-0.148591	-0.221999	-0.942589
YBR149W	ARA1	0.24082	0.395838	-0.00386635		YBR122C	MRPL36	0.432328	0.662069	0.273757
YBR150C	TBS1	-0.280134	-0.0616306	-0.378249		YBR123C	TFC1	-0.068348	-0.280425	-0.446712
YBR151W	APD1	-0.298729	0.223648	-0.109734		YBR124W		-0.24231	1.51448	-0.132415
YBR152W	SPP381	-0.0931658	0.0180538	-0.00881598		YBR125C	PTC4	0.480767	0.501036	0.283902
YBR153W	RIB7	0.405655	-0.0196056	0.548032		YBR126C	TPS1	-0.737561	0.0470755	0.731811
YBR154C	RPB5	0.0494608	0.0624879	-4.27434		YBR127C	VMA2	0.106536	-0.101976	-0.0816351
YBR155W	CNS1	-0.0310615	-0.627695	0.381816		YBR128C	APG14	0.55314	0.440314	0.544203
YBR156C	SLI15	0.230345	-0.415138	-0.333962		YBR129C	OPY1	0.338912	0.258012	0.0279054
YBR157C	ICS2	3.35515	0.536764	-0.136447		YBR130C	SHE3	0.104738	0.00215666	0.198861
YBR158W	AMN1	1.89498	0.236634	-0.472934		YBR131W	CCZ1	0.910324	0.693669	-0.145398
YBR159W		0.896398	0.603126	0.330328		YBR132C	AGP2	-0.160778	0.115198	-0.242341
YBR160W	CDC28	-0.0335181	-0.536778	-0.860892		YBR133C	HSL7	0.857365	-0.64153	-0.21006
YBR161W		0.656297	0.186894	0.196551		YBR134W		0.709489	0.220858	0.299441
YBR162C	TOS1	0.291085	-0.158638	-0.420029		YBR135W	CKS1	0.413152	0.158582	-0.364349
YBR162W-A	YSY6	0.226731	0.457464	-0.670635		YBR139W		0.382993	0.348161	0.410588
YBR163W	DEM1	-0.159965	1.0284	0.573182		YBR141C		0.779342	0.488831	0.210727
YBR164C	ARL1	-0.42588	-0.216922	-0.626558		YBR142W	MAK5	0.400477	-0.314528	-2.86203
YBR165W	UBS1	0.194863	0.308962	-0.162006		YBR143C	SUP45	-0.358083	0.0288051	-0.842292
YBR166C	TYR1	0.0980972	0.227719	-0.42471		YBR144C		-0.275021	-0.139771	0.166929
YBR167C	POP7	-0.480338	-0.769436	-0.673539		YBR145W	ADH5	0.721704	0.95168	0.826131
YBR169C	SSE2	0.0411585	0.442533	-0.609512		YBR146W	MRPS9	-0.205737	0.104231	0.0594109
YBR170C	NPL4	-0.0681278	-0.0471758	-0.261284		YBR147W		0.598013	1.1762	0.257575
YBR172C	SMY2	0.0236919	-0.463868	0.0337875		YBR149W	ARA1	-0.103331	0.203423	0.0487608
YBR173C	UMP1	-0.0183088	-0.230187	0.0486098		YBR150C	TBS1	0.181444	-0.0180061	-0.153846
YBR175W	SWD3	0.405566	-0.0954343	-0.193722		YBR151W	APD1	-0.245961	0.232408	0.182938
YBR176W	ECM31	0.296967	0.496498	-0.0908943		YBR152W	SPP381	0.451181	0.101793	0.20762
YBR177C	EHT1	0.359548	0.485835	-0.43874		YBR153W	RIB7	0.145116	-0.0166885	0.109894
YBR178W		0.958733	-0.0597319	-0.718373		YBR154C	RPB5	-0.445706	-0.244674	-0.717059
YBR180W	DRT1	-0.320475	-0.230666	0.199708		YBR155W	CNS1	-0.268101	0.00606439	0.122924
YBR181C	RPS6B	0.456772	-0.0992289	0.229374		YBR156C	SLI15	0.26214	0.256763	0.0806609
YBR182C	SMP1	-0.647308	0.263184	0.493907		YBR157C	ICS2	0.35908	-1.3465	-1.4933
YBR183W	YPC1	1.89512	1.15917	0.0414291		YBR158W	AMN1	-0.0142507	-1.13463	-1.49122
YBR185C	MBA1	0.147948	-0.129118	-0.271284		YBR159W		0.222209	0.493964	0.146069
YBR186W	PCH2	0.869102	1.31528	1.13718		YBR160W	CDC28	-0.00216934	0.137515	-0.550903
YBR187W		0.631749	0.0228886	0.0750567		YBR161W		0.230234	0.183272	0.214431
YBR188C	NTC20	-0.785873	-0.781055	-0.985738		YBR162C	TOS1	-0.0808846	-0.00165971	-0.95072
YBR189W	RPS9B	0.812623	0.0751795	0.513952		YBR162W-A	YSY6	-0.535611	-0.413384	-0.548956
YBR190W		-0.332613	-1.43825	-0.369279		YBR163W	DEM1	-0.375819	0.173835	0.269395
YBR191W	RPL21A	0.255527	-0.379132	0.0235168		YBR164C	ARL1	-0.112469	0.144077	-0.215685
YBR192W	RIM2	0.282728	-0.00791171	-0.714557		YBR165W	UBS1	0.447581	0.30688	0.0671588
YBR193C	MED8	-0.579988	-0.456342	-0.468878		YBR166C	TYR1	-0.00901089	-0.130549	-0.330198
YBR194W	SOY1	-0.259039	-0.32949	-1.48558		YBR167C	POP7	-0.13938	0.074545	-0.105206
YBR195C	MSI1	0.220389	-0.52488	-0.106739		YBR169C	SSE2	-0.503627	-0.706402	0.588369
YBR196C	PGI1	0.481578	0.0380111	-0.273494		YBR170C	NPL4	0.105279	-0.223896	-0.0684539
YBR197C		-0.206666	-0.331345	-0.656281		YBR171W	SEC66		5.75356	4.02298
YBR201W	DER1	-0.438727	-0.293185	-1.36819		YBR172C	SMY2	-0.0280544	-0.347258	-0.0576651
YBR203W	COS111	-1.24912	-1.34293	-0.501418		YBR173C	UMP1	-0.34172	0.0463169	-0.22368
YBR204C		0.00346237	0.0732133	0.152062		YBR175W	SWD3	0.235118	0.203153	-0.0730904
YBR205W	KTR3	0.568507	0.331723	0.50999		YBR176W	ECM31	-0.0224164	0.380519	0.411896
YBR207W	FTH1	0.0267974	0.107773	-0.149924		YBR177C	EHT1	-0.938601	0.403743	-0.280009
YBR208C	DUR1,2	-0.394569	1.35092	-2.56959		YBR178W		0.166449	0.47285	-0.299864
YBR211C	AME1	0.25633	0.386089	0.113716		YBR180W	DRT1	-0.127306	0.486658	-0.447447
YBR212W	NGR1	-1.02547	-0.367413	-2.01318		YBR181C	RPS6B	-0.369633	0.072565	-0.365515
YBR213W	MET8	-0.602442	-0.423596	-0.491776		YBR182C	SMP1	-0.347657	0.68373	-0.0746235
YBR214W	SDS24	-0.0771209	0.0126228	-0.335032		YBR183W	YPC1	0.0284204	0.477274	0.221098
YBR217W	APG12	1.00992	0.875493	1.0104		YBR185C	MBA1	0.374118	0.472368	0.353808
YBR219C		0.291663	-0.214695	0.10325		YBR186W	PCH2	0.373042	1.15734	0.362784
YBR220C		-0.750763	-0.883901	-0.61096		YBR187W		0.53292	0.222698	0.0879622
YBR221C	PDB1	1.03495	0.815291	0.672853		YBR188C	NTC20	0.279202	-0.173594	-0.303693
YBR223C	TDP1	0.0329397	-0.395353	0.699319		YBR189W	RPS9B	0.0350088	0.263625	-0.247237
YBR228W	SLX1	-0.30443	-0.126715	-1.96111		YBR190W		-0.426695	-0.816873	-0.929874
YBR231C	AOR1	-0.210434	0.239117	-0.162838		YBR191W	RPL21A	-0.422016	0.225132	-0.691972
YBR233W-A	DAD3	-0.0669749	-0.416377	0.0355828		YBR192W	RIM2	-0.52892	0.33431	-0.731933
YBR234C	ARC40		1.87471	1.08195		YBR193C	MED8	0.23015	0.310106	0.252695
YBR235W		-0.386285	0.368271	0.0702052		YBR194W	SOY1	-0.554533	-0.275039	-0.579839
YBR236C	ABD1	-0.189409	-0.380385	-0.441509		YBR195C	MSI1	-0.327022	0.0923265	-0.421828
YBR238C		0.655185	-0.208356	-1.11709		YBR196C	PGI1	-0.040946	0.163455	-0.409554
YBR239C		0.37583	0.0229016	-0.526413		YBR197C		0.185104	-0.0152861	-0.0312127
YBR241C		0.304352	-0.128504	-0.132852		YBR200W	BEM1	0.415464	0.982033	0.849601
YBR242W		0.279738	-0.0973973	-0.387871		YBR201W	DER1	-0.0311538	0.0303075	-0.0623172
YBR243C	ALG7	-0.198148	-0.197357	-0.104889		YBR203W	COS111	0.567312	0.230587	0.127632
YBR244W	GPX2	0.783305	0.278338	0.911249		YBR204C		0.644831	0.884441	0.590806
YBR245C	ISW1	-0.878036	-0.0629371	0.126713		YBR205W	KTR3	0.166849	0.337564	0.149737
YBR246W		0.35641	-0.199003	-0.175195		YBR207W	FTH1	0.0113259	0.273945	0.371768
YBR247C	ENP1	0.00608651	-0.494668	-0.107589		YBR208C	DUR1,2	-0.250718	0.952074	-0.514637
YBR248C	HIS7	-0.0170241	-0.357568	-0.184922		YBR210W		-0.405317	0.0258367	-0.259656
YBR249C	ARO4	0.606056	0.154675	-0.0363718		YBR211C	AME1	0.0773069	0.265653	0.0260253
YBR250W		-0.108412	-0.395573	-0.217954		YBR212W	NGR1	-0.125533	-0.0489559	0.110943
YBR251W	MRPS5	0.666903	0.0427279	-0.326797		YBR213W	MET8	0.0510542	0.322304	0.147066
YBR252W	DUT1	0.494488	-0.267919	-0.773715		YBR214W	SDS24	-0.127807	0.287439	-0.365499
YBR253W	SRB6	0.179757	-0.109288	-0.221043		YBR217W	APG12	0.376934	0.775801	0.696064
YBR254C	TRS20	0.5591	0.48099	0.670907		YBR219C		0.193528	0.0859255	0.0160383
YBR255W		-0.528964	-1.03432	-1.04477		YBR220C		-0.200284	-0.189664	0.327505
YBR256C	RIB5	0.320725	0.586237	0.0637334		YBR221C	PDB1	0.342293	0.618767	-0.0153969
YBR257W	POP4	0.158387	0.371244	0.215313		YBR223C	TDP1		1.38368	1.88004
YBR258C	SHG1	-0.474553	-0.16497	-0.753827		YBR227C	MCX1		1.406	-1.07914
YBR260C	RGD1	0.495707	0.287518	0.258381		YBR228W	SLX1	-0.865592	1.17532	0.279084
YBR261C		-0.00389161	-0.5216	-0.504694		YBR231C	AOR1	0.493069	0.198541	0.290015
YBR262C		-0.19059	-0.569568	-0.185076		YBR233W-A	DAD3	-0.212553	0.19355	-0.570619
YBR263W	SHM1	-0.18676	-0.0947556	-1.03107		YBR234C	ARC40	-0.424047	0.217117	0.00471098
YBR264C	YPT10	-0.0954413	-0.0379681	-0.512502		YBR235W		-0.0172192	0.207666	-0.180377
YBR265W	TSC10	0.184719	-0.255885	-0.365019		YBR236C	ABD1	0.184173	0.074917	0.0125066
YBR266C		-0.101102	-0.702315	-0.668883		YBR238C		1.15377	-0.187527	-0.474557
YBR267W		0.871009	-0.209137	0.193915		YBR239C		-0.079697	-0.279212	-0.585994
YBR268W	MRPL37	-0.0151635	-0.496532	-0.0496054		YBR241C		0.167255	-0.124991	-0.0334048
YBR269C		0.0486203	-1.09918	-0.763668		YBR242W		-0.349235	-0.689587	-0.0666256
YBR271W		0.634942	0.449021	0.214663		YBR243C	ALG7	-0.00886345	0.197479	-0.0964367
YBR273C		0.0505719	-0.0419569	0.00210373		YBR244W	GPX2	-0.212434	-0.383835	-0.145125
YBR274W	CHK1	-0.338678	-0.317786	-0.101788		YBR245C	ISW1	-0.119864	0.10817	-0.308346
YBR277C		-0.682297	0.37624	-0.690476		YBR246W		0.168626	0.270852	0.0349043
YBR278W	DPB3	-0.119337	0.0255751	-0.128771		YBR247C	ENP1	0.0192521	-0.108357	-0.125699
YBR279W	PAF1	-0.873694	-0.132771	0.152694		YBR248C	HIS7	0.0654784	-0.147479	0.158152
YBR282W	MRPL27	-0.246952	-0.397079	-0.333452		YBR249C	ARO4	0.0403663	-0.0528021	-0.267241
YBR283C	SSH1	0.011646	0.237292	0.24099		YBR250W		-0.190255	-0.26784	-0.416736
YBR286W	APE3	0.0881645	0.0941628	-0.190944		YBR251W	MRPS5	0.430533	0.537457	0.565228
YBR287W		0.452811	0.0298764	-0.239503		YBR252W	DUT1	0.15273	0.0446934	-0.124638
YBR288C	APM3	-0.312816	-0.418784	-0.311419		YBR253W	SRB6	-0.00257909	0.020265	-0.276753
YBR290W	BSD2	0.0166851	-0.1009	0.110305		YBR254C	TRS20	0.369803	-0.0264608	-0.0961715
YBR291C	CTP1	0.277345	-0.154714	-0.171545		YBR255W		-0.293841	-0.705627	-0.505536
YBR293W		-0.0926133	-0.236494	-0.305921		YBR256C	RIB5	-0.156465	-0.0342021	0.312333
YBR295W	PCA1	-0.00555819	0.336585	0.258265		YBR257W	POP4	0.236553	0.0536292	-0.130429
YBR296C	PHO89	-1.94689	-1.11219	1.10641		YBR258C	SHG1	0.0603615	-0.0622084	0.143111
YBR297W	MAL33	-0.478846	-0.546142	-0.143808		YBR260C	RGD1	-0.503303	-0.287212	-0.81071
YBR298C	MAL31	0.173975	1.44664	1.52785		YBR261C		-0.411313	-0.398569	-0.413347
YBR300C		-0.477079	-0.574483	-0.344616		YBR262C		0.172618	0.198585	0.275153
YBR301W	DAN3	-0.264518	-0.25331	-0.419174		YBR263W	SHM1	-0.0990142	-0.0428849	-0.0116757
YCL075W		0.161224	-0.175695	0.306559		YBR264C	YPT10	0.182138	0.27525	-0.0897531
YCL073C		0.704141	1.06123	-0.107607		YBR265W	TSC10	0.366653	0.178738	-0.0305095
YCL069W		0.0380512	-0.23259	-0.336448		YBR266C		0.640822	-0.0395026	0.254283
YCL067C	MHLALPHA2		-0.441381			YBR267W		0.546747	0.517688	-0.00247017
YCL066W	HMLALPHA1	-0.908982	-0.0078961	-0.373512		YBR268W	MRPL37	0.264307	0.126071	-0.114543
YCL064C	CHA1	2.13259	1.52078	1.60628		YBR269C		-0.236902	-0.0493159	-0.665966
YCL061C	MRC1	0.205822	-0.414387	-0.142052		YBR271W		0.353612	-0.163378	-0.270619
YCL059C	KRR1	-0.0265456	-0.334038	0.146716		YBR273C		0.0847626	0.355227	-0.0961092
YCL058C	FYV5	-0.489079	-0.797874	0.0167392		YBR274W	CHK1	-0.00922177	0.168484	-0.149026
YCL056C		-0.147413	0.123891	-0.182016		YBR277C		1.27107	1.80018	1.64112
YCL055W	KAR4	0.837375	0.386713	0.255559		YBR278W	DPB3	0.215001	0.199246	0.109971
YCL052C	PBN1	-0.373495	-0.111143	-0.607708		YBR279W	PAF1	-0.148836	0.404693	0.0103752
YCL051W	LRE1		1.16223	-0.236105		YBR282W	MRPL27	0.172674	0.0929424	-0.178695
YCL050C	APA1	0.674922	0.310886	-0.239823		YBR283C	SSH1	-0.0273737	0.133974	0.212013
YCL048W		0.0544328	0.48343	-0.0182133		YBR285W		-0.595024	0.468944
YCL047C		0.410031	0.436858	-0.0433455		YBR286W	APE3	-0.31353	-0.239189	-0.0632409
YCL044C		-0.29751	-0.155514	-0.276623		YBR287W		-0.0396591	-0.102098	-0.281374
YCL043C	PDI1	0.284155	-0.166009	-0.347005		YBR288C	APM3	-0.412495	-0.0878096	-0.307359
YCL040W	GLK1	-0.236379	0.231943	-0.952633		YBR289W	SNF5	-1.79383	-2.52334	-2.70896
YCL038C	AUT4	-0.641909	1.6509	1.26975		YBR290W	BSD2	0.349776	0.481995	0.394378
YCL037C	SRO9	0.255161	-0.380893	-0.377052		YBR291C	CTP1	0.598057	0.470787	0.288821
YCL036W	GFD2	0.458847	-1.03905	-0.345118		YBR293W		-0.30974	-0.16739	-0.64656
YCL035C	GRX1	-0.251617	0.479427	-0.0493474		YBR295W	PCA1	0.111353	0.340945	0.35109
YCL034W	LSB5	-0.297462	0.173204	-0.613222		YBR296C	PHO89	2.57749	0.898665	2.36691
YCL033C		-0.963194	-0.0367473	0.174063		YBR297W	MAL33	-0.105284	0.0710315	-0.0504662
YCL032W	STE50	-0.143651	0.0768164	0.332965		YBR298C	MAL31	0.179646	0.754482	0.319934
YCL031C	RRP7	0.207227	-0.178739	-0.204476		YBR299W	MAL32	1.62039	-0.897565	0.443624
YCL029C	BIK1	-0.35326	-0.162837	-0.0558673		YBR300C		-0.443191	-0.361456	-0.53533
YCL028W	RNQ1	0.0716251	0.254298	0.370116		YBR301W	DAN3	-0.44241	-0.396311	-0.577269
YCL026C-B	HBN1	-1.54314				YCL075W		-1.65508	-0.360134	-2.02868
YCL023C		-0.979343	-0.493971	-3.2794		YCL073C		-0.00324538	-0.0458998	-0.482695
YCL022C		-0.15334	-2.1501	0.211174		YCL069W		0.0526497	0.0664215	-0.188356
YCL021W-A		0.156027	0.176087	-0.0259105		YCL068C		2.14516
YCL020W		0.328136	-0.324534	-0.543102		YCL067C	MHLALPHA2	0.760607	1.10631	0.554912
YCL018W	LEU2	0.50515	-0.407858	-0.287953		YCL066W	HMLALPHA1	-0.916556	-0.197172	-0.59719
YCL017C	NFS1	-0.325798	-0.0589168	-0.259389		YCL064C	CHA1	-1.59039	-1.6013	-2.69741
YCL016C	DCC1	-0.375473	-0.165587	0.0422068		YCL061C	MRC1	0.437111	0.220308	0.00855801
YCL014W	BUD3	0.088347	0.330539	0.331278		YCL059C	KRR1	-0.562097	0.134376	-0.392251
YCL012C		-0.569756	-0.0852848	-0.395426		YCL058C	FYV5	-0.129158	-0.321809	-0.296121
YCL011C	GBP2	-0.0956087	-0.380098	-0.208058		YCL056C		-0.546973	-0.136773	-0.309263
YCL010C	SGF29	-0.231195	0.0761985	-1.74209		YCL055W	KAR4	0.684383	-0.00556543	0.1176
YCL009C	ILV6	0.26411	0.366019	0.153028		YCL052C	PBN1	-0.0230429	0.151809	0.0748569
YCL007C	CWH36	-0.55479	-0.86124	-0.425246		YCL051W	LRE1
YCL005W-A	VMA9	-0.120718	0.136402	-0.196282		YCL050C	APA1	-0.160009	-0.113814	-0.131709
YCL005W		0.193184	-0.0651434	-0.132451		YCL048W		-0.328056	0.230942	-0.0216781
YCL004W	PGS1	0.534391	0.648191	0.236978		YCL047C		0.176336	0.468005	0.65674
YCL003W		-1.03146	-0.64919	-1.90785		YCL046W			-1.00338	-0.111488
YCL001W	RER1	0.0496574	0.0135772	0.0588278		YCL044C		0.234023	0.0122488	0.0828082
YCR002C	CDC10	-0.139873	-0.118058	0.126669		YCL043C	PDI1	0.162351	0.0737674	-0.328588
YCR003W	MRPL32	-0.368686	0.403226	-0.368236		YCL040W	GLK1	-0.233739	-0.465539	1.28714
YCR004C	YCP4	0.109714	0.107455	-0.0519665		YCL038C	AUT4	0.416863	1.15095	0.549803
YCR005C	CIT2	0.928656	1.05928	0.506492		YCL037C	SRO9	0.282293	-0.308979	0.132163
YCR006C		0.522779		0.265563		YCL036W	GFD2	0.293116	-0.948746	-0.344678
YCR007C		-0.189968	0.480798	1.65413		YCL035C	GRX1	-0.486521	0.594	0.202003
YCR008W	SAT4		-2.87487	-2.07694		YCL034W	LSB5	-0.0538188	-0.108069	0.19174
YCR009C	RVS161	0.250518	0.549891	0.20735		YCL033C		0.176479	0.565177	-0.472893
YCR010C	ADY2	0.325123	0.231286	0.106926		YCL032W	STE50	0.130749	0.26043	0.399399
YCR011C	ADP1	-0.0889936	0.587349	-0.691322		YCL031C	RRP7	-0.296783	-0.00101984	-0.440109
YCR012W	PGK1	0.370098	0.0574787	-0.410948		YCL029C	BIK1	0.198688	0.000624928	0.203028
YCR013C		0.672454	0.10171	-0.549294		YCL028W	RNQ1	-0.0210706	0.447861	0.0365653
YCR014C	POL4	-1.77815	-5.17649			YCL026C-B	HBN1	-1.54731	-0.530705	-1.98085
YCR015C		-0.224941				YCL026C-A	FRM2	-0.4792	0.296414	-1.44342
YCR016W		0.428029	-0.456178	0.338866		YCL023C		0.0624859	0.286189	0.600305
YCR019W	MAK32	0.158666	0.413531	0.33788		YCL022C		-1.60547	-1.02034	-0.665847
YCR020C-A	MAK31	1.23453	1.09995	0.471654		YCL021W-A		-0.14644	0.180512	-0.255804
YCR021C	HSP30	1.32077	1.70109	0.328553		YCL020W		-0.151541	0.0651446	-0.592335
YCR022C		0.20731	0.463469	-0.341556		YCL018W	LEU2	0.697976	0.131016	0.675231
YCR023C		0.349495	0.566448	0.10839		YCL017C	NFS1	-0.0639206	0.266384	0.292781
YCR024C		-0.239911	-0.1644	-0.334726		YCL016C	DCC1	0.456153	0.236233	0.253546
YCR024C-A	PMP1	1.53675	1.96249	-0.581416		YCL014W	BUD3	-0.193796	0.219021	0.0495524
YCR025C		1.16622	-0.821458	-0.167663		YCL012C		-0.876416	-0.0709529	0.159648
YCR028C	FEN2	-0.422579	0.892656	0.625309		YCL011C	GBP2	0.0804545	0.0617311	-0.158612
YCR028C-A	RIM1	0.616991	0.032598	0.0614951		YCL010C	SGF29	-0.0158541	-0.0728106	0.0487067
YCR030C	SYP1	-0.359961	0.842416	0.279343		YCL009C	ILV6	-0.142036	0.15424	-0.185425
YCR031C	RPS14A	0.747204	0.256109	-0.0283892		YCL008C	STP22	-2.70112
YCR032W	BPH1	-0.117485	0.0183548	-0.529849		YCL007C	CWH36	-0.522046	-0.0422308	-0.412122
YCR033W	SNT1	-0.319467	-0.0267724	-0.281096		YCL005W-A	VMA9	0.16208	0.386042	-0.462473
YCR034W	FEN1	0.918011	0.216094	0.441928		YCL005W		0.0831634	0.30364	-0.196135
YCR036W	RBK1	0.454682	-0.0532663	1.1006		YCL004W	PGS1	0.129011	0.318556	0.160467
YCR038C	BUD5	-0.135938	0.787555	0.669442		YCL003W		-0.579229	0.366102	-0.871882
YCR039C	MATALPHA2	0.60543	0.304972	-1.20447		YCL002C		2.20334	1.67603	2.24835
YCR040W	MATALPHA1	-0.693248	-1.68856			YCL001W-A		-0.234778	-1.04741	-0.280041
YCR041W		0.602372	0.640777	0.531423		YCL001W	RER1	0.0289902	0.423074	0.253703
YCR042C	TSM1	0.262114	0.0106711	0.330844		YCR002C	CDC10	0.404794	0.201743	0.211347
YCR043C		0.38922	-1.08669	-0.280921		YCR003W	MRPL32	0.404093	0.694214	0.242462
YCR044C	PER1	0.0925571	-0.307112	-0.426576		YCR004C	YCP4	-0.287439	0.172641	-0.264117
YCR045C		-0.10054	-0.128251	-0.338405		YCR005C	CIT2	-0.349931	-0.497818	-0.555822
YCR046C	IMG1	0.867398	-0.0337667	-0.220842		YCR006C			-0.278739	-0.0985195
YCR047C	BUD23	0.502062	-0.178947	0.109807		YCR007C		-0.8003	-0.158522	-0.393962
YCR048W	ARE1	-1.04624	0.748918	0.392595		YCR008W	SAT4	-0.510449	0.179933	-1.01683
YCR049C		-0.109999	-0.811314	-0.176344		YCR009C	RVS161	-0.177767	-0.0508458	0.0124884
YCR052W	RSC6	-0.177778	-0.153606	-0.0110629		YCR010C	ADY2	0.567135	-0.0859697	-0.119863
YCR054C	CTR86	0.0866935	-0.0731304	-0.279892		YCR011C	ADP1	0.461191	0.261839	-0.254423
YCR057C	PWP2	0.940959	-0.0781909	0.741953		YCR012W	PGK1	-0.168269	-0.0771457	-0.295389
YCR059C	YIH1	-0.262997	-0.0850788	-0.0684355		YCR013C		-0.534826	0.0477381	-0.631199
YCR060W		-0.0428678	-0.231911	-0.53073		YCR015C		-0.503659	0.308944	-0.286202
YCR061W		0.657372	1.48376	0.685488		YCR016W		0.260661	0.10943	0.0286636
YCR063W	BUD31	0.238841	-0.562968	0.0948336		YCR019W	MAK32	-0.305355	0.112548	0.00519361
YCR064C		1.07684	0.513636	0.67887		YCR020C	PET18	-1.61554	0.279652	-0.894729
YCR065W	HCM1	0.107535	-0.24198	-0.316221		YCR020C-A	MAK31	-0.503476	0.132551	0.0780251
YCR066W	RAD18	-0.275941	0.0860161	0.135669		YCR021C	HSP30	-1.19072	-0.0765664	1.4462
YCR067C	SED4	0.11953	-0.027299	-0.298778		YCR022C		-0.777792	0.925574	0.431788
YCR068W	CVT17	-0.199983	-0.156991	-0.191161		YCR023C		0.0588533	0.121506	0.382148
YCR069W	CPR4	0.0725777	0.15627	0.152563		YCR024C		-0.241809	0.0537086	-0.352041
YCR071C	IMG2	0.212947	0.269313	0.408808		YCR024C-A	PMP1	0.0453885	-0.0954411	-0.903947
YCR072C	RSA4	0.207957	-1.04559	-0.270369		YCR025C		-1.18901	-0.973458	-1.24203
YCR073W-A	SOL2	-0.547285	-0.397804	0.048961		YCR028C	FEN2	-0.0118434	0.386603	0.0310392
YCR075C	ERS1	-0.0149587	-0.16795	0.0558693		YCR028C-A	RIM1	0.731467	0.776625	0.445667
YCR079W		-0.559424	-0.405866	-0.117877		YCR030C	SYP1	-0.0136151	0.306773	-0.635442
YCR081W	SRB8	0.278853	0.250763	0.334408		YCR031C	RPS14A	-0.303381	-0.51449	-0.423767
YCR082W		-0.406465	-0.295212	0.0412435		YCR032W	BPH1	-0.157498	-0.648757	-0.0728898
YCR083W	TRX3	-0.814808	0.333944	0.038453		YCR033W	SNT1	-0.420127	-0.392007	-0.716055
YCR084C	TUP1	-0.858723	0.511893	0.0891294		YCR034W	FEN1	0.314765	0.367665	-0.0925214
YCR086W	CSM1	0.402845	0.761007	-1.42056		YCR036W	RBK1	0.132388	0.298709	0.087332
YCR087W		0.0844387	0.362625	0.402881		YCR038C	BUD5	-0.16554	0.17567	-0.28663
YCR088W	ABP1	-0.40568	-0.445705	-0.092914		YCR039C	MATALPHA2	-0.00260376	-0.352339	-0.319832
YCR090C		0.710628	-1.70042	-1.13581		YCR040W	MATALPHA1	-0.392144	-0.487886	0.323347
YCR091W	KIN82	-1.42124	-9.74783	-1.92356		YCR041W		-0.631717	-0.468666	-0.306952
YCR094W	CDC50	0.191265	0.0338488	0.070931		YCR042C	TSM1	0.0608151	0.346093	0.321006
YCR096C	HMRA2	-0.61236		-0.873809		YCR043C		-0.167579	1.01513	0.0534812
YCR099C		-1.1778	0.263349	-0.267332		YCR044C	PER1	0.0834828	0.177304	-0.173079
YCR101C		-2.14276	-1.38029	-0.525468		YCR045C		0.0423622	0.121596	-0.0111852
YCR102C		0.339098	0.273804	0.973855		YCR046C	IMG1	-0.25831	-0.0581229	-0.000354378
YCR105W	ADH7	0.320474	0.211949	0.510291		YCR047C	BUD23	0.0501409	0.174484	0.19111
YCR106W	RDS1	0.178692	0.00567425	0.0809946		YCR048W	ARE1	0.325759	0.331999	0.299692
YCR107W	AAD3	0.990902	1.25676	0.988258		YCR049C		-0.751602	0.451354	1.91603
YDL247W	MPH2	-0.653978	0.561587	0.316751		YCR052W	RSC6	-0.134892	0.516307	-0.0839377
YDL246C	SOR2	-0.393297	0.643548	0.79255		YCR054C	CTR86	0.017233	0.0215741	-0.0233116
YDL245C	HXT15	0.559579	0.81582	1.09577		YCR057C	PWP2	0.0358015	0.13547	-0.0276784
YDL243C	AAD4	-1.00569	0.890405	0.839914		YCR059C	YIH1	-0.0907095	0.147432	-0.121826
YDL241W		-1.32443	0.147608	0.726529		YCR060W		-0.0891158	-0.39453	-0.137273
YDL240W	LRG1	-0.174169	1.15005	0.731763		YCR061W			-0.174444	0.757663
YDL238C		-1.7193	0.382189	-0.209297		YCR063W	BUD31	0.143503	-0.443025	0.112078
YDL237W		0.279459	0.651881	0.389578		YCR064C		0.468668	-0.245326	-0.0998788
YDL236W	PHO13	0.673382	0.781161	0.340399		YCR065W	HCM1	0.273742	-0.271404	0.0107022
YDL235C	YPD1	-0.262832	0.144396	-0.0583205		YCR066W	RAD18	0.11449	0.19833	0.477843
YDL231C	BRE4	0.194617	0.681828	0.438914		YCR067C	SED4	-0.146812	-0.131162	-0.273385
YDL230W	PTP1	0.171911	0.391255	0.733272		YCR068W	CVT17	0.149129	0.0999806	0.195111
YDL226C	GCS1	0.265849	0.414961	0.265472		YCR069W	CPR4	-0.272718	0.204651	-0.254109
YDL225W	SHS1	-0.197233	0.168642	0.297534		YCR071C	IMG2	-0.277213	0.261069	0.303051
YDL223C	HBT1	0.34194	1.59099	1.5497		YCR072C	RSA4	0.442552	-0.283458	-0.227575
YDL219W	DTD1	-0.186773	-0.0915523	-0.461005		YCR073W-A	SOL2	-0.551602	0.0834642	-0.131014
YDL218W		0.0168025	0.199909	0.0294851		YCR075C	ERS1	0.316133	0.567326	0.0182419
YDL217C	TIM22	-0.0962352	-0.0292038	0.185522		YCR077C	PAT1	-2.6649
YDL216C	RRI1	-0.389518	-0.199795	0.513522		YCR079W		-0.298093	-0.291395	-0.32124
YDL215C	GDH2	-0.217345	0.870399	0.384936		YCR081W	SRB8	0.106589	0.387126	-0.0679186
YDL214C	PRR2	1.03034	-1.04827	0.504323		YCR082W		0.219905	0.130147	-0.137153
YDL212W	SHR3	-0.356173	0.264805	0.209134		YCR083W	TRX3	1.05112	0.658757	1.52704
YDL211C		0.0318085	0.231214	0.442592		YCR084C	TUP1	-0.240402	0.265353	-0.164415
YDL210W	UGA4	0.0283564	1.48824	1.0179		YCR086W	CSM1	1.07979	0.157443	-0.280897
YDL209C	CWC2	0.180156	0.406596	0.199151		YCR087W		-0.0199998	0.355654	-0.0267335
YDL208W	NHP2	0.279402	-0.343135	-0.0392554		YCR088W	ABP1	-0.243556	0.346482	0.0824616
YDL207W	GLE1	-1.13439	0.239385	0.202814		YCR090C		-0.402246	-0.170414	-0.858863
YDL206W		-0.284335	0.815468	0.780626		YCR091W	KIN82	0.244869	-0.839589	-1.02497
YDL205C	HEM3	0.368356	0.151914	0.386012		YCR094W	CDC50	0.172492	0.605838	0.151186
YDL204W	RTN2	-0.0215808	1.45197	0.581443		YCR096C	HMRA2	0.0808597	-0.126982	-0.088461
YDL203C		-0.180549	0.883344	0.68768		YCR097W-A		-0.0500651	-3.14872	-3.2687
YDL202W	MRPL11	-0.073024	-0.053315	0.036508		YCR099C		0.247369	0.429463	1.02459
YDL199C		-0.733454	-0.378484	0.344206		YCR101C		-0.863737	1.99978	1.55551
YDL197C	ASF2	-0.307479	0.761986	0.340524		YCR102C		-0.0702828	1.10277	0.883987
YDL194W	SNF3	-0.424725	0.886497	1.28467		YCR102W-A			-0.709518	-1.29288
YDL193W		-0.314416	0.23494	-0.0095275		YCR104W	PAU3	-0.555441	-0.261928	-0.586524
YDL192W	ARF1	0.116751	-0.0728832	-0.0695196		YCR105W	ADH7	0.170725	0.212354	0.54513
YDL191W	RPL35A	0.107694	-0.286344	-0.0950756		YCR106W	RDS1	0.306754	0.0702373	0.309183
YDL190C	UFD2	-0.141041	0.70464	0.704418		YCR107W	AAD3	0.32871	0.261807	0.32846
YDL189W	RBS1	-0.573988	-0.134891	-0.883982		YDL247W	MPH2	0.18995	0.317375	0.511359
YDL188C	PPH22	1.03845	1.20608	1.20814		YDL246C	SOR2	0.0304307	0.461882	-0.246391
YDL186W		-0.421023	-0.61899	-1.81534		YDL245C	HXT15	0.67164	0.847719	0.700554
YDL185W	VMA1	-0.407613	0.796292	0.241339		YDL243C	AAD4	-0.719781	0.222126	-0.302016
YDL184	RPL47A	0.393771	-1.81609	-0.381192		YDL241W		-0.233892	0.357265	0.295571
YDL182W	LYS20	-0.573613	0.716614	0.683296		YDL240W	LRG1	0.0473818	0.492786	0.285272
YDL181W	INH1	0.660428	0.242579	0.0869008		YDL239C	ADY3	0.635132	0.95199	0.591138
YDL179W	PCL9	0.359682	0.00761142	-0.0407946		YDL238C		-0.489094	-0.0633349	0.0195289
YDL178W	DLD2	-1.30841	0.238662	-0.151226		YDL237W		0.502213	0.385262	0.339118
YDL177C		0.173316	0.0181103	0.459119		YDL236W	PHO13	0.201817	-0.0384814	-0.036979
YDL176W			0.294258	-0.406593		YDL235C	YPD1	-0.651868	-0.0257132	-0.331569
YDL175C	AIR2	-1.3667	0.2286	0.2632		YDL232W	OST4	-0.524582	0.00437702	-0.79417
YDL174C	DLD1	0.0571655	1.09052	0.732223		YDL231C	BRE4	0.110777	0.0918696	-0.114765
YDL173W		0.0513325	0.109065	-0.639228		YDL230W	PTP1	-0.24316	0.499071	-0.158152
YDL172C		0.157195	0.463936	0.310873		YDL227C	HO	0.858767	-2.60287	-3.6221
YDL169C	UGX2	0.408749	1.03338	0.500908		YDL226C	GCS1	-0.254992	0.455843	-0.503683
YDL168W	SFA1	0.5318	0.701815	0.468706		YDL225W	SHS1	0.152216	0.416727	0.0326097
YDL167C	NRP1	-0.453668	-1.30194	-0.162523		YDL223C	HBT1	0.109706	0.511295	0.582403
YDL166C	FAP7	0.108459	0.132431	-0.0138527		YDL219W	DTD1	-0.296168	0.120403	-0.362153
YDL165W	CDC36	0.0377772	-1.26302	-0.0568906		YDL218W		-0.0389254	-0.0302714	-0.222974
YDL161W	ENT1	-1.00478	0.840154	-1.10564		YDL217C	TIM22	0.0318163	0.121956	0.185243
YDL157C		0.51591	-1.52741	0.760501		YDL216C	RRI1	-0.112372	0.483715	0.552324
YDL156W		-0.116579	-0.146592	-0.0436536		YDL215C	GDH2	0.542049	0.0193061	-0.190204
YDL155W	CLB3	-0.0714966	0.0614191	0.243137		YDL214C	PRR2	0.389133	0.105694	-0.787171
YDL154W	MSH5	0.228833	1.15185	0.463154		YDL212W	SHR3	-0.151806	0.248556	-0.190204
YDL153C	SAS10	-0.145884	0.374287	0.750571		YDL211C		-0.224086	0.599494	-0.123578
YDL151C	BUD30	1.0696	0.178024	0.618405		YDL210W	UGA4	0.426075	1.0927	0.593031
YDL149W	APG9	1.12069	2.63692	1.47973		YDL209C	CWC2	-0.131281	0.501122	-0.411958
YDL148C	NOP14	0.377084	0.39936	0.929115		YDL208W	NHP2	-0.447641	-0.150612	-0.202756
YDL147W	RPN5	-0.172614	1.28461	1.36024		YDL207W	GLE1	-0.355784	0.12455	0.094774
YDL146W		0.364929	0.574679	0.242911		YDL206W		-0.499651	-0.0970346	0.251782
YDL145C	COP1	0.293954	1.10123	1.15701		YDL205C	HEM3	0.218673	0.144684	0.0735246
YDL144C		-0.295423	0.324303	0.0678391		YDL204W	RTN2	-0.509154	-0.00265996	-0.313263
YDL143W	CCT4	1.4658	1.36923	1.38215		YDL203C		0.00260546	-0.075911	0.0165406
YDL142C	CRD1	-0.102228	0.11037	0.00402578		YDL202W	MRPL11	0.371745	0.234505	0.0574884
YDL140C	RPO21	-0.248206	0.336665	-0.231142		YDL199C		0.0732297	0.522967	0.249703
YDL139C	SCM3	-0.397927	-0.345624	-0.543567		YDL197C	ASF2	-0.324113	0.774998	0.132492
YDL138W	RGT2	-0.250243	-0.263745	-0.0736349		YDL195W	SEC31	-1.42347	0.474	-2.25394
YDL137W	ARF2	0.0649541	-0.0487315	-0.444609		YDL194W	SNF3	0.584375	0.509737	0.691413
YDL136W	RPL35B	0.42568	-0.0587679	0.231472		YDL193W		0.243988	0.284015	0.0506757
YDL135C	RDI1	0.273399	0.43243	0.191947		YDL192W	ARF1	-0.27403	0.200329	-0.261187
YDL134C	PPH21	0.514508	0.934913	0.694767		YDL191W	RPL35A	-0.616174	-0.168616	-0.362164
YDL132W	CDC53	-0.567172	-0.406712	-0.289467		YDL190C	UFD2	-0.114358	0.199385	0.137343
YDL130W-A	STF1	-0.0461207	-0.144232	-0.329648		YDL189W	RBS1	-0.490682	-0.24429	-1.2336
YDL130W	RPP1B	0.0781896	-0.0595892	-0.219372		YDL188C	PPH22	0.344827	1.20095	0.588207
YDL129W		0.626752	0.621645	-0.0225612		YDL186W		-0.277725	-0.754447	-0.401839
YDL128W	VCX1	-0.270432	0.589307	0.629134		YDL185W	VMA1	-0.847223	0.467899	0.301044
YDL127W	PCL2	-0.0817201	-0.394156	-0.558564		YDL184	RPL47A	-0.337014	-0.114199	-1.52971
YDL126C	CDC48	0.342014	1.1517	0.845456		YDL182W	LYS20	-0.0412434	-0.100995	-0.277876
YDL125C	HNT1	0.46885	0.452915	0.247693		YDL181W	INH1	-0.576598	0.23988	-0.341827
YDL124W		0.552554	0.793085	0.272925		YDL179W	PCL9	-0.00423588	-0.275561	-0.419384
YDL121C		-1.04286	-1.05672	-0.612024		YDL178W	DLD2	-0.0867348	0.465031	-0.431976
YDL120W	YFH1	-0.0628905	-0.161786	-0.293568		YDL177C		-0.263247	-0.066851	0.0406936
YDL119C		0.120257	0.447351	0.292734		YDL176W		0.197917	0.892562	-0.323567
YDL118W		-0.667975	0.0392752	-0.306209		YDL175C	AIR2	-0.0860008	0.579925	-0.461419
YDL117W	CYK3	0.0417022	1.0267	1.05517		YDL174C	DLD1	0.54962	0.226519	0.410986
YDL116W	NUP84	0.967212	1.31365	1.15626		YDL173W		-0.168516	0.169834	-0.153755
YDL115C	IWR1	-0.273527	-0.289409	0.155103		YDL172C		0.0350748	0.297808	0.0812212
YDL114W		0.0314103	-0.0182805	0.140383		YDL169C	UGX2	0.32042	0.441125	-0.0884215
YDL113C	CVT20	-0.240476	0.606683	0.272636		YDL168W	SFA1	-0.202695	0.563429	0.176267
YDL111C	RPR42	0.1693	0.146306	0.25631		YDL167C	NRP1	0.00843609	-0.0947064	-0.336897
YDL110C		-0.205156	-0.194902	-0.505022		YDL166C	FAP7	0.21095	-0.0977229	-0.290206
YDL109C		-0.266503	-0.0431625	0.143945		YDL165W	CDC36	0.381561	-0.1863	-0.431418
YDL108W	KIN28	-0.238064	0.290477	0.0988692		YDL162C		0.181946	0.550193	-1.14651
YDL107W	MSS2	-0.429315	0.469731	0.442508		YDL161W	ENT1	0.0294352	-0.407184	-0.197482
YDL106C	PHO2	-0.370154	0.673221	0.0534555		YDL158C		-0.277154	-0.468723	-0.714168
YDL105W	QRI2	0.105698	0.0368857	-0.144483		YDL157C		-0.53649	0.305441	-1.41991
YDL104C	QRI7	-0.213616	0.660333	0.788604		YDL156W		0.183488	-0.0269084	0.17613
YDL102W	CDC2	-0.204057	0.960899	0.428764		YDL155W	CLB3	-0.0555673	0.384709	-0.44243
YDL101C	DUN1	-0.0924735	0.389538	-0.114065		YDL154W	MSH5	0.371033	0.109838	0.0901484
YDL100C		-0.0841199	0.176261	0.0749081		YDL153C	SAS10	0.303977	0.058002	0.121208
YDL099W		0.347355	0.378887	0.478368		YDL151C	BUD30	0.40154	-0.119253	-0.100833
YDL098C	SNU23	0.36339	0.314648	0.344476		YDL149W	APG9	0.342524	0.323607	0.185105
YDL097C	RPN6	0.115908	0.701332	-0.244419		YDL148C	NOP14	0.0366135	0.268967	-0.100437
YDL095W	PMT1	-0.107239	0.556831	0.470227		YDL147W	RPN5	0.335068	0.429417	0.377277
YDL092W	SRP14	0.133752	0.111541	-0.352821		YDL146W		-0.00473166	0.447615	-0.0701895
YDL091C		-0.421361	0.688914	0.580343		YDL145C	COP1	-0.0976344	-0.0104148	-0.304739
YDL088C	ASM4	-0.13438	0.0807702	-0.228408		YDL144C		-0.412162	0.502515	-0.460059
YDL087C	LUC7	0.11913	-0.0182457	0.0368617		YDL143W	CCT4	0.243198	0.409642	0.0317084
YDL086W		0.644591	-0.0325643	0.0465428		YDL142C	CRD1	0.129167	-0.0545542	0.417486
YDL085W	NDE2	-0.20819	0.616545	0.301501		YDL140C	RPO21	-0.868465	0.269793	-0.444295
YDL084W	SUB2	0.175621	1.24818	1.278		YDL139C	SCM3	0.473553	0.664171	0.651833
YDL083C	RPS16B	0.310078	-0.759869	-0.161962		YDL138W	RGT2	-0.111706	-0.00915071	-0.321618
YDL082W	RPL13A	0.115696	-0.299593	0.111323		YDL137W	ARF2	-0.346451	0.249358	-0.442292
YDL081C	RPP1A	1.03443	-0.30828	-0.382657		YDL136W	RPL35B	-0.353308	0.0625412	-0.523001
YDL080C	THI3	0.0906845	0.565825	0.824308		YDL135C	RDI1	-0.0389143	0.359451	-0.12312
YDL079C	MRK1	-0.682613	0.0956733	0.185488		YDL134C	PPH21	-0.0272239	0.682596	0.166575
YDL078C	MDH3	1.18898	1.25913	1.1126		YDL132W	CDC53	0.101135	-0.0273861	-0.103309
YDL076C	RXT3	-0.355887	0.149652	0.0417485		YDL130W-A	STF1	-0.157067	-0.290948	-0.36726
YDL075W	RPL31A	0.397968	-0.0210663	0.165122		YDL130W	RPP1B	-0.0211417	0.170352	-0.219566
YDL074C	BRE1	-0.263853	0.247912	-0.176931		YDL129W		-0.0348494	-0.0297968	-0.16582
YDL073W		-0.00127689	1.53618	1.60305		YDL128W	VCX1	0.0185211	0.416168	0.259965
YDL072C		-0.25807	0.123514	0.239121		YDL127W	PCL2	-0.265591	-0.118168	-0.332411
YDL071C		0.447654	0.124848	-0.274989		YDL126C	CDC48	-0.0661865	0.432943	0.412629
YDL070W	BDF2	-0.792032	0.390181	0.211041		YDL125C	HNT1	0.242783	-0.116808	-0.160041
YDL069C	CBS1	-0.245538	0.387132	0.328459		YDL124W		-0.039332	-0.169288	0.0373116
YDL068W		-1.22847	-1.86848	-0.713852		YDL121C		-0.313349	-0.168595	-0.304503
YDL067C	COX9	0.181732	-0.0778159	-0.740896		YDL120W	YFH1	-0.505926	0.163596	-0.0845287
YDL066W	IDP1	-0.860507	1.21039	0.752177		YDL119C		0.0938888	0.196723	0.181685
YDL065C	PEX19	0.145651	0.115451	-0.0157815		YDL118W		0.184454	0.418824	0.536824
YDL064W	UBC9	0.217357	-0.35519	0.303521		YDL117W	CYK3	0.0165848	0.294164	0.214459
YDL063C		-0.645722	-0.0440012	0.489988		YDL116W	NUP84	0.194825	0.0955785	-0.180106
YDL062W		0.873444	0.359329	0.513227		YDL115C	IWR1	-0.21635	-0.0189015	-0.268836
YDL061C	RPS29B	0.665337	-0.700791	-0.108677		YDL114W		-0.0828669	0.129773	-0.0889074
YDL060W	TSR1	0.345079	0.390847	0.857941		YDL113C	CVT20	-0.372537	0.60364	0.626006
YDL058W	USO1	-1.34218	-0.581444	-0.200559		YDL112W	TRM3	0.757335	0.523601	-1.59634
YDL057W		-0.170722	-0.00124068	-0.244634		YDL111C	RPR42	0.345896	0.373423	-0.0403583
YDL055C	PSA1	0.812517	0.692922	0.426978		YDL110C		0.70891	-0.0630103	0.0874779
YDL053C	PBP4	0.399124	0.115188	0.258508		YDL109C		0.18718	0.12459	-0.0559391
YDL052C	SLC1	0.179781	-0.07723	-0.0379951		YDL108W	KIN28	-0.0603871	0.275425	-0.38528
YDL050C		0.257606	0.0505342	-0.276215		YDL107W	MSS2	-0.0235388	0.58141	-0.121979
YDL049C	KNH1	0.911522	0.824084	-1.39143		YDL106C	PHO2	0.457739	0.721261	0.350778
YDL047W	SIT4	0.362536	1.72086	-0.176472		YDL105W	QRI2	-0.14774	0.503095	-0.262541
YDL046W	NPC2	-0.0813021	-0.130842	-0.213045		YDL104C	QRI7	0.394035	0.531065	0.31709
YDL045C	FAD1	0.277513	0.512223	0.239808		YDL102W	CDC2	0.0328879	0.746212	0.0834113
YDL044C	MTF2	0.168064	0.0747417	-0.0595335		YDL101C	DUN1	0.343817	0.179584	0.0214728
YDL043C	PRP11	0.366204	-0.381277	-0.495105		YDL100C		-0.431534	0.433058	-0.335308
YDL042C	SIR2	0.681916	0.811222	0.674986		YDL099W		-0.0156059	0.539195	-0.028581
YDL041W	KRE26	-0.455193	-0.172671	-0.862211		YDL098C	SNU23	0.0594208	0.22831	0.272923
YDL039C	PRM7	-1.44251	-0.109877	-0.00379468		YDL097C	RPN6	0.206178	0.390529	-0.0922192
YDL037C	BSC1	-0.540474				YDL095W	PMT1	0.16589	0.698082	0.418696
YDL036C		-0.538897	-0.0307591	-0.294838		YDL093W	PMT5	0.864986	0.842351	0.339727
YDL034W		-0.0961481	0.0282063	0.0474079		YDL092W	SRP14	-0.801924	-0.232058	-0.196981
YDL033C		-0.772854	0.202654	0.463005		YDL091C		0.15016	0.375162	0.496178
YDL031W	DBP10	0.82045	1.66445	1.45445		YDL088C	ASM4	0.0981326	0.0806081	-0.169455
YDL030W	PRP9	0.230684	0.04057	-0.265078		YDL087C	LUC7	0.25114	-0.0293813	0.269321
YDL029W	ARP2	-0.600557	1.67163	1.85947		YDL086W		0.361631	-0.0230849	0.135747
YDL027C		-0.233652	0.755267	1.19151		YDL085W	NDE2	0.220232	0.390318	0.0830753
YDL026W		-0.0275348	0.0505256	-0.251842		YDL084W	SUB2	0.15588	0.805018	0.343599
YDL025C		0.817456	3.11967	2.41127		YDL083C	RPS16B	-0.330171	0.153123	-0.428231
YDL024C	DIA3	1.1682	1.46525	1.12229		YDL082W	RPL13A	0.0832471	0.127379	-0.0512033
YDL023C		-0.604888	0.127903	-0.458927		YDL081C	RPP1A	-0.217389	0.082162	-0.770031
YDL022W	GPD1	-0.129238	0.699562	0.039041		YDL080C	THI3	-0.0329814	0.399102	-0.160119
YDL021W	GPM2	0.316404	0.323193	0.109234		YDL079C	MRK1	-0.091387	0.167361	-0.303763
YDL020C	RPN4	-0.00872874	0.532061	0.123947		YDL078C	MDH3	0.443702	0.7606	0.0918637
YDL018C	ERP3	-0.731926	-1.45478	-0.640597		YDL076C	RXT3	-0.0815863	0.0539598	0.190721
YDL017W	CDC7	0.0035821	0.235427	0.0133784		YDL075W	RPL31A	-0.121799	0.423648	-0.466446
YDL015C	TSC13	-0.0578479	-0.0296892	0.22962		YDL074C	BRE1	-0.432483	-0.584794	-0.9693
YDL013W	HEX3	-1.08527	0.217781	0.447122		YDL073W		0.0956017	0.802605	0.687872
YDL012C		-0.138545	0.199635	0.555809		YDL072C		-0.199728	0.350691	-0.161523
YDL011C		0.150705	0.0249854	0.94189		YDL071C		0.255836	0.177503	0.36889
YDL010W		0.0349605	0.427902	1.14541		YDL070W	BDF2	-0.194819	0.301825	-0.247163
YDL008W	APC11	-0.183438	0.0242297	0.0911425		YDL069C	CBS1	0.0346104	0.210998	-0.0333523
YDL007W	RPT2	0.303769	0.812939	0.0200981		YDL068W		0.741325	0.864136	0.807121
YDL006W	PTC1	0.0734278	-0.341727	-0.820986		YDL067C	COX9	0.0349631	0.0543308	-0.177244
YDL005C	MED2	0.42926	0.777068	0.432196		YDL066W	IDP1	0.177865	0.62625	0.159064
YDL004W	ATP16	0.512596	0.555243	0.312629		YDL065C	PEX19	0.131386	0.306054	-0.42239
YDL003W	MCD1	-0.0836774	-0.355981	-0.116886		YDL064W	UBC9	-0.244131	0.0412496	-0.384108
YDL002C	NHP10	0.436418	0.083433	0.0815114		YDL063C		-0.186072	0.00125729	-0.10938
YDR002W	YRB1	0.411573	0.106833	-0.305882		YDL062W		0.302437	-0.233366	-0.722083
YDR003W		0.305914	0.681433	-0.00370737		YDL061C	RPS29B	-0.371552	0.0979509	-0.274839
YDR004W	RAD57	-0.252981	1.02845	0.292804		YDL060W	TSR1	0.579994	0.12826	-0.0687107
YDR005C	MAF1	0.461432	1.1751	1.03914		YDL058W	USO1	-0.381819	-0.313799	-0.0586804
YDR007W	TRP1	0.3745	0.731664	0.322459		YDL057W		0.156897	0.615604	-0.229669
YDR009W	GAL3	2.26331	2.28855	2.28666		YDL055C	PSA1	0.194572	0.776443	-0.308001
YDR010C		0.202505	-1.43054	-0.391571		YDL053C	PBP4	-0.130514	-0.21513	-0.443583
YDR011W	SNQ2	0.0110436	-0.441585	-0.0125789		YDL052C	SLC1	-0.136565	0.221676	-0.213586
YDR012W	RPL4B	0.587558	-0.17222	0.0169944		YDL050C		-0.459934	-0.532626	-0.575389
YDR013W		0.336922	0.169279	0.0354056		YDL049C	KNH1	0.630986	0.227077	0.662695
YDR014W	RAD61	-1.26427	1.23371	-0.379615		YDL047W	SIT4	-0.217344	0.150734	0.0122099
YDR014W-A	HED1	-0.758152	-0.677664	-0.0524233		YDL046W	NPC2	-0.279971	-0.274457	-0.0445876
YDR015C		0.55102	0.420771	1.15456		YDL045C	FAD1	0.621024	0.402253	0.646322
YDR017C	KCS1	0.804484	1.01129	0.802186		YDL044C	MTF2	-0.10315	0.135479	0.215717
YDR017W	CDC7	0.388308	0.362181	0.261623		YDL043C	PRP11	0.536067	0.352086	0.355438
YDR018C		-0.209841	0.159226	0.259268		YDL042C	SIR2	0.545669	0.87014	0.41587
YDR019C	GCV1	-0.188284	0.272516	0.46413		YDL041W	KRE26	1.17294	0.437894	0.515625
YDR021W	FAL1	0.194633	0.236458	0.455172		YDL039C	PRM7	0.168597	-0.280409	0.492717
YDR022C	CIS1	0.277473	-0.177799	-0.150469		YDL036C		-0.0157529	0.153982	0.152566
YDR023W	SES1	0.305031	0.427622	-0.502391		YDL034W		0.313187	-0.13623	0.440495
YDR024W	FYV1	0.42112	0.426954	-0.190462		YDL033C		0.501517	0.176205	0.235406
YDR025W	RPS11A	-0.37318	-1.10282	-0.423381		YDL031W	DBP10	0.010659	0.412788	0.553423
YDR026C		0.755322	1.08789	0.956117		YDL030W	PRP9	0.180223	0.0438759	0.15033
YDR029W		0.617821	0.193685	-0.0915395		YDL029W	ARP2	0.390958	0.987019	0.319793
YDR030C	RAD28	-0.333236	-0.275119	-0.0188523		YDL027C		0.143811	0.269924	-0.361977
YDR031W		-0.00686389	-0.0271278	-0.252182		YDL026W		0.997002	0.236068	0.782564
YDR032C	PST2	-0.134133	-0.210259	0.183685		YDL025C		0.294323	0.66281	0.662436
YDR033W	MRH1	0.911225	0.302367	-0.977276		YDL024C	DIA3	0.204823	0.270241	-0.207591
YDR034C	LYS14	0.171654	0.327284	-0.458415		YDL023C		0.594257	0.0405357	0.838012
YDR035W	ARO3	0.256399	0.906388	0.72113		YDL022W	GPD1	-0.00926335	0.338036	0.252803
YDR036C	MRP5	0.613795	0.814556	0.848362		YDL021W	GPM2	-0.0576986	0.135267	-0.0278872
YDR037W	KRS1	-1.92954	0.517957	0.633857		YDL020C	RPN4	-0.126173	0.615108	0.373254
YDR039C	ENA2	0.0428009	1.72679	1.37062		YDL018C	ERP3	-0.344609	-0.116451	-0.552558
YDR040C	ENA1	-0.373596	0.412667	0.385261		YDL017W	CDC7	1.6235	1.25998	1.29714
YDR041W	RSM10	-0.297077	-0.166084	0.038861		YDL015C	TSC13	-0.190145	0.0788775	0.037009
YDR043C	NRG1	0.0080514	0.373494	0.123028		YDL013W	HEX3	-0.0141028	0.181298	0.231563
YDR044W	HEM13	0.21077	0.381392	0.33348		YDL012C		-0.106227	-0.121588	0.280336
YDR045C	RPC11	0.0957438	-0.733479	0.178878		YDL011C		-0.458708	0.245989	-0.302037
YDR046C	BAP3	0.443443	4.10503	3.51133		YDL010W		0.0138063	0.38861	-0.0435796
YDR047W	HEM12	2.93102	2.76503	2.40146		YDL008W	APC11	0.0480816	0.260583	0.121243
YDR049W		0.454978	0.596391	0.625076		YDL007W	RPT2	-0.636847	0.35536	-0.0325622
YDR050C	TPI1	0.560839	0.112531	-0.169163		YDL006W	PTC1	-0.501334	0.12391	-0.299142
YDR051C		0.446125	0.164388	0.13791		YDL005C	MED2	0.33429	0.24113	-0.0924445
YDR052C	DBF4	0.0306135	-0.808729	-0.367622		YDL004W	ATP16	0.0851667	0.318202	-0.139932
YDR053W		0.0659038	0.0748961	-0.252023		YDL003W	MCD1	0.000415282	0.185839	-0.233025
YDR054C	CDC34	-0.225189	0.0019848	0.0216116		YDL002C	NHP10	0.387887	0.0104411	-0.188323
YDR056C		0.463351	0.865053	0.057398		YDR002W	YRB1	0.0439975	0.316486	-0.542307
YDR057W	YOS9	-0.0863892	0.336354	0.0546747		YDR003W		-0.176012	0.422506	0.381446
YDR058C	TGL2	0.668649	0.536439	0.276944		YDR004W	RAD57	1.58456	0.58835	1.36079
YDR059C	UBC5	-0.383248	-0.23478	0.0381509		YDR005C	MAF1	0.470582	0.432973	0.693882
YDR060W	MAK21	-0.0316353	-0.00952908	-0.191675		YDR007W	TRP1	-1.68663	0.519645	-0.559367
YDR061W		0.165116	0.337284	-0.0989925		YDR009W	GAL3	0.839549	1.12194	0.403872
YDR062W	LCB2	0.0861995	0.156669	0.192365		YDR010C		0.164117	-0.108595	-0.258725
YDR063W		-0.19305	-0.0874494	-0.271947		YDR011W	SNQ2	-0.118955	0.0398201	-0.824269
YDR064W	RPS13	0.435913	-0.115885	0.218989		YDR012W	RPL4B	-0.0980741	0.561266	-0.542238
YDR065W		0.101461	-0.126418	-0.122336		YDR013W		0.342407	0.0877671	-0.153794
YDR066C		0.330131	0.0320445	0.326107		YDR014W	RAD61	0.108161	-0.52043	0.343067
YDR067C		-0.95535	-0.620005	-0.390162		YDR014W-A	HED1	-0.173767	0.136275	-0.914098
YDR068W	DOS2	-0.376149	-0.601643	-0.259499		YDR015C		-0.975738	0.0174078	-1.02603
YDR069C	DOA4	-0.747208	1.38252	0.145257		YDR017C	KCS1	0.447634	0.385449	0.470705
YDR071C	PAA1	-0.0259772	0.0667974	-0.19779		YDR017W	CDC7	-0.0676446	0.377461	-0.391717
YDR072C	IPT1	0.698211	0.623691	0.543984		YDR018C		0.0815732	0.585715	-0.315954
YDR073W	SNF11	0.303094	0.450534	-0.362684		YDR019C	GCV1	-0.377356	0.330562	-0.39249
YDR074W	TPS2	-0.704008	1.80715	1.11898		YDR021W	FAL1	-0.213988	0.478109	-0.126979
YDR075W	PPH3	0.00710572	-0.11536	0.0808895		YDR022C	CIS1	0.14355	0.236096	0.0668118
YDR076W	RAD55	0.172102	-0.22035	0.373202		YDR023W	SES1	0.0807229	0.229547	0.281717
YDR077W	SED1	0.39534	0.620135	0.249315		YDR024W	FYV1	-0.624	-0.141511	-0.731384
YDR078C	SHU2	-0.270686	0.414547	0.213262		YDR025W	RPS11A	-0.384696	-0.411183	-0.736068
YDR079C-A		0.00112372	-0.439892	-1.30785		YDR026C		0.102921	0.60003	0.174699
YDR079W	PET100	0.493571	0.645059	-0.223768		YDR029W		0.142832	0.0893641	0.317708
YDR080W	VPS41	-0.321731	-0.0940955	0.803894		YDR030C	RAD28	-0.19146	-0.0873766	-0.488737
YDR081C	PDC2	-0.842962	0.491446	0.21504		YDR031W		0.582286	0.192246	0.311272
YDR082W	STN1	0.427608	0.301332	0.344457		YDR032C	PST2	0.0934464	0.312306	0.0118073
YDR083W	RRP8	0.42916	0.366124	0.434856		YDR033W	MRH1	0.162931	-0.299061	-0.436266
YDR084C		0.560417	0.632748	0.502944		YDR034C	LYS14	-0.156156	0.0134207	-0.28473
YDR085C	AFR1	-1.00629	0.195042	-0.742731		YDR035W	ARO3	-0.108553	0.421664	0.542374
YDR086C	SSS1	0.574678	-0.300901	-0.109312		YDR036C	MRP5	-0.0057644	0.564025	0.0416057
YDR087C	RRP1	0.0264179	-0.13144	0.0972487		YDR037W	KRS1	-0.328818	0.123637	-0.347844
YDR088C	SLU7	0.0591451	-0.0638181	0.148429		YDR039C	ENA2	0.591366	0.619982	0.634024
YDR091C	RLI1	0.105576	1.11185	0.588905		YDR040C	ENA1	-0.286197	0.472892	-0.107227
YDR092W	UBC13	0.454638	0.428434	0.170856		YDR041W	RSM10	-0.141972	0.245104	-0.0998271
YDR093W	DNF2	0.0772473	0.653826	0.438704		YDR042C		0.00815091	-0.184283	-0.101707
YDR094W		0.253516	0.1414	0.00985049		YDR043C	NRG1	-0.437086	0.3242	-0.304145
YDR095C		-0.467734	0.599497	0.39367		YDR044W	HEM13	-0.000801583	0.39064	-0.125316
YDR096W	GIS1	0.338192	2.10179	1.94798		YDR045C	RPC11	-0.3133	0.0194159	0.0322394
YDR097C	MSH6	-0.625802	1.08619	-7.2801		YDR046C	BAP3	-0.0217437	0.850212	0.682329
YDR098C	GRX3	-0.0507254	0.433191	0.161793		YDR047W	HEM12	0.482825	0.728507	0.686656
YDR099W	BMH2	0.0456264	0.351484	0.173213		YDR048C		-2.02365	-0.394669	0.744311
YDR100W	TVP15	0.0214895	-0.231318	-0.188587		YDR049W		0.12059	0.239018	0.600668
YDR101C		0.0846467	-0.127169	0.180932		YDR050C	TPI1	-0.215515	-0.469099	-0.480817
YDR103W	STE5	-1.05398	0.560354	0.626141		YDR051C		-0.10325	0.296031	-0.269467
YDR108W	GSG1	-0.123931	-0.119588	-0.74405		YDR052C	DBF4	0.186642	0.0606024	-0.261151
YDR109C		-0.619246	-0.778489	0.0139787		YDR053W		0.0706974	0.000801911	-0.155032
YDR110W	FOB1	-0.151952	-0.141184	-0.118648		YDR054C	CDC34	0.209752	0.0637536	0.242186
YDR111C		0.414655	0.360146	0.408181		YDR056C		0.0840745	0.384201	-0.0422114
YDR113C	PDS1	-0.221845	0.00692766	-0.150777		YDR057W	YOS9	0.363236	0.231696	0.0498855
YDR116C	MRPL1	-0.0551683	-0.0566246	-0.207269		YDR058C	TGL2	0.174024	0.436372	-0.00784398
YDR117C		-0.444909	0.401459	-0.34383		YDR059C	UBC5	0.40759	0.514811	0.28306
YDR118W	APC4	0.0168378	-0.23093	-0.124717		YDR060W	MAK21	-0.194877	0.24404	-0.144178
YDR119W		1.08908	1.19575	-1.43328		YDR061W		0.410592	0.265381	0.112523
YDR120C	TRM1	-0.0915797	0.105208	-0.151609		YDR062W	LCB2	0.0568997	0.258467	0.0289469
YDR121W	DPB4	0.107257	-0.0825048	0.0291897		YDR063W		-0.044771	0.219452	0.131335
YDR122W	KIN1	1.25025	1.14148	1.01513		YDR064W	RPS13	0.122867	0.183593	-0.395515
YDR123C	INO2	-0.63177	-0.0684921	0.376678		YDR065W		0.159407	0.459617	-0.288204
YDR124W		-0.151479	0.252928	-0.180319		YDR066C		0.152591	2.99854e-05	-0.034492
YDR125C	ECM18	-0.215791	0.828608	0.727551		YDR067C		0.45142	0.363102	0.198003
YDR126W	SWF1	0.299011	0.116673	-0.0709066		YDR068W	DOS2	0.0186674	1.5233	0.90444
YDR127W	ARO1	-0.177202	0.533808	0.332018		YDR069C	DOA4	0.379286	0.420989	0.670752
YDR128W		-0.731463	0.792089	0.587368		YDR071C	PAA1	-0.454597	-0.130944	-0.201255
YDR129C	SAC6	-0.00921634	0.687801	0.631031		YDR072C	IPT1	0.366434	0.253507	-0.0349358
YDR130C	FIN1	-0.371268	-0.102823	-0.865989		YDR073W	SNF11	0.114042	0.173004	0.0125316
YDR131C		-0.508726	0.0101855	-0.0641999		YDR074W	TPS2	-0.308429	0.283072	1.0462
YDR132C		0.191284	0.721631	0.684875		YDR075W	PPH3	0.0583484	0.138199	-0.00407726
YDR133C		0.0368536	0.123065	-0.626142		YDR076W	RAD55	-0.168218	0.310485	0.0401224
YDR134C		0.300359	0.136743	-0.350629		YDR077W	SED1	0.00148845	0.3865	-0.459686
YDR135C	YCF1	0.842585	0.666407	0.433462		YDR078C	SHU2	0.00843497	0.00700319	0.195929
YDR137W	RGP1	0.225077	-0.0433066	-0.153967		YDR079C-A		0.36193	0.128473	0.177989
YDR138W	HPR1	0.604668	-0.288623	0.391953		YDR079W	PET100	0.254434	-0.0291386	0.474071
YDR140W	FYV9	0.104568	0.0160082	-0.0113191		YDR080W	VPS41	0.0377977	-0.237062	-0.107602
YDR141C	DOP1	0.697426	1.61588	-0.0488797		YDR081C	PDC2	0.0290624	0.274302	0.133832
YDR142C	PEX7	0.125388	0.0306461	-0.0171989		YDR082W	STN1	0.0150746	0.302412	-0.244772
YDR143C	SAN1	0.0947073	0.208346	0.0921645		YDR083W	RRP8	-0.102417	0.348443	-0.462261
YDR144C	MKC7	0.564315	0.710493	0.0889932		YDR084C		0.538411	0.639133	0.547292
YDR145W	TAF12	0.339701	0.535504	0.583126		YDR085C	AFR1	0.112966	0.350927	0.291871
YDR146C	SWI5	-2.88415	-1.48458	-0.303705		YDR086C	SSS1	0.262673	0.0952307	-0.550257
YDR147W	EKI1	0.088041	0.483905	-0.182397		YDR087C	RRP1	0.0819455	-0.0216973	0.036985
YDR148C	KGD2	3.09696	2.94859	2.43163		YDR088C	SLU7	-0.0926645	0.468247	-0.227141
YDR149C		0.0317587	-0.348799	-0.289171		YDR091C	RLI1	-0.320935	0.314503	-0.325156
YDR151C	CTH1	-0.179829	-0.122312	-0.243624		YDR092W	UBC13	0.27315	0.118325	0.180964
YDR152W	GIR2	-0.190254	-0.330695	-0.115561		YDR093W	DNF2	-0.236713	0.301239	0.0561764
YDR153C	ENT5	0.479452	0.464797	0.455676		YDR094W		-0.35003	0.0655334	-0.304295
YDR155C	CPR1	0.204128	-0.0278983	-0.24559		YDR095C		0.20509	0.119645	0.0449038
YDR156W	RPA14	-0.3618	-0.496943	-0.287151		YDR096W	GIS1	0.0395489	0.602003	0.655248
YDR158W	HOM2	0.268267	0.161757	-0.0225616		YDR097C	MSH6	-0.231866	0.567705	0.293673
YDR161W	TCI1	0.972666	0.551063	0.759213		YDR098C	GRX3	0.22015	0.180231	0.445968
YDR162C	NBP2	-0.0917043	-0.193059	-0.0592553		YDR099W	BMH2	-0.323086	0.356008	-0.309531
YDR163W		-0.33625	-0.220835	-0.120749		YDR100W	TVP15	-0.107176	0.0649379	0.228866
YDR164C	SEC1	0.601046	0.618123	0.651728		YDR101C		-0.168584	0.162063	-0.308045
YDR165W	TRM82	0.160481	-1.18207	-0.528028		YDR103W	STE5	-0.44773	-0.53264	0.602952
YDR167W	TAF10	0.152373	0.134597	-0.334082		YDR108W	GSG1	-0.632111	-0.692796	-0.834821
YDR168W	CDC37	0.0719444	0.30023	-0.0460583		YDR109C		0.507167	0.211417	0.571617
YDR169C	STB3	0.187311	0.323632	0.118434		YDR110W	FOB1	0.0370283	0.182287	-0.00804153
YDR171W	HSP42	-0.0789438	0.813098	0.684547		YDR111C		0.0898235	0.726917	-0.223686
YDR172W	SUP35	-0.697586	0.156932	0.18231		YDR113C	PDS1	-0.255187	0.321657	-0.482086
YDR173C	ARG82	0.309841	0.325825	0.100707		YDR116C	MRPL1	-0.11549	0.262504	0.259849
YDR174W	HMO1	0.262223	0.0903637	0.0231515		YDR117C		0.512296	0.843257	-0.533771
YDR175C	RSM24	-0.296064	-0.155016	-0.373632		YDR118W	APC4	0.114167	-0.0142657	0.105226
YDR176W	NGG1	0.467041	0.42422	0.0713879		YDR119W		-0.329153	0.14038	-0.284043
YDR177W	UBC1	1.16557	1.0695	0.362107		YDR120C	TRM1	-0.038339	0.239486	-0.171622
YDR178W	SDH4	-0.301107	0.190749	-0.0422486		YDR121W	DPB4	-0.00966809	0.270136	-0.225027
YDR179C	CSN9	-1.03146	-0.121944	-2.18875		YDR122W	KIN1	-0.362659	0.343906	0.129178
YDR179W-A		0.279083	-0.620102	0.305688		YDR123C	INO2	-0.445713	0.696803	0.435437
YDR182W	CDC1	0.286959	0.737205	0.201175		YDR124W		-0.105596	-0.0596655	0.144716
YDR184C	ATC1	-0.147736	-0.10971	-0.714454		YDR125C	ECM18	0.0381626	0.495144	0.0770368
YDR185C		-0.0569467	0.121841	-0.0558292		YDR126W	SWF1	-0.231273	0.238311	-0.332301
YDR186C		0.10484	0.320231	0.129929		YDR127W	ARO1	-0.576948	0.249448	0.215439
YDR187C		0.324585	-0.00597831	-0.620532		YDR128W		0.0856791	0.236744	-0.14134
YDR188W	CCT6	1.13802	0.801923	0.847612		YDR129C	SAC6	-0.574237	0.529945	0.460828
YDR189W	SLY1	0.333885	0.168098	-0.0955704		YDR130C	FIN1	-0.564487	0.175833	-0.0211663
YDR191W	HST4	-0.0795278	-0.502661	-0.123046		YDR131C		0.182933	0.191505	0.198967
YDR192C	NUP42	0.117161	0.329136	0.53059		YDR132C		0.194719	0.186142	0.595748
YDR193W		-0.967867		-0.461239		YDR133C		-0.452296	0.2555	-0.604412
YDR194C	MSS116	0.525029	0.155627	-0.193511		YDR134C		-0.680873	0.130056	-0.827723
YDR195W	REF2	0.135527	0.359536	0.075548		YDR135C	YCF1	0.23136	1.30363	0.0443732
YDR196C		-0.316471	0.123632	-0.00900377		YDR137W	RGP1	0.112083	0.10726	0.167238
YDR197W	CBS2	0.204555	-0.186032	0.122219		YDR138W	HPR1	0.0558174	0.17372	-0.0389169
YDR198C		0.521663	0.744699	0.610694		YDR139C	RUB1		-1.59575
YDR199W		-1.33291	-0.646935	-2.02798		YDR140W	FYV9	-0.342035	-0.197123	-0.539019
YDR200C	VPS64	-0.611558	-0.229591	-0.0786836		YDR141C	DOP1	-0.0402487	-0.0605393	0.0303234
YDR202C	RAV2	0.314622	0.454244	0.436601		YDR142C	PEX7	0.19354	0.0261136	-0.179406
YDR203W		-0.0387121	0.897579	-0.239091		YDR143C	SAN1	-0.113869	0.0635404	-0.0131737
YDR204W	COQ4	0.25991	0.324749	0.177386		YDR144C	MKC7	-0.511818	0.414919	0.100261
YDR205W	MSC2	-0.295492	-0.200691	-0.00352842		YDR145W	TAF12	0.177355	0.230206	0.100025
YDR207C	UME6	-0.112051	0.252545	0.337089		YDR146C	SWI5	0.272971	-0.400883	-0.41798
YDR209C		-0.38742	-0.188195	0.127664		YDR147W	EKI1	0.0884095	-0.196788	0.000531122
YDR211W	GCD6	-0.723584	-0.322308	-0.169493		YDR148C	KGD2	0.401772	0.835305	0.639447
YDR212W	TCP1	0.708438	0.563733	0.82506		YDR149C		0.477607	0.0884069	0.640445
YDR213W	UPC2		-1.00138			YDR151C	CTH1	-0.298315	-0.0204762	0.510377
YDR214W		0.110679	0.127359	0.0808277		YDR152W	GIR2	0.0623865	0.276954	-0.0386501
YDR215C		-0.106741	0.611678	0.576585		YDR153C	ENT5	0.0612066	0.19986	0.112971
YDR216W	ADR1	0.862652	1.28739	1.5625		YDR155C	CPR1	0.205496	0.185835	-0.171017
YDR217C	RAD9	1.44434	0.555644	1.60386		YDR156W	RPA14	0.0588804	-0.531379	0.129209
YDR218C	SPR28	-0.173811	0.107994	0.154895		YDR158W	HOM2	-0.231241	0.308511	-0.256377
YDR221W		0.301083	0.601014	0.37227		YDR161W	TCI1	0.00452567	0.719431	-0.369923
YDR222W		-0.0813438	-0.184573	-0.266292		YDR162C	NBP2	0.239576	0.228852	0.32893
YDR223W		0.0109441	1.42186	-1.68961		YDR163W		0.0119808	0.3178	-0.166207
YDR224C	HTB1	0.304682	0.0838654	-0.217937		YDR164C	SEC1	-0.204105	0.432088	0.173033
YDR225W	HTA1	0.167573	0.0473078	-0.233001		YDR165W	TRM82	-0.268258	-0.431616	-0.635837
YDR226W	ADK1	0.249181	-0.153128	0.0375647		YDR167W	TAF10	0.186503	-0.0389175	-0.264554
YDR228C	PCF11	-0.0414674	0.721971	-0.129474		YDR168W	CDC37	0.200817	0.139278	0.175259
YDR229W	IVY1	0.396341	0.827599	0.366989		YDR169C	STB3	0.128849	0.381194	-0.311942
YDR232W	HEM1	0.388892	0.0864163	0.232078		YDR171W	HSP42	-0.500875	0.443385	0.940885
YDR233C	RTN1	0.79127	0.347241	0.043421		YDR172W	SUP35	0.233027	0.461265	0.119935
YDR234W	LYS4	-0.179503	0.800652	0.510468		YDR173C	ARG82	-0.109819	0.465857	-0.199958
YDR245W	MNN10	-0.607905		-0.552015		YDR174W	HMO1	0.0191564	0.11313	-0.0152926
YDR246W	TRS23	-0.167656	-0.755669	-0.470763		YDR175C	RSM24	-0.113997	-0.0325128	-0.0221996
YDR248C		0.255099	0.42316	0.424964		YDR176W	NGG1	0.318782	0.267357	0.0110258
YDR249C		0.502892	0.544454	0.371845		YDR177W	UBC1	-0.0184382	0.0720934	-0.600303
YDR253C	MET32	-0.640482	-0.110891	-0.229532		YDR178W	SDH4	-0.377881	0.299826	-0.0996444
YDR255C	RMD5	0.0475559	0.0532821	0.0642063		YDR179C	CSN9	-0.271404	0.0681571	0.0501973
YDR256C	CTA1	0.480612	0.392709	0.284407		YDR179W-A		-0.170484	0.0592056	-0.701691
YDR257C	RMS1	0.601851	0.845341	0.709921		YDR182W	CDC1	0.524765	0.765165	0.113954
YDR259C	YAP6	-0.0507756	0.650707	0.659917		YDR184C	ATC1	-0.268625	-0.244586	0.0768936
YDR260C	SWM1	-0.0919612	-0.0565222	-0.0476749		YDR185C		0.0947458	-0.0890514	0.404355
YDR262W		0.297424	0.174179	-0.203844		YDR186C		0.458638	0.15412	-0.0660352
YDR264C	AKR1	0.013312	-0.139417	0.0267977		YDR187C		0.050537	-0.0878309	0.0768861
YDR265W	PEX10	0.39908	0.381353	0.0922378		YDR188W	CCT6	0.407498	0.413599	0.341591
YDR266C		0.442335	0.300417	0.398031		YDR189W	SLY1	-0.11181	0.0644972	-0.0880578
YDR267C		0.710807	0.688709	0.713197		YDR191W	HST4	-0.114025	0.304463	-0.320155
YDR268W	MSW1	-0.428288	-0.356624	-0.367273		YDR192C	NUP42	0.62267	0.386133	0.485994
YDR270W	CCC2	0.701377	0.977813	0.91496		YDR193W		0.145256	-0.935425	0.0884019
YDR272W	GLO2	0.348985	0.416703	-0.103072		YDR194C	MSS116	0.716317	0.345719	0.449298
YDR273W	DON1	0.498142	0.554706	0.354818		YDR195W	REF2	0.40808	0.730924	0.0720522
YDR274C		0.441214	0.359568	-0.259049		YDR196C		0.110735	0.0880668	0.388714
YDR275W		0.655532	0.269171	-0.340463		YDR197W	CBS2	0.0202485	0.246544	-0.164267
YDR277C	MTH1	2.8427	0.172334	1.03956		YDR198C		0.00854572	0.387079	-0.066391
YDR279W		0.335419	0.0616852	-0.0826863		YDR199W		0.222945	-0.175895	-0.015961
YDR280W	RRP45	0.382184	-0.0797016	0.100393		YDR200C	VPS64	-0.300007	-0.0670499	-0.0254506
YDR281C	PHM6	0.351565	-0.190888	-0.63261		YDR202C	RAV2	0.0848239	0.444057	-0.165952
YDR282C		0.420761	0.720789	0.563045		YDR203W		0.672143	0.156791	0.522102
YDR284C	DPP1	-0.367094	0.476582	-0.00450995		YDR204W	COQ4	-0.143248	0.264867	-0.144054
YDR285W	ZIP1	-0.452869	-0.0139211	0.258113		YDR205W	MSC2	-0.188003	0.145879	-0.29371
YDR286C		-0.030493	1.05742	0.95712		YDR207C	UME6	-0.313852	0.513029	0.496035
YDR288W		0.176702	-0.208162	-0.390366		YDR209C		-0.605746	0.305972	0.138389
YDR289C	RTT103	0.235559	0.576851	0.314299		YDR211W	GCD6	0.0368613	0.0855793	-0.0079213
YDR291W		0.979109	1.07598	0.916993		YDR212W	TCP1	-0.374582	0.356759	0.0330168
YDR292C	SRP101	0.57076	0.799886	0.589558		YDR214W		-0.217805	0.39278	-0.218112
YDR293C	SSD1	-2.68779		-0.428327		YDR215C		-0.937812	0.212045	0.389006
YDR294C	DPL1	0.476594	0.639085	0.262812		YDR216W	ADR1	0.785696	0.0429227	0.427728
YDR295C	PLO2	0.241536	0.475434	0.256193		YDR217C	RAD9	0.0388403	0.279241	0.0681396
YDR297W	SUR2	0.75109	0.748648	0.392299		YDR218C	SPR28	0.384132	0.74755	0.478428
YDR299W	BFR2	0.152533	-0.150541	-0.0447954		YDR219C		2.72827	0.824749	2.86229
YDR300C	PRO1	0.117456	0.318166	0.377432		YDR221W		0.00265398	0.153398	0.231784
YDR302W	GPI11	-0.0442251	-0.405688	0.180017		YDR222W		0.273196	0.130866	-0.02435
YDR304C	CPR5	0.0759019	0.032693	-0.364306		YDR223W		1.32866	0.527578	1.36018
YDR305C	HNT2	-0.330955	-0.997287	-0.414454		YDR224C	HTB1	-0.145993	0.279126	-0.157187
YDR307W		-0.352021	0.293636	-0.0429106		YDR225W	HTA1	-0.370716	0.168565	-0.255937
YDR308C	SRB7	-0.353667	-0.483052	-0.342412		YDR226W	ADK1	-0.0647124	-0.0177484	-0.609654
YDR309C	GIC2	-0.312734	-0.187298	0.0667003		YDR227W	SIR4	1.2524	2.2799	1.66113
YDR310C	SUM1	0.0562212	-0.0698606	-0.0566544		YDR228C	PCF11	0.142147	-0.0114448	0.310335
YDR311W	TFB1	0.16393	0.329572	-0.038382		YDR229W	IVY1	0.064689	0.518678	0.610367
YDR313C	PIB1	-0.324628	-0.302193	-0.762357		YDR232W	HEM1	0.194381	-0.0734079	-0.0622804
YDR314C		0.138043	0.161548	0.401397		YDR233C	RTN1	0.152753	-0.142547	-0.50282
YDR315C	IPK1	-0.0661033	0.209345	-0.666874		YDR234W	LYS4	0.287214	0.51488	0.374616
YDR316W		-0.165201	-0.0904278	-0.104817		YDR241W	BUD26	-1.35935
YDR317W		-0.0670351	0.361757	0.319067		YDR245W	MNN10	-1.10879	-1.15319	-0.971495
YDR318W	MCM21	-0.386054	-0.072966	-0.227506		YDR246W	TRS23	0.0316971	-0.418913	-0.440491
YDR319C		0.331084	0.565499	-0.241894		YDR248C		-0.958312	0.739175	-0.595228
YDR320C	SWA2	-0.0392654	0.661992	0.140123		YDR249C		0.02953	0.294762	-0.241412
YDR320C-A	DAD4	-0.665829	-1.4638	-0.733503		YDR253C	MET32	0.208679	-0.427924	-0.111375
YDR321W	ASP1	0.176646	-0.304995	0.130203		YDR255C	RMD5	0.1086	0.254284	-0.163996
YDR322C-A	TIM11	0.423107	-0.0880517	-0.927289		YDR256C	CTA1	-0.620507	0.410295	0.188399
YDR323C	PEP7	0.13092	0.614846	0.377871		YDR257C	RMS1	0.267956	0.475561	0.200158
YDR324C		0.621605	-1.06463	0.448891		YDR259C	YAP6	-0.155557	0.406953	0.290958
YDR325W	YCG1	0.600793	1.06159	1.00468		YDR260C	SWM1	0.0479317	-0.135693	0.098109
YDR328C	SKP1	-0.27697	-0.468665	-0.211312		YDR262W		-0.243768	0.0110941	0.252226
YDR329C	PEX3	-0.250457	0.491996	0.0038037		YDR264C	AKR1	0.0114839	-0.29233	0.127639
YDR331W	GPI8	0.399404	1.10063	0.957096		YDR265W	PEX10	0.13006	0.493604	-0.46913
YDR332W		-0.042676	1.01552	-0.437551		YDR266C		-0.315796	0.310334	0.115187
YDR333C		-0.22301	-0.332232	0.0848775		YDR267C		0.454294	0.650402	-0.0314672
YDR334W	SWR1	0.0213282	0.704507	0.641432		YDR268W	MSW1	-0.267786	-0.34465	-0.366166
YDR335W	MSN5	-0.638258	0.0685562	-0.313856		YDR270W	CCC2	0.468182	0.512477	0.468588
YDR336W		0.025585	0.040336	0.0251487		YDR272W	GLO2	-0.0655608	0.0310885	0.25851
YDR337W	MRPS28	0.158801	0.129713	-0.278322		YDR273W	DON1	-0.171991	0.450394	-0.429253
YDR338C		1.16585	1.80286	1.21811		YDR274C		0.519434	-0.038922	0.064623
YDR339C		0.0807785	-0.0500395	0.13257		YDR275W		0.43503	-0.106461	0.159002
YDR340W		-0.293007	0.288244	0.544218		YDR277C	MTH1	0.899116	-0.582715	-0.505266
YDR341C		0.249444	-0.098547	0.0743257		YDR279W		-0.286051	0.379702	-0.691893
YDR342C	HXT7	0.871355	0.0969561	0.123008		YDR280W	RRP45	0.329779	0.261443	0.316942
YDR344C		-2.07662	0.919298	-0.305218		YDR281C	PHM6	1.28457	-0.699903	0.557579
YDR345C	HXT3	0.965707	1.26503	0.314717		YDR282C		0.042811	0.424198	0.112081
YDR347W	MRP1	0.127638	0.14181	0.25128		YDR284C	DPP1	-0.0826173	0.273833	0.239647
YDR348C		0.0518928	-0.0505616	-0.256433		YDR285W	ZIP1	-0.0420559	0.412686	0.169196
YDR349C	YPS7	0.376403	1.13415	1.0055		YDR286C		-0.0939347	0.0244121	-0.192307
YDR34C	HXT6	-0.403544	0.356993	-0.00448902		YDR288W		0.165763	-0.23355	0.0352106
YDR350C	TCM10	-0.0838438	0.480308	0.34244		YDR289C	RTT103	-0.118844	0.370895	-0.025798
YDR351W	SBE2	0.282838	0.672539	0.460357		YDR291W		0.342264	0.324353	0.466815
YDR352W		-0.0187131	-0.12345	-0.23487		YDR292C	SRP101	0.207648	0.290705	0.21094
YDR353W	TRR1	0.294137	0.112091	0.165822		YDR293C	SSD1	-0.603991	-1.12354	-2.04835
YDR354W	TRP4	-0.194474	-0.07248	-0.146004		YDR294C	DPL1	-0.327274	-0.17789	0.125175
YDR357C		0.03788	-0.0599214	0.244053		YDR295C	PLO2	-0.0683145	-0.0540604	0.067437
YDR358W	GGA1	-0.404072	0.494542	0.0726661		YDR296W	MHR1	0.349529	-0.119475	-0.0136939
YDR365C		0.231858	-1.25278			YDR297W	SUR2	0.173476	0.323921	-0.198429
YDR366C		0.725219	-0.038989	0.488419		YDR299W	BFR2	-0.230845	0.199944	-0.249682
YDR367W		0.605827	-0.137168	-0.0305265		YDR300C	PRO1	0.128941	0.108116	0.332467
YDR368W	YPR1	0.176453	0.0713669	-0.190662		YDR302W	GPI11	0.0240354	-0.0984894	0.0950836
YDR369C	XRS2	0.167819	0.35021	-0.297689		YDR303C	RSC3	0.0984871	1.37274	1.07372
YDR371W	CTS2	-0.147735	0.205522	0.182714		YDR304C	CPR5	0.0790344	0.135465	-0.329408
YDR372C		0.358468	0.214602	0.165827		YDR305C	HNT2	0.0926611	-0.188715	0.0558949
YDR373W	FRQ1	-0.466748	-0.127546	0.0804361		YDR307W		0.332377	0.344344	0.0487287
YDR374C		0.69515	0.416398	0.253434		YDR308C	SRB7	0.283599	-0.049294	0.288688
YDR375C	BCS1	-0.324844	0.00508748	-0.0980508		YDR309C	GIC2	0.413577	-0.0702162	0.0961372
YDR376W	ARH1	-0.120397	0.166865	-0.126888		YDR310C	SUM1	-0.173228	-0.24425	0.00169465
YDR378C	LSM6	-0.537542	0.168936	-1.11567		YDR311W	TFB1	0.0271861	0.308291	0.342283
YDR379C-A		-0.427725	0.223998	-0.70301		YDR313C	PIB1	-0.751616	-0.209923	0.113926
YDR379W	RGA2	0.0439029	0.111262	-0.0231809		YDR314C		0.0016024	0.516628	0.358782
YDR381C-A		0.00267586	-1.17124	-1.01364		YDR315C	IPK1	-0.398341	0.403235	-0.164635
YDR382W	RPP2B	0.450793	-0.500212	-0.190136		YDR316W		0.0464189	0.223662	0.143336
YDR383C	NKP1	-0.146756	-0.158209	0.028715		YDR317W		-0.0842448	0.340598	-0.0319148
YDR385W	EFT2	1.34588	1.05075	0.815681		YDR318W	MCM21	-0.29514	0.107249	0.093958
YDR386W	MUS81	-0.202002	-0.128195	-0.0586512		YDR319C		-0.366173	0.253022	-0.0544184
YDR387C		0.313988	0.564243	-0.0117436		YDR320C	SWA2	0.33586	0.201925	0.227107
YDR388W	RVS167	0.152301	0.418973	0.519255		YDR320C-A	DAD4	-0.268438	-0.640671	-0.524424
YDR389W	SAC7	-0.492603	-0.301189	0.1896		YDR321W	ASP1	0.090734	0.228778	-0.420218
YDR390C	UBA2	-0.322302	-0.214672	-0.349605		YDR322C-A	TIM11	0.0427472	0.021501	-0.158237
YDR391C		0.211613	0.193983	0.520013		YDR323C	PEP7	-0.144125	0.361135	-0.250352
YDR392W	SPT3	0.180712	0.101152	0.0443757		YDR324C		0.460621	-0.0815408	-0.460649
YDR393W	SHE9	-0.599103	-0.108922	-0.446107		YDR325W	YCG1	0.412612	0.540575	0.702101
YDR397C	NCB2	0.00572543	-0.394846	-0.0133099		YDR326C		2.60653	2.93951	1.62245
YDR398W	UTP5	0.272747	-0.547981	0.133063		YDR328C	SKP1	-0.0510332	-0.123722	-0.280645
YDR399W	HPT1	-0.563414	-1.10925	-0.216515		YDR329C	PEX3	0.125436	0.0662414	-0.446726
YDR400W	URH1	0.258839	-0.503229	-0.519981		YDR331W	GPI8	1.14416	1.09769	0.933467
YDR403W	DIT1	0.131225	0.381476	0.464606		YDR332W		0.419001	0.590122	0.0954814
YDR404C	RPB7	-0.0635289	0.519565	0.175697		YDR333C		0.306587	0.314309	0.0608399
YDR405W	MRP20	-0.170188	0.173594	-0.210322		YDR334W	SWR1	-0.237371	0.461902	0.181294
YDR406W	PDR15	-0.16969	1.45093	0.89056		YDR335W	MSN5	0.180302	0.367409	-0.0988979
YDR407C	TRS120	-0.868737	-0.212058	-0.262366		YDR336W		0.0507242	0.19077	0.0642045
YDR408C	ADE8	-0.24654	-0.678356	-0.0620334		YDR337W	MRPS28	-0.342436	0.0924021	0.154447
YDR410C	STE14	0.643865	-0.0725178	0.0674181		YDR338C		-0.975484	0.42256	0.269009
YDR411C		0.34228	0.164507	-0.10038		YDR339C		-0.131572	-0.0341433	-0.0316238
YDR414C	ERD1	0.148616	0.221524	0.155592		YDR340W		-0.269217	-0.107178	-0.0830928
YDR415C		0.196673	0.0649684	0.243286		YDR341C		-0.228036	0.113534	-0.0811063
YDR417C		0.427421	-0.361643	-0.156151		YDR342C	HXT7	0.43881	0.411234	0.101153
YDR418W	RPL12B	0.278253	-0.243961	0.0759543		YDR344C		-0.169924	-1.34263	-0.88256
YDR420W	HKR1	-0.49499	0.611958	0.536361		YDR345C	HXT3	0.286516	0.00996499	0.279863
YDR422C	SIP1	-0.00809043	0.156324	0.128195		YDR347W	MRP1	0.0344663	0.165159	0.0339474
YDR423C	CAD1	-0.0913276	-0.0613176	-0.0819538		YDR348C		0.35894	0.161367	0.0304908
YDR424C	DYN2	-0.28067	-0.0457336	-0.486619		YDR349C	YPS7	-0.437844	0.616238	0.0897936
YDR425W	SNX41	-0.00373796	0.596863	-0.0360656		YDR34C	HXT6	0.574073	0.195409	0.437638
YDR427W	RPN9	0.00298565	-0.0464373	-0.202728		YDR350C	TCM10	-0.254051	0.345562	0.00611583
YDR428C		-0.214628	-0.288759	-0.540445		YDR351W	SBE2	0.419685	0.449275	-0.178647
YDR429C	TIF35	0.394374	-0.220532	0.0259198		YDR352W		0.27141	-0.0501374	0.382971
YDR430C	CYM1	0.0482061	0.370595	-0.037815		YDR353W	TRR1	-0.0680174	-0.314315	-0.288235
YDR432W	NPL3	-0.166175	0.33395	0.17529		YDR354W	TRP4	-0.232813	0.285272	-0.131826
YDR435C	PPM1	-0.0201463	0.0355868	0.0597457		YDR357C		-0.0170675	-0.0449008	-0.44507
YDR437W		0.349784	0.665764	0.497377		YDR358W	GGA1	-0.0332164	0.729964	0.568614
YDR438W	THI74	-0.221159	-0.0683098	-0.111619		YDR360W		-0.0559641	-0.257894	-0.699708
YDR439W	LRS4	0.0704091	0.204486	0.273081		YDR363W	ESC2	1.18521	-1.91235	1.18719
YDR441C	APT2	0.106654	-0.0525269	-0.00555747		YDR364C	CDC40	2.01047	0.717369	1.38099
YDR443C	SSN2	0.234641	1.42588	1.40497		YDR365C		-0.0730623	0.292748	0.201617
YDR444W		0.410576	-0.630508	0.111379		YDR366C		-0.488741	0.00969012	-0.0387038
YDR447C	RPS17B	0.0186841	-0.678046	-0.187697		YDR367W		0.0578583	0.168468	-0.21576
YDR450W	RPS18A	0.466771	-0.154595	0.306961		YDR368W	YPR1	0.00495806	0.239866	-0.458828
YDR451C	YHP1	0.426248	-0.278822	0.0557641		YDR369C	XRS2	-0.00159652	0.265892	-0.243344
YDR452W	PPN1	-2.03736	0.916805	-0.0445374		YDR371W	CTS2	0.228982	0.433557	0.0698175
YDR453C	TSA2	-0.384745	0.0422113	0.73024		YDR372C		-0.148022	0.465753	-0.404543
YDR454C	GUK1	0.484795	-0.203209	0.0291725		YDR373W	FRQ1	-0.375018	-0.0381032	-0.0122026
YDR456W	NHX1	0.100855	1.2595	-0.235813		YDR374C		-0.0872011	0.14064	-0.756698
YDR458C		-0.0308084	0.0891159	-0.151469		YDR375C	BCS1	0.148189	0.328588	0.448199
YDR459C		0.0452704	-0.161501	-0.259939		YDR376W	ARH1	-0.0317108	0.216377	-0.162569
YDR460W	TFB3	0.121447	-0.461321	-0.119624		YDR378C	LSM6	-0.0156885	0.081057	-0.0759542
YDR462W	MRPL28	0.151453	0.207994	-0.167805		YDR379C-A		0.137649	0.160707	0.775785
YDR463W	STP1	0.0275532	0.0287806	-0.893805		YDR379W	RGA2	-0.154221	0.0311184	0.00349308
YDR465C	RMT2	-0.342491	-2.13985	-0.26462		YDR380W	ARO10	1.01957	-0.147937	-0.239841
YDR468C	TLG1	-0.156947	0.146228	-0.0237502		YDR381C-A		0.381488	-0.293014	-0.0516746
YDR469W	SDC1	-0.275048	0.110549	-0.657636		YDR382W	RPP2B	-0.428627	-0.140765	-0.871625
YDR470C	UGO1	-0.0615859	0.219554	0.212006		YDR383C	NKP1	0.0135079	0.0566243	-0.297858
YDR471W	RPL27B	0.0398869	-0.536604	-0.25486		YDR385W	EFT2	0.289079	1.08257	-0.112257
YDR472W	TRS31	-0.00627638	-0.551205	-0.272763		YDR386W	MUS81	0.38814	0.326182	0.340791
YDR474C		0.62293	0.993295	0.451589		YDR387C		-0.265735	0.19557	0.126642
YDR475C	JIP4	0.194699	0.98829	-0.130951		YDR388W	RVS167	-0.13385	0.391923	0.283238
YDR476C		0.140836	0.0748383	0.113862		YDR389W	SAC7	0.125928	0.0891175	0.195867
YDR478W	SNM1	0.292088	0.343628	0.268994		YDR390C	UBA2	0.0484771	0.0835735	0.192949
YDR480W	DIG2	-0.218534	0.274152	-0.124524		YDR391C		0.326479	-0.293993	0.346124
YDR481C	PHO8	0.326674	0.530915	-0.190167		YDR392W	SPT3	-0.0741446	0.117883	-0.502555
YDR482C	CWC21	-0.103307	-0.0539319	0.151186		YDR393W	SHE9	-0.220223	-0.0147669	-0.440551
YDR483W	KRE2	-0.72902	-0.305272	1.13482		YDR397C	NCB2	-0.167029	-0.245029	0.0604012
YDR484W	SAC2	0.254919	0.242112	0.154395		YDR398W	UTP5	0.209472	-0.127966	-0.238108
YDR485C	VPS72	0.259613	-0.187993	0.446436		YDR399W	HPT1	-0.117143	-0.46826	-0.247385
YDR486C	VPS60	-0.36635	0.115529	-0.0461171		YDR400W	URH1	-0.0899848	0.105553	-0.191829
YDR487C	RIB3	0.186242	0.10818	-0.124788		YDR403W	DIT1	-0.0499677	0.475562	-0.0158789
YDR488C	PAC11	0.113315	0.0420371	-0.181827		YDR404C	RPB7	-0.562832	-0.197326	-0.142864
YDR490C	PKH1	-0.362559	0.270152	0.673522		YDR405W	MRP20	0.392599	0.379776	-0.00984996
YDR492W		0.230883	-0.0387928	-0.31411		YDR406W	PDR15	0.159279	0.592707	0.200087
YDR493W		-0.823233	-0.0500594	-0.490768		YDR407C	TRS120	-0.775042	0.172427	-0.350419
YDR494W	RSM28	0.248262	0.422253	0.207747		YDR408C	ADE8	0.0499132	-0.0329619	-0.2183
YDR495C	VPS3	0.176053	0.95339	-0.122513		YDR410C	STE14	0.032229	-0.503335	-0.625918
YDR496C	PUF6	0.141703	-0.857163	-0.129167		YDR411C		0.0439251	0.254338	-0.492997
YDR497C	ITR1	-0.22647	-0.150188	-0.109827		YDR414C	ERD1	0.107339	0.468713	-0.201675
YDR498C	SEC20	-0.18933	-0.133077	-0.121247		YDR415C		-0.292657	0.248355	-0.649411
YDR500C	RPL37B	0.336155	-0.160079	0.124697		YDR416W	SYF1	0.622289	0.496313	-1.08934
YDR501W	PLM2	0.514389	0.147986	0.0968283		YDR417C		-0.315272	0.336108	-0.855146
YDR502C	SAM2	-0.178005	-0.341531	-0.215191		YDR418W	RPL12B	-0.488618	0.0814154	-0.503102
YDR503C	LPP1	-0.23986	0.0817833	-0.248988		YDR420W	HKR1	0.0286955	0.0081865	0.266292
YDR507C	GIN4	0.0270309	0.350801	0.371654		YDR422C	SIP1	0.536939	0.452676	0.127995
YDR508C	GNP1	-0.0106999	-0.750431	-0.468187		YDR423C	CAD1	-0.305016	0.0720764	-0.137305
YDR509W		0.982789	1.06814	-0.0543797		YDR424C	DYN2	-0.253589	0.281936	-0.203721
YDR510W	SMT3	-0.333867	-0.0722721	-0.624839		YDR425W	SNX41	-0.324775	0.356484	-0.161448
YDR511W	ACN9	0.0200936	-0.0270326	-0.01774		YDR427W	RPN9	-0.0288496	0.174531	0.0859065
YDR512C	EMI1	-0.077559	0.415997	-0.809823		YDR428C		0.0392954	-0.168661	0.0189123
YDR513W	GRX2	0.0547067	0.217647	-0.305285		YDR429C	TIF35	0.148896	-0.121073	0.0130969
YDR514C		0.265939	0.438154	0.526003		YDR430C	CYM1	-0.137178	0.041308	0.041733
YDR516C	EMI2	-0.739149	-0.09083	-0.695851		YDR432W	NPL3	-0.260736	0.0797075	0.0382964
YDR517W	GRH1	-0.194006	-0.109162	-0.439747		YDR435C	PPM1	-0.38047	0.319034	-0.536934
YDR518W	EUG1	-0.426184	0.0125258	-0.384136		YDR437W		0.619728	0.253575	0.208077
YDR519W	FPR2	-0.130481	0.0307696	-0.322866		YDR438W	THI74	-0.12172	0.146189	-0.375095
YDR520C		-1.90758	-0.171192	0.105383		YDR439W	LRS4	0.0317612	0.268182	-0.196765
YDR522C	SPS2	0.164708	0.263535	0.156222		YDR441C	APT2	-0.11422	-0.413776	-0.330692
YDR526C		0.371706	0.121327	0.310006		YDR443C	SSN2	-0.01283	0.0540205	-0.512979
YDR527W		-0.464429	-0.145941	-0.59944		YDR444W		-0.255252	0.0193875	-0.208276
YDR528W	HLR1	0.0277427	0.266847	0.113476		YDR447C	RPS17B	-0.389481	-0.206349	-0.799071
YDR529C	QCR7	0.158953	-0.0338059	-0.560872		YDR450W	RPS18A	-0.385115	0.0135649	-0.344412
YDR530C	APA2	-0.135963	-0.135427	-0.245145		YDR451C	YHP1	-0.0944946	0.25043	-0.483168
YDR531W		-0.0273225	0.251185	0.0555361		YDR452W	PPN1	0.648415	0.208589	0.750434
YDR532C	KRE28	-0.0546158	0.107821	0.0686311		YDR453C	TSA2	0.337075	0.579332	-0.47498
YDR533C		0.485544	0.769423	-0.0962019		YDR454C	GUK1	-0.267384	-0.0287528	-0.0840648
YDR536W	STL1	0.553734	1.22394	0.871488		YDR456W	NHX1	0.512174	0.230443	0.684669
YDR539W		-0.134025	0.0122083	-0.201564		YDR458C		0.142812	0.00267409	0.187149
YDR541C		-0.400309	0.0539833	0.0610469		YDR459C		-0.237594	0.33147	-0.788727
YEL077C		1.30986	1.11081	1.2285		YDR460W	TFB3	0.273457	-0.575246	-0.14285
YEL073C		-0.773404	0.443508	0.246735		YDR462W	MRPL28	0.067912	0.187967	0.459
YEL072W	RMD6	-1.68006	0.0770724	-0.981386		YDR463W	STP1	0.239155	0.381969	0.119774
YEL071W	DLD3	0.917214	0.639587	-0.0626243		YDR465C	RMT2	-0.220757	-0.375007	-0.828121
YEL069C	HXT13	-2.14848	0.397692	0.215987		YDR468C	TLG1	-0.172297	0.136674	-0.121721
YEL066W	HPA3	-1.01059	-0.77724	-1.40325		YDR469W	SDC1	-0.203113	0.00473927	-0.412739
YEL064C		0.648061	0.665788	0.394363		YDR470C	UGO1	-0.260317	-0.167952	-0.230337
YEL063C	CAN1	-0.132579	-0.269163	-0.75797		YDR471W	RPL27B	-0.349	-0.0754707	-0.503011
YEL061C	CIN8	0.359084	0.568187	0.194796		YDR472W	TRS31	0.0950482	0.0781637	0.0552994
YEL059C-A	SOM1	-0.412693	-0.549222	-0.0826383		YDR474C		-0.0671145	0.203662	0.836559
YEL058W	PCM1	-0.654247	0.038238	-0.15321		YDR475C	JIP4	-0.212743	-0.509461	0.260211
YEL057C		0.55974	0.391186	-0.627716		YDR476C		-0.132197	-0.267219	0.363737
YEL056W	HAT2	0.966965	1.62835	1.57716		YDR478W	SNM1	0.0601992	0.0619933	-0.114089
YEL055C	POL5	0.00949145	-0.290226	-0.288004		YDR480W	DIG2	0.0820463	-0.306647	0.14658
YEL054C	RPL12A	0.432816	-0.605754	-0.0755099		YDR481C	PHO8	-0.0629874	0.229435	-0.10011
YEL053C	MAK10	-1.21031	-1.35652	-0.863619		YDR482C	CWC21	-0.117488	-0.060234	-0.310851
YEL052W	AFG1	-0.141608	0.024768	0.0184688		YDR483W	KRE2	0.175568	0.150354	0.264766
YEL051W	VMA8	-0.0446533	0.220797	-0.0706163		YDR484W	SAC2	0.14888	-0.0647884	0.119668
YEL050C	RML2	0.44278	0.247941	-0.184012		YDR485C	VPS72	0.051772	0.116264	-0.0795682
YEL049W	PAU2	0.00564302	-0.0699691	-0.220086		YDR486C	VPS60	-0.00757124	0.0544932	0.0226157
YEL047C		0.295627	0.0398504	-0.10615		YDR487C	RIB3	-0.198604	-0.181856	-0.422884
YEL046C	GLY1	1.09613	0.335826	0.589033		YDR488C	PAC11	-0.139946	0.15427	-0.52192
YEL042W	GDA1	-0.223995	-0.616711	-0.706731		YDR490C	PKH1	2.45994	0.329044	0.404351
YEL041W		-0.351863	0.0341623	0.0164775		YDR492W		0.299147	-0.285638	-0.294205
YEL040W	UTR2	-0.498402	-0.127525	0.0464358		YDR493W		-0.0219656	-0.0942076	0.116858
YEL039C	CYC7	-1.24574	-0.881419	-0.641266		YDR494W	RSM28	-0.231608	0.0384287	0.0731408
YEL038W	UTR4	-0.112858	0.146041	-0.525026		YDR495C	VPS3	0.0725387	0.116861	-0.0157379
YEL037C	RAD23	0.881541	0.25574	0.546862		YDR496C	PUF6	0.0702209	-0.228208	-0.147332
YEL036C	ANP1	0.0305591	-0.356973	-0.0276047		YDR497C	ITR1	0.157668	0.325284	0.0202678
YEL035C	UTR5	0.326635	-0.0487965	0.0216802		YDR498C	SEC20	-0.45561	0.178733	-0.593205
YEL034W	HYP2	0.16688		-0.952602		YDR500C	RPL37B	-0.134979	0.206619	-0.363664
YEL033W		0.489978	-0.459665	0.0370652		YDR501W	PLM2	0.0871443	0.485666	-0.453566
YEL032W	MCM3	-0.117495	-0.172146	-0.237271		YDR502C	SAM2	-0.584976	0.485797	-0.51514
YEL030C-A		0.0274011	0.0252651	-0.163337		YDR503C	LPP1	-0.157389	0.361222	0.364805
YEL029C	BUD16	0.181438	-0.0148676	-0.369141		YDR504C	SPG3	-0.769018	-0.864818	-0.495473
YEL028W		0.343602	0.671276	0.50839		YDR507C	GIN4	0.163119	0.411844	-0.0359498
YEL027W	CUP5	-0.675041	-2.76411	-0.575248		YDR508C	GNP1	-0.126296	-0.000397365	-0.235299
YEL026W	SNU13	-0.135829	-1.38198	-1.15742		YDR509W		0.838512	0.157213	0.0593415
YEL025C	SRI1	1.44742	0.792333	1.13121		YDR510W	SMT3	-0.285973	-0.0956985	-0.354456
YEL024W	RIP1	0.59958	-0.0988072	-0.716736		YDR511W	ACN9	0.417153	-0.109433	0.0448913
YEL022W	GEA2	1.57882	1.25004	1.10607		YDR512C	EMI1	-0.150244	-0.0425172	-0.196152
YEL021W	URA3	0.0173689	1.34752	1.7873		YDR513W	GRX2	0.823254	0.185815	0.193432
YEL020C		0.171435	0.0705601	0.0734131		YDR514C		-0.516789	0.361427	0.0141308
YEL019C	MMS21	-0.443151	-0.147842	-0.388472		YDR516C	EMI2	0.364305	0.156487	0.465641
YEL018W	EAF5	-0.120483	0.412052	0.0666631		YDR517W	GRH1	-0.556688	0.0845483	-0.36422
YEL017W	GTT3	0.458186	0.257986	-0.361287		YDR518W	EUG1	0.0961491	0.0692141	-0.145641
YEL016C		0.29685	0.0448475	-0.204436		YDR519W	FPR2	0.258779	-0.0261386	0.215742
YEL015W	DCP3	-0.211461	-0.319683	-0.242143		YDR520C		-0.602937	-0.224074	-0.253736
YEL014C		0.0198371	0.148825	-0.943176		YDR522C	SPS2	-0.0360914	0.376383	-0.319795
YEL013W	VAC8	-0.00593289	0.621267	0.246523		YDR526C		0.0547177	-0.642535	-0.0708332
YEL012W	UBC8	-0.409135	-0.796047	-0.915301		YDR527W		0.650411	-0.091165	0.2773
YEL009C	GCN4	0.413513	-0.134951	-0.233225		YDR528W	HLR1	0.109263	0.263222	-0.378948
YEL008W		0.589984	-0.0489739	-0.0842046		YDR529C	QCR7	0.660683	0.259542	0.178532
YEL006W	YEA6	0.172943	-0.144832	-0.323223		YDR530C	APA2	-0.0497799	-0.117716	0.170091
YEL005C	VAB2	0.0088412	0.0304762	-0.149075		YDR531W		-0.194049	0.262102	-0.484326
YEL004W	YEA4	1.06637	1.09093	0.760474		YDR532C	KRE28	-0.395283	0.258622	-0.435745
YEL003W	GIM4	0.223248	-0.622172	-0.692697		YDR533C		-1.3356	0.386515	0.320897
YEL002C	WBP1	-0.11267	-0.0841454	-0.265286		YDR536W	STL1	0.0297763	-0.141533	0.34571
YER002W	NOP16	-0.05198	-1.38824	-0.6583		YDR539W		0.303962	-0.0105708	0.0598487
YER003C	PMI40	0.117204	0.0443573	-0.316692		YDR541C		-0.0599137	0.175503	-0.0436126
YER004W		0.48373	0.0404168	0.0659685		YEL077C		-0.0353255	0.435281	0.404252
YER006W	NUG1	-0.155548	-0.884329	-0.154469		YEL073C		-0.693068	0.646526	0.104578
YER007C-A		1.29958	-0.711503	-1.26876		YEL072W	RMD6	-0.370109	-0.00200439	-0.312826
YER007W	PAC2	-0.130401	-0.574838	-0.046355		YEL071W	DLD3	-0.473884	0.520005	-0.0763194
YER008C	SEC3	-0.135447	-0.324386	-0.146736		YEL070W		0.814672	1.53145	-0.0524868
YER009W	NTF2	0.821567	-0.16501	0.00223736		YEL069C	HXT13	0.0365104	0.295783	0.208559
YER010C		-0.273908	-0.864483	-0.321274		YEL066W	HPA3	-0.587987	0.0128456	-0.709278
YER011W	TIR1	-1.10791	0.685491	0.201377		YEL064C		-0.0877744	0.225644	-0.204954
YER012W	PRE1	0.0503732	0.00193748	-0.214532		YEL063C	CAN1	0.323604	0.27812	0.191123
YER013W	PRP22	-0.14605	0.255946	0.375318		YEL061C	CIN8	-0.355435	0.0740253	0.220997
YER015W	FAA2	0.94216	1.21807	1.05906		YEL059C-A	SOM1	-0.442885	-0.287846	-0.870614
YER016W	BIM1	0.134034	0.156537	0.0227873		YEL058W	PCM1	0.164788	0.540835	0.289148
YER017C	AFG3	0.677667	0.206388	0.450866		YEL057C		-0.0763767	-0.052391	0.201129
YER018C	SPC25	0.519107	0.141767	0.181712		YEL056W	HAT2	1.6335	1.96314	1.53088
YER019C-A	SBH2	0.298356	0.31283	0.358644		YEL055C	POL5	-0.108873	0.194678	-0.474948
YER019W	ISC1	0.517137	0.427906	0.308575		YEL054C	RPL12A	-1.01359	-0.404699	-1.0875
YER020W	GPA2	-0.00169362	-0.0139975	0.539487		YEL053W-A		-2.13253
YER021W	RPN3	-0.897832	0.216496	-0.275296		YEL053C	MAK10	0.721921	0.675258	0.438327
YER022W	SRB4	-0.310652	-0.759658	-0.901645		YEL052W	AFG1	0.0492438	0.931491	0.116575
YER023W	PRO3	-0.10579	0.123952	0.133862		YEL051W	VMA8	0.125459	0.678595	0.228974
YER025W	GCD11	0.0564167	-0.418416	-0.486282		YEL050C	RML2	0.315253	0.639558	0.306583
YER027C	GAL83	-0.133349	-0.143314	-0.0445692		YEL049W	PAU2	-0.2108	-0.186916	0.226747
YER028C	MIG3	0.269774	0.360754	0.441218		YEL047C		0.0709701	0.330141	-0.144213
YER029C	SMB1	-0.188736	0.0623732	-0.298269		YEL046C	GLY1	0.132234	0.188227	-0.234881
YER030W		-0.447961	-0.277296	-0.28455		YEL042W	GDA1	0.116459	0.400747	-0.499935
YER031C	YPT31	-0.295977	-0.947179	-0.705381		YEL041W		-0.20536	0.570721	-0.325067
YER032W	FIR1	-0.827817		-1.60814		YEL040W	UTR2	-0.429527	0.597675	-0.243389
YER033C	ZRG8	-1.06333	0.0966012	-0.0330162		YEL039C	CYC7	-0.328931	0.323175	-1.1155
YER034W		-0.120002	0.0333406	-0.161172		YEL038W	UTR4	-0.52615	0.0934889	-0.435539
YER035W	EDC2	0.16632	-0.27849	-0.494998		YEL037C	RAD23	0.292715	0.666973	0.272553
YER036C	KRE30	0.349052	-0.23694	0.0739802		YEL036C	ANP1	0.0601576	0.238854	-0.166741
YER037W	PHM8	2.10586	1.48423	0.308073		YEL035C	UTR5	-0.215601	0.357429	-0.245699
YER038C	KRE29	0.172466	0.368399	0.0646713		YEL034W	HYP2	-1.21629	-0.634303	-0.30426
YER039C	HVG1	-0.148412	-0.563424	-0.368528		YEL033W		-0.783424	-0.212581	-0.593033
YER039C-A		-1.29457	-1.94463	-0.661363		YEL032W	MCM3	-0.0331248	0.169036	-0.227768
YER041W	YEN1	0.259511	-0.665935	-0.860398		YEL030C-A		-0.112225	0.623225	-0.378455
YER042W	MXR1	-1.55702	-0.927034	-0.856715		YEL029C	BUD16	0.311142	0.739219	-0.272454
YER043C	SAH1	0.188749	-0.349185	-0.0653042		YEL028W		0.0230742	0.125166	0.0156215
YER044C	ERG28	0.0520086	0.276855	-0.765787		YEL027W	CUP5	-0.698809	0.501036	-1.52816
YER045C	ACA1	-0.237822	0.206922	-0.119798		YEL026W	SNU13	-0.547666	0.239367	-1.22194
YER046W	SPO73	-0.454733	-2.79796	-0.16126		YEL025C	SRI1	-0.0185919	0.453302	-0.578901
YER048C	CAJ1	0.242295	0.295001	0.0232403		YEL024W	RIP1	0.0657948	0.318548	-0.354123
YER050C	RSM18	-0.213024	-0.174225	-0.724731		YEL022W	GEA2	-0.0738773	0.0148896	-0.503902
YER052C	HOM3	-0.10092	-0.162128	-0.591592		YEL021W	URA3	0.412863	1.98133	1.64462
YER053C		1.4136	0.965152	-0.143027		YEL020C		0.164365	0.298442	0.0970221
YER054C	GIP2	1.61053	0.719866	-0.0744667		YEL019C	MMS21	0.809232	0.583945	0.320117
YER055C	HIS1	0.0186589	-0.288591	-0.226683		YEL018W	EAF5	-0.0975101	0.371504	-0.176326
YER056C	FCY2	0.437166	-0.592767	-0.144285		YEL017W	GTT3	-0.307793	-0.00828861	-0.437793
YER056C-A	RPL34A	0.319015	-0.188184	0.180723		YEL016C		0.316044	0.29773	0.111094
YER057C	HMF1	-0.853042	-0.553685	-1.22268		YEL015W	DCP3	0.207293	0.516291	-0.0448092
YER060W	FCY21	0.242636	0.231923	-0.196115		YEL014C		-0.10636	0.505045	-0.529988
YER061C	CEM1	-0.308434	-0.306407	-0.221194		YEL013W	VAC8	-0.0305197	0.779059	0.256506
YER062C	HOR2	1.79279	1.64014	0.452381		YEL012W	UBC8	0.692201	0.419251	0.352391
YER063W	THO1	0.0594978	0.215197	-0.0904992		YEL009C	GCN4	-0.100263	-0.132362	-0.431211
YER064C		-0.64694	-0.506451	-0.410353		YEL008W		-0.243121	-0.539446	-0.645298
YER065C	ICL1	-0.0982918	-0.461963	-0.620554		YEL006W	YEA6	0.112804	0.639483	0.145824
YER066W		-0.436579	0.127044	-2.07794		YEL005C	VAB2	-0.196985	0.521759	-0.14814
YER067W		0.0158903	0.926312	-0.473727		YEL004W	YEA4	0.309033	1.10876	0.190888
YER068W	MOT2	-1.43654		-1.43749		YEL003W	GIM4	-0.933178	-0.0697497	-0.54055
YER071C		0.446305	0.777016	0.0175811		YEL002C	WBP1	0.553274	0.621933	0.242604
YER072W	VTC1	0.384335	-0.425577	-0.503499		YEL001C		0.182422	0.219736	-0.220067
YER073W	ALD5	0.160299	0.0391373	-0.0100918		YER002W	NOP16	-0.404475	-0.554228	-0.659039
YER074W	RPS24A	0.777272	0.0581403	0.392068		YER003C	PMI40	0.293987	0.108638	0.170421
YER075C	PTP3	0.120205	-0.433193	-0.768589		YER004W		-0.369875	-0.225955	-0.308977
YER076C		-0.0777956	0.046212	-0.276268		YER006W	NUG1	0.154122	0.231479	-0.136536
YER076W-A		-0.227595	-0.0469219	-0.455229		YER007C-A		-0.67326	0.264168	-1.41925
YER077C		-4.23955	-0.930262	-0.452995		YER007W	PAC2	-0.0429722	0.231133	-0.0389432
YER078C		-1.82297	0.307907	-0.474772		YER008C	SEC3	-0.629604	0.174436	-0.252024
YER079W		0.130023	0.292257	-0.0681144		YER009W	NTF2	-0.856575	0.309622	-1.21275
YER081W	SER3	-0.143004	-0.180371	-0.764794		YER010C		-0.63314	-0.507626	-0.371247
YER082C	UTP7	-0.345589	-0.468705	-0.00677809		YER011W	TIR1	0.601771	0.99549	-0.166735
YER083C	RMD7	-0.662022	-0.537765	0.203022		YER012W	PRE1	-0.0515449	0.429022	-0.215081
YER084W-A		-1.01268	-0.133846	-0.798615		YER013W	PRP22	0.341079	0.567999	0.125349
YER087W		-0.289846	-0.000573034	-0.137957		YER014W	HEM14		1.7017
YER089C	PTC2	0.146089	0.0659253	-0.178038		YER015W	FAA2	0.403005	-0.252084	-0.292323
YER090W	TRP2	-1.74981	-0.12383	-1.08931		YER016W	BIM1	0.852196	1.18564	0.597909
YER092W	IES5	-0.708397	0.145115	-0.886011		YER017C	AFG3	-0.457431	-0.235021	-0.0654586
YER093C		0.940737	0.860699	0.852736		YER018C	SPC25	-0.516869	0.130115	-0.0635661
YER094C	PUP3	0.0525565	0.136988	0.361894		YER019C-A	SBH2	-0.66862	0.0634753	-0.306109
YER095W	RAD51	0.136236	-0.509726	-0.435435		YER019W	ISC1	0.0337668	0.403513	-0.0401568
YER098W	UBP9	-0.37814	0.59849	-0.0842341		YER020W	GPA2	-0.430397	0.701407	0.0233451
YER099C	PRS2	-0.00758708	1.09194	0.0158887		YER021W	RPN3	-1.38394	0.630934	-0.430786
YER100W	UBC6	0.231268	0.520044	0.145887		YER022W	SRB4	0.245895	0.857148	0.046192
YER101C	AST2	-0.26812	0.221729	-0.429356		YER023W	PRO3	-0.10076	0.408554	0.0133057
YER102W	RPS8B	0.313124	-0.598222	-0.163379		YER025W	GCD11	0.0205212	0.341094	-0.404189
YER104W	RTT105	0.359225	-0.419857			YER027C	GAL83	0.355865	0.312775	0.251381
YER105C	NUP157	-0.290877	-0.473269	-0.919499		YER028C	MIG3	0.199836	0.658344	0.287368
YER107C	GLE2	0.0923429	-0.0512523	-0.18668		YER029C	SMB1	-0.376157	0.0987677	-0.173588
YER109C	FLO8	0.637919	0.920181	0.777348		YER030W		0.178147	0.648539	0.573608
YER110C	KAP123	-0.01893	-0.214277	-0.02454		YER031C	YPT31	-0.761655	-0.512761	-0.594955
YER111C	SWI4	0.288481	-2.91929	-0.789418		YER032W	FIR1	-0.233545	-0.214924	-2.09887
YER112W	LSM4	0.556762	0.127312	-0.831719		YER033C	ZRG8	0.0665787	0.71667	-0.233112
YER113C		0.480891	-0.320144	-0.157007		YER034W		-0.796268	0.157372	-0.0399649
YER114C	BOI2	-0.659447	-0.123618	-0.448192		YER035W	EDC2	-0.231037	0.315904	0.341834
YER115C	SPR6	0.222515	-0.655816	-0.206596		YER036C	KRE30	0.0351111	0.288481	-0.102126
YER116C	SLX8	-0.335737	0.0352143	-0.215817		YER037W	PHM8	0.660489	0.246749	0.473323
YER117W	RPL23B	0.45725	0.00646276	0.283125		YER038C	KRE29	0.365994	0.300422	0.0389901
YER119C	AVT6	-0.763554	-0.876877	-0.766051		YER039C	HVG1	0.579405	0.880792	0.455251
YER120W	SCS2	0.313982	0.00233218	-0.0422318		YER039C-A		-1.01251	-0.112208	-1.53639
YER121W		-0.681531	0.162107	-1.3822		YER041W	YEN1	-0.678614	-0.0388483	-0.955481
YER123W	YCK3	-0.115675	-0.379278	-0.492816		YER042W	MXR1	-1.26504	-0.464819	-1.0135
YER124C	DSE1	0.969948	0.781806	-0.249928		YER043C	SAH1	-0.470826	0.302328	-0.668226
YER126C	NSA2	0.319013	-0.303595	0.0562073		YER044C	ERG28	-0.563783	0.243228	-1.03317
YER127W	LCP5	0.115429	-0.865013	-0.147162		YER045C	ACA1	-0.368744	0.77071	-0.0577025
YER129W	PAK1	-0.44331	0.384849	0.836488		YER046W	SPO73	0.102083	0.110197	0.114383
YER130C		1.55779	0.975789	0.561844		YER048C	CAJ1	-0.1419	0.757333	0.345008
YER131W	RPS26B	0.531411	-0.769961	0.113189		YER050C	RSM18	-0.798904	-0.371425	-0.93275
YER132C	PMD1	0.246863	0.385757	0.738573		YER052C	HOM3	-0.453607	0.226384	-0.572291
YER134C		-0.0700873	1.04552	-1.54156		YER053C		0.634188	0.235358	0.408841
YER135C		-1.98745	-1.03224	-2.11057		YER054C	GIP2	0.291076	0.112918	-0.370128
YER136W	GDI1	0.0367531	0.334699	-0.00868324		YER055C	HIS1	0.104516	0.251671	-0.286184
YER137C		-0.33538	-3.89481	0.183388		YER056C	FCY2	0.630212	0.219928	-0.336123
YER138C		1.4682	1.43019	1.19723		YER056C-A	RPL34A	-0.163367	0.20076	-0.321619
YER139C		0.0631233	0.0627569	-0.318661		YER057C	HMF1	-0.748115	0.123478	-0.703834
YER140W		0.0467861	0.0128752	-0.467202		YER060W	FCY21	0.44571	0.338919	-0.220419
YER141W	COX15	0.101869	-0.0961909	-0.420488		YER061C	CEM1	0.180689	0.61549	0.356377
YER142C	MAG1	-0.22492	0.00758742	0.130256		YER062C	HOR2	0.88871	1.11674	0.688376
YER143W	DDI1	-0.211808	-0.0669089	0.00333475		YER063W	THO1	-0.312376	0.194837	0.190434
YER145C	FTR1	0.0800483	0.419921	0.445567		YER064C		0.405025	0.268512	-0.0145874
YER146W	LSM5		-0.493595			YER065C	ICL1	0.0780134	0.0270859	0.0948598
YER147C	SCC4	0.176015	0.170306	0.306767		YER066W		-0.446823	0.453551	-0.592636
YER147C-A		0.19832	-0.0564652	-0.388293		YER067W		0.349461	0.898098	0.402988
YER148W	SPT15	-0.101658	-0.846264	-0.416323		YER068W	MOT2	0.143026	0.531049	0.515039
YER149C	PEA2	0.39195	-0.109959	-0.269224		YER071C		-0.299769	0.562301	-0.524249
YER150W	SPI1	1.6964	2.14066	0.960844		YER072W	VTC1	-0.975402	0.0471213	-0.735456
YER152C		0.164135	0.167398	-0.223865		YER073W	ALD5	-0.0749463	0.217106	-0.216097
YER153C	PET122	0.00939906	-0.0223725	-0.240618		YER074W	RPS24A	0.204341	0.499985	-0.135195
YER154W	OXA1	0.400082	0.234916	0.121131		YER075C	PTP3	-0.169952	0.12489	-1.15991
YER156C		0.187584	-0.129869	0.214139		YER076C		0.615472	0.917787	0.610704
YER158C		0.630947	0.692828	0.44167		YER076W-A		-0.616084	0.312835	-0.733454
YER159C	BUR6	0.676923	0.311634	0.433391		YER077C		1.37623	1.86533	2.08348
YER160C		-0.45959	0.125315	0.0203824		YER078C		-0.46015	1.03108	-0.135157
YER161C	SPT2	-0.181183	0.116673	0.103381		YER079W		-1.11073	0.126394	-1.04045
YER163C		-0.441458	-0.360993	-0.771389		YER081W	SER3	-0.11574	-0.123823	-0.113404
YER164W	CHD1	-1.49826	0.206183	0.0327841		YER082C	UTP7	0.108256	0.510586	0.241542
YER165W	PAB1	-1.47698	-0.348864	-1.37576		YER083C	RMD7	-0.216145	0.806721	0.0112486
YER166W	DNF1	0.529616	0.877817	-0.00941412		YER084W-A		-0.373436	-0.0182497	-0.319166
YER168C	CCA1	-0.176971	-0.353343	0.0511402		YER087W		0.265108	0.079854	0.190489
YER170W	ADK2	-0.739805	-0.676903	-1.29038		YER089C	PTC2	-0.222297	0.217448	0.230048
YER172C	BRR2	-0.537186	-0.181613	-0.239026		YER090W	TRP2	-1.05249	0.413539	-0.257285
YER173W	RAD24	-1.1857	-0.955754	-0.887537		YER092W	IES5	-0.549798	0.166765	0.180285
YER174C	GRX4	-0.212994	-0.114163	-0.298744		YER093C		0.0523405	0.755288	0.297493
YER175C	TMT1	0.279453	0.72043	0.446751		YER093C-A		0.168373	0.554676	-0.890285
YER176W	ECM32	-0.00551759	-0.243138	-0.515093		YER094C	PUP3	0.00610678	0.122152	0.197591
YER177W	BMH1	0.226848	-0.00627704	-0.207795		YER095W	RAD51	0.135627	0.749011	0.248023
YER178W	PDA1	0.02001	-0.269983	-0.501219		YER098W	UBP9	0.00716801	0.640191	0.84796
YER179W	DMC1	-0.077578	-0.0368295	-0.178589		YER099C	PRS2	-0.483023	0.803074	0.166664
YER180C	ISC10	-0.0318566	0.011733	-0.238811		YER100W	UBC6	0.43433	1.07939	0.759216
YER180C-A	SLO1	-0.425086	-0.605566	-0.537559		YER101C	AST2	0.0918899	0.64126	0.258539
YER182W		-0.358685	0.288776	0.0502238		YER102W	RPS8B	-1.40745	-0.48765	-1.47233
YER186C		0.254901	-0.178787	0.118215		YER104W	RTT105	-0.317048	0.369082	0.317785
YER187W		1.04641	-1.70488	-1.0647		YER105C	NUP157	-0.365519	0.186573	-0.540168
YER188W		0.401513	0.576345	-0.570689		YER106W	MAM1	2.34032	3.87908	2.72283
YFL067W		-0.00232642	-0.241576	-0.102632		YER107C	GLE2	0.192531	0.862422	0.00730155
YFL061W		-0.740729	0.202579	0.290305		YER109C	FLO8	-0.544986	1.46607	1.24326
YFL059W	SNZ3	0.927888	-0.118445	0.527188		YER110C	KAP123	-0.105016	0.154961	-0.395443
YFL058W	THI5	-0.376568	-0.168988	0.495258		YER111C	SWI4	-0.00473483	0.239459	-0.542728
YFL057C	AAD16	0.543315	1.10947	0.829585		YER112W	LSM4	-0.49863	0.263474	-0.260208
YFL056C	AAD6	0.21501	1.18458	0.84522		YER113C		-0.0458481	0.507164	-0.1148
YFL055W	AGP3			-1.6105		YER114C	BOI2	-0.246452	0.280206	-0.213027
YFL054C		-0.531216	0.322733	0.335138		YER115C	SPR6	0.165395	0.150419	0.119212
YFL052W		0.338645	0.3535	-0.22041		YER116C	SLX8	0.563735	0.918151	0.50151
YFL049W		-0.317413	-0.533675	-0.529402		YER117W	RPL23B	0.162754	0.36271	-0.00624307
YFL048C	EMP47	0.242078	0.124979	0.129068		YER119C	AVT6	-0.0154445	0.673061	-0.0160793
YFL047W	RGD2	-0.281583	-1.86517	-0.329252		YER120W	SCS2	-0.281159	-0.0173859	-0.388586
YFL046W		-0.146152	0.372357	-0.092759		YER121W		1.13698	1.08709	0.297814
YFL045C	SEC53	0.381328	-0.0775907	-0.463187		YER123W	YCK3	0.125929	0.484671	-0.109522
YFL044C		0.157592	0.0545586	0.222612		YER124C	DSE1	-0.564765	0.209624	-0.692447
YFL043C		-0.244454	-0.359047	-0.319104		YER126C	NSA2	0.951822	0.64718	0.557736
YFL042C		-0.452946	0.059315	-0.163992		YER127W	LCP5	0.549497	0.244433	0.0152461
YFL041W	FET5	-0.0894625	-0.191701	-0.194864		YER128W		0.0665424	0.816644	0.000652712
YFL040W		-0.781511	-0.372061	0.0432622		YER129W	PAK1	-0.288096	0.508401	0.394932
YFL038C	YPT1	0.332907	-0.69499	-0.0380559		YER130C		-0.555782	-0.0668837	-0.564452
YFL034W		-0.234689	-0.236658	-0.163337		YER131W	RPS26B	-1.15037	-0.244888	-1.03745
YFL034C-B	MOB2	0.0155716	-0.108548	0.109228		YER132C	PMD1	0.632825	0.559901	0.212506
YFL032W		0.912278	-0.0115933	-1.94155		YER134C		0.778808	1.53296	-0.122698
YFL031W	HAC1	0.226391	-0.433622	-0.215625		YER135C		-1.10559	0.392252	-0.759429
YFL030W	AGX1	-0.209373	-0.127601	-0.568566		YER136W	GDI1	0.0970833	0.441552	0.0918985
YFL029C	CAK1	0.00576046	0.120395	-0.172849		YER137C		0.108886	0.0257284	0.137978
YFL026W	STE2	1.11186	0.141453	-0.0906134		YER138C		0.360123	0.803439	0.315325
YFL025C	BST1	0.123246	-0.171663	-0.172929		YER139C		-0.247696	-0.0800964	0.0157523
YFL023W	BUD27	-1.12884	-1.49241	-0.36927		YER140W		0.139261	0.315145	0.0999641
YFL022C	FRS2	0.344391	-0.14511	-0.049642		YER141W	COX15	-0.490242	0.367683	-0.0806426
YFL021W	GAT1	0.155288	-0.312425	-0.684571		YER142C	MAG1	-0.333658	0.292632	-0.156249
YFL020C	PAU5	0.279836	0.746651	0.16469		YER143W	DDI1	-0.0242955	0.542818	0.15964
YFL018C	LPD1	-0.164922	-0.257896	-0.314507		YER145C	FTR1	0.0802281	0.600544	0.129777
YFL017W-A	SMX2	-0.106523	0.234588	-0.137479		YER146W	LSM5	-0.376105	0.801973	0.197235
YFL017C	GNA1	-0.0620728	-0.0101386	-0.900453		YER147C	SCC4	0.376466	0.388607	0.253395
YFL016C	MDJ1	-0.268869	-0.131055	-0.393231		YER147C-A		0.194839	0.533444	-0.458473
YFL014W	HSP12	1.19934	0.24214	-0.0818228		YER148W	SPT15	-0.557109	-0.252559	-0.452992
YFL013C	IES1	-0.35641	-0.182035	-0.109117		YER149C	PEA2	0.0305598	0.197644	-0.00585249
YFL010W-A	AUA1	0.495736	-0.197469	0.833738		YER150W	SPI1	-1.17564	-0.717205	0.429999
YFL008W	SMC1	0.0143658	0.479685	0.693566		YER152C		-0.0858702	0.209771	-0.0133807
YFL006W		-0.0451428	-0.285738	-0.304939		YER153C	PET122	0.444948	0.398698	0.323173
YFL002C	SPB4	-0.230982	0.123775	-0.0200109		YER154W	OXA1	-0.203355	0.193699	-0.111089
YFL001W	DEG1	-0.0238908	-0.0455947	0.259649		YER156C		-0.031051	0.0853398	0.198376
YFR001W	LOC1	-0.0651592	0.184037	-0.566809		YER158C		-0.0865258	0.353607	0.0522649
YFR002W	NIC96	-0.175456	0.0424538	-0.0123083		YER159C	BUR6	-0.0292943	0.195416	0.419068
YFR003C		0.145228	-0.231538	-0.67769		YER160C		-0.447658	0.827462	-0.11626
YFR004W	RPN11	0.159353	-0.204416	-0.447129		YER161C	SPT2	0.00511113	0.451483	0.23789
YFR005C	SAD1	-0.127447	-0.169412	-0.599709		YER163C		-0.0201983	0.144142	-0.060071
YFR006W		-0.871737	0.528537	-0.117543		YER164W	CHD1	0.293127	0.447766	0.173126
YFR007W		0.356385	-0.0660248	-0.302335		YER165W	PAB1	-1.04635	-0.000604706	-1.03133
YFR008W		0.2138	0.296728	-0.673265		YER166W	DNF1	0.128416	0.694269	0.0168621
YFR010W	UBP6	-0.177785	0.053975	0.223152		YER168C	CCA1	0.233107	0.432462	-0.0141532
YFR011C		-0.0481968	0.31117	0.0465241		YER170W	ADK2	0.00327784	-0.0438484	-0.291662
YFR014C	CMK1	-0.173513	0.0284677	0.152562		YER172C	BRR2	-0.296163	0.414252	0.0631654
YFR016C		-1.73407	0.956954			YER173W	RAD24	0.31731	-0.00444167	-0.485309
YFR017C		0.401585	-0.0547521	-0.369582		YER174C	GRX4	-0.0350934	0.610148	0.0394893
YFR018C		-9.95205e-05	-0.0822651	0.636788		YER175C	TMT1	-0.725787	0.519246	0.354028
YFR020W		0.378733	-0.196923	0.095712		YER176W	ECM32	0.0917404	0.242525	0.0545407
YFR021W	AUT10	0.326918	0.465304	0.078417		YER177W	BMH1	-0.48404	-0.0603073	-0.364056
YFR023W	PES4	-0.584053	0.0557388	0.146018		YER178W	PDA1	-0.229165	0.00150979	0.0442223
YFR024C		0.523321	0.135301	0.363087		YER179W	DMC1	-0.184689	0.166579	-0.127535
YFR025C	HIS2	-0.171288	0.115353	-0.0511861		YER180C	ISC10	-0.292761	-0.107311	-0.223003
YFR028C	CDC14	-0.204643	-0.0240295	-0.00231959		YER180C-A	SLO1	0.299991	0.239641	0.0637418
YFR029W	PTR3	-0.393904	-0.440795	-0.232259		YER182W		0.0320167	0.330412	-0.127923
YFR030W	MET10	-1.15153	-1.96233	-1.50955		YER183C	FAU1	-0.163824	0.29388	0.342726
YFR031C	SMC2	0.116698	0.739283	0.584784		YER186C		-0.270321	0.190756	-0.22747
YFR031C-A	RPL2A	0.259918	-0.35019	-0.0994807		YER187W		-0.183605	0.329471	-1.24267
YFR032C		-0.507935	-0.515257	0.012679		YER187W-A	KHS1	1.59181	-0.633858	-2.65972
YFR033C	QCR6	0.222337	-0.188841	-0.194086		YER188W		-0.0751523	0.206684	0.264553
YFR034C	PHO4	0.406085	-0.278454	-0.408909		YFL067W		0.279232	0.14956	-0.0830773
YFR035C		-0.170053	-0.571854	-0.331678		YFL061W		0.0916839	0.0327729	0.303298
YFR036W	CDC26	-0.0777382	-0.0971354	0.275841		YFL059W	SNZ3	0.193327	-1.09796	-0.811399
YFR037C	RSC8	-0.0232536	-0.238726	-0.142728		YFL058W	THI5	0.306042	-0.135592	0.138381
YFR039C		-0.00646001	0.276725	0.23267		YFL057C	AAD16	-0.353695	-0.3162	-0.0857032
YFR041C		-0.331703	-0.324387	-0.310041		YFL056C	AAD6	-0.466984	0.421111	0.545994
YFR042W		-0.104864	0.430959	0.601377		YFL052W		0.0963986	-0.605902	-0.353738
YFR043C		-0.427948	0.108457	-0.0595035		YFL051C		-1.90319		-2.01785
YFR044C		-0.240589	-0.034919	-0.160982		YFL049W		-0.325113	-0.0279144	-0.673472
YFR045W		0.102182	-0.613873	-0.332851		YFL048C	EMP47	-0.392213	-0.185956	-0.0649347
YFR046C		-0.589616	-0.218151	0.0702654		YFL047W	RGD2	0.234344	0.219739	0.475799
YFR047C	BNA6	0.124989	-0.20228	-0.550222		YFL046W		0.174367	0.0427591	-0.1765
YFR048W	RMD8	0.642062	0.569964	0.39652		YFL045C	SEC53	-0.248682	0.0690829	-0.470273
YFR049W	YMR31	-0.866846	-0.0577104	-1.95246		YFL044C		-0.00864528	-0.167404	0.152459
YFR050C	PRE4	0.112871	-0.0784219	-0.0188741		YFL043C		-0.0796353	-0.00830437	0.135404
YFR051C	RET2	-0.280247	-0.288827	-0.502398		YFL042C		-0.141724	0.274635	0.549366
YFR052W	RPN12	-0.267142	-0.512984	-0.214648		YFL041W	FET5	-0.121249	-0.169518	-0.0265395
YFR053C	HXK1	-0.557654	0.0831206	-0.294724		YFL040W		-0.180201	0.365802	-0.117534
YFR054C		-0.284099	0.506342	0.270733		YFL038C	YPT1	0.0522525	0.362679	-0.57639
YFR055W	IRC7	0.457282	0.551541	-0.00564835		YFL036W	RPO41	-0.900766	0.362739	-0.295281
YGL261C		0.329949	0.0347821	0.504275		YFL034W		0.049145	0.14707	-0.134514
YGL259W	YPS5		-0.88855			YFL034C-B	MOB2	0.287718	-0.0490234	0.0427902
YGL257C	MNT2	-0.494844	0.0838778	0.0838518		YFL033C	RIM15	0.913337	0.475025	1.08309
YGL256W	ADH4	-0.112206	0.198964	-0.090983		YFL032W		0.574275	-0.771866	-0.667273
YGL255W	ZRT1	0.00636455	0.89765	0.410564		YFL031W	HAC1	0.731015	-0.0374355	0.350609
YGL254W	FZF1	-0.0781908	-0.245033	0.0898854		YFL030W	AGX1	-0.322038	-0.279627	-0.957278
YGL253W	HXK2	-0.317081	-0.310931	-0.602598		YFL029C	CAK1	-0.049797	-0.0435225	0.0541277
YGL252C	RTG2	-0.0694208	0.235291	0.0452702		YFL026W	STE2	-0.480707	-1.08369	-1.33385
YGL251C	HFM1	-0.0778704	-0.387044	-0.0535741		YFL025C	BST1	-0.261462	-0.362218	-1.15157
YGL250W		-0.279174	-0.00405603	-0.297814		YFL023W	BUD27	-0.0740715	1.25657	1.22014
YGL248W	PDE1	1.33506	1.20934	0.418331		YFL022C	FRS2	-0.0571071	-0.0573731	-0.421279
YGL247W		0.545592	0.491846	0.174955		YFL021W	GAT1	-0.396882	0.0571435	-0.567215
YGL246C	RAI1	0.706984	-0.0713412	0.270192		YFL020C	PAU5	-0.106224	-0.0891722	0.317944
YGL245W		0.785806	0.0150279	-0.311926		YFL018C	LPD1	0.0611304	-0.301801	-0.105476
YGL244W	RTF1	-0.210376	-0.401668	-0.200591		YFL017W-A	SMX2	0.221282	0.230272	0.085706
YGL243W	TAD1	0.973356	1.00411	0.874112		YFL017C	GNA1	0.00648131	-0.325599	-0.0337753
YGL241W	KAP114	-0.0323372	-0.553423	-0.799294		YFL016C	MDJ1	-0.413681	-0.0563988	0.851766
YGL240W	DOC1	0.192259	0.238987	0.335927		YFL014W	HSP12	-1.25929		-0.171065
YGL238W	CSE1	-0.941298	-0.218419	-2.44586		YFL013C	IES1	0.198768	0.131444	0.44823
YGL237C	HAP2	-0.582387	-0.205426	-0.579837		YFL010W-A	AUA1	0.304727	-0.0615404	0.587017
YGL235W		0.623266	0.403034	0.627135		YFL008W	SMC1	0.0553867	0.383904	0.144844
YGL233W	SEC15		-1.69802	-0.701131		YFL006W		-0.0371926	-0.293245	-0.199644
YGL229C	SAP4	-0.389382	-0.0480387	-0.815394		YFL002C	SPB4	0.0755731	-0.0802351	0.155239
YGL228W	SHE10	-0.502492	-0.110279	0.0150811		YFL001W	DEG1	-0.223586	-0.484578	-0.0287131
YGL227W	VID30	-0.709421	-0.0194811	-0.355498		YFR001W	LOC1	-0.377653	-0.0249144	-0.41861
YGL225W	VGR4	1.08229	0.619587	0.89521		YFR002W	NIC96	-0.112698	0.0703201	-0.23575
YGL224C	SDT1	-0.325874	0.461087	0.205052		YFR003C		0.123843	0.215788	-0.0600608
YGL223C	COG1	-0.584576	0.0619195	-0.576412		YFR004W	RPN11	-0.610086	-0.534178	-0.403538
YGL222C	EDC1	0.0573625	-0.100891	-0.293904		YFR005C	SAD1	-0.469577	-0.304157	-0.377349
YGL220W		0.232164	0.205599	-0.681685		YFR006W		-1.00498	0.282959	-0.258815
YGL219C	MDM34	0.0592029	0.158769	0.0130039		YFR007W		-0.350032	-0.199351	0.14432
YGL215W	CLG1	0.281307	-0.258685	-0.066341		YFR008W		0.892442	0.460934	0.62268
YGL213C	SKI8	0.573455	0.674257	0.593777		YFR010W	UBP6	-0.0856699	-0.147856	0.213182
YGL212W	VAM7	0.153232	0.270107	0.237372		YFR011C		-0.0639746	0.248169	-0.0689868
YGL210W	YPT32	-0.144783	0.0502774	-0.0529148		YFR014C	CMK1	-0.288975	-0.127948	0.0912432
YGL209W	MIG2	0.413461	0.0410163	-0.198887		YFR016C		1.33612	1.63199	0.606317
YGL208W	SIP2	-0.237051	-0.0804646	-0.304604		YFR017C		0.820273	0.663803	0.533307
YGL207W	SPT16	0.0977607	-0.35188	-0.129292		YFR018C		0.024857	-0.481217	0.235336
YGL203C	KEX1	0.446575	-0.773691	0.0365037		YFR020W		-0.129053	-0.0116798	-0.292355
YGL202W	ARO8	0.0124397	-0.041927	-0.195864		YFR021W	AUT10	-0.165884	-0.327879	-0.130414
YGL201C	MCM6	0.0764696	-0.487909	-0.2753		YFR023W	PES4	-0.331381	-0.0129589	-0.801953
YGL200C	EMP24	-0.0205785	-0.190195	-0.161741		YFR024C		-0.560229	-0.615761	0.0423772
YGL199C		0.262079	-0.0362093	0.0372401		YFR025C	HIS2	-0.701943	0.164347	-0.517521
YGL198W	YIP4	0.0492612	-0.157513	0.0478629		YFR028C	CDC14	-0.120966	-0.389755	0.0206584
YGL197W	MDS3	0.386118	0.943471	0.904681		YFR029W	PTR3	0.180768	0.42463	0.15324
YGL196W		1.06892	1.00704	-0.033688		YFR030W	MET10	-0.698829	-0.742698	-0.938641
YGL194C	HOS2	-0.263888	-0.370173	-0.469466		YFR031C	SMC2	0.362508	0.324871	0.120517
YGL192W	IME4	0.426722	-0.309998	-0.279198		YFR031C-A	RPL2A	-0.519861	-0.234515	-0.652249
YGL191W	COX13	1.16871	-0.53757	-0.333867		YFR032C		-0.167118	-0.536759	-0.707641
YGL190C	CDC55	0.727939	0.832318	0.571515		YFR033C	QCR6	-0.253988	-0.254173	-0.240766
YGL186C	TPN1	-0.145066	-0.557425	-0.370495		YFR034C	PHO4	-0.151429	-0.336268	-0.598396
YGL185C		0.122323	0.423362	0.69456		YFR035C		-0.286523	-0.0658261	-0.114029
YGL184C	STR3	-1.75254	-0.911112	-0.787262		YFR036W	CDC26	-0.173491	-0.404585	0.188574
YGL179C		1.12389	1.58527	0.878125		YFR037C	RSC8	0.0282341	-0.21627	0.188163
YGL178W	MPT5	0.224497	0.488748	0.710337		YFR038W		0.000766429	-0.648007	-0.0601967
YGL177W		-1.98756	-1.92764	-0.559581		YFR039C		-0.0452272	0.333226	0.251496
YGL174W	BUD13	-0.343014	0.185235	-0.0508197		YFR040W	SAP155	-0.227924	-0.5314	-0.667764
YGL173C	KEM1	0.356404	0.270371	0.333964		YFR041C		0.409098	-0.236106	0.41671
YGL172W	NUP49	-0.20007	0.0433447	0.0717276		YFR042W		0.325937	0.11221	0.561085
YGL171W	ROK1	-0.118331	-0.518026	-0.421558		YFR043C		-0.188951	-0.0289388	0.13719
YGL169W	SUA5	-0.159441	-0.0792192	0.064835		YFR044C		-0.476845	-0.45037	-0.24359
YGL167C	PMR1	0.2895	0.23336	0.0228728		YFR045W		-0.038168	0.211423	-0.107425
YGL165C		-0.12957	0.606635	0.378814		YFR046C		0.610224	0.366651	0.561745
YGL164C	YRB30	-0.24099	-0.00687772	-0.101753		YFR047C	BNA6	0.21232	0.176713	-0.141453
YGL162W	SUT1	0.0294181	-0.319699	-0.14038		YFR048W	RMD8	-0.0105148	7.49574e-05	0.0189302
YGL161C	YIP5	-0.702464	0.2038	-0.161494		YFR049W	YMR31	0.670723	0.677974	-0.129181
YGL159W		1.29088	1.06835	1.06057		YFR050C	PRE4	0.00823772	-0.0752901	-0.0145977
YGL157W		0.554859	0.545306	0.161418		YFR051C	RET2	0.124303	-0.0651023	0.15146
YGL156W	AMS1	0.300047	0.544577	0.557814		YFR052W	RPN12	-0.00276432	0.242646	0.120812
YGL155W	CDC43	0.330962	0.269185	0.153897		YFR053C	HXK1	-0.113349	-0.258499	0.15777
YGL154C	LYS5	0.58437	0.910986	0.534305		YFR054C		1.97703	0.303781	1.49565
YGL153W	PEX14	0.18943	0.368026	0.143538		YFR055W	IRC7	0.483832	0.327068	0.42022
YGL152C		0.321108	0.121961	-0.340693		YGL261C		-0.573657	-0.20808	-0.23925
YGL151W	NUT1	0.165815	0.430508	0.1808		YGL257C	MNT2	-0.111565	0.118423	0.115405
YGL150C	INO80	0.902971	1.11255	0.800412		YGL256W	ADH4	0.071297	-0.313884	0.150452
YGL149W		0.017043	1.26992	0.72125		YGL255W	ZRT1	0.656373	0.883646	1.04391
YGL148W	ARO2	0.543837	0.0681706	-0.276227		YGL254W	FZF1	0.499784	0.285323	0.582553
YGL147C	RPL9A	0.97029	0.0260003	0.462105		YGL253W	HXK2	0.0288111	-0.523301	-0.105279
YGL146C		-0.398234	0.184736	-0.615524		YGL252C	RTG2	-0.0845542	-0.105785	0.0263642
YGL143C	MRF1	-0.170061	0.0309162	0.0904277		YGL251C	HFM1	0.436607	0.206784	0.0819999
YGL142C	GPI10	0.324687	0.281537	0.073414		YGL250W		-0.21462	0.386727	-0.307964
YGL140C		0.604378	1.13564	0.903794		YGL248W	PDE1	0.502537	0.0888871	0.0122766
YGL137W	SEC27	-0.263962	-0.147632	-0.319		YGL247W		1.31758	0.941843	0.921378
YGL136C	MRM2	0.376251	0.288948	0.471227		YGL246C	RAI1	0.192926	-0.0512836	-0.12081
YGL135W	RPL1B	0.662235	0.476684	-0.135972		YGL245W		-1.00063	-0.362217	-0.897379
YGL134W	PCL10	-0.00604941	0.168945	0.15639		YGL244W	RTF1	0.150063	0.229923	0.121073
YGL132W		-0.47481	-0.236223	0.0679464		YGL243W	TAD1	0.699085	1.21778	0.980226
YGL131C		-0.22753	-1.63713	-0.295286		YGL242C		-2.5719	0.657155	-0.180127
YGL130W	CEG1	-0.0569402	0.339415	0.132212		YGL241W	KAP114	-0.17662	0.0493307	-0.188829
YGL129C	RSM23	-0.2125	-0.277751	0.177459		YGL240W	DOC1	0.592415	0.071061	0.301801
YGL128C	CWC23	0.672323	1.28234	0.576085		YGL238W	CSE1	0.493114	0.742271	0.554181
YGL127C	SOH1	0.174988	1.53526	0.702556		YGL237C	HAP2	-0.347993	0.137989	-0.134855
YGL125W	MET13	-0.146622	-0.268832	-0.654698		YGL235W		3.49601	0.0580281	3.78474
YGL124C	MON1			-3.92679		YGL233W	SEC15	-0.730925	-1.16829	-0.346738
YGL123W	RPS2	0.884065	-0.614353	-0.437822		YGL231C		-0.926483	-0.16435	-1.35976
YGL122C	NAB2	0.255824	-0.0735451	-0.0550043		YGL229C	SAP4	0.38878	-0.301986	0.140804
YGL121C	GPG1	-0.694342	1.6168	-0.659335		YGL228W	SHE10	-0.0050998	-0.0219872	0.3249
YGL119W	ABC1	0.138053	-0.116543	0.186947		YGL227W	VID30	0.222789	0.333933	0.210918
YGL116W	CDC20	0.330248	-0.430164	-0.222997		YGL225W	VGR4	0.358673	0.398869	0.0297332
YGL115W	SNF4	0.4891	0.38908	0.205058		YGL224C	SDT1	0.229197	0.326134	0.115652
YGL113W	SLD3	-5.34296	-4.98386	-0.397357		YGL223C	COG1	0.155277	0.0948281	0.00670442
YGL112C	TAF6	-0.458098	-0.535931	-0.388504		YGL222C	EDC1	-0.00597309	-0.149711	0.404544
YGL111W	NSA1	0.273732	-0.390808	0.0895207		YGL220W		-0.202458	-0.198236	-0.493661
YGL110C	CUE3	-0.10406	-0.0153251	0.186778		YGL219C	MDM34	-0.146499	0.162519	-0.117783
YGL109W		0.198964	-0.745337	-0.45818		YGL215W	CLG1	-0.183557	-0.109749	-0.683655
YGL108C		0.135672	0.384005	-0.351118		YGL214W		-0.432709	-0.27186	0.603808
YGL106W	MLC1	-0.129859	-0.267848	-0.607685		YGL213C	SKI8	0.254944	0.569049	0.445618
YGL105W	ARC1	0.321765	-0.0362986	-0.153086		YGL212W	VAM7	0.661292	0.709161	0.820548
YGL104C	VPS73	-0.538283	0.0544686	0.0242536		YGL210W	YPT32	-0.151695	-0.0309345	-0.103159
YGL103W	RPL28	0.355625	-0.299744	0.0633592		YGL209W	MIG2	0.601546	-0.424036	0.0747452
YGL102C		0.440079	-0.607697	-0.193859		YGL208W	SIP2	0.1168	-0.01264	-0.0868744
YGL101W		0.137539	-0.215017	-0.507041		YGL207W	SPT16	0.24026	0.279752	0.110476
YGL100W	SEH1	0.2927	0.0146765	0.276873		YGL204C		-2.46964	1.2464	-0.403237
YGL099W	LSG1	0.348783	-0.837334	-0.0273219		YGL203C	KEX1	-0.211269	-0.0851089	-0.283776
YGL098W	USE1	-0.0418251	-0.391863	-0.41769		YGL202W	ARO8	-0.513131	-0.105805	-0.156788
YGL097W	SRM1	0.00332912	-0.151525	0.252932		YGL201C	MCM6	-0.176869	-0.169142	-0.619666
YGL096W	TOS8	0.0423286	1.036	0.543542		YGL200C	EMP24	-0.497941	-0.153574	-0.486721
YGL094C	PAN2	0.128426	-0.394257	-0.496953		YGL199C		0.0794439	-0.111139	0.0504441
YGL092W	NUP145	-0.351455	-0.226265	-0.416582		YGL198W	YIP4	-0.0546474	-0.0210314	0.0719585
YGL091C	NBP35	0.533277	0.152293	0.638442		YGL197W	MDS3	-0.411106	0.201987	-0.276591
YGL090W	LIF1	-0.26129	-0.0569876	0.0148261		YGL196W		-0.868118	-0.648214	-0.452235
YGL089C	MFAlpha2	-4.61331	1.07794	0.215869		YGL194C	HOS2	-0.0327908	-0.226219	-0.272064
YGL088W		-1.78314	-3.38381	-0.959561		YGL192W	IME4	0.0487073	-1.30424	-0.732813
YGL087C	MMS2	-0.147247	0.189237	-0.297697		YGL191W	COX13	-0.752277	-0.443053	-0.973758
YGL084C	GUP1	-0.242488	0.12306	0.0805197		YGL190C	CDC55	0.366293	0.219191	0.287403
YGL082W		0.108088	0.39616	-0.0347401		YGL186C	TPN1	-0.113724	-0.294837	-0.14659
YGL080W		0.0930017	0.111759	-0.727147		YGL185C		0.268311	0.628826	0.639686
YGL079W		-0.176878	-1.18199	-0.471771		YGL184C	STR3	-0.537691	0.391514	0.374833
YGL078C	DBP3	0.0416627	-0.790451	-0.179761		YGL179C		-0.112152	-0.144309	0.272677
YGL077C	HNM1	-0.553748	-0.476319	-0.363163		YGL178W	MPT5	-0.149591	0.112748	0.0470657
YGL076C	RPL7A	0.0198312	-1.35269	-0.626388		YGL177W		0.331762	-1.44338	-0.0960797
YGL075C	MPS2	0.586994	1.14938	0.303686		YGL174W	BUD13	-0.135377	0.209174	-0.0843747
YGL074C		0.40165	-0.231634	-0.40799		YGL173C	KEM1	0.136969	-0.139446	0.013212
YGL073W	HSF1	-0.0143951	0.651801	-0.453414		YGL172W	NUP49	-0.227428	-0.116064	-0.129646
YGL072C		0.314689	0.0931972	0.0999168		YGL171W	ROK1	-0.0224265	-0.290273	-0.110775
YGL071W	RCS1	-0.22074	-0.133021	0.134876		YGL170C	SPO74	0.386071	0.689911	-0.775873
YGL070C	RPB9	0.804786	0.709872	-0.0320574		YGL169W	SUA5	0.185771	0.108587	0.0853451
YGL068W		-0.404806	-0.0152397	-0.324466		YGL168W	HUR1	-0.651942	-0.649737	-0.972985
YGL067W	NPY1	0.699487	0.664171	0.470026		YGL167C	PMR1	0.126169	-0.0562076	0.0308479
YGL066W	SGF73	-0.00504677	0.228697	-0.184838		YGL165C		-0.555526	0.374841	0.477257
YGL065C	ALG2	0.244125	-0.260665	-0.478688		YGL164C	YRB30	-0.0544416	-0.214146	-0.180242
YGL064C	MRH4	-0.0824215	0.0721945	-0.0303495		YGL162W	SUT1	0.661357	-0.495709	-0.0372767
YGL063W	PUS2	0.209516	-0.192301	0.224753		YGL161C	YIP5	-1.0793	0.532557	0.206109
YGL062W	PYC1	0.685726	2.03985	1.48142		YGL159W		0.763039	1.08433	0.688737
YGL061C	DUO1	-0.600802	-0.503974	-0.447607		YGL157W		0.478284	0.757152	0.271963
YGL058W	RAD6	-0.166215	-0.329363	-0.556022		YGL156W	AMS1	0.582356	0.425388	0.00502319
YGL057C		0.222659	0.113324	0.271224		YGL155W	CDC43	0.297943	0.30499	0.175084
YGL056C	SDS23	-0.320316	-0.043964	0.31302		YGL154C	LYS5	0.533222	0.470773	0.489144
YGL055W	OLE1	-0.0526408	0.722128	0.239278		YGL153W	PEX14	0.34208	0.0954015	0.0352571
YGL054C	ERV14	0.95026	0.323334	-0.4131		YGL152C		0.425548	0.000652448	0.0596775
YGL053W	PRM8	0.317845	0.400807	0.531479		YGL151W	NUT1	0.086244	0.449751	0.151427
YGL051W	MST27	0.221069	0.609766	0.317087		YGL150C	INO80	0.225815	0.304149	0.298293
YGL050W		0.145692	0.113908	0.115034		YGL149W		-0.0420693	-0.0224418	0.277791
YGL049C	TIF4632	-0.473842	0.397464	-0.169165		YGL148W	ARO2	-0.249674	-0.32268	-0.376221
YGL048C	RPT6	0.821611	0.538362	0.66817		YGL147C	RPL9A	-0.125762	0.296964	-0.520214
YGL047W		-0.24744	-0.364392	-0.443743		YGL146C		-0.445087	0.324441	0.695912
YGL046W		-0.170986	0.477502	0.850098		YGL143C	MRF1	0.0176265	0.100454	-0.0372671
YGL045W	RIM8	-0.145442	0.705423	0.969955		YGL142C	GPI10	-0.449141	0.00501766	-0.727474
YGL043W	DST1	0.5822	0.497505	0.476721		YGL140C		-0.200813	0.0481369	-0.306361
YGL042C		0.0207232	-0.0951478	-0.297829		YGL137W	SEC27	0.0928412	-0.142412	0.0111591
YGL040C	HEM2	0.772745	0.456906	0.630058		YGL136C	MRM2	0.0155928	0.248772	0.632566
YGL039W		0.0597222	0.513863	0.678412		YGL135W	RPL1B	-0.575167	1.31923	-0.339924
YGL038C	OCH1	0.387198	0.174717	0.351046		YGL134W	PCL10	0.109619	0.311351	0.375611
YGL037C	PNC1	-0.604576	0.455873	-0.908068		YGL133W	ITC1		6.24349
YGL036W	MTC2	-0.653383	0.40715	-1.42482		YGL132W		-0.416379	-0.198638	-0.0679829
YGL035C	MIG1	-0.338935	0.062734	-0.047998		YGL131C		-0.724317	-0.682484	-0.266753
YGL031C	RPL24A	0.441695	-0.362871	-0.209232		YGL130W	CEG1	-0.0966199	0.417137	0.258671
YGL030W	RPL30	0.355453	-0.113282	-0.158184		YGL129C	RSM23	0.103452	-0.0322376	0.272404
YGL029W	CGR1	-0.0321654	0.177184	0.506641		YGL128C	CWC23	0.560147	0.703169	0.643618
YGL025C	PGD1	-0.0100922	-0.178425	-0.217868		YGL127C	SOH1	-0.462963	0.321715	0.161476
YGL019W	CKB1	0.100249	0.246271	0.0974479		YGL125W	MET13	-0.27748	-0.423577	-0.366782
YGL018C	JAC1	-2.9987	0.0139021	-1.06825		YGL124C	MON1	-1.53653	-2.02152
YGL017W	ATE1	0.162391	-0.213753	0.0705244		YGL123W	RPS2	0.0355521	0.242566	-0.724342
YGL013C	PDR1	0.0592449	-0.0644694	0.20703		YGL122C	NAB2	-0.0176272	0.269962	-0.0616248
YGL012W	ERG4	-0.139613	0.0513491	-0.251823		YGL121C	GPG1	0.00603519	0.149752	-0.21094
YGL011C	SCL1	-0.0465088	-0.162921	-0.435843		YGL119W	ABC1	-0.111605	-0.202004	-0.253882
YGL006W	PMC1	0.774673	2.06794	1.90881		YGL118C		1.84667	1.17271	0.00896295
YGL005C	COD5	-0.456592	0.281484	0.0976022		YGL116W	CDC20	0.141096	-0.820867	-0.324478
YGL004C	RPN14	-0.274866	0.00066979	-0.0777481		YGL115W	SNF4	0.260312	0.441104	0.55554
YGL003C	CDH1	-0.36489	-0.177117	-0.427009		YGL113W	SLD3	0.198844	-1.15809	-0.396944
YGL002W	ERP6	-0.468955	-0.366268	-0.598479		YGL112C	TAF6	0.193961	0.0522085	0.22836
YGL001C	ERG26	0.786535	0.318947	0.339621		YGL111W	NSA1	0.326227	-0.333813	0.0274539
YGR002C		0.0298464	0.216552	0.0934312		YGL110C	CUE3	0.0110826	-0.886862	0.029546
YGR004W		-0.260749	-0.131727	0.073008		YGL109W		0.215187	0.375622	0.164155
YGR005C	TFG2	0.471085	0.691136	0.602354		YGL108C		-0.0103537	0.0643597	-0.0263617
YGR006W	PRP18	-0.254689	0.0279479	0.235173		YGL106W	MLC1	0.19706	0.0514292	-0.601696
YGR007W	MUQ1	-0.598593	0.996652	0.29637		YGL105W	ARC1	-0.0178482	-0.0671982	-0.0846421
YGR008C	STF2	0.200959	0.717818	-0.0122181		YGL104C	VPS73	-0.122077	-0.252055	0.262005
YGR009C	SEC9	-0.199113	-0.261006	-0.650488		YGL103W	RPL28	0.338255	0.190689	0.0690188
YGR010W	NMA2	0.117858	-0.0316232	-0.069617		YGL102C		-0.238063	0.484428	-0.853537
YGR012W		0.250976	0.133279	0.290257		YGL101W		-0.100563	0.0562151	-0.21632
YGR013W	SNU71	0.161015	0.0114638	-0.227316		YGL100W	SEH1	0.23391	0.263389	0.369542
YGR014W	MSB2	-0.634044	-0.6588	-0.688363		YGL099W	LSG1	-0.12688	-0.647029	-0.542404
YGR015C		0.825766	1.07552	0.745805		YGL098W	USE1	0.242312	0.0043782	0.106254
YGR017W		0.106752	0.902194	0.324493		YGL097W	SRM1	-0.207859	-0.128816	0.275037
YGR019W	UGA1	1.05627	0.622487	0.321486		YGL096W	TOS8	0.133512	0.906401	1.0374
YGR020C	VMA7	-0.100221	0.092371	-0.883334		YGL094C	PAN2	-0.0343472	-0.0998451	-0.41743
YGR021W		0.470554	0.398678	-0.00111179		YGL093W	SPC105	0.478372	1.71164	0.556537
YGR022C		-0.146208	0.407135	-0.00402441		YGL092W	NUP145	-0.00147448	-0.161036	-0.433389
YGR023W	MTL1	-0.110999	0.954366	0.356716		YGL091C	NBP35	0.224354	0.348977	0.569991
YGR024C		-0.35632	-0.286156	-0.298691		YGL090W	LIF1	0.00280363	-0.0789621	0.22776
YGR025W		-0.0762876	-0.13849	0.042396		YGL089C	MFAlpha2	-0.723151	0.932559	0.264039
YGR026W		-0.424856	-0.00819703	-0.402659		YGL088W		-0.496802	-0.294626	-0.659396
YGR027C	RPS25A	0.144084	0.109454	0.209003		YGL087C	MMS2	-0.0626276	0.118012	-0.581132
YGR028W	MSP1	0.653935	0.743674	0.606485		YGL084C	GUP1	0.192519	-0.495534	0.119107
YGR029W	ERV1	-0.276776	0.515291	0.391177		YGL082W		0.426002	0.40742	0.759156
YGR030C	POP6	-0.885639	-1.96224	-2.15739		YGL080W		0.579439	0.486326	0.222549
YGR032W	GSC2	0.545844	0.652252	1.04368		YGL079W		0.00381233	0.118454	-0.308097
YGR033C		0.23911	0.426507	-0.123657		YGL078C	DBP3	0.342515	-0.130872	0.0746543
YGR034W	RPL26B	0.39098	-0.391635	-0.346446		YGL077C	HNM1	-0.537656	-0.194944	-0.28349
YGR035C		-3.97984	0.587428	-0.427628		YGL076C	RPL7A	-0.347291	-0.262335	-0.932017
YGR036C	CAX4	-0.107266	-0.387007	-0.665294		YGL075C	MPS2	1.22217	1.142	1.08498
YGR037C	ACB1	-0.115387	0.717607	0.441927		YGL074C		-0.269867	0.049095	0.00512264
YGR038W	ORM1	0.30146	0.0593896	-0.237589		YGL073W	HSF1	-0.69932	-0.851437	-1.58625
YGR040W	KSS1	0.558776	0.245685	0.412586		YGL072C		-0.175471	-0.00596101	-0.0812655
YGR041W	BUD9	0.742765	0.183907	0.0306918		YGL071W	RCS1	-0.629992	0.281165	-0.292543
YGR042W		0.548391	0.640089	0.502112		YGL070C	RPB9	-0.355039	0.0281648	-0.327972
YGR043C		0.578743	0.701075	0.577679		YGL069C			2.72847	3.24581
YGR044C	RME1	3.27484	1.02469	0.453446		YGL068W		-1.25844	0.317569	-0.0823954
YGR045C		-0.722185	0.785852	0.247864		YGL067W	NPY1	0.596653	0.716864	0.485784
YGR046W		-0.0800378	-0.00593267	-0.0969464		YGL066W	SGF73	-0.389848	-0.0204996	0.29613
YGR047C	TFC4	-0.140667	0.270105	-0.0853794		YGL065C	ALG2	-0.272805	-0.356722	0.0190408
YGR048W	UFD1	0.591598	0.68444	0.851159		YGL064C	MRH4	0.0697783	-0.459679	0.120899
YGR049W	SCM4	0.619816	-0.0702058	-0.267275		YGL063W	PUS2	0.804794	0.352583	0.533999
YGR050C		-0.11424	-0.161451	-0.0261496		YGL062W	PYC1	0.869457	0.827631	0.0625821
YGR051C		-0.309695	0.274083	0.028699		YGL061C	DUO1	0.27494	0.120669	0.146648
YGR052W		1.91831	1.59565	-3.54372		YGL058W	RAD6	-0.0904131	0.174218	-0.0877949
YGR054W		0.339663	-0.854215	-0.171298		YGL057C		0.209756	0.211601	0.298532
YGR055W	MUP1	-0.84502	-0.661021	-0.724163		YGL056C	SDS23	-1.20722	0.28109	-0.0490496
YGR058W		0.550433	0.327304	0.335565		YGL055W	OLE1	-1.07753	0.0656297	-0.517523
YGR060W	ERG25	1.4021	-0.0235192	1.33302		YGL054C	ERV14	-0.0393629	0.258865	-0.263957
YGR061C	ADE6	-0.0412017	-0.407755	0.176904		YGL053W	PRM8	-0.262859	0.164597	0.0942712
YGR062C	COX18	-0.218932	-1.03841	-0.707356		YGL051W	MST27	0.0876866	0.417044	0.146497
YGR063C	SPT4	-1.83462	-0.135213	-4.76739		YGL050W		0.559614	0.197788	0.460556
YGR065C	VHT1	0.0748634	-0.310501	0.134624		YGL049C	TIF4632	-0.277268	0.0671448	-0.504636
YGR068C		0.452934	0.379701	0.362397		YGL048C	RPT6	0.697686	0.639773	0.728849
YGR071C		0.290406	-0.264106	0.385208		YGL047W		0.496447	-0.125452	0.14688
YGR073C		-0.0835008	-1.0473	-0.439337		YGL046W		-0.830644	0.217464	-0.0625591
YGR074W	SMD1	-0.250419	-0.59643	-0.0712784		YGL045W	RIM8	-0.47259	0.603237	0.547893
YGR075C	PRP38	0.145678	-0.0729082	-0.307104		YGL043W	DST1	0.541602	0.541855	0.615176
YGR076C	MRPL25	-0.651038	-0.681002	-0.206376		YGL042C		-0.488437	0.143284	-0.338554
YGR078C	PAC10	0.224891	-0.280429	-0.115495		YGL041C		-1.44945	0.765362	0.12261
YGR079W		2.32345	0.894359	1.35604		YGL040C	HEM2	0.270393	0.306546	0.282378
YGR080W	TWF1	-0.469358	-0.106482	-0.238154		YGL039W		0.561149	0.236813	0.694431
YGR081C		0.501566	0.0997629	-0.136248		YGL038C	OCH1	0.203192	-0.297511	0.211471
YGR082W	TOM20	-0.550301	-0.0481762	-0.182786		YGL037C	PNC1	-0.559026	-0.170854	-0.0816024
YGR084C	MRP13	-0.335306	-0.391405	-0.609571		YGL036W	MTC2	0.593979	0.28544	0.448461
YGR086C	PIL1	1.2474	1.26798	0.937084		YGL035C	MIG1	-0.117798	-0.0543914	-0.117717
YGR087C	PDC6	0.0317809	0.2651	0.336397		YGL033W	HOP2	-0.28286
YGR091W	PRP31	-0.169856	0.346979	-0.043527		YGL032C	AGA2	2.09227	-4.68941	-4.46976
YGR092W	DBF2	-0.353852	-0.247056	-0.34591		YGL031C	RPL24A	-0.360971	0.254291	-0.793412
YGR093W		-0.0790935	-0.310761	0.142531		YGL030W	RPL30	0.289423	0.0564411	-0.170312
YGR094W	VAS1	0.402774	0.409048	0.0760144		YGL029W	CGR1	-0.0438986	-0.0643958	0.119109
YGR095C	RPR46	0.00988561	-0.162663	-0.0431038		YGL025C	PGD1	-0.0757025	-0.0809844	-0.0370352
YGR096W	TPC1	-0.0265224	-0.0923635	0.326322		YGL019W	CKB1	0.277501	0.246683	0.250144
YGR097W	ASK10	-0.312695	0.38292	0.514599		YGL018C	JAC1	-0.768369	0.98983	0.311233
YGR098C	ESP1	0.837443	-0.366858	-0.203085		YGL017W	ATE1	-0.07628	-0.346936	-0.363888
YGR099W	TEL2	-0.00912894	-1.0695	-0.316022		YGL013C	PDR1	-0.105409	-0.23158	-0.555255
YGR101W	PCP1	0.547878	0.529647	0.380323		YGL012W	ERG4	-0.271147	-0.219543	-0.296698
YGR102C		0.116736	0.304688	0.159422		YGL011C	SCL1	-0.109724	0.0241381	-0.24337
YGR103W	NOP7	0.37902	-0.399328	0.304927		YGL008C	PMA1	3.7475	0.0403276	0.164983
YGR104C	SRB5	0.448738	-0.420758	0.100819		YGL006W	PMC1	0.43649	0.739071	0.574652
YGR105W	VMA21	0.653427	0.0112994	1.15882		YGL005C	COD5	0.210848	0.374202	0.276996
YGR106C		-0.066556	-0.57625	-0.303926		YGL004C	RPN14	-0.0442363	-0.0571365	0.0643605
YGR108W	CLB1	1.14374	0.0678627	-0.52722		YGL003C	CDH1	-0.0825831	-0.317136	-0.182433
YGR109C	CLB6	0.485977	-0.474726	0.558606		YGL002W	ERP6	-0.0134277	0.250534	0.118702
YGR110W		0.0991348	-0.0265134	0.52005		YGL001C	ERG26	0.0884343	0.074267	-0.207759
YGR111W		0.249706	1.50251	1.04982		YGR002C		0.00239424	0.026184	0.3428
YGR112W	SHY1	0.500052	1.32748	1.28057		YGR004W		-0.164968	-0.0657562	-0.00214505
YGR113W	DAM1	0.0464027	0.111892	-0.188024		YGR005C	TFG2	0.382221	0.663811	0.844483
YGR114C		-1.303	-1.39524	-0.308957		YGR006W	PRP18	0.277824	0.121766	0.434686
YGR115C		-0.143423	-0.182885	-0.69048		YGR007W	MUQ1	-0.0923075	0.695257	0.743216
YGR117C		-0.00910978	-0.0717097	-0.157916		YGR008C	STF2	-0.487327	-0.279078	0.344417
YGR118W	RPS23A	0.257925	-0.375083	-0.247558		YGR009C	SEC9	0.0357861	-0.310649	-0.35592
YGR119C	NUP57	0.110418	-0.19955	-0.240387		YGR010W	NMA2	0.449741	-0.0580729	0.145121
YGR120C	COG2	-0.107834	0.0537369	-0.332423		YGR012W		0.740293	0.323963	0.623184
YGR121C	MEP1	0.218216	0.380476	-0.2485		YGR013W	SNU71	-0.482235	-0.122598	-0.711749
YGR122W		1.12338	0.936489	0.746209		YGR014W	MSB2	-0.483792	-0.290816	-0.496216
YGR123C	PPT1	-0.0108824	-0.671857	-0.366314		YGR015C		0.394988	0.833187	0.606646
YGR124W	ASN2	0.523783	0.401451	0.39354		YGR016W		-1.09062	0.353668	-0.00389668
YGR126W		0.912055	0.686484	0.175451		YGR017W		-0.71509	0.324705	0.188622
YGR127W		0.852478	1.10267	0.514123		YGR019W	UGA1	-0.400142	-0.195602	-0.131573
YGR128C	UTP8	0.482026	-0.357729	-0.234977		YGR020C	VMA7	-0.171431	0.150793	-0.416319
YGR132C	PHB1	0.836553	1.21633	1.14088		YGR021W		0.676625	-0.0820351	0.207056
YGR134W	CAF130	0.305877	-0.448309	-0.467921		YGR022C		0.195868	0.748578	0.711138
YGR135W	PRE9	-0.181513	0.317298	0.268831		YGR023W	MTL1	-0.417184	-0.0045636	0.216942
YGR136W	LSB1	-0.159036	0.113229	0.0199248		YGR024C		-0.0555628	0.0252346	-0.0773561
YGR137W		0.0319637	0.305834	0.0306385		YGR025W		-0.256457	0.133103	-0.231597
YGR138C	TPO2	1.06345	0.904229	0.281727		YGR026W		-0.0206701	-0.124783	-0.0750826
YGR140W	CBF2	0.0144505	0.0515831	-1.39025		YGR027C	RPS25A	-0.515845	0.0869926	-0.61623
YGR141W	VPS62	-0.655274	-0.0699231	-0.27082		YGR028W	MSP1	0.752305	0.53255	1.07509
YGR142W	BTN2	-1.36693	0.283409	0.397158		YGR029W	ERV1	0.441368	0.179209	0.314502
YGR147C	NAT2	0.432242	1.00275	0.867827		YGR030C	POP6	-0.667349	-0.0100196	-0.302236
YGR148C	RPL24B	0.432853	-0.173703	-0.104748		YGR032W	GSC2	0.20119	-0.281655	0.434704
YGR149W		-0.641004	0.383296	0.365629		YGR033C		-0.0967398	-0.0772275	0.0046826
YGR150C		-0.517695	-0.285666	-0.0175996		YGR034W	RPL26B	-0.118918	0.0590567	-0.646414
YGR151C		-0.373048	0.398196	0.779268		YGR035C		0.49793	-0.41129	-0.25641
YGR152C	RSR1	-0.159891	-0.0468177	0.0410497		YGR036C	CAX4	0.221764	0.0668068	-0.291644
YGR154C		0.622223	0.914506	0.629296		YGR037C	ACB1	0.09977	0.386956	0.71068
YGR155W	CYS4	-0.391043	-0.0906674	-0.218503		YGR038W	ORM1	-0.0950942	0.0290323	0.258265
YGR156W	PTI1	-0.208002	0.0345349	-0.0189333		YGR040W	KSS1	0.723253	0.0603689	0.469303
YGR158C	MTR3	-0.0388565	0.0659398	0.225556		YGR041W	BUD9	-0.489448	-0.185875	-0.604145
YGR159C	NSR1	-0.235521	-0.0385351	0.255053		YGR042W		0.626546	0.795034	0.659884
YGR160W		0.317315	-0.205162	0.420037		YGR043C		0.865764	0.125707	0.390798
YGR161C	RTS3	-0.363399	0.231338	0.408855		YGR044C	RME1	0.0231314	-1.71509	-2.39168
YGR161W-C		-0.748998	-0.195898	0.330047		YGR045C		0.600499	0.374361	1.05871
YGR163W	GTR2	0.205138	0.109195	-0.0337346		YGR046W		0.378715	0.419232	0.436059
YGR164W			-3.56549	-0.111964		YGR047C	TFC4	-0.214962	-0.242155	-0.375471
YGR165W	MRPS35	0.336996	0.508838	0.465594		YGR048W	UFD1	0.575162	0.365102	0.770963
YGR166W	KRE11	-0.696194	-0.377203	-0.100418		YGR049W	SCM4	-0.216047	-0.176215	-0.42949
YGR167W	CLC1	-0.161279	0.0910433	-0.182286		YGR050C		-0.626833	0.168742	-0.491114
YGR168C		0.27294	0.5229	0.309693		YGR051C		-0.0120748	0.557686	0.490023
YGR169C	PUS6	0.219378	0.0402937	-0.0267888		YGR052W		-2.10753	0.366756	-1.25009
YGR169C-A		0.31945	-0.309412	0.103768		YGR054W		-0.167994	-0.349364	-0.495554
YGR170W	PSD2	0.469175	0.255319	0.494286		YGR055W	MUP1	-0.314944	-0.269565	0.0863356
YGR171C	MSM1	0.249227	-0.254072	-0.342787		YGR058W		0.212027	0.224079	0.697559
YGR172C	YIP1	-0.00959436	-0.443737	-0.151763		YGR060W	ERG25	0.0665854	0.681461	-0.411317
YGR175C	ERG1	0.403603	-0.389493	-0.0142276		YGR061C	ADE6	-0.570233	-0.17466	-0.218866
YGR176W		0.215015	-0.442443	0.0973271		YGR062C	COX18	0.0376479	-0.162969	0.162657
YGR177C	ATF2	-0.837358	-0.340903	-0.0842261		YGR063C	SPT4	-1.24962	0.0920807	0.379001
YGR179C	OKP1	0.352544	-0.289493	0.164281		YGR064W		-0.739605	0.338206	0.159694
YGR180C	RNR4	0.539253	0.207967	0.451715		YGR065C	VHT1	0.0632813	-0.460255	-0.0664633
YGR181W	TIM13	0.210077	0.0090081	0.296391		YGR068C		0.00263802	0.308499	-0.158984
YGR182C		0.134759	0.205512	-0.030999		YGR069W		-1.32389	0.460389	0.952912
YGR183C	QCR9	0.255904	0.0494883	-0.0921456		YGR071C		-0.759889	-0.374877	-0.524886
YGR185C	TYS1	0.845606	0.489489	0.418422		YGR073C		-0.287016	0.0205743	0.0512137
YGR187C	HGH1	0.899887	0.190945	0.679858		YGR074W	SMD1	-0.260268	-0.080847	-0.169363
YGR188C	BUB1	-0.283577	-0.250177	-0.487861		YGR075C	PRP38	-0.131998	0.0427375	0.0193607
YGR189C	CRH1	-0.35778	0.208474	0.140515		YGR076C	MRPL25	-0.243404	0.0482614	-0.31033
YGR190C		0.0295293	0.0111521	-0.197467		YGR078C	PAC10	0.263638	-0.368322	0.162278
YGR191W	HIP1	0.229306	-0.0273765	-0.109914		YGR079W		0.763697	-0.291468	-0.307203
YGR192C	TDH3	1.70176	1.33511	0.657425		YGR080W	TWF1	-0.0331979	-0.20069	0.0235304
YGR193C	PDX1	0.0344546	0.304096	-0.0254563		YGR081C		0.10322	-0.050647	-0.517497
YGR194C	XKS1	-0.297904	0.404128	0.331834		YGR082W	TOM20	-1.53609	0.377215	-0.307708
YGR195W	SKI6	0.216579	-0.104751	0.032656		YGR084C	MRP13	0.111177	-0.0577737	0.0960274
YGR197C	SNG1	-0.219228	-0.442834	-0.123765		YGR086C	PIL1	0.490406	0.849418	0.954718
YGR202C	PCT1	0.249547	0.00158614	-0.0216924		YGR087C	PDC6	0.0742115	-0.57367	0.221911
YGR203W	HUR1	-0.034254	-0.217352	-0.296884		YGR091W	PRP31	-0.228932	-0.0625147	-0.163896
YGR204W	ADE3	-0.238418	-0.128279	-0.2563		YGR092W	DBF2	0.17246	-0.32277	0.033614
YGR205W		-0.0586353	0.37274	0.379753		YGR093W		-0.0457337	-0.034316	-0.358424
YGR206W		-0.00437801	0.044412	0.190792		YGR094W	VAS1	-0.743015	-0.154252	-0.755176
YGR207C	ETF-BETA	-0.174215	-0.399124	-0.536726		YGR095C	RPR46	-0.163904	-0.240972	-0.471793
YGR208W	SER2	-2.38034	-0.718557	-0.0698459		YGR096W	TPC1	0.522558	0.0683012	0.447007
YGR209C	TRX2	0.511713	0.0848642	0.179791		YGR097W	ASK10	-0.0215123	0.292888	0.285814
YGR210C		0.125334	0.190438	-0.0345691		YGR098C	ESP1	0.350157	0.266607	-0.0635063
YGR211W	ZPR1	-0.2302	0.0795934	-0.225125		YGR099W	TEL2	1.07228	1.4267	-0.780886
YGR212W		-0.0349498	0.463124	0.0696066		YGR101W	PCP1	0.414813	0.416342	0.616746
YGR213C	RTA1	-0.234791	0.34132	1.36137		YGR102C		-0.208604	0.0932759	-0.0031257
YGR214W	RPS0A	1.2257	1.08666	1.13692		YGR103W	NOP7	-0.0906919	-0.885664	-0.352338
YGR215W	RSM27	0.24026	0.155536	0.0978118		YGR104C	SRB5	0.0160317	0.232589	-0.0982328
YGR216C	GPI1	-0.0525695	0.197701	0.149612		YGR105W	VMA21	0.216329	-0.046334	-0.233957
YGR218W	CRM1	-0.190399	0.133048	-0.0773122		YGR106C		-0.209846	-0.144108	-0.360287
YGR221C	TOS2	-0.421831	0.120092	-0.00221685		YGR107W				-1.53727
YGR223C		-0.122533	-0.0169905	-0.29452		YGR108W	CLB1	-0.116645	-0.339018	-0.798906
YGR224W	AZR1	0.259392	0.0904178	-0.0712868		YGR109C	CLB6	0.66834	0.453762	0.742029
YGR226C		-0.138279	-0.162692	-0.624853		YGR110W		0.0283303	0.124673	0.155965
YGR228W		0.267833	-0.299264	-0.0165224		YGR111W		0.960395	1.64082	1.47932
YGR229C	SMI1	0.111155	-0.714463	-0.363277		YGR112W	SHY1	1.2826	1.21013	1.7501
YGR230W	BNS1	-0.733604	0.554606	-1.27651		YGR113W	DAM1	0.393003	0.475184	0.589249
YGR232W	NAS6	0.0229523	-0.093016	-0.0606656		YGR114C		-1.03875	-0.197762	-0.313768
YGR233C	PHO81	1.01268	0.887465	1.08699		YGR115C		-0.367271	-0.159115	0.0172556
YGR234W	YHB1	1.2135	0.315483	0.588311		YGR117C		-0.166604	-0.557928	-0.327901
YGR235C		-0.297952	0.15682	0.119124		YGR118W	RPS23A	-0.246629	-0.118642	-0.372524
YGR236C	SPG1	-0.222413	0.524701	-0.544413		YGR119C	NUP57	0.0676538	0.143429	0.182427
YGR239C	PEX21	0.031506	-0.405146	-0.40294		YGR120C	COG2	0.157085	-0.0310701	0.0487611
YGR240C	PFK1	1.78341	1.86781	1.31903		YGR121C	MEP1	-0.583624	0.144244	-0.0147033
YGR242W		-0.853572	-0.525553	-0.221122		YGR122W		0.876166	0.621689	0.802052
YGR244C	LSC2	-0.109364	0.215902	-0.0629281		YGR123C	PPT1	0.0783349	0.359918	-0.275119
YGR246C	BRF1	-0.388361				YGR124W	ASN2	-0.434416	-0.231624	-0.0950827
YGR247W	CPD1	-0.0866596	-0.0466775	-0.259032		YGR126W		-0.342036	-0.103753	0.081826
YGR248W	SOL4	-0.111262	0.155262	-0.419736		YGR127W		-0.284012	0.0606919	0.157794
YGR249W	MGA1	-0.0410236	0.45169	-0.335102		YGR128C	UTP8	-0.520383	-0.0823367	-1.12193
YGR251W		0.191855	0.0776881	-0.184637		YGR132C	PHB1	0.534712	0.996016	1.28931
YGR252W	GCN5	0.0829163	0.611356	0.534743		YGR133W	PEX4		1.47794	1.4062
YGR253C	PUP2	0.0405613	-0.180757	-0.12572		YGR134W	CAF130	-0.377732	-0.315862	-0.757775
YGR254W	ENO1	0.256005	0.135682	-0.354218		YGR135W	PRE9	-0.506934	0.161962	-0.249349
YGR255C	COQ6	0.060843	0.488062	0.0507671		YGR136W	LSB1	-0.457115	0.0449781	0.0377838
YGR256W	GND2	0.102955	0.0328442	-0.183663		YGR137W		-0.710072	-0.115107	-0.548198
YGR257C		0.560665	0.894493	0.736422		YGR138C	TPO2	-0.404432	-0.407566	0.00304303
YGR258C	RAD2	0.739556	0.764256	0.0234214		YGR140W	CBF2	-0.535054	-0.248319	-1.2358
YGR259C		0.391786	-0.0647162	-0.0187605		YGR141W	VPS62	-0.848129	-0.268114	0.415277
YGR260W	TNA1	0.462702	0.0233203	-0.100691		YGR142W	BTN2	-1.67425	-0.11205	1.06864
YGR262C	BUD32	-0.182891	-0.313234	-0.16331		YGR147C	NAT2	0.863317	0.807097	1.16544
YGR263C		-0.0377926	0.0204623	-0.280667		YGR148C	RPL24B	-0.706037	-0.119087	-1.23908
YGR265W		0.201872	0.106561	-0.252795		YGR149W		-0.536466	0.0950717	0.768556
YGR266W		1.08208	0.11325	0.478562		YGR150C		0.0663784	-0.208319	-0.58166
YGR267C	FOL2	-0.00694143	0.064905	0.178501		YGR151C		-0.716042	0.0765362	-0.222594
YGR268C		-0.103112	0.328469	0.564129		YGR152C	RSR1	0.282735	0.194468	0.233676
YGR269W		0.25706	-0.467994	-0.010192		YGR154C		0.529093	0.296265	0.539606
YGR272C		-0.863314	-5.01144	-0.425266		YGR155W	CYS4	-1.21374	0.06913	-0.56667
YGR273C		0.28296	0.239229	-0.414542		YGR156W	PTI1	-0.287717	0.0246537	-0.0555147
YGR274C	TAF1	-0.0119137	-0.0991019	-0.198387		YGR158C	MTR3	0.007675	0.197872	-0.00595831
YGR276C	RNH70	-0.130562	-0.315292	-0.826826		YGR159C	NSR1	-0.0280949	-0.337844	-0.125317
YGR277C		0.280833	-0.199767	-0.377985		YGR160W		0.26089	-0.387981	-0.315519
YGR278W	CWC22	-0.0589713	0.319507	-0.544856		YGR161C	RTS3	-0.19205	0.249491	0.337683
YGR279C	SCW4	1.32396	0.652401	0.506082		YGR161W-C		0.273453	0.0595881	-0.162713
YGR280C	PXR1	0.774771	0.448016	0.147263		YGR163W	GTR2	0.0310326	-0.163152	0.30304
YGR281W	YOR1	0.890349	0.857371	0.403019		YGR164W			-1.09902	-0.716926
YGR282C	BGL2	0.279244	0.242326	0.03568		YGR165W	MRPS35	0.496853	0.0965122	0.642924
YGR283C		-0.370304	0.133899	-0.181135		YGR166W	KRE11	-0.532715	-0.137759	-0.741546
YGR284C	ERV29	0.15516	0.327589	0.344047		YGR167W	CLC1	-0.17894	0.0704623	-0.142112
YGR285C	ZUO1	0.0356268	-0.224982	-0.229237		YGR168C		0.880423	0.322582	0.94789
YGR286C	BIO2	-0.135506	-0.0477971	0.13826		YGR169C	PUS6	0.30781	-0.0535336	0.0693546
YGR287C		-1.87635	-1.67723	-0.227304		YGR169C-A		-0.483446	-0.326586	-0.484447
YGR288W	MAL13	-0.771299	-0.0123921	0.128646		YGR170W	PSD2	-0.128742	0.360666	0.16423
YGR290W		0.396858	0.167874	-0.971647		YGR171C	MSM1	-0.608804	-0.0450205	-0.703352
YGR294W		-0.150813	0.341158	0.109994		YGR172C	YIP1	-0.173105	0.188495	-0.216497
YHL047C	ARN2	-0.98851	-1.45297	-1.78735		YGR175C	ERG1	-0.42184	-0.619027	-1.18057
YHL046C		-0.204179	0.0108272	-0.156337		YGR176W		-0.799018	-0.0786631	-0.595147
YHL039W		1.16048	-0.241368	0.534793		YGR177C	ATF2	-0.795021	-0.0147702	-0.370009
YHL036W	MUP3	-1.0933	-0.339127	-1.18483		YGR179C	OKP1	0.156105	-0.392827	-0.0168409
YHL034W-A		0.24976	-1.95203	-1.93134		YGR180C	RNR4	0.325038	0.222241	-0.136943
YHL034C	SBP1	0.520561	0.574558	0.324427		YGR181W	TIM13	-0.729792	-0.2391	-0.613742
YHL033C	RPL4A	0.467304	-0.0485072	0.272847		YGR182C		-0.666106	0.0837317	-0.628883
YHL032C	GUT1	-0.198433	-1.75182	0.0359992		YGR183C	QCR9	-0.467419	-0.104078	0.0692224
YHL031C	GOS1	-0.0859352	-0.348838	0.157195		YGR185C	TYS1	-0.373846	0.042787	-0.222895
YHL029C		0.261576	-0.213834	-0.425502		YGR187C	HGH1	-0.0726088	0.150201	0.139913
YHL028W	WSC4	1.28532	0.011759	-0.578297		YGR188C	BUB1	-0.242283	-0.153338	-0.210756
YHL027W	RIM101	0.0176113	-0.179069	-0.445111		YGR189C	CRH1	-0.21503	0.563914	-0.320939
YHL026C		0.211848	0.362652	0.126478		YGR190C		0.0187722	-0.397199	-0.101313
YHL025W	SNF6	0.982017	0.501763	0.381509		YGR191W	HIP1	-0.0064984	-0.450742	-0.0345883
YHL024W	RIM4	-0.665581	-0.887862	-3.75097		YGR192C	TDH3	0.523064	0.532908	0.23877
YHL023C	RMD11	-0.213117	-0.121818	-0.190697		YGR193C	PDX1	-0.207594	0.0760408	0.0723539
YHL021C		-0.443255	0.309273	0.157155		YGR194C	XKS1	-0.199568	-0.787123	0.269393
YHL020C	OPI1	0.00400416	0.161963	1.00907		YGR195W	SKI6	-0.151411	-0.19076	-0.254958
YHL019C	APM2	-0.57726	-0.873959	-0.535143		YGR197C	SNG1	0.262743	-0.564436	0.168323
YHL018W		-0.404527	0.104601	-0.00248546		YGR200C	ELP2	-0.407994	-3.43217	-0.0539826
YHL017W		-1.17953	0.398405	0.448535		YGR202C	PCT1	-0.0610463	-0.375753	0.192536
YHL015W	RPS20	0.451377	-0.417575	0.0506777		YGR203W	HUR1	-0.441839	-0.130221	-0.136797
YHL014C	YLF2	0.754922	0.520373	0.273953		YGR204W	ADE3	-0.202729	-0.0446338	-0.125126
YHL012W		0.110102	0.962041	0.70329		YGR205W		-0.0560662	0.122183	0.505
YHL011C	PRS3	0.0733659	-0.416025	0.0418179		YGR206W		-0.534439	0.114584	-0.397757
YHL010C		0.0957192	0.10575	-0.0554179		YGR207C	ETF-BETA	0.172447	0.0488245	0.0962812
YHL009C	YAP3	0.279305	0.426584	0.209151		YGR208W	SER2	-1.02706	-0.121097	0.37742
YHL007C	STE20	0.358822	-0.122795	-0.372115		YGR209C	TRX2	0.374965	0.107375	0.0926265
YHL004W	MRP4	1.18157	0.348899	0.250625		YGR210C		-0.18599	-0.313335	0.177661
YHL003C	LAG1	0.0567816	0.142073	-0.122327		YGR211W	ZPR1	-0.561078	-0.503695	0.499766
YHL002W	HSE1	-0.0776276	-0.240932	-0.453534		YGR212W		-0.314024	-0.179666	-0.114472
YHL001W	RPL14B	1.01608	0.463758	0.902296		YGR213C	RTA1	0.521644	0.412134	0.775531
YHR001W	OSH7	-0.132756	-0.168843	-0.44563		YGR214W	RPS0A	0.339202	0.842808	0.360256
YHR002W	LEU5	0.737159	0.857191	0.682407		YGR215W	RSM27	-0.212367	0.0186584	0.252844
YHR003C		0.199612	-0.350126	-0.334344		YGR216C	GPI1	-0.571712	0.00848063	-0.919327
YHR004C	NEM1	0.157563	0.00244213	-0.456348		YGR218W	CRM1	-0.435248	-0.113059	-0.734956
YHR005C	GPA1	1.8866	-0.114058	0.155034		YGR221C	TOS2	-0.199082	-0.43312	0.0342081
YHR006W	STP2	-1.879	-0.0511981	-0.599093		YGR223C		-0.053071	-0.114762	-0.13863
YHR007C	ERG11	0.59276	-0.173335	0.0454981		YGR224W	AZR1	-0.481788	-0.0753946	-0.603169
YHR008C	SOD2	0.433328	0.0233988	0.00661188		YGR226C		-0.0106353	0.117003	0.159608
YHR009C		0.236252	0.136368	-0.0467272		YGR228W		0.322432	0.170969	-0.105927
YHR010W	RPL27A	0.928612	0.500272	0.855068		YGR229C	SMI1	-0.0433059	-0.253711	-0.430869
YHR011W	DIA4	-0.0974198	-0.37583	-0.316472		YGR230W	BNS1	0.367309	0.690233	0.244188
YHR012W	VPS29	-0.888021	-0.093506	0.189456		YGR232W	NAS6	0.0968954	0.0636611	-0.0665726
YHR013C	ARD1	-0.159943	-0.246471	0.0180219		YGR233C	PHO81	0.0204604	0.229042	0.216781
YHR016C	YSC84	-0.437624	0.266625	-0.0625558		YGR234W	YHB1	0.179725	0.391923	-0.243234
YHR017W	YSC83	0.378457	0.816358	0.381043		YGR235C		0.207747	0.172161	-0.0722752
YHR018C	ARG4	0.164231	0.691061	0.170965		YGR236C	SPG1	0.120384	0.141034	0.15453
YHR019C	DED81	0.398705	0.116623	-0.0672096		YGR238C	KEL2	-0.940418	2.16453	-1.64938
YHR020W		0.276253	-0.910793	-0.256731		YGR239C	PEX21	0.437585	-0.36911	-0.0316939
YHR021C	RPS27B	0.176642	-0.283924	0.149711		YGR240C	PFK1	0.641111	0.848896	0.441987
YHR022C		-0.884236	0.017954	-0.571999		YGR242W		0.704838	0.248336	0.611105
YHR024C	MAS2	-0.0852874	0.596709	0.263724		YGR244C	LSC2	0.348217	-0.0324991	0.39127
YHR025W	THR1	0.581571	0.813258	1.11025		YGR246C	BRF1	0.68088	0.31271	0.520159
YHR026W	PPA1	-0.0749303	-0.357197	-0.447097		YGR247W	CPD1	-0.212176	0.0410796	0.673488
YHR027C	RPN1	-0.233963	-0.034124	-0.5704		YGR248W	SOL4	-0.964315	0.323488	0.981131
YHR029C		-0.103209	0.257277	-0.095009		YGR249W	MGA1	-0.637105	-0.179662	0.389183
YHR030C	SLT2	-0.375849	0.501084	0.143145		YGR251W		0.154681	-0.178627	0.334961
YHR032W	ERC1	0.557406	-0.209286	-0.0496626		YGR252W	GCN5	0.507054	0.377166	0.22445
YHR033W		0.496693	0.141485	-0.265641		YGR253C	PUP2	-0.0401275	-0.116024	-0.0484251
YHR034C		0.325583	0.785407	0.868334		YGR254W	ENO1	-0.314698	-0.471689	-0.453544
YHR035W		0.531766	-0.540922	0.269654		YGR255C	COQ6	-0.186322	-0.135517	-0.0640343
YHR036W		0.0649405	0.631362	-0.208034		YGR256W	GND2	0.326805	-0.344399	-0.165796
YHR039C-A	VMA10	-0.0624338	-0.359195	0.347512		YGR257C		0.870497	0.603898	0.948406
YHR040W	BCD1	0.887868	0.412062	0.850071		YGR258C	RAD2	-0.22028	0.335096	-0.100469
YHR041C	SRB2	0.0762889	-0.412338	-0.00206847		YGR259C		-0.284825	-1.13506	-0.609061
YHR042W	NCP1	0.694846	-0.190875	-0.148588		YGR260W	TNA1	-0.40377	-1.20498	-0.692081
YHR043C	DOG2	-0.189162	-0.0660989	-0.37915		YGR262C	BUD32	-0.0112464	0.048778	-0.0755481
YHR044C	DOG1	-0.363928	0.283468	-0.670196		YGR263C		-0.169836	-0.273634	-0.243047
YHR045W		0.0822901	0.080126	-0.695659		YGR265W		0.736203	0.161522	0.143778
YHR046C	INM1	0.426099	0.410249	-0.805936		YGR266W		-1.89025	-0.823513	-4.05124
YHR048W		0.9837	0.795718	0.694028		YGR267C	FOL2	-0.356516	0.0794282	-0.281291
YHR049W	FSH1	0.0959073	-0.286806	0.180978		YGR268C		-0.146158	0.271697	0.350133
YHR050W	SMF2	0.114157	0.0899783	0.0217618		YGR269W		0.12394	-0.0283308	0.251606
YHR052W	CIC1	0.21868	-0.594145	-0.393788		YGR272C		-0.390635	0.209634	-0.348545
YHR053C	CUP1-1	-0.544733	0.173216	-0.241882		YGR273C		0.828131	0.686104	0.36595
YHR054C		-0.471847	0.0219304	0.00725111		YGR274C	TAF1	-0.122218	-0.260267	-0.225455
YHR057C	CPR2	-0.0289415	0.025391	-0.148013		YGR276C	RNH70	-0.255742	-0.331446	-0.306775
YHR058C	MED6	-0.130147	0.173581	0.0864433		YGR277C		-0.358732	0.0468394	0.148886
YHR059W	FYV4	-0.185244	0.109323	-0.037709		YGR278W	CWC22	0.34573	0.351476	-0.22844
YHR061C	GIC1	-0.132966	-0.750214	-0.335875		YGR279C	SCW4	0.529063	0.371671	0.167509
YHR062C	RPP1	0.109428	-0.324407	0.200451		YGR280C	PXR1	-0.462911	-0.255666	-0.530589
YHR063C	PAN5	0.26458	-0.297385	0.23872		YGR281W	YOR1	-0.341482	-0.200987	-1.1763
YHR064C	SSZ1	0.441168	-0.259248	0.128474		YGR282C	BGL2	0.219135	0.428009	0.198519
YHR065C	RRP3	-0.0402456	-0.722575	-0.104292		YGR283C		0.249884	0.279302	0.298431
YHR066W	SSF1	0.154384	-0.260616	-0.18603		YGR284C	ERV29	0.813571	0.422076	1.25936
YHR067W		-0.29493	0.092134	0.0594255		YGR285C	ZUO1	0.0610407	-0.357305	-0.175665
YHR068W	DYS1	1.1077	0.219975	0.318886		YGR286C	BIO2	0.128174	-0.205188	0.0100784
YHR069C	RRP4	0.578275	-0.0449531	0.0476319		YGR287C		-1.28381	-0.861836	-0.0602984
YHR069C-A		-0.216991	-1.0703	-0.759783		YGR288W	MAL13	-0.239628	-0.14541	0.407331
YHR070W	TRM5	-0.172793	0.18667	0.750702		YGR289C	MAL11	-3.42021		-0.817714
YHR071W	PCL5	0.535027	0.727609	0.933898		YGR290W		0.614652	-0.0325438	0.542968
YHR072W	ERG7	0.21303	-0.188813	-0.239615		YGR292W	MAL12	-0.183956	-2.14722	-0.694663
YHR072W-A	NOP10	0.470956				YGR293C		-0.635802	-0.8875	-1.93328
YHR073W	OSH3	0.442285	0.336638	0.0631265		YGR294W		-0.0357135	0.0607529	0.339112
YHR076W	PTC7	1.40138	1.05938	1.04955		YHL047C	ARN2	0.991989	-0.709861	-0.766713
YHR077C	NMD2	-0.326058	-0.341668	-0.415396		YHL046C		-0.110064	-0.0751759	-0.0785319
YHR078W		0.259581	0.333912	-1.22036		YHL041W		1.4103	0.531999	0.677933
YHR079C	IRE1	-0.209751	-0.122645	-0.0671227		YHL040C	ARN1	1.07452	-0.0399833	0.525986
YHR081W	LRP1	-0.231369	0.0786965	0.32144		YHL039W		0.640356	-0.51984	-0.362134
YHR083W		-0.111184	-0.135225	0.0402651		YHL036W	MUP3	0.639676	-0.371875	1.14156
YHR084W	STE12	-0.151921		-1.75967		YHL035C	VMR1	0.672449	0.0649095	0.865269
YHR085W	IPI1	0.0429839	-0.226192	-0.000708951		YHL034W-A		1.06223	-1.75867	1.14135
YHR086W	NAM8	-0.762732	0.0447065	0.380593		YHL034C	SBP1	1.14706	0.462609	0.701036
YHR087W	RTC3	0.531227	0.428915	-1.02203		YHL033C	RPL4A	1.2187	0.446736	0.447748
YHR090C	YNG2	0.774119	0.713248	0.477943		YHL032C	GUT1	1.18659	-0.177944	0.950972
YHR091C	MSR1	0.26776	-0.46406	-0.314433		YHL031C	GOS1	0.729175	-0.0424149	0.695321
YHR094C	HXT1	0.525571	0.144736	-0.780611		YHL029C		0.563341	-0.0498574	-0.234234
YHR095W		0.0213364	0.227292	-0.357856		YHL028W	WSC4	0.257335	-0.787953	-0.594097
YHR096C	HXT5	0.106313	0.422787	-0.672367		YHL027W	RIM101	0.479166	-0.560607	0.268628
YHR097C		0.214884	0.962929	1.07365		YHL026C		1.3741	-0.215738	0.904059
YHR100C		0.202389	-0.169418	-0.0691214		YHL025W	SNF6	1.75444	0.24187	1.26751
YHR101C	BIG1	0.444297	0.153685	0.349541		YHL024W	RIM4	-0.66198	-1.52154	0.374216
YHR102W	KIC1	0.251202	-0.169034	-0.315875		YHL023C	RMD11	0.269329	0.0919459	0.168682
YHR103W	SBE22	-0.451027	-0.623483	-0.987123		YHL021C		0.322925	-0.135905	1.01507
YHR104W	GRE3	-0.0651421	0.423683	-0.177979		YHL020C	OPI1	0.581987	0.0957982	1.7459
YHR105W	YPT35	-0.886851	0.0993349	-0.016113		YHL019C	APM2	0.63192	-0.223347	0.249627
YHR106W	TRR2	0.763804	0.690345	0.937204		YHL018W		1.37876	0.112712	0.888782
YHR107C	CDC12	0.64374	0.531844	0.753387		YHL017W		-0.936923	0.221207	0.741829
YHR108W	GGA2	-0.0124326	-1.05665	-0.427839		YHL015W	RPS20	0.0169949	-0.130933	-0.852436
YHR109W	CTM1	-0.0377388	-0.443975	-0.0142333		YHL014C	YLF2	0.763787	0.410146	0.0724825
YHR111W		-0.0260382	-0.38469	-0.345542		YHL012W		1.13428	-1.15548	-0.127702
YHR112C		0.222966	1.26856	0.892516		YHL011C	PRS3	1.32162	0.0367564	0.358028
YHR113W		-0.416404	0.173718	-0.277708		YHL010C		0.538765	0.0385846	0.437236
YHR114W	BZZ1	-0.410489	0.148845	-0.199626		YHL009C	YAP3	1.08266	-0.0400839	0.908123
YHR115C		-0.000625684	-0.470874	-0.229835		YHL008C		0.201439		0.491434
YHR117W	TOM71	0.541284	0.209417	0.217658		YHL007C	STE20	0.97237	-0.294524	0.0878404
YHR118C	ORC6	-1.4468	0.121226	0.2517		YHL004W	MRP4	0.560449	0.0163461	0.101306
YHR120W	MSH1	0.333563	-0.356359	-0.927169		YHL003C	LAG1	0.298916	-0.269317	0.20498
YHR121W		0.366109	0.617935	0.306509		YHL002W	HSE1	0.606256	-0.359842	0.226753
YHR122W		-0.0533963	0.0714524	0.244136		YHL001W	RPL14B	0.560051	0.59128	0.443018
YHR123W	EPT1	-0.644909	-0.195156	-0.696581		YHR001W	OSH7	0.425889	-0.241625	0.267615
YHR126C		-0.41735	-1.5668	-1.08837		YHR002W	LEU5	1.1899	0.424211	1.13393
YHR127W	HSN1	-0.0723035	-0.495496	-0.220012		YHR003C		0.703353	-0.447534	0.19735
YHR128W	FUR1	0.842092	-0.352711	-0.242356		YHR004C	NEM1	0.336834	-0.355287	-0.131238
YHR129C	ARP1	-0.467421	-3.09803	-0.110468		YHR005C	GPA1	0.73711	-1.99688	-1.28791
YHR130C		0.202626	-0.258826	-0.344562		YHR006W	STP2	-1.48482	0.571949	0.179692
YHR132C	ECM14		0.0223413	0.311036		YHR007C	ERG11	0.221511	-0.243659	-0.512716
YHR133C		-0.190332	0.0230637	-0.0428361		YHR008C	SOD2	0.840656	0.179372	0.4315
YHR134W	WSS1	-0.414274	-0.22516	0.23905		YHR009C		0.40155	-0.0925624	0.648626
YHR135C	YCK1	0.0117292	-0.376483	-0.00198135		YHR010W	RPL27A	0.793391	0.615005	0.462021
YHR137W	ARO9		-0.440933	0.719007		YHR011W	DIA4	0.838032	-0.178779	0.612908
YHR140W		0.227365	0.342462	-0.0720856		YHR012W	VPS29	0.389521	0.583018	0.978284
YHR143W	DSE2	1.13584	0.633814	-0.0575761		YHR013C	ARD1	0.258129	-0.140456	0.298956
YHR144C	DCD1	0.630189	-0.938606	0.212796		YHR015W	MIP6	1.02156	0.865028	0.240739
YHR145C		0.0280994	0.339098	-0.569343		YHR016C	YSC84	0.970964	0.476396	1.3369
YHR146W	CRP1	-0.334488	0.386376	0.624609		YHR017W	YSC83	1.53083	0.30154	1.51868
YHR147C	MRPL6	-0.0243864	-0.37542	-0.234007		YHR018C	ARG4	-0.180283	-0.295524	0.167564
YHR148W	IMP3	0.394378	-0.0020468	0.264836		YHR019C	DED81	-0.365239	-0.0141273	-0.552527
YHR150W	PEX28	-0.388266	-0.0887453	-0.0319516		YHR020W		0.102646	-0.135628	-0.602419
YHR151C		0.22941	-0.496071	-0.14401		YHR021C	RPS27B	0.840287	-0.173445	0.232149
YHR154W	RTT107	0.112838	-0.69043	-0.870402		YHR022C		0.208229	0.256363	0.502493
YHR155W	YSP1	-0.0826478	-0.0835459	0.128136		YHR024C	MAS2	0.123464	-0.028448	0.344658
YHR156C	LIN1	0.251989	0.492025	0.479817		YHR025W	THR1	0.458865	0.667254	0.686713
YHR157W	REC104	-0.588873	-1.26848	-0.433915		YHR026W	PPA1	1.01955	-0.124443	0.381674
YHR158C	KEL1	1.07592	0.199823	0.681605		YHR027C	RPN1	0.84852	-0.379957	0.324563
YHR159W		0.824374	-0.265423	-0.139151		YHR029C		-0.127496	0.680853	0.866665
YHR164C	DNA2	-0.825823	-2.1833	-0.458071		YHR030C	SLT2	0.220347	0.0276056	0.331471
YHR166C	CDC23	-0.368006	0.0755673	0.239721		YHR031C	RRM3	0.653007	-0.541098	0.817906
YHR167W	THP2	-0.0539134	-0.0392236	-0.144685		YHR032W	ERC1	1.23764	-0.603704	0.179643
YHR168W		-0.0260789	1.0522	1.58878		YHR033W		0.690443	-0.369797	-0.347121
YHR169W	DBP8	0.167748	-0.71243	-0.269744		YHR034C		0.771864	0.279863	0.793056
YHR170W	NMD3	-1.59743	-0.844626	0.442048		YHR035W		1.0328	-0.0418663	0.583134
YHR171W	APG7	0.699023	0.15235	-0.0662893		YHR036W		0.712834	-0.302218	0.283934
YHR172W	SPC97	-1.87894	0.527698			YHR039C-A	VMA10	0.00610581	0.243061	-0.565082
YHR174W	ENO2	-0.0280526	0.889596	0.518613		YHR040W	BCD1	0.838694	-0.158029	0.677893
YHR175W	CTR2	-0.00798558	0.409364	-0.0685398		YHR041C	SRB2	-0.125428	0.00530453	-0.0639298
YHR176W	FMO	0.699607	0.377615	0.604308		YHR042W	NCP1	0.154693	-0.0754506	0.092216
YHR177W	GON3	0.28105	0.0420996	-0.249401		YHR043C	DOG2	1.32882	-0.162552	0.732014
YHR179W	OYE2	1.16401	1.03777	1.00337		YHR044C	DOG1	1.64904	-0.224894	1.12517
YHR182W		0.264801	-0.315353	-0.0585184		YHR045W		0.932603	-0.083755	0.355706
YHR183W	GND1	0.12438	-0.110141	-0.00924615		YHR046C	INM1	1.27455	-0.499428	0.777147
YHR184W	SSP1	-2.30431	-0.188543	-3.651		YHR048W		1.08097	-0.551022	0.234071
YHR186C		0.497323	0.0733087	1.11201		YHR049W	FSH1	0.747509	-0.215638	0.232929
YHR188C	GPI16	-0.197684	-0.0409537	-0.300397		YHR050W	SMF2	0.947903	-0.420972	0.371995
YHR190W	ERG9	-0.494454	0.110091	0.636714		YHR052W	CIC1	0.749107	-0.585331	-0.344005
YHR191C	CTF8	-0.538695	0.474389	0.338498		YHR053C	CUP1-1	-0.794749	-0.385878	0.570196
YHR192W		-0.0181689	0.228597	0.203407		YHR054C		0.00421988	-0.475991	0.311597
YHR193C	EGD2	0.00256658	-0.56554	-0.620953		YHR056C	RSC30			-2.18157
YHR194W	MDM31	-0.247598	0.0248273	-0.506697		YHR057C	CPR2	0.705157	-0.284359	0.191107
YHR195W	NVJ1	-0.026748	-0.0355252	0.219083		YHR058C	MED6	0.757348	0.053684	0.772915
YHR197W	IPI2	0.169438	0.516378	0.900726		YHR059W	FYV4	0.188141	-0.182795	-0.0456764
YHR198C		0.467641	0.354554	0.214505		YHR061C	GIC1	1.52032	-0.0830389	0.97397
YHR199C		0.521159	0.314071	0.323176		YHR062C	RPP1	1.25642	0.088597	0.709286
YHR201C	PPX1	1.14902	0.656916	0.683729		YHR063C	PAN5	0.833063	0.244227	0.49558
YHR202W		-0.111316	-0.024626	-0.0700277		YHR064C	SSZ1	0.40526	-0.328317	-0.402285
YHR203C		1.29119	0.461113	0.942208		YHR065C	RRP3	0.868974	-0.218182	0.381223
YHR207C	SET5	-0.364404	-0.150758	-0.451907		YHR066W	SSF1	0.363441	-0.410441	-0.0662494
YHR208W	BAT1	0.693587	-0.434842	0.169622		YHR067W		0.864522	0.194804	0.799845
[truncated: 2,846 more rows]

## Sheet: RA
ORF name	Gene name	logFC A6863	logFC A18345	logFC A18349		ORF name	Gene name	logFC A13628	logFC A18346	logFC A18347
YAL067C	SEO1	-0.849273				YAL065C		0.264873	0.0525748	-0.227849
YAL065C		-0.248905	-0.107034	-2.30818		YAL064C-A		0.0385739	-0.623843	-0.439026
YAL064C-A		-0.265412	-0.139587	0.0821994		YAL063C	FLO9	0.523879	0.279653	0.645399
YAL063C	FLO9	-0.775111	-0.107566	-1.48027		YAL062W	GDH3	0.458262	0.475901	0.0233477
YAL062W	GDH3	0.415394	-0.592024	0.203959		YAL061W		0.720086	1.50873	0.535475
YAL061W		1.73038	1.93342	0.593771		YAL060W	BDH1	-0.936298	-0.070967	-0.800108
YAL060W	BDH1	1.27465	0.145856	-0.342013		YAL059W	ECM1	-0.394303	-0.232162	-0.297714
YAL059W	ECM1	0.0712819	0.148904	-0.0858605		YAL058W	CNE1	-0.330605	-0.105247	-0.771724
YAL058W	CNE1	0.876374	0.0563922	0.137145		YAL053W		0.516128	0.144877	0.511323
YAL053W		0.414833	0.0900006	-0.409854		YAL051W	OAF1	-0.105672	-0.370671	-0.0374032
YAL051W	OAF1	0.916445	0.46535	-0.31328		YAL049C		-0.0695475	0.0498077	-0.0755513
YAL049C		1.00727	0.271183	0.418339		YAL047C	SPC72	0.758528	1.13834	-0.110048
YAL047C	SPC72	1.09089	-0.157288	-0.205321		YAL045C		-0.119644	0.647992	0.893254
YAL045C		2.75085	1.47208			YAL044C	GCV3	0.133702	0.184503	-0.186577
YAL044C	GCV3	1.04962	0.139915	0.194374		YAL043C	PTA1	-3.41469	-1.21552	-1.95974
YAL043C	PTA1	0.401561	-0.778284	0.0300078		YAL042W	ERV46	-0.472357	-0.0749242	-0.107593
YAL042W	ERV46	0.714621	-0.14748	0.695868		YAL041W	CDC24		-1.77271	-0.564291
YAL041W	CDC24	-0.437297	1.73626	-0.153086		YAL040C	CLN3	-0.31164	-0.287381	0.115385
YAL040C	CLN3	0.105728	-1.00057	-0.0899138		YAL039C	CYC3	-0.228713	0.59153	0.064331
YAL039C	CYC3	1.00979	0.800906	0.355668		YAL038W	CDC19	0.175052	-0.497485	-0.153578
YAL038W	CDC19	-0.407607	-0.503463	-1.6003		YAL037W		1.98875	0.36362	3.38653
YAL037W		2.88775	2.27599	1.18858		YAL036C	FUN11	0.192221	-0.0790408	0.312658
YAL036C	FUN11	0.713251	-0.0611836	0.616615		YAL035W	FUN12	-0.411358	0.247073	0.783597
YAL035W	FUN12	0.157676	-0.373149	0.808322		YAL034W-A	MTW1	0.0899264	-0.0147005	-0.253848
YAL034W-A	MTW1	1.03472	0.621848	0.179957		YAL033W	POP5	-0.862321	-0.176392	-0.587512
YAL033W	POP5	0.336451	-0.256349	-0.475506		YAL032C	PRP45	1.83069	1.82098	1.27992
YAL032C	PRP45	1.67207	2.56138	0.770882		YAL031C	FUN21	0.744403	-0.62377	-0.277008
YAL031C	FUN21	2.18618	1.08665	0.516333		YAL030W	SNC1	-0.0435409	1.67268	0.990148
YAL030W	SNC1	0.591515	0.105881	-0.821884		YAL029C	MYO4	-0.00879699	-0.0244878	-0.132394
YAL029C	MYO4	0.0216083	-0.74344	-0.220088		YAL027W		-0.074418	0.435722	0.433976
YAL027W		0.501577	0.145912	-0.267558		YAL025C	MAK16	0.330626	-0.436327	0.184852
YAL025C	MAK16	0.515951	0.554732	-0.0616665		YAL024C	LTE1	0.205111	-0.0228523	0.106339
YAL024C	LTE1	0.502805	-0.0924244	0.403766		YAL023C	PMT2	0.458079	0.0136315	0.187158
YAL023C	PMT2	0.39296	0.222322	-0.341199		YAL022C	FUN26	-0.117014	0.495319	-0.228306
YAL022C	FUN26	1.09892	0.565214	-0.240342		YAL021C	CCR4	1.58398	0.202572	0.225583
YAL020C	ATS1	1.73424	0.450695	0.634971		YAL020C	ATS1	0.319008	-0.606447	-0.569224
YAL019W	FUN30	0.875627	0.309619	0.179425		YAL019W	FUN30	0.550746	-0.121948	0.199943
YAL017W	FUN31	1.42351	0.511466	0.378977		YAL017W	FUN31	-0.110739	-0.258855	-0.635472
YAL016W	TPD3	1.23253	0.615005	-0.205587		YAL016W	TPD3	0.0024224	-0.109425	-0.276229
YAL015C	NTG1	0.763091	0.420039	0.660362		YAL015C	NTG1	0.362712	0.910069	0.935298
YAL014C	SYN8	-0.127615	1.93996	-3.26439		YAL014C	SYN8	0.522007	-0.422389	-2.59882
YAL013W	DEP1	1.89487	0.603611	0.317921		YAL013W	DEP1	0.256022	-0.165486	-0.456485
YAL012W	CYS3	1.01349	-0.161625	-0.899551		YAL012W	CYS3	0.0878508	-0.426543	-1.11904
YAL011W	SWC1	2.14342	0.985984	1.06198		YAL011W	SWC1	0.425641	0.241313	0.456192
YAL009W	SPO7	0.868277	0.358956	-0.245212		YAL009W	SPO7	0.0378271	0.542896	0.0942159
YAL007C	ERP2	0.176808	0.620857	-1.83185		YAL007C	ERP2	0.123969	0.0822943	0.140839
YAL005C	SSA1	0.264267	0.323419	-1.33982		YAL005C	SSA1	1.06819	-0.276012	-0.22191
YAL004W		-0.212765	-0.244255	-1.67601		YAL004W		-0.252466	-0.698989	-0.898248
YAL003W	EFB1	0.458472	0.092924	-0.292923		YAL003W	EFB1	0.348506	-0.479118	-0.0250144
YAL002W	VPS8	1.13076	1.18321	0.716929		YAL002W	VPS8	0.165027	0.256483	0.18076
YAL001C	TFC3	0.469377	0.424641	-1.30481		YAL001C	TFC3	-0.14555	-0.170784	-0.447886
YAR002C-A	ERP1	1.02103	-0.151497	0.16724		YAR002C-A	ERP1	0.608133	-0.0947833	-0.841037
YAR003W	SWD1	1.08409	-0.20345	0.695304		YAR003W	SWD1	-0.0469591	0.0322731	-0.0129761
YAR007C	RFA1	0.485344	-0.20987	-1.39521		YAR007C	RFA1	0.181463	1.328	0.0729517
YAR008W	SEN34	0.954781	0.0516019	0.9247		YAR008W	SEN34	0.173153	0.259544	0.185162
YAR009C						YAR009C
YAR010C		0.0428482	-0.363361	0.507905		YAR010C		-0.624661	0.269682	0.467441
YAR015W	ADE1	-2.48023		-0.375911		YAR015W	ADE1	0.232154	-0.320657	-0.363514
YAR019C	CDC15	0.932339	0.466334	0.504191		YAR019C	CDC15	0.602329	0.531841	0.863944
YAR023C		-0.585375	-0.0883099	-0.590417		YAR020C	PAU7		0.302301	0.873184
YAR027W	UIP3	1.14544	1.09863	0.25304		YAR023C		-0.416602	-0.116822	0.193731
YAR029W	FUN57	-0.569332	-0.280624	-0.0646108		YAR027W	UIP3	0.16366	0.603724	0.417011
YAR031W	PRM9	0.0949132	0.392221	0.663681		YAR029W	FUN57	-0.253709	-0.0565702	0.409903
YAR033W	MST28	1.08131	0.302312	0.250242		YAR031W	PRM9	0.172262	0.175544	0.526071
YAR035W	YAT1	1.56866	0.658738	0.558165		YAR033W	MST28	-1.26138	-0.237611	-0.203246
YAR042W	SWH1	1.72404	1.97824	1.19046		YAR035W	YAT1	0.495647	-0.504909	0.839874
YAR044W	OSH1	1.87735	0.769986	-0.00112778		YAR042W	SWH1	0.86123	0.418435	1.09201
YAR050W	FLO1	-0.47493	-0.0797968	-0.568505		YAR044W	OSH1	1.37599	1.0905	1.09711
YAR053W		0.00789374	-0.41003	0.0999835		YAR050W	FLO1	0.681276	-0.0581641	0.481255
YAR064W		0.283986	0.278363	0.4569		YAR053W		-0.522051	-0.234513	-0.142462
YAR068W		0.471579	0.339492	0.261959		YAR064W		-0.306478	-0.263783	-0.245065
YAR069C		0.298944	0.874733	-0.132133		YAR068W		0.695791	-0.00230869	0.211848
YAR071W	PHO11	-1.14032	-1.09059	-0.712588		YAR069C		-1.75025	0.237027	-0.762943
YAR073W	IMD1	0.262659	-0.0535285	-0.290505		YAR071W	PHO11	0.583895	-0.526962	0.235347
YBL106C	SRO77	-0.429079	-0.125046	0.313551		YAR073W	IMD1	0.89684	-0.13516	-0.153902
YBL105C	PKC1	-0.148827	0.285538	0.215959		YBL106C	SRO77	0.608578	0.916202	0.55797
YBL104C		0.745516	0.657148	1.59724		YBL105C	PKC1	0.415988	0.361684	0.255706
YBL103C	RTG3	-1.02999	-0.0988219	0.0274737		YBL104C		1.84968	3.33703	3.6604
YBL102W	SFT2	0.129138	-0.2148	0.443767		YBL103C	RTG3	0.736618	1.23005	0.801253
YBL101C	ECM21	-1.68493	0.68917	-0.388973		YBL102W	SFT2	-0.626051	-0.166774	0.0543313
YBL100C		0.80373	-1.05341	0.0278497		YBL101C	ECM21	-2.51444	-1.40405	-1.69617
YBL099W	ATP1	0.100013	0.23596	-0.545635		YBL100C		0.572114	1.46957	1.01041
YBL098W	BNA4	-0.149269	-3.51251	-0.492617		YBL099W	ATP1	-0.245866	-0.286376	-0.220617
YBL096C		0.0812666	-0.928431	-1.63254		YBL098W	BNA4	-0.0783715	0.232759	0.214259
YBL095W		0.121727	-0.332191	0.175569		YBL096C		1.02727	0.735689	1.2792
YBL093C	ROX3	0.500319	0.284343	0.123834		YBL095W		-0.234677	0.127492	0.264493
YBL092W	RPL32	-0.32017	-0.221505	0.0127934		YBL093C	ROX3	0.237757	-0.247447	-0.453414
YBL091C	MAP2	0.287473	-0.073085	0.590654		YBL092W	RPL32	-0.215314	-0.51126	0.403796
YBL090W	MRP21	-0.28967	-0.00400007	-0.053209		YBL091C	MAP2	0.0994003	0.0542887	0.165757
YBL087C	RPL23A	0.0887654	-0.237217	0.372703		YBL090W	MRP21	-0.997611	0.15269	-0.405223
YBL086C		0.715197	-0.640476	0.426984		YBL087C	RPL23A	0.00263134	-0.182244	0.118199
YBL085W	BOI1	-0.169731	0.0778586	0.166863		YBL086C		-0.345384	0.146712	-0.253492
YBL083C		-1.10022	-0.116749	-1.3959		YBL085W	BOI1	0.0560828	0.0124982	0.112705
YBL082C	RHK1	0.733449	0.199329	0.226305		YBL083C		0.709322	0.905282	0.759301
YBL081W		-0.42524	-0.752394	-0.347163		YBL082C	RHK1	0.0808151	0.0347399	0.0914737
YBL080C	PET112	0.556359	0.300664	0.56373		YBL081W		-0.0362561	-0.241607	-0.208947
YBL079W	NUP170	0.0905118	-0.427479	0.540173		YBL080C	PET112	-0.0285839	0.252346	-0.106805
YBL077W		-0.660032	-0.0972159	-0.566555		YBL079W	NUP170	0.0351098	0.135563	0.245217
YBL076C	ILS1	-0.643721	-0.187704	-0.668545		YBL077W		-0.263309	-0.134266	0.102569
YBL074C	AAR2	-0.739867	-0.56577	-0.495913		YBL076C	ILS1	0.027573	-0.160378	0.0918216
YBL072C	RPS8A	-0.626152	0.0851218	-0.897613		YBL074C	AAR2	0.67657	1.26115	1.18824
YBL069W	AST1	1.21064	1.84387	-0.262496		YBL073W		-4.52175	0.672226	-1.02222
YBL068W	PRS4	-0.288946	0.0924579	-0.363848		YBL072C	RPS8A	-0.0427716	-0.678291	-0.017223
YBL067C	UBP13	-0.869916	0.286263	-0.314402		YBL069W	AST1	0.219442	0.535753	0.451332
YBL066C	SEF1	0.364516	-0.201679	0.645589		YBL068W	PRS4	0.113551	-0.107876	0.0748416
YBL064C	PRX1	1.41056	0.369051	1.14231		YBL066C	SEF1	0.328251	-0.0120088	-0.450147
YBL063W	KIP1	-0.254827	0.022939	-0.539109		YBL064C	PRX1	-0.663365	-0.383101	-0.766668
YBL062W		-0.301751	-0.43692	-0.476171		YBL063W	KIP1	0.111592	-0.0618792	0.141136
YBL059W		0.268633	0.355319	0.135953		YBL062W		-0.110982	0.139827	0.482017
YBL058W	SHP1	0.341808	-0.234231	0.607795		YBL059W		-1.41238	0.365563	0.126183
YBL057C	PTH2	-0.730753	0.896237	-0.14054		YBL058W	SHP1	-0.251093	-0.177114	-0.0154625
YBL056W	PTC3	-0.137404	-0.0144242	0.211753		YBL057C	PTH2		1.90042	0.924852
YBL055C		0.0697065	-0.312968	0.317128		YBL056W	PTC3	0.229042	0.228246	0.206415
YBL053W		-0.0667315	-0.325761	0.134641		YBL055C		-0.128838	-0.102246	0.0164756
YBL052C	SAS3	-0.110388	-0.00370912	-0.0183874		YBL053W		-0.43713	-0.327822	-0.411759
YBL051C	PIN4	-0.46273	-0.0623268	-1.49364		YBL052C	SAS3	-1.6418	-0.322849	-1.79295
YBL050W	SEC17	-0.432422	-0.0559869	-0.412155		YBL051C	PIN4	0.329709	0.137436	-0.527218
YBL049W	MOH1	-0.281484	0.0720561			YBL050W	SEC17	-0.51239	-0.39689	-0.127891
YBL047C	EDE1	-1.27739	-0.066945	0.973069		YBL048W		0.380692	1.53167	-1.89202
YBL046W		-0.109652	-0.79533	0.170272		YBL047C	EDE1	-1.37455	-1.63619	-1.34013
YBL045C	COR1	0.669452	0.392414	-0.172626		YBL046W		0.334265	0.304717	0.0867375
YBL043W	ECM13	1.13474	0.701486	0.818295		YBL045C	COR1	-0.0155779	-0.203383	-0.761747
YBL042C	FUI1	-0.445152	-0.19935	-0.192633		YBL043W	ECM13	0.217454	0.419474	0.235997
YBL041W	PRE7	0.131366	-0.0260839	0.346735		YBL042C	FUI1	0.339186	0.201131	0.259878
YBL040C	ERD2	0.0314886	-0.166733	-0.0388469		YBL041W	PRE7	0.129478	0.00764442	-0.00250897
YBL039C	URA7	-0.72989	2.51756			YBL040C	ERD2	-0.0349985	-0.00762026	-0.0516884
YBL037W	APL3	-0.988955	-0.296485	-1.00918		YBL039C	URA7	-9.20609	-1.77647	-0.220865
YBL036C		-0.558184	-0.300638	-0.304175		YBL037W	APL3	0.417015	0.609801	0.19219
YBL035C	POL12	0.366992	-0.445292	0.233461		YBL036C		0.241095	0.0408681	0.201624
YBL034C	STU1	0.29314	0.695498	0.376868		YBL035C	POL12	1.05063	0.23149	-1.06999
YBL033C	RIB1	0.0917068	0.375795	-0.422294		YBL034C	STU1	0.00522845	0.550646	0.411236
YBL032W		-0.276545	0.236893	-0.392358		YBL033C	RIB1	0.114514	0.113682	-0.0962439
YBL031W	SHE1	0.0420766	0.585209	-0.334054		YBL032W		0.12133	-0.44784	-0.173347
YBL030C	PET9	-0.276083	0.597061	-0.565567		YBL031W	SHE1	0.533204	0.891285	0.413368
YBL029W		0.0719722	0.666203	0.640832		YBL030C	PET9	-0.613883	0.109925	-0.532159
YBL028C		-1.00722	-0.444239	-0.776793		YBL029W		1.74763	1.17648	1.37228
YBL027W	RPL19B	-0.659344	-0.016351	-0.184377		YBL028C		-0.892066	-0.866468	-0.270418
YBL026W	LSM2	-0.366881	-0.266917	-0.198988		YBL027W	RPL19B	-0.786525	-0.655944	-0.0311999
YBL025W	RRN10	0.614721	-0.147888	-1.70551		YBL026W	LSM2	-1.51903	-0.672734	-0.0938805
YBL024W	NCL1	-0.850106	-0.460685	-1.21867		YBL025W	RRN10	0.428809	-0.815089	-0.0786387
YBL023C	MCM2	1.26671	0.547365	0.28235		YBL024W	NCL1	-0.295532	-0.557802	-0.356613
YBL022C	PIM1	0.846393	0.412568	1.44357		YBL023C	MCM2	-0.416914	-0.27035	-0.864882
YBL021C	HAP3	-0.136902	0.399398	-0.293601		YBL022C	PIM1	-0.0280987	0.0691502	-0.363564
YBL020W	RFT1	-0.285237	-0.236472	-0.453801		YBL021C	HAP3	-0.826357	0.0168508	-0.580507
YBL018C	POP8	-0.138314	-0.0689591	-1.17138		YBL020W	RFT1	-0.244587	-0.425467	0.0250001
YBL016W	FUS3	3.27683	1.27693	0.293251		YBL018C	POP8	-1.68194	-0.464054	-0.942732
YBL015W	ACH1	0.604951	0.739115	1.66969		YBL016W	FUS3	0.1772	-2.21506	-2.32018
YBL010C		1.07098	0.569787	0.268834		YBL015W	ACH1	0.260524	0.352839	0.122265
YBL008W	HIR1	-1.82068				YBL010C		0.0236426	0.066365	-0.43252
YBL007C	SLA1	-0.179342	0.220399	0.0596118		YBL007C	SLA1	0.694383	0.248875	1.07164
YBL002W	HTB2	0.541576	0.145847	-0.907859		YBL002W	HTB2	-0.57551	-0.523668	-0.419345
YBL001C	ECM15	0.0852799	-0.123143	0.402622		YBL001C	ECM15	-0.379688	-0.192491	-0.365673
YBR003W	COQ1	0.651143	0.182966	0.022913		YBR003W	COQ1	0.20286	0.345908	-0.475768
YBR004C		-0.0827802	0.113981	0.297338		YBR004C		-0.187508	0.386087	0.209124
YBR005W		-1.49001	1.24191	-2.0765		YBR005W			0.564949	-1.91954
YBR006W	UGA2	0.524578	0.289541	0.18673		YBR006W	UGA2	0.0411481	0.0465667	0.0458789
YBR008C	FLR1	-0.776777	1.04151	0.00978008		YBR008C	FLR1	-2.74986	-0.450291	-0.858145
YBR009C	HHF1	-0.17729	0.118456	-1.12361		YBR009C	HHF1	-0.409164	-0.424198	-0.470289
YBR010W	HHT1	-0.450224	0.155207	-1.31829		YBR010W	HHT1	0.191729	-0.449184	-0.407057
YBR011C	IPP1	0.414169	0.392658	0.125895		YBR011C	IPP1	0.255748	-0.165604	-0.0981143
YBR012C		-0.950044	-0.155879	-0.994008		YBR012C		-0.606188	-0.23213	0.369784
YBR013C		-1.37866	0.0585424	-1.54496		YBR013C		-7.50997	0.0775473	1.10266
YBR014C		-0.698422	-0.182499	0.438821		YBR014C		-2.0866	0.0698373	-0.564639
YBR015C	MNN2	-0.517818	0.0807349	-0.286259		YBR015C	MNN2	-0.768946	-0.731791	0.0508839
YBR016W		0.141057	0.0823451	-0.00318138		YBR016W		-0.203663	-0.596201	-0.69167
YBR021W	FUR4	-0.740452	0.0580845	-0.0801346		YBR018C	GAL7	1.4156	-0.538211	-1.04407
YBR022W		0.730203	0.276584	0.0765253		YBR020W	GAL1	-7.17564	0.146323
YBR023C	CHS3	-0.666063	-0.393049	-0.0378026		YBR021W	FUR4	-0.5787	0.0485605	-0.208205
YBR024W	SCO2	0.477405	0.230963	0.0230847		YBR022W		-0.423844	0.0727803	-0.562268
YBR025C		0.544635	0.206795	0.235014		YBR023C	CHS3	0.460989	0.332391	0.507633
YBR026C	ETR1	0.650162	0.36863	0.325239		YBR024W	SCO2	-0.507929	0.0258748	-0.411122
YBR028C		-1.58739	-0.243348	-1.12175		YBR025C		0.305161	-0.0321033	0.05066
YBR029C	CDS1	-0.770244	0.172824	-1.16101		YBR026C	ETR1	-0.555866	-0.445294	-1.21748
YBR030W		-0.494521	-0.607484	-0.60393		YBR027C		-0.0602592		0.960256
YBR031W	RPL4A	-0.269922	0.374142	-0.820628		YBR028C		-4.0002	0.635968	-1.46492
YBR032W		-0.0695254	-0.336014	-0.111519		YBR029C	CDS1	0.249238	0.0858361	-0.0145883
YBR033W	EDS1	1.44026	1.20218	0.558315		YBR030W		-0.0991336	-0.0653682	0.0152008
YBR034C	HMT1	-0.288921	-0.195017	-0.631497		YBR031W	RPL4A	0.710776	-0.145949	0.118207
YBR035C	PDX3	-0.266816	-0.258182	-0.302275		YBR032W		-0.363516	-0.18388	-0.585129
YBR036C	CSG2	-0.57206	-0.140903	-0.790544		YBR033W	EDS1	2.04134	-0.73471	0.601149
YBR037C	SCO1	0.868204	0.523637	0.422028		YBR034C	HMT1	0.522953	-0.316078	0.0917886
YBR039W	ATP3	0.201246	0.626536	-0.316785		YBR035C	PDX3	-0.201593	-0.117282	-0.305638
YBR041W	FAT1	0.11369	0.0409162	-0.306494		YBR036C	CSG2	0.111097	0.108425	0.082471
YBR042C		-0.414656	-0.410349	-1.87326		YBR037C	SCO1	0.31934	0.371169	-0.561681
YBR044C	TCM62	-0.0586003	0.0659943	0.156654		YBR039W	ATP3	0.0306852	-0.207632	-0.170207
YBR046C	ZTA1	-0.400388	0.0711992	-0.333316		YBR041W	FAT1	0.367879	0.328307	-0.0884292
YBR048W	RPS11B	0.0643413	-0.222287	0.12099		YBR042C		0.092481	-0.320531	-0.568782
YBR049C	REB1	0.197891	0.362084	-1.13873		YBR044C	TCM62	-0.623945	-0.218038	0.225905
YBR050C	REG2	0.637468	0.111078	0.309412		YBR046C	ZTA1	-0.539477	-0.467824	-0.335697
YBR052C		1.46692	0.454956	0.486274		YBR047W			-1.64694
YBR053C		1.02113	0.0946473	0.566008		YBR048W	RPS11B	0.122532	-0.19644	0.245208
YBR054W	YRO2	2.11842	1.96074	0.428591		YBR049C	REB1	0.497318	0.392728	0.491383
YBR055C	PRP6	-0.354025	-0.255936	-1.66145		YBR050C	REG2	-0.000942934	0.16152	0.491588
YBR056W		-0.0965672	0.0752761	0.262185		YBR052C		-0.426363	-0.555253	-0.651816
YBR057C	MUM2	0.156003	0.260827	0.34833		YBR053C		-1.20037	-0.602544	-1.19431
YBR058C-A	TSC3	-0.154857	-0.159739	-0.502794		YBR054W	YRO2	1.44889	-0.0613071	0.178471
YBR060C	ORC2	-0.0624915	-0.330049	0.332651		YBR055C	PRP6	0.258651	-0.380333	0.789542
YBR061C	TRM7	-0.221944	0.252097	0.233492		YBR056W		-0.803488	-0.0227865	-0.154259
YBR062C		-0.557729	-0.137423	-0.0160183		YBR057C	MUM2	0.129666	-0.2372	0.132816
YBR063C		0.0992548	0.0025302	0.37578		YBR058C-A	TSC3	-0.0306746	-0.625062	-0.344031
YBR065C	ECM2	0.163292	0.431258	-0.320309		YBR060C	ORC2	-0.223042	-0.0747892	0.183858
YBR066C	NRG2	0.237207	0.291275	0.131188		YBR061C	TRM7	-0.335333	-0.211069	0.47005
YBR067C	TIP1	-0.609786	-0.27495	0.154415		YBR062C		-0.749167	-0.0914755	-0.148167
YBR068C	BAP2	-0.523292	-0.542249	0.625293		YBR063C		-0.371293	0.239555	-0.431217
YBR070C	SAT2	-0.672655	-0.279986	-0.389255		YBR065C	ECM2	0.255297	0.0600685	-0.0355304
YBR071W		1.08523	1.36111	-0.723461		YBR066C	NRG2	0.412236	0.176441	-0.217722
YBR072W	HSP26	0.534616	0.321186	-0.133377		YBR067C	TIP1	0.146347	-0.0747953	-0.0298532
YBR074W		-0.0522715	-0.472351	-1.58062		YBR068C	BAP2	0.103418	0.330415	0.42364
YBR075W		-0.696837	-0.380312	-0.485374		YBR069C	TAT1	-2.62977
YBR076W	ECM8	-0.796583	-0.144954	0.510225		YBR070C	SAT2	-1.10065	-0.797663	-0.949086
YBR077C		1.23436	-0.146997	-1.04935		YBR071W		0.410163	1.02615	0.0395859
YBR078W	ECM33	-0.294243	-0.195559	0.506809		YBR072W	HSP26	-0.0223635	-0.384465	-0.631115
YBR079C	RPG1	-0.631914	-0.259477	-0.456162		YBR074W		2.02215	1.33745	0.991984
YBR080C	SEC18	-0.418883	-0.40111	-0.644204		YBR075W		0.266382	-0.439898	0.192796
YBR081C	SPT7	-1.24657	-0.0482146	-0.958521		YBR076W	ECM8	-0.411875	0.477416	0.576698
YBR082C	UBC4	-0.145463	-0.484362	0.441811		YBR077C		2.08444	1.83104	-4.4002
YBR083W	TEC1	-0.750803	-0.522704	-0.439145		YBR078W	ECM33	-0.0324424	0.00714385	0.239426
YBR084C-A	RPL19A	-0.29215	-0.505651	0.123189		YBR079C	RPG1	0.14901	-0.170899	0.217855
YBR084W	MIS1	0.160929	0.19212	0.360176		YBR080C	SEC18	-2.59437	-1.40594	-1.1954
YBR086C	IST2	-0.599702	-0.117813	-0.58238		YBR081C	SPT7	0.83464	1.49286	0.93605
YBR087W	RFC5	0.222805	0.248985	0.150484		YBR082C	UBC4	0.0443852	-0.0751279	0.40988
YBR089W		0.337232	0.230832	-1.60247		YBR083W	TEC1	0.260638	-0.739804	0.0777771
YBR090C	NHP6B	0.150812	-0.100194	0.314504		YBR084C-A	RPL19A	-0.0811313	-0.504014	0.224111
YBR091C	MRS5	-0.642079	-0.364333	0.165933		YBR084W	MIS1	0.40169	0.488654	0.436085
YBR092C	PHO3	-0.665376	-1.79188	-0.603772		YBR086C	IST2	0.0751371	-0.117405	0.00359152
YBR093C	PHO5	-0.787973	-0.64683	-0.496577		YBR087W	RFC5	0.363008	0.241115	0.110603
YBR094W		-0.587698	-0.314575	0.177986		YBR089W		-0.288657	0.00844826	-0.734989
YBR095C	RXT2	-0.0146961	-0.186074	0.639774		YBR090C	NHP6B	-0.0901699	0.0696126	-0.40674
YBR096W		-0.082892	-0.279183	-0.0106883		YBR091C	MRS5	-0.584788	-0.128786	0.0331685
YBR099C		-3.74234	0.995443	-2.10506		YBR092C	PHO3	-0.151648	-1.26142	-0.435825
YBR100W		-0.0488245	0.169011	-0.129476		YBR093C	PHO5	0.410833	-0.684892	0.315667
YBR101C	FES1	-0.0144859	-0.349775	0.66487		YBR094W			-1.16687	-0.154148
YBR102C	EXO84	2.48447	0.922607	-0.0775116		YBR095C	RXT2	0.0169728	0.0569626	0.31398
YBR103W	SIF2	-0.289338	-0.00748581	-1.31103		YBR096W		-1.32605	-0.092955	-0.384205
YBR104W	YMC2	0.22892	0.319047	0.0749173		YBR099C		-1.35023	-4.30899	-1.90295
YBR105C	VID24	0.50142	1.24221	-0.211287		YBR100W		-0.11854	1.07629	0.172822
YBR106W	PHO88	-1.02346	0.123977	-1.99687		YBR101C	FES1	-0.0260129	0.0786581	0.0336119
YBR107C	IML3	-0.0216111	0.246477	-0.195229		YBR102C	EXO84	2.47474
YBR109C	CMD1	-0.175671	0.130063	-0.720771		YBR103W	SIF2	0.230383	-0.209066	-0.273696
YBR110W	ALG1	-0.506682	0.0846131	-0.386935		YBR104W	YMC2	0.664004	0.0601853	0.418058
YBR111C	YSA1	0.692313	-0.0827653	0.933661		YBR105C	VID24	1.19234	0.664592	0.42152
YBR111W-A	SUS1	-0.323509	-0.207373	-0.0509596		YBR106W	PHO88	0.0487152	-0.256368	-0.208602
YBR112C	CYC8	-0.59279	-0.209549	-0.33067		YBR107C	IML3	0.592502	-0.0225593	0.488563
YBR114W	RAD16	0.145088	0.61529	-0.608873		YBR109C	CMD1	-0.192032	0.145081	-0.0478345
YBR115C	LYS2	-0.664534	-0.0264833	-0.284149		YBR110W	ALG1	-0.240048	0.0905608	-0.266744
YBR116C		-0.43849	-0.0478675	-0.104159		YBR111C	YSA1	-0.451631	-0.291838	-0.072386
YBR118W	TEF2	-0.218713	-0.527129	0.00641428		YBR111W-A	SUS1	-0.109875	-0.259384	-0.0579495
YBR119W	MUD1	-0.44407	0.261297	0.228654		YBR112C	CYC8	-0.127928	-0.117095	0.114161
YBR120C	CBP6	-0.120575	0.0876509	0.157142		YBR115C	LYS2	-0.0941612	-0.0571466	-0.25477
YBR121C	GRS1	-0.488671	-0.620567	-0.30258		YBR116C		-0.120594	-0.294533	-0.285892
YBR122C	MRPL36	0.934999	0.595191	0.193114		YBR117C	TKL2	0.3748	0.809466
YBR123C	TFC1	-0.197413	-0.697228	0.0429171		YBR118W	TEF2	-0.129154	-0.648779	-0.501995
YBR125C	PTC4	0.705789	0.385227	0.651614		YBR119W	MUD1	-0.515891	0.257772	-0.175506
YBR126C	TPS1	1.5825	0.851239	-0.237488		YBR120C	CBP6	-0.710091	0.161098	0.062538
YBR128C	APG14	1.57142	0.828727	0.171376		YBR121C	GRS1	-0.0971182	-0.290302	0.162268
YBR129C	OPY1	0.808901	0.915388	0.524583		YBR122C	MRPL36	-0.889483	0.0356585	-0.964727
YBR130C	SHE3	0.227964	-0.184211	-0.427622		YBR123C	TFC1	0.0905262	-0.18417	-0.373592
YBR131W	CCZ1					YBR124W		0.26964	2.08537
YBR132C	AGP2	-0.263495	-0.110797	0.611897		YBR125C	PTC4	0.502863	0.229646	0.427584
YBR133C	HSL7	0.696907	-2.23175	-0.937895		YBR126C	TPS1	-0.455343	-0.156444	-1.03433
YBR134W		0.125879	-0.0807605	0.379227		YBR127C	VMA2	0.623381	0.798433	1.35517
YBR135W	CKS1	0.118688	0.0711237	0.207755		YBR128C	APG14		3.24351	0.729049
YBR139W		0.0548475	0.0555056	0.139957		YBR129C	OPY1	-0.510387	-0.932947	-1.07199
YBR141C		0.572435	0.72732	0.183199		YBR130C	SHE3	0.1478	-0.257009	-0.378542
YBR142W	MAK5		0.55906			YBR132C	AGP2	0.447583	0.683468	-0.123466
YBR143C	SUP45	-0.658422	0.127135	-0.954466		YBR133C	HSL7	-0.176662	-1.22518	-0.741847
YBR144C		-0.18435	-0.345397	-0.33078		YBR134W		-0.0273841	-0.293721	-0.385565
YBR145W	ADH5	-0.118538	0.438535	-0.143296		YBR135W	CKS1	0.251835	-0.157446	0.3002
YBR146W	MRPS9	0.91289	-0.597682	0.457183		YBR139W		-0.0325917	0.174065	-0.475331
YBR147W		0.504492	0.210942	0.490901		YBR141C		0.072594	-0.0721369	-0.153624
YBR149W	ARA1	0.677047	0.614158	-0.768227		YBR142W	MAK5	2.53968	0.813364	0.985986
YBR150C	TBS1	-0.0663212	0.413212	0.728327		YBR143C	SUP45	0.00304344	-0.195523	0.0316539
YBR151W	APD1	-0.650739	-0.597485	-0.408795		YBR144C		-1.67826	-0.153173	-0.851163
YBR152W	SPP381	0.277475	1.15801	1.06256		YBR145W	ADH5	0.758691	0.804306	0.62698
YBR153W	RIB7	0.605853	0.506735	-0.216934		YBR146W	MRPS9	-0.454113	-0.0651102	-0.323238
YBR154C	RPB5	-0.119926	-0.288609	-0.290911		YBR147W		0.208409	0.809218	0.282595
YBR155W	CNS1	-0.0334159	-0.0788307	0.577758		YBR149W	ARA1	-0.259518	-0.0319359	-0.579997
YBR156C	SLI15	0.517596	0.0809268	0.412299		YBR150C	TBS1	0.503656	-0.0587648	0.0654184
YBR157C	ICS2	-0.70251	0.265987	-0.710031		YBR151W	APD1	-0.225119	-0.168847	-0.424448
YBR158W	AMN1	1.49649	0.170914	-0.126295		YBR152W	SPP381	0.992726	1.53027	0.908954
YBR159W		0.221734	0.418447	0.0821281		YBR153W	RIB7	0.29843	0.063682	-0.291797
YBR160W	CDC28	0.0200324	-0.248434	-0.503116		YBR154C	RPB5	-0.235581	-0.606162	-0.534448
YBR161W		0.907992	0.585689	0.458966		YBR155W	CNS1	0.183638	-0.0662665	0.527618
YBR162C	TOS1	0.289736	0.148128	-1.71891		YBR156C	SLI15	0.440775	0.162492	0.132089
YBR162W-A	YSY6	-0.258034	-0.335384	0.484831		YBR157C	ICS2	1.30716	0.114048	0.833025
YBR163W	DEM1	-1.1541	0.804294	1.6088		YBR158W	AMN1	-0.170058	-1.11084	-1.46104
YBR164C	ARL1	-0.0203299	-0.0188762	0.0997737		YBR159W		0.643225	0.308282	0.250526
YBR165W	UBS1	1.05983	0.470043	1.07605		YBR160W	CDC28	-0.0347949	-0.379215	-0.491942
YBR166C	TYR1	-0.149727	-0.113561	-0.475352		YBR161W		0.254021	0.235199	0.0900905
YBR167C	POP7	-0.363176	-0.226287	0.0443855		YBR162C	TOS1	0.586358	-0.56739	-0.933051
YBR169C	SSE2	0.983739	-0.0231326	-0.307393		YBR162W-A	YSY6	-0.332874	-0.0982541	0.108685
YBR170C	NPL4	0.801231	0.258022	0.335837		YBR163W	DEM1	0.654384	0.582234	1.97082
YBR171W	SEC66	0.0816333	1.29285	-1.46451		YBR164C	ARL1	-0.425444	-0.121067	-0.268172
YBR172C	SMY2	-1.02341	-0.67095	0.160775		YBR165W	UBS1	0.0663111	-0.356982	-0.462008
YBR173C	UMP1	-0.218444	0.0296701	-0.285451		YBR166C	TYR1	0.488443	-0.13109	-0.14557
YBR175W	SWD3	0.124207	-0.0764886	-0.0730981		YBR167C	POP7	-0.231681	-0.334469	-0.101957
YBR176W	ECM31	0.18473	-0.0395167	0.475548		YBR169C	SSE2	-0.130082	-0.5478	-1.21101
YBR177C	EHT1	-0.0744647	0.20375	-0.371795		YBR170C	NPL4	-0.30889	-0.272691	-0.0818458
YBR178W		0.054588	0.341787	-0.118359		YBR171W	SEC66	-1.86776	0.627869	-1.93235
YBR179C	FZO1	0.46772	-2.9212	0.267705		YBR172C	SMY2	-0.0105235	-0.0806658	0.760202
YBR180W	DRT1	-0.347051	-0.0449229	-0.511059		YBR173C	UMP1	-0.182497	-0.0167168	-0.0285303
YBR181C	RPS6B	-0.214204	-0.570485	0.0643423		YBR175W	SWD3	0.378662	0.285669	-0.163269
YBR182C	SMP1	-0.224196	0.197995	-0.319269		YBR176W	ECM31	0.195975	-0.206393	0.290662
YBR183W	YPC1	1.76298	2.13042	0.209439		YBR177C	EHT1	0.0528992	0.45747	0.0209487
YBR185C	MBA1	0.480076	0.762346	-0.607804		YBR178W		0.162371	0.295045	1.11378
YBR186W	PCH2	0.174288	0.84219	0.273177		YBR179C	FZO1		-1.42977	0.318125
YBR187W		-0.43317	-0.222632	-0.54412		YBR180W	DRT1	-0.207947	-0.266666	-0.144435
YBR188C	NTC20	-0.289085	-0.240173	-0.257737		YBR181C	RPS6B	-0.195389	-0.634176	-0.626407
YBR189W	RPS9B	0.0782006	0.115425	0.113746		YBR182C	SMP1	0.325406	-0.253878	0.289662
YBR190W		-0.251407	-0.264419	-0.402788		YBR183W	YPC1	-1.08827	0.632511	-0.770803
YBR191W	RPL21A	-0.412619	-0.372172	-0.460067		YBR185C	MBA1	-0.13969	0.877134	0.320385
YBR192W	RIM2	-0.951969	-0.770324	-1.516		YBR186W	PCH2	0.326974	0.274851	0.739237
YBR193C	MED8	0.090606	0.438863	0.274953		YBR187W		-0.120757	0.0101867	0.311224
YBR194W	SOY1	-0.760187	-0.169832	-0.681249		YBR188C	NTC20	-0.440667	-0.11207	0.0315104
YBR195C	MSI1	-0.15665	0.128338	-0.37498		YBR189W	RPS9B	0.50925	0.143438	0.413734
YBR196C	PGI1	-0.334395	-0.0557525	-0.301367		YBR190W		0.139246	-0.338641	0.0762115
YBR197C		0.388886	0.0206568	0.26913		YBR191W	RPL21A	-0.21123	-0.400166	0.123383
YBR200W	BEM1	0.604884	1.07897	0.410966		YBR192W	RIM2	-1.38932	-0.769262	-0.667119
YBR201W	DER1	-0.693585	-0.016304	-0.851118		YBR193C	MED8	0.446985	0.298605	0.205499
YBR203W	COS111	-0.611841	0.426687	-0.311719		YBR194W	SOY1	-0.193492	-0.067773	0.257353
YBR204C		1.58393	0.451692	0.279863		YBR195C	MSI1	0.0465482	-0.300247	-0.063792
YBR205W	KTR3	0.67683	0.242555	0.43597		YBR196C	PGI1	0.175942	0.0315185	0.1201
YBR207W	FTH1	1.0856	0.250026	0.0768051		YBR197C		0.129342	-0.0691795	-0.197287
YBR208C	DUR1,2	-1.17822	0.593307	-0.861356		YBR200W	BEM1	1.14609	0.596079	0.868532
YBR210W		-0.0178774	0.00717484	0.4934		YBR201W	DER1	0.0961628	-0.313468	0.47536
YBR211C	AME1	0.123169	0.0295743	0.433214		YBR203W	COS111	0.0664234	-0.364477	-2.11392
YBR212W	NGR1	-0.691764	-0.165181	-0.86929		YBR204C		0.908759	0.47409	-0.0141084
YBR213W	MET8	-0.290968	-0.595023	-0.971411		YBR205W	KTR3	0.391908	0.120972	-0.266575
YBR214W	SDS24	-0.00492608	0.20768	-0.687463		YBR207W	FTH1	-0.479054	0.0569547	-0.338256
YBR217W	APG12	1.20082	0.441981	-0.639179		YBR208C	DUR1,2	0.0185062	0.973059	-0.0646056
YBR219C		0.107185	0.0585697	0.420478		YBR210W		-0.314404	0.243765	-0.0144585
YBR220C		-0.239433	0.445396	-0.980377		YBR211C	AME1	-0.189094	0.241258	-0.0284077
YBR221C	PDB1	0.378236	0.492172	0.058236		YBR212W	NGR1	-0.27333	-0.851619	-0.668167
YBR227C	MCX1	0.0884383	1.5367	-2.40446		YBR213W	MET8	0.342016	0.229554	0.555963
YBR228W	SLX1	0.925341	3.57447	-1.28277		YBR214W	SDS24	0.104675	-0.370471	-0.351918
YBR231C	AOR1	0.5198	0.912029	1.38706		YBR217W	APG12	1.76918	1.76471	1.46029
YBR233W-A	DAD3	-0.0266686	0.155238	-0.578777		YBR219C		0.0637025	0.272058	0.315785
YBR234C	ARC40	-0.314535	-0.435009	-0.173643		YBR220C		-0.673987	0.36609	-0.633186
YBR235W		0.047299	0.0642972	-0.147879		YBR221C	PDB1	0.144588	0.254803	-0.460951
YBR236C	ABD1	-0.0920923	0.209288	0.055281		YBR227C	MCX1	-0.668286	-0.69387	-0.431442
YBR239C		-0.695504	-0.166465	-0.994922		YBR228W	SLX1	1.89143	1.09984	1.29216
YBR241C		0.414338	0.0910719	0.0729845		YBR231C	AOR1	2.39785	0.440343	-0.471138
YBR242W		0.204554	-0.0865225	0.68667		YBR233W-A	DAD3	-0.204026	-0.2273	-0.51167
YBR243C	ALG7	-0.0564522	0.249098	-0.127118		YBR234C	ARC40	-0.34544	-0.386243	-0.327966
YBR244W	GPX2	0.126279	0.30172	0.801657		YBR235W		0.0640664	0.244959	-0.414265
YBR245C	ISW1	-0.97446	-0.0517551	-0.84132		YBR236C	ABD1	0.504982	0.00902684	0.141466
YBR246W		0.892746	0.475097	-0.190149		YBR239C		-0.00638303	-0.0284877	0.276011
YBR247C	ENP1	-0.0547148	0.112856	0.365002		YBR241C		0.195147	0.352664	0.468186
YBR248C	HIS7	0.165314	-0.141	0.372166		YBR242W		0.0186728	0.101849	0.12797
YBR249C	ARO4	-0.101501	-0.251984	0.220492		YBR243C	ALG7	-0.0422722	-0.0285415	0.195874
YBR250W		0.141159	-0.220508	-0.133327		YBR244W	GPX2	-0.169209	-0.457689	0.618802
YBR251W	MRPS5	1.17126	0.482234	1.02968		YBR245C	ISW1	0.287182	-0.139795	-0.146686
YBR252W	DUT1	0.151559	0.0161703	-0.0213554		YBR246W		0.798014	0.341314	-0.211779
YBR253W	SRB6	0.547511	-0.00843957	0.263498		YBR247C	ENP1	0.352683	-0.0941753	0.228342
YBR254C	TRS20	0.198213	0.961553	-1.10087		YBR248C	HIS7	-0.341551	-0.196967	-0.381913
YBR255W		0.192772	-0.909191	-0.866641		YBR249C	ARO4	-0.222685	-0.13596	-0.0868086
YBR256C	RIB5	0.136531	-0.189311	0.658763		YBR250W		0.3617	0.0284864	-0.103078
YBR257W	POP4	-0.27995	-0.0735275	0.188528		YBR251W	MRPS5	-0.25501	-0.0107691	-0.17785
YBR258C	SHG1	0.0903131	-0.027821	-0.0699512		YBR252W	DUT1	-0.657602	-0.360323	-0.338164
YBR260C	RGD1	-0.508678	-0.763166	-2.08036		YBR253W	SRB6	-0.739624	-0.0435111	-0.554225
YBR261C		-0.194713	-0.203435	-0.0217585		YBR254C	TRS20	0.828082	0.658963	0.554912
YBR262C		0.0797296	0.136474	0.288336		YBR255W		-1.70193	-0.780092	-1.36433
YBR263W	SHM1	-1.07152	0.7333	-0.106964		YBR256C	RIB5	-0.301264	0.168193	0.0271525
YBR264C	YPT10	0.427965	0.0271312	0.146217		YBR257W	POP4	0.0869307	-0.0292624	0.115804
YBR265W	TSC10	0.863695	0.225518	0.380869		YBR258C	SHG1	-0.0294265	0.294886	-0.11709
YBR267W		0.140863	0.420519	0.328592		YBR260C	RGD1	-0.432365	-0.807607	-1.43541
YBR268W	MRPL37	0.389105	0.0672095	0.382909		YBR261C		0.325952	-0.322135	0.0878103
YBR269C		0.178091	0.863405	-2.40251		YBR262C		-1.23043	0.137553	0.194993
YBR271W		0.249768	0.423599	-0.72502		YBR263W	SHM1	-1.5494	2.26539	1.82375
YBR272C	HSM3		0.91342			YBR264C	YPT10	-0.21616	-0.0410518	0.144917
YBR273C		-0.229028	0.646067	-0.416522		YBR265W	TSC10	0.0836717	0.151484	-0.327762
YBR274W	CHK1	-0.00455303	-0.074987	-0.607131		YBR266C		1.12803	0.77043	0.302415
YBR278W	DPB3	0.149383	0.100072	0.285733		YBR267W		0.501425	0.225183	0.507998
YBR279W	PAF1	-0.629352	-0.359282	0.278548		YBR268W	MRPL37	-0.606256	0.132442	-0.110881
YBR280C		-0.433889				YBR269C		-0.340705	0.214204	-0.990435
YBR281C		-0.0123029	-1.26808	0.165271		YBR271W		0.766725	1.15016	0.353401
YBR282W	MRPL27	0.766415	0.133777	0.507238		YBR273C		0.66434	0.11125	0.0196347
YBR283C	SSH1	-0.0478367	0.0554063	0.338378		YBR274W	CHK1	-0.438978	0.0585888	-0.320916
YBR285W		-0.261192	-1.91609	0.507722		YBR277C		1.03353	1.23641	-2.58886
YBR286W	APE3	-0.697127	-0.27906	-0.281035		YBR278W	DPB3	-0.166525	0.19076	-0.0281254
YBR287W		-0.682212	0.389734	-0.445818		YBR279W	PAF1	-0.431588	-0.27856	0.246667
YBR288C	APM3	-0.722829	-0.268813	-0.635881		YBR281C		-1.22382	-0.379164	-2.26234
YBR289W	SNF5	-1.06053	-0.586059	-1.48335		YBR282W	MRPL27	-0.501475	0.157573	-0.85588
YBR290W	BSD2	0.696963	0.413753	0.565274		YBR283C	SSH1	0.149351	0.191638	0.185148
YBR291C	CTP1	-0.344141	0.143791	-0.611157		YBR285W			-4.18073	-0.136349
YBR293W		-0.664739	-0.136739	-0.504211		YBR286W	APE3	-0.401014	-0.0555005	0.115244
YBR295W	PCA1	-0.129462	0.410984	0.0680721		YBR287W		0.320443	0.656751	0.379937
YBR297W	MAL33	0.0664322	-0.502081	-0.505847		YBR288C	APM3	0.159054	-0.418403	-0.0180216
YBR298C	MAL31	-0.464886	0.0554588	0.799565		YBR289W	SNF5	0.204361	-1.42831	-0.0826965
YBR299W	MAL32	-1.93988				YBR290W	BSD2	-0.000982877	0.158785	0.227718
YBR300C		-0.205751	-0.206698	-0.213366		YBR291C	CTP1	-0.427388	0.220938	-0.162673
YBR301W	DAN3	-0.530249	-0.509505	-0.613573		YBR293W		0.353327	-0.408599	0.00290749
YCL075W		-0.60093	-0.229231	-0.98182		YBR295W	PCA1	0.378635	0.499423	0.30107
YCL073C		0.322192	0.220279	0.0292836		YBR297W	MAL33	-0.316393	0.140865	-0.482061
YCL069W		0.436968	0.270288	-0.347203		YBR298C	MAL31	0.178766	0.468362	0.572458
YCL067C	MHLALPHA2	0.300078	0.60483	0.481266		YBR300C		-0.772105	-0.0982491	-0.157465
YCL066W	HMLALPHA1	-0.827476	-0.32894	-0.765041		YBR301W	DAN3	-0.525051	-0.143875	0.0140612
YCL064C	CHA1	1.03958	1.09653	0.7656		YCL075W		-0.119113	0.111853	-0.121343
YCL061C	MRC1	-0.471153	-0.510446	0.130054		YCL073C		-0.356462	-0.0982276	-0.638675
YCL059C	KRR1	-0.69645	-0.319247	0.207987		YCL069W		0.915779	0.43047	-0.146207
YCL058C	FYV5	0.147633	-1.14246	0.61661		YCL067C	MHLALPHA2	0.586244	0.666177	-0.122634
YCL056C		-0.267023	-0.77088	0.0556784		YCL066W	HMLALPHA1	-0.235949	-0.244024	0.216609
YCL055W	KAR4	1.29325	0.547827	0.954271		YCL064C	CHA1	-1.38527	-1.45251	-2.47895
YCL052C	PBN1	0.201499	0.0179347	0.372449		YCL061C	MRC1	-0.184711	0.668142	-0.161687
YCL051W	LRE1	-1.25818	-3.44817			YCL059C	KRR1	-0.751456	-0.446956	-0.10259
YCL050C	APA1	-0.154258	-0.214942	-0.62697		YCL058C	FYV5	-0.342493	-0.0261949	0.30103
YCL048W		0.0983477	0.064437	-0.43413		YCL057W	PRD1			-2.37553
YCL047C		0.374455	0.118463	0.556858		YCL056C		-0.593897	-0.157026	-0.215954
YCL044C		0.202323	0.001382	0.157051		YCL055W	KAR4	1.06684	-0.0432963	0.0575656
YCL043C	PDI1	-0.605194	-0.106749	-0.721928		YCL052C	PBN1	0.191367	-0.309374	0.172204
YCL040W	GLK1	1.64796	0.451131	0.804668		YCL051W	LRE1	-3.37817	-1.26606
YCL038C	AUT4	-0.884907	0.644894	0.385451		YCL050C	APA1	-0.178236	-0.37053	-0.458455
YCL037C	SRO9	-0.0618226	-0.351692	-0.202523		YCL048W		0.331964	0.604312	0.041663
YCL036W	GFD2	0.798574	0.0851594	0.19923		YCL047C		-0.169726	-0.0385865	0.0887328
YCL035C	GRX1	-0.0437784	0.364003	-0.476974		YCL044C		0.452918	0.128049	0.0954735
YCL034W	LSB5	-0.393646	-1.40541	-6.48518		YCL043C	PDI1	0.411545	-0.198674	0.00387126
YCL033C		0.420089	-0.0259988	-0.366278		YCL040W	GLK1	-0.498687	-0.167234	-0.782003
YCL032W	STE50	0.266435	0.380345	0.550376		YCL038C	AUT4	0.501903	0.389514	0.70359
YCL031C	RRP7	-0.346309	-0.106621	-0.19572		YCL037C	SRO9	0.623618	0.218349	1.68928
YCL029C	BIK1	-0.128857	0.000665489	-0.198196		YCL036W	GFD2	0.18712	-0.109761	0.42977
YCL028W	RNQ1	-0.0496742	0.166891	-0.579703		YCL035C	GRX1	-1.2605	-0.0430596	-0.926589
YCL026C-B	HBN1	-1.57992	-0.251216	-0.403725		YCL034W	LSB5	-0.11593	-0.563178	-0.772747
YCL026C-A	FRM2	1.1465	0.827918	-0.00680859		YCL033C		-0.456692	0.389455	0.0564755
YCL024W	KCC4	-1.04717				YCL032W	STE50	0.633597	0.716917	0.719726
YCL023C		1.35148	-0.896945	-0.30776		YCL031C	RRP7	-0.345701	-0.362773	-0.156287
YCL022C		0.706785	0.0406414	0.397815		YCL029C	BIK1	0.144232	0.051777	-0.0433482
YCL021W-A		-0.374884	-0.0525938	0.353389		YCL028W	RNQ1	0.373186	0.292242	0.375877
YCL020W		-0.134976	-0.000274918	0.43039		YCL027W	FUS1	-0.0751567	-3.55943
YCL018W	LEU2	0.24658	0.0239646	0.166765		YCL026C-B	HBN1	0.159114	-0.429168	0.364449
YCL017C	NFS1	-0.0709335	0.492951	0.583367		YCL026C-A	FRM2	-0.901173	-0.413535	-1.33899
YCL016C	DCC1	0.72609	-0.051104	0.640519		YCL024W	KCC4
YCL014W	BUD3	-1.08576	0.331659	0.203458		YCL022C		-0.625166	-0.190929	-0.250405
YCL012C		-0.146384	0.0505286	-0.407721		YCL021W-A		-0.250472	0.33653	0.271133
YCL011C	GBP2	0.139424	0.170354	-0.148264		YCL020W		-0.0771156	0.0899189	0.441328
YCL009C	ILV6	-0.0711471	0.0401172	-0.253239		YCL018W	LEU2	0.449679	0.308293	0.395423
YCL008C	STP22	1.29231	1.09535			YCL017C	NFS1	0.575852	1.17682	0.833387
YCL007C	CWH36	-0.0582815	-0.300592	-0.269772		YCL016C	DCC1	0.00680813	-0.113867	-0.242999
YCL005W-A	VMA9	-0.120937	0.0585947	-0.501704		YCL014W	BUD3	0.509777	-0.289032	-0.157218
YCL005W		0.0694303	-0.121139	-0.0194447		YCL012C		0.325381	-0.0642951	-0.00534965
YCL003W		0.927794	0.792409	-0.0578855		YCL011C	GBP2	0.43212	0.213593	-0.227409
YCL001W-A		0.892615	0.118388	0.201786		YCL010C	SGF29	-1.23212	0.458163	-0.179333
YCL001W	RER1	0.152967	0.200801	0.581387		YCL009C	ILV6	-0.0822736	-0.0474313	-0.572731
YCR002C	CDC10	-0.232629	-0.28201	0.306464		YCL008C	STP22	1.17277	0.637068	-3.74103
YCR003W	MRPL32	0.640899	0.138477	0.474183		YCL007C	CWH36	-0.144856	-0.274014	0.241213
YCR004C	YCP4	0.155183	-0.230351	0.144219		YCL005W-A	VMA9	-0.0297276	-0.328551	-0.150473
YCR005C	CIT2	0.619783	0.973169	0.199487		YCL005W		0.163881	0.00873696	0.27946
YCR007C		0.516032	0.565208	1.36136		YCL003W		-0.454652	-0.291253	-1.26755
YCR008W	SAT4	-0.233702	0.0896661	-0.547468		YCL001W-A		-1.17847	-1.96727	-0.763915
YCR009C	RVS161	0.675099	0.286016	0.632916		YCL001W	RER1	-0.0897649	-0.0587111	0.252183
YCR010C	ADY2	1.94943	0.876087	0.794221		YCR002C	CDC10	0.0276329	-0.0180419	0.0136694
YCR011C	ADP1	0.658403	0.272892	0.252877		YCR003W	MRPL32	-0.935592	0.108175	-0.361399
YCR012W	PGK1	-0.992672	0.00614466	-1.37173		YCR004C	YCP4	-0.49555	0.0838498	-0.124745
YCR013C		-1.59853	0.0540389	-1.90362		YCR005C	CIT2	-0.0583832	0.26725	0.0635717
YCR014C	POL4	-1.63023	-0.891286			YCR006C			4.50294	0.481355
YCR015C		-0.182429	-0.281163	-0.617276		YCR007C		-0.858711	0.0243759	-0.166103
YCR016W		0.0659599	0.0362123	0.414035		YCR008W	SAT4	-0.244032	-0.427436	-0.22287
YCR019W	MAK32	0.000881687	-0.23357	0.603763		YCR009C	RVS161	0.111533	0.221963	0.0975926
YCR020C	PET18	-0.0767452	0.266219	-0.108945		YCR010C	ADY2	1.38653	1.09083	0.280694
YCR020C-A	MAK31	1.11034	0.303721	0.556328		YCR011C	ADP1	0.548354	0.153952	0.0997119
YCR021C	HSP30	-0.0308381	2.10465	-1.89614		YCR012W	PGK1	0.0605851	-0.409387	-0.038478
YCR022C		0.0452826	-0.127823	-0.561152		YCR013C		-0.490122	-0.479683	0.098024
YCR023C		0.210865	0.622373	0.477752		YCR014C	POL4	0.523882	1.00896	1.27517
YCR024C		-0.4474	-0.128086	-0.611633		YCR015C		-0.59823	0.387808	0.928062
YCR024C-A	PMP1	-0.712804	0.27909			YCR016W		0.382046	0.292361	0.520966
YCR025C		1.38716	0.955279	-4.10321		YCR019W	MAK32	-0.14836	-0.116806	0.374204
YCR028C	FEN2	0.00182963	0.91942	0.90724		YCR020C	PET18	-0.910467	0.5388	0.484434
YCR028C-A	RIM1	0.484612	-0.38	0.185641		YCR020C-A	MAK31	0.0651167	-0.0719108	0.119442
YCR030C	SYP1	0.189711	0.212456	0.125598		YCR021C	HSP30	-0.274099	0.983289	1.673
YCR031C	RPS14A	-0.383891	-0.411931	-0.182853		YCR022C		0.924132	2.5824	-0.17086
YCR033W	SNT1	-0.554489	-0.101473	-0.958896		YCR023C		-0.105037	-0.307304	-0.0704391
YCR034W	FEN1	0.273835	0.544031	0.0933696		YCR024C		0.356181	-0.0216744	0.110557
YCR036W	RBK1	-0.582024	-0.296404	-0.351378		YCR024C-A	PMP1	0.67839	-0.453357	-1.09572
YCR038C	BUD5	-0.221795	-0.70181	-0.277677		YCR025C		0.779456	1.54543	0.864231
YCR039C	MATALPHA2	0.398541	-0.276589	0.143292		YCR028C	FEN2	0.0970481	0.575199	0.5969
YCR040W	MATALPHA1	-0.431921	0.401347	0.128465		YCR028C-A	RIM1	0.00263895	0.727398	0.191753
YCR041W		-0.265437	-0.315715	0.686207		YCR030C	SYP1	-0.0651756	-0.183831	-0.206284
YCR042C	TSM1	0.148625	0.198346	0.13805		YCR031C	RPS14A	0.440722	-0.433683	0.349298
YCR043C		-0.865553	-0.125447	-1.25675		YCR033W	SNT1	-1.05922	-0.785194	-0.0156525
YCR044C	PER1	-0.505069	0.401351	-0.570218		YCR034W	FEN1	-0.0401496	-0.0301115	-0.382124
YCR045C		0.0181053	0.333801	-0.380743		YCR036W	RBK1	0.00406897	-0.863953	-0.186534
YCR046C	IMG1	0.276227	-0.296302	-0.0759369		YCR038C	BUD5	0.661641	-0.209532	-0.0719482
YCR047C	BUD23	-0.467709	0.115343	0.251442		YCR039C	MATALPHA2	-1.08953	-0.083635	-0.269284
YCR048W	ARE1	-0.176807	0.0830296	0.227664		YCR040W	MATALPHA1		1.55504	-2.45122
YCR052W	RSC6	0.0265626	-0.0604121	-0.648864		YCR041W		0.00643758	0.400939	1.43283
YCR054C	CTR86	-0.31765	-0.0755164	-0.0611958		YCR042C	TSM1	-0.278297	-0.0360578	-0.0128325
YCR057C	PWP2	-0.13322	-0.111183	0.489192		YCR043C		-0.234954	0.454578	0.371278
YCR059C	YIH1	-0.375549	-0.095929	-0.883955		YCR044C	PER1	0.515657	0.682297	0.063979
YCR060W		-0.565755	0.172111	-0.333176		YCR045C		0.187311	0.402799	0.196742
YCR065W	HCM1	-0.115306	0.584216	0.30831		YCR046C	IMG1	-0.554738	-0.233177	-0.508202
YCR066W	RAD18	0.666715	0.20973	0.835187		YCR047C	BUD23	0.45644	0.243825	0.430435
YCR067C	SED4	-0.289741	-0.194812	0.411021		YCR048W	ARE1	0.0252348	0.191729	-0.19528
YCR068W	CVT17	-0.365713	-0.037004	-1.1346		YCR052W	RSC6	0.134611	0.525328	-0.259783
YCR069W	CPR4	-0.259081	-0.15019	-0.564134		YCR054C	CTR86	-0.0313222	0.0555891	0.478476
YCR071C	IMG2	0.263462	-0.0565394	0.721965		YCR057C	PWP2	0.345406	0.481639	0.680729
YCR072C	RSA4	0.118485	0.318149	-0.0135231		YCR059C	YIH1	0.225585	-0.00976124	-0.146799
YCR073W-A	SOL2	-0.166135	-0.200318	-0.22079		YCR060W		0.361493	0.305972	-0.114328
YCR075C	ERS1	0.126674	0.542361	-0.264531		YCR065W	HCM1	-0.00721254	0.07137	-0.256024
YCR079W		-0.0322738	-0.203856	-0.641729		YCR066W	RAD18	-0.539581	-0.19094	-0.0973532
YCR081W	SRB8	0.34914	0.674066	0.534322		YCR067C	SED4	-0.0580405	0.0691627	-0.0873452
YCR082W		0.681869	-0.325972	0.454272		YCR068W	CVT17	0.3279	0.136964	0.38884
YCR083W	TRX3	0.454493	1.4589	1.45801		YCR069W	CPR4	-0.102289	0.272497	-0.463069
YCR084C	TUP1	-0.167453	0.0933152	-0.285707		YCR071C	IMG2	-0.375676	0.17868	0.00428579
YCR086W	CSM1	1.24784	0.277685	-0.02475		YCR072C	RSA4	1.03413	0.371821	0.873828
YCR087W		-0.10647	-0.286196	0.153091		YCR073W-A	SOL2	-0.713456	-0.197375	-0.587324
YCR088W	ABP1	0.567218	0.418351	0.0101494		YCR075C	ERS1	0.558411	0.191535	0.109909
YCR090C		-0.0154588	-0.142195	-0.0580154		YCR079W		-0.371983	-0.369998	-0.976347
YCR094W	CDC50	0.905755	0.416781	-0.222007		YCR081W	SRB8	0.677709	0.531828	0.316717
YCR096C	HMRA2	0.318724	-0.110114	0.63344		YCR082W		-0.091163	-0.662806	-0.453592
YCR099C			-0.0826235			YCR083W	TRX3	-2.28501	0.0600257	0.0485642
YCR102C		0.237772	0.653412	0.334866		YCR084C	TUP1	0.40579	0.573929	0.2553
YCR102W-A		-2.00738	-2.20011	-1.43552		YCR086W	CSM1	0.716139	0.101942	-0.113275
YCR104W	PAU3	-0.220235	-0.239244	-0.191696		YCR087W		0.0746708	-0.185095	0.151867
YCR105W	ADH7	0.312302	0.391381	0.445953		YCR088W	ABP1	0.410444	0.289486	-0.524835
YCR106W	RDS1	-2.32033	0.230411	-3.16568		YCR090C		-0.330506	-0.0411607	-0.257417
YCR107W	AAD3	0.344077	0.540033	0.440117		YCR094W	CDC50	0.866294	0.886681	0.100854
YDL247W	MPH2	-0.354679	0.325889	1.14735		YCR096C	HMRA2	-0.29886	0.0733001	-0.100922
YDL246C	SOR2	-0.733341	0.235217	-0.0953794		YCR097W-A		0.53612		-0.815731
YDL245C	HXT15	0.330008	0.0935009	0.527596		YCR099C		6.04343	6.37038	5.36958
YDL243C	AAD4	-1.01268	0.164031	-0.286981		YCR102C		0.668313	0.793126	0.717538
YDL241W		-0.787135	-0.0488628	0.292708		YCR102W-A			-2.84976	-2.09097
YDL240W	LRG1	-0.0989208	-0.530081	0.733626		YCR104W	PAU3	-0.233147	-0.0433927	-0.137552
YDL239C	ADY3	2.05325	2.1363	1.51582		YCR105W	ADH7	0.049317	0.282833	-0.295857
YDL238C		-1.27375	0.638582	0.429699		YCR106W	RDS1	0.561979	1.68855	2.19377
YDL237W		0.325952	-0.827977	0.221389		YCR107W	AAD3	0.438633	0.394638	0.0201071
YDL236W	PHO13	-0.0657621	0.00769414	0.10991		YDL247W	MPH2	1.98309	1.34925	1.00241
YDL235C	YPD1	-0.399054	-1.04916	0.168473		YDL246C	SOR2	-0.0932784	-0.268388	0.0640526
YDL232W	OST4	0.291249	0.0730088	-0.178704		YDL245C	HXT15	0.384668	0.369108	0.132669
YDL231C	BRE4	0.0190951	0.239486	0.327813		YDL243C	AAD4	-0.51332	-0.342033	0.0427023
YDL230W	PTP1	-0.287403	-0.0606286	-0.0622015		YDL241W		0.395801	-0.0377723	-0.293498
YDL227C	HO	1.43014	0.251505	-0.43819		YDL240W	LRG1	0.203517	0.282169	0.326328
YDL226C	GCS1	-0.0117255	0.0609641	-0.30824		YDL239C	ADY3	-1.7714	0.867144	-1.10305
YDL225W	SHS1	-0.497236	-0.24306	-0.215126		YDL238C		-1.80265	-0.160898	-0.493027
YDL223C	HBT1	0.506338	0.879017	1.34604		YDL237W		-0.336133	-0.449288	-0.857812
YDL219W	DTD1	-0.376209	-0.378917	-0.0579819		YDL236W	PHO13	0.32235	-0.0824605	0.261585
YDL218W		-0.27175	-0.112128	0.088662		YDL235C	YPD1	-0.120144	-0.15658	0.137422
YDL217C	TIM22	0.287203	0.208662	0.424918		YDL232W	OST4	-0.44772	-0.642063	-0.436738
YDL216C	RRI1	0.545354	-2.26615	0.829878		YDL231C	BRE4	0.176001	0.490471	0.337364
YDL215C	GDH2	0.806879		-0.663826		YDL230W	PTP1	-0.183664	-0.423868	0.0675094
YDL214C	PRR2	0.215785	0.00556006	0.0621447		YDL227C	HO	-0.0305272	-1.09008	-1.09567
YDL212W	SHR3	-0.170307	-0.210533	0.227518		YDL226C	GCS1	-0.238787	-0.505746	-0.275677
YDL211C		-0.369843	0.0394424	0.414872		YDL225W	SHS1	0.142503	-0.206038	-0.0204439
YDL210W	UGA4	-0.206896	-0.0467089	0.520543		YDL223C	HBT1	0.909931	1.40867	0.976626
YDL209C	CWC2	-0.444214	0.132836	-0.330532		YDL219W	DTD1	-0.293221	-0.266899	-0.247091
YDL208W	NHP2	-0.625923	-0.619076	-0.39589		YDL218W		0.350914	-0.170157	0.0796405
YDL207W	GLE1	-1.33957	-0.24149	-0.09206		YDL217C	TIM22	0.0405633	-0.170344	-0.109528
YDL206W		0.099325	1.22741	1.21067		YDL216C	RRI1	-0.0684696	-0.107208	1.34257
YDL205C	HEM3	-0.268516	-0.198987	0.175912		YDL215C	GDH2	0.749441	-0.492023	-1.09339
YDL204W	RTN2	-0.342528	-0.759479	-0.163979		YDL214C	PRR2	-0.0789129	-0.513475	-0.122505
YDL203C		-0.159841	-1.28173	0.722633		YDL212W	SHR3	-0.452949	0.0579826	-0.0280327
YDL202W	MRPL11	0.446702	0.058266	0.327648		YDL211C		-0.26963	-0.135924	0.421769
YDL199C		-0.68783	0.650529	0.466717		YDL210W	UGA4	0.172459	0.452707	0.051627
YDL197C	ASF2	0.0767478	0.311005	0.534062		YDL209C	CWC2	-0.208007	-0.426058	-0.247628
YDL195W	SEC31	-0.115135	0.0787853	-1.48987		YDL208W	NHP2	0.0187765	-0.444845	0.444624
YDL194W	SNF3	-0.473391	-0.0198932	0.662387		YDL207W	GLE1	-0.881525	-0.238895	0.166435
YDL193W		-0.0827632	0.131707	0.0457619		YDL206W		1.59266	1.65046	1.30073
YDL192W	ARF1	-0.193406	-0.170397	-0.0637637		YDL205C	HEM3	0.0148749	-0.130046	-0.0442937
YDL191W	RPL35A	-0.213454	-0.563959	0.0641249		YDL204W	RTN2	-0.317862	-0.681981	-0.496324
YDL190C	UFD2	-0.124152	-0.111601	0.834274		YDL203C		0.849477	0.4558	0.0783915
YDL189W	RBS1	-0.996864	0.0188525	-0.605517		YDL202W	MRPL11	-0.362204	-0.00118228	0.23589
YDL188C	PPH22	0.262173	0.652061	0.622552		YDL199C		0.0667243	0.765433	0.278149
YDL186W		-0.819443	-0.778251	0.517176		YDL197C	ASF2	-0.223863	-0.0342208	0.312139
YDL185W	VMA1	-0.0239437	-0.389043	0.859585		YDL195W	SEC31	-0.672377	0.234576	-1.43462
YDL184	RPL47A	-1.35829	-0.684594	-0.96024		YDL194W	SNF3	0.328235	0.714354	0.5076
YDL182W	LYS20	-0.345999	-1.10014	0.141342		YDL193W		0.29117	-0.0111057	0.179586
YDL181W	INH1	-1.66214	0.0279782	-1.8978		YDL192W	ARF1	0.225974	-0.159128	0.286628
YDL179W	PCL9	1.10397	0.682091	0.142214		YDL191W	RPL35A	-0.670471	-0.590642	-0.270612
YDL178W	DLD2	-0.86315	0.122909	-0.563974		YDL190C	UFD2	0.22503	0.599709	0.537006
YDL177C		0.0163715	-0.172509	0.172248		YDL189W	RBS1	-0.37912	-0.271647	-1.03103
YDL176W		-1.0287	0.280109	-2.30214		YDL188C	PPH22	0.191917	0.221984	0.416092
YDL175C	AIR2	-0.980225	0.0825109	-0.379673		YDL186W		-0.524073	0.354014	0.114829
YDL174C	DLD1	0.649556	-0.481685	0.582068		YDL185W	VMA1	-0.113019	0.126185	0.372969
YDL173W		0.0719832	-0.12669	0.026446		YDL184	RPL47A	-0.396931	-1.3357	-0.657667
YDL172C		0.152181	0.0143998	0.209133		YDL182W	LYS20	-0.13498	-0.423637	-0.117923
YDL169C	UGX2	0.406857	0.403211	-0.146079		YDL181W	INH1	-0.575343	-0.481073	-0.195518
YDL168W	SFA1	-0.218982	0.30149	-0.113674		YDL179W	PCL9	0.0194954	0.0661634	-0.575916
YDL167C	NRP1	-1.59619	-0.0143266	-1.42103		YDL178W	DLD2	-0.150605	-0.536354	-0.349012
YDL166C	FAP7	0.0619843	-0.0750601	-0.109058		YDL177C		0.167222	-0.213907	0.242079
YDL165W	CDC36	2.35126	-0.093313	-5.77655		YDL176W		0.287179	-0.357007	-1.70206
YDL162C		0.415878	0.914009	-1.01505		YDL175C	AIR2	-0.234363	-0.358542	-0.377438
YDL161W	ENT1	-0.0931534	-1.61143	0.499587		YDL174C	DLD1	0.00668848	0.0896079	-0.115502
YDL158C		-0.127382	-0.777293	0.144681		YDL173W		-0.316613	-0.0485951	-0.370533
YDL157C		0.240611	0.274044	-1.29704		YDL172C		0.273946	-0.0734081	0.281743
YDL156W		-0.615715	-0.0931051	-0.398015		YDL169C	UGX2	0.151446	-0.0274897	-0.257783
YDL155W	CLB3	-0.659499	-0.169379	-0.44499		YDL168W	SFA1	-0.283039	-0.242656	0.0665655
YDL154W	MSH5	0.0172615	0.22511	0.593965		YDL167C	NRP1	0.936833	0.40579	0.178606
YDL153C	SAS10	-1.1348	-1.04793	-0.311142		YDL166C	FAP7	0.126702	-0.434252	-0.494888
YDL151C	BUD30	-0.52947	0.224282	-0.121424		YDL165W	CDC36	-0.343726	-0.593314	-2.1727
YDL149W	APG9	0.63251	0.384882	1.3321		YDL162C		1.7863	0.85421
YDL148C	NOP14	-0.182506	0.282115	0.857337		YDL161W	ENT1	-0.0257962	-0.412443	-0.184018
YDL147W	RPN5	-0.239555	-0.0436977	0.569898		YDL158C		-0.18004	-0.507054	0.213199
YDL146W		-0.146598	0.357671	0.000699551		YDL157C		-0.0400321	-0.0199157	-0.631574
YDL145C	COP1	-0.890188	0.0188114	-0.591791		YDL156W		0.13772	0.00711386	0.390975
YDL144C		-0.498596	0.155364	-0.244356		YDL155W	CLB3	-0.195689	-0.286459	-0.14522
YDL143W	CCT4	-0.197397	-0.00653359	-0.0336964		YDL154W	MSH5	-0.166978	0.19525	0.268921
YDL142C	CRD1	0.45398	-0.264895	0.56948		YDL153C	SAS10	0.0531806	-0.513558	0.193217
YDL140C	RPO21	-0.25171	-0.362302	0.025345		YDL151C	BUD30	1.65451	0.375597	0.548993
YDL139C	SCM3	0.650361	0.726074	0.197557		YDL149W	APG9	-0.0979865	-0.00980841	0.143846
YDL138W	RGT2	-0.257146	-0.23856	-0.157161		YDL148C	NOP14	0.538403	0.374816	0.794163
YDL137W	ARF2	0.454697	-0.00203646	-0.392896		YDL147W	RPN5	-0.0702982	0.0719114	0.451915
YDL136W	RPL35B	-0.219111	-0.544841	0.0662091		YDL146W		0.199821	0.24956	0.182503
YDL135C	RDI1	0.206835	0.362734	0.0957624		YDL145C	COP1	0.307057	-0.100324	0.250797
YDL134C	PPH21	0.0325465	0.292789	0.358357		YDL144C		-0.441946	-0.3585	-0.213208
YDL132W	CDC53	2.21645	1.76441	1.73016		YDL143W	CCT4	0.361678	0.116941	0.112751
YDL130W-A	STF1	0.269058	0.100756	-0.154012		YDL142C	CRD1	0.401077	0.0957033	0.357094
YDL130W	RPP1B	-0.376689	0.0701685	-0.199508		YDL140C	RPO21	-0.49258	-0.355548	-0.0434686
YDL129W		0.13164	0.126119	0.0672137		YDL139C	SCM3	-1.01158	-0.214391	0.374773
YDL128W	VCX1	-0.0474407	0.171594	0.418716		YDL138W	RGT2	-0.0689941	-0.218316	-0.115568
YDL127W	PCL2	1.12567	0.630643	0.694968		YDL137W	ARF2	-0.205285	-0.242055	-0.262336
YDL126C	CDC48	0.0729928	-0.111632	0.946657		YDL136W	RPL35B	-0.196805	-0.605167	-0.079404
YDL125C	HNT1	-0.0368287	0.0659252	-0.047218		YDL135C	RDI1	0.305039	-0.0907299	-0.221178
YDL124W		0.234719	0.658107	-0.0337457		YDL134C	PPH21	-0.0999224	-0.0543958	0.373828
YDL121C		-0.855757	-0.676674	0.0200652		YDL132W	CDC53	-0.788281	-0.358488	-0.314452
YDL120W	YFH1	0.546794	0.137296	0.378445		YDL130W-A	STF1	0.127755	-0.160967	-0.385327
YDL119C		-0.0181243	-0.0437469	0.282072		YDL130W	RPP1B	0.352486	-0.072336	-0.189714
YDL117W	CYK3	0.0101834	-0.0902959	0.680782		YDL129W		0.297703	-0.0568896	0.272628
YDL115C	IWR1	-0.619324	-0.563798	0.146643		YDL128W	VCX1	-0.342266	0.0478459	0.269451
YDL114W		-0.148665	0.0482101	0.00822537		YDL127W	PCL2	0.304851	-0.0996273	-0.595472
YDL113C	CVT20	1.0306	0.373887	0.144831		YDL126C	CDC48	0.674416	0.49876	0.1744
YDL112W	TRM3	1.72483	0.186539	0.550268		YDL125C	HNT1	0.361572	-0.217812	-0.011426
YDL111C	RPR42	-0.029752	-0.0445066	0.150641		YDL124W		0.00435861	-0.273936	0.0114758
YDL110C		0.804299	-0.517202	0.438867		YDL121C		-0.186139	-0.268289	0.141516
YDL109C		-0.221517	-0.274312	0.184365		YDL120W	YFH1	-0.30668	-0.0236429	-0.0423661
YDL108W	KIN28	-0.536459	-0.0756981	-0.326949		YDL119C		0.147068	0.173513	0.147257
YDL107W	MSS2	-0.613347	0.188084	-0.102424		YDL118W		2.03632	2.22256	-1.72177
YDL106C	PHO2	-0.402124	-0.172696	0.485707		YDL117W	CYK3	0.333777	0.422269	-0.192119
YDL105W	QRI2	-0.36423	0.00460345	-0.239699		YDL115C	IWR1	-0.228283	-0.145689	-0.0699718
YDL104C	QRI7	-0.300738	0.0645568	0.180405		YDL114W		0.235778	-0.140781	0.297569
YDL102W	CDC2	-0.220653	-0.0491605	0.426205		YDL113C	CVT20	-0.124714	0.607119	0.136059
YDL101C	DUN1	0.00830072	-0.0214999	-0.219127		YDL112W	TRM3	5.14943	1.79642	2.82466
YDL100C		-0.434981	0.069202	-0.364308		YDL111C	RPR42	0.00825352	0.0452611	0.181342
YDL099W		-0.188194	0.162014	0.224952		YDL110C		0.0126252	-0.283964	-0.610639
YDL098C	SNU23	0.300381	0.0645899	0.306055		YDL109C		0.30654	0.474218	0.0782499
YDL097C	RPN6	0.160524	0.391153	0.304351		YDL108W	KIN28	-0.056667	-0.350876	-0.189594
YDL095W	PMT1	-0.504824	-0.466623	0.549868		YDL107W	MSS2	-0.0891401	-0.313265	0.145861
YDL092W	SRP14	-0.79507	-0.920761	-0.239973		YDL106C	PHO2	0.556355	0.936803	0.694494
YDL091C		0.146547	-0.239133	-0.0990619		YDL105W	QRI2	-0.167415	-0.300624	0.0929188
YDL088C	ASM4	-0.330062	-0.0832787	-0.36204		YDL104C	QRI7	-0.0728363	0.0261914	0.238623
YDL087C	LUC7	-1.6902	-1.01909			YDL102W	CDC2	-0.320496	0.136254	-0.0495008
YDL086W		0.736386	-0.151213	0.5333		YDL101C	DUN1	0.10451	0.282942	-0.328134
YDL085W	NDE2	0.127701	0.101511	0.42558		YDL100C		-0.120873	-0.267631	0.0393108
YDL084W	SUB2	-0.32983	0.410554	0.271		YDL099W		0.0103246	-0.170693	0.320015
YDL083C	RPS16B	0.00613382	-0.330011	-0.29443		YDL098C	SNU23	0.159787	-0.242615	-0.105711
YDL082W	RPL13A	-0.257797	-0.310465	0.277117		YDL097C	RPN6	-0.19532	-0.0205249	0.22701
YDL081C	RPP1A	-0.456485	-0.500026	-0.40427		YDL095W	PMT1	0.28646	0.457422	0.503482
YDL080C	THI3	0.160851	0.302331	-0.169191		YDL093W	PMT5		1.33308	-0.298348
YDL079C	MRK1	-0.392868	0.080153	0.33227		YDL092W	SRP14	-0.478335	-0.429978	0.241148
YDL078C	MDH3	0.19828	0.506954	0.290514		YDL091C		0.0938582	0.260618	0.148956
YDL076C	RXT3	0.275756	0.0713573	0.145698		YDL088C	ASM4	0.021573	0.0997126	-0.185327
YDL075W	RPL31A	-0.21487	0.0352165	-0.297058		YDL087C	LUC7		2.90627
YDL074C	BRE1	-1.96302	-1.74013	-2.3273		YDL086W		-0.0317013	-0.295464	0.000371322
YDL073W		-0.177576	0.639045	0.841133		YDL085W	NDE2	0.0760178	0.191111	0.0640658
YDL072C		-0.277555	0.00658745	-0.291727		YDL085C-A		0.364841	-2.45428	0.940421
YDL071C		-0.0646597	0.513593	0.653575		YDL084W	SUB2	-0.034141	0.0992615	0.605433
YDL070W	BDF2	-0.122268	-0.245174	0.321363		YDL083C	RPS16B	-0.532729	-0.46211	0.0499687
YDL069C	CBS1	-0.297893	0.0896523	-0.199407		YDL082W	RPL13A	0.256734	-0.326361	0.254842
YDL068W		-0.155337	0.368617	-1.03686		YDL081C	RPP1A	-0.195528	-0.322135	-0.641623
YDL067C	COX9	0.144267	-0.435453	-0.643562		YDL080C	THI3	0.198558	0.141002	0.0526672
YDL066W	IDP1	0.14603	0.453891	0.49418		YDL079C	MRK1	0.274498	0.195783	0.211267
YDL065C	PEX19	-0.200989	-0.127175	-0.313724		YDL078C	MDH3	0.206791	-0.03875	0.31816
YDL064W	UBC9	-0.0347229	-0.272419	0.353666		YDL076C	RXT3	-0.448898	-0.168363	-0.0223642
YDL063C		-0.858001	-0.0600822	0.193159		YDL075W	RPL31A	0.118367	-0.437043	0.324606
YDL062W		0.525084	0.377872	1.01332		YDL074C	BRE1	-0.997505	-1.71761	-2.2844
YDL061C	RPS29B	-0.400076	-0.236092	0.298016		YDL073W		-0.0376315	0.713614	0.356198
YDL060W	TSR1	-0.340188	-0.165767	0.174429		YDL072C		-0.27102	0.124186	-0.0702306
YDL058W	USO1	-0.444067	-0.144437	-0.136546		YDL071C		2.71896	3.13344	1.08668
YDL057W		-0.384006	0.0781265	-0.544281		YDL070W	BDF2	-0.269369	-0.220062	-0.0304948
YDL055C	PSA1	-0.310714	0.574184	-0.875031		YDL069C	CBS1	-0.352275	-0.139396	-0.339578
YDL053C	PBP4	-0.0638927	0.11036	0.00938417		YDL068W		1.04143	1.77789	1.54983
YDL052C	SLC1	-0.240515	-0.0267735	0.116162		YDL067C	COX9	-0.279748	-0.973886	-1.0134
YDL050C		-0.612248	-0.432503	-0.396975		YDL066W	IDP1	-0.269869	0.0314292	0.329032
YDL049C	KNH1	1.12073	0.40477	0.287985		YDL065C	PEX19	-0.0485249	-0.338482	-0.459892
YDL047W	SIT4	-0.29427	0.255687	-0.00287349		YDL064W	UBC9	-0.375155	-0.236906	-0.0787803
YDL046W	NPC2	0.649614	0.388431	-1.17923		YDL063C		0.00989675	-0.0512179	0.528729
YDL045C	FAD1	0.304152	0.266631	0.17305		YDL062W		1.0057	0.960743	1.03198
YDL044C	MTF2	0.127187	0.259899	0.113798		YDL061C	RPS29B	-0.124955	-0.514012	0.212211
YDL043C	PRP11	-1.38099	-0.379034	-1.49115		YDL060W	TSR1	0.63152	-0.150536	0.269389
YDL042C	SIR2	0.47941	0.780303	0.458294		YDL058W	USO1	0.618201	0.376833	-0.126663
YDL039C	PRM7	-1.50199	-0.434693	-1.28493		YDL057W		0.0760761	-0.242103	-0.273733
YDL036C		-0.0829662	-0.100791	0.367552		YDL055C	PSA1	0.327807	0.0701149	0.201981
YDL033C		-0.0741672	0.395123	0.175688		YDL053C	PBP4	0.333402	0.0313647	0.125645
YDL031W	DBP10	0.0704229	0.251845	1.01635		YDL052C	SLC1	0.119395	-0.165575	0.373665
YDL030W	PRP9	-0.532262	-0.107326	0.308004		YDL050C		0.25013	-0.241283	0.34585
YDL029W	ARP2	-0.272609	0.325477	0.666444		YDL049C	KNH1	0.259097	0.368103	-0.0491594
YDL027C		0.0853587	0.336541	0.259476		YDL047W	SIT4	0.167337	0.182614	0.369719
YDL026W		-0.640891	-0.375438	-0.0455263		YDL046W	NPC2	0.432131	0.136529	-0.122627
YDL025C		0.884238	0.580179	0.502438		YDL045C	FAD1	-0.335898	0.270783	-0.263242
YDL024C	DIA3	-0.25799	-0.181199	-0.256275		YDL044C	MTF2	0.04973	0.471177	-0.049578
YDL022W	GPD1	0.246756	0.330243	-0.201171		YDL043C	PRP11	1.39408		1.38244
YDL021W	GPM2	0.0294685	0.141236	-0.184215		YDL042C	SIR2	0.524831	0.738305	0.721727
YDL020C	RPN4	-0.0475104	0.381819	0.168009		YDL039C	PRM7	1.59266	-0.151447	1.85926
YDL019C	OSH2	-0.865585	0.176174	0.000152912		YDL036C		-0.354518	0.185586	0.305226
YDL018C	ERP3	-0.194506	-0.434193	0.0377443		YDL034W		2.19418	1.4774	0.405618
YDL017W	CDC7	-0.0826997	0.147667	-0.900647		YDL033C		-0.0772637	0.0103649	0.316854
YDL015C	TSC13	-0.171563	-0.0080722	-0.668316		YDL031W	DBP10	0.586484	0.661578	1.01293
YDL013W	HEX3	-0.149262	0.111965	0.445885		YDL030W	PRP9	-0.316928	-0.689491	-0.392727
YDL012C		0.41859	0.477974	0.0130302		YDL029W	ARP2	-0.306469	0.249114	0.602358
YDL011C		-0.352194	-0.191504	-0.256232		YDL027C		-0.0876116	-0.209898	0.19907
YDL010W		-0.32637	-0.128054	-0.318222		YDL025C		0.104033	0.284874	-0.144004
YDL008W	APC11	0.270962	0.340415	0.133026		YDL024C	DIA3	-0.910809	0.0268573	-0.373848
YDL007W	RPT2	-0.0730222	0.26811	0.21571		YDL022W	GPD1	-0.452505	-0.58521	-0.296551
YDL006W	PTC1	0.242236	-0.200739	-0.0902131		YDL021W	GPM2	0.183606	0.0211791	-0.195745
YDL005C	MED2	-0.535113	0.31794	-0.0518154		YDL020C	RPN4	0.229562	0.215955	-0.0375366
YDL004W	ATP16	0.597078	0.540184	-0.231248		YDL019C	OSH2	-0.833679	-0.983056	-2.77305
YDL003W	MCD1	0.441074	0.447666	0.437143		YDL018C	ERP3	-1.30872	-1.16105	-1.28493
YDL002C	NHP10	1.148	0.513537	0.274791		YDL017W	CDC7	-0.575141	0.778966	0.198418
YDR002W	YRB1	-0.022183	0.105355	-1.0373		YDL015C	TSC13	0.194086	0.0629675	-0.0667242
YDR003W		0.31898	0.237983	0.0958629		YDL013W	HEX3	0.529715	0.558375	0.463263
YDR004W	RAD57	-0.446898	-0.00963587	0.489632		YDL012C		0.374921	0.15893	-0.98895
YDR005C	MAF1	0.0209602	0.566082	0.545597		YDL011C		-0.813527	-0.235882	-0.274677
YDR007W	TRP1	0.153926	0.233685	0.300852		YDL010W		0.916715	0.307486	0.242818
YDR009W	GAL3	0.120227	0.625821	-0.0358322		YDL008W	APC11	-0.0799114	-0.0328182	-0.0908185
YDR010C		1.15007	0.849762	0.769259		YDL007W	RPT2	-0.947363	0.14595	0.274101
YDR011W	SNQ2	-0.695818	-0.0224958	-0.38399		YDL006W	PTC1	-0.324977	-0.0230059	-0.0824764
YDR012W	RPL4B	-0.534718	0.0572261	-0.70943		YDL005C	MED2	-0.16972	-0.00338273	0.286321
YDR013W		0.043153	0.097742	-0.0710503		YDL004W	ATP16	0.00700819	0.104022	-0.104779
YDR014W	RAD61	-0.344935	-1.14586	0.328038		YDL003W	MCD1	-0.00306604	0.0829959	0.0402711
YDR014W-A	HED1	-0.561064	-0.0205805	-0.191492		YDL002C	NHP10	0.379627	0.242022	-0.901745
YDR015C		0.362934	0.113527	0.319651		YDR002W	YRB1	0.2633	-0.329356	-0.705845
YDR017C	KCS1	0.301993	0.44553	0.439236		YDR003W		0.205575	0.369014	-0.0754976
YDR017W	CDC7	-0.428677	-0.00786463	-0.490435		YDR004W	RAD57	1.12131	0.268462	0.700181
YDR018C		-0.196672	0.276206	-0.0963295		YDR005C	MAF1	0.196841	0.205399	0.677124
YDR019C	GCV1	-0.148472	0.0718683	-0.0942629		YDR007W	TRP1	-1.00696	0.0482187	-0.876193
YDR021W	FAL1	0.0698629	0.517912	0.219469		YDR009W	GAL3	0.632816	0.199147	0.620367
YDR022C	CIS1	0.593006	0.575128	0.169935		YDR010C		-2.88318	0.676413	-0.322888
YDR023W	SES1	0.032055	-0.0554793	0.491603		YDR011W	SNQ2	0.0353304	-0.0920196	-0.81613
YDR024W	FYV1	-0.255518	0.184061	-0.206344		YDR012W	RPL4B	0.123913	-0.312386	-0.204195
YDR025W	RPS11A	-0.287255	-0.744348	-0.2687		YDR013W		0.452723	-0.122969	-0.116384
YDR026C		0.0897977	0.175756	0.489873		YDR014W	RAD61	-0.618534	-0.33111	0.251142
YDR029W		0.72699	0.593616	0.537232		YDR014W-A	HED1	-0.280769	0.0376491	-0.40087
YDR030C	RAD28	-0.28402	-0.189106	-0.165634		YDR015C		-0.555006	-0.65038	-0.552298
YDR031W		0.808287	0.247155	0.791608		YDR017C	KCS1	0.688971	0.430184	0.395322
YDR032C	PST2	-0.11924	-0.109124	-0.0905708		YDR017W	CDC7	0.0606962	-0.468126	0.0270995
YDR033W	MRH1	0.701938	1.07518	-2.29621		YDR018C		-0.135434	-0.258195	0.329142
YDR034C	LYS14	-0.081303	0.371404	-0.066445		YDR019C	GCV1	-0.243079	-0.1757	-0.153794
YDR035W	ARO3	-0.0475872	0.228696	0.0739255		YDR021W	FAL1	-0.0686542	-0.133147	0.204241
YDR036C	MRP5	-0.0474454	0.277945	0.358658		YDR022C	CIS1	0.0193412	-0.094942	-0.367629
YDR037W	KRS1	-0.602851	-0.324611	-0.0122805		YDR023W	SES1	0.168022	-0.145819	0.533499
YDR039C	ENA2	-0.153334	0.343696	-0.759467		YDR024W	FYV1	-0.935498	-0.14391	-0.000994132
YDR040C	ENA1	-0.538873	0.34963	0.265317		YDR025W	RPS11A	-0.0467408	-1.00397	-0.107523
YDR041W	RSM10	0.148987	-1.9523e-05	0.0291289		YDR026C		0.194549	0.0884211	0.153835
YDR042C		0.582562	0.539246	0.747603		YDR029W		-0.15716	-0.148222	-0.672754
YDR043C	NRG1	0.0964933	0.196334	-0.32097		YDR030C	RAD28	-0.0753817	-0.248497	0.0130101
YDR044W	HEM13	-0.321011	0.108535	-0.364108		YDR031W		-1.1622	-0.00871428	-0.477979
YDR045C	RPC11	-0.450211	-0.287384	0.385665		YDR032C	PST2	-0.0261344	-0.282877	-0.020659
YDR046C	BAP3	-0.230877	0.0645815	0.353473		YDR033W	MRH1	0.129096	-0.432688	-0.444372
YDR047W	HEM12	0.416014	0.756183	0.253723		YDR034C	LYS14	0.207196	0.485013	0.123093
YDR049W		0.73311	0.51941	1.38066		YDR035W	ARO3	-0.310936	-0.169248	-0.161895
YDR050C	TPI1	-0.212591	-0.544011	0.0651063		YDR036C	MRP5	-0.0461591	-0.118828	0.256447
YDR051C		-0.131171	0.200514	-0.100362		YDR037W	KRS1	0.00496519	-0.189032	0.329283
YDR052C	DBF4	0.117388	0.083134	-0.16898		YDR039C	ENA2	0.654154	0.781204	0.648626
YDR053W		-0.0465597	-0.0232257	-0.33812		YDR040C	ENA1	-0.196665	0.231653	0.345955
YDR054C	CDC34	-0.257103	0.233742	-0.693168		YDR041W	RSM10	-0.517791	-0.134769	-0.63541
YDR056C		0.077186	-0.0195813	-0.419999		YDR042C		0.67609	0.356565	0.629798
YDR057W	YOS9	-0.0293502	0.301434	-0.195621		YDR043C	NRG1	0.3117	0.260172	-0.230726
YDR058C	TGL2	0.298451	0.465057	0.213238		YDR044W	HEM13	-0.0500562	-0.38926	-0.0477048
YDR059C	UBC5	0.657278	0.522254	0.378089		YDR045C	RPC11	0.0821608	0.161394	0.547624
YDR060W	MAK21	-0.055956	-0.225636	0.332809		YDR046C	BAP3	0.151308	0.199284	0.436455
YDR061W		0.0179813	0.157098	0.52133		YDR047W	HEM12	0.527906	0.372128	0.616802
YDR062W	LCB2	0.190404	0.502736	0.0991496		YDR049W		0.589624	0.870389	0.664521
YDR063W		0.259877	-0.0450722	0.569686		YDR050C	TPI1	-0.172703	-0.558888	-0.513493
YDR064W	RPS13	-0.798214	-0.0205469	-0.726352		YDR051C		-0.0113433	-0.284827	0.129068
YDR065W		-0.257054	0.113043	-0.315449		YDR052C	DBF4	0.00467118	-0.0443678	0.0825378
YDR066C		-0.200663	-0.0194492	0.325148		YDR053W		1.25723	1.63327	0.532634
YDR067C		0.357175	0.257757	0.13709		YDR054C	CDC34	0.437301	0.0187083	0.0550256
YDR068W	DOS2	-2.77614	0.245783	-1.4782		YDR056C		0.285102	0.467482	-0.0897404
YDR071C	PAA1	-0.550362	-0.418149	-0.116743		YDR057W	YOS9	0.129517	0.0953495	-0.317839
YDR072C	IPT1	0.343306	0.243739	0.52593		YDR058C	TGL2	-0.122899	-0.0121368	-0.303286
YDR073W	SNF11	-0.199739	-0.404349	0.24227		YDR059C	UBC5	-0.438151	-0.0811897	-0.154466
YDR074W	TPS2	0.173666	0.448652	0.243574		YDR060W	MAK21	0.219582	0.201493	0.480269
YDR075W	PPH3	-0.0231058	0.0888519	-0.0363785		YDR061W		0.292987	0.229015	0.0312192
YDR076W	RAD55	-0.197716	0.109232	0.0894107		YDR062W	LCB2	0.261121	0.0919757	0.0106881
YDR077W	SED1	-0.262382	0.370965	-0.513267		YDR063W		-0.149499	-0.119638	0.0130175
YDR078C	SHU2	-0.164342	0.0415933	-0.0824102		YDR064W	RPS13	0.237249	-0.169754	0.395171
YDR079C-A		-0.268033	-0.12012	-0.600278		YDR065W		-0.0140614	-0.402228	-0.189506
YDR079W	PET100	0.89446	-0.123695	0.618772		YDR066C		-0.220582	-0.410935	-0.0312481
YDR080W	VPS41	-0.247549	0.381562	0.132014		YDR067C		-0.155575	-0.109517	0.0725747
YDR081C	PDC2	-0.514846	0.494744	0.0783046		YDR069C	DOA4		2.65847	1.17534
YDR082W	STN1	-0.053321	0.13313	-0.0348508		YDR071C	PAA1	-0.712092	-0.323843	0.0433247
YDR083W	RRP8	-0.320452	0.0472231	-0.110906		YDR072C	IPT1	0.335073	0.25741	0.0889472
YDR084C		0.303801	-0.30023	0.302545		YDR073W	SNF11	-0.48168	0.289916	0.0217342
YDR085C	AFR1	-0.0676624	0.171572	0.169312		YDR074W	TPS2	-0.100509	0.141572	-0.0252951
YDR086C	SSS1	-0.664819	0.00507771	-1.51039		YDR075W	PPH3	0.383663	-0.11267	0.182023
YDR087C	RRP1	-0.0103725	0.131302	0.276269		YDR076W	RAD55	-0.336388	-0.278971	-0.0323362
YDR088C	SLU7	-0.178602	0.0256692	-0.153346		YDR077W	SED1	0.719971	0.178186	-0.0188365
YDR091C	RLI1	0.131204	0.358618	-0.614052		YDR078C	SHU2	0.17864	0.461832	0.0920581
YDR092W	UBC13	0.339513	-0.359122	0.840413		YDR079C-A		0.736709	-0.113247	-0.0708379
YDR093W	DNF2	-0.0554019	0.505633	0.163147		YDR079W	PET100	0.244046	0.999449	-0.0410028
YDR094W		-0.566391	-0.114701	-0.219139		YDR080W	VPS41	0.312247	0.0931707	0.0198029
YDR095C		3.48976	0.841048	0.543471		YDR081C	PDC2	0.494662	0.546612	0.14281
YDR096W	GIS1	-0.283443	1.30497	-0.0598523		YDR082W	STN1	-0.21073	-0.381703	0.00262581
YDR097C	MSH6	1.18209	1.68475	0.476765		YDR083W	RRP8	-0.225823	-0.206086	0.0992203
YDR098C	GRX3	0.218318	-0.069795	0.600684		YDR084C		0.165683	-0.0488534	-0.213002
YDR099W	BMH2	-0.0974464	0.269951	-0.00103361		YDR085C	AFR1	0.24748	0.135639	-0.224201
YDR100W	TVP15	-0.0918148	0.0035406	0.302179		YDR086C	SSS1	0.151852	-0.48478	-0.246546
YDR101C		-0.269803	0.295714	0.11961		YDR087C	RRP1	0.371152	-0.0724718	0.330518
YDR103W	STE5	1.52632	0.546191	1.34913		YDR088C	SLU7	-0.233888	-0.261582	0.144355
YDR108W	GSG1	-1.1357	-0.54468	-0.601294		YDR091C	RLI1	0.390928	-0.0310638	-0.13041
YDR109C		0.798886	0.405359	0.345765		YDR092W	UBC13	-0.566	-0.244307	-0.0941049
YDR110W	FOB1	-0.213136	0.129799	-0.0346927		YDR093W	DNF2	0.397915	0.565247	0.19759
YDR111C		-0.39121	0.314347	-0.293372		YDR094W		-0.192773	-0.0538957	0.130619
YDR113C	PDS1	-0.166867	0.173104	-0.157737		YDR095C		0.26212	-0.108572	0.497148
YDR116C	MRPL1	0.33831	0.421366	-0.0786006		YDR096W	GIS1	0.0775601	0.489496	0.38437
YDR117C		1.51442	1.58538	1.42632		YDR097C	MSH6	-0.226604	-0.162065	1.21594
YDR118W	APC4	0.47554	0.185814	0.663952		YDR098C	GRX3	0.413521	-0.0459786	0.385143
YDR119W		-0.738328	0.0898761	0.16208		YDR099W	BMH2	0.352724	-0.043633	0.0657381
YDR120C	TRM1	0.0283088	0.209521	0.0282635		YDR100W	TVP15	0.101463	0.48667	0.337174
YDR121W	DPB4	0.0295202	0.0963633	-0.179498		YDR101C		0.255293	0.138589	0.512535
YDR122W	KIN1	0.555166	0.885228	0.428411		YDR103W	STE5	-1.32396	-2.01779	-2.31201
YDR123C	INO2	-0.0581635	0.279886	-0.29629		YDR108W	GSG1	-0.870445	-0.903433	-1.74251
YDR124W		0.117795	0.0482652	0.467458		YDR109C		0.884383	0.537536	0.451095
YDR125C	ECM18	0.153089	0.441909	-0.326077		YDR110W	FOB1	0.145787	0.0473857	-0.145203
YDR126W	SWF1	-0.310651	-0.172684	-0.270656		YDR111C		-0.333629	-0.448511	-0.045866
YDR127W	ARO1	-0.316065	0.0937641	0.467415		YDR113C	PDS1	-0.270876	-0.396857	-0.00870185
YDR128W		-0.134719	-0.204535	-0.0238301		YDR116C	MRPL1	-0.479912	0.00453805	-0.135382
YDR129C	SAC6	0.693818	0.524091	0.82716		YDR117C		4.08214	3.96293	4.14288
YDR130C	FIN1	-0.135037	0.019952	-0.3259		YDR118W	APC4	0.698133	0.538193	0.204545
YDR131C		0.234672	0.251568	0.438032		YDR119W		1.84814	1.567	1.5668
YDR132C		-0.0603971	0.397254	0.118384		YDR120C	TRM1	0.109565	0.181881	0.138363
YDR133C		-0.820392	-0.12788	-0.286		YDR121W	DPB4	-0.112098	-0.0555842	-0.274398
YDR134C		-0.858923	-0.198991	-0.52342		YDR122W	KIN1	0.212947	1.01028	0.358643
YDR135C	YCF1	0.709314	1.07801	0.493582		YDR123C	INO2	0.631643	0.477181	-0.10734
YDR137W	RGP1	-0.183296	-2.89802			YDR124W		0.158496	-0.218545	0.443739
YDR138W	HPR1	-0.509281	-0.273487	-1.68152		YDR125C	ECM18	0.108401	0.156262	0.0256046
YDR139C	RUB1	-3.22076	-2.87624	-3.23676		YDR126W	SWF1	-0.226557	-0.681851	-0.220286
YDR140W	FYV9	-0.35385	-0.252862	-0.162143		YDR127W	ARO1	-0.374141	0.188262	0.384873
YDR141C	DOP1	-0.101002	0.290367	-0.0971464		YDR128W		0.153296	-0.0432251	-0.450574
YDR142C	PEX7	0.222485	0.40628	0.285978		YDR129C	SAC6	0.135165	0.232264	-0.0591562
YDR143C	SAN1	-0.17899	-0.114172	0.391282		YDR130C	FIN1	-0.481979	0.150653	0.0135291
YDR144C	MKC7	-0.350399	0.02021	-0.130474		YDR131C		0.220735	0.0114416	-0.0216863
YDR145W	TAF12	-0.148175	-0.095074	-0.247083		YDR132C		0.565449	0.248258	0.336144
YDR146C	SWI5	0.0555962	-1.05978	1.12738		YDR133C		0.0907309	-0.000299454	0.745463
YDR147W	EKI1	1.9012	0.351499	0.576672		YDR134C		0.297671	-0.275763	0.653936
YDR148C	KGD2	1.09364	1.11966	0.00806314		YDR135C	YCF1	-0.0183375	0.650486	-0.549406
YDR149C		0.55577	0.405091	0.117882		YDR137W	RGP1	1.30561	3.28011	1.75985
YDR151C	CTH1	-0.242729	0.13159	-0.436362		YDR138W	HPR1		-0.830018	-0.826458
YDR152W	GIR2	-0.28419	-0.0754291	0.129338		YDR139C	RUB1		-4.3369	-3.60927
YDR153C	ENT5	-0.056477	0.118316	0.183752		YDR140W	FYV9	0.0468785	-0.0343867	-0.182778
YDR155C	CPR1	-0.213477	-0.574421	0.0649003		YDR141C	DOP1	-0.533255	0.206684	-0.155662
YDR156W	RPA14	0.0371942	-0.212548	0.299262		YDR142C	PEX7	0.276985	0.128439	-0.00732238
YDR158W	HOM2	-0.544415	-0.00741188	-0.243351		YDR143C	SAN1	0.0123002	0.152653	0.167042
YDR161W	TCI1	-0.238774	0.30083	-0.218798		YDR144C	MKC7	0.209879	-0.0146261	0.102937
YDR162C	NBP2	0.0115162	0.0195126	-0.469007		YDR145W	TAF12	0.520502	-0.615711	-0.062181
YDR163W		-0.0156194	0.323089	-0.38666		YDR146C	SWI5	1.8121	2.66512	2.95095
YDR164C	SEC1	-0.0718053	-0.271154	0.0784212		YDR147W	EKI1	-0.388395	-0.116944	-0.239842
YDR165W	TRM82	-1.01818	-0.36364	-0.358874		YDR148C	KGD2	0.0721042	0.427378	0.165129
YDR167W	TAF10	0.0538552	-0.634456	-0.0168683		YDR149C		-0.27499	-0.375849	-0.507305
YDR168W	CDC37	0.00698595	0.0439137	0.611729		YDR151C	CTH1	-0.320348	0.193216	-0.298039
YDR169C	STB3	-0.11639	-0.0328281	-0.535287		YDR152W	GIR2	0.0522526	-0.184719	0.067525
YDR171W	HSP42	-0.0160276	0.355564	-0.0305436		YDR153C	ENT5	-0.240536	-0.00111115	0.0694717
YDR172W	SUP35	-0.051729	0.227085	0.23799		YDR155C	CPR1	0.179645	-0.34527	-0.2561
YDR173C	ARG82	-0.260338	0.208459	-0.27353		YDR156W	RPA14	0.093796	-0.292302	0.10784
YDR174W	HMO1	0.0668584	0.0483223	0.290018		YDR158W	HOM2	-0.48723	-0.383693	-0.0717133
YDR175C	RSM24	0.173533	0.56204	-0.0596198		YDR161W	TCI1	0.0490576	-0.161022	0.249446
YDR176W	NGG1	0.415383	0.293176	0.512137		YDR162C	NBP2	0.0372783	-0.0348962	-0.23073
YDR177W	UBC1	-0.230619	-0.351223	-0.455101		YDR163W		0.0263384	-0.0509492	0.0172984
YDR178W	SDH4	0.286267	0.442127	-0.504131		YDR164C	SEC1	0.149334	0.139472	-0.144883
YDR179C	CSN9	0.209245	-0.246628	0.13933		YDR165W	TRM82	-0.338349	0.118434	0.38409
YDR179W-A		-0.644391	0.014303	-0.588054		YDR167W	TAF10	-0.0967972	-0.175038	-0.193659
YDR182W	CDC1	0.372793	0.244033	0.21472		YDR168W	CDC37	-0.00903624	-0.0355748	-0.11899
YDR184C	ATC1	-0.346118	-0.186834	-0.392177		YDR169C	STB3	0.0473878	-0.375408	-0.163559
YDR185C		-0.0668277	-0.0441504	0.470151		YDR171W	HSP42	-0.00883646	-0.160034	0.113768
YDR186C		-0.00827642	0.192091	0.211005		YDR172W	SUP35	0.489971	0.446656	0.412847
YDR187C		0.597003	0.0271583	0.0934234		YDR173C	ARG82	-0.111318	-0.31421	0.0373971
YDR188W	CCT6	0.0996639	0.173634	0.35688		YDR174W	HMO1	0.0626181	-0.0053184	0.204565
YDR189W	SLY1	-0.0939289	0.142624	0.0642958		YDR175C	RSM24	-0.039499	0.362371	0.167168
YDR191W	HST4	-0.170477	0.186407	-0.338321		YDR176W	NGG1	0.581041	0.154471	0.434239
YDR192C	NUP42	0.133089	0.161831	0.313934		YDR177W	UBC1	-0.184397	-0.29647	-0.177116
YDR194C	MSS116	0.901636	0.343722	0.783217		YDR178W	SDH4	-0.354463	-0.00330422	-0.340188
YDR195W	REF2	0.172045	0.336743	0.24204		YDR179C	CSN9	-0.429513	-0.180466	0.0395396
YDR196C		0.260479	0.261356	0.225974		YDR179W-A		0.337332	-0.0827644	0.37608
YDR197W	CBS2	-0.00589855	0.233511	-0.240687		YDR182W	CDC1	0.331946	0.292934	0.253125
YDR198C		0.0299836	0.239806	-0.100807		YDR184C	ATC1	-0.0349058	0.16279	0.182878
YDR199W		0.22361	-0.17451	0.837138		YDR185C		-0.337301	-0.17327	0.00771014
YDR200C	VPS64	0.31522	-0.195753	0.518973		YDR186C		0.358713	-0.173987	-0.326262
YDR202C	RAV2	-0.209123	0.0403629	-0.27868		YDR187C		-0.109045	-0.183936	-0.0484501
YDR203W		-0.108684	-1.42966	-1.17246		YDR188W	CCT6	0.326544	0.0343965	0.0491272
YDR204W	COQ4	-0.222724	0.12319	-0.371633		YDR189W	SLY1	-0.244849	0.0292376	0.184723
YDR205W	MSC2	-0.362341	-0.237318	-0.194913		YDR190C	RVB1	-0.192469
YDR207C	UME6	0.0034908	0.437975	0.288278		YDR191W	HST4	-0.0250421	-0.280473	-0.00909167
YDR209C		-0.539305	0.07478	-0.104318		YDR192C	NUP42	-0.190368	0.0808856	0.229285
YDR210W		-5.27594		-0.835905		YDR193W		-1.48097	2.53362	1.2029
YDR211W	GCD6	-0.797086	0.0484695	0.323186		YDR194C	MSS116	-0.0677015	0.141568	0.146548
YDR212W	TCP1	-0.342226	-0.0261891	0.259652		YDR195W	REF2	0.451938	0.227149	0.204647
YDR214W		-0.24772	0.154344	0.0541203		YDR196C		0.337047	-0.0849053	0.419625
YDR215C		-0.407906	0.0399899	0.452127		YDR197W	CBS2	-0.160884	-0.408139	-0.316724
YDR217C	RAD9	0.00890819	-0.0729118	-0.0610458		YDR198C		-0.397753	-0.217161	-0.0481478
YDR218C	SPR28	0.319721	0.511711	0.163408		YDR199W		0.0931413	-0.037895	0.221813
YDR219C			-1.96846			YDR200C	VPS64	-0.0320113	-0.248193	0.00923842
YDR221W		1.33105	0.502374	0.882364		YDR202C	RAV2	0.0451464	-0.470442	0.0233171
YDR222W		0.181499	0.227336	0.352732		YDR203W		0.602592	-0.471143	-1.74812
YDR223W		0.927856	0.856532	0.204863		YDR204W	COQ4	-0.116592	-0.305788	-0.110736
YDR224C	HTB1	-0.116855	0.187682	-0.299463		YDR205W	MSC2	-0.170623	-0.309756	-0.0690621
YDR225W	HTA1	-0.191089	0.156272	-0.497754		YDR207C	UME6	0.202333	0.807977	0.514367
YDR226W	ADK1	-0.277452	-0.250132	-0.54581		YDR209C		0.311328	0.0377588	0.822726
YDR227W	SIR4	0.184871	1.52579	0.428764		YDR211W	GCD6	-0.38148	0.0628136	0.282557
YDR228C	PCF11	-0.16263	0.19914	0.310724		YDR212W	TCP1	-0.0963475	0.25362	0.203273
YDR229W	IVY1	0.434609	0.0203862	0.361445		YDR214W		-0.0585352	-0.228533	-0.141543
YDR232W	HEM1	0.0488703	0.244768	-0.151382		YDR215C		0.0820059	0.204689	-1.48305
YDR233C	RTN1	-0.633594	-0.131056	-1.18368		YDR216W	ADR1	2.22587	0.53248	-0.490781
YDR234W	LYS4	-0.143207	0.081326	-0.213345		YDR217C	RAD9	0.233762	-0.281723	-0.117378
YDR238C	SEC26	-1.47785	-1.63908	-2.44181		YDR218C	SPR28	0.380286	0.219678	0.613846
YDR241W	BUD26					YDR221W		0.862796	1.27277	1.14202
YDR242W	AMD2	-0.753536	4.34828	-0.873304		YDR222W		0.045319	-0.0314943	0.323284
YDR245W	MNN10	-1.11413	-0.50672	0.395548		YDR223W		1.57098	2.48124	2.9052
YDR246W	TRS23	0.25444	0.000761495	0.300704		YDR224C	HTB1	-0.0255177	-0.135169	0.40082
YDR248C		0.0738189	0.344955	-0.208663		YDR225W	HTA1	-0.0762819	-0.148831	0.0795141
YDR249C		-0.28585	0.10278	-0.301744		YDR226W	ADK1	0.0650135	-0.167992	0.00936794
YDR253C	MET32	-0.172234	-0.636445	0.09793		YDR227W	SIR4	2.02614	1.2417	-0.691115
YDR255C	RMD5	-0.178835	0.384851	-0.103039		YDR228C	PCF11	0.704455	-0.712284	0.264614
YDR256C	CTA1	-0.0242738	0.212761	-0.521047		YDR229W	IVY1	-0.0248998	0.0175124	0.0482827
YDR257C	RMS1	0.241897	0.490977	0.27357		YDR232W	HEM1	-0.0225593	0.396551	-0.282396
YDR259C	YAP6	-0.390571	0.369923	-0.257558		YDR233C	RTN1	0.0796848	-0.219693	0.0938074
YDR260C	SWM1	-4.27349	0.274254	-0.365054		YDR234W	LYS4	0.218506	0.153125	0.305141
YDR262W		-0.0602488	0.889853	0.277372		YDR238C	SEC26	2.34079
YDR265W	PEX10	-0.0733154	0.0818713	-0.247669		YDR240C	SNU56	1.68571	1.79378	2.25521
YDR266C		-0.0288149	0.321938	0.328345		YDR241W	BUD26
YDR267C		0.124622	0.266259	-0.141764		YDR245W	MNN10	-0.186437	-0.890451	0.293465
YDR268W	MSW1	-0.367246	-0.273488	-0.0613626		YDR246W	TRS23	-0.000378757	-0.259296	-0.524941
YDR270W	CCC2	0.809349	0.917664	1.19253		YDR248C		-0.130892	-0.673468	-0.317435
YDR272W	GLO2	0.247678	-0.0105903	0.4		YDR249C		-0.349621	-0.310301	-0.0350496
YDR273W	DON1	-0.223873	0.103137	-0.203022		YDR253C	MET32	0.28091	0.0271482	0.671795
YDR275W		-0.101428	0.54471	-0.395156		YDR255C	RMD5	0.0619807	-0.142806	0.0803082
YDR277C	MTH1	1.68581	0.51919	0.712502		YDR256C	CTA1	-0.209846	0.468474	-0.172881
YDR279W		-0.305048	0.0689696	-0.588751		YDR257C	RMS1	-0.196852	0.0124708	0.295905
YDR280W	RRP45	0.0839285	0.288922	0.72332		YDR259C	YAP6	-0.0749237	0.000694038	0.20051
YDR281C	PHM6	-0.309624	-0.120497	0.110712		YDR260C	SWM1	2.28727	1.66321	1.71705
YDR282C		-0.30163	0.387852	0.251974		YDR262W		0.710116	0.11291	0.492823
YDR284C	DPP1	-0.181642	-0.125569	0.154802		YDR264C	AKR1	-1.08086	0.748984	-3.25963
YDR285W	ZIP1	-0.340214	0.2024	-1.00028		YDR265W	PEX10	-0.0273635	-0.27219	-0.162049
YDR286C		0.478037	0.395448	0.57325		YDR266C		0.144021	0.446834	0.39327
YDR288W		0.740375	0.771497	0.636205		YDR267C		0.131069	-0.178176	0.0162122
YDR289C	RTT103	-0.0774282	0.425115	-0.0911904		YDR268W	MSW1	-0.309637	-0.366664	0.171275
YDR291W		0.457904	0.415296	0.702389		YDR270W	CCC2	0.538939	0.643474	0.20655
YDR292C	SRP101	0.0699652	0.206889	0.254545		YDR272W	GLO2	-0.534173	-0.873157	-0.590573
YDR294C	DPL1	0.023333	0.0660285	0.308331		YDR273W	DON1	-0.247305	-0.34203	0.0821003
YDR295C	PLO2	-0.0728131	0.161253	0.391437		YDR274C		4.50819	3.821	3.11289
YDR296W	MHR1	0.443322	0.140429	0.777429		YDR275W		0.513899	0.215191	0.000513902
YDR297W	SUR2	-0.180352	0.121611	-0.12933		YDR277C	MTH1	-0.149519	-1.33827	-0.791535
YDR299W	BFR2	-0.230441	0.0360088	-0.0414897		YDR279W		-0.353884	-0.491863	-0.166031
YDR300C	PRO1	0.142341	0.108976	0.734264		YDR280W	RRP45	0.398544	0.0658725	0.447047
YDR302W	GPI11	0.43399	-0.120326	0.65985		YDR281C	PHM6	0.673726	-0.12508	1.00558
YDR303C	RSC3	0.580911	0.814649	0.776363		YDR282C		0.308689	-0.00128197	0.365686
YDR304C	CPR5	0.446302	-0.155563	0.0500691		YDR284C	DPP1	-0.357149	-0.330121	-0.229763
YDR305C	HNT2	0.169298	-0.289846	0.44916		YDR285W	ZIP1	0.391329	0.849766	0.909503
YDR307W		0.779525	-0.246834	0.0937515		YDR286C		-0.401651	0.244286	0.163206
YDR308C	SRB7	0.210943	-0.38497	0.333234		YDR288W		0.393897	0.125589	-0.0597649
YDR309C	GIC2	0.371922	-0.100341	0.124323		YDR289C	RTT103	-0.0638415	-0.235556	-0.00433172
YDR310C	SUM1	0.019079	-0.142295	0.271276		YDR291W		0.418077	0.519067	0.333756
YDR311W	TFB1	0.204691	0.999611	-0.188961		YDR292C	SRP101	0.397046	0.0847446	-0.0668972
YDR313C	PIB1	-0.625657	-0.0317129	-1.73746		YDR294C	DPL1	0.0606146	0.349334	0.184392
YDR314C		0.383428	0.276867	0.694985		YDR295C	PLO2	0.214607	0.501191	0.542295
YDR315C	IPK1	-0.296204	0.0421184	-0.790743		YDR296W	MHR1	-1.25248	-0.395217	-0.124132
YDR316W		0.190931	0.133162	-0.0770033		YDR297W	SUR2	0.0357413	-0.170809	0.0702148
YDR317W		-0.071628	0.327841	0.191285		YDR299W	BFR2	-0.285235	-0.208413	0.167024
YDR318W	MCM21	0.567606	-0.143487	0.379431		YDR300C	PRO1	-0.27085	0.0313479	0.292583
YDR319C		0.532252	-0.239174	0.437788		YDR302W	GPI11	-0.780965	0.0632209	-0.300513
YDR320C	SWA2	0.321273	0.623753	0.0101508		YDR303C	RSC3	2.4531	2.68762	2.38457
YDR320C-A	DAD4	-1.49976		-0.411099		YDR304C	CPR5	0.16425	-0.406364	-0.407229
YDR321W	ASP1	-0.297038	0.017053	-0.388535		YDR305C	HNT2	-0.0126596	-0.0284669	0.0969119
YDR322C-A	TIM11	0.319878	-0.486507	0.540865		YDR307W		-0.50368	0.340463	0.357925
YDR323C	PEP7	-0.164578	0.0996444	-0.0967805		YDR308C	SRB7	0.24033	-0.0496898	0.333084
YDR324C		0.009582	0.862418	-0.705184		YDR309C	GIC2	0.517326	-0.486119	-0.15464
YDR325W	YCG1	0.335651	0.474397	0.818529		YDR310C	SUM1	-0.0960157	-0.104662	0.0248934
YDR328C	SKP1	-0.313904	-0.390152	-0.198023		YDR311W	TFB1	0.437591	0.47865	0.356268
YDR329C	PEX3	0.00746963	0.41247	0.144686		YDR313C	PIB1	-1.07069	-0.322817	-0.664553
YDR331W	GPI8	0.412097	1.02389	0.908059		YDR314C		0.60865	-0.0886627	1.61794
YDR332W		0.0207833	0.100511	0.456846		YDR315C	IPK1	-0.781338	-0.350304	-0.488583
YDR333C		0.227978	0.74007	-0.171159		YDR316W		-0.460802	0.432159	-0.0211451
YDR334W	SWR1	0.215822	0.42543	0.340644		YDR317W		-0.163839	-0.135025	0.273726
YDR335W	MSN5	-0.272949	0.135097	-0.0904366		YDR318W	MCM21	-0.125737	0.0389073	-0.169885
YDR336W		0.0143838	0.290274	0.178846		YDR319C		-0.606997	-0.0054547	-0.193927
YDR337W	MRPS28	0.315876	0.0355097	0.0111668		YDR320C	SWA2	-0.00417935	0.249988	-0.179044
YDR338C			-2.61829	-6.62857		YDR320C-A	DAD4	-0.474177	-0.0445785	0.279718
YDR339C		-0.104158	0.179658	-0.319603		YDR321W	ASP1	0.0869177	-0.312426	-0.186503
YDR340W		-0.794101	-0.745759	0.17533		YDR322C-A	TIM11	-0.588126	-0.127546	-0.372606
YDR341C		-0.409846	0.16616	-0.311718		YDR323C	PEP7	-0.330188	-0.333087	-0.0306678
YDR342C	HXT7	1.64586	1.33073	-0.119901		YDR324C		0.117906	0.0349426	0.605937
YDR344C		-0.185557	1.14553	-0.735744		YDR325W	YCG1	0.283382	0.586226	0.76358
YDR345C	HXT3	-0.099418	0.437695	0.233335		YDR328C	SKP1	0.262914	-0.171158	-0.0812641
YDR347W	MRP1	0.20828	0.393807	0.29558		YDR329C	PEX3	-0.145831	0.0569983	0.384279
YDR348C		0.0404268	-0.101665	-0.244617		YDR331W	GPI8	0.469608	0.983743	0.711853
YDR349C	YPS7	-0.117504	0.204572	0.566733		YDR332W		0.687347	1.05011	0.471943
YDR34C	HXT6	0.532728	0.606097	0.486574		YDR333C		0.729043	0.882103	0.877548
YDR350C	TCM10	-0.224705	0.0755937	0.530741		YDR334W	SWR1	0.452589	0.323879	-0.0806804
YDR351W	SBE2	0.633073	0.955609	0.257191		YDR335W	MSN5	0.299047	0.0924605	-0.327624
YDR352W		0.283517	0.500854	0.0248028		YDR336W		0.114578	-0.0612719	0.0714924
YDR353W	TRR1	0.205183	0.1691	-0.212247		YDR337W	MRPS28	-0.612739	-0.156338	-0.120116
YDR354W	TRP4	0.111205	0.213486	0.319534		YDR338C		-0.544317	-1.35753	-0.89991
YDR357C		0.0882351	-0.349842	0.169636		YDR339C		-0.117463	0.0100936	0.190357
YDR358W	GGA1	0.170227	0.039255	0.327949		YDR340W		0.103535	-0.892826	0.24924
YDR360W		-3.57343		-3.17641		YDR341C		0.0966421	0.206278	0.244749
YDR364C	CDC40	0.425698	0.307693	-0.82694		YDR342C	HXT7	0.0757117	0.179532	-1.04683
YDR365C		-0.842898	-0.140698	0.466475		YDR344C		0.905804	2.38969	2.47647
YDR366C		-0.495461	-0.237673	0.280346		YDR345C	HXT3	0.0239965	0.60122	0.41558
YDR367W		-0.711895	-0.0473264	-0.332112		YDR347W	MRP1	0.0911833	0.0460124	0.0803338
YDR368W	YPR1	0.143612	0.310126	-0.37841		YDR348C		0.12584	-0.0246612	-0.041874
YDR369C	XRS2	-0.179757	0.256252	-0.398964		YDR349C	YPS7	0.244157	0.0801326	0.331284
YDR371W	CTS2	-0.318648	0.0759655	-0.458461		YDR34C	HXT6	1.12431	0.763458	0.585493
YDR372C		-0.336936	0.0792726	-0.304838		YDR350C	TCM10	0.269716	0.128009	0.413293
YDR373W	FRQ1	0.401129	0.348749	0.539877		YDR351W	SBE2	0.357279	0.793865	0.296395
YDR374C		-0.859413	0.028172	-1.28155		YDR352W		0.394652	0.385804	-0.251704
YDR375C	BCS1	0.404237	0.286716	0.302456		YDR353W	TRR1	0.18675	-0.337817	-0.266375
YDR376W	ARH1	-0.22997	0.00335429	-0.189632		YDR354W	TRP4	-0.210096	0.0362946	0.0562545
YDR378C	LSM6	-0.0390703	-0.0988385	-0.176447		YDR357C		-0.260235	-0.757754	0.00727023
YDR379C-A		-4.94616		-0.830929		YDR358W	GGA1	0.211756	0.248133	-0.22178
YDR379W	RGA2	0.477185	0.533886	0.367605		YDR360W		-2.07612	-0.374385	-2.40065
YDR380W	ARO10	2.94088	1.07253	1.4668		YDR364C	CDC40	1.49185	0.645692	0.966695
YDR381C-A		0.383411	0.0387947	-0.585386		YDR365C		0.568186	0.0273215	0.870056
YDR382W	RPP2B	-0.508485	-0.2278	-0.669494		YDR366C		0.120907	-0.869621	-0.0721419
YDR383C	NKP1	-0.0276198	-0.0256679	-0.094514		YDR367W		-0.0916705	0.386658	0.499511
YDR385W	EFT2	0.0507087	0.485818	-0.226625		YDR368W	YPR1	0.152955	-0.285971	-0.192979
YDR386W	MUS81	0.0895768	0.776605	0.289415		YDR369C	XRS2	-0.300072	-0.481467	-0.12873
YDR387C		0.139813	0.123864	-0.259553		YDR371W	CTS2	0.0215899	0.00843159	0.0181811
YDR388W	RVS167	0.335469	0.229896	0.389217		YDR372C		-0.134818	-0.433983	-0.111673
YDR389W	SAC7	0.340988	0.817003	-1.01151		YDR373W	FRQ1	-0.388846	-0.0955552	0.422955
YDR390C	UBA2	-0.165328	0.295348	0.452461		YDR374C		0.187693	-0.175939	-0.115803
YDR391C		0.636516	0.879402	0.199344		YDR375C	BCS1	0.0685215	-0.161114	0.0430935
YDR392W	SPT3	-0.351863	-0.249118	-0.342893		YDR376W	ARH1	-0.192814	-0.266872	-0.025508
YDR393W	SHE9	0.575522	0.199424	-0.647202		YDR378C	LSM6	-0.201979	0.126559	-0.0382142
YDR397C	NCB2	0.519906	0.129393	0.648586		YDR379C-A		1.26916	-0.729604
YDR398W	UTP5	0.0585098	0.187794	0.512234		YDR379W	RGA2	-0.87863	0.126141	-0.26115
YDR399W	HPT1	-0.649069	-0.785349	-0.00851853		YDR380W	ARO10	-0.89255	-2.53898	-1.37084
YDR400W	URH1	-0.429057	0.0542586	-0.741561		YDR381C-A		1.25951	0.0996876	-0.2693
YDR403W	DIT1	-0.34917	0.160362	-0.216673		YDR382W	RPP2B	0.258872	-0.51299	0.107562
YDR404C	RPB7	-0.320511	-0.340191	-0.40829		YDR383C	NKP1	0.0359939	-0.176289	1.7863e-05
YDR405W	MRP20	0.648299	0.0518864	0.212643		YDR385W	EFT2	0.192746	-0.074039	0.239579
YDR406W	PDR15	0.546763	1.02012	0.348979		YDR386W	MUS81	0.440104	0.798151	0.908963
YDR407C	TRS120	-0.415856	-0.0986661	-0.135681		YDR387C		0.198435	-0.0529803	-0.355086
YDR408C	ADE8	-0.750013	-0.716097	-1.06442		YDR388W	RVS167	-0.362319	-0.150143	-0.27744
YDR410C	STE14	-0.0820987	-0.660937	-0.380313		YDR389W	SAC7	0.431963	0.0944134	-0.183279
YDR411C		-0.196798	-0.101639	-0.498304		YDR390C	UBA2	0.0240969	0.328227	0.527274
YDR414C	ERD1	-0.123824	-0.01729	-0.285168		YDR391C		0.814546	-0.264923	0.159505
YDR415C		-0.25963	0.0635646	-0.368953		YDR392W	SPT3	-0.269152	-0.707161	-0.192051
YDR416W	SYF1	1.45443	0.863748	1.07522		YDR393W	SHE9	-0.455468	0.190886	-0.434121
YDR417C		-0.2367	0.113514	-0.504922		YDR397C	NCB2	-0.383969	-0.301099	-0.0170783
YDR418W	RPL12B	-0.336264	-0.0774538	-0.0530469		YDR398W	UTP5	0.536518	0.162548	0.6208
YDR420W	HKR1	0.313991	0.833831	1.2754		YDR399W	HPT1	-0.0848457	-0.19549	0.276676
YDR422C	SIP1	1.3543	0.402059	0.171371		YDR400W	URH1	-0.0245937	-0.259547	0.155749
YDR423C	CAD1	-0.125108	0.000407868	-0.0219385		YDR403W	DIT1	-0.0989918	0.236127	0.0334931
YDR424C	DYN2	-0.103887	-0.264876	-0.9989		YDR404C	RPB7	-0.838035	-0.359383	-0.214517
YDR425W	SNX41	-0.0316215	0.253512	0.091833		YDR405W	MRP20	-0.144919	0.293239	-0.263017
YDR427W	RPN9	0.253844	0.105902	0.648579		YDR406W	PDR15	0.7988	0.601635	0.251721
YDR428C		-0.315665	-0.24209	0.237422		YDR407C	TRS120	0.0399743	-0.420445	-0.216697
YDR429C	TIF35	0.232024	0.269128	0.388191		YDR408C	ADE8	-0.366369	-0.0213524	-0.102377
YDR430C	CYM1	-0.107058	-0.156599	0.407998		YDR410C	STE14	-0.392989	-0.646665	-1.19085
YDR432W	NPL3	0.339557	0.49558	0.349644		YDR411C		-0.0496669	-0.313073	-0.0383164
YDR435C	PPM1	-0.380421	-0.0519252	-0.581555		YDR414C	ERD1	-0.0830942	-0.208082	-0.0704824
YDR437W		1.35717	1.67066	0.369669		YDR415C		-0.208634	-0.373496	-0.0920802
YDR438W	THI74	-0.167614	0.0224095	-0.223067		YDR416W	SYF1	2.0376	4.25277	4.69831
YDR439W	LRS4	-0.229384	-0.0606283	-0.211797		YDR417C		0.269076	-0.33018	-0.190871
YDR441C	APT2	-0.445051	0.158395	-0.71241		YDR418W	RPL12B	-0.00572546	-0.211856	0.365729
YDR443C	SSN2	0.254579	0.375316	-0.523359		YDR420W	HKR1	0.165682	1.14337	1.13667
YDR444W		-0.669099	-0.200244	-0.241624		YDR422C	SIP1	0.140812	0.525124	0.376556
YDR447C	RPS17B	-0.282415	-0.195052	-0.55208		YDR423C	CAD1	-0.140808	-0.297916	-0.0958339
YDR450W	RPS18A	-0.594279	0.00324354	-0.29844		YDR424C	DYN2	-0.0372447	0.0574592	0.151459
YDR451C	YHP1	-0.172397	-0.0226557	-0.319287		YDR425W	SNX41	-0.358144	0.0644277	0.226326
YDR452W	PPN1	0.198789	0.00627976	0.908472		YDR427W	RPN9	-0.0429446	-0.0735925	-0.0536016
YDR453C	TSA2	0.52846	0.0147794	-0.334095		YDR428C		-0.00957469	-0.0923043	-0.275543
YDR454C	GUK1	-0.250789	-0.0514983	0.0132521		YDR429C	TIF35	0.133783	-0.0541475	0.127295
YDR456W	NHX1	0.623616	0.0763899	0.648362		YDR430C	CYM1	-0.626473	-0.0194328	-0.230525
YDR458C		0.185362	-0.138439	0.249689		YDR432W	NPL3	-0.131745	0.0645811	0.492565
YDR459C		-0.256558	0.194874	-0.449998		YDR435C	PPM1	-0.376502	-0.553421	-0.156095
YDR460W	TFB3	0.920261	0.256215	0.424968		YDR437W		1.34167	1.18676	0.19519
YDR462W	MRPL28	0.593429	0.104637	1.00507		YDR438W	THI74	-0.119065	-0.251501	0.047506
YDR463W	STP1	0.421355	0.1098	0.502474		YDR439W	LRS4	-0.191078	-0.43336	-0.135606
YDR465C	RMT2	-0.563118	0.00869438	-0.341657		YDR441C	APT2	-0.00592551	0.128737	0.188011
YDR468C	TLG1	-0.318637	-0.336569	-0.11974		YDR443C	SSN2	1.32185	-0.150087	0.47269
YDR469W	SDC1	-0.29147	0.0387761	-0.595658		YDR444W		-0.397028	-0.325422	0.0705387
YDR470C	UGO1	-0.621366	-0.296921	0.0805846		YDR447C	RPS17B	0.444939	-0.330228	0.0476905
YDR471W	RPL27B	0.00441386	-0.264424	0.225335		YDR450W	RPS18A	-0.0873781	-0.451287	0.311312
YDR472W	TRS31	0.262445	0.241102	0.402475		YDR451C	YHP1	-0.291537	-0.487189	-0.0921728
YDR474C		0.921589	0.554698	0.0873047		YDR452W	PPN1	0.799438	0.330329	0.923371
YDR475C	JIP4	0.456461	0.446416	0.989604		YDR453C	TSA2	0.663912	-0.155707	-0.425407
YDR476C		-0.0148262	-0.0804004	-0.262101		YDR454C	GUK1	-0.0581857	-0.363389	0.119429
YDR478W	SNM1	-0.318202	-0.140451	-0.612208		YDR456W	NHX1	-0.3411	-0.121023	-0.341519
YDR480W	DIG2	-0.192809	0.00526471	-0.0959282		YDR458C		0.0479141	-0.0685372	0.160861
YDR481C	PHO8	-0.0738329	0.0652073	-0.109248		YDR459C		-0.0594723	-0.374652	0.0153627
YDR482C	CWC21	-0.379343	-0.0128257	-0.199173		YDR460W	TFB3	0.482693	-0.231694	-0.26655
YDR483W	KRE2	-0.199837	0.139887	0.500881		YDR462W	MRPL28	-0.341667	-0.103175	-0.161951
YDR484W	SAC2	0.387144	0.533964	0.257028		YDR463W	STP1	-0.306966	-0.263408	-0.381465
YDR485C	VPS72	-0.0679465	-0.471544	-0.217009		YDR465C	RMT2	0.406287	0.20224	0.619755
YDR486C	VPS60	0.150113	0.378003	-0.232488		YDR466W		0.459238	-0.78874	0.225028
YDR487C	RIB3	-0.535858	-0.298654	-0.532941		YDR468C	TLG1	-0.0253421	-0.200349	0.0876678
YDR488C	PAC11	-0.400185	-0.0835562	-0.502082		YDR469W	SDC1	-0.570696	-0.206181	-0.220073
YDR490C	PKH1	0.48996	0.162624	0.672083		YDR470C	UGO1	-0.306863	-0.299784	0.230944
YDR492W		0.173167	0.204445	0.0533002		YDR471W	RPL27B	-0.143608	-0.620804	0.155254
YDR493W		0.359467	0.117596	-0.578152		YDR472W	TRS31	-0.133859	-0.0474548	-0.0550387
YDR494W	RSM28	0.831044	0.228097	-0.421412		YDR474C		0.236604	-0.209377	-0.265022
YDR495C	VPS3	0.564914	0.125957	0.431936		YDR475C	JIP4	-0.213789	-0.723491	-0.0461168
YDR496C	PUF6	-0.242486	0.0395132	0.179392		YDR476C		0.483632	-0.13259	-0.425516
YDR497C	ITR1	-0.145372	0.16524	0.405289		YDR478W	SNM1	-0.0967772	-0.284513	-0.264257
YDR498C	SEC20	-0.333494	-0.188309	-0.451246		YDR480W	DIG2	-0.0727608	0.0190633	0.0130918
YDR500C	RPL37B	-0.0517522	0.171838	-0.558537		YDR481C	PHO8	0.14127	0.189948	0.397744
YDR501W	PLM2	-0.0536	0.0701535	-0.48901		YDR482C	CWC21	0.172133	0.679391	0.0639395
YDR502C	SAM2	-0.145414	0.270344	-0.621977		YDR483W	KRE2	-0.349377	0.00351221	0.483597
YDR503C	LPP1	0.119804	0.249265	0.120366		YDR484W	SAC2	0.0620377	-0.0639275	0.177051
YDR504C	SPG3	-0.534911	-0.596277	-0.24692		YDR485C	VPS72	-0.386207	-0.0503156	0.223759
YDR507C	GIN4	-0.300114	0.272543	-0.0342492		YDR486C	VPS60	0.233009	-0.134722	0.117828
YDR508C	GNP1	0.448588	0.351938	-0.124404		YDR487C	RIB3	-0.172417	-0.369441	-0.235682
YDR509W		-0.142688	-0.106919	0.375287		YDR488C	PAC11	-0.219558	-0.375754	-0.0343266
YDR510W	SMT3	-0.385043	-0.481154	-0.0751425		YDR490C	PKH1	3.83062	0.14312	-0.0357961
YDR511W	ACN9	0.396361	0.000671305	0.656211		YDR492W		0.0708434	-0.218066	0.0329742
YDR512C	EMI1	0.853608	0.283601	0.262101		YDR493W		-0.0601112	-0.0314424	-0.195589
YDR513W	GRX2	0.886397	0.213016	0.952392		YDR494W	RSM28	-1.10305	-0.196464	-0.634487
YDR514C		0.347345	0.330751	0.297413		YDR495C	VPS3	-0.00789156	0.107532	-0.123322
YDR516C	EMI2	0.13968	0.0772417	-0.038836		YDR496C	PUF6	-0.0379187	-0.217468	0.452925
YDR517W	GRH1	-0.170055	-0.00362281	-0.294658		YDR497C	ITR1	0.193211	0.409932	0.41667
YDR518W	EUG1	-0.288557	-0.508021	-0.173007		YDR498C	SEC20	-0.27974	-0.484192	-0.0231614
YDR519W	FPR2	-0.126933	-0.0332742	0.245003		YDR500C	RPL37B	0.0694723	-0.315505	0.0696622
YDR520C		-0.433342	0.194115	0.924748		YDR501W	PLM2	0.105082	-0.260354	-0.0321408
YDR522C	SPS2	-0.36438	0.0401541	-0.408495		YDR502C	SAM2	0.0364899	-0.111667	-0.389838
YDR526C		-0.999138	0.0630151	-0.87604		YDR503C	LPP1	-0.475146	-0.108186	-0.105403
YDR527W		-0.359543	0.0476242	-0.119375		YDR504C	SPG3	-0.266669	-0.224977	0.331086
YDR528W	HLR1	0.10091	0.172688	-0.0400867		YDR507C	GIN4	0.367706	0.291015	0.220783
YDR529C	QCR7	0.657895	0.180359	1.03199		YDR508C	GNP1	-0.220534	0.241319	0.250429
YDR530C	APA2	0.492683	0.231463	0.0575487		YDR509W		1.42989	2.04947	1.69231
YDR531W		-0.254402	0.0375837	-0.265869		YDR510W	SMT3	-0.307477	-0.415064	0.175414
YDR532C	KRE28	-0.280735	0.0183437	-0.293097		YDR511W	ACN9	-0.455562	0.0911172	-0.147909
YDR533C		-0.0522486	0.495927	-0.54227		YDR512C	EMI1	-0.721131	-0.00596351	-0.285254
YDR536W	STL1	-0.707949	-0.0925227			YDR513W	GRX2	-0.158288	-0.232482	-0.447375
YDR539W		-0.137311	0.148936	0.0456156		YDR514C		-0.0871908	0.130405	0.0981374
YDR541C		-0.321516	0.0612147	-0.597039		YDR516C	EMI2	0.130511	0.119646	-0.0946303
YEL077C		-0.15195	-0.0395964	-0.0749371		YDR517W	GRH1	-0.287881	-0.33826	-0.156066
YEL073C		0.765764	0.990451	0.190546		YDR518W	EUG1	0.239844	-0.468285	-0.134159
YEL072W	RMD6	0.434651	-0.255783	-0.401956		YDR519W	FPR2	0.528153	0.212449	0.45811
YEL071W	DLD3	0.095464	0.0264661	-0.0964019		YDR520C			1.07893	1.05553
YEL070W		-0.492204	-0.200704	-1.14205		YDR522C	SPS2	-0.0264743	-0.401542	0.0905387
YEL069C	HXT13	0.719769	1.49725	-0.92662		YDR526C		2.4168	1.6253	2.01201
YEL066W	HPA3	-0.194633	-0.343519	-0.710862		YDR527W		0.182164	0.0251319	0.428682
YEL064C		0.291153	0.705755	0.254836		YDR528W	HLR1	-0.335021	-0.329161	0.0231051
YEL063C	CAN1	-0.676683	-0.0261398	-1.18366		YDR529C	QCR7	-0.302874	0.0613906	0.00327333
YEL061C	CIN8	0.466454	0.360179	-0.108447		YDR530C	APA2	0.509549	1.02453	0.188418
YEL059C-A	SOM1	-0.299034	-0.121111	-0.210948		YDR531W		-0.315186	-0.288165	-0.0313596
YEL058W	PCM1	-0.261915	-0.212844	0.388114		YDR532C	KRE28	-0.0307677	-0.386055	0.057381
YEL057C		0.32724	0.450891	0.675835		YDR533C		-0.691329	0.815431	-0.0335535
YEL056W	HAT2	1.26623	1.83046	1.78589		YDR536W	STL1	0.2142	0.897559	-3.09824
YEL055C	POL5	-0.727534	-0.482927	-0.229572		YDR539W		-0.0895731	-0.273438	0.017829
YEL054C	RPL12A	-0.233359	-0.259765	-0.447998		YDR541C		-0.191829	-0.29891	-0.148927
YEL053C	MAK10	-0.199519	-0.649007	0.49455		YEL077C		0.140703	-0.259175	-0.188782
YEL052W	AFG1	0.567172	0.270403	0.0588523		YEL073C		2.22141	2.65569	2.03526
YEL051W	VMA8	-0.0496944	-0.188302	-0.382819		YEL072W	RMD6	-0.192932	0.31772	-0.195161
YEL050C	RML2	0.448717	0.202446	0.462254		YEL071W	DLD3	-0.307332	0.444834	0.252765
YEL049W	PAU2	0.123674	-0.0612328	0.0362633		YEL070W		-0.101132	2.30695	-0.00735918
YEL047C		-0.493017	-0.0393378	-0.598901		YEL069C	HXT13	-0.099861	1.02754	0.334953
YEL046C	GLY1	0.458266	0.445403	-0.112995		YEL066W	HPA3	-0.313474	0.25091	-0.470831
YEL042W	GDA1	0.197368	0.0317742	-0.232693		YEL064C		-0.206941	0.312554	-0.10493
YEL041W		-0.0973978	-0.0677259	-0.745354		YEL063C	CAN1	0.92166	0.952714	0.664812
YEL040W	UTR2	0.00375568	-0.242505	-0.661824		YEL061C	CIN8	-0.0163582	0.665184	-0.153234
YEL039C	CYC7	0.596275	-0.0994102	-0.616525		YEL059C-A	SOM1	-0.241211	-0.350268	-0.110749
YEL038W	UTR4	-0.171384	-0.143184	-0.732387		YEL058W	PCM1	0.36419	0.965253	0.300004
YEL037C	RAD23	0.539849	0.203856	0.436785		YEL057C		0.102724	1.71731	1.00353
YEL036C	ANP1	0.203382	0.0292005	0.126982		YEL056W	HAT2	1.72687	1.8089	1.46006
YEL035C	UTR5	-0.678924	-0.204624	0.276516		YEL055C	POL5	-0.250054	0.314696	0.213334
YEL034W	HYP2	-1.32017	-0.55803	0.495013		YEL054C	RPL12A	-0.215774	-0.741578	-0.237203
YEL033W		-1.61093	-0.695379	-0.300194		YEL053C	MAK10	-0.15168	0.31511	0.186574
YEL032W	MCM3	-1.53197				YEL052W	AFG1	0.33197	1.2458	-0.0203635
YEL030C-A		0.425917	0.131825	-0.485179		YEL051W	VMA8	0.0633061	0.221214	-0.168523
YEL029C	BUD16	0.110017	-0.227599	-0.591016		YEL050C	RML2	-0.190985	0.778976	-0.106886
YEL028W		-0.5236		-0.116179		YEL049W	PAU2	0.165317	0.135575	0.303283
YEL027W	CUP5	0.188702	-0.364993	-0.956667		YEL047C		0.136999	0.680847	0.167837
YEL026W	SNU13	-0.788066	-1.15593	-1.40647		YEL046C	GLY1	0.658258	0.173897	-0.455603
YEL025C	SRI1	0.740876	0.337893	0.332493		YEL042W	GDA1	-0.101095	0.526058	-0.711149
YEL024W	RIP1	1.60171	0.952325	-1.12446		YEL041W		0.148541	0.483337	-0.285155
YEL022W	GEA2	0.0535105	-0.0356218	0.0152426		YEL040W	UTR2	-0.0894815	0.365872	-0.379197
YEL021W	URA3	-0.0371552	1.2493	0.9289		YEL039C	CYC7	-0.11363	0.301863	-0.431727
YEL020C		0.194661	0.232372	0.158812		YEL038W	UTR4	0.0382438	0.448776	-0.190738
YEL019C	MMS21	0.324551	0.565813	0.780747		YEL037C	RAD23	0.541028	0.713933	0.409255
YEL018W	EAF5	0.241561	0.0108764	0.759126		YEL036C	ANP1	0.513734	-0.16132	-0.112873
YEL017W	GTT3	0.337548	0.0140547	-0.761229		YEL035C	UTR5	0.711379	1.05994	1.28487
YEL016C		0.783847	0.108849	0.357423		YEL034W	HYP2	-0.649051	-0.234531	0.983327
YEL015W	DCP3	0.459513	0.344633	-0.311072		YEL033W		-0.642744	-0.38501	0.150427
YEL014C		-0.248026	-0.199708	0.148249		YEL032W	MCM3	-0.186943	0.704836	-1.47755
YEL013W	VAC8	-0.446171	0.0694065	-0.17798		YEL030C-A		-0.148286	0.0456996	-0.866246
YEL012W	UBC8	0.897132	-0.442509	0.781187		YEL029C	BUD16	0.184149	0.830231	0.0949518
YEL010W		0.629853	-1.97867	0.587028		YEL028W		-0.423975	1.09267	0.297459
YEL009C	GCN4	-0.231281	-0.0346312	-0.0110385		YEL027W	CUP5	-0.168978	0.236557	-0.333298
YEL008W		-0.429268	-0.57012	-0.326881		YEL026W	SNU13	-0.132212	0.114987	-0.229072
YEL006W	YEA6	0.533248	0.676104	-0.22521		YEL025C	SRI1	0.424433	0.814814	-0.195251
YEL005C	VAB2	0.107439	-0.00202565	-0.54192		YEL024W	RIP1	0.508477	1.08621	-1.03855
YEL004W	YEA4	0.163906	0.460779	0.0453567		YEL022W	GEA2	0.34758	0.290769	-0.356736
YEL003W	GIM4	-0.337005	-0.850775	0.0844753		YEL021W	URA3	-0.0899343	1.24323	1.2549
YEL002C	WBP1	-0.45963	0.218184	-0.0479791		YEL020C		0.0206469	0.3618	-0.0427581
YEL001C		0.246025	-0.273133	0.715476		YEL019C	MMS21	1.12904	0.882983	0.879742
YER002W	NOP16	0.0363186	-0.3693	-0.2439		YEL018W	EAF5	0.115916	0.451931	-0.217232
YER003C	PMI40	-0.14531	-0.202315	-0.263299		YEL017W	GTT3	-0.0232113	0.416663	-0.413921
YER004W		0.0701672	0.00238107	-0.375537		YEL016C		0.0620336	0.578107	-0.134079
YER006W	NUG1	-1.18446	-0.522888	-0.330175		YEL015W	DCP3	-0.0121805	0.549643	-0.128562
YER007C-A		-0.369624	-0.336938	-0.521599		YEL014C		-0.209508	0.325425	-0.268349
YER007W	PAC2	-0.673266	-0.562204	-0.534353		YEL013W	VAC8	0.266916	0.419125	0.109051
YER008C	SEC3	-0.2697	-0.0805717	-0.231487		YEL012W	UBC8	-0.605175	0.294296	-0.569004
YER009W	NTF2	-1.1166	-0.269517	-2.42006		YEL010W		-0.0450149	0.0865746	-0.430314
YER010C		0.0516203	-0.29355	-0.00169472		YEL009C	GCN4	-0.220463	-0.0881539	-0.140055
YER011W	TIR1	0.388178	0.713768	-0.139596		YEL008W		-1.14398	-0.542311	-0.72496
YER012W	PRE1	0.0538781	-0.298815	-0.296779		YEL006W	YEA6	0.946951	1.01525	0.159558
YER013W	PRP22	-0.287219	0.319475	0.255982		YEL005C	VAB2	-0.368497	0.674035	0.212244
YER014W	HEM14	0.484413	0.614521	0.951205		YEL004W	YEA4	0.113687	1.25567	0.401352
YER015W	FAA2	-0.394687	-0.245935	-0.482397		YEL003W	GIM4	-0.726654	-0.595524	0.183562
YER016W	BIM1	0.171609	0.819789	0.313922		YEL002C	WBP1	-0.248103	0.83799	-0.135872
YER017C	AFG3	0.461755	-0.214446	0.364072		YEL001C		-1.02088	-0.151856	-0.560044
YER018C	SPC25	-1.44351				YER002W	NOP16	0.266558	0.156008	-0.325831
YER019C-A	SBH2	-0.437809	-0.867338	-0.0306083		YER003C	PMI40	-0.159187	0.458527	0.196982
YER019W	ISC1	0.341097	-0.0721741	0.111336		YER004W		-0.237997	-0.0560622	-0.382649
YER020W	GPA2	-0.0346896	0.15599	-0.147513		YER006W	NUG1	0.0600069	0.579696	0.262812
YER021W	RPN3	-1.41467	0.0446957	-0.776822		YER007C-A		-0.362719	0.287915	-0.355897
YER022W	SRB4	0.0185202	0.177468	0.537823		YER007W	PAC2	-0.429547	0.479021	-0.171291
YER023W	PRO3	-0.0368048	-0.26814	0.402952		YER008C	SEC3	-0.168465	-0.100024	-0.190445
YER025W	GCD11	-0.894698	0.0610144	-1.31642		YER009W	NTF2	-0.437944	0.143068	-0.216642
YER027C	GAL83	-0.16807	-0.238457	-0.775553		YER010C		-0.317768	-0.202602	-0.344056
YER028C	MIG3	0.28944	0.55041	-0.160958		YER011W	TIR1	1.13292	-0.791287	0.343061
YER029C	SMB1	0.191429	-0.468329	0.193326		YER012W	PRE1	-0.182704	0.0224058	-0.153372
YER030W		0.464718	-0.358827	0.526764		YER013W	PRP22	0.342836	0.592737	0.28135
YER031C	YPT31	0.156803	-0.322355	-0.131901		YER014W	HEM14		0.720745	-1.19847
YER032W	FIR1	0.57076	-0.122117	0.217386		YER015W	FAA2	0.557489	1.61622
YER033C	ZRG8			0.0594866		YER016W	BIM1	0.926024	1.14804	0.485121
YER034W		-2.58917	-2.39091	-2.11362		YER017C	AFG3	-0.506562	0.23484	-0.912075
YER035W	EDC2	0.698576	0.280864	-0.365896		YER019C-A	SBH2	-0.636709	-0.0941361	0.101244
YER036C	KRE30	-0.138414	0.0561625	-0.595043		YER019W	ISC1	0.176046	0.626911	0.00297273
YER037W	PHM8	1.56931	1.38974	-0.305928		YER020W	GPA2	0.0220742	0.459631	-0.0524256
YER038C	KRE29	0.744073	0.645665	0.108904		YER021W	RPN3	-1.55175	0.329612	-0.63143
YER039C	HVG1	0.00542566	0.200758	-2.78759		YER022W	SRB4	0.624455	1.67647	0.276279
YER039C-A		-1.61099	-0.0953853	-4.18372		YER023W	PRO3	-0.465246	0.343748	-0.275299
YER040W	GLN3	-0.889376		2.72362		YER025W	GCD11	-0.0348198	0.424424	-0.164657
YER041W	YEN1	-0.246086	-0.181229	-0.30082		YER027C	GAL83	-0.0539096	0.413506	-0.234801
YER042W	MXR1	-0.73257	-0.637801	-0.472178		YER028C	MIG3	0.373156	0.739441	0.434986
YER043C	SAH1	-0.410381	-0.043943	-0.410746		YER029C	SMB1	-0.334862	0.387815	-0.0977497
YER044C	ERG28	-0.223651	-0.429288	-0.877066		YER030W		-0.0688174	0.536654	-0.216238
YER045C	ACA1	-1.50887	-0.17813	-0.985307		YER031C	YPT31	-0.294355	-0.00900362	-0.146325
YER046W	SPO73	1.10617	0.119167	1.67213		YER032W	FIR1	0.870262	0.855357	0.279005
YER048C	CAJ1	0.132824	-0.00204875	0.478188		YER034W		2.71373	3.4102	0.00463683
YER050C	RSM18	-0.0298338	-0.223623	-0.173656		YER035W	EDC2	-0.0581079	0.80822	0.0487049
YER052C	HOM3	-0.477805	-0.368858	-0.627396		YER036C	KRE30	0.214798	0.483291	0.338642
YER053C		1.57662	0.976809	0.518371		YER037W	PHM8	0.212572	-0.220842	-0.224418
YER054C	GIP2	1.31093	0.0691199	1.19616		YER038C	KRE29	0.177099	0.0692829	-0.0280871
YER055C	HIS1	-0.886017	-0.222392	-1.33573		YER039C	HVG1	0.782973	2.21722	0.831199
YER056C	FCY2	-0.196542	-0.15619	-0.279313		YER039C-A		0.0415068	0.14678	-1.31878
YER056C-A	RPL34A	-0.130005	-0.440617	0.169246		YER040W	GLN3			1.01761
YER057C	HMF1	-0.385728	-0.426779	-0.426954		YER041W	YEN1	-0.00810606	-0.278922	0.104529
YER060W	FCY21	-0.0470542	-0.112403	-0.557385		YER042W	MXR1	-0.317506	0.476718	0.47097
YER061C	CEM1	-0.0756888	-0.000856612	-0.433378		YER043C	SAH1	-0.193858	0.419435	-0.0158978
YER062C	HOR2	1.03151	1.6976	0.524509		YER044C	ERG28	-0.716283	0.421731	-0.618427
YER063W	THO1	0.615259	0.276277	-0.174727		YER045C	ACA1	0.373991	1.09678	0.318922
YER064C		0.240901	0.176298	-0.774282		YER046W	SPO73	0.444266	1.73273	1.10239
YER065C	ICL1	0.354535	0.0157924	0.0996371		YER048C	CAJ1	0.00109601	0.801702	0.264394
YER066W		2.47653	2.17756	1.142		YER050C	RSM18	-0.901921	0.388162	-0.401653
YER067W		1.1373	0.618144	0.659079		YER052C	HOM3	-0.646396	0.282945	-0.426079
YER068W	MOT2	-0.0477999	0.12055	-0.406721		YER053C		-0.269844	0.151586	-0.339715
YER071C		0.534496	0.572784	-0.205568		YER054C	GIP2	0.0637013	0.548298	-0.865123
YER072W	VTC1	-0.235412	-0.0979027	-0.758029		YER055C	HIS1	-0.132636	0.504779	-0.321806
YER073W	ALD5	-0.195221	-0.192134	-0.103641		YER056C	FCY2	-0.1118	0.258584	0.0306814
YER074W	RPS24A	-0.0420787	-0.000492294	0.325516		YER056C-A	RPL34A	-0.140458	-0.116802	0.0468313
YER075C	PTP3	-0.556875	-0.957336	-0.930195		YER057C	HMF1	-0.599372	0.185221	-0.0794972
YER076W-A		0.0303535	-0.0548102	-0.358206		YER060W	FCY21	0.199781	0.385262	-0.144645
YER078C		-0.375567	0.328699	0.0325416		YER061C	CEM1	0.0468967	0.796767	-0.0604096
YER079W		-0.48446	-0.0131234	-0.870296		YER062C	HOR2	1.32977	0.941666	0.303303
YER081W	SER3	-0.338694	-0.213924	-0.868518		YER063W	THO1	-0.148111	0.319742	-0.398132
YER082C	UTP7	0.291801	0.44181	0.436331		YER064C		0.57203	0.259673	-0.464057
YER083C	RMD7	-0.340188	-0.130927	-0.461557		YER065C	ICL1	-0.224903	-0.0264894	0.19518
YER084W-A		-0.187418	0.216749	-0.723497		YER066W		1.94479	1.71833	-0.264726
YER087W		0.341061	0.0722372	0.412452		YER067W		-0.847602	1.48606	-0.783739
YER089C	PTC2	0.210905	-0.0600654	0.219613		YER068W	MOT2	0.402359	0.774937	0.384596
YER090W	TRP2	-0.31442	-0.130752	-0.348804		YER071C		-0.0932557	0.426863	-0.145094
YER092W	IES5	-0.414873	-0.422397	-0.0275382		YER072W	VTC1	-0.12823	0.351866	0.403525
YER093C		0.146505	0.309508	0.321847		YER073W	ALD5	-0.095651	0.31571	0.295741
YER093C-A		-0.273464	-0.0214016	-0.282989		YER074W	RPS24A	0.33537	0.242702	0.496909
YER094C	PUP3	0.677828	0.262468	0.907188		YER075C	PTP3	-0.763456	0.122701	-0.194798
YER095W	RAD51	0.361778	0.462812	-0.182153		YER076C		4.4356	3.64299	1.47928
YER098W	UBP9	-0.0914818	0.665781	1.23736		YER076W-A		-0.160421	-0.279524	-0.872113
YER099C	PRS2	-0.254403	-0.00468819	0.669375		YER078C		-2.02233	0.698705	-0.679529
YER100W	UBC6	-0.167911	0.756809	-0.44366		YER079W		-0.248427	-0.502431	-0.186136
YER101C	AST2	-0.0969211	0.061589	-0.0033068		YER081W	SER3	-0.0494803	0.485775	0.372728
YER102W	RPS8B	-0.622501	-0.484101	-0.835964		YER082C	UTP7	0.328169	0.634603	0.0127262
YER105C	NUP157	-0.327707	-0.140785	-0.16198		YER083C	RMD7	-0.25518	0.723631	-0.366257
YER106W	MAM1	1.13538	1.27052	1.02683		YER084W-A		0.663795	-0.0834614	-0.175053
YER107C	GLE2	0.118192	0.195875	-0.307102		YER087W		0.0671073	0.505549	0.2542
YER109C	FLO8	0.543886	-2.05889	-1.10995		YER089C	PTC2	-0.158331	0.479501	0.0051229
YER110C	KAP123	-0.458626	0.079159	-0.14733		YER090W	TRP2	-0.270802	0.481922	-0.422852
YER112W	LSM4	-0.543256	-0.491157	-0.339276		YER092W	IES5	0.167719	1.11949	-0.492286
YER113C		-0.075977	-0.103218	-0.866062		YER093C		0.116677	0.00973259	0.0234266
YER114C	BOI2	-0.555853	-0.208859	-0.04542		YER093C-A		-0.714735	0.75748	-0.255888
YER115C	SPR6	1.2523	0.253787	0.480813		YER094C	PUP3	0.0144311	0.391082	-0.144199
YER116C	SLX8	0.5662	0.674459	1.00566		YER095W	RAD51	0.139134	0.999721	0.111882
YER117W	RPL23B	-0.0996785	-0.384767	0.197212		YER098W	UBP9	0.511939	2.06069	1.61531
YER119C	AVT6	0.623311	-0.108247	0.109706		YER099C	PRS2	-0.582682	0.725351	0.623962
YER120W	SCS2	-0.326173	-0.27535	-2.88691		YER100W	UBC6	0.633394	0.67212	0.275682
YER121W		-0.0444298	-0.596742	-0.716966		YER101C	AST2	0.120179	1.05092	0.460546
YER124C	DSE1	-0.243122	0.731554	-1.10858		YER102W	RPS8B	-0.280893	-0.757249	-0.208333
YER126C	NSA2	-0.157622	0.634192	0.997512		YER104W	RTT105		0.900022
YER127W	LCP5	-0.28047	-0.196203	-0.123495		YER105C	NUP157	-0.238908	0.110277	0.201021
YER128W		1.56915	0.438022	-1.15517		YER106W	MAM1	3.12342	4.58039	3.72525
YER129W	PAK1	-0.454855	0.344914	0.428504		YER107C	GLE2	0.325079	0.838434	0.160434
YER130C		0.893934	0.785974	-0.792914		YER109C	FLO8	0.175056	-0.820611	0.217533
YER131W	RPS26B	-0.381225	-0.334501	-0.356558		YER110C	KAP123	0.30225	0.0892793	-0.176684
YER132C	PMD1	-0.352614	0.761604	0.6266		YER112W	LSM4	-0.194204	-0.143519	0.0430347
YER134C		2.74626	1.80636	0.835086		YER113C		0.912517	0.0246402	-0.502169
YER136W	GDI1	0.488399	0.437102	-0.417359		YER114C	BOI2	-0.241121	-0.131785	-0.0811035
YER137C		0.114365	0.120371	0.721334		YER115C	SPR6	0.228511	0.314818	0.634845
YER138C		-0.215627	-0.573232	0.0535501		YER116C	SLX8	0.859885	1.16593	0.643271
YER139C		0.241888	-0.418253	0.0950006		YER117W	RPL23B	0.114952	-0.103314	0.0326154
YER140W		0.176946	0.104424	0.382427		YER118C	SHO1	4.18567	4.85739	1.05966
YER141W	COX15	-0.898769	0.389812	-1.17883		YER119C	AVT6	-0.238472	0.73159	-0.747081
YER142C	MAG1	0.309754	-0.44149	0.217253		YER120W	SCS2	0.408288	0.696113	-0.666101
YER143W	DDI1	-0.0997378	-0.00675023	-0.685045		YER121W		-0.727751	0.246681	-0.0182489
YER145C	FTR1	0.117696	0.116312	0.0981486		YER124C	DSE1	-0.193793	0.909576	-0.38207
YER146W	LSM5	-0.93129	-1.05002			YER126C	NSA2	1.37458	1.74264	1.7224
YER147C	SCC4	-0.0203674	-0.2225	0.152608		YER127W	LCP5	0.34523	0.592472	0.307744
YER147C-A		-0.060369	0.529073	-1.66091		YER128W		1.36496	1.96152	0.502279
YER148W	SPT15	0.209043	-0.0111628	-0.983226		YER129W	PAK1	-0.115713	0.901222	0.184543
YER149C	PEA2	-0.0878444	-0.164943	0.226029		YER130C		0.367666	0.478221	0.0738988
YER150W	SPI1	0.375109	1.42703	-0.970777		YER131W	RPS26B	-0.314991	-0.553839	0.209809
YER152C		0.0170451	0.234997	-0.213676		YER132C	PMD1	0.860234	1.00513	0.892721
YER153C	PET122	0.256065	0.355563	-0.904061		YER134C		-0.891407	0.506099	-2.28527
YER154W	OXA1	0.152796	0.038481	0.356467		YER136W	GDI1	0.240959	0.300798	-0.413113
YER156C		0.434184	0.360663	0.799045		YER137C		0.131269	0.573541	0.717752
YER158C		-0.196928	-0.0253085	-0.186756		YER138C		-0.215052	-0.669924	-0.651767
YER159C	BUR6	0.496515	-0.254474	1.10086		YER139C		-0.085157	0.0567341	-0.187336
YER160C		-0.188388	-0.473792	0.0999947		YER140W		-0.528701	0.554279	0.555893
YER161C	SPT2	0.584688	-0.0168462	0.183075		YER141W	COX15	-0.519182	0.742057	-0.764246
YER163C		0.534004	-0.184722	0.00639122		YER142C	MAG1	-0.531273	0.365012	-0.227969
YER164W	CHD1	-0.468891	0.785767	-0.0775534		YER143W	DDI1	0.181646	0.588673	-0.0278055
YER165W	PAB1	-0.100416	0.149905	-0.910517		YER145C	FTR1	-0.519903	0.673956	-0.601988
YER166W	DNF1	0.416073	0.493312	-0.337243		YER146W	LSM5	-0.585801	0.0628088	0.212061
YER167W	BCK2	-1.23568	-2.10628			YER147C	SCC4	-0.359568	0.32032	-0.073189
YER168C	CCA1	-0.265713	-0.139864	0.171932		YER147C-A		0.522604	0.209045	-0.288671
YER170W	ADK2	0.692979	-0.203591	0.147764		YER148W	SPT15	-0.26566	0.0234508	-0.347701
YER172C	BRR2	-0.993306	-0.00731429	-2.01485		YER149C	PEA2	0.0577911	-0.00413245	0.0962419
YER173W	RAD24	-0.416412	-0.779531	-0.464135		YER150W	SPI1	0.755477	0.516014	-1.52441
YER174C	GRX4	0.0384996	0.30662	-0.0551855		YER152C		-0.130015	0.101886	-0.0875387
YER175C	TMT1	0.868926	0.303686	0.330819		YER153C	PET122	1.19641	1.89193	0.878418
YER176W	ECM32	0.114774	0.0705764	0.447199		YER154W	OXA1	-0.500881	0.500903	-0.154114
YER177W	BMH1	-0.489689	-0.0322871	-0.453367		YER156C		0.525194	0.753142	0.347759
YER178W	PDA1	0.564495	0.164919	0.699634		YER158C		0.420107	1.35125	0.643569
YER179W	DMC1	0.000965379	0.0887381	-0.194408		YER159C	BUR6	-0.278015	0.265664	0.380168
YER180C	ISC10	-0.130017	0.0759487	-0.0513282		YER160C		-0.196819	-0.64938	-0.626866
YER180C-A	SLO1	0.547715	-0.397929	0.482129		YER161C	SPT2	0.248245	0.685581	0.0129838
YER182W		0.81784	0.515843	0.897044		YER163C		-0.576106	0.134898	-0.456884
YER183C	FAU1	0.295344	0.164611	0.577261		YER164W	CHD1	0.450975	0.633606	0.387223
YER186C		0.0270045	-0.101287	-0.430976		YER165W	PAB1	-0.355316	-0.270434	-0.0231309
YER187W		0.72374	0.334458	-1.23982		YER166W	DNF1	-0.255602	0.847523	-0.287198
YER187W-A	KHS1	-2.35493	0.14501			YER167W	BCK2			2.18466
YER188W		0.66033	0.431071	-0.300535		YER168C	CCA1	-0.60733	0.242384	0.101506
YFL067W		0.419599	0.257415	0.351045		YER170W	ADK2	-0.0850766	0.368287	0.521716
YFL061W		-0.386277	-0.398074	0.351899		YER172C	BRR2	0.96832	2.14621	0.458774
YFL059W	SNZ3	1.86646	0.158632	0.769437		YER173W	RAD24	-0.876334	-0.303345	-0.363339
YFL058W	THI5	0.257542	0.0789706	0.261047		YER174C	GRX4	0.0470254	0.80173	0.147936
YFL057C	AAD16	-0.458018	0.645026	-0.233929		YER175C	TMT1	-0.0217407	1.81197	-0.997759
YFL054C		1.19546		2.18335		YER176W	ECM32	0.550135	0.343612	-0.116556
YFL052W		-0.0248591	0.0767699	-0.249768		YER177W	BMH1	-0.303419	-0.0383651	-0.00713634
YFL051C				-0.425527		YER178W	PDA1	0.260534	0.476485	-0.548622
YFL049W		-0.407311	-0.0465004	-0.6605		YER179W	DMC1	-0.224128	-0.0893112	-0.0632061
YFL048C	EMP47	-0.139818	-0.141476	-0.324038		YER180C	ISC10	-0.17277	-0.0234139	0.0532856
YFL047W	RGD2	-0.897891	-0.709583	-0.0311048		YER180C-A	SLO1	0.896738	0.213498	-0.0843496
YFL046W		0.372392	-0.041716	0.517418		YER182W		-0.487809	0.645724	-0.20461
YFL045C	SEC53	0.143879	-0.116614	-0.00628743		YER183C	FAU1	0.137846	0.629021	-0.172778
YFL044C		0.0427017	0.174909	-0.318697		YER186C		0.297571	-0.0978154	-0.00215125
YFL043C		-0.083718	0.252085	-0.481416		YER187W		-0.528045	-0.641059	-0.5576
YFL042C		-0.307179	-0.255153	0.38531		YER187W-A	KHS1	-0.138022		1.73202
YFL041W	FET5	-0.161654	0.199959	-0.40273		YER188W		0.373072	0.504743	-0.120541
YFL040W		-0.389386	0.0950057	-0.135169		YFL067W		0.272896	0.152474	-0.0949865
YFL038C	YPT1	0.468911	-0.143237	0.101881		YFL061W		0.224728	0.241237	0.443502
YFL036W	RPO41	0.192801	0.0822068	0.398309		YFL059W	SNZ3	0.419707	-3.4111	-1.80917
YFL034W		-0.259533	0.00853238	-0.162437		YFL058W	THI5	0.232811	0.0951922	0.185697
YFL034C-B	MOB2	-0.00312613	-0.180116	-0.00993883		YFL057C	AAD16	-0.18342	-0.403494	-0.254202
YFL033C	RIM15	-1.05133	0.176387			YFL052W		-0.112985	0.816643	0.760084
YFL030W	AGX1	-0.14957	-0.0378539	-0.816534		YFL049W		-0.406641	-0.686253	-0.197628
YFL029C	CAK1	0.39917	0.0146995	0.547531		YFL048C	EMP47	-0.388324	-0.0582086	-0.244374
YFL026W	STE2	0.278384	-0.035562	-0.4483		YFL047W	RGD2	-0.683047	-0.940486	-0.376652
YFL025C	BST1	-0.301849	-0.0996123	-0.276795		YFL046W		0.121577	-0.173517	0.0258197
YFL023W	BUD27	0.148488	0.0858664	-0.348555		YFL045C	SEC53	0.0796401	-0.253425	0.25901
YFL022C	FRS2	-0.734533	-0.0439444	-1.09817		YFL044C		0.465391	-0.015608	0.0899774
YFL021W	GAT1	-0.134667	-0.343068	-0.378242		YFL043C		-0.100969	0.38446	0.125733
YFL020C	PAU5	-0.416555	-0.164677	-0.0119154		YFL042C		2.51232	2.51867
YFL018C	LPD1	0.392955	0.00610328	0.119625		YFL041W	FET5	0.385279	-0.523802	0.0881651
YFL017W-A	SMX2	0.0390201	0.0284235	0.360623		YFL040W		0.157185	0.360727	0.275866
YFL017C	GNA1	0.521195	0.196164	0.266082		YFL038C	YPT1	-0.0661781	-0.279385	-0.479135
YFL016C	MDJ1	-0.311052	-0.114691	0.0595462		YFL036W	RPO41	-0.97744	-0.32416	-0.275116
YFL014W	HSP12	-0.926972	-1.55211	1.02492		YFL034W		-0.0861998	-0.237014	-0.125658
YFL010W-A	AUA1	0.0584802	0.160678	-0.312193		YFL034C-B	MOB2	-0.12786	-0.30534	0.0235262
YFL008W	SMC1	-0.0755723	0.0809332	0.485166		YFL033C	RIM15	2.63923	1.7531	1.95084
YFL006W		-0.131775	-0.120652	-0.316114		YFL030W	AGX1	0.122917	-0.347857	-0.473236
YFL002C	SPB4	0.0362056	-0.129699	-0.0312854		YFL029C	CAK1	0.122497	0.145266	-0.219596
YFL001W	DEG1	-0.134533	-0.378519	0.319209		YFL026W	STE2	-0.210019	-0.643108	-0.743965
YFR001W	LOC1	-0.591127	-0.320849	-0.2253		YFL025C	BST1	-0.0240184	-0.0917994	-0.369467
YFR002W	NIC96	-1.04754	-0.355543	-0.951213		YFL023W	BUD27	0.123796	0.420948	1.24371
YFR003C		0.967497	0.387346	-0.368742		YFL022C	FRS2	-0.088	-0.23876	0.00239575
YFR004W	RPN11	0.118559	-0.0512793	-0.2691		YFL021W	GAT1	-0.348257	0.300608	-0.277734
YFR005C	SAD1	-0.364211	-0.0584565	-0.182085		YFL020C	PAU5	0.069227	0.073777	0.318171
YFR006W		-0.996606	0.163422	-0.336845		YFL018C	LPD1	-0.213633	-0.122678	-0.283024
YFR007W		0.240995	-0.531138	0.581283		YFL017W-A	SMX2	1.08263	0.232329	0.0453911
YFR008W		0.797593	-0.0985791	0.682878		YFL017C	GNA1	-0.455565	-0.304124	-0.476745
YFR010W	UBP6	0.286901	0.0575803	0.468381		YFL016C	MDJ1	-0.145975	0.11957	-0.338802
YFR011C		0.0735218	-0.0684237	0.393023		YFL014W	HSP12			2.16733
YFR014C	CMK1	0.172856	-0.0465912	-0.328615		YFL013C	IES1	0.00744488	-2.59129	-1.02775
YFR018C		1.03365	0.300381	1.07383		YFL010W-A	AUA1	0.513037	1.24617	0.825421
YFR020W		-0.215999	0.141132	0.720883		YFL008W	SMC1	0.352363	0.221226	0.0779588
YFR021W	AUT10	0.0906489	0.076052	-0.259784		YFL006W		-0.158434	-0.355966	-0.230432
YFR023W	PES4	-0.182049	0.161492	-0.457016		YFL002C	SPB4	-0.100777	-0.34344	-0.193211
YFR024C		0.497197	-0.228548	-0.200745		YFL001W	DEG1	-0.284313	-0.55871	-0.0328874
YFR025C	HIS2	-0.15418	0.157663	-0.205563		YFR001W	LOC1	-0.155884	-0.176692	0.60369
YFR028C	CDC14	-0.0281389	-0.22512	0.429301		YFR002W	NIC96	-0.480899	-0.363541	0.00437379
YFR029W	PTR3	0.708834	-0.179607	0.600157		YFR003C		-0.158006	0.388442	-0.887075
YFR030W	MET10	-1.13305	-0.890627	-1.66638		YFR004W	RPN11	-0.0763255	-0.290816	-0.322602
YFR031C	SMC2	-0.0966859	0.158598	0.298455		YFR005C	SAD1	-0.183081	-0.421276	0.193958
YFR031C-A	RPL2A	-0.186137	-0.470609	-0.157014		YFR006W		-1.43173	-0.187011	-1.04541
YFR032C		0.291767	-0.11567	0.30837		YFR007W		-1.02052	0.383788	0.126695
YFR033C	QCR6	0.187435	-0.142842	0.450182		YFR008W		-0.101293	0.148996	-0.25222
YFR034C	PHO4	0.143834	0.0596028	-0.379174		YFR010W	UBP6	-0.0278561	-0.324263	-0.0735185
YFR035C		-0.779522	-0.360963	0.0703556		YFR011C		-0.754859	-0.182053	-0.213649
YFR036W	CDC26	0.154085	-0.372562	0.28442		YFR014C	CMK1	-0.08904	-0.187122	-0.386641
YFR037C	RSC8	0.309353	-0.0840078	0.469521		YFR016C			1.79327	1.41273
YFR038W		0.141014	-1.0486	-0.124223		YFR017C		-1.66466	0.76399
YFR039C		0.0588312	0.0340473	0.704888		YFR018C		-0.446126	0.756509	-1.47799
YFR040W	SAP155	-0.251458	-0.64704	-2.3945		YFR020W		0.302176	-0.0881049	0.0571509
YFR041C		-0.0689444	-0.0682503	0.165074		YFR021W	AUT10	0.283806	0.103485	-0.235562
YFR042W		-0.226445	-0.608557	0.277952		YFR023W	PES4	-0.257405	-0.575377	-0.0567833
YFR043C		-0.340107	-0.309014	0.165687		YFR024C		-0.520495	-0.514055	-0.798046
YFR044C		-0.190808	-0.160382	0.126007		YFR025C	HIS2	0.155364	-0.040749	0.190251
YFR045W		0.00192984	0.214584	0.266196		YFR028C	CDC14	0.00208515	-0.0135424	0.115854
YFR046C		1.04009	0.454945	0.448833		YFR029W	PTR3	-0.353831	-0.330488	-0.86129
YFR047C	BNA6	0.160194	-0.212545	-0.244366		YFR030W	MET10	-0.0082639	-0.26691	0.474547
YFR048W	RMD8	-0.416333	-0.34003	-0.0918877		YFR031C	SMC2	0.440839	0.244237	0.0787789
YFR049W	YMR31	-0.262608	-0.0503247	-0.100793		YFR031C-A	RPL2A	0.0931839	-0.413139	0.0354172
YFR050C	PRE4	0.248007	-0.318437	0.385852		YFR032C		-0.144286	-0.164553	0.133747
YFR051C	RET2	-0.0860057	-0.394811	0.360576		YFR033C	QCR6	-1.06462	-0.385648	-0.0235246
YFR052W	RPN12	0.345721	0.0237605	0.667183		YFR034C	PHO4	0.255198	-0.277088	-0.131943
YFR053C	HXK1	0.107657	0.171633	-0.0716504		YFR035C		-0.443216	0.098514	0.52958
YFR054C		0.558501	-0.0259332	-0.0396689		YFR036W	CDC26	0.0183676	0.0221306	-0.077785
YFR055W	IRC7	0.222317	0.132589	-1.20312		YFR037C	RSC8	0.0493063	-0.155077	-0.148383
YGL261C		-0.19018	-0.210289	0.0747078		YFR038W		0.276224	0.533088	-0.391759
YGL257C	MNT2	0.025145	-0.0323641	0.484479		YFR039C		0.230314	-0.173291	0.116397
YGL256W	ADH4	-0.0887169	0.373995	0.00105425		YFR040W	SAP155	0.0622322		0.26304
YGL255W	ZRT1	0.0602235	0.236027	-0.04307		YFR041C		0.0775931	-0.0365645	0.517601
YGL254W	FZF1	0.815265	0.830348	0.896969		YFR042W		-0.308813	0.0912272	0.142984
YGL253W	HXK2	-0.226619	-0.150503	-1.18344		YFR043C		-0.251395	-0.0726818	0.149191
YGL252C	RTG2	0.0114451	0.0768826	-0.132921		YFR044C		-0.38234	-0.131286	-0.192843
YGL251C	HFM1	0.425694	0.266044	0.206546		YFR045W		-0.656436	0.142626	-0.0606158
YGL250W		0.120336	0.25595	-0.042644		YFR046C		0.503833	0.771114	-0.00499813
YGL248W	PDE1	1.83524	0.588263	0.695276		YFR047C	BNA6	-0.129932	0.318814	-0.0634332
YGL247W		1.03869	0.628471	1.1489		YFR048W	RMD8	-1.14328	0.637902	-0.74468
YGL246C	RAI1	0.189685	-0.129457	-0.375796		YFR049W	YMR31	-0.569684	0.050897	-0.277832
YGL245W		-1.01918	-0.458085	-0.251755		YFR050C	PRE4	0.0149187	-0.375463	-0.0799655
YGL244W	RTF1	0.128832	-0.131015	0.389215		YFR051C	RET2	0.159971	-0.110822	0.201021
YGL243W	TAD1	1.23528	1.26112	0.798163		YFR052W	RPN12	-0.00882625	0.0308198	0.0423517
YGL242C		0.291534	0.15609	0.550763		YFR053C	HXK1	0.105553	-0.354659	-0.481501
YGL241W	KAP114	-0.247841	-0.0642035	0.193967		YFR054C		-0.2814	-0.43152	-1.16254
YGL240W	DOC1	0.268441	0.33614	0.342021		YFR055W	IRC7	1.58341	0.560036	0.000656971
YGL238W	CSE1	0.0682793	0.17247	0.468021		YGL261C		0.0811507	0.222307	0.202484
YGL237C	HAP2	-0.151643	0.0136386	-0.425732		YGL257C	MNT2	0.0413601	0.0195052	0.355753
YGL236C	MTO1		-0.649731	-6.0315		YGL256W	ADH4	0.0642533	-0.0210763	-0.337255
YGL233W	SEC15	-0.331276	0.276188	-1.36405		YGL255W	ZRT1	0.955726	0.754821	1.03514
YGL231C		-0.450126	-0.459404	-0.353493		YGL254W	FZF1	0.885388	0.730866	0.68718
YGL229C	SAP4	0.493922	0.0345358	-0.223738		YGL253W	HXK2	-0.169695	-0.528103	-0.291801
YGL228W	SHE10	0.125311	0.280822	0.40926		YGL252C	RTG2	-0.327695	-0.0789213	-0.420833
YGL227W	VID30	0.0650661	0.235878	0.104754		YGL251C	HFM1	0.359036	0.328605	0.469241
YGL225W	VGR4	-0.162493	-0.0978843	-0.440116		YGL250W		0.153848	-0.223643	0.0538744
YGL224C	SDT1	0.307387	-0.136967	0.502452		YGL248W	PDE1	0.344835	-0.715009	-0.690889
YGL223C	COG1	-0.251244	0.0936077	-0.231336		YGL247W		0.562899	1.35267	0.620935
YGL222C	EDC1	1.77275	0.918124	1.84073		YGL246C	RAI1	0.261101	-0.0317317	0.246561
YGL220W		0.119146	-0.264696	0.226328		YGL245W		-0.337165	-0.29401	-0.149836
YGL219C	MDM34	0.0549895	-0.109207	0.209558		YGL244W	RTF1	-0.503938	-0.112293	-0.479049
YGL215W	CLG1	-1.04538	-0.106658	-1.27787		YGL243W	TAD1	0.880582	0.791215	0.571456
YGL214W		0.236025	-0.808845	0.33414		YGL242C		-0.666271	-0.23956	-0.919362
YGL213C	SKI8	0.535896	0.689494	0.911551		YGL241W	KAP114	-0.0657276	-0.172289	-0.329535
YGL212W	VAM7	-0.195713	0.164655	0.774605		YGL240W	DOC1	0.0726264	0.0947684	0.0318252
YGL210W	YPT32	0.250633	-0.142836	0.408743		YGL238W	CSE1	-0.0149836	0.0693836	0.153383
YGL209W	MIG2	0.756103	0.784389	-0.106833		YGL237C	HAP2	0.514194	-0.514338	-0.314733
YGL208W	SIP2	-0.111404	0.0408945	-0.556913		YGL233W	SEC15	0.0798823	-0.0944547	0.544762
YGL207W	SPT16	0.383968	0.074969	0.420909		YGL231C		-0.702684	-0.437904	-0.61709
YGL204C		0.758811	1.14523	1.93939		YGL229C	SAP4	-0.845955	0.408884	-0.121626
YGL203C	KEX1	0.179736	0.809576	0.857981		YGL228W	SHE10	-0.213739	-0.293573	-0.22707
YGL202W	ARO8	-0.852564	-0.361629	-0.554683		YGL227W	VID30	-0.280618	-0.311791	-0.00927685
YGL201C	MCM6	-0.509947	-0.144523	-0.351459		YGL225W	VGR4	0.0202799	0.156327	-0.0459764
YGL200C	EMP24	-0.529005	-0.398282	-0.638674		YGL224C	SDT1	0.272548	0.254065	0.18329
YGL198W	YIP4	0.347934	0.159959	0.625218		YGL223C	COG1	-0.228057	0.141831	-0.459837
YGL197W	MDS3	-0.336216	0.587095	-0.0062153		YGL220W		-0.60525	-0.147101	-0.529588
YGL196W		1.38235	1.08448	-2.21465		YGL219C	MDM34	-0.389194	0.196723	-0.0532947
YGL194C	HOS2	0.305821	0.226278	0.122975		YGL215W	CLG1	0.0129955	0.256928	0.350919
YGL192W	IME4	-0.509247	0.102001	0.0931201		YGL214W		-0.226934	0.646313	-0.0830916
YGL191W	COX13	0.544809	0.0259546	0.118879		YGL213C	SKI8	-0.0451417	0.426786	0.203714
YGL190C	CDC55	-0.133488	0.588739	0.105352		YGL212W	VAM7	0.275989	1.06416	0.597838
YGL186C	TPN1	0.120523	-0.166871	0.224665		YGL210W	YPT32	0.0920538	-0.452007	-0.015321
YGL185C		1.42242	1.08538	1.8004		YGL209W	MIG2	0.40913	0.393415	0.12145
YGL184C	STR3	-2.7999	-1.4746	-4.55638		YGL208W	SIP2	0.309175	0.0585665	-0.0720813
YGL180W	APG1					YGL207W	SPT16	0.531057	-0.181789	-0.14972
YGL179C		-0.237784	-0.0104094	-0.403553		YGL204C			1.47291	1.22091
YGL178W	MPT5	-0.101067	0.234746	0.261697		YGL203C	KEX1	-1.72914	0.0361881	-0.263386
YGL174W	BUD13	-0.0640355	0.0531765	-0.152875		YGL202W	ARO8	-0.619741	-0.31724	-0.0136961
YGL173C	KEM1	0.114249	0.549817	-0.355492		YGL201C	MCM6	0.0828234	-0.434106	0.0284598
YGL172W	NUP49	0.321746	-0.100675	0.175998		YGL200C	EMP24	-0.386809	-0.00571975	-0.0277721
YGL171W	ROK1	-0.144334	-0.158901	0.0264315		YGL199C		-0.968475	-0.20408
YGL170C	SPO74	-3.02983	-0.98006	1.26696		YGL198W	YIP4	0.181888	0.167762	0.0710032
YGL169W	SUA5	-0.173606	-0.0228821	-0.210033		YGL197W	MDS3	-0.180277	0.26837	0.479661
YGL168W	HUR1	-0.318718	-0.490142	0.435813		YGL196W			-1.08096	-3.61993
YGL167C	PMR1	0.0410903	-0.0427971	-0.125201		YGL194C	HOS2	-0.218525	0.0850247	-0.938896
YGL165C		-0.38989	-0.28593	-0.428459		YGL192W	IME4	-0.177375	0.505055	0.365169
YGL164C	YRB30	-0.292531	-0.252072	-0.182707		YGL191W	COX13	-1.35606	-0.44269	-0.424545
YGL162W	SUT1	-0.0334544	-0.188991	0.171404		YGL190C	CDC55	0.468544	0.318077	0.38554
YGL161C	YIP5	-0.295116	0.437048	0.768048		YGL186C	TPN1	-0.521914	0.0616513	-0.0375384
YGL159W		1.32389	1.49011	1.06128		YGL185C		0.461291	0.34612	0.306061
YGL157W		0.266974	0.992351	-0.0598242		YGL184C	STR3	0.994068	0.641474	0.983585
YGL156W	AMS1	0.135819	0.303762	-0.0581226		YGL179C		-0.212382	-0.556749	-0.000457898
YGL155W	CDC43	0.521054	0.33411	0.180854		YGL178W	MPT5	0.101962	-0.275363	0.498774
YGL154C	LYS5	0.135521	0.551136	0.587474		YGL174W	BUD13	0.13236	-0.118372	-0.0177436
YGL153W	PEX14	0.360189	0.382943	0.487877		YGL173C	KEM1	0.360625	0.0801222	0.0506909
YGL152C		0.0971443	-0.381564	0.101782		YGL172W	NUP49	0.0456421	-0.26861	-0.230604
YGL151W	NUT1	0.22626	0.416841	0.631463		YGL171W	ROK1	-0.301574	0.138996	0.175234
YGL150C	INO80	0.697061	0.970831	0.425056		YGL170C	SPO74		-2.01017	0.370469
YGL149W		0.423074	0.785794	0.38359		YGL169W	SUA5	0.466056	-0.0639508	0.051383
YGL148W	ARO2	0.120002	-0.26507	0.0213254		YGL168W	HUR1	-0.436589	-0.362597	0.105625
YGL147C	RPL9A	0.105478	-0.100682	0.176648		YGL167C	PMR1	0.335732	-0.0110948	0.41075
YGL146C		0.103395	0.55927	0.931502		YGL166W	CUP2	-0.289893	3.8832
YGL143C	MRF1	-0.26649	0.0324294	-0.318286		YGL165C		-0.0933613	-0.238969	0.581942
YGL142C	GPI10	-0.360686	0.0111264	-0.548515		YGL164C	YRB30	0.369313	0.121003	0.278941
YGL140C		-0.394282	0.950861	-0.9866		YGL162W	SUT1	0.411149	-0.390681	0.692046
YGL137W	SEC27	-0.319793	-0.136886	0.287052		YGL161C	YIP5	-0.502565	0.189908	-0.514859
YGL136C	MRM2	-0.0456483	-0.0696384	0.807104		YGL159W		1.50241	1.10979	1.04605
YGL135W	RPL1B	-1.10788	0.769048	-0.702106		YGL157W		1.253	0.284664	0.745091
YGL134W	PCL10	-0.168222	-0.315757	-0.393872		YGL156W	AMS1	0.80256	0.0793689	0.246596
YGL132W		-0.178147	-0.0365714	0.776383		YGL155W	CDC43	0.993303	0.371088	0.514737
YGL131C		-0.0515231	-0.23597	-0.165549		YGL154C	LYS5	0.44445	0.357119	0.732265
YGL130W	CEG1	-0.377981	0.256681	-0.091979		YGL153W	PEX14	0.748436	0.607118	0.415871
YGL129C	RSM23	-0.104804	-0.00697811	-0.290062		YGL152C		-0.373977	-0.151457	-0.409521
YGL128C	CWC23	0.44029	0.502965	0.182137		YGL151W	NUT1	0.227698	0.351382	0.206567
YGL127C	SOH1	-0.52778	0.114374	-0.239414		YGL150C	INO80	0.812784	0.679993	0.457524
YGL125W	MET13	0.723686	0.497896	0.524371		YGL149W		1.28904	1.00163	-0.544226
YGL124C	MON1	-2.10081	-2.43616	-2.85651		YGL148W	ARO2	0.304057	-0.195837	0.016429
YGL123W	RPS2	-0.052699	-0.00820937	-0.190915		YGL147C	RPL9A	-0.0446598	-0.2753	-0.0243017
YGL122C	NAB2	-0.0311731	0.0535505	-0.416527		YGL146C		-0.811579	1.10005	0.691186
YGL121C	GPG1	1.38368	-0.183316	-0.517106		YGL143C	MRF1	0.603012	0.075168	0.152286
YGL119W	ABC1	-0.200856	-0.0794122	-0.413844		YGL142C	GPI10	-0.339388	-0.739585	-0.219061
YGL118C		1.68893	1.51713	1.40578		YGL140C		0.0495646	0.581166	-0.338279
YGL116W	CDC20	-0.383318	-0.212088	-0.269413		YGL137W	SEC27	0.725667	0.116414	0.4833
YGL115W	SNF4	-0.0616918	-0.421463	0.319011		YGL136C	MRM2	-0.194345	-0.0898089	0.332821
YGL112C	TAF6	0.222452	0.190028	0.0357625		YGL135W	RPL1B	-0.0509005	0.100659	0.646498
YGL111W	NSA1	0.256435	0.421146	0.485283		YGL134W	PCL10	0.0216192	0.660352	0.438493
YGL110C	CUE3	0.518584	0.0198815	0.507778		YGL133W	ITC1	3.10868	2.4265	-1.39823
YGL109W		0.745775	0.367054	0.29586		YGL132W		1.01989	1.18732	1.30344
YGL108C		0.232487	0.110774	0.160764		YGL131C		0.14644	-0.280635	-0.034534
YGL106W	MLC1	0.482021	0.0314332	-0.63703		YGL130W	CEG1	0.307382	-0.173355	0.208017
YGL105W	ARC1	0.0632351	0.156884	-0.11685		YGL129C	RSM23	0.00177216	0.159583	-0.654305
YGL104C	VPS73	0.0275081	-0.480227	-0.357583		YGL128C	CWC23	1.35355	0.600449	1.23972
YGL103W	RPL28	-0.296732	-0.112232	-0.207598		YGL127C	SOH1	-0.00269584	-0.55879	0.0947622
YGL102C		-0.340154	0.22983	-0.355185		YGL125W	MET13	0.557825	0.984805	0.264771
YGL101W		-0.144694	0.131043	-0.302818		YGL124C	MON1	-3.71528	-3.46322	-2.11909
YGL100W	SEH1	-0.113689	-0.344861	-0.0424155		YGL123W	RPS2	0.283707	-0.46432	-0.109861
YGL099W	LSG1	-1.22612	-0.786554	-0.000915354		YGL122C	NAB2	0.190392	0.128503	0.149446
YGL098W	USE1	0.366917	-0.137479	0.41534		YGL121C	GPG1		-0.565636
YGL097W	SRM1	0.174095	-0.060182	0.58885		YGL119W	ABC1	-0.0660277	-0.11972	-0.405435
YGL096W	TOS8	-0.212699	1.26746	0.394149		YGL118C		-9.42415	-6.53828	-4.80004
YGL094C	PAN2	0.624319	0.149776	0.0620103		YGL116W	CDC20	0.00771203	-0.212537	-0.102385
YGL092W	NUP145	-0.30673	-0.176437	-0.378064		YGL115W	SNF4	-0.23676	-0.0306898	-0.0415385
YGL091C	NBP35	-0.0751629	-0.0636142	0.268199		YGL112C	TAF6	0.226268	-0.231851	-0.6951
YGL090W	LIF1	-0.0167969	0.288348	-0.198552		YGL111W	NSA1	0.572159	0.42828	-0.217343
YGL089C	MFAlpha2	-0.404243	0.516729	0.321061		YGL110C	CUE3	0.193193	0.145279	0.26068
YGL088W		-2.91857	-0.304231	-1.08637		YGL109W		-0.331243	0.0609858	-0.285924
YGL087C	MMS2	-0.0234478	-0.418714	-0.789735		YGL108C		-0.255737	-0.0986265	-0.109757
YGL084C	GUP1	-0.0784822	-0.286984	0.0371128		YGL106W	MLC1	0.101818	-0.572606	-1.00126
YGL082W		1.2474	1.08262	0.334897		YGL105W	ARC1	0.178871	-0.0879153	-0.0854937
YGL080W		0.771746	-0.0451479	0.517057		YGL104C	VPS73	-0.326026	-0.0915312	-0.415262
YGL079W		-0.271874	-0.0450592	-0.27911		YGL103W	RPL28	-0.254041	-0.37923	0.267344
YGL078C	DBP3	-0.449299	-0.186466	-0.145935		YGL102C		-0.0795365	-0.33309	0.104363
YGL077C	HNM1	-0.718089	-0.302674	-0.504369		YGL101W		0.0119094	-0.225963	0.111632
YGL076C	RPL7A	-0.49918	-0.107003	-0.687574		YGL100W	SEH1	0.421033	0.152509	0.231496
YGL075C	MPS2		2.05901	-1.96585		YGL099W	LSG1	-0.528644	-0.811126	-0.165137
YGL074C		-0.45318	-0.173456	0.144372		YGL098W	USE1	0.0931039	-0.169316	-0.319814
YGL073W	HSF1	-0.360812	1.48265	-0.35665		YGL097W	SRM1	-0.0775748	-0.128743	0.140249
YGL072C		-0.179538	-0.208097	0.252926		YGL096W	TOS8	0.426006	1.1057	0.93134
YGL071W	RCS1	-0.590863	-0.148996	0.147879		YGL094C	PAN2	0.770996	0.193435	-0.138341
YGL070C	RPB9	-0.204698	-0.246204	-0.334166		YGL092W	NUP145	-0.134459	-0.0264394	-0.332475
YGL069C		1.61371	1.10986	0.638054		YGL091C	NBP35	0.371461	0.305757	0.183617
YGL068W		-0.210572	0.302221	0.356976		YGL090W	LIF1	0.635217	0.315345	0.302267
YGL067W	NPY1	0.786429	0.919309	0.447323		YGL089C	MFAlpha2	-1.38555	0.143759	-0.465157
YGL066W	SGF73	0.129268	-0.222997	-0.254592		YGL088W			-0.116646	-2.1621
YGL065C	ALG2	0.414334	0.0647917	0.162199		YGL087C	MMS2	-0.502422	-0.0551693	-0.223775
YGL064C	MRH4	-0.258592	-0.412026	-0.337314		YGL084C	GUP1	-0.159493	0.00722882	-0.0335667
YGL063W	PUS2	1.33088	0.925705	1.44407		YGL083W	SCY1
YGL062W	PYC1	0.956613	0.460745	-0.00981604		YGL082W		0.63874	0.427191	0.133488
YGL061C	DUO1	0.223084	0.205939	-0.00169354		YGL080W		0.632171	0.231222	-0.388609
YGL058W	RAD6	0.70486	0.00213678	-0.23459		YGL079W		0.00626819	0.388277	-0.128229
YGL057C		0.118543	0.503533	0.601418		YGL078C	DBP3	0.278643	-0.0231296	0.415281
YGL056C	SDS23	-1.75769	0.486069	-2.07058		YGL077C	HNM1	-0.026195	0.118461	0.208595
YGL055W	OLE1	-2.11334	0.727608	-2.02849		YGL076C	RPL7A	0.0162375	-0.411739	-0.39407
YGL054C	ERV14	0.590956	0.108335	-0.276613		YGL075C	MPS2	-7.32112	1.34868	1.12142
YGL053W	PRM8	0.46081	0.291751	0.75771		YGL074C		-0.115475	-0.348004	-0.0495448
YGL051W	MST27	0.846512	0.388896	0.584687		YGL073W	HSF1	0.317612	-0.291536	0.376222
YGL050W		-0.377523	0.0835812	0.408294		YGL072C		-0.406268	-0.134638	-0.0124155
YGL049C	TIF4632	0.00512703	0.453632	-2.37362		YGL071W	RCS1	-0.50072	0.136354	-0.0622699
YGL048C	RPT6	0.76442	0.628503	0.715657		YGL070C	RPB9	-0.40793	-0.158964	-0.45794
YGL047W		0.48995	-0.310266	0.776356		YGL069C			0.615119
YGL046W		0.0459631	-0.634805	-1.64787		YGL068W		-0.640525	0.439135	-0.634028
YGL045W	RIM8	0.0160324	0.679613	-0.730492		YGL067W	NPY1	0.844044	0.60139	0.629643
YGL043W	DST1	-0.00829446	0.732513	-0.777433		YGL066W	SGF73	-0.0735078	-0.20103	-0.0895681
YGL042C		-0.692387	-0.0195866	-0.599144		YGL065C	ALG2	-0.0157143	0.261602	0.0389948
YGL040C	HEM2	0.563042	0.10997	0.785308		YGL064C	MRH4	-0.313219	0.170663	-0.139109
YGL039W		0.160532	0.160659	0.620297		YGL063W	PUS2	1.4083	0.841123	1.28284
YGL038C	OCH1	0.185747	-0.418817	0.117405		YGL062W	PYC1	0.592097	0.311865	-0.347036
YGL037C	PNC1	0.517689	0.247834	-0.24309		YGL061C	DUO1	0.4801	-0.192952	0.193162
YGL036W	MTC2	-1.57343	0.737192	0.0537841		YGL058W	RAD6	0.225034	-0.479916	-0.41134
YGL035C	MIG1	0.171468	-0.124797	-0.421584		YGL057C		0.675338	0.308103	0.645246
YGL033W	HOP2	0.498717	-0.285145	0.859256		YGL056C	SDS23	-0.59125	0.57398	0.174592
YGL032C	AGA2	2.67458	0.487563	0.122507		YGL055W	OLE1	-0.414349	0.320789	0.108008
YGL031C	RPL24A	-0.3623	-0.288725	-0.230436		YGL054C	ERV14	0.0237072	0.0310805	-0.134309
YGL030W	RPL30	-0.111959	0.0260638	-0.60088		YGL053W	PRM8	0.245083	0.258136	0.400955
YGL029W	CGR1	-0.428224	-0.134858	0.153453		YGL051W	MST27	0.464734	0.153109	0.444822
YGL025C	PGD1	-0.0288183	0.0330462	-0.172473		YGL050W		0.408381	0.0421749	0.584428
YGL019W	CKB1	0.12782	0.141779	0.337102		YGL049C	TIF4632	0.145512	0.334299	0.233364
YGL018C	JAC1	0.452237	0.749856	-0.117921		YGL048C	RPT6	0.636585	0.279338	0.362887
YGL017W	ATE1	-0.189285	-0.221172	-0.363558		YGL047W		-0.68309	-0.753407	-0.247783
YGL013C	PDR1	-0.049938	0.0623487	-0.148061		YGL046W		-0.569825	-1.50098	-1.49436
YGL012W	ERG4	-0.132435	0.00647795	-0.287248		YGL045W	RIM8	0.0282843	0.0174446	0.121213
YGL011C	SCL1	-0.0226032	0.0590506	-0.424275		YGL043W	DST1	0.296741	0.393824	-0.255218
YGL006W	PMC1	0.322486	0.369143	0.157027		YGL042C		-0.159408	-0.0955202	0.158001
YGL005C	COD5	0.333158	0.0377088	-0.0116738		YGL041C		-1.1781	0.510411	-0.345456
YGL004C	RPN14	-0.192407	-0.0237764	-0.336319		YGL040C	HEM2	0.251441	0.28544	0.109247
YGL003C	CDH1	-0.449584	-0.535259	-0.537439		YGL039W		0.940954	0.220177	0.891114
YGL002W	ERP6	0.12629	0.0569103	-0.952512		YGL038C	OCH1	0.396054	-0.056296	0.190874
YGL001C	ERG26	-0.0984399	-0.209624	0.48907		YGL037C	PNC1	-0.604067	-0.109812	-1.2031
YGR002C		0.186811	-0.0410992	-0.67616		YGL036W	MTC2	0.829309	0.694597	0.820339
YGR004W		0.403151	0.291943	-0.0693907		YGL035C	MIG1	0.422381	-0.261498	-0.0265067
YGR005C	TFG2	-0.196219	0.300352	-0.266267		YGL033W	HOP2	0.763704	0.207956	0.769546
YGR007W	MUQ1	-0.439016	-0.0144565	0.641788		YGL032C	AGA2	-0.840136	-1.87222	-1.54199
YGR008C	STF2	0.404071	0.262635	-0.00582485		YGL031C	RPL24A	-0.101397	-0.463968	-0.0604545
YGR009C	SEC9	-0.271204	-0.212881	-0.171915		YGL030W	RPL30	0.254219	-0.214025	0.160637
YGR010W	NMA2	1.01484	0.487932	-0.918051		YGL029W	CGR1	0.0975702	-0.236234	0.174583
YGR012W		-0.0247698	-0.0580175	-0.29961		YGL025C	PGD1	1.01853	-0.578912	0.409359
YGR013W	SNU71	-0.323469	-0.186103	-0.850625		YGL019W	CKB1	-0.065725	0.0290714	0.129992
YGR014W	MSB2	-0.50964	-0.0758288	-0.443612		YGL018C	JAC1	-1.42949	0.39149	-1.65727
YGR015C		0.60811	0.579075	0.930587		YGL017W	ATE1	0.0358408	-0.284544	-0.29765
YGR016W		-1.29005	1.28572	-1.16201		YGL013C	PDR1	0.406531	-0.248726	0.0981802
YGR017W		-0.0665911	0.0818252	0.386716		YGL012W	ERG4	-0.524769	0.0438934	-0.405346
YGR019W	UGA1	0.413705	0.1449	-0.415383		YGL011C	SCL1	0.0354431	-0.519884	-0.198797
YGR020C	VMA7	0.29832	-0.1557	-0.973326		YGL006W	PMC1	0.0437636	0.360222	-0.193618
YGR021W		0.85039	0.663435	-0.0547289		YGL005C	COD5	0.476442	0.283612	-0.184936
YGR022C		0.122018	0.944621	1.12515		YGL004C	RPN14	0.40671	-0.16847	-0.0446322
YGR023W	MTL1	-0.651038	0.191345	-1.19937		YGL003C	CDH1	-0.543764	0.156333	-1.22127
YGR024C		-0.114192	-0.0781983	0.0136319		YGL002W	ERP6	-1.61261	0.306126	-0.504134
YGR025W		-0.145386	-0.203351	0.282595		YGL001C	ERG26	0.129897	0.0028942	0.0788929
YGR026W		-0.00710935	-0.200441	0.150524		YGR002C		0.232321	0.276817	0.109447
YGR027C	RPS25A	-0.663315	-0.249095	-0.257287		YGR004W		-0.406533	-0.115809	-0.580363
YGR028W	MSP1	0.305908	0.281008	0.765021		YGR005C	TFG2	0.122892	-0.0133884	-0.0675075
YGR029W	ERV1	-0.0593448	-0.406635	0.0165347		YGR007W	MUQ1	-0.37141	0.137569	0.310735
YGR030C	POP6	-0.0938089	-0.110415	-0.218382		YGR008C	STF2	-0.564207	-0.423547	-0.456329
YGR032W	GSC2	-0.104862	0.387898	0.944542		YGR009C	SEC9	-0.443874	0.0427221	-0.2453
YGR033C		1.1137	0.795116	0.125131		YGR010W	NMA2	0.52565	0.0387114	-1.46947
YGR034W	RPL26B	-0.248708	-0.0483645	-0.278378		YGR012W		-0.0932319	0.224291	0.385619
YGR035C		-0.760753	-0.102824	0.751179		YGR013W	SNU71	-0.360422	-0.555537	-0.148683
YGR036C	CAX4	0.460017	0.451374	0.212035		YGR014W	MSB2	0.0379899	-0.220749	-0.192434
YGR037C	ACB1	-0.758556	0.371991	-0.257988		YGR015C		0.374323	0.553051	0.391913
YGR038W	ORM1	0.241626	0.147359	0.962014		YGR016W		-1.47613	0.6496	0.122024
YGR040W	KSS1	0.519928	0.451031	1.15474		YGR017W		-0.287576	-0.179387	-0.513412
YGR041W	BUD9	0.490453	0.0344782	-0.0906567		YGR019W	UGA1	-0.503	-0.335816	-0.534234
YGR042W		1.07278	0.647021	1.20608		YGR020C	VMA7	-0.106037	0.185565	-0.466694
YGR043C		1.57739	0.583303	0.649928		YGR021W		0.260497	0.612965	-0.15562
YGR044C	RME1	3.55549	1.48484	1.07895		YGR022C		-0.836454	-0.125776	0.147794
YGR046W		0.997505	0.600214	0.260655		YGR023W	MTL1	0.676377	-0.333214	-0.302472
YGR047C	TFC4	0.0598066	-0.0059403	0.117145		YGR024C		0.144177	-0.251256	-0.0789148
YGR048W	UFD1	0.89405	0.436356	0.847206		YGR025W		-0.941222	-0.477229	0.00717646
YGR049W	SCM4	-0.332572	-0.248606	0.0861786		YGR026W		-0.321624	-0.115958	-0.167914
YGR050C		-0.996912	-0.260874	-0.158159		YGR027C	RPS25A	-0.198188	-0.308221	0.242349
YGR051C		-0.128718	-0.0114439	-0.385776		YGR028W	MSP1	0.731861	0.236644	0.752701
YGR052W		-0.369354	1.88233	-2.09084		YGR029W	ERV1	-0.193742	-0.322298	0.0148221
YGR054W		0.0610648	0.186089	-0.0186086		YGR030C	POP6	-0.76596	-0.122683	0.112765
YGR055W	MUP1	0.132696	-0.232531	0.106778		YGR032W	GSC2	1.2778	-0.209594	1.19574
YGR058W		1.1841	1.42448	0.947615		YGR033C		0.267048	-0.0703038	-0.68635
YGR060W	ERG25	-0.929983	0.112161	0.08414		YGR034W	RPL26B	0.413958	-0.163166	0.316629
YGR061C	ADE6	-0.875463	-0.491738	-0.580059		YGR035C		-0.476134	-0.350249	-0.158802
YGR062C	COX18	0.247275	0.0322156	0.680957		YGR036C	CAX4	0.316358	0.555638	0.408599
YGR063C	SPT4	-4.37058	-0.581721	-1.3649		YGR037C	ACB1	0.152959	-0.298106	0.162624
YGR064W		-3.34273	0.0589677	-2.01501		YGR038W	ORM1	-0.00730918	0.149426	0.305072
YGR065C	VHT1	-0.112929	-0.0733588	0.0705111		YGR040W	KSS1	0.551262	0.238882	1.04321
YGR068C		-0.0363373	0.303768	-0.000825263		YGR041W	BUD9	0.180035	0.563923	0.223405
YGR071C		-0.358526	0.0213417	-0.299596		YGR042W		0.551919	0.699008	0.430242
YGR073C		0.896811	0.177273	-0.922058		YGR043C		0.0886818	-1.67164	-1.27103
YGR074W	SMD1	0.880424	-0.0525291	0.0877323		YGR044C	RME1	-0.046496	-1.76969	-2.04561
YGR075C	PRP38	0.345677	-0.0792153	0.836092		YGR046W		0.282477	-0.0145775	-0.159027
YGR076C	MRPL25	-0.235857	-0.269998	-0.558342		YGR047C	TFC4	0.448252	0.0993494	0.189878
YGR078C	PAC10	0.112731	-0.186556	0.365115		YGR048W	UFD1	0.139367	-0.175759	0.115603
YGR079W		0.88215	0.159537	0.75223		YGR049W	SCM4	-0.431429	-0.164045	0.178187
YGR080W	TWF1	-0.160767	0.310398	-0.326847		YGR050C		-0.285166	-0.333318	0.469469
YGR081C		-0.323704	-0.144923	-1.22382		YGR051C		0.0784694	0.0531036	-0.13132
YGR082W	TOM20	-0.922082	0.257126	0.306707		YGR052W			-1.88503
YGR084C	MRP13	0.307921	-0.0258292	0.497705		YGR054W		-0.662052	0.226273	-0.109991
YGR086C	PIL1	0.712782	0.735882	1.17604		YGR055W	MUP1	-0.135263	-0.120382	-0.113928
YGR087C	PDC6	-0.353405	0.228855	-0.00283011		YGR058W		1.75274	1.59164	1.41698
YGR090W	UTP22	-0.574704		-2.56832		YGR060W	ERG25	0.346791	0.342393	0.252647
YGR091W	PRP31	-0.564218	-0.197092	-0.690045		YGR061C	ADE6	-0.326689	-0.122269	-0.49898
YGR092W	DBF2	-0.33994	-0.286034	-0.181303		YGR062C	COX18	-0.897321	0.0734856	0.109105
YGR093W		-0.0669226	-0.136746	0.289571		YGR063C	SPT4	-1.00515	-0.0579945	-0.235786
YGR094W	VAS1	-0.749508	-0.189296	-0.22556		YGR064W		-0.0165007	0.703278	1.09982
YGR095C	RPR46	-0.235727	-0.397832	-0.00676482		YGR065C	VHT1	-0.781782	-0.247008	-0.752922
YGR096W	TPC1	0.28384	0.3237	0.367073		YGR068C		0.294985	0.0274934	0.314767
YGR097W	ASK10	0.290952	-0.00545404	0.274435		YGR071C		-0.0700684	0.170461	0.0943389
YGR101W	PCP1	0.286457	0.336182	0.699884		YGR073C		-0.0766264	-0.349445	-1.43304
YGR102C		0.172574	0.0757527	0.161559		YGR074W	SMD1	0.107943	-0.17681	-0.635269
YGR103W	NOP7	-0.666332	-0.564109	-0.332866		YGR075C	PRP38	-0.381663	-0.0496175	0.00698837
YGR104C	SRB5	-0.00810612	-0.0737182	0.380141		YGR076C	MRPL25	-1.34255	-0.0459255	-0.7504
YGR105W	VMA21	-0.961755	-0.69681	-0.528589		YGR078C	PAC10	-0.456511	-0.273308	0.0885565
YGR106C		-0.125979	-0.26368	-0.207639		YGR079W		1.14979	0.219402	0.679133
YGR107W		1.13316	-0.370265	1.91217		YGR080W	TWF1	0.162708	-0.0342066	0.137558
YGR108W	CLB1	0.463835	0.12076	0.0105728		YGR081C		-0.087062	0.0801091	-0.0581898
YGR109C	CLB6	0.657081	0.309043	0.813105		YGR082W	TOM20	-1.48381	-0.181172	0.153581
YGR110W		-0.0734616	0.185969	-0.413578		YGR084C	MRP13	-0.510828	-0.157399	-0.360201
YGR111W		0.866636	2.41014	2.14817		YGR086C	PIL1	0.400807	0.461838	0.350905
YGR112W	SHY1	3.1995	3.3649	4.09267		YGR087C	PDC6	0.545239	-0.159971	-0.738374
YGR113W	DAM1	0.604508	-0.312657	-0.0166872		YGR090W	UTP22	1.40203	-0.63877
YGR114C		-0.746317	-0.707167	0.0803071		YGR091W	PRP31	0.524408	-0.326868	0.164077
YGR115C		-0.209091	-0.153631	0.288783		YGR092W	DBF2	-0.130447	-0.401156	-0.734244
YGR117C		-0.164393	-0.206205	-0.414888		YGR093W		0.138303	0.10122	0.211198
YGR118W	RPS23A	-0.143547	-0.401308	0.0423897		YGR094W	VAS1	-0.0631071	-0.157817	0.173666
YGR119C	NUP57	0.0982239	0.0337601	0.316617		YGR095C	RPR46	-0.118292	-0.361314	-0.139868
YGR120C	COG2	-0.100734	-0.0882453	0.170465		YGR096W	TPC1	0.0997666	0.350752	0.5041
YGR121C	MEP1	-0.227915	0.0980023	-0.466276		YGR097W	ASK10	-0.313385	0.0530082	-0.266526
YGR122W		1.07332	0.534369	1.04456		YGR101W	PCP1	0.124278	0.0993772	0.00381835
YGR123C	PPT1	-0.881858	0.0496898	-0.605877		YGR102C		0.165666	0.19334	-0.374408
YGR124W	ASN2	-0.0531397	-0.00933864	-0.346096		YGR103W	NOP7	0.00980184	-0.213772	0.139155
YGR126W		0.246274				YGR104C	SRB5	0.109135	0.372095	0.153327
YGR127W		1.28123	0.937609	0.223734		YGR105W	VMA21	-0.760963	-0.087406	0.0189963
YGR128C	UTP8	-0.316119	0.222784	-0.488504		YGR106C		-0.226055	-0.428226	-0.123288
YGR132C	PHB1	0.981033	0.741027	0.895945		YGR107W		-0.228239	-0.124461	0.0277638
YGR133W	PEX4	-1.01112	-0.154703	-3.22654		YGR108W	CLB1	0.0461615	0.15205	0.0736308
YGR134W	CAF130	-1.06254	0.0794893	-2.07963		YGR109C	CLB6	0.647812	0.587731	0.722034
YGR135W	PRE9	-0.184492	0.029875	0.351993		YGR110W		0.63053	-0.270459	-0.17255
YGR136W	LSB1	-0.0443072	0.357476	-0.538419		YGR111W		1.93518	1.67034	1.62
YGR137W		-0.0948454	0.00960368	-0.657689		YGR112W	SHY1	2.49076	3.54802	3.4237
YGR138C	TPO2	0.455133	0.823149	-0.185805		YGR113W	DAM1	-0.408979	0.461847	0.60524
YGR140W	CBF2	-0.131336	0.00326324	-0.855831		YGR114C		-0.924148	-0.0124214	0.407919
YGR141W	VPS62	-0.459977	-1.67601	-0.281296		YGR115C		-0.289435	0.0342186	0.378574
YGR142W	BTN2	-0.937564	-0.100611	0.373201		YGR117C		0.0975529	-0.8467	-0.174694
YGR147C	NAT2	0.52764	0.566915	0.634628		YGR118W	RPS23A	-0.0890952	-0.506841	0.0578428
YGR148C	RPL24B	-0.310282	-0.296805	-0.462023		YGR119C	NUP57	0.14077	0.332693	0.239944
YGR149W		-0.181036	0.17938	-0.0924237		YGR120C	COG2	0.0992992	-0.416541	0.102241
YGR150C		-0.418301	0.388604	-0.418733		YGR121C	MEP1	0.356372	-0.171612	0.204199
YGR151C		-0.334463	-0.208829	0.334129		YGR122W		0.954613	0.770049	0.715672
YGR152C	RSR1	0.0855241	-0.47708	0.081561		YGR123C	PPT1	-0.15309	-0.197013	0.359167
YGR154C		0.315464	0.297859	0.463653		YGR124W	ASN2	0.406003	-0.0340066	-0.27603
YGR155W	CYS4	-1.21851	-0.127478	-0.694165		YGR126W		-0.27067	1.39378	0.569002
YGR156W	PTI1	-0.523021	-0.577083	-0.0563468		YGR127W		0.147729	0.718743	-0.945469
YGR158C	MTR3	-0.004332	-0.040513	0.386375		YGR128C	UTP8	-0.633137	-0.0524752	-0.0810336
YGR159C	NSR1	-0.311327	0.084178	-0.550962		YGR132C	PHB1	0.458125	0.417008	0.500423
YGR160W		-0.263207	-0.0240985	0.252208		YGR133W	PEX4	-0.0915882	0.730259	-1.07925
YGR161C	RTS3	-0.237519	0.248734	0.233854		YGR134W	CAF130	-0.814933	0.36917	-0.622193
YGR161W-C		0.02345	0.377258	0.677571		YGR135W	PRE9	-0.371386	-0.106235	-0.210405
YGR163W	GTR2	0.606911	0.0371546	0.959728		YGR136W	LSB1	0.29406	0.0140276	-0.0721114
YGR164W		-0.225185	-0.00807018	0.70204		YGR137W		-0.437591	0.00925867	-0.321827
YGR165W	MRPS35	0.577832	0.522103	1.04603		YGR138C	TPO2	-0.188907	0.344315	0.709654
YGR166W	KRE11	-0.312143	-0.259131	-0.699072		YGR140W	CBF2	-0.382664	0.149363	-0.57874
YGR167W	CLC1	0.184611	0.0117921	0.0334756		YGR141W	VPS62	0.392569	0.69106	-0.0178038
YGR168C		0.603119	0.421355	0.401518		YGR142W	BTN2	-0.24291	-0.184192	-0.482387
YGR169C	PUS6	0.501155	0.235596	0.236131		YGR147C	NAT2	0.693287	0.389211	0.5636
YGR169C-A		-0.211574	-0.544169	0.0660363		YGR148C	RPL24B	-0.205973	-0.612565	-0.156104
YGR170W	PSD2	0.539032	0.10359	0.689962		YGR149W		0.124126	-0.0190211	-0.306604
YGR171C	MSM1	-0.0951418	-0.0687427	-0.483422		YGR150C		-1.13934	-0.118938	-0.311755
YGR172C	YIP1	0.133482	0.0899376	-0.361938		YGR151C		-0.655342	0.0145512	0.0269574
YGR175C	ERG1	-0.0787212	-0.331166	-0.35602		YGR152C	RSR1	-0.214361	-0.15937	0.216175
YGR176W		-0.170851	0.167965	-0.791445		YGR154C		0.414767	0.0748609	0.102336
YGR178C	PBP1					YGR155W	CYS4	-0.950231	-0.818226	-0.0901612
YGR179C	OKP1	1.37789	0.74428	0.831388		YGR156W	PTI1	-0.0509129	0.102588	-0.170729
YGR180C	RNR4	0.386861	0.733004	-0.438547		YGR158C	MTR3	0.0903826	0.123832	-0.0799081
YGR181W	TIM13	-0.28033	-0.157034	-0.510605		YGR159C	NSR1	-0.0534972	-0.253688	-0.0559947
YGR182C		-0.277668	0.255567	-0.308458		YGR160W		-0.116224	0.353166	0.591719
YGR183C	QCR9	0.344816	0.748669	-0.75126		YGR161C	RTS3	-0.155637	0.348487	0.244033
YGR185C	TYS1	-0.0884571	-0.085253	0.0203593		YGR161W-C		-0.0895441	-0.511242	-0.221325
YGR187C	HGH1	-0.134037	-0.0277294	0.122823		YGR163W	GTR2	0.398224	-0.0512991	0.0184354
YGR188C	BUB1	0.030831	-0.305429	-0.550169		YGR164W		-0.419106	0.765559	0.604951
YGR189C	CRH1	-0.452078	-0.215471	-0.329156		YGR165W	MRPS35	0.625714	0.301462	0.53387
YGR190C		-0.245714	0.116778	-1.15949		YGR166W	KRE11	-0.127117	-0.248618	-0.0411188
YGR191W	HIP1	-0.220982	0.0433907	-0.679699		YGR167W	CLC1	-0.0388302	-0.237545	-0.552245
YGR192C	TDH3	0.166044	-0.0794289	-0.313474		YGR168C		-0.0453665	0.518156	-0.00493359
YGR193C	PDX1	-0.231657	0.00113477	-0.418607		YGR169C	PUS6	0.72624	0.22926	0.366145
YGR194C	XKS1	0.360777	-0.248258	-0.345498		YGR169C-A		-0.0936355	-0.625258	-0.524282
YGR195W	SKI6	-0.204536	-0.118655	0.0209609		YGR170W	PSD2	0.23031	0.378648	0.0686469
YGR197C	SNG1	1.02258	0.275163	0.78669		YGR171C	MSM1	-0.203482	-0.439855	0.0668812
YGR200C	ELP2		0.54538			YGR172C	YIP1	-0.155509	0.150014	-0.195648
YGR202C	PCT1	-0.464791	-0.274364	-0.600015		YGR175C	ERG1	0.10563	-0.516702	-0.383764
YGR203W	HUR1	-0.183443	0.124104	-0.866617		YGR176W		-0.111291	0.260518	-0.621798
YGR204W	ADE3	0.190342	0.00225092	0.0838019		YGR177C	ATF2	-0.659308	1.00674
YGR205W		0.193078	0.31102	0.339285		YGR178C	PBP1			-0.842618
YGR206W		-0.184106	-0.25575	0.045095		YGR179C	OKP1	0.702362	0.231732	-0.517724
YGR207C	ETF-BETA	0.260354	0.0373218	0.31881		YGR180C	RNR4	1.27055	0.159263	0.493337
YGR208W	SER2	-0.24353	0.17715	0.384284		YGR181W	TIM13	-0.597124	-0.150654	0.12865
YGR209C	TRX2	0.69306	-0.00573863	0.84995		YGR182C		-0.644049	0.0752001	0.0285074
YGR210C		-0.0522545	-0.0923147	-0.132619		YGR183C	QCR9	-0.306856	0.284996	-0.185086
YGR211W	ZPR1	-0.12864	-0.0718669	-0.552396		YGR185C	TYS1	0.0131509	-0.0814136	0.0362561
YGR212W		-0.210316	-0.0624125	-0.598629		YGR187C	HGH1	0.238184	-0.199583	0.287609
YGR213C	RTA1	0.878291	0.502298	0.185227		YGR188C	BUB1	-0.0712042	0.0165547	-0.399305
YGR214W	RPS0A	0.297947	0.723621	0.438535		YGR189C	CRH1	0.0909792	0.310064	0.418281
YGR215W	RSM27	0.237205	-0.047103	0.700492		YGR190C		-0.498586	0.0130718	-0.521706
YGR216C	GPI1	-0.276939	0.0145569	-0.609245		YGR191W	HIP1	-0.336167	-0.417479	-0.173424
YGR218W	CRM1	-0.235056	-0.127626	-0.0453673		YGR192C	TDH3	0.476831	-0.0262459	0.052579
YGR221C	TOS2	-0.221063	0.261947	0.0469608		YGR193C	PDX1	0.296591	0.0462831	0.0301301
YGR223C		-0.236943	0.0411193	-0.589338		YGR194C	XKS1	-0.230891	-0.227051	-0.644186
YGR224W	AZR1	-0.285004	-0.0489443	-0.427376		YGR195W	SKI6	-0.0401401	-0.201846	0.0590377
YGR226C		0.256423	-0.0448316	0.6361		YGR197C	SNG1	0.78952	0.122197	-1.09466
YGR228W		-0.277674	-0.105698	-0.214351		YGR200C	ELP2	1.02781	-0.887219	-0.388213
YGR229C	SMI1	0.102775	-0.139336	-0.0877394		YGR202C	PCT1	-0.326403	-0.637145	-0.336637
YGR230W	BNS1	0.771961	0.416731	0.640814		YGR203W	HUR1	-0.583365	0.251787	-0.540728
YGR232W	NAS6	0.0435678	-0.144204	0.231597		YGR204W	ADE3	0.548435	0.136967	0.0618307
YGR233C	PHO81	0.174127	0.139697	0.357152		YGR205W		-0.218333	0.482902	0.421201
YGR234W	YHB1	0.437181	0.515045	-0.469639		YGR206W		-0.558154	-0.108966	-0.199082
YGR235C		0.278579	0.212256	0.349048		YGR207C	ETF-BETA	-0.166614	-0.20101	-0.0970821
YGR236C	SPG1	0.112916	0.336171	0.245042		YGR208W	SER2	-1.11123	0.0939513	-0.5771
YGR239C	PEX21	0.214335	0.16652	0.121658		YGR209C	TRX2	-0.319301	-0.489906	0.0105418
YGR240C	PFK1	-0.849067	0.877787	-2.32349		YGR210C		0.0806243	-0.295031	0.000608705
YGR241C	YAP1802	-0.77749	-1.55852	-3.24225		YGR211W	ZPR1	0.270306	-0.42524	-0.273641
YGR242W		-1.75182	-1.57961	-0.587035		YGR212W		0.460783	-0.108972	0.149469
YGR244C	LSC2	0.0606421	0.0651596	-0.0467923		YGR213C	RTA1	0.843507	0.849473	0.458674
YGR246C	BRF1	-0.336796	-1.00949	0.465541		YGR214W	RPS0A	0.861888	0.392922	0.736045
YGR247W	CPD1	-0.0120922	-0.46196			YGR215W	RSM27	-0.53661	0.0929269	0.0835643
YGR248W	SOL4	0.55479	0.396071	-0.00163471		YGR216C	GPI1	-0.112261	-0.292604	-0.140975
YGR249W	MGA1	-0.497959	0.106387	-1.18688		YGR218W	CRM1	-0.225002	-0.403556	-0.344062
YGR251W		-0.23411	-0.147813	-0.223311		YGR221C	TOS2	-0.578247	0.12045	-0.312758
YGR252W	GCN5	0.224211	0.326295	0.372643		YGR223C		0.444915	-0.219783	-0.127653
YGR253C	PUP2	0.134465	-0.109515	0.387973		YGR224W	AZR1	-0.0118929	-0.150425	0.0782892
YGR254W	ENO1	-0.869639	-0.108673	-1.38295		YGR226C		-0.121405	0.351405	-0.0538141
YGR255C	COQ6	-0.36204	-0.0871516	-0.598466		YGR228W		-0.117049	-0.0767703	0.0164578
YGR256W	GND2	-0.0641159	-0.0908379	0.086496		YGR229C	SMI1	-0.313512	-0.275679	-0.417984
YGR257C		0.565082	0.574789	0.684377		YGR230W	BNS1	-0.742392	0.490221	-0.270236
YGR258C	RAD2	-0.314327	0.204228	-0.206977		YGR232W	NAS6	-0.224476	-0.325716	0.127032
YGR259C		2.3305	-2.96059	1.01995		YGR233C	PHO81	0.169735	0.380996	0.411871
YGR260W	TNA1	0.655579	0.395278	0.0981892		YGR234W	YHB1	0.127529	0.039686	-0.313436
YGR262C	BUD32	-0.180143	0.0923122	-0.00562356		YGR235C		-0.462002	-0.391633	-0.140932
YGR263C		-0.533073	-0.172737	-0.562129		YGR236C	SPG1	0.726545	0.822395	0.787964
YGR264C	MES1	-0.721929		-3.46289		YGR239C	PEX21	0.0810352	-0.221151	0.339306
YGR265W		-0.524782	-0.276334	0.0230567		YGR240C	PFK1	1.56984	1.20683	1.2659
YGR267C	FOL2	-0.386642	-0.223785	-0.470982		YGR244C	LSC2	0.150971	0.0517428	0.186736
YGR268C		0.461606	0.721122	0.238273		YGR245C	SDA1		1.7451	-0.683935
YGR269W		-0.23752	-0.798181	0.125757		YGR246C	BRF1	1.31861	0.876512	-1.04168
YGR272C		-0.823777	0.193157	-0.106678		YGR247W	CPD1	-0.291344	-1.0822
YGR273C		0.761618	1.57989	-0.49785		YGR248W	SOL4	-0.721615	-0.141239	-0.443897
YGR274C	TAF1	-0.442524	0.00724726	-0.0219383		YGR249W	MGA1	0.559651	-0.24544	-0.113857
YGR276C	RNH70	-0.376732	-0.668705	-0.549351		YGR251W		-0.0853109	0.248206	0.110461
YGR277C		-0.0575331	-0.343844	-0.0387547		YGR252W	GCN5	-0.0212189	0.268781	0.333176
YGR278W	CWC22	0.133672	0.435216	0.0674812		YGR253C	PUP2	0.146964	0.125412	-0.0321645
YGR279C	SCW4	0.611771	0.599428	0.260511		YGR254W	ENO1	0.753679	-0.514517	0.0137525
YGR280C	PXR1	-0.562041	-0.148011	-0.480119		YGR255C	COQ6	0.292444	-0.316818	0.0690706
YGR281W	YOR1	1.31319	0.834118	-0.234392		YGR256W	GND2	0.872127	-0.321242	0.311106
YGR282C	BGL2	-0.654675	0.159972	-1.5106		YGR257C		0.691592	0.595644	0.62487
YGR283C		-0.404824	-0.185367	-0.180107		YGR258C	RAD2	-0.0677198	0.115959	0.394752
YGR284C	ERV29	-0.215025	-0.0761853	0.0563405		YGR259C		0.457092	0.0829879	-0.0458672
YGR285C	ZUO1	-0.457892	-0.252517	-0.466913		YGR260W	TNA1	-0.62176	-0.634282	-0.894337
YGR286C	BIO2	0.141547	0.0670583	-0.0868886		YGR262C	BUD32	-0.200305	0.0198747	-0.270691
YGR288W	MAL13	-0.4154	0.949658	-1.2393		YGR263C		0.309839	-0.120484	-0.0252591
YGR290W		1.11001	0.524146	-1.31832		YGR265W		0.664306	1.023	0.903044
YGR292W	MAL12	0.10093	-0.959009	0.133442		YGR266W			-0.873072
YGR293C		1.24481	1.33349	1.8189		YGR267C	FOL2	-0.208996	-0.238605	-0.264767
YGR294W		-0.227293	-0.276879	0.132085		YGR268C		0.0194494	0.141063	0.0754072
YHL046C		0.0495326	-0.117854	0.333766		YGR269W		0.537188	-0.158364	-1.55063
YHL040C	ARN1	0.516269	0.311965	-0.0649531		YGR270W	YTA7	1.04841	-0.292683
YHL039W		-0.716566	-0.407818	-0.0821421		YGR272C		-0.12958	-0.414087	0.194468
YHL036W	MUP3	0.209983	-0.0258185	0.721284		YGR273C		0.82488	1.31799	1.58775
YHL035C	VMR1	1.59343	0.932697	1.34695		YGR274C	TAF1	0.0569963	-0.0937864	0.140253
YHL034C	SBP1	-0.435121	0.540119	-1.10409		YGR276C	RNH70	-0.349544	-0.309283	-0.30635
YHL033C	RPL4A	-0.653271	0.187846	-0.56826		YGR277C		-0.611269	-0.367842	-0.23114
YHL032C	GUT1	0.524667	-0.219903	0.675845		YGR278W	CWC22	-1.13504	0.0969994	-0.358625
YHL031C	GOS1	-0.239629	-0.381848	-0.351136		YGR279C	SCW4	0.977919	0.325642	0.521395
YHL029C		-0.238225	-0.08613	-0.752512		YGR280C	PXR1	-0.0600523	-0.230094	0.471683
YHL028W	WSC4	2.17451	1.00927	0.348983		YGR281W	YOR1	-0.00295371	-0.0752954	-0.709964
YHL027W	RIM101	0.696669	0.403712	-1.34709		YGR282C	BGL2	0.562765	0.467649	-0.0178567
YHL026C		1.12919	0.0747355	0.524765		YGR283C		0.479883	0.181077	0.478377
YHL025W	SNF6	1.05325	0.360008	-0.00165095		YGR284C	ERV29	0.100277	0.30785	0.342811
YHL023C	RMD11	0.0252543	-0.0490013	0.286415		YGR285C	ZUO1	0.714289	-0.304848	0.204913
YHL021C		-0.0740685	0.184857	-0.157028		YGR286C	BIO2	0.580656	0.09097	0.107755
YHL020C	OPI1	0.4747	0.0599502	1.05245		YGR287C
YHL019C	APM2	0.443891	-2.45755	-1.99743		YGR288W	MAL13	0.438614	1.35199	1.03889
YHL018W		-1.09532	-0.0938909	0.0168258		YGR289C	MAL11
YHL017W		-1.26245	0.362893	0.167683		YGR290W		-0.449698	-1.24326	-0.508157
YHL015W	RPS20	-0.60466	-0.0293533	-1.68229		YGR292W	MAL12	-0.304002	0.0843651	-0.662492
YHL014C	YLF2	0.226647	0.591	-0.22133		YGR293C		0.735147	0.278617	0.16547
YHL012W		0.256639	0.0385326	-0.288585		YGR294W		0.1741	-0.0293501	0.305555
YHL011C	PRS3	-0.192479	0.217136	0.297218		YHL046C		0.236079	0.239477	-0.0222432
YHL010C		-0.309377	0.214294	-0.50004		YHL040C	ARN1	-0.168899	-3.73157	-1.05548
YHL009C	YAP3	1.22692	1.07168	0.251032		YHL039W		1.26466	-0.133939	0.857039
YHL008C		0.261349	-0.414888	0.0726565		YHL036W	MUP3	0.314725	-0.123622	0.261395
YHL007C	STE20	0.178755	-0.328894	0.317158		YHL035C	VMR1	0.458438	-0.116691	-0.0683319
YHL004W	MRP4	0.908418	0.449275	0.161297		YHL034C	SBP1	1.11096	0.300686	0.249731
YHL003C	LAG1	-0.21399	-0.0271336	-0.486586		YHL033C	RPL4A	0.628254	0.0567619	0.502003
YHL002W	HSE1	-0.0771466	-0.0312222	-0.239307		YHL032C	GUT1	0.890464	0.00323924	-0.111473
YHL001W	RPL14B	0.119297	0.170063	0.569726		YHL031C	GOS1	0.590335	-0.216133	0.147257
YHR001W	OSH7	0.108724	0.115207	-0.158897		YHL029C		0.245708	-0.335248	-0.0667663
YHR002W	LEU5	0.628679	0.960204	0.525762		YHL028W	WSC4	0.490316	-0.569679	-0.612975
YHR003C		-0.104243	-0.115626	0.258223		YHL027W	RIM101	2.05357	-0.764458	0.491788
YHR004C	NEM1	-0.37934	0.0499528	-0.849712		YHL026C		1.33851	-0.185476	0.708094
YHR005C	GPA1	1.6076	0.0761564	-0.0906631		YHL025W	SNF6	1.64722	0.466279	0.884447
YHR006W	STP2	-1.08999	-0.0206522	-0.650304		YHL023C	RMD11	0.657618	0.296258	0.338211
YHR007C	ERG11	-0.0721766	-0.342164	-0.267135		YHL021C		0.619834	0.0712048	0.0118693
YHR008C	SOD2	0.466648	0.354812	-0.338281		YHL020C	OPI1	0.87664	-0.0262435	1.17728
YHR009C		0.41458	0.137603	0.21391		YHL019C	APM2	-0.732881	-1.8433	-0.502196
YHR010W	RPL27A	0.293633	0.212579	0.798123		YHL018W		1.62389	1.09285	1.50046
YHR011W	DIA4	0.29252	-0.0704745	0.298681		YHL017W		0.392094	1.28053	1.63918
YHR012W	VPS29	0.558362	0.382742	0.579902		YHL015W	RPS20	0.351027	-0.509164	-0.166666
YHR013C	ARD1	-0.124581	-0.202736	0.0816589		YHL014C	YLF2	0.946759	0.134512	0.073669
YHR015W	MIP6	-1.48937	-0.683158	-0.375251		YHL012W		1.00994	-0.414752	0.367203
YHR016C	YSC84	0.664186	0.333921	-0.190047		YHL011C	PRS3	1.44066	0.7007	0.775891
YHR017W	YSC83	0.331961	-0.185545	0.12169		YHL010C		0.435218	-0.471037	0.0706581
YHR018C	ARG4	0.132479	-0.47269	0.0138572		YHL009C	YAP3	1.20268	0.0724477	0.243863
YHR019C	DED81	-0.174559	-0.149807	-0.215867		YHL008C		1.14475	1.11987	0.697471
YHR020W		-0.846769	-0.413167	-0.509719		YHL007C	STE20	1.21178	-0.254361	0.510754
YHR021C	RPS27B	-0.652271	-0.346785	-0.087284		YHL004W	MRP4	0.813261	0.0323923	0.342674
YHR022C		-0.112432	-0.00849534	-0.633617		YHL003C	LAG1	0.553118	-0.117645	-0.0255966
YHR024C	MAS2	-0.539055	-0.268878	-0.723349		YHL002W	HSE1	0.846731	-0.0923849	0.309466
YHR025W	THR1	-0.165258	0.806701	0.585731		YHL001W	RPL14B	0.668655	0.216816	0.864207
YHR026W	PPA1	-0.179422	-0.00514382	-0.665865		YHR001W	OSH7	0.681062	-0.110254	0.350948
YHR027C	RPN1	1.66955	0.673185	0.160073		YHR002W	LEU5	1.6682	0.514864	1.20529
YHR029C		0.70048	0.913982	0.177219		YHR003C		0.778968	0.103452	0.657189
YHR030C	SLT2	-0.646127	-0.197509	-0.483553		YHR004C	NEM1	0.871207	-0.0851638	0.100704
YHR033W		0.462388	0.140954	0.157899		YHR005C	GPA1	0.199275	-1.88203	-1.33724
YHR034C		0.278006	0.493673	0.651416		YHR006W	STP2	-0.488812	0.489901	0.1565
YHR035W		0.314138	-0.675909	-2.42364		YHR007C	ERG11	0.868136	0.376004	0.224566
YHR036W		0.352665	-0.291697	0.0347672		YHR008C	SOD2	0.764483	-0.0332328	0.415219
YHR039C-A	VMA10	-0.0479383	0.106738	0.0308837		YHR009C		0.762112	0.417294	0.509542
YHR040W	BCD1	0.217938	-0.265345	0.815061		YHR010W	RPL27A	0.446736	-0.0132095	0.823559
YHR041C	SRB2	-0.0870751	-0.044856	-0.0880022		YHR011W	DIA4	0.44937	-0.0142564	0.446547
YHR042W	NCP1	0.617001	-0.209161	0.783964		YHR012W	VPS29	0.754808	0.696303	0.487437
YHR043C	DOG2	-0.0660924	-0.0133298	0.236153		YHR013C	ARD1	0.611503	-0.31231	0.242196
YHR044C	DOG1	-0.415109	-0.0539524	0.0766729		YHR015W	MIP6	-0.148848	-0.038624	-0.141139
YHR045W		-0.715998	0.125379	-0.950592		YHR016C	YSC84	0.468762	0.16005	-0.949517
YHR046C	INM1	0.438162	0.189329	-0.035014		YHR017W	YSC83	1.08876	0.334081	0.694851
YHR048W		0.380363	0.638348	0.144527		YHR018C	ARG4	0.153652	-0.354663	-0.291126
YHR049W	FSH1	0.100447	-0.0241391	0.25257		YHR019C	DED81	0.962259	-0.151113	0.36182
YHR050W	SMF2	0.245698	-0.233556	0.738274		YHR020W		0.626737	-0.453722	0.191294
YHR052W	CIC1	-1.46919	-0.247358	-1.57018		YHR021C	RPS27B	0.232655	-0.504737	0.824174
YHR053C	CUP1-1	-0.465291	0.329076	-1.35008		YHR022C		0.357884	-0.227045	-0.158259
YHR054C		0.0522485	0.0887028	-0.410289		YHR024C	MAS2	0.378549	-0.439892	0.204549
YHR056C	RSC30	-0.889872	-0.480226	-0.131226		YHR025W	THR1	1.22571	0.495741	1.35216
YHR057C	CPR2	-0.0452547	-0.250272	0.633405		YHR026W	PPA1	1.06864	0.0320965	0.103731
YHR058C	MED6	0.396591	0.448323	0.958035		YHR027C	RPN1	1.97403	0.110714	-0.0527859
YHR059W	FYV4	-0.145592	-0.173519	0.0400023		YHR029C		0.689095	0.922638	0.78605
YHR061C	GIC1	0.754005	0.27955	0.940293		YHR030C	SLT2	0.694357	-0.369	0.375062
YHR062C	RPP1	0.336343	0.0732291	0.790949		YHR033W		1.00338	0.00422096	0.228926
YHR063C	PAN5	0.0736943	-0.0104346	0.104543		YHR034C		1.50718	0.662417	0.997703
YHR064C	SSZ1	0.466342	0.0257713	-0.152178		YHR035W		1.31766	0.755802	0.871067
YHR065C	RRP3	0.143376	-0.111265	0.616421		YHR036W		1.08338	-0.22821	0.799423
YHR066W	SSF1	-0.0640775	-0.25088	-0.29593		YHR039C-A	VMA10	0.265778	-0.0850905	-0.123071
YHR067W		0.232927	0.45206	0.360781		YHR040W	BCD1	0.694187	-0.371402	0.843162
YHR068W	DYS1	-0.0507642	-0.307085	0.0469373		YHR041C	SRB2	0.106506	-0.282447	0.168735
YHR069C	RRP4	0.199447	0.308465	0.188666		YHR042W	NCP1	0.677892	0.0799707	0.131126
YHR070W	TRM5	2.24003	0.996273	0.0213598		YHR043C	DOG2	0.951366	-0.198719	0.37285
YHR071W	PCL5	-0.864038	-0.300335	-0.122552		YHR044C	DOG1	1.47405	0.188774	0.830962
YHR072W	ERG7	-0.484804	-0.275426	-1.32963		YHR045W		1.3774	0.389426	0.575113
YHR072W-A	NOP10	-1.4605	-0.267824	-2.01377		YHR046C	INM1	1.02885	0.229639	0.605084
YHR073W	OSH3	0.305897	-0.0675157	0.118225		YHR048W		0.744061	-0.0463696	0.259329
YHR076W	PTC7	1.10613	0.671709	1.12387		YHR049W	FSH1	0.764041	-0.648737	0.252823
YHR077C	NMD2	-0.426809	0.0371043	-0.819845		YHR050W	SMF2	0.823807	0.370047	0.462569
YHR078W		-0.767878	-0.281654	-0.112399		YHR052W	CIC1	1.54469	-0.398214	0.617884
YHR079C	IRE1	0.510469	-0.0746061	-0.0589548		YHR053C	CUP1-1	0.648489	-0.46637	0.258697
YHR081W	LRP1	-0.559746	-0.106725	-0.258948		YHR054C		0.828426	0.0519505	0.438419
YHR083W		0.215872	0.129207	0.419967		YHR056C	RSC30	0.689525	-0.441871	0.340546
YHR085W	IPI1	-0.331268	0.0038739	-0.460473		YHR057C	CPR2	1.02348	-0.275641	0.87545
YHR086W	NAM8	0.787916	1.67851	1.61012		YHR058C	MED6	1.15873	0.265322	0.322199
YHR087W	RTC3	1.55297	0.853163	-0.878895		YHR059W	FYV4	-0.0126582	-0.482285	0.171184
YHR090C	YNG2	0.222397	0.0961529	0.656786		YHR061C	GIC1	1.5547	1.28042	0.926574
YHR091C	MSR1	0.253898	-0.228783	-0.502956		YHR062C	RPP1	1.64339	0.328249	1.01906
YHR094C	HXT1	-0.244679	0.170465	-1.34334		YHR063C	PAN5	1.10753	0.338475	0.909568
YHR095W		0.484847	1.54101	-1.48884		YHR064C	SSZ1	1.58716	-0.171407	-0.201433
YHR096C	HXT5	0.520152	0.963382	-2.14943		YHR065C	RRP3	1.1626	0.115498	0.655214
YHR097C		0.940156	0.501181	0.992982		YHR066W	SSF1	1.04615	-0.406461	0.324154
YHR100C		-0.488139	-0.484547	-0.49305		YHR067W		1.58247	0.743695	1.26194
YHR101C	BIG1	0.0905584	-0.179776	-0.400737		YHR068W	DYS1	1.2018	-0.284035	0.896389
YHR102W	KIC1	0.316318	0.0675085	-0.506879		YHR069C	RRP4	0.874744	0.105833	0.508589
YHR103W	SBE22	-0.765948	-0.011637	-0.546569		YHR070W	TRM5	3.16796	1.26882	1.96276
YHR104W	GRE3	0.976854	0.51268	-0.508654		YHR071W	PCL5	1.11608	-0.479935	0.753717
YHR105W	YPT35	-1.74665	0.311077	0.761358		YHR072W	ERG7	1.10386	-0.391754	0.456225
YHR106W	TRR2	0.619368	1.04054	0.561979		YHR072W-A	NOP10	1.06696	-0.204137	0.370721
YHR107C	CDC12	0.333035	-0.156259	0.453553		YHR073W	OSH3	0.93708	-0.485955	0.110406
YHR108W	GGA2	0.436484	0.1661	-0.131152		YHR076W	PTC7	1.35258	0.53718	0.882617
YHR109W	CTM1	0.276107	0.69337	-0.127307		YHR077C	NMD2	1.00448	0.0499466	0.580314
YHR111W		-0.510754	-0.182627	-0.317805		YHR078W		3.2064	1.745	1.33023
YHR112C		-0.0627586	0.569988	0.378005		YHR079C	IRE1	1.27146	0.0731434	0.650179
YHR113W		0.0340011	-0.420902	-0.562898		YHR081W	LRP1	1.2809	0.125492	0.963694
YHR114W	BZZ1	-0.115939	0.154683	0.129714		YHR083W		0.782917	0.460511	0.595479
YHR115C		-0.595738	-0.160424	-0.445953		YHR084W	STE12	2.07735	-3.94103	-0.0220437
YHR117W	TOM71	0.286836	-0.385985	0.366071		YHR085W	IPI1	-0.0911661	-0.342605	0.0798433
YHR118C	ORC6	-0.637937	1.31795	0.557872		YHR086W	NAM8	-1.27732	0.392195	0.924801
YHR120W	MSH1	1.34615	0.78168			YHR087W	RTC3	-0.450492	-1.4533	-0.721679
YHR121W		-0.464638	-0.38529	-0.163204		YHR090C	YNG2	2.04079	0.797676	1.76557
YHR122W		-0.000823437	-0.00479056	0.0580237		YHR091C	MSR1	1.5729	-0.647167	-0.915529
YHR123W	EPT1	-0.308655	-0.00188583	-0.542351		YHR094C	HXT1	0.211864	-0.622674	-0.14569
YHR126C		-0.23177	-0.0582498	-0.498886		YHR095W				-1.21787
YHR127W	HSN1	0.232472	-0.296577	0.211761		YHR096C	HXT5	1.08299	0.160217	0.847423
YHR128W	FUR1	-0.513075	-0.0593006	-0.291157		YHR097C		1.40083	-0.281762	0.996081
YHR129C	ARP1	0.562292	0.724748	0.92886		YHR100C		1.03428	-0.114683	0.57911
YHR130C		-0.27499	0.0264156	-0.0019869		YHR101C	BIG1	0.516692	-0.171633	0.262914
YHR132C	ECM14	0.145381	1.64825	1.54115		YHR102W	KIC1	0.968875	0.123425	0.691248
YHR133C		0.032898	-0.0452872	-0.774952		YHR103W	SBE22	-0.189785	-1.99634	0.187619
YHR134W	WSS1	0.167355	0.390554	0.659883		YHR104W	GRE3	0.784893	-0.316701	-0.684698
YHR135C	YCK1	-0.11776	0.118818	0.0943174		YHR105W	YPT35	4.81006	3.34926	2.83691
YHR139C-A		0.706966	-0.597926	-0.154802		YHR106W	TRR2	1.47021	0.688018	1.10101
YHR140W		-0.633288	-0.142615	-0.402932		YHR107C	CDC12	0.861368	-0.0824222	0.511628
YHR143W	DSE2	0.423979	0.799226	-1.15125		YHR108W	GGA2	1.31295	-0.294292	-0.0245983
YHR143W-A	RPC10	-0.639862	0.601459	-2.82495		YHR109W	CTM1	1.07597	0.242989	0.48759
YHR144C	DCD1	0.0428795	0.150145	-0.120933		YHR111W		0.64152	-0.24367	0.547806
YHR145C		-0.325261	-0.659083	0.0309003		YHR112C		1.84723	0.85516	1.44676
YHR146W	CRP1	-0.414338	0.419421	0.237516		YHR113W		0.350856	-0.431525	0.188426
YHR147C	MRPL6	-0.0642467	-0.0459384	0.0709992		YHR114W	BZZ1	0.779466	-0.261433	-0.163493
YHR148W	IMP3	-0.395892	-0.254878	-0.994921		YHR115C		0.700065	0.0423201	0.343496
YHR149C		-1.26516	-1.06083	-1.45419		YHR117W	TOM71	1.34028	0.404209	0.835012
YHR150W	PEX28	-0.515664	-0.361076	-0.353034		YHR118C	ORC6	0.145087	0.941939	0.834395
YHR151C		-0.27593	0.0285486	-2.47552		YHR120W	MSH1	1.71501	0.418775	-1.50444
YHR154W	RTT107	0.399335	-0.200859	-0.974762		YHR121W		0.172049	-0.298319	-0.0680063
YHR155W	YSP1	-1.40017	-0.406193	-0.601311		YHR122W		0.409089	-0.294534	-0.110789
[truncated: 2,762 more rows]
