# Supplementary material
Source: HighWire-hosted journal article supplement (doi:10.1101/rna.078774.121)
Supplement: Supplemental_Table_S4.xlsx [file Supplemental_Table_S4.xlsx]

## Sheet: Figure 2A
ORF name	Log2 FC SR	Log2 FC HL
YFR026C	-0.256735	2.68215
YER180C	-0.7978	2.57464
YIR029W	-0.101876	2.46587
YJR155W	-0.63986	2.3979
YIL082W	-0.300637	2.38816
YJR021C	-0.66111	2.30699
YIL165C	-0.376153	2.30455
YOL014W	-0.421575	2.29556
YER066W	-0.287284	2.27622
YHR022C	-0.629101	2.27027
YOR304C-A	-0.798761	2.12473
YBL071W-A	-0.978573	2.05842
YJL116C	-0.153976	2.00521
YCR020C	-0.255813	1.99252
YAR050W	-0.597567	1.97046
YBR008C	-0.413102	1.95617
YGL193C	-0.57103	1.92104
YKR104W	-0.0864402	1.86312
YFR022W	-0.439834	1.86191
YGL251C	-0.283053	1.85744
YOL154W	-0.598175	1.8239
YLL056C	-0.325917	1.8202
YIR030W-A	-0.302215	1.81695
YDL115C	-0.602683	1.78103
YHR211W	-0.34357	1.75433
YOL164W	-0.249809	1.74282
YNR059W	-0.425967	1.69666
YDR185C	-0.548781	1.67373
YDL215C	-0.571425	1.63423
YBR298C	-0.412793	1.61688
YBR217W	-0.58786	1.61256
YIL173W	-0.443286	1.60321
YHR206W	-0.684636	1.60144
YIL176C	-0.322601	1.59085
YLR251W	-0.61431	1.58516
YGR169C-A	-0.905445	1.58006
YMR081C	-0.954284	1.57869
YMR080C	-2.90802	1.57706
YNL162W-A	-0.452886	1.57188
YLR377C	-0.401956	1.55467
YJR008W	-0.352402	1.55412
YER188W	-0.142984	1.54989
YOR178C	-0.4107	1.54841
YDL154W	-0.519542	1.53301
YOL161C	-0.643345	1.52566
YIL009C-A	-0.8148	1.50916
YCR020W-B	-0.374445	1.50661
YJL023C	-0.399712	1.50611
YMR090W	-0.418431	1.49564
YFL020C	-0.36055	1.49448
YER024W	-0.451123	1.47636
YNL095C	-0.521556	1.47247
YLR446W	-0.456839	1.46329
YNR002C	-0.562644	1.45025
YGR294W	-0.341093	1.4473
YKR105C	-0.496208	1.42137
YGL262W	0.79798	1.41237
YNR076W	-0.374455	1.41236
YCL011C	-0.809169	1.37106
YEL028W	-0.361765	1.37049
YBL005W	-0.425683	1.36687
YDL079C	-0.500424	1.35594
YCL014W	-0.680181	1.35467
YCL067C	-0.637524	1.34921
YFR020W	-0.237222	1.3418
YDR256C	-0.480032	1.33648
YMR316W	-0.273108	1.33076
YOL133W	-0.558085	1.32957
YER069W	-0.496062	1.32934
YJL064W	-0.530249	1.32667
YKL187C	-0.324856	1.32054
YJL223C	-0.194772	1.31242
YDR210W	-0.759436	1.3096
YHR096C	-0.260341	1.30732
YIR042C	0.0365969	1.30472
YDR501W	-0.376966	1.30003
YJR064W	-0.860804	1.29691
YJL024C	-0.355279	1.29079
YIL167W	-0.45617	1.28575
YJL126W	-0.200655	1.2806
YDR533C	-0.648125	1.28053
YML093W	-0.972435	1.27175
YEL049W	-0.308885	1.2674
YOR386W	-0.578856	1.2634
YMR180C	-0.399303	1.26172
YOR305W	-0.585567	1.25605
YEL077C	-1.07845	1.24219
YDR022C	-0.465773	1.22461
YMR114C	-0.526538	1.22305
YAL065C	-0.411368	1.22233
YCR107W	-0.56546	1.22101
YLL063C	-0.196341	1.21449
YHL050C	-1.11237	1.21402
YLR130C	-0.546663	1.21285
YML099W-A	-0.299427	1.20977
YCR039C	-0.649139	1.20752
YNL046W	-0.668922	1.20605
YNR065C	-0.789441	1.2028
YHL046C	-0.445086	1.19677
YEL072W	-0.418709	1.19487
YDL231C	-0.370564	1.18819
YIL120W	-0.621746	1.18795
YLL064C	-0.401918	1.1868
YHR210C	-0.29349	1.18373
YAL014C	-0.501663	1.15621
YGR121C	-0.610877	1.15515
YDR132C	-0.375424	1.15327
YMR169C	-0.275188	1.1521
YKL188C	-0.384697	1.14907
YHR209W	-0.328639	1.14782
YLR091W	-0.487173	1.14716
YCL002C	-0.724649	1.12586
YGL054C	-0.439791	1.12066
YCR014C	-0.594968	1.11934
YLR165C	-0.47642	1.11729
YML066C	-0.370872	1.1151
YPL198W	-1.50724	1.11111
YIL103W	-0.567028	1.10033
YPR149W	-1.91448	1.09991
YNL142W	-0.3537	1.09744
YPR121W	-0.481118	1.09685
YDR236C	-0.482263	1.09226
YLR030W	-0.597199	1.09148
YER115C	-0.631889	1.09107
YKR053C	-0.317137	1.09009
YBR301W	-0.490986	1.08256
YGR015C	-0.657692	1.08041
YIL116W	-0.383789	1.07864
YNL014W	-0.350377	1.07303
YKL033W	-0.44086	1.06984
YLR306W	-0.425554	1.0681
YCR104W	-0.391482	1.06111
YDR147W	-0.610735	1.05955
YFL058W	0.183424	1.0549
YPL149W	-0.383282	1.04939
YDR206W	-0.48766	1.04833
YHR204W	-1.52648	1.03948
YFL057C	-0.474825	1.02326
YAL002W	-0.539299	1.01653
YOL112W	-0.505527	1.00551
YCR007C	-0.452845	1.002
YPL175W	-1.43227	1.00137
YPL258C	-0.247829	1.00134
YJL216C	-0.420748	1.00133
YNL329C	-0.372084	0.996588
YNR056C	-0.325027	0.987002
YBR197C	-0.421636	0.978455
YPL064C	-0.317937	0.972821
YOR311C	-1.9588	0.971752
YGR074W	-0.602431	0.970277
YFL059W	-0.388479	0.964003
YOL156W	-0.302229	0.963876
YOR385W	-0.881575	0.957966
YBR291C	-0.276901	0.957056
YNL289W	-1.24947	0.941883
YML107C	-0.419009	0.936437
YOR365C	-0.638112	0.932576
YER186C	-0.460208	0.929508
YFL054C	-0.073147	0.926807
YFL026W	-1.24452	0.92233
YPL077C	-0.48394	0.920999
YBR186W	-0.557011	0.919578
YKL224C	-0.511127	0.917504
YKR091W	-0.221373	0.915319
YDR131C	-0.351805	0.905867
YPR114W	-0.702185	0.904192
YLR126C	-0.442746	0.90377
YPR167C	-0.428104	0.903387
YBR157C	-0.711931	0.901906
YNL257C	-0.842882	0.899826
YJR102C	-0.44729	0.898221
YBR043C	-0.402243	0.895363
YGL261C	-0.515358	0.887993
YIL136W	-1.30119	0.88104
YLR211C	-0.338553	0.880297
YEL025C	-0.425816	0.878993
YIL029C	-0.510605	0.877928
YCL056C	-0.387108	0.877529
YKR061W	-0.783763	0.875073
YLR263W	-0.566428	0.870169
YLR288C	-0.499063	0.868173
YMR253C	-0.636618	0.858621
YHR134W	-0.331533	0.857872
YGR032W	-0.513545	0.857166
YGL256W	-0.476912	0.849668
YDL055C	-0.179169	0.849479
YDR275W	-0.175118	0.839834
YCL004W	-0.374019	0.837759
YMR155W	-0.3696	0.836907
YOR120W	-0.470346	0.83654
YNL013C	-0.601082	0.831417
YER065C	-1.19984	0.825834
YDL165W	-0.506448	0.823457
YPR144C	-1.00834	0.821022
YMR290W-A	-0.703255	0.820306
YOR179C	-0.68035	0.813355
YKL199C	-0.601201	0.810605
YDR174W	-0.690078	0.80466
YOL165C	-0.288693	0.798603
YOR389W	-0.121521	0.797343
YGR007W	-0.408852	0.794172
YKL098W	-0.513138	0.78741
YGR251W	-0.670796	0.785498
YFL067W	-1.18152	0.783245
YKR022C	-0.359138	0.774514
YDR133C	-0.946581	0.772807
YCL075W	-1.17283	0.772423
YPR168W	-0.69528	0.772181
YNL279W	-0.528035	0.769389
YML116W	-0.393724	0.768968
YJR149W	-0.423299	0.768209
YER054C	-0.592704	0.767578
YBL060W	-0.354652	0.765172
YKL163W	-0.508656	0.75577
YOR206W	-1.07976	0.753793
YLR128W	-0.491913	0.749764
YLR097C	-0.52568	0.74967
YNR011C	-0.364856	0.745979
YDR391C	-0.536808	0.741927
YIR032C	0.419851	0.741373
YLR085C	-0.305007	0.740726
YBR141C	-0.394166	0.740508
YOR152C	-0.55402	0.739462
YER150W	-0.274991	0.737429
YMR040W	-0.285237	0.737293
YER103W	-0.269258	0.736414
YMR051C	-0.482384	0.730818
YLL005C	-0.496469	0.728547
YOL055C	-0.249468	0.726205
YML098W	-0.453763	0.721417
YJR124C	-0.599942	0.720278
YKL051W	-0.484463	0.71973
YMR028W	-0.287876	0.719161
YGL156W	-0.170628	0.718845
YIL024C	-0.258921	0.715302
YLR046C	-0.531337	0.715051
YDR380W	-0.839866	0.712838
YOR192C	-0.460459	0.711219
YFR014C	-1.11769	0.708913
YGR268C	-0.492788	0.702324
YOR071C	-0.522371	0.702163
YJL044C	-0.517793	0.696228
YGR292W	-0.182658	0.696178
YKL138C-A	-0.344028	0.690847
YDR073W	-0.662368	0.685081
YHR128W	-0.733635	0.682553
YMR271C	-0.317285	0.681999
YOR340C	-0.9421	0.679163
YMR037C	-1.01497	0.676194
YPL232W	-0.589017	0.671389
YGL096W	-0.718749	0.669344
YFR055W	-0.200812	0.667275
YGL255W	-0.69165	0.666384
YGR042W	-0.429022	0.663376
YAR020C	-0.423805	0.658878
YBL071C	-0.563867	0.655155
YJR091C	-0.557253	0.655144
YHR150W	-0.624815	0.655001
YJR028W	-0.335394	0.654908
YIL083C	-0.281621	0.654526
YLR010C	-0.3075	0.646996
YOR019W	-0.326783	0.638009
YGR091W	-1.52262	0.637402
YPR032W	-1.56288	0.636986
YGL110C	-1.20757	0.636377
YOR283W	-0.52185	0.6362
YBR071W	-0.458894	0.632835
YHR153C	-0.422817	0.629124
YLR284C	-0.428845	0.628972
YLR265C	-0.534658	0.627881
YLR137W	-0.452634	0.626363
YHL040C	-0.439247	0.62528
YML121W	-1.08597	0.624699
YML068W	-0.274313	0.619253
YML019W	-0.633936	0.619228
YLR457C	-0.471537	0.619004
YOL068C	-0.466111	0.618839
YHR077C	-0.760875	0.617813
YCR044C	-0.929385	0.616043
YOR013W	-0.640124	0.615682
YIL161W	-2.51128	0.612324
YPL276W	-0.893672	0.609121
YMR023C	-0.444073	0.607071
YLR171W	-0.173557	0.602442
YMR018W	-0.293457	0.597989
YIL084C	-0.499785	0.597664
YIL142W	-0.198545	0.597203
YJL065C	-0.421857	0.596148
YGL250W	-0.190667	0.595845
YMR110C	-0.469956	0.594248
YGL173C	-0.505402	0.593965
YPR070W	-0.707228	0.593481
YGR043C	-0.214864	0.591212
YLR271W	-0.498487	0.591096
YJR082C	-0.570087	0.590714
YPL189W	0.0828123	0.589089
YJR096W	-0.519459	0.583564
YFR030W	-0.0714395	0.583067
YCL016C	-0.237447	0.582153
YMR065W	-0.577723	0.580848
YDL155W	-0.59803	0.580809
YLR178C	-0.447216	0.580797
YOL113W	-1.14545	0.580465
YJR027W	-1.0639	0.58036
YKL201C	-1.0302	0.579395
YOL108C	-0.512598	0.579386
YGR153W	-0.485255	0.578413
YBR030W	-0.666902	0.578023
YOR041C	-0.522793	0.57682
YCL009C	-0.129097	0.574118
YNL012W	-0.281311	0.568757
YDR480W	-0.406381	0.567692
YMR185W	-0.842525	0.567058
YKR012C	-0.514907	0.563563
YER037W	-0.401105	0.562809
YMR001C	-1.79167	0.560022
YBR174C	-0.863262	0.559525
YKL026C	-0.518122	0.559491
YFL027C	-0.983304	0.55391
YPL165C	-0.605447	0.550852
YDR109C	-0.345142	0.549782
YCR025C	-0.297468	0.543603
YCR091W	-0.625564	0.542473
YOR130C	-0.314982	0.542339
YML082W	-0.674305	0.539808
YER092W	-0.392426	0.535891
YPR082C	-0.71945	0.535785
YDL043C	-1.0824	0.532992
YMR303C	-0.351719	0.528507
YKL040C	-0.495482	0.526475
YBR145W	-0.215554	0.525519
YIL003W	-0.437435	0.523965
YPR047W	-0.482846	0.521397
YNL038W	-0.331815	0.521216
YGR051C	-0.483137	0.520651
YGR133W	-0.243279	0.519942
YBR194W	-0.903061	0.515339
YLR092W	-0.364431	0.514187
YOR149C	-0.651684	0.513774
YJR010W	-0.310171	0.512683
YJR137C	-0.231848	0.510297
YDR361C	-0.500089	0.507494
YPL195W	-0.48908	0.507493
YCL025C	-0.743286	0.507138
YGR221C	-0.301432	0.506564
YDL197C	-0.484453	0.505996
YFL029C	-0.409399	0.504118
YOL152W	-0.846851	0.503144
YBR180W	-0.256385	0.503005
YGR213C	-0.177258	0.502321
YPR017C	-0.489746	0.500932
YOL098C	-1.55489	0.500855
YHR072W	-0.557457	0.499281
YGR210C	-0.553775	0.498394
YKL091C	-0.673768	0.497701
YPL014W	-1.35135	0.496219
YER028C	-0.231057	0.493641
YDR163W	-0.576059	0.492577
YOL059W	-0.479774	0.491349
YNR029C	-0.667118	0.491122
YML040W	-0.269038	0.489339
YIL079C	-0.430866	0.488402
YGL070C	-0.67705	0.485758
YPR190C	-1.14538	0.485732
YLL060C	-0.277378	0.485274
YGR110W	-0.583733	0.484881
YDR387C	-0.416336	0.483902
YJR039W	-0.224199	0.483862
YIL089W	-0.337712	0.482926
YBR012C	-0.143342	0.482078
YDL008W	-0.278493	0.48203
YMR035W	-0.560068	0.481793
YNL270C	-0.561924	0.481566
YDR268W	-0.50071	0.481438
YMR020W	-0.190978	0.476839
YEL005C	-0.429834	0.47564
YMR316C-B	-0.349144	0.47121
YHR143W-A	-0.769223	0.470819
YEL033W	-0.362837	0.466249
YGL057C	-0.383571	0.464142
YGL247W	-0.331974	0.464112
YBL088C	-0.252032	0.463782
YPL095C	-0.470249	0.462709
YLR274W	-1.52399	0.462661
YJR107W	-0.316686	0.46243
YBR077C	-0.647774	0.461307
YDR193W	-0.646168	0.461066
YDR209C	-0.554553	0.460997
YDL130W	-0.373429	0.458856
YGL205W	-0.462594	0.455189
YOL009C	-0.572106	0.454404
YBL020W	-0.41303	0.452879
YCR028C	-0.691977	0.452645
YIL013C	-0.67644	0.452513
YDR408C	-0.582791	0.450425
YIL019W	-0.840562	0.448616
YNL153C	-0.819537	0.448449
YKL001C	-0.169805	0.44781
YMR239C	-1.30333	0.446861
YOR210W	-1.04737	0.446211
YLR426W	-0.453388	0.445984
YLL038C	-0.54402	0.445628
YHR148W	-0.286676	0.441053
YJR003C	-0.463774	0.440822
YDR382W	-0.477281	0.435186
YDL085C-A	-0.660683	0.433159
YNL015W	-1.16502	0.432807
YPL002C	-0.255472	0.43268
YGL196W	-0.451357	0.432525
YDL109C	-0.816962	0.432196
YER015W	-0.0749505	0.432175
YJR077C	-0.595804	0.430639
YMR138W	-0.355004	0.430638
YGR024C	-0.394876	0.429354
YGL243W	-0.523929	0.428864
YPR169W	-0.538013	0.428058
YCR016W	-0.432799	0.427041
YNL094W	-0.415509	0.426591
YDR078C	0.47677	0.425108
YPL089C	-0.599035	0.423313
YNL032W	-0.549138	0.418084
YKR044W	-0.427195	0.417779
YMR161W	-0.429329	0.413249
YGR019W	-0.631073	0.411794
YNL179C	-0.415792	0.409997
YMR147W	-0.595029	0.406611
YBR278W	-0.338313	0.405876
YJL157C	-0.816001	0.402953
YDR108W	-0.379654	0.402917
YDR040C	-0.426263	0.402146
YFL012W	-0.508495	0.400606
YMR167W	-0.540462	0.400534
YNL159C	-0.319188	0.398702
YOL001W	-0.115515	0.398014
YBL107C	-0.37181	0.397829
YDR069C	-0.528293	0.397255
YCR059C	-0.437452	0.395393
YBR213W	-0.277632	0.393357
YPR099C	-0.511342	0.393293
YPL065W	-0.509031	0.391715
YDL247W	-0.271384	0.390201
YGR154C	-0.19884	0.388364
YER170W	-0.60087	0.387887
YHR182W	-0.719931	0.387629
YGR062C	-0.609174	0.383847
YGL039W	-0.655333	0.38308
YLR384C	-0.266273	0.380781
YPL110C	-0.30672	0.380136
YLR316C	-0.496106	0.37651
YLR242C	-0.374686	0.376255
YDL123W	-0.542607	0.372675
YLR266C	-0.668418	0.372543
YER187W-A	-1.80358	0.372523
YDR033W	-0.529746	0.371082
YOR005C	-0.258128	0.37106
YBL025W	-0.500115	0.370517
YPL244C	-0.386118	0.370472
YKL019W	-0.415849	0.37033
YDR437W	-0.521795	0.369796
YLR452C	-1.24462	0.368071
YGL117W	-0.44488	0.367719
YPR010C	-1.04227	0.364558
YML055W	-0.558506	0.362113
YOR392W	-0.668283	0.361256
YOR106W	-0.734257	0.361215
YKL057C	-1.09793	0.360836
YMR187C	-0.555175	0.359574
YHR140W	-0.475238	0.358661
YDR475C	-0.614024	0.358305
YGR127W	-0.774027	0.358107
YNL004W	-0.455485	0.357539
YDL093W	-0.396666	0.354347
YAL028W	-0.274447	0.353096
YHL016C	-0.023425	0.350694
YBR063C	-0.138816	0.350618
YDL110C	-0.599589	0.350027
YDR085C	-0.391185	0.348366
YOR049C	-0.494336	0.347479
YLR376C	-0.56101	0.346444
YCL066W	-0.563762	0.345776
YLR105C	-0.246107	0.344901
YHR024C	-0.842173	0.343409
YDR240C	-0.456997	0.342508
YDL187C	-0.202269	0.341122
YLL003W	-0.47277	0.341028
YPR154W	-0.599399	0.338749
YOR383C	-0.786241	0.338218
YJR066W	-0.449009	0.334823
YGL103W	-0.872377	0.334755
YMR193C-A	-0.580653	0.333096
YAR028W	-0.479609	0.333007
YJL088W	-0.662498	0.331779
YOL118C	-0.187365	0.331244
YBL067C	-0.33108	0.330514
YML046W	-0.665325	0.329763
YGR199W	-0.550698	0.32955
YHR207C	-0.823768	0.328858
YOR315W	-1.41954	0.326943
YMR294W	-0.582878	0.326585
YHR180W	-0.205011	0.325104
YNL335W	-0.221733	0.323532
YNL260C	-0.341982	0.323285
YPL180W	-0.698355	0.323192
YEL003W	-0.578872	0.323104
YDR103W	-0.493967	0.320615
YPL066W	-0.532036	0.319474
YDR344C	-0.607883	0.317918
YOR080W	-0.402965	0.317533
YAL020C	-0.539264	0.316463
YHR152W	-0.85137	0.315031
YPL043W	-0.822207	0.314967
YOR012W	-0.705664	0.313976
YOR064C	-0.425436	0.313633
YLR227C	-0.478873	0.312942
YJL016W	-0.226074	0.311953
YNL003C	-0.195464	0.311329
YCR102C	-0.26636	0.310979
YMR133W	-0.538913	0.309466
YDL240W	-0.516962	0.30874
YBL010C	-0.472901	0.307493
YGR073C	-0.475938	0.306993
YML104C	-0.7274	0.306907
YOR226C	-0.926054	0.305346
YIL150C	-0.522801	0.304843
YOR205C	-0.555926	0.304626
YLL025W	-0.0294329	0.303837
YOR189W	-0.63032	0.302955
YNL082W	-0.57302	0.302438
YNL146W	-0.770074	0.300814
YPL199C	-0.718561	0.300079
YNL063W	-0.335544	0.295935
YHR033W	-0.258327	0.293116
YGL223C	-0.503183	0.292971
YLR396C	-0.632935	0.292487
YOL039W	-0.454835	0.292306
YLR036C	-0.265959	0.291652
YOL079W	-0.467563	0.289311
YPL139C	-1.04441	0.288918
YLR209C	-0.532662	0.288677
YJR061W	-0.411031	0.284428
YLR383W	-0.372835	0.282956
YPR064W	-0.89043	0.282654
YNL294C	-0.586599	0.282271
YBR178W	-0.696347	0.282164
YDR350C	-0.457886	0.280373
YOL157C	-0.189487	0.280227
YBR100W	-0.33985	0.278842
YGR262C	-0.364947	0.278413
YER007C-A	-1.53302	0.277439
YIL023C	-0.38378	0.277283
YDR137W	-0.520591	0.277196
YLR289W	-0.578594	0.276398
YIR035C	-0.308377	0.276315
YJR006W	-0.357236	0.276236
YFL060C	-0.306464	0.276029
YJL148W	-0.025976	0.275603
YBR032W	0.198063	0.275597
YML128C	-0.542644	0.271765
YFR043C	-0.368409	0.271596
YGR257C	-0.354134	0.271492
YBR175W	-0.241613	0.26961
YKL176C	-0.414556	0.268556
YJR060W	-0.658609	0.268224
YMR234W	-0.491893	0.268028
YHR001W	-0.499492	0.266162
YAR029W	-0.618268	0.265715
YMR137C	-0.405281	0.263775
YLR297W	-0.57251	0.263197
YBL078C	-0.675168	0.261326
YHR156C	0.164658	0.260394
YGR075C	-0.364103	0.259633
YNL246W	-0.462832	0.258581
YOR121C	-0.578871	0.257412
YLR166C	-0.430105	0.256612
YNL281W	-0.438003	0.256422
YML099C	-0.421503	0.25631
YHR091C	-0.349095	0.254001
YGR029W	-0.461059	0.253914
YKR087C	-0.468861	0.253774
YML023C	-0.596408	0.252648
YDR526C	-0.498418	0.252281
YJR010C-A	-0.368614	0.252077
YBR188C	-0.705151	0.249987
YGR169C	-0.68499	0.249138
YNR053C	-1.07262	0.249099
YDR315C	-0.528559	0.248441
YKL162C	-0.624498	0.244881
YLR146C	-0.44101	0.243431
YBR167C	-0.40877	0.243278
YDR047W	-0.600783	0.242238
YNL135C	-0.70546	0.241712
YER145C	-0.629711	0.241193
YDL068W	-0.409544	0.240683
YLR074C	-0.830139	0.240425
YER053C	-0.433044	0.239321
YOL143C	-0.0573169	0.238981
YPL040C	-0.362341	0.238403
YML050W	-0.395118	0.238349
YOR219C	-0.46735	0.23833
YER081W	-0.135815	0.238304
YHR081W	-0.453991	0.236616
YOR299W	-0.737505	0.235685
YBR253W	-0.463009	0.235364
YOR319W	-0.688425	0.235106
YJL077C	-0.474183	0.233847
YPL071C	-0.481624	0.23315
YNR074C	-0.296236	0.232516
YLR168C	-0.568205	0.231796
YGR033C	-0.464885	0.230939
YBR264C	-0.491408	0.230057
YGR022C	-0.475681	0.229775
YKR038C	-0.377835	0.229671
YMR181C	-0.716579	0.228868
YPL083C	-0.546585	0.227998
YJL141C	-0.603898	0.227757
YDR444W	-0.325586	0.224933
YMR270C	-0.148535	0.223685
YBR055C	-0.303555	0.223026
YGR136W	-0.573707	0.222561
YMR210W	-0.574321	0.221919
YGR081C	-0.559303	0.221732
YOR268C	-0.60589	0.221073
YBR296C	-1.31973	0.220627
YOL146W	-0.270318	0.220438
YHR170W	-1.43021	0.218912
YGL141W	-0.359098	0.218866
YKL034W	-0.71697	0.215158
YGR224W	-0.375301	0.213282
YOR115C	-0.0936585	0.213159
YML078W	-0.541048	0.212897
YKL149C	-0.557817	0.21197
YML108W	-0.374441	0.211829
YLR233C	-0.821456	0.209468
YHR167W	-0.375915	0.209336
YJL052W	-0.361172	0.208652
YPR188C	-0.625165	0.207904
YLR069C	-0.500131	0.20619
YBL029C-A	-0.513796	0.20461
YLR021W	-0.354906	0.20229
YEL068C	-0.190612	0.202217
YDR465C	-0.449173	0.201803
YLR421C	-0.441187	0.201669
YEL027W	-0.466127	0.201209
YIL016W	-0.484251	0.199971
YER046W	-0.222545	0.19926
YJL069C	-0.582646	0.198809
YDR349C	-0.376656	0.198758
YKL222C	-0.510301	0.198718
YDL062W	-0.58116	0.198361
YNL258C	-0.491022	0.19793
YIR011C	-0.558044	0.197907
YMR106C	-1.15859	0.196113
YDR398W	-0.879181	0.195268
YBL100C	-0.626551	0.194732
YPL214C	-0.248054	0.194719
YER001W	-0.283917	0.19442
YFR038W	-0.68065	0.193023
YIL145C	-0.455024	0.192951
YHR040W	-0.346162	0.192611
YCR076C	-0.441486	0.191436
YOR055W	-0.757035	0.191059
YGR246C	-0.238899	0.189767
YJR159W	-0.0333439	0.188003
YCR012W	-0.0234097	0.187863
YBR010W	-0.659896	0.187426
YAL029C	-1.67348	0.186976
YJL219W	-0.400758	0.18663
YIL131C	-0.845088	0.186071
YIL060W	-0.399108	0.185917
YBR237W	-0.421901	0.185909
YER129W	-0.30998	0.185033
YLR400W	-0.24908	0.184987
YKL024C	-0.247418	0.184838
YGR020C	-0.553226	0.184352
YOR378W	-0.765233	0.184224
YEL018W	-0.495343	0.184061
YDR386W	-0.637658	0.182942
YLL010C	-0.387494	0.182068
YGR280C	-0.548734	0.181781
YGL064C	-0.318502	0.181157
YNL144C	-0.110979	0.180189
YLR071C	-1.89285	0.179096
YKL023W	-0.40401	0.178483
YMR154C	-0.909388	0.178083
YLR236C	-0.538364	0.177615
YML027W	-0.798572	0.176763
YOR331C	-0.651093	0.176468
YHR194W	-0.599681	0.176263
YPL192C	-0.570856	0.175246
YNR055C	-0.530678	0.174226
YLR254C	-0.527584	0.173869
YLR090W	-0.243613	0.173774
YHR053C	-0.541834	0.173465
YGR270W	-0.504592	0.173425
YBR151W	-0.491258	0.173338
YOL036W	0.0698875	0.172711
YNL299W	-0.853704	0.172474
YGR010W	-0.415027	0.171526
YOL088C	-0.470497	0.171422
YGL226W	-0.85661	0.170364
YOL025W	-0.50309	0.169091
YDR288W	-0.37786	0.168918
YDR291W	-0.486087	0.168417
YIL087C	-0.502901	0.16813
YOR289W	-0.836514	0.167997
YDR179W-A	-0.500453	0.167245
YMR163C	-0.776132	0.167209
YDR505C	-0.303533	0.166866
YBR050C	-0.036192	0.163585
YPL138C	-0.437891	0.16327
YNL113W	-0.705354	0.163196
YML016C	-0.565913	0.162186
YPL075W	-0.552024	0.161836
YLR151C	-0.468403	0.16179
YNR014W	-0.763319	0.161507
YOR320C	-0.612066	0.161472
YBR246W	-0.427508	0.161388
YGR103W	-1.13707	0.161193
YLR283W	-0.403012	0.160315
YFR001W	-0.136919	0.160085
YDL004W	-0.739114	0.160055
YGL253W	-0.236145	0.159398
YLR078C	-0.517191	0.158796
YLR270W	-0.561981	0.157458
YML114C	-0.431713	0.155647
YDL148C	-0.843248	0.155425
YLR245C	-0.413532	0.154648
YPL250C	-0.493898	0.153797
YGL086W	-0.384137	0.153552
YJR057W	-0.421953	0.153451
YHR079C	-0.450069	0.152942
YDR352W	-0.45675	0.152459
YNL149C	-0.425618	0.152373
YLR050C	-0.469156	0.151614
YDL102W	-1.06409	0.151397
YFL028C	-0.201176	0.150989
YDR184C	-0.614988	0.150406
YOR220W	-1.44531	0.150344
YOL063C	-0.520746	0.149476
YIL080W	-0.85779	0.149312
YKL061W	-0.623718	0.14921
YPR024W	-1.2111	0.147662
YNR057C	-0.390109	0.145322
YOR090C	-0.511636	0.144877
YER130C	-0.722475	0.144831
YNL286W	-0.528336	0.144646
YNL157W	-0.521661	0.144341
YMR021C	-0.447503	0.143932
YJL072C	-0.227245	0.143891
YPR159W	-1.25824	0.143703
YER163C	-0.514273	0.143577
YOR313C	-0.894612	0.143394
YLL062C	-0.417918	0.142606
YPL248C	-0.539267	0.142558
YPR105C	-0.409647	0.14211
YGR181W	-0.656032	0.142099
YPR112C	-1.2907	0.142007
YBR062C	-0.40555	0.140852
YHR046C	-0.350882	0.139855
YJR112W-A	-0.302706	0.139677
YML056C	-0.431569	0.139516
YHR208W	-0.25724	0.139454
YDR453C	-0.189179	0.139437
YDR134C	-0.77378	0.138114
YDL010W	0.268552	0.138029
YOR148C	-0.690878	0.137797
YIL047C	-0.462026	0.137689
YBR143C	-0.529484	0.136324
YIL004C	-0.581208	0.135916
YDR312W	-0.387117	0.135291
YPL185W	-0.459382	0.134174
YLR212C	-0.671213	0.133491
YOR333C	-0.529551	0.133198
YML087C	-0.325554	0.133008
YIL139C	-0.384559	0.129874
YBR013C	-0.481566	0.129517
YLR187W	-1.03344	0.129501
YDR403W	-0.253656	0.128614
YDR007W	-0.563974	0.128503
YBR233W-A	-0.511207	0.127654
YEL009C	-0.553137	0.126027
YOL090W	-0.546884	0.125035
YGL238W	-0.601391	0.123969
YLL030C	-0.404016	0.123563
YMR058W	-0.775082	0.121765
YNL131W	-0.594404	0.121739
YDR336W	-0.493936	0.121542
YOL062C	-0.633892	0.120997
YNL048W	-0.47384	0.119594
YHR009C	-0.753476	0.119299
YDR395W	-0.517926	0.118827
YML009W-B	-0.706968	0.118534
YBR070C	-0.667523	0.118363
YOL102C	-0.439865	0.11834
YKL052C	-0.631417	0.117442
YKL107W	-0.419724	0.117068
YEL004W	-0.420259	0.116991
YML002W	-0.581643	0.116952
YKR054C	-0.284603	0.116672
YGL106W	-0.814413	0.115297
YMR300C	-0.968051	0.114332
YKR090W	-0.648913	0.113844
YIL105C	-1.2207	0.113102
YPL093W	-0.848673	0.111533
YMR255W	-0.369155	0.111147
YBL011W	-0.454703	0.110292
YKR019C	-0.253932	0.110077
YBR093C	-0.742787	0.109982
YHR044C	-0.369712	0.109175
YGR223C	-0.41383	0.109112
YJR134C	-0.50386	0.108311
YPL241C	0.0332068	0.107724
YPL056C	-0.606937	0.107189
YNL035C	-0.498351	0.10665
YDR053W	-0.559265	0.105734
YDR325W	-0.555132	0.104939
YPL219W	-0.497901	0.104494
YDR371W	-0.316802	0.104019
YMR006C	-0.322736	0.103968
YKL109W	-0.629866	0.103044
YKL093W	-0.529065	0.102631
YKL084W	-0.256009	0.102296
YOR306C	-0.751719	0.102253
YPR133W-A	-0.914813	0.102008
YER071C	-0.500507	0.10119
YHR057C	-0.352421	0.100916
YGR234W	-0.130341	0.100495
YNL205C	-0.348704	0.0994703
YBL028C	-0.478452	0.0985097
YKL022C	-0.451574	0.0961881
YNL009W	-0.264846	0.0943812
YLR317W	-0.497265	0.0940941
YDR151C	-0.418326	0.0940201
YEL052W	-0.317377	0.0937827
YOR175C	-0.471737	0.0928719
YNL145W	-0.874778	0.0922258
YGL130W	-0.758246	0.0901117
YJR097W	-0.458038	0.0896442
YDR169C	-0.391263	0.0896417
YCR013C	-0.0742136	0.0896034
YBR090C	-0.49819	0.0894313
YIL112W	-0.552315	0.0891207
YOR095C	-0.449278	0.0889784
YGL116W	-1.13982	0.0889188
YBR015C	-0.394177	0.0885669
YGR201C	-0.477273	0.0884033
YOR295W	-0.590256	0.0876456
YKL218C	-0.088317	0.0866018
YOL093W	-0.990759	0.085315
YHL026C	-0.530203	0.0852553
YDL121C	-0.613003	0.0840435
YBR156C	-0.669687	0.0838647
YPL141C	-0.698946	0.0822295
YLR375W	-0.869194	0.0815228
YNL050C	-0.41139	0.0815
YKR030W	-0.394854	0.0814
YDR479C	-0.431112	0.0809896
YDR307W	-0.282233	0.0808888
YNL040W	-0.506915	0.0803718
YEL017W	-0.766915	0.0802958
YNL244C	-0.567803	0.078521
YNL011C	-0.385222	0.0773791
YCL061C	-0.633457	0.0769396
YDR482C	-0.68304	0.0763873
YOR194C	-1.12989	0.075275
YER120W	-0.486184	0.0749571
YPL022W	-0.651958	0.0745052
YGR054W	-1.05992	0.0743625
YIL107C	-0.374236	0.0737145
YMR224C	-0.646336	0.073661
YJL091C	-0.60957	0.0726946
YLR433C	-0.337327	0.0722731
YNL042W	-0.41422	0.0722699
YPL053C	-1.24245	0.0721399
YLR045C	-0.593441	0.0717543
YDL174C	-0.30427	0.0713892
YDR063W	-0.755095	0.0711673
YLR455W	-0.518587	0.070826
YNR001C	-0.947481	0.0707165
YML086C	-1.08976	0.0699992
YMR216C	-0.553571	0.0696216
YNL006W	-0.584937	0.0695428
YDL076C	-0.317557	0.0680868
YLR219W	-0.526494	0.0680694
YNL125C	-0.743986	0.0672355
YLL029W	-0.522636	0.0663715
YJR100C	-0.47543	0.0663055
YIL125W	-0.634113	0.0660298
YLR247C	-0.63191	0.0655163
YNL237W	-0.501502	0.065504
YHR135C	-0.866135	0.0644718
YDR527W	-0.378535	0.063704
YNL056W	-0.348547	0.0635929
YDR086C	-0.851209	0.0633846
YER142C	-0.178713	0.0619918
YOR372C	-0.720963	0.0619328
YCR022C	-0.795833	0.0618457
YGL154C	-0.420017	0.0615665
YBL021C	-0.857297	0.0610886
YGR046W	-0.411099	0.0609527
YLR035C	-0.589126	0.0603823
YAR068W	-0.451621	0.0597476
YNL186W	-0.65086	0.0577614
YHL047C	-0.424958	0.0571673
YMR192W	-0.544602	0.0571072
YAL034C	-0.488649	0.0569751
YMR097C	-0.490127	0.0553658
YNR048W	-0.456741	0.055263
YGR079W	-0.786497	0.0517063
YKL053W	-0.631865	0.0515094
YJL093C	-0.478759	0.0505852
YMR182C	-0.580514	0.0493064
YMR184W	-0.690227	0.0484685
YNL086W	-0.456691	0.0481698
YNL198C	-0.337321	0.047516
YDR383C	-0.398523	0.0474392
YKL146W	-0.467569	0.0472189
YGL215W	-0.355132	0.0468935
YDL063C	-0.715169	0.0467114
YAL001C	-0.501184	0.0460977
YOR065W	-0.632863	0.0458611
YDL021W	-0.444124	0.0457314
YNL277W	-0.58616	0.0456112
YDR016C	-0.414377	0.0455907
YDR079C-A	-0.388206	0.0430981
YHL014C	-0.44342	0.0424218
YIR010W	-1.022	0.0423347
YLR453C	-0.665078	0.0420761
YLR016C	-0.282147	0.0419262
YER098W	-0.394172	0.0419149
YJR054W	-0.496391	0.0415801
YBR242W	-0.496382	0.0410639
YOR033C	-0.255098	0.0385938
YLL022C	-0.411439	0.037921
YLR115W	-0.540076	0.0379102
YPR138C	-0.835459	0.0375373
YNL029C	-0.282671	0.0364115
YGL185C	-0.389169	0.0362228
YDR332W	-0.25946	0.0356254
YJL053W	-0.434188	0.0346551
YAR030C	-0.380889	0.0338776
YNL261W	-0.469249	0.0336547
YGR168C	-0.577381	0.0332809
YOR139C	-0.638379	0.03265
YMR132C	-0.612807	0.0325999
YOL091W	-0.329766	0.0309294
YLR441C	-0.404677	0.0306468
YPL269W	-0.725811	0.0290423
YDR125C	-0.396298	0.0289852
YMR269W	-0.618415	0.0288264
YLR404W	-0.459219	0.028733
YML113W	-0.700069	0.0277107
YER133W	-0.490866	0.0274636
YNL314W	-0.248275	0.0269488
YGR137W	-0.548534	0.0265049
YJR058C	-0.497004	0.0264309
YGR023W	-0.676655	0.0260408
YHR186C	-0.430068	0.0255981
YOR348C	-0.263298	0.0245558
YCR085W	-0.550023	0.0244335
YLR037C	-0.264357	0.022022
YGL002W	-0.366062	0.0215907
YLL001W	-0.571906	0.0212749
YMR201C	-0.477296	0.0211362
YGR170W	-0.406653	0.0181192
YDL051W	-0.789423	0.0175049
YMR156C	-0.319479	0.0172999
YHR100C	-0.350159	0.0171105
YNL210W	-0.307607	0.0165765
YKR037C	-0.580741	0.0161534
YGR264C	-0.369855	0.0157493
YPL078C	-0.769889	0.0155206
YHR112C	-0.370455	0.0143596
YHR078W	-0.429641	0.0141782
YIR008C	-0.361191	0.0139854
YHL008C	-0.553241	0.0136835
YHL032C	-0.469016	0.013358
YPL230W	-0.59409	0.012583
YNL087W	-0.437018	0.0122891
YBR208C	-0.538455	0.0119932
YNR036C	-0.761258	0.01075
YER114C	-0.854749	0.0105265
YKR070W	-0.256362	0.0100606
YKL135C	-0.386291	0.0097915
YGR044C	-0.626828	0.00938413
YOR202W	-0.611036	0.00927144
YNL039W	-0.556973	0.0087427
YGR149W	-0.509951	0.00799307
YGR124W	-0.345649	0.0072248
YBR134W	-0.584817	0.00721745
YKR023W	-0.306221	0.00716749
YDR286C	-0.47488	0.00693592
YHL025W	-0.510984	0.00657771
YDR424C	-0.507762	0.00577491
YGL081W	-0.188582	0.00469733
YHL015W	-0.789237	0.00448341
YLR224W	-0.380458	0.00424234
YBR250W	-0.549868	0.00276517
YIL121W	-0.532654	0.00249241
YMR157C	-0.470028	0.002214
YIL046W	-0.490342	0.00210222
YOR367W	-0.628579	0.00201583
YGR155W	-1.6385	0.00165206
YER004W	-0.426276	0.00140445
YMR264W	-0.441705	0.00125061
YDR034C	-0.414159	-0.000402323
YML063W	-0.411521	-0.000832941
YKL215C	-0.421088	-0.000973682
YHR028C	-0.57044	-0.000998056
YER173W	-0.14101	-0.00288742
YKL011C	-0.339995	-0.00354231
YJR043C	-0.592073	-0.00369572
YNR037C	-0.896277	-0.0042299
YKL216W	0.107209	-0.00471972
YBR234C	-0.509152	-0.00489199
YIR021W	-0.492987	-0.00510305
YGR266W	-0.355687	-0.00537464
YDL049C	-0.88541	-0.00645588
YKL156W	-0.585277	-0.0065403
YJR017C	-0.301475	-0.007273
YAL066W	-0.211014	-0.00790863
YIR025W	-0.273075	-0.00791397
YNR046W	-0.528512	-0.00852115
YAR023C	-0.272959	-0.00860718
YCR015C	-0.594287	-0.00913746
YBR075W	-0.476925	-0.00915211
YOR182C	-1.15046	-0.00919474
YLR022C	-0.54311	-0.00921648
YHR030C	-1.25748	-0.00927069
YLR381W	-0.496504	-0.0101314
YNL065W	-0.214085	-0.0102037
YGL124C	-0.643983	-0.0107884
YJL189W	-0.775599	-0.0110666
YLR365W	-0.604422	-0.0111305
YPR052C	-0.582765	-0.0114877
YDL031W	-0.870659	-0.0120209
YJR119C	-0.385006	-0.0124639
YOR103C	-0.572697	-0.0125914
YLR226W	-0.411133	-0.0126231
YKL193C	-0.131551	-0.0127875
YDL067C	-0.83876	-0.0127978
YLR221C	-0.556168	-0.0130966
YMR122C	-0.881347	-0.0137048
YJL073W	-0.489121	-0.0140318
YNR017W	-0.4776	-0.01475
YOR126C	-0.780426	-0.0153703
YPR101W	-0.588291	-0.0167676
YHR143W	-0.666518	-0.0170835
YLR320W	-0.602084	-0.0172245
YJL099W	-0.469768	-0.0179555
YMR135C	-0.671269	-0.018155
YOL003C	-0.565947	-0.0183219
YDR140W	-0.123769	-0.0187053
YBR153W	-0.280172	-0.0188123
YPR050C	-0.4259	-0.0198741
YJL046W	-0.329763	-0.0200925
YNL193W	-0.491983	-0.0210074
YIR002C	-0.478809	-0.0216056
YDR124W	-0.228864	-0.0225616
YPL137C	-0.342971	-0.0229324
YOR339C	-0.366881	-0.0236128
YHL028W	-1.37892	-0.0239828
YOR002W	-0.561863	-0.0242886
YNL150W	-0.463108	-0.0246318
YNL025C	-0.358584	-0.0248665
YGL083W	-0.229843	-0.0252523
YOL033W	-0.175201	-0.025504
YJR139C	-0.430441	-0.0256732
YPR022C	-0.636481	-0.0266601
YJL217W	-0.0196243	-0.0267265
YNL053W	-0.464784	-0.0269933
YGL029W	-0.73759	-0.0272094
YHR144C	-0.667833	-0.0278745
YPL005W	-0.522326	-0.0288777
YNL147W	-0.702278	-0.0288932
YBR058C	-0.414856	-0.0297531
YNL036W	-0.455065	-0.029861
YLR174W	-0.600186	-0.0299631
YML101C-A	-0.429338	-0.03125
YDL241W	-0.0706627	-0.0319461
YOR263C	-0.578453	-0.0329405
YNL091W	-0.58496	-0.0331213
YGR100W	-0.405513	-0.0332607
YPR053C	-0.476521	-0.0333586
YIL009W	-0.549396	-0.0336829
YGR275W	-0.704037	-0.0338352
YHL009C	-0.680852	-0.0370517
YJL146W	-0.489008	-0.0370986
YMR254C	0.15892	-0.0371471
YOR246C	-0.541968	-0.0373811
YPR173C	-0.399338	-0.0374007
YLR249W	-0.059137	-0.0374803
YPL211W	-0.375625	-0.0377179
YGR077C	-0.577309	-0.0377705
YCR087W	-0.482983	-0.0387437
YMR072W	-0.583481	-0.0390496
YJL090C	-0.42906	-0.0393446
YDR478W	-0.497772	-0.0395039
YPL143W	-0.986659	-0.0400589
YJR106W	-0.325093	-0.040391
YOR020W-A	-0.643882	-0.0408346
YER152C	-0.483665	-0.0416035
YOR245C	-0.463024	-0.0422011
YOL065C	-0.483236	-0.0422245
YNL008C	-0.333028	-0.0433716
YOL153C	-0.362893	-0.0435076
YHR060W	-0.413675	-0.0438695
YFR005C	-0.386329	-0.0440261
YOL080C	-1.08814	-0.0440878
YGL232W	-0.39078	-0.0447895
YDL025C	-0.528952	-0.0449872
YGR218W	-0.333592	-0.0486283
YER174C	-0.439818	-0.0488705
YDR519W	-0.602277	-0.0489185
YHR087W	-1.02639	-0.0508181
YIR005W	-0.242078	-0.0521284
YNL239W	-0.429364	-0.0527571
YJL184W	-0.681145	-0.0533401
YDR409W	-0.407894	-0.0537288
YNL138W-A	-0.810451	-0.0539541
YLR451W	-0.443851	-0.054323
YJL168C	-0.669719	-0.0544448
YAL060W	-0.291318	-0.0547145
YDL125C	-0.513965	-0.0548434
YMR048W	-0.275054	-0.0554125
YPR185W	-0.591922	-0.0555863
YER128W	-0.266316	-0.0556601
YHR131C	-0.518533	-0.0559663
YMR231W	1.36585	-0.0564967
YGL055W	-0.287407	-0.0576524
YDR393W	-0.401666	-0.0578134
YGR226C	-0.56026	-0.0578958
YGR099W	-1.0657	-0.0584026
YDL213C	-0.516601	-0.0595813
YOR052C	-0.297897	-0.0599388
YGR193C	-0.536218	-0.0607498
YPR002W	-0.327652	-0.0610476
YDR064W	-0.529233	-0.0613345
YJR112W	-0.831158	-0.0613614
YMR046C	-0.263923	-0.0618412
YCR019W	-0.300335	-0.0619951
YGR161W-C	-0.296677	-0.0626951
YML094W	-0.203372	-0.0627548
YAR027W	-0.610912	-0.062959
YKL081W	-0.498901	-0.0630085
YHL034W-A	-0.57061	-0.0631916
YGR203W	-0.612834	-0.063267
YOR243C	-0.666231	-0.0633504
YJL081C	-0.395666	-0.0636617
YPR067W	-0.430329	-0.0653308
YNL170W	-0.495666	-0.0654277
YLR290C	-0.578567	-0.0657878
YDL005C	-0.519513	-0.0657938
YOR174W	-0.511009	-0.0659482
YPL001W	-0.219154	-0.0661826
YBR247C	-0.452399	-0.0669455
YKL220C	0.950483	-0.0671057
YPL109C	-0.697501	-0.0671464
YGR222W	-0.21977	-0.0672656
YLR397C	-0.623999	-0.0674866
YOR324C	-0.558429	-0.0684374
YEL066W	-0.237109	-0.0685097
YLR215C	-0.563917	-0.0686238
YBR280C	-0.0681926	-0.0686985
YMR041C	-0.181573	-0.0693982
YLR192C	-0.377908	-0.0699726
YCR060W	-0.371261	-0.0704591
YOR183W	-0.865801	-0.0705478
YJL031C	-0.493205	-0.0707121
YGL111W	-0.484611	-0.0710801
YDR122W	-0.393829	-0.0712586
YNL169C	-0.593775	-0.0713557
YOR275C	-0.377302	-0.0719194
YNL182C	-0.376496	-0.073324
YMR077C	-0.29003	-0.0733357
YLR395C	-0.49604	-0.0738119
YGR202C	-0.412442	-0.0741485
YNR061C	-0.402628	-0.0742178
YOR057W	-0.297552	-0.0745803
YDR322C-A	-0.437686	-0.0750919
YLR405W	-0.599954	-0.0754431
YHR095W	-0.260269	-0.0755569
YDR017C	-0.443048	-0.0758243
YLR118C	-0.512707	-0.0758317
YKR004C	-0.298839	-0.0761831
YMR008C	-0.177402	-0.0767758
YJL013C	-0.772891	-0.0767898
YJL206C	-0.469982	-0.0771821
YLL054C	-0.845179	-0.0779112
YOR288C	-0.479009	-0.0786486
YHR101C	-0.383647	-0.0788959
YKR026C	-0.375012	-0.0789709
YNL206C	-0.596272	-0.0795682
YMR068W	-0.194011	-0.0796878
YLR360W	-0.262712	-0.0797828
YBR022W	-0.481138	-0.0798845
YML045W	-0.176462	-0.080256
YEL071W	-0.593708	-0.0803962
YDL073W	-0.433414	-0.0804807
YMR212C	-0.644192	-0.0808795
YER070W	-1.00643	-0.0810351
YHR003C	-0.400101	-0.0813687
YPL046C	-0.293797	-0.0829905
YER074W-A	-0.49876	-0.0830528
YDR181C	-0.476674	-0.0832465
YDL053C	-0.472448	-0.0837836
YHR041C	-0.487982	-0.0840985
YDL092W	-0.703624	-0.0843052
YJR116W	0.0435017	-0.0856348
YCL063W	-0.635792	-0.0856794
YLR287C	-0.561574	-0.0857948
YDR253C	-0.467488	-0.0860631
YOL142W	-0.489033	-0.0874405
YGR198W	-0.586604	-0.0880419
YJR011C	-0.329417	-0.0895648
YML102W	-0.379145	-0.0898418
YGR016W	-0.107443	-0.090046
YOR297C	-0.611055	-0.0901175
YDR067C	-0.353993	-0.0903153
YDR413C	-0.536017	-0.0903391
YMR067C	-0.294968	-0.0904226
YPL076W	-0.552355	-0.0905167
YNR067C	-0.404208	-0.090719
YHR171W	-0.502135	-0.0922191
YDL190C	-0.471717	-0.0922379
YNL022C	-0.371963	-0.0925431
YJR127C	-0.161973	-0.0928315
YDL058W	-0.673869	-0.093795
YLR197W	-0.540163	-0.0949658
YMR078C	-0.580485	-0.0951316
YOR094W	-0.500654	-0.0959733
YML037C	-0.455984	-0.0960074
YOR101W	-0.379625	-0.0961081
YKR093W	-0.613189	-0.0964176
YOR098C	-0.442382	-0.0966129
YDR118W	-0.52861	-0.0967461
YOR353C	-0.204864	-0.0969658
YLR362W	-0.649034	-0.0971957
YNR064C	-0.410887	-0.0978093
YLR122C	-0.491461	-0.0985095
YER183C	-0.359333	-0.0988519
YGL005C	-0.282191	-0.0993089
YDL126C	-0.354743	-0.0999211
YBL026W	-0.564991	-0.100168
YJR004C	-0.341204	-0.100206
YJL030W	-0.189617	-0.100246
YDR100W	-0.719751	-0.100436
YAR033W	-0.256669	-0.100441
YOR031W	-0.41743	-0.102199
YER060W-A	-0.604965	-0.102208
YNL112W	-0.585021	-0.103108
YLR135W	-0.680852	-0.10338
YOR036W	-0.543738	-0.10343
YGL050W	-0.599034	-0.103685
YPR075C	-1.11153	-0.10431
YHR026W	-0.492035	-0.104504
YHR122W	-0.347074	-0.104662
YJL021C	-0.486734	-0.104911
YHR187W	-0.240192	-0.105803
YDR417C	-0.895807	-0.107162
YLR073C	-0.51388	-0.107249
YPR158W	-0.427285	-0.107596
YML094C-A	-0.260812	-0.108039
YCL046W	-0.841976	-0.108144
YNL175C	-0.50144	-0.108217
YPL213W	-0.367235	-0.109007
YBR271W	-0.300593	-0.109179
YKL189W	-0.694414	-0.109602
YPR056W	-0.223769	-0.110158
YJR040W	-0.441516	-0.110346
YOR091W	-0.664431	-0.110455
YDL012C	-0.394337	-0.110555
YKR052C	-0.505485	-0.110643
YOR329C	-0.540746	-0.110877
YGL074C	-0.269119	-0.111008
YFR017C	-0.271936	-0.111216
YFL044C	-0.362223	-0.111944
YBR109C	-0.571378	-0.112074
YJL106W	-0.589563	-0.11239
YDR379W	-0.511436	-0.112392
YMR130W	-0.296692	-0.112837
YMR233W	-0.388353	-0.112931
YNL058C	0.0190304	-0.112964
YDR333C	-0.296624	-0.113314
YNL267W	-1.02401	-0.11332
YNL285W	-0.0313016	-0.113407
YHR025W	-0.38517	-0.113527
YJL057C	-0.275108	-0.113634
YER187W	-0.596685	-0.114051
YMR064W	-0.78661	-0.114111
YOL012C	-0.723755	-0.114383
YMR126C	-0.401059	-0.114711
YBR144C	-0.404222	-0.114828
YLR239C	-0.485107	-0.115263
YOR045W	-0.802859	-0.115414
YJL066C	-0.39666	-0.117185
YKL104C	-0.49199	-0.118538
YDR087C	-0.499832	-0.118693
YPR127W	-0.339536	-0.118875
YML077W	-0.417361	-0.119188
YHR155W	-0.16387	-0.119246
YBR258C	-0.4557	-0.119275
YPR165W	-1.08274	-0.119744
YHR011W	-0.407076	-0.120335
YML096W	-0.490818	-0.120844
YLR412W	-0.54704	-0.121728
YLR411W	-0.355391	-0.121762
YDR438W	-0.473292	-0.121765
YAL055W	-0.457033	-0.122427
YCR043C	-0.566495	-0.122716
YGL248W	-0.598992	-0.123652
YLR258W	-0.859444	-0.123992
YPR198W	-0.356025	-0.124437
YKR098C	-0.321708	-0.124656
YJR136C	-0.359413	-0.12479
YER100W	-0.553673	-0.125524
YDR156W	-0.419465	-0.125761
YCR036W	-0.544902	-0.126151
YKL002W	-0.391331	-0.126205
YIL062C	-0.700591	-0.12679
YGL053W	-0.482472	-0.127089
YJR129C	-0.0673507	-0.127209
YFL052W	-0.372537	-0.127517
YHR197W	-0.415777	-0.127666
YKR101W	-0.297036	-0.128302
YNL124W	-0.492137	-0.128693
YMR079W	-0.568021	-0.129037
YDR179C	-0.466981	-0.129594
YJL196C	-0.255333	-0.130112
YER016W	-0.349366	-0.130238
YLR210W	-0.407866	-0.130499
YGL078C	-0.846333	-0.130584
YER119C	-0.329687	-0.130716
YIL138C	-0.474386	-0.130773
YKR086W	-0.275533	-0.13134
YGL179C	-0.643271	-0.13193
YDR532C	-0.459961	-0.132627
YEL010W	-0.651361	-0.132725
YLR059C	-0.349332	-0.133172
YPL161C	-0.28828	-0.133935
YDR057W	-0.245823	-0.134409
YKR027W	-0.364022	-0.134431
YGL169W	-0.484541	-0.134565
YDR281C	-0.561784	-0.134749
YFL017C	-0.604875	-0.135006
YJR099W	-0.124627	-0.135204
YPL017C	-0.617127	-0.135313
YHR111W	-0.282267	-0.135449
YBR102C	-0.302482	-0.135498
YOL111C	-0.488703	-0.136237
YKR001C	-0.556832	-0.136935
YLR399C	-0.515585	-0.13698
YOR108W	-0.214983	-0.137205
YCL049C	-0.353878	-0.137568
YPR131C	-0.522312	-0.1376
YDR003W	-0.378014	-0.13775
YJR005W	-0.385689	-0.138191
YGL226C-A	-0.605923	-0.138666
YMR074C	-0.56726	-0.139002
YNR025C	-0.414603	-0.139021
YNL064C	-0.936397	-0.139107
YKL186C	-0.491049	-0.139735
YNL143C	-0.619549	-0.140401
YNL226W	-0.451815	-0.140731
YGL191W	-0.877271	-0.141683
YPL030W	-0.515465	-0.141759
YLR363C	-0.646771	-0.142757
YOL126C	-0.152051	-0.142809
YML003W	-0.544158	-0.143291
YKR071C	-0.0636607	-0.143977
YOR102W	-0.680006	-0.144176
YDL046W	-0.371295	-0.144623
YOR053W	-0.600211	-0.144654
YHR115C	-0.38673	-0.144777
YNL219C	-0.397648	-0.145003
YOL096C	-0.637159	-0.145062
YPR065W	-0.485505	-0.14551
YGL139W	-0.416252	-0.145646
YKL128C	-0.480134	-0.145855
YOR118W	-0.4942	-0.146229
YLR424W	-0.673602	-0.146245
YLR328W	-0.567839	-0.146667
YPR008W	-0.690808	-0.146966
YNL016W	-0.683126	-0.146991
YDR036C	-0.339527	-0.147533
YFL025C	-0.521499	-0.148198
YER176W	-0.680085	-0.148239
YGR096W	-0.649589	-0.14827
YNL292W	-0.476955	-0.148504
YMR217W	-0.480309	-0.148657
YHR214W	-0.847364	-0.148822
YDR506C	-0.507026	-0.149032
YLL043W	-0.530595	-0.149216
YPR057W	-0.470648	-0.149661
YKL082C	-0.616929	-0.150118
YOR377W	-0.53323	-0.150385
YDL142C	-1.11428	-0.150578
YKL108W	-0.403832	-0.150877
YGL017W	-0.296749	-0.151048
YMR073C	-0.375208	-0.151194
YHR113W	-0.328456	-0.151341
YDR357C	-0.502275	-0.151357
YOR249C	-0.662559	-0.151448
YMR246W	-0.296167	-0.152388
YBL068W	-0.392556	-0.15241
YGL121C	0.0564714	-0.152441
YNL033W	-0.411526	-0.152578
YJL112W	-0.484888	-0.152775
YLR407W	-0.455021	-0.153369
YOR054C	-0.499905	-0.153527
YLR329W	-0.482445	-0.153563
YPL246C	-0.758104	-0.153853
YHR191C	-0.206525	-0.154228
YBR210W	-0.426923	-0.155003
YML015C	-1.14447	-0.155037
YDR346C	-0.533983	-0.155323
YLR194C	-0.601135	-0.155497
YHR071W	-0.169948	-0.156324
YCR096C	-0.685316	-0.156504
YOL122C	-0.323347	-0.15665
YIL092W	-0.484421	-0.156657
YOR342C	-0.420033	-0.156905
YBL095W	-0.605934	-0.156909
YGR003W	-0.222012	-0.156931
YOR145C	-0.452865	-0.157006
YJR122W	-0.483138	-0.157387
YJR030C	-0.470521	-0.157426
YKL110C	-0.420752	-0.157472
YLR111W	-0.74342	-0.157561
YGR263C	-0.278696	-0.157656
YOL155C	-0.437651	-0.157781
YLL051C	-0.719616	-0.157971
YDL002C	-0.318435	-0.158898
YGL212W	-0.413071	-0.158927
YBL031W	-0.529139	-0.159253
YDR378C	-0.442314	-0.159668
YKL120W	0.0586007	-0.159984
YLL065W	-0.563819	-0.16035
YMR178W	-0.522265	-0.160428
YNL152W	-0.446617	-0.160892
YPR081C	-0.444876	-0.161105
YLR440C	-0.620097	-0.16156
YOL145C	-0.489572	-0.161933
YDL217C	-0.390207	-0.162013
YLR456W	-0.474227	-0.162275
YOR247W	-0.735265	-0.162631
YEL053C	-0.249476	-0.162824
YKL138C	-0.633084	-0.162933
YHR149C	-0.550819	-0.163325
YMR259C	-0.265093	-0.163653
YNR024W	-0.530881	-0.163847
YOR248W	-0.674178	-0.164064
YKL018C-A	-0.514584	-0.164762
YKL015W	-0.291576	-0.16484
YGR138C	-0.700106	-0.164883
YHR072W-A	-0.512198	-0.165317
YML072C	-0.517831	-0.165555
YLR112W	-0.500493	-0.165903
YAL025C	-0.27928	-0.166162
YDR530C	-0.476527	-0.166429
YGR104C	-0.442315	-0.166513
YHR188C	-0.534126	-0.166583
YGL022W	-0.303582	-0.166995
YDR138W	-0.41388	-0.167058
YHR066W	-0.454907	-0.167163
YLR102C	-0.352703	-0.167184
YLR349W	-0.0113997	-0.168226
YBR288C	-0.364006	-0.168251
YPR041W	-0.501697	-0.168585
YLR225C	-0.446477	-0.168745
YIL096C	-0.258532	-0.168863
YPL051W	-0.492132	-0.169209
YML110C	-0.366092	-0.16941
YKR060W	-0.457371	-0.169439
YIL152W	-0.36686	-0.169548
YFR046C	-0.305627	-0.169579
YDR233C	-0.431191	-0.169871
YDR295C	-0.434455	-0.169898
YOR073W	-0.63571	-0.16992
YDR308C	-0.39631	-0.170091
YHR192W	-0.756858	-0.170149
YGR200C	-0.343451	-0.170967
YGL068W	-0.345153	-0.170974
YLR348C	-0.166723	-0.170997
YER079C-A	-0.635606	-0.172044
YBR212W	-0.909808	-0.172071
YDR321W	-0.447497	-0.172306
YER134C	-0.507594	-0.173515
YNL326C	-0.333986	-0.173687
YPL134C	-0.31362	-0.175363
YIL076W	-0.544082	-0.175876
YAL038W	-0.181787	-0.175931
YER136W	-0.54898	-0.176049
YGL157W	-0.0802817	-0.176097
YDR458C	-0.365791	-0.176205
YAR019C	-0.444947	-0.17649
YPL252C	-0.616249	-0.17658
YDL216C	-1.38043	-0.176697
YHR039C	-0.513716	-0.177107
YPL225W	-0.548828	-0.178369
YOR200W	-0.466107	-0.178436
YJL079C	-0.932772	-0.178475
YGL140C	-0.159775	-0.178488
YMR096W	-0.405633	-0.17864
YOR092W	-0.617008	-0.17865
YPL190C	-0.406823	-0.179195
YBR221C	-0.323293	-0.179366
YER137C	-0.465188	-0.179426
YMR200W	-0.471673	-0.180428
YMR305C	-0.322658	-0.18063
YGR160W	-0.377878	-0.180883
YLR275W	-0.400574	-0.181014
YJL210W	-0.597678	-0.181257
YML014W	-0.441887	-0.181718
YBR129C	-0.392256	-0.181847
YMR245W	-0.316033	-0.181934
YPR025C	-0.307029	-0.182343
YBR135W	-0.44293	-0.182548
YBR078W	-0.529641	-0.182662
YJR130C	-0.204341	-0.182887
YLR124W	-0.538972	-0.183136
YGR109C	-0.571375	-0.183394
YOR198C	-0.859698	-0.18353
YER118C	-0.743116	-0.183532
YGL198W	-0.519542	-0.183614
YGR108W	-0.869813	-0.1841
YJL033W	-0.509616	-0.184401
YMR172W	-0.695249	-0.18549
YMR100W	-0.559435	-0.185884
YKL058W	-0.495887	-0.185966
YGR186W	-0.57085	-0.186339
YGR258C	-0.530264	-0.186444
YML090W	-0.656197	-0.186647
YJL020C	-0.529792	-0.186764
YLR363W-A	-0.353056	-0.186854
YER110C	-0.603539	-0.186973
YOR223W	-0.433965	-0.187331
YNL308C	-0.276711	-0.187505
YPR140W	-0.467928	-0.188447
YDL207W	-0.538528	-0.188526
YPR055W	-0.619364	-0.189036
YDR360W	-0.415246	-0.189115
YIL031W	-0.561287	-0.189889
YBR282W	-0.376688	-0.189927
YOR185C	-0.61788	-0.190566
YKL078W	-0.462776	-0.19059
YMR092C	-0.409666	-0.190613
YLR434C	-0.470024	-0.190636
YDR045C	-0.275689	-0.191043
YGL013C	-0.597552	-0.191455
YGL085W	-0.367667	-0.192307
YLR007W	-0.378801	-0.19231
YNL275W	-0.272832	-0.192367
YGR056W	-0.547772	-0.192448
YMR026C	-0.256157	-0.192732
YJR014W	-0.502996	-0.193158
YLR374C	-0.587891	-0.193544
YDR166C	-0.674533	-0.193755
YMR075W	-0.401054	-0.1941
YNR049C	-0.377506	-0.19444
YPL129W	-0.53225	-0.194583
YML010W	-0.43594	-0.194711
YOL029C	-0.395438	-0.196107
YGR002C	-0.614926	-0.196159
YFL001W	-0.672669	-0.196465
YER025W	-0.485183	-0.196499
YDR234W	-0.303969	-0.197336
YGL051W	-0.376713	-0.197362
YLR155C	-0.669666	-0.197482
YDR198C	-0.493524	-0.19763
YHR038W	-0.397994	-0.197666
YPL159C	-0.495086	-0.197836
YBR087W	-0.334207	-0.198265
YOR144C	-0.648486	-0.198967
YIL085C	-0.253202	-0.199225
YLL035W	-0.392386	-0.199303
YJL059W	-0.217354	-0.199608
YMR016C	-0.315222	-0.19967
YNL190W	-0.281669	-0.200484
YLR228C	-1.12432	-0.200635
YHR154W	-0.466422	-0.200648
YMR014W	-0.621448	-0.201121
YOR277C	-0.438973	-0.20131
YKL072W	-0.40987	-0.201343
YIL147C	-0.421118	-0.202067
YMR258C	-0.420415	-0.202163
YBR245C	-0.326416	-0.202326
YOR308C	-0.46724	-0.202996
YDR217C	-0.27976	-0.203085
YOR335C	-0.487088	-0.203865
YPL239W	-0.4212	-0.204031
YHR114W	-0.550454	-0.20436
YKL099C	-0.562187	-0.204393
YPL104W	-0.321821	-0.205391
YMR113W	-0.602754	-0.205732
YJR143C	-0.438496	-0.20595
YLL017W	-0.498383	-0.206197
YMR277W	-0.512353	-0.206553
YBR066C	-0.77243	-0.206574
YPL007C	-0.324234	-0.20757
YDR039C	-0.462566	-0.207726
YDR359C	-0.330818	-0.207764
YDR399W	-0.243641	-0.208241
YOL052C	-0.249195	-0.208331
YBR285W	-0.404315	-0.208721
YGL202W	-0.362811	-0.208986
YLL008W	-0.437264	-0.209733
YLR325C	-0.512269	-0.210111
YDR120C	-0.269803	-0.210837
YGR189C	-0.764317	-0.2112
YDL153C	-0.668552	-0.211214
YMR203W	-0.35147	-0.211314
YDR384C	-0.504747	-0.211445
YGR220C	-0.580745	-0.211864
YKL046C	-0.368909	-0.212079
YKL062W	-0.5756	-0.212488
YGL011C	-0.381513	-0.212694
YGR245C	-0.656364	-0.213054
YCR094W	-0.33693	-0.213242
YKR016W	-0.496104	-0.213498
YGR047C	-0.561874	-0.213655
YGR095C	-0.39808	-0.214683
YJR033C	-0.369059	-0.214854
YGL134W	-0.382189	-0.215246
YLR003C	-0.569166	-0.215576
YKL085W	-0.580901	-0.21631
YDR252W	-0.410486	-0.216473
YKL106W	-0.451796	-0.218185
YHR005C	-0.728195	-0.218195
YGL079W	-0.17024	-0.218455
YER011W	-0.793445	-0.218654
YJL138C	-0.398482	-0.218996
YGR102C	-0.653271	-0.219334
YHL034C	-0.499165	-0.219677
YHR073W	-0.437585	-0.220749
YIL059C	-0.286092	-0.220762
YMR301C	-0.394822	-0.2208
YJR067C	-0.411538	-0.221246
YNL114C	-0.504689	-0.221309
YDR164C	-0.375262	-0.221447
YDR369C	-0.163287	-0.221908
YIL064W	-0.334002	-0.222239
YDR242W	-0.434724	-0.222465
YLR188W	-0.481429	-0.222596
YLR331C	-0.740675	-0.223565
YPL263C	-0.621595	-0.223976
YML007W	-0.351396	-0.224074
YML124C	-0.485298	-0.224391
YOR074C	-0.714919	-0.224931
YKL177W	-0.709456	-0.225176
YGR211W	-0.707145	-0.225341
YNL211C	-0.408732	-0.225476
YGL246C	-0.554789	-0.225667
YOR231W	-0.539678	-0.225729
YER125W	-0.442342	-0.225815
YPR162C	-0.405024	-0.226207
YDR485C	-0.356695	-0.226217
YBR173C	-0.572689	-0.226559
YGR241C	-0.393221	-0.226596
YNL119W	-0.597553	-0.226874
YEL061C	-0.499799	-0.226904
YPL087W	-0.615143	-0.227172
YDR152W	-0.469928	-0.227315
YDR264C	-0.414075	-0.22743
YLR208W	-0.482598	-0.227498
YNL217W	-0.340397	-0.227517
YOR213C	-0.615753	-0.227896
YHR161C	-0.462967	-0.228526
YNL160W	-0.566594	-0.229311
YKL003C	-0.56897	-0.229626
YBR111W-A	-0.508645	-0.230332
YAL043C	-0.425573	-0.230412
YFL034W	-0.336152	-0.230797
YNR012W	-0.417452	-0.231399
YAL027W	-0.458574	-0.231425
YGR183C	-0.894352	-0.231649
YCL044C	-0.666696	-0.231867
YPL184C	-0.371558	-0.231948
YOR044W	-0.400762	-0.232325
YJR056C	-0.183602	-0.23255
YPL054W	-0.551749	-0.23277
YML011C	-0.232375	-0.232841
YGR005C	-0.304966	-0.233329
YAL059W	-0.258316	-0.233384
YLR008C	-0.313609	-0.233598
YPL096W	-0.539623	-0.233865
YBR047W	-0.612642	-0.234406
YNL130C	-0.409827	-0.234433
YMR076C	-0.726544	-0.234447
YML127W	-0.56045	-0.234605
YIL067C	-0.436692	-0.235071
YER161C	-0.437966	-0.23531
YIL123W	-0.877784	-0.2359
YGR274C	-0.422375	-0.236462
YOL070C	-0.501005	-0.236582
YGR071C	-0.608567	-0.236754
YJL095W	-0.334097	-0.237006
YDR328C	-0.352418	-0.237167
YNL099C	-0.383294	-0.237191
YOR188W	-0.608641	-0.237206
YLR167W	-0.444054	-0.237271
YNL264C	-0.369043	-0.23742
YGR284C	-0.360695	-0.237672
YNL133C	-0.617073	-0.23866
YER162C	-0.389352	-0.239498
YPL279C	-0.334405	-0.23983
YGR072W	-0.388759	-0.239875
YLR011W	-0.290852	-0.239905
YJL205C-A	-0.729118	-0.240435
YGL150C	-0.564204	-0.240487
YEL063C	-0.345798	-0.240631
YGL062W	0.00676961	-0.240763
YOL023W	-0.589257	-0.240879
YLR435W	-0.381163	-0.240928
YPR171W	-0.34524	-0.241323
YOL127W	-0.610368	-0.241842
YAR018C	-0.38205	-0.241851
YPL208W	-0.403499	-0.242561
YEL036C	-0.465579	-0.242652
YPL144W	-0.247739	-0.242835
YLR333C	-0.649263	-0.242971
YMR057C	-0.83463	-0.243064
YIL111W	-0.976245	-0.243157
YGR162W	-0.502399	-0.24326
YCL024W	-0.508584	-0.243708
YCL026C-A	-0.21578	-0.24471
YPR170C	-0.479679	-0.244816
YOL100W	-0.576593	-0.245018
YKR046C	-0.312116	-0.245417
YOL103W	-0.326687	-0.245797
YHL004W	-0.526638	-0.245896
YER177W	-0.651445	-0.246136
YLR248W	-1.06776	-0.2463
YOR161C	-0.702061	-0.246767
YGR052W	0.226997	-0.246801
YPR161C	-0.569217	-0.247023
YOL027C	-0.437171	-0.247182
YGL144C	-0.453319	-0.247209
YLR202C	-0.163221	-0.247702
YNL018C	-0.348105	-0.248038
YPL194W	-0.473873	-0.248293
YKL150W	-0.587758	-0.248528
YJR044C	-0.656156	-0.248548
YML004C	-0.479528	-0.248927
YML034W	-0.693886	-0.24954
YBR042C	-0.33558	-0.24959
YGR238C	-0.677099	-0.249706
YHR119W	-0.567371	-0.250653
YMR119W	-0.71309	-0.250891
YGR267C	-0.224406	-0.250901
YKL190W	-0.414095	-0.251151
YIL035C	-0.375799	-0.25226
YKR029C	-0.456879	-0.252446
YER138C	-0.465464	-0.253483
YLR131C	-0.342805	-0.254471
YBR021W	-0.149328	-0.25449
YGR255C	-0.49518	-0.255167
YDR456W	-0.963727	-0.255311
YNL080C	-0.504476	-0.256324
YGL181W	-0.64249	-0.256768
YDR462W	-0.733938	-0.257319
YKR014C	-0.329208	-0.257382
YLR380W	-0.526905	-0.257415
YLR382C	-0.870434	-0.258175
YIL128W	-0.33574	-0.259394
YDR511W	-0.48428	-0.259643
YHR049W	-0.18698	-0.260206
YPL191C	-0.623847	-0.260633
YDR311W	-0.473941	-0.260639
YGR250C	-0.0559144	-0.260849
YDL117W	-0.502178	-0.26107
YCL073C	1.0741	-0.261272
YMR104C	-0.585876	-0.261414
YDL159W	-0.329754	-0.261511
YLL023C	-0.591209	-0.26179
YBR061C	-0.273003	-0.261968
YKL068W	-0.531942	-0.262543
YDR191W	-0.295379	-0.262565
YOR230W	-0.235415	-0.262582
YNL256W	-0.306403	-0.263319
YPR063C	-0.406815	-0.263665
YML024W	-0.603422	-0.263729
YOR269W	-0.711418	-0.264139
YKR092C	-0.507388	-0.264682
YER043C	-0.303626	-0.264794
YML109W	-0.344866	-0.264806
YBR214W	-0.585116	-0.265225
YFL048C	-0.549524	-0.265441
YGL114W	-0.490475	-0.266551
YMR197C	-0.684534	-0.266574
YGR135W	-0.476867	-0.267086
YIL040W	-0.390337	-0.267304
YLR461W	-0.500242	-0.267409
YPL049C	-0.553374	-0.267576
YOR069W	-0.393244	-0.267819
YAL012W	-0.525536	-0.26784
YDL235C	-0.545078	-0.268319
YFL034C-B	-0.625701	-0.26919
YLR025W	-0.457844	-0.269663
YOR160W	-0.49847	-0.269771
YIL090W	-0.379928	-0.269819
YAL003W	-0.508463	-0.269852
YLR295C	-0.494544	-0.269903
YPL274W	-0.693119	-0.27002
YGL038C	-0.695333	-0.270205
YGR231C	-0.7158	-0.270325
YOL020W	-0.699621	-0.270429
YIL005W	-0.477629	-0.270517
YKR025W	-0.398611	-0.270679
YPL042C	-0.549824	-0.271202
YIL030C	-0.39439	-0.271819
YPR051W	-0.489095	-0.272069
YMR244C-A	-0.373373	-0.272252
YKR058W	-0.343311	-0.272324
YDL245C	-0.301285	-0.272408
YMR152W	-0.385115	-0.272859
YOR026W	-0.338037	-0.272973
YHR016C	-0.461695	-0.273031
YKR059W	-0.261902	-0.273228
YAL049C	-0.486895	-0.273278
YPR201W	-0.396257	-0.27336
YKR062W	-0.408114	-0.273423
YJL019W	-0.327043	-0.27344
YDR009W	-0.215461	-0.273532
YML031W	-0.492744	-0.273617
YJR074W	-0.374748	-0.273812
YBR255C-A	-0.26313	-0.273877
YBR164C	-0.282732	-0.274121
YNR054C	-0.380618	-0.27443
YMR218C	-0.507649	-0.274905
YLR066W	-0.545799	-0.274946
YKL101W	-0.860149	-0.275214
YPL008W	-0.172726	-0.275361
YER058W	-0.451523	-0.27565
YLR077W	-0.481924	-0.27591
YBR163W	-0.555353	-0.276164
YLR072W	-0.224724	-0.276218
YOR332W	-0.49839	-0.276309
YMR112C	-0.495701	-0.276536
YPL096C-A	-0.316631	-0.276601
YLR201C	-0.48437	-0.276695
YML026C	-0.446981	-0.276756
YPR029C	-0.327918	-0.276787
YBR049C	-0.480797	-0.277017
YJR098C	-0.308695	-0.277145
YDR282C	-0.449174	-0.277557
YLR448W	-0.545867	-0.277561
YHL039W	-0.405085	-0.277604
YDR339C	-0.534059	-0.278167
YLR257W	-0.258324	-0.279366
YPL236C	-0.522024	-0.279418
YDR248C	-0.645215	-0.279654
YML084W	-0.160626	-0.279988
YGR132C	-0.548669	-0.280629
YNR039C	-0.602967	-0.280641
YDL243C	-0.285282	-0.281435
YLR047C	-0.324876	-0.281922
YML060W	-0.54607	-0.282273
YDR280W	-0.484743	-0.282798
YLR234W	-0.247167	-0.283064
YGL187C	-0.90705	-0.28344
YJL103C	-0.321842	-0.283449
YGR283C	-0.476307	-0.283526
YDR367W	-0.574396	-0.28377
YJR135W-A	-0.410444	-0.283778
YOR370C	-0.442171	-0.283918
YDL164C	-0.225499	-0.283995
YGR173W	-0.373676	-0.284034
YCL026C-B	-0.592438	-0.284194
YJR151C	-0.334426	-0.284392
YLR444C	-0.529793	-0.284778
YBR007C	-0.284099	-0.284954
YML064C	-0.519643	-0.284987
YMR150C	-0.258741	-0.285226
YOR078W	-0.355734	-0.285449
YER075C	-0.491883	-0.285492
YMR059W	-0.425034	-0.286155
YGL220W	-0.518083	-0.286551
YDR189W	-0.376538	-0.287006
YOL056W	-0.274342	-0.287146
YBR204C	-0.464813	-0.28746
YGL237C	-0.516444	-0.287601
YKR081C	-0.388048	-0.288774
YPR059C	-0.101965	-0.288819
YJR111C	-0.316635	-0.28915
YGL008C	-0.297725	-0.28919
YNL061W	-0.462968	-0.289263
YLR162W	-0.826632	-0.289503
YIL010W	-0.512565	-0.289582
YOL148C	-0.348454	-0.289583
YDR320C-A	-0.853155	-0.289866
YKL094W	-0.710834	-0.290483
YOR014W	-0.522467	-0.29206
YOR233W	-0.578041	-0.292098
YJL049W	-0.418643	-0.292462
YMR009W	-0.283788	-0.292791
YMR235C	-0.306805	-0.294317
YOR312C	-0.469869	-0.294597
YKR042W	-0.332108	-0.294719
YCR069W	-0.278804	-0.294829
YNL072W	-0.432754	-0.294919
YGL167C	-0.441337	-0.294931
YDR079W	-0.626215	-0.295547
YNL037C	-0.813545	-0.295966
YER078C	-0.497821	-0.296145
YGR125W	-0.55357	-0.297098
YPL045W	-0.474485	-0.29725
YMR121C	-0.456062	-0.297454
YJL156C	-0.612617	-0.297627
YPR181C	-0.344488	-0.297664
YDR299W	-0.430369	-0.297692
YGR011W	-0.349355	-0.297696
YDL027C	-0.474666	-0.297854
YKL017C	-0.274793	-0.29788
YJR148W	-0.400235	-0.298308
YKR095W-A	-0.560164	-0.298353
YDL081C	-0.762266	-0.298783
YOL077C	-0.937416	-0.298981
YMR288W	-0.419681	-0.299022
YLR398C	-0.432023	-0.299543
YOR181W	-0.60687	-0.299621
YML106W	-0.505449	-0.299856
YML009C	-0.516184	-0.299936
YLR340W	-0.298895	-0.300023
YDR119W	-0.220007	-0.300352
YPR187W	-0.779172	-0.300403
YGR084C	-0.542033	-0.300434
YJR075W	-0.548616	-0.300848
YHR102W	-0.406534	-0.301799
YML081W	-0.419496	-0.301947
YJL173C	-0.372796	-0.302037
YIR003W	-0.494337	-0.30228
YNR010W	-0.378633	-0.302678
YGR286C	-0.152326	-0.302712
YHL019C	-0.531581	-0.303021
YGR025W	-0.507421	-0.303085
YOR251C	-0.354969	-0.303374
YLR390W	-0.712493	-0.303938
YPL178W	-0.531919	-0.304067
YLR214W	-0.442645	-0.304572
YEL044W	-0.369331	-0.304604
YLR321C	-0.447796	-0.305035
YIL135C	-0.738914	-0.305287
YAR031W	-0.366082	-0.305426
YER048C	-0.533137	-0.305695
YDL047W	-0.616443	-0.306092
YOR195W	-0.81693	-0.306182
YGR012W	-0.391657	-0.306207
YER003C	-0.957889	-0.306239
YOL007C	-0.486575	-0.306256
YOR309C	-0.481925	-0.306354
YPL103C	-0.555182	-0.306539
YHR183W	-0.624153	-0.306598
YOR058C	-0.35397	-0.306805
YOR008C	-0.357436	-0.307155
YDR049W	-0.603018	-0.307443
YJR094C	-0.553668	-0.307487
YBR002C	-0.445569	-0.307665
YLR206W	-0.440527	-0.307914
YPR137W	-0.337835	-0.308141
YNR063W	-0.296945	-0.30836
YHR039C-B	-0.664281	-0.308542
YPL099C	-0.465163	-0.308825
YNL276C	-0.458115	-0.309109
YJL203W	-0.372521	-0.30921
YLR330W	-0.610357	-0.309336
YML073C	-0.504263	-0.309499
YPR089W	-0.513208	-0.309515
YNL122C	-0.599908	-0.309654
YLR186W	-0.3223	-0.309669
YDR173C	-0.428495	-0.309887
YPL183C	-0.388368	-0.310018
YLR429W	-0.611094	-0.31048
YER148W	-0.613446	-0.310611
YNR016C	-0.319522	-0.310803
YLR269C	-0.538444	-0.31094
YOR136W	-0.937822	-0.310954
YKL148C	-0.471614	-0.311091
YKL004W	-0.490667	-0.311244
YOR173W	-0.564813	-0.311864
YLR018C	-0.435948	-0.311866
YBR256C	-0.221597	-0.312195
YFL013C	-0.211024	-0.312258
YOR355W	-0.632075	-0.312362
YKR036C	-0.487449	-0.312446
YLR145W	-0.355236	-0.312495
YPL132W	-0.799639	-0.312549
YGR063C	-0.41675	-0.312588
YJR153W	-0.507166	-0.312872
YGL143C	-0.209246	-0.3133
YLR259C	-0.196704	-0.31331
YDL113C	-0.981331	-0.313411
YPL196W	-0.53882	-0.313879
YMR062C	0.113403	-0.314124
YIL122W	-0.459936	-0.314176
YOL008W	-0.245804	-0.314684
YGR195W	-0.466508	-0.314925
YOR006C	-0.400732	-0.314971
YOR368W	-0.638141	-0.315153
[truncated: 2,500 more rows]

## Sheet: Figure 2B
FC HL>1.5					UPF targets
ORF name	Ratio SR (upf1/wt)	Ratio RA (upf1/wt)	Ratio HL (upf1/wt)		ORF name	Ratio SR (upf1/wt)	Ratio RA (upf1/wt)	Ratio HL (upf1/wt)
YAL002W	0.92761	2.42355	2.60686		YAL002W	0.92761	2.42355	2.60686
YAL014C	0.952127	2.74049	2.87186		YAL014C	0.952127	2.74049	2.87186
YAL065C	1.01362	3.05432	3.00655		YAL028W	1.11454	1.83851	1.6459
YAR020C	1.00492	2.04906	2.03448		YAL065C	1.01362	3.05432	3.00655
YAR050W	0.890892	4.50891	5.04984		YAR020C	1.00492	2.04906	2.03448
YBL005W	1.00362	3.34285	3.32338		YAR023C	1.11569	1.43229	1.28091
YBL060W	1.05426	2.31403	2.19003		YAR029W	0.8782	1.36352	1.54917
YBL071C	0.911947	1.85469	2.02924		YBL025W	0.95315	1.5914	1.6659
YBL071W-A	0.684118	3.68008	5.36732		YBL060W	1.05426	2.31403	2.19003
YBR008C	1.01241	5.07343	5.00009		YBL071W-A	0.684118	3.68008	5.36732
YBR043C	1.02005	2.45039	2.39686		YBL088C	1.13199	2.0162	1.77715
YBR071W	0.980776	1.96405	1.99808		YBR008C	1.01241	5.07343	5.00009
YBR141C	1.02578	2.21335	2.15291		YBR030W	0.849089	1.63695	1.92359
YBR157C	0.822997	1.986	2.40775		YBR033W	1.0207	1.03017	1.00703
YBR186W	0.916292	2.23838	2.43743		YBR043C	1.02005	2.45039	2.39686
YBR197C	1.00643	2.561	2.53896		YBR045C	1.174	0.954334	0.811075
YBR217W	0.896907	3.54208	3.94041		YBR050C	1.31467	1.90169	1.44329
YBR291C	1.11264	2.78958	2.50158		YBR055C	1.09227	1.64645	1.504
YBR298C	1.01262	4.01105	3.95223		YBR062C	1.01772	1.44914	1.42073
YBR301W	0.9592	2.62344	2.72893		YBR063C	1.2244	2.01627	1.64308
YCL002C	0.815773	2.29915	2.81209		YBR084C-A	0.953015	0.873652	0.91468
YCL004W	1.04021	2.40099	2.30304		YBR098W	0.799498	0.473136	0.590472
YCL011C	0.769354	2.57002	3.33304		YBR111W-A	0.94753	1.04313	1.09843
YCL014W	0.841309	2.77864	3.29539		YBR163W	0.917345	0.978317	1.06409
YCL056C	1.03081	2.44581	2.36741		YBR174C	0.741042	1.41045	1.89909
YCL067C	0.866556	2.85121	3.28294		YBR184W	1.03965	0.714566	0.685784
YCL075W	0.597936	1.31904	2.20107		YBR189W	1.00998	0.96807	0.95637
YCR007C	0.984896	2.54744	2.58073		YBR191W	0.998291	1.02042	1.01989
YCR014C	0.892498	2.50405	2.79941		YBR197C	1.00643	2.561	2.53896
YCR020C	1.12902	5.80221	5.12768		YBR208C	0.928153	1.20868	1.29934
YCR020W-B	1.0399	3.816	3.6614		YBR216C	1.0279	0.962602	0.934389
YCR039C	0.859608	2.56378	2.97585		YBR217W	0.896907	3.54208	3.94041
YCR044C	0.707845	1.40109	1.97496		YBR237W	1.00625	1.47826	1.4658
YCR104W	1.02769	2.76929	2.68866		YBR250W	0.92084	1.19151	1.29105
YCR107W	0.910941	2.7424	3.0038		YBR278W	1.06627	1.82444	1.70723
YDL055C	1.19063	2.77061	2.32183		YBR291C	1.11264	2.78958	2.50158
YDL079C	0.952945	3.15012	3.2983		YBR298C	1.01262	4.01105	3.95223
YDL115C	0.887738	3.94011	4.42847		YCL004W	1.04021	2.40099	2.30304
YDL154W	0.9404	3.5146	3.72901		YCL011C	0.769354	2.57002	3.33304
YDL165W	0.948975	2.1688	2.28032		YCL016C	1.14349	2.21084	1.92911
YDL215C	0.907182	3.63687	4.00004		YCL056C	1.03081	2.44581	2.36741
YDL231C	1.0427	3.06847	2.93625		YCL067C	0.866556	2.85121	3.28294
YDR022C	0.97611	2.94594	3.01131		YCR007C	0.984896	2.54744	2.58073
YDR073W	0.851761	1.7686	2.07177		YCR014C	0.892498	2.50405	2.79941
YDR131C	1.05635	2.55612	2.41437		YCR015C	0.89292	1.14589	1.28044
YDR132C	1.03919	2.985	2.86602		YCR020C	1.12902	5.80221	5.12768
YDR133C	0.699457	1.54341	2.20166		YCR020C-A	1.02525	0.95891	0.93321
YDR147W	0.882798	2.37629	2.68577		YCR020W-B	1.0399	3.816	3.6614
YDR174W	0.835557	1.88488	2.2508		YCR028C	0.834459	1.47484	1.76348
YDR185C	0.921533	3.79694	4.11106		YCR036W	0.924014	1.09341	1.18069
YDR206W	0.961413	2.56786	2.66496		YCR037C	0.950816	0.837194	0.878537
YDR210W	0.796338	2.54922	3.19404		YCR038C	1.11955	0.495657	0.44174
YDR236C	0.965017	2.65717	2.74736		YCR039C	0.859608	2.56378	2.97585
YDR256C	0.96651	3.15216	3.25411		YCR063W	0.716072	0.522852	0.728538
YDR275W	1.19397	2.75988	2.30636		YCR091W	0.87377	1.64353	1.87677
YDR380W	0.753157	1.59423	2.11201		YCR096C	0.83832	0.971355	1.15611
YDR391C	0.929213	2.00696	2.15503		YCR102C	1.1208	1.79565	1.59855
YDR501W	1.03808	3.30111	3.17292		YCR104W	1.02769	2.76929	2.68866
YDR533C	0.860212	2.69875	3.13031		YCR107W	0.910941	2.7424	3.0038
YEL025C	1.00352	2.38348	2.36981		YDL012C	1.02566	1.22688	1.19352
YEL028W	1.04908	3.50306	3.33173		YDL033C	1.00699	0.9221	0.913654
YEL049W	1.08825	3.38323	3.10195		YDL061C	0.998893	0.94558	0.944518
YEL072W	1.00848	2.98152	2.94986		YDL109C	0.76521	1.33341	1.73866
YEL077C	0.638359	1.95021	3.04823		YDL115C	0.887738	3.94011	4.42847
YER024W	0.986073	3.54339	3.58543		YDL123W	0.925485	1.54752	1.66839
YER054C	0.8939	1.96532	2.19369		YDL130W	1.04063	1.84717	1.77109
YER065C	0.586843	1.34339	2.28408		YDL154W	0.9404	3.5146	3.72901
YER066W	1.10466	6.91068	6.24198		YDL183C	1.08454	1.06131	0.976399
YER069W	0.955831	3.10194	3.23805		YDL187C	1.17171	1.91686	1.6323
YER103W	1.11855	2.40668	2.14681		YDL191W	0.871705	0.842469	0.964306
YER115C	0.869947	2.39342	2.74509		YDL197C	0.963553	1.76716	1.82992
YER150W	1.11411	2.39883	2.14832		YDL204W	0.957483	0.863544	0.899879
YER180C	0.775441	5.96588	7.67637		YDL215C	0.907182	3.63687	4.00004
YER186C	0.979883	2.41026	2.45426		YDL216C	0.517797	0.591628	1.14004
YER188W	1.22087	4.61649	3.77289		YDL231C	1.0427	3.06847	2.93625
YFL020C	1.04996	3.82067	3.63074		YDL243C	1.1062	1.17542	1.06021
YFL026W	0.568949	1.39252	2.44208		YDL247W	1.1169	1.89042	1.68878
YFL054C	1.28142	3.14607	2.44967		YDR007W	0.91188	1.28736	1.40862
YFL057C	0.970005	2.54616	2.61904		YDR009W	1.16105	1.24048	1.06603
YFL058W	1.53083	4.10738	2.67712		YDR022C	0.97611	2.94594	3.01131
YFL059W	1.02983	2.59443	2.51365		YDR034C	1.01166	1.30616	1.28822
YFL067W	0.594345	1.32099	2.21764		YDR047W	0.888908	1.35787	1.52417
YFR014C	0.621231	1.31141	2.10628		YDR064W	0.934105	1.15615	1.23495
YFR020W	1.14367	3.74372	3.26613		YDR065W	1.00761	0.996266	0.986538
YFR022W	0.993819	4.66529	4.68384		YDR073W	0.851761	1.7686	2.07177
YFR026C	1.1283	9.35222	8.27027		YDR076W	1.10086	0.994322	0.901211
YFR055W	1.1729	2.40553	2.04636		YDR078C	1.876	3.253	1.73014
YGL054C	0.993849	2.79096	2.80197		YDR109C	1.06124	2.00629	1.88631
YGL096W	0.819117	1.68236	2.04929		YDR124W	1.15031	1.46253	1.26858
YGL110C	0.583708	1.17178	2.00299		YDR125C	1.02427	1.34964	1.31473
YGL156W	1.1977	2.54578	2.12083		YDR131C	1.05635	2.55612	2.41437
YGL173C	0.949663	1.85119	1.94497		YDR133C	0.699457	1.54341	2.20166
YGL193C	0.90743	4.43797	4.87979		YDR147W	0.882798	2.37629	2.68577
YGL250W	1.18117	2.30548	1.9475		YDR174W	0.835557	1.88488	2.2508
YGL251C	1.10791	5.18476	4.66934		YDR196C	0.957234	0.977732	1.01914
YGL255W	0.834647	1.71074	2.04509		YDR206W	0.961413	2.56786	2.66496
YGL256W	0.968603	2.25425	2.32213		YDR210W	0.796338	2.54922	3.19404
YGL261C	0.943132	2.25406	2.38465		YDR236C	0.965017	2.65717	2.74736
YGL262W	2.34383	8.05696	3.42985		YDR242W	0.997345	1.10397	1.10444
YGR007W	1.01539	2.27397	2.2345		YDR252W	1.01424	1.12735	1.10904
YGR015C	0.854527	2.33369	2.72488		YDR265W	1.10361	1.02189	0.92389
YGR032W	0.944318	2.20918	2.33423		YDR273W	1.13294	1.04718	0.922239
YGR042W	1.00129	2.04804	2.04083		YDR291W	0.962462	1.39689	1.44814
YGR043C	1.16153	2.25987	1.94126		YDR318W	1.06653	0.941182	0.880501
YGR074W	0.887894	2.24659	2.52461		YDR325W	0.917485	1.27429	1.3858
YGR091W	0.469199	0.942572	2.00442		YDR332W	1.12617	1.49077	1.3208
YGR121C	0.88271	2.53883	2.86977		YDR336W	0.95724	1.3449	1.40184
YGR169C-A	0.719688	2.77888	3.85262		YDR366C	1.01458	0.732598	0.720464
YGR251W	0.8468	1.88504	2.22111		YDR369C	1.20381	1.33302	1.10487
YGR268C	0.958003	2.01311	2.09668		YDR379W	0.945699	1.1298	1.192
YGR292W	1.18775	2.48528	2.08776		YDR386W	0.866476	1.27031	1.46279
YGR294W	1.06422	3.74794	3.51392		YDR387C	1.01014	1.82444	1.8021
YHL040C	0.994224	1.98058	1.98765		YDR391C	0.929213	2.00696	2.15503
YHL046C	0.990208	2.93137	2.95376		YDR403W	1.13071	1.59643	1.40873
YHL050C	0.623527	1.86806	2.98928		YDR459C	1.12903	1.15062	1.01685
YHR022C	0.87163	5.43042	6.21629		YDR471W	0.963073	0.956036	0.99048
YHR077C	0.795544	1.57661	1.97739		YDR478W	0.954699	1.19965	1.25377
YHR096C	1.12549	3.59718	3.18899		YDR530C	0.968861	1.11492	1.14818
YHR128W	0.810708	1.6804	2.06814		YDR541C	1.05949	1.09826	1.03428
YHR134W	1.0713	2.50746	2.33537		YEL005C	1.00073	1.79713	1.79181
YHR150W	0.874224	1.77778	2.02902		YEL025C	1.00352	2.38348	2.36981
YHR153C	1.00561	2.00861	1.99295		YEL028W	1.04908	3.50306	3.33173
YHR204W	0.467945	1.2422	2.64866		YEL030C-A	0.842174	0.855971	1.01412
YHR206W	0.838716	3.28682	3.91013		YEL049W	1.08825	3.38323	3.10195
YHR209W	1.07345	3.07178	2.85523		YEL063C	1.06075	1.15947	1.09062
YHR210C	1.09992	3.22685	2.92717		YEL072W	1.00848	2.98152	2.94986
YHR211W	1.06239	4.62885	4.34729		YEL077C	0.638359	1.95021	3.04823
YIL009C-A	0.766358	2.81718	3.66787		YER015W	1.27982	2.23011	1.73864
YIL024C	1.12659	2.38878	2.11562		YER024W	0.986073	3.54339	3.58543
YIL029C	0.946244	2.24578	2.36807		YER028C	1.14856	2.08851	1.81431
YIL082W	1.09449	7.39943	6.74558		YER039C	0.977469	0.600748	0.613225
YIL083C	1.10901	2.25448	2.02835		YER041W	0.959473	0.861368	0.895749
YIL084C	0.953368	1.86318	1.94996		YER065C	0.586843	1.34339	2.28408
YIL103W	0.909951	2.51959	2.76276		YER066W	1.10466	6.91068	6.24198
YIL116W	1.03319	2.81813	2.72153		YER074W	0.905422	0.90762	1.00019
YIL120W	0.876085	2.57773	2.93576		YER092W	1.02702	1.923	1.86823
YIL136W	0.547033	1.30111	2.37318		YER103W	1.11855	2.40668	2.14681
YIL142W	1.17474	2.29509	1.94934		YER109C	0.953953	0.520711	0.544628
YIL161W	0.23645	0.466817	1.96988		YER115C	0.869947	2.39342	2.74509
YIL165C	1.03867	6.62669	6.36576		YER139C	0.926349	0.93171	1.00354
YIL167W	0.982629	3.09399	3.14167		YER173W	1.22254	1.5757	1.286
YIL173W	0.991444	3.89012	3.91494		YER180C	0.775441	5.96588	7.67637
YIL176C	1.07795	4.19346	3.88155		YER186C	0.979883	2.41026	2.45426
YIR029W	1.25615	8.96239	7.11888		YER187W	0.891437	1.06375	1.19063
YIR030W-A	1.09329	4.97477	4.54013		YER188W	1.22087	4.61649	3.77289
YIR032C	1.80343	3.89363	2.1542		YFL020C	1.04996	3.82067	3.63074
YIR042C	1.3827	4.41132	3.18326		YFL027C	0.681878	1.2928	1.89171
YJL023C	1.02185	3.74843	3.66011		YFL044C	1.04875	1.25329	1.19237
YJL024C	1.05381	3.32972	3.15266		YFL054C	1.28142	3.14607	2.44967
YJL044C	0.941541	1.97018	2.08784		YFL060C	1.09007	1.70463	1.56029
YJL064W	0.933447	3.02368	3.23204		YFR005C	1.03137	1.29194	1.24985
YJL065C	1.00628	1.96453	1.94791		YFR008W	1.03557	0.837747	0.807168
YJL116C	1.2116	6.28157	5.17296		YFR020W	1.14367	3.74372	3.26613
YJL126W	1.17303	3.68032	3.13046		YFR022W	0.993819	4.66529	4.68384
YJL216C	1.00705	2.60354	2.57954		YFR023W	0.947868	0.923402	0.972016
YJL223C	1.17782	3.77779	3.20029		YFR026C	1.1283	9.35222	8.27027
YJR008W	1.05591	4.00447	3.78398		YFR046C	1.09071	1.25239	1.14568
YJR021C	0.852504	5.44815	6.37651		YFR054C	1.03577	0.943595	0.908975
YJR028W	1.06843	2.17257	2.02889		YGL030W	0.984281	0.991723	1.00531
YJR064W	0.742305	2.35543	3.16606		YGL069C	1.0124	0.717227	0.70686
YJR082C	0.908024	1.76604	1.94059		YGL096W	0.819117	1.68236	2.04929
YJR091C	0.916138	1.8632	2.02922		YGL098W	1.00251	0.942034	0.93758
YJR102C	0.988696	2.37977	2.40161		YGL103W	0.736375	1.19936	1.62511
YJR124C	0.889427	1.89241	2.12293		YGL124C	0.862685	1.10582	1.27898
YJR149W	1.00527	2.21116	2.19465		YGL136C	1.13593	0.895445	0.786536
YJR155W	0.865154	5.88864	6.79129		YGL146C	1.19228	1.09674	0.917812
YKL033W	0.993113	2.69236	2.70499		YGL154C	1.00756	1.35796	1.34476
YKL051W	0.963547	2.04934	2.12213		YGL193C	0.90743	4.43797	4.87979
YKL098W	0.944584	2.1055	2.22405		YGL212W	1.01243	1.17112	1.15417
YKL138C-A	1.06206	2.21408	2.08006		YGL223C	0.951124	1.50491	1.57872
YKL163W	0.947523	2.06624	2.17581		YGL243W	0.937545	1.62995	1.73465
YKL187C	1.07626	3.47154	3.21835		YGL251C	1.10791	5.18476	4.66934
YKL188C	1.03254	2.95727	2.8577		YGL256W	0.968603	2.25425	2.32213
YKL199C	0.888651	2.01293	2.2601		YGL259W	2.30889	1.22619	0.52989
YKL224C	0.945902	2.3074	2.43393		YGR003W	1.15579	1.33881	1.15577
YKR022C	1.05099	2.32184	2.20426		YGR015C	0.854527	2.33369	2.72488
YKR053C	1.08204	2.97491	2.74323		YGR016W	1.25132	1.51824	1.21061
YKR061W	0.783023	1.85472	2.36339		YGR024C	1.02528	1.78308	1.73524
YKR091W	1.1563	2.81637	2.43024		YGR039W	1.01079	0.679761	0.671008
YKR104W	1.26967	5.96521	4.68777		YGR040W	0.824342	0.699795	0.847021
YKR105C	0.955734	3.30592	3.45133		YGR042W	1.00129	2.04804	2.04083
YLL005C	0.955561	2.04481	2.13514		YGR043C	1.16153	2.25987	1.94126
YLL056C	1.07547	4.90474	4.55037		YGR133W	1.13888	2.10899	1.84769
YLL063C	1.17654	3.52603	2.99027		YGR148C	0.946489	0.940655	0.991621
YLL064C	1.02028	2.9996	2.93341		YGR154C	1.1745	1.98538	1.68663
YLR010C	1.08929	2.20287	2.01779		YGR168C	0.903445	1.19399	1.31865
YLR030W	0.891119	2.45237	2.74587		YGR194C	0.837818	0.469033	0.558578
YLR046C	0.932744	1.9774	2.11526		YGR210C	0.918349	1.6754	1.8203
YLR085C	1.09117	2.35481	2.15324		YGR222W	1.15759	1.42687	1.22988
YLR091W	0.961738	2.75086	2.85392		YGR238C	0.843109	0.915788	1.08378
YLR097C	0.936408	2.03338	2.16663		YGR256W	1.28289	1.3107	1.0194
YLR126C	0.991815	2.39648	2.41087		YGR263C	1.11126	1.28658	1.15519
YLR128W	0.958583	2.08167	2.16677		YGR268C	0.958003	2.01311	2.09668
YLR130C	0.922887	2.7627	2.98687		YGR270W	0.950196	1.38388	1.45317
YLR137W	0.985041	1.96376	1.98914		YGR292W	1.18775	2.48528	2.08776
YLR165C	0.968933	2.71464	2.79543		YGR294W	1.06422	3.74794	3.51392
YLR171W	1.19527	2.34368	1.95643		YHL016C	1.32635	2.18428	1.64316
YLR211C	1.0661	2.53438	2.37196		YHL026C	0.933477	1.27893	1.36702
YLR251W	0.880612	3.41228	3.86626		YHL032C	0.973919	1.26948	1.30057
YLR263W	0.91033	2.14895	2.35536		YHL040C	0.994224	1.98058	1.98765
YLR265C	0.930599	1.85718	1.99123		YHL047C	1.00412	1.3492	1.34066
YLR271W	0.954226	1.85639	1.9411		YHL050C	0.623527	1.86806	2.98928
YLR284C	1.00142	2.00002	1.99274		YHR015W	1.21759	1.19059	0.975644
YLR288C	0.953845	2.24856	2.35211		YHR022C	0.87163	5.43042	6.21629
YLR306W	1.0037	2.71779	2.70172		YHR044C	1.04332	1.45332	1.38988
YLR377C	1.02026	3.87072	3.7854		YHR075C	1.01178	1.0278	1.01357
YLR446W	0.982174	3.49753	3.55307		YHR134W	1.0713	2.50746	2.33537
YLR457C	0.972219	1.92834	1.97902		YHR150W	0.874224	1.77778	2.02902
YML019W	0.868714	1.72331	1.97933		YHR153C	1.00561	2.00861	1.99295
YML066C	1.04248	2.91627	2.7912		YHR156C	1.51105	2.33746	1.54347
YML068W	1.11464	2.2112	1.97936		YHR180W	1.16949	1.89209	1.61427
YML093W	0.687035	2.14237	3.11134		YHR204W	0.467945	1.2422	2.64866
YML098W	0.98427	2.09586	2.12461		YHR210C	1.09992	3.22685	2.92717
YML099W-A	1.0954	3.27214	2.98049		YHR211W	1.06239	4.62885	4.34729
YML107C	1.00827	2.49203	2.46608		YIL003W	0.995473	1.84858	1.85285
YML116W	1.0261	2.25814	2.1958		YIL009C-A	0.766358	2.81718	3.66787
YML121W	0.635042	1.26455	1.98685		YIL013C	0.843494	1.49067	1.76332
YMR018W	1.09995	2.15013	1.9504		YIL024C	1.12659	2.38878	2.11562
YMR023C	0.990904	1.94921	1.96272		YIL029C	0.946244	2.24578	2.36807
YMR028W	1.10421	2.34758	2.12129		YIL059C	1.10558	1.22522	1.10575
YMR037C	0.667073	1.3766	2.05904		YIL061C	1.05881	0.869671	0.819534
YMR040W	1.10623	2.38163	2.14812		YIL089W	1.06672	1.92533	1.80089
YMR051C	0.964936	2.06813	2.1385		YIL120W	0.876085	2.57773	2.93576
YMR080C	0.179601	0.692042	3.84462		YIL139C	1.03264	1.45923	1.40996
YMR081C	0.695733	2.68385	3.84898		YIL165C	1.03867	6.62669	6.36576
YMR090W	1.00867	3.67336	3.63366		YIL167W	0.982629	3.09399	3.14167
YMR110C	0.973285	1.89761	1.94535		YIL173W	0.991444	3.89012	3.91494
YMR114C	0.935851	2.82138	3.00805		YIL176C	1.07795	4.19346	3.88155
YMR155W	1.0434	2.40694	2.30168		YIR007W	0.945517	0.889604	0.938767
YMR169C	1.11396	3.19719	2.86371		YIR029W	1.25615	8.96239	7.11888
YMR180C	1.02214	3.16522	3.08977		YIR042C	1.3827	4.41132	3.18326
YMR253C	0.8671	2.03058	2.33659		YIR043C	1.34151	0.25134	0.186939
YMR271C	1.08193	2.24172	2.06735		YJL001W	1.04303	0.942084	0.901207
YMR290W-A	0.827961	1.88811	2.27535		YJL004C	0.984812	0.88619	0.897851
YMR316W	1.11557	3.62391	3.24124		YJL023C	1.02185	3.74843	3.66011
YNL013C	0.888724	2.04234	2.29294		YJL044C	0.941541	1.97018	2.08784
YNL014W	1.05739	2.87298	2.71098		YJL057C	1.11402	1.32974	1.19098
YNL046W	0.847901	2.52629	2.97282		YJL065C	1.00628	1.96453	1.94791
YNL095C	0.939089	3.36546	3.57576		YJL106W	0.895849	1.07024	1.19201
YNL142W	1.05496	2.91528	2.75724		YJL126W	1.17303	3.68032	3.13046
YNL162W-A	0.984869	3.78131	3.83085		YJL216C	1.00705	2.60354	2.57954
YNL257C	0.751585	1.81106	2.40428		YJL223C	1.17782	3.77779	3.20029
YNL279W	0.934881	2.058	2.19645		YJR003C	0.977464	1.71349	1.74909
YNL289W	0.567	1.40669	2.4754		YJR004C	1.06414	1.28208	1.20212
YNL329C	1.0416	2.68402	2.57107		YJR008W	1.05591	4.00447	3.78398
YNR002C	0.912721	3.22097	3.52111		YJR021C	0.852504	5.44815	6.37651
YNR011C	1.04683	2.26736	2.16109		YJR036C	0.940548	0.757342	0.803417
YNR056C	1.07614	2.75465	2.55404		YJR039W	1.15404	2.08429	1.80206
YNR059W	1.00342	4.20056	4.17692		YJR082C	0.908024	1.76604	1.94059
YNR065C	0.779947	2.31859	2.96613		YJR108W	0.867993	0.88342	1.0155
YNR076W	1.03989	3.57465	3.42985		YJR127C	1.2049	1.45911	1.20828
YOL014W	1.00648	6.38142	6.32621		YJR135C	0.836481	0.822216	0.980754
YOL055C	1.134	2.42272	2.13167		YJR149W	1.00527	2.21116	2.19465
YOL068C	0.975881	1.93538	1.97879		YJR151C	1.06915	1.13373	1.05804
YOL112W	0.949581	2.46207	2.58701		YJR153W	0.948502	0.986131	1.03735
YOL133W	0.91561	2.97187	3.23855		YJR155W	0.865154	5.88864	6.79129
YOL154W	0.890517	4.07166	4.56205		YJR159W	1.31726	1.93797	1.46793
YOL156W	1.09328	2.75402	2.51343		YKL011C	1.06503	1.37207	1.28542
YOL161C	0.863067	3.20917	3.71005		YKL017C	1.11427	1.17058	1.04819
YOL164W	1.13373	4.90042	4.31274		YKL019W	1.01048	1.6869	1.66568
YOL165C	1.10358	2.47907	2.24138		YKL026C	0.941326	1.79161	1.89904
YOR013W	0.864996	1.71172	1.97447		YKL033W	0.993113	2.69236	2.70499
YOR019W	1.07483	2.16013	2.00526		YKL050C	1.2155	1.03688	0.851147
YOR071C	0.938558	1.97203	2.09644		YKL098W	0.944584	2.1055	2.22405
YOR120W	0.973021	2.24402	2.3011		YKL132C	1.16823	1.19534	1.02093
YOR152C	0.918193	1.97977	2.15135		YKL138C-A	1.06206	2.21408	2.08006
YOR178C	1.01409	3.83067	3.76901		YKL149C	0.91578	1.36987	1.49252
YOR179C	0.841211	1.9091	2.26441		YKL168C	0.983295	0.869315	0.882113
YOR192C	0.979713	2.07146	2.10964		YKL177W	0.82441	0.910834	1.10237
YOR206W	0.637777	1.38888	2.17283		YKL186C	0.959158	1.12436	1.16963
YOR283W	0.938897	1.88458	2.00275		YKL187C	1.07626	3.47154	3.21835
YOR304C-A	0.774925	4.36463	5.61977		YKL188C	1.03254	2.95727	2.8577
YOR305W	0.898333	2.77094	3.07766		YKL197C	0.975475	0.912557	0.933414
YOR311C	0.34678	0.878336	2.52719		YKL220C	2.60516	3.21155	1.23001
YOR340C	0.701633	1.45091	2.06329		YKL222C	0.946444	1.4028	1.47887
YOR365C	0.866203	2.13518	2.45949		YKR004C	1.09585	1.34245	1.2223
YOR385W	0.731695	1.83564	2.50315		YKR005C	1.01474	0.942772	0.927002
YOR386W	0.902521	2.79808	3.09338		YKR012C	0.943427	1.80069	1.90441
YOR389W	1.23917	2.78121	2.23942		YKR019C	1.1305	1.57575	1.39075
YPL064C	1.08144	2.74114	2.52906		YKR020W	1.11928	0.876967	0.781766
YPL077C	0.963896	2.357	2.43983		YKR022C	1.05099	2.32184	2.20426
YPL149W	1.03355	2.76254	2.66691		YKR027W	1.04744	1.23237	1.17393
YPL175W	0.499521	1.29145	2.5796		YKR041W	1.15357	1.17683	1.01789
YPL189W	1.42771	2.77366	1.93841		YKR058W	1.06259	1.13623	1.06692
YPL198W	0.474226	1.32295	2.78348		YKR061W	0.783023	1.85472	2.36339
YPL232W	0.896187	1.84326	2.0522		YKR070W	1.12859	1.46773	1.2976
YPL258C	1.13529	2.93509	2.57956		YKR087C	0.974024	1.49984	1.5364
YPL276W	0.725585	1.42933	1.96551		YKR101W	1.09722	1.29644	1.17893
YPR032W	0.456285	0.916365	2.00384		YKR104W	1.26967	5.96521	4.68777
YPR070W	0.825684	1.60898	1.94432		YLL003W	0.971388	1.58903	1.63219
YPR114W	0.828575	2.00263	2.41157		YLL017W	0.954294	1.0683	1.11697
YPR121W	0.965783	2.66775	2.75611		YLL025W	1.32084	2.10569	1.59065
YPR144C	0.670147	1.52898	2.27648		YLL038C	0.92458	1.62619	1.75492
YPR149W	0.357597	0.989873	2.76196		YLL051C	0.818624	0.94757	1.15493
YPR167C	1.00193	2.42028	2.41023		YLL056C	1.07547	4.90474	4.55037
YPR168W	0.83255	1.83629	2.2007		YLL063C	1.17654	3.52603	2.99027
					YLR010C	1.08929	2.20287	2.01779
					YLR016C	1.1086	1.47393	1.32658
					YLR030W	0.891119	2.45237	2.74587
					YLR031W	1.13895	0.923703	0.809202
					YLR036C	1.12111	1.77225	1.57727
					YLR037C	1.12236	1.47177	1.3084
					YLR046C	0.932744	1.9774	2.11526
					YLR047C	1.07625	1.14321	1.05985
					YLR061W	1.07393	1.09123	1.01384
					YLR085C	1.09117	2.35481	2.15324
					YLR097C	0.936408	2.03338	2.16663
					YLR105C	1.13665	1.86437	1.63658
					YLR122C	0.958884	1.15662	1.20353
					YLR130C	0.922887	2.7627	2.98687
					YLR134W	1.21015	0.999099	0.823758
					YLR144C	0.813987	0.818762	1.00362
					YLR165C	0.968933	2.71464	2.79543
					YLR174W	0.889276	1.12486	1.26209
					YLR185W	0.903407	0.854604	0.94387
					YLR227C	0.967287	1.55182	1.60072
					YLR233C	0.76283	1.13911	1.48993
					YLR245C	1.0121	1.45499	1.43438
					YLR247C	0.869935	1.17568	1.34845
					YLR263W	0.91033	2.14895	2.35536
					YLR265C	0.930599	1.85718	1.99123
					YLR266C	0.848197	1.41816	1.66824
					YLR271W	0.954226	1.85639	1.9411
					YLR273C	1.07249	1.03352	0.961518
					YLR283W	1.01951	1.4714	1.44003
					YLR284C	1.00142	2.00002	1.99274
					YLR288C	0.953845	2.24856	2.35211
					YLR306W	1.0037	2.71779	2.70172
					YLR317W	0.955034	1.31651	1.37542
					YLR333C	0.859534	0.937998	1.08885
					YLR343W	1.70712	0.884091	0.516731
					YLR363C	0.86102	1.00721	1.16718
					YLR376C	0.913755	1.50038	1.63833
					YLR381W	0.955538	1.2254	1.27956
					YLR383W	1.04106	1.63582	1.5678
					YLR384C	1.12087	1.88478	1.67779
					YLR385C	0.904229	0.540469	0.59638
					YLR393W	1.07591	1.10952	1.02894
					YLR412W	0.922646	1.09515	1.18432
					YLR426W	0.984526	1.73206	1.75536
					YLR431C	0.965955	0.9532	0.984596
					YLR453C	0.850163	1.13044	1.32671
					YLR457C	0.972219	1.92834	1.97902
					YLR460C	1.08905	0.975279	0.893538
					YLR461W	0.953066	1.0226	1.07057
					YML002W	0.90078	1.26155	1.39739
					YML003W	0.924491	1.08106	1.16675
					YML005W	1.06956	0.936496	0.87364
					YML023C	0.891608	1.37186	1.5352
					YML042W	0.927564	0.949643	1.02152
					YML050W	1.0251	1.5617	1.52006
					YML068W	1.11464	2.2112	1.97936
					YML098W	0.98427	2.09586	2.12461
					YML099C	1.00653	1.55261	1.53911
					YML104C	0.814219	1.3008	1.59404
					YML107C	1.00827	2.49203	2.46608
					YML128C	0.925462	1.44294	1.55568
					YMR018W	1.09995	2.15013	1.9504
					YMR020W	1.18092	2.12248	1.7933
					YMR023C	0.990904	1.94921	1.96272
					YMR040W	1.10623	2.38163	2.14812
					YMR063W	0.989161	0.829892	0.837115
					YMR064W	0.781479	0.932496	1.19058
					YMR065W	0.903231	1.74474	1.92736
					YMR068W	1.17844	1.44012	1.21933
					YMR086C-A	0.884042	0.798659	0.901404
					YMR090W	1.00867	3.67336	3.63366
					YMR106C	0.603866	0.893422	1.47621
					YMR114C	0.935851	2.82138	3.00805
					YMR117C	0.955098	0.60825	0.635426
					YMR135C	0.846523	1.07958	1.27247
					YMR142C	0.900144	0.892616	0.989427
					YMR154C	0.717724	1.04869	1.45787
					YMR167W	0.926863	1.58004	1.70092
					YMR169C	1.11396	3.19719	2.86371
					YMR180C	1.02214	3.16522	3.08977
					YMR187C	0.917458	1.52023	1.65331
					YMR194W	0.915561	0.897092	0.977643
					YMR232W	0.774083	0.525956	0.677942
					YMR234W	0.958597	1.49074	1.55166
					YMR242C	0.901491	0.907246	1.00414
					YMR271C	1.08193	2.24172	2.06735
					YMR283C	1.04359	1.02677	0.981685
					YMR285C	0.862894	0.793084	0.917049
					YMR316C-B	1.0583	1.89468	1.78632
					YNL004W	0.983096	1.6267	1.65098
					YNL006W	0.898725	1.21799	1.35221
					YNL008C	1.07019	1.34117	1.25042
					YNL009W	1.12198	1.54695	1.3757
					YNL011C	1.03216	1.40644	1.35958
					YNL012W	1.10925	2.12481	1.91128
					YNL014W	1.05739	2.87298	2.71098
					YNL018C	1.05906	1.15169	1.08504
					YNL025C	1.0514	1.33463	1.26656
					YNL043C	1.69854	1.02498	0.602102
					YNL046W	0.847901	2.52629	2.97282
					YNL063W	1.06832	1.69382	1.58196
					YNL082W	0.90618	1.44324	1.58911
					YNL094W	1.01072	1.75439	1.73192
					YNL096C	0.889264	0.787739	0.883857
					YNL128W	1.08891	0.93947	0.860837
					YNL138W-A	0.768671	0.956267	1.24128
					YNL143C	0.87742	1.02807	1.16909
					YNL158W	1.04115	1.07839	1.03346
					YNL162W	1.00658	0.937539	0.929336
					YNL162W-A	0.984869	3.78131	3.83085
					YNL205C	1.05862	1.46475	1.38056
					YNL249C	0.913498	0.657953	0.718651
					YNL254C	0.827227	0.687045	0.828688
					YNL260C	1.06356	1.71855	1.61224
					YNL261W	0.973761	1.28725	1.31899
					YNL270C	0.913177	1.64665	1.79919
					YNL276C	0.981306	1.0229	1.04006
					YNL279W	0.934881	2.058	2.19645
					YNL294C	0.89769	1.40987	1.56705
					YNL314W	1.13494	1.49336	1.31288
					YNL329C	1.0416	2.68402	2.57107
					YNR058W	1.0928	0.683414	0.623986
					YNR059W	1.00342	4.20056	4.17692
					YOL001W	1.24433	2.11754	1.69795
					YOL009C	0.906754	1.60457	1.76563
					YOL011W	1.03885	0.888452	0.853322
					YOL014W	1.00648	6.38142	6.32621
					YOL029C	1.02488	1.15536	1.1248
					YOL043C	0.924586	0.935201	1.00923
					YOL055C	1.134	2.42272	2.13167
					YOL068C	0.975881	1.93538	1.97879
					YOL091W	1.07261	1.41525	1.3165
					YOL104C	1.44194	0.943299	0.652728
					YOL108C	0.944938	1.82346	1.92541
					YOL112W	0.949581	2.46207	2.58701
					YOL133W	0.91561	2.97187	3.23855
					YOL153C	1.04826	1.31357	1.2503
					YOL154W	0.890517	4.07166	4.56205
					YOL163W	1.15483	1.14435	0.988711
					YOL164W	1.13373	4.90042	4.31274
					YOL165C	1.10358	2.47907	2.24138
					YOR005C	1.12721	1.88273	1.66652
					YOR010C	0.957318	0.985163	1.02679
					YOR019W	1.07483	2.16013	2.00526
					YOR026W	1.06648	1.13988	1.06644
					YOR060C	1.01551	0.994092	0.976729
					YOR064C	1.00379	1.61115	1.60149
					YOR080W	1.01954	1.64087	1.60582
					YOR100C	1.07319	0.940422	0.874329
					YOR120W	0.973021	2.24402	2.3011
					YOR122C	0.845195	0.84199	0.993987
					YOR128C	1.08785	0.919688	0.843532
					YOR148C	0.835095	1.18658	1.41773
					YOR152C	0.918193	1.97977	2.15135
					YOR182C	0.607277	0.77929	1.28039
					YOR192C	0.979713	2.07146	2.10964
					YOR202W	0.882613	1.14721	1.29689
					YOR205C	0.916981	1.46266	1.59152
					YOR242C	1.05273	0.79987	0.758115
					YOR304C-A	0.774925	4.36463	5.61977
					YOR305W	0.898333	2.77094	3.07766
					YOR313C	0.725113	1.03431	1.42324
					YOR319W	0.836516	1.27154	1.51665
					YOR377W	0.93152	1.08393	1.16102
					YOR383C	0.781679	1.27621	1.62901
					YOR389W	1.23917	2.78121	2.23942
					YPL008W	1.19596	1.27615	1.06468
					YPL022W	0.857929	1.1667	1.35687
					YPL064C	1.08144	2.74114	2.52906
					YPL066W	0.932291	1.50246	1.60799
					YPL068C	1.05075	1.04945	0.996542
					YPL071C	0.965445	1.46552	1.51459
					YPL072W	0.989749	0.915735	0.923156
					YPL077C	0.963896	2.357	2.43983
					YPL095C	0.973087	1.73189	1.77583
					YPL129W	0.932154	1.05194	1.12599
					YPL133C	0.873097	0.757181	0.865303
					YPL149W	1.03355	2.76254	2.66691
					YPL150W	1.01007	0.706986	0.698376
					YPL151C	0.93739	0.853896	0.908899
					YPL189W	1.42771	2.77366	1.93841
					YPL198W	0.474226	1.32295	2.78348
					YPL214C	1.13511	1.67778	1.47478
					YPL236C	0.938784	0.998926	1.06169
					YPL241C	1.37945	1.91962	1.38848
					YPL244C	1.03152	1.72219	1.66584
					YPL257W	0.948677	0.971781	1.02207
					YPL258C	1.13529	2.93509	2.57956
					YPR002W	1.07418	1.32978	1.23519
					YPR053C	0.968865	1.22265	1.25913
					YPR057W	0.972817	1.13255	1.16161
					YPR070W	0.825684	1.60898	1.94432
					YPR081C	0.990352	1.14386	1.15243
					YPR082C	0.818718	1.53286	1.86809
					YPR098C	0.942159	0.914909	0.968911
					YPR121W	0.965783	2.66775	2.75611
					YPR162C	1.01809	1.12401	1.10158
					YPR168W	0.83255	1.83629	2.2007
					YPR169W	0.928437	1.61321	1.73368
					YPR201W	1.0243	1.0945	1.06616
