# Supplementary material
Source: HighWire-hosted journal article supplement (doi:10.1101/rna.078774.121)
Supplement: Supplemental_Tables_Information.docx [file Supplemental_Tables_Information.docx]

**Supplementary Information**

**Table S1. List of the yeast strains used in this paper.**

**Table S2. Genomic data from the aneuploid mutant strains used in Figure 1A & C.**

**Table S3. Genomic data from the aneuploid strains used in Figure 1D.**

**Table S4. Genomic data from the *upf1* and BY4741 strains used in Figure 3.**
