# Supplementary material
Source: HighWire-hosted journal article supplement (doi:10.1101/rna.078774.121)
Supplement: Supplemetnal_Table_S2.xlsx [file Supplemetnal_Table_S2.xlsx]

## Sheet: SR
ORF	Gene	logFC CBP20	logFC HPR1	logFC EDC1	logFC NOT4	logFC PAT1	logFC POP2	logFC RRP47	logFC RRP6	logFC TRF5	logFC XRN1
YAL068C	PAU8	-0.854055	-1.69464	-0.226357	0.16614	1.48958	0.291617	0.507988	0.566634	-0.442247	0.728313
YAL067W-A	YAL067W-A	-0.512112	-0.613712	0.0532516	0.93647	0.991789	0.845143	0.0406752	0.427223	-0.543101	0.404793
YAL067C	SEO1	-0.937105	-2.67723	0.875279	-0.706938	1.89305	0.698415	2.27532	1.24295	0.133048	-0.649175
YAL065C	YAL065C	1.35109	-0.852843	0.285847	0.767179	0.687107	0.456665	2.33223	1.86815	-0.0305332	1.15777
YAL064W-B	YAL064W-B	0.0203946	-1.03334	0.507499	-0.056046	1.01018	0.424509	0.591974	0.793158	-0.356718	0.60791
YAL064W	YAL064W	-0.325291	-0.372807	0.432347	0.545208	1.89337	0.886988	2.02498	3.07696	-0.624758	2.51733
YAL064C-A	YAL064C-A	-0.0610176	-0.651823	-0.0184607	0.963648	0.722012	0.567223	-0.0255348	0.533245	-0.515078	0.343793
YAL063C-A	YAL063C-A	-1.05453	-2.95566	0.352062	-1.96594	1.08209	0.181845	1.02982	1.89284	-0.432333	0.63006
YAL063C	FLO9	0.606254	0.134174	0.053529	0.359434	0.805219	0.753868	1.17435	0.360564	0.418404	1.25475
YAL062W	GDH3	-0.423979	-1.76435	0.565217	-1.47518	0.86897	0.111286	-1.33616	0.660228	-0.197395	-1.77413
YAL061W	BDH2	0.269014	1.72254	-0.391373	0.606285	2.6143	2.17148	-1.16609	0.469758	0.1697	-1.21271
YAL060W	BDH1	0.362954	-0.243918	0.36411	-0.36584	0.152278	-0.101119	-0.388612	0.856245	-0.203834	0.679586
YAL059W	ECM1	-0.472061	-0.763761	0.0421597	-0.772744	-0.414327	-0.482735	-0.619629	-0.451887	-0.776303	-0.24061
YAL058W	CNE1	0.301161	-0.124315	0.0571181	-0.92244	-0.0992507	-0.174323	0.0398527	0.0926312	0.164605	-0.258807
YAL056W	GPB2	-0.109351	0.141362	-0.0184645	0.19431	-0.169883	-0.436258	-0.0785674	0.0162848	0.0992758	-0.541119
YAL055W	PEX22	-0.299145	-0.252964	0.0477414	-0.539632	0.388955	-0.363593	-0.556986	-0.0956292	-0.390291	-0.0777921
YAL054C	ACS1	0.320684	-0.224619	0.16409	-0.159792	0.23317	0.704676	-0.0780877	0.865589	-0.0554475	0.205776
YAL053W	FLC2	0.9963	1.36632	0.145479	0.823867	-0.584647	0.275522	0.957746	0.171691	0.952767	0.0832341
YAL051W	OAF1	0.25272	0.228646	0.0424353	-0.638134	-0.660056	-0.441903	0.058687	-0.344175	0.236053	-0.256672
YAL049C	AIM2	-0.0717596	-0.122446	-0.0396257	-0.360848	-0.0662246	-0.0748418	-0.220385	-0.0877957	-0.020932	-0.0222647
YAL048C	GEM1	0.462502	0.294314	-0.226537	0.973881	0.368246	0.475	0.522534	0.237785	0.340731	-0.782491
YAL047C	SPC72	-0.139044	0.13664	0.0329945	-0.515129	-0.24356	-0.368829	-0.00456337	0.0316747	-0.0523321	-0.11325
YAL046C	AIM1	-0.694187	-1.28261	0.0211377	0.0768021	0.684509	0.20953	-0.861697	-0.0878462	-0.89059	0.321333
YAL044W-A	YAL044W-A	-0.472036	-1.00087	0.0729246	0.100712	0.613075	0.379221	-0.769425	0.258723	-0.832923	0.422609
YAL044C	GCV3	-0.38246	-0.648591	0.402964	0.395969	0.0477516	-0.325676	-0.0911894	0.284707	-0.404843	1.06844
YAL043C	PTA1	0.255479	0.317391	-0.141265	0.00889599	-0.323966	-0.199505	0.315309	0.0906231	0.199513	-0.325089
YAL042W	ERV46	0.500144	0.271688	0.0696233	-0.560525	0.0386243	-0.00775056	0.0103189	-0.274957	0.25225	-0.398932
YAL041W	CDC24	-0.0524401	-0.0741179	-0.101322	0.142636	-0.59021	-0.285439	0.160499	-0.285306	0.127095	-0.338054
YAL040C	CLN3	0.505977	0.358575	-0.390008	1.21928	-0.654874	0.304942	0.394611	-0.472341	-0.037985	0.0920063
YAL039C	CYC3	0.532488	-0.425628	0.563544	0.376677	0.00998985	0.402365	-0.301449	0.348508	-0.348473	0.49913
YAL038W	CDC19	-0.187078	-0.783664	-0.0618707	0.315332	-0.206561	0.136948	-0.187117	-0.110088	-0.299213	-0.351512
YAL037W	YAL037W	-0.450355	-1.05873	0.0748731	-0.100901	0.985745	0.407504	-0.106042	0.741105	-0.455373	0.107226
YAL037C-A	YAL037C-A	-0.871904	-0.991349	-0.0407568	1.20766	1.18071	0.934057	-0.57184	0.60963	-1.07581	0.605597
YAL036C	RBG1	-0.210001	-0.42971	0.12171	-0.396104	-0.516451	-0.485908	-0.0761967	0.0462068	-0.316772	-0.0692277
YAL035W	FUN12	0.180454	-0.0841718	-0.121618	0.0399584	-0.699046	-0.182111	0.166706	-0.463549	0.100757	-0.605556
YAL034W-A	MTW1	-0.0982435	0.243616	0.0670653	-0.0566672	-0.0838678	-0.0413559	-0.734481	-0.493968	-0.552216	0.321425
YAL034C	FUN19	-0.172837	0.217237	-0.0359997	0.213478	0.241498	0.49409	-0.123355	-0.0459265	-0.138785	0.424452
YAL033W	POP5	-0.532322	-0.79498	-0.000225334	-0.42311	-0.0748676	-0.419863	-0.413938	0.291248	-0.913653	0.10712
YAL032C	PRP45	-0.135658	-0.34289	-0.0255629	-0.363417	-0.0791276	0.585012	-0.241937	-0.202352	-0.199393	0.268181
YAL031C	GIP4	0.202078	0.156524	-0.128163	-0.163873	-0.188776	-0.0986296	0.213064	-0.126483	0.164097	-0.182569
YAL030W	SNC1	-1.18324	-0.771002	-0.115856	0.106656	0.910925	0.268114	-1.09455	0.3919	-0.701713	0.106365
YAL029C	MYO4	0.185569	-0.063032	-0.0536084	-0.00354414	-0.564915	-0.407767	0.124766	-0.424603	0.14918	-0.395504
YAL028W	FRT2	-0.293652	0.216663	0.0932289	0.147122	1.17034	0.207965	-0.345176	0.910125	-0.458861	0.790895
YAL027W	SAW1	-0.392575	-0.224461	0.0847546	-0.534757	0.353721	-0.0812949	-0.366695	0.308002	-0.514994	0.357178
YAL026C	DRS2	0.24906	0.349598	0.0928749	0.0492712	0.0271781	-0.177374	0.692868	-0.351071	0.667746	-0.462383
YAL025C	MAK16	-0.320301	-0.404791	-0.0504901	-0.501269	-0.578097	-0.61738	-0.33497	-0.516404	-0.547991	-0.072432
YAL024C	LTE1	0.299907	0.0391267	-0.220975	-0.152464	-0.485618	-0.287186	-0.0568238	-0.29553	-0.0244184	-0.727251
YAL023C	PMT2	0.703689	0.598325	-0.148274	-0.728464	-0.468739	-0.181074	0.536262	-0.558293	0.655863	-0.713085
YAL022C	FUN26	0.27148	0.224387	-0.015881	-0.20277	-0.243148	-0.0170793	0.41703	0.0902197	0.325655	-0.273837
YAL021C	CCR4	0.613002	0.0916502	-0.272255	-0.0166382	-0.59801	-0.328543	0.499779	-0.538805	0.434513	-0.541001
YAL020C	ATS1	-0.279673	-0.816982	0.185704	-0.763972	0.0495076	0.0266459	-0.689447	-0.144989	-0.579144	0.179983
YAL019W	FUN30	-0.199881	-0.0076884	0.0891505	-0.187382	-0.469037	-0.601694	0.34469	-0.548126	0.217966	-0.395322
YAL018C	YAL018C	-0.100117	-0.447401	-0.0370547	0.80573	0.383204	0.218321	0.253944	0.420844	-0.213756	0.00892666
YAL017W	PSK1	0.211368	0.369554	-0.000457265	0.045972	-0.0931561	0.0953823	0.337598	0.075712	0.526061	-0.226592
YAL016W	TPD3	0.155294	0.0548461	-0.09708	0.208971	-0.0275354	-0.0487467	0.218936	-0.413738	0.261542	-0.479635
YAL016C-B	YAL016C-B	-0.226669	-0.481473	-0.190759	1.99061	1.13575	0.461692	-0.626866	0.234504	-0.364198	0.783426
YAL015C	NTG1	-0.407235	-0.659976	0.249203	-0.688676	0.246567	-0.485755	-0.152426	0.463061	-0.322543	0.288402
YAL014C	SYN8	-0.1578	-0.341978	0.130486	0.0880257	0.296759	-0.0130508	-0.22744	0.116183	-0.358334	0.402523
YAL013W	DEP1	0.207582	0.161609	0.0456959	0.0777775	-0.260198	0.154103	-0.506975	-0.53223	-0.245301	0.130476
YAL012W	CYS3	-0.151984	-0.350179	0.0347937	-0.123771	-0.510324	0.0293689	0.0324428	-0.533351	-0.0611799	-0.60731
YAL011W	SWC3	0.235015	0.179113	-0.0144747	-0.0149163	0.120115	-0.000557023	-0.113285	-0.0796525	-0.0413775	-0.118176
YAL010C	MDM10	0.0874251	0.0536798	0.00988152	0.380256	0.186821	0.20385	0.0499953	0.153924	0.0269181	-0.0608019
YAL009W	SPO7	-0.0352678	-0.21529	0.00874918	-0.0939197	0.546164	0.0546193	-0.512567	0.122876	-0.288792	-0.0698969
YAL008W	FUN14	0.0029215	-0.216964	0.0713534	-0.677719	0.530322	0.213103	-0.60064	-0.297975	-0.103024	-0.657127
YAL007C	ERP2	0.0722945	-0.232948	-0.05844	-0.548473	0.160396	0.0978875	-0.508753	-0.205935	0.0524059	-0.308941
YAL005C	SSA1	-0.247426	-0.76982	-0.247284	-0.683702	-0.201014	-0.578958	0.0738268	-0.719785	0.193355	-0.914906
YAL003W	EFB1	-0.459346	-0.977216	-0.099429	0.100812	0.100907	0.228812	-0.545655	-0.17826	-0.663925	-0.113438
YAL002W	VPS8	0.128499	0.00775437	-0.0411102	-0.0202308	0.200588	-0.217293	0.12793	0.211471	0.0898925	-0.377404
YAL001C	TFC3	-0.288328	0.152256	-0.0805226	0.192433	0.0607727	-0.258354	0.0549515	-0.310496	0.343508	-0.498149
YAR002C-A	ERP1	0.203622	-0.236852	0.0228795	-0.386798	0.0768362	-0.224356	-0.0503143	-0.0977122	-0.0107674	0.054791
YAR002W	NUP60	0.150139	0.0928005	-0.0465558	-0.180895	-0.386582	-0.0882657	0.0801041	-0.059036	0.0347091	-0.398211
YAR003W	SWD1	-0.0159149	-0.0258367	0.0319623	-0.395828	0.263199	0.219356	-0.141255	0.206612	-0.195939	-0.245913
YAR007C	RFA1	0.064556	0.483576	-0.151483	-0.0185218	-0.341043	-0.341435	-0.493703	-0.487605	0.056014	-0.803634
YAR008W	SEN34	0.0474917	-0.185895	-0.0770203	-0.0554252	-0.275091	-0.352061	-0.571742	-0.275533	-0.288033	-0.148813
YAR009C	YAR009C	-1.58302	0.11276	-0.130525	0.95637	-0.301448	-0.022211	0.515715	0.776286	-0.792636	0.648774
YAR010C	YAR010C	-0.720577	-0.396166	0.269942	0.580113	-0.370336	0.516755	-0.227165	-0.237632	-0.411865	0.105221
YAR014C	BUD14	-0.0223037	0.0905098	0.0727624	-0.349199	-0.861519	-0.422903	0.153556	-0.0468707	0.0985249	-0.067714
YAR015W	ADE1	-0.881613	-0.603194	0.195784	0.0762124	-0.578731	-0.293175	-0.656252	-0.17931	-0.67495	0.504661
YAR018C	KIN3	-0.216601	0.239487	-0.0441188	0.394403	-0.533492	-0.136661	-0.271915	0.0257497	-0.322278	0.402243
YAR019C	CDC15	0.0541864	0.269627	0.0584913	-0.00178058	-0.349594	0.147036	0.30885	-0.29594	0.332574	-0.242909
YAR020C	PAU7	-1.02761	-0.429773	-0.104171	1.25521	1.66426	0.914769	-0.00337188	0.396135	-0.819747	1.54848
YAR023C	YAR023C	-0.158659	-0.475328	0.20945	0.202176	1.18524	0.426868	-0.325517	0.364408	-0.362456	1.64588
YAR027W	UIP3	0.239882	0.414729	-0.00374896	0.364832	0.680818	0.388663	0.177127	0.30043	0.0446642	0.160056
YAR028W	YAR028W	0.647005	-0.131199	0.229779	-0.236334	0.285009	0.231305	-0.0852571	-0.0286871	-0.166011	0.47426
YAR029W	YAR029W	0.410428	1.00785	-0.0686133	-0.16901	1.24904	0.287698	0.642026	0.0564255	-0.0278452	1.0928
YAR031W	PRM9	0.479667	-0.61818	0.367161	-2.66293	0.535197	-0.56104	-1.04384	-0.698321	-0.380209	-0.374285
YAR033W	MST28	-0.135959	-0.156791	0.0682856	-1.74835	0.393089	-0.219679	-0.15322	-0.250443	-0.039094	0.393689
YAR035C-A	YAR035C-A	-0.890358	-1.25612	-0.0746369	2.17964	0.540483	0.900856	-0.768266	0.702619	-1.5934	1.04277
YAR035W	YAT1	0.536407	-0.378751	0.250907	1.36382	-0.0903809	1.11132	0.363484	0.832498	0.227399	0.232455
YAR042W	SWH1	0.206906	-0.029882	0.000390244	-0.0395497	-0.456803	-0.124673	0.454514	-0.127612	0.307293	-0.451465
YAR050W	FLO1	-0.294721	0.0929862	-0.438949	0.579104	0.477627	-0.326238	2.18609	1.29788	0.506415	0.780574
YAR064W	YAR064W	-0.808673	-0.905904	0.248831	0.86805	0.706102	0.906206	0.386627	1.12587	-0.716622	1.2288
YAR066W	YAR066W	-1.12834	-3.18195	-0.593357	-1.39596	0.242744	2.04712	-0.26173	-0.690461	-1.66536	-1.33956
YAR068W	YAR068W	-1.84528	-3.48037	-0.400117	-1.80318	-0.82215	0.866296	-0.144209	-1.23865	-1.42412	-0.162998
YAR071W	PHO11	1.42743	-0.0941779	1.19222	-0.902174	-0.561141	0.356199	0.685696	0.266708	0.629109	0.901713
YAR073W	IMD1	0.559043	-3.99987	-0.776048	-0.807748	-0.455294	0.943871	0.23252	0.787336	-0.846267	-1.58053
YAR075W	YAR075W	-0.0425019	-0.665816	-0.142768	0.369994	0.27858	0.267886	1.20258	1.88116	-0.410511	0.355584
YBL113C	YBL113C	-0.300285	-0.816068	-0.24466	0.296063	-0.0671518	0.341798	-0.311775	0.17138	-0.251217	-0.232623
YBL112C	YBL112C	0.517511	-1.25656	-0.973295	1.74546	1.67258	1.98144	-0.670476	0.625317	-1.03238	-0.584027
YBL111C	YBL111C	-0.434663	-1.00095	0.164385	0.298279	0.0668271	0.495521	-0.244044	0.445268	-0.510209	-0.174821
YBL108C-A	PAU9	-1.43995	-1.68766	0.0687071	0.925937	1.66477	0.264479	-0.250393	0.352181	-1.09111	0.89668
YBL107C	YBL107C	-0.695892	-0.745005	0.199841	1.00013	1.44785	0.234903	-0.424001	0.304732	-0.73278	0.50947
YBL106C	SRO77	-0.208951	-1.78295	0.00472565	0.0274241	0.780167	-1.05867	-0.594036	-0.893715	-0.165699	-0.883942
YBL105C	PKC1	0.146834	0.46074	-0.184801	0.835673	0.596167	-0.468035	0.132379	-0.538928	0.444449	-0.567935
YBL104C	YBL104C	0.0110975	-0.0509384	-0.0668514	0.528794	0.574428	-0.290251	0.15922	-0.140185	0.0674677	-0.155165
YBL103C	RTG3	-0.0470929	0.528539	-0.113971	1.10478	1.14603	0.0339878	0.27682	-0.34919	-0.0157741	0.120699
YBL102W	SFT2	-0.230063	-0.234858	0.138422	0.763999	1.40016	0.209127	-0.318066	0.395294	-0.463452	-0.00822527
YBL101C	ECM21	0.387113	0.344863	0.0430895	0.88337	0.620184	0.0859649	0.374662	0.147395	0.569977	-0.332378
YBL099W	ATP1	0.296414	-0.16542	-0.0606774	0.768951	0.219848	0.575419	0.00574099	-0.306156	0.139036	-0.21666
YBL098W	BNA4	-1.20837	-2.32068	0.243213	0.00351108	1.22132	-1.01021	-0.211802	0.236881	-0.356145	-0.186111
YBL097W	BRN1	-0.416403	-0.457121	-0.180159	0.699747	0.340107	-0.34674	-0.0931518	-0.573265	-0.296247	-0.607448
YBL095W	YBL095W	-0.419003	-0.617568	0.0675555	0.641361	0.601666	0.0778594	-0.289332	-0.45936	-0.155777	0.23923
YBL093C	ROX3	-0.17874	-0.543226	0.0280285	0.359855	1.01301	0.0112854	-0.293856	0.113808	-0.500985	-0.00386287
YBL092W	RPL32	-0.705196	-0.982388	-0.103381	0.928404	0.636928	0.610727	-0.553278	-0.124258	-0.854185	0.279778
YBL091C-A	SCS22	-1.47619	-1.45265	0.125857	1.12264	2.1945	0.663764	-1.04835	0.136003	-0.717954	0.505037
YBL091C	MAP2	0.00421174	-0.387451	0.00578193	0.621194	0.768429	-0.249836	-0.603374	-0.348519	-0.23209	-0.288902
YBL090W	MRP21	-0.0801938	-0.414047	0.0367205	0.85888	1.49067	0.0792849	-0.616585	-0.262099	-0.623804	0.24034
YBL089W	AVT5	-0.349046	0.0721978	0.0321064	0.672137	0.980843	0.100523	0.301185	0.30195	0.132428	0.276315
YBL088C	TEL1	0.186797	-0.427829	-0.256533	0.766615	0.994831	-0.0472449	0.228569	0.00659706	0.206925	-0.0052639
YBL087C	RPL23A	-0.493276	-1.08508	-0.129082	0.896221	0.706062	0.377655	-0.575586	-0.027183	-0.689989	0.128955
YBL086C	YBL086C	0.331146	0.457485	0.114653	0.00997155	0.75175	0.171831	-0.42544	-0.322815	0.0655695	0.285355
YBL085W	BOI1	0.233915	0.182643	-0.231108	0.599902	-0.00660112	-0.19672	0.291756	-0.31174	0.241273	-0.571551
YBL084C	CDC27	0.294649	0.144273	-0.187174	0.958945	0.524358	0.101466	0.176045	-0.464893	0.179353	-0.419308
YBL082C	ALG3	0.118751	-0.0411778	0.143837	0.135368	0.855377	-0.283945	0.15942	-0.415092	0.214448	-0.0273804
YBL081W	YBL081W	0.44753	0.343686	-0.0373428	0.770734	-0.269765	-0.11249	0.22195	-1.04424	-0.0220242	0.255844
YBL080C	PET112	-0.222607	0.109177	0.17047	1.27621	1.20543	0.79264	-0.258337	0.277588	0.0140984	-0.227073
YBL079W	NUP170	0.108798	0.0282645	-0.141264	0.717671	0.345075	-0.499409	0.353605	-0.39667	0.310705	-0.547225
YBL078C	ATG8	-0.518744	-0.0563742	0.23243	1.91602	2.02835	0.614041	-0.556086	0.879505	-0.439365	0.941536
YBL076C	ILS1	0.0782952	0.0749443	-0.154207	0.220687	-0.113829	-0.517708	0.269772	-0.393478	0.130756	-0.55321
YBL075C	SSA3	-0.33764	0.407906	-0.296535	1.00938	0.751436	-0.126438	0.321218	-0.187563	0.242909	0.0536283
YBL074C	AAR2	-0.330167	-0.0490953	0.325374	1.73594	2.42903	0.257119	0.734544	0.336836	-0.351675	-0.159921
YBL072C	RPS8A	-0.629777	-0.823043	-0.0584076	0.908975	0.51084	0.499013	-0.625654	0.0275543	-0.677819	0.10864
YBL071W-A	KTI11	-0.724326	-0.964772	0.0487856	0.895401	1.36886	0.356603	-0.30488	0.110681	-0.884458	0.727348
YBL071C-B	YBL071C-B	-1.28233	-1.46312	-0.114345	2.11002	2.34272	0.61626	-0.46142	0.342089	-1.35217	0.772361
YBL069W	AST1	0.161519	-0.165365	0.26475	0.809134	0.515834	0.121231	0.143043	0.0714095	0.126735	-0.0473705
YBL068W	PRS4	0.0189208	-0.318604	0.0869669	0.412473	0.345215	-0.329694	-0.149661	-0.141045	-0.103754	-0.164888
YBL067C	UBP13	-0.0965843	0.309072	-0.201886	0.767127	0.842186	-0.622999	0.391797	-0.179155	0.557925	-0.792945
YBL066C	SEF1	0.666604	0.732352	-0.29006	1.50505	-0.0207503	0.932181	0.0685697	-0.606982	0.256635	-0.735738
YBL064C	PRX1	0.751993	0.263824	0.386039	1.89878	2.39293	1.0547	0.900239	0.79606	0.317306	0.107072
YBL063W	KIP1	-0.0419475	0.170362	-0.138618	0.441612	0.435248	-0.171188	-0.101622	-0.459607	0.11671	-0.638793
YBL061C	SKT5	-0.156835	0.0655315	0.197931	0.378671	-0.0646049	-0.258859	0.108221	-0.0128745	-0.075922	0.0215825
YBL060W	YEL1	0.108972	0.328644	-0.0484313	0.27586	0.83054	0.0556877	0.247019	-0.15994	0.200437	0.241947
YBL059W	YBL059W	-0.182504	-0.35791	0.00790323	1.53401	1.55295	0.701357	-0.55666	0.251734	-0.539844	0.702471
YBL059C-A	CMC2	-1.02829	-1.06871	0.0270746	1.23955	1.62454	0.0828081	-0.939742	0.0104228	-1.02297	0.423577
YBL058W	SHP1	-0.145599	-0.100175	0.149094	0.59338	0.595636	-0.0348904	-0.132369	0.0560928	-0.10832	-0.0994501
YBL057C	PTH2	-0.495434	-0.752534	-0.00911642	0.265305	1.07279	-0.398729	-0.445869	0.0132881	-0.495359	-0.241614
YBL056W	PTC3	0.116425	0.0366943	-0.0276923	0.81331	0.831582	-0.235593	0.011432	-0.111314	0.141325	-0.547902
YBL055C	YBL055C	-0.224361	-0.455582	-0.0454568	0.0467795	0.365374	-0.560479	-0.184978	-0.0253107	-0.243265	-0.589118
YBL054W	TOD6	-0.110289	0.206092	0.0818473	-0.0182872	-0.0732654	-0.349332	0.192196	-0.275392	-0.104388	-0.384063
YBL052C	SAS3	-0.678447	-0.331178	0.0120947	-0.0361295	-0.0692538	-0.756703	-0.29841	-0.721887	-0.196834	0.0197712
YBL051C	PIN4	0.493644	0.244489	-0.274794	0.895633	0.311948	-0.0172659	0.107298	-0.705161	0.0153025	-0.382748
YBL050W	SEC17	-0.0808175	-0.285685	0.16726	0.719744	0.99276	0.0441041	-0.543883	0.113988	-0.405983	0.0302533
YBL049W	MOH1	-0.30834	0.0530692	0.126806	4.06075	2.72464	2.02669	-0.173163	0.58156	-0.455661	0.766678
YBL047C	EDE1	0.63838	0.661377	-0.334523	1.24551	0.630642	0.00597587	0.438619	-0.530838	0.786274	-0.337745
YBL046W	PSY4	-0.0883704	0.208217	-0.227675	0.744621	0.594416	-0.220406	-0.301264	-0.233903	-0.293559	0.002908
YBL045C	COR1	0.749622	-0.111987	-0.405833	0.705165	0.171464	0.861514	-0.106397	-0.784228	0.403589	-0.438378
YBL044W	YBL044W	-0.866911	-1.27624	0.068512	0.777907	2.49067	0.655706	-0.4841	0.163193	-0.837952	0.425255
YBL043W	ECM13	-0.435723	-0.608173	0.100565	5.85758	2.06335	3.08186	0.0624858	-0.0430131	-0.244075	1.5405
YBL042C	FUI1	0.832378	1.19167	0.152413	1.37565	0.724673	0.82513	1.04104	-0.258006	0.620101	0.658016
YBL041W	PRE7	-0.871863	-0.431818	0.133075	0.867971	0.68986	-0.0572427	-0.270153	0.144576	-0.712592	-0.0580407
YBL040C	ERD2	-0.228611	-0.289055	0.0764389	0.620424	1.09429	-0.172938	-0.136592	0.262538	-0.196867	0.126324
YBL039C	URA7	0.113701	-0.077505	-0.0282686	0.324714	0.0567221	-0.33347	0.212991	-0.375803	0.152192	-0.590157
YBL038W	MRPL16	-0.248552	-0.112988	0.0676672	1.06772	0.886465	0.374278	-0.622228	-0.230695	-0.296637	0.441948
YBL037W	APL3	0.196541	0.383355	-0.145437	0.678452	0.586624	-0.146458	0.617327	-0.144004	0.411998	-0.26238
YBL036C	YBL036C	-0.238524	-0.387338	-0.0919667	0.489449	0.797614	-0.239102	-0.437907	-0.0936075	-0.356078	-0.00955419
YBL035C	POL12	0.101566	0.155438	-0.168588	1.0338	0.247663	-0.188368	-0.202068	-0.69135	0.0893563	-0.726181
YBL034C	STU1	0.0612539	0.253146	-0.315848	0.931342	0.431459	-0.2723	0.389887	-0.253017	0.256604	-0.668283
YBL033C	RIB1	0.0779736	-0.238897	0.115419	0.711637	1.02129	0.372432	0.171151	-0.041906	-0.0332263	0.119089
YBL032W	HEK2	-0.353305	-0.648566	-0.00212138	0.562106	0.737423	-0.141451	-0.589861	0.0518097	-0.208059	-0.257975
YBL031W	SHE1	-0.162272	0.0386574	-0.0469656	0.19796	0.804513	-0.116414	-0.694797	-0.160167	-0.432249	0.336541
YBL030C	PET9	0.495733	0.157403	-0.0206908	1.02324	0.645693	0.781078	0.297118	-0.252033	0.429243	0.0643936
YBL029W	YBL029W	-0.244631	-0.986882	-0.424602	-0.246642	-1.87097	-1.02634	0.0456144	0.398352	-0.783484	0.212191
YBL029C-A	YBL029C-A	-0.687633	-0.701024	-0.201979	1.46368	1.22731	0.597095	-0.93993	-0.00301217	-0.691485	0.644081
YBL028C	YBL028C	-0.905482	-1.16311	0.0765786	0.507217	0.700581	-0.0335686	-0.652676	-0.260032	-1.13412	0.227066
YBL027W	RPL19B	-0.836689	-0.992137	-0.0624209	1.11182	0.718164	0.497724	-0.736288	0.0991348	-0.814842	0.210799
YBL026W	LSM2	-0.83955	-1.02429	-0.051869	0.631151	0.940965	-0.218269	-0.876323	-0.0904457	-0.893736	0.26063
YBL025W	RRN10	-0.886302	-0.7229	0.0179311	0.658909	1.65983	0.174279	-0.752513	-0.306065	-1.04605	1.18145
YBL024W	NCL1	-0.00667016	-0.16056	-0.12714	0.468657	0.0579408	-0.309453	-0.0401241	-0.428671	0.0842774	-0.471017
YBL023C	MCM2	0.184911	0.477836	-0.404811	1.15487	0.444963	-0.155101	0.416661	-0.563898	0.464877	-0.741559
YBL022C	PIM1	0.0869364	0.116451	0.0312644	0.751357	0.478092	-0.193799	0.459469	-0.00246367	0.286062	-0.409972
YBL021C	HAP3	-0.240319	-0.320206	0.206887	0.823395	1.37515	0.379679	-0.792083	-0.147059	-0.641953	0.632359
YBL020W	RFT1	0.678478	0.533256	-0.273509	0.544586	1.09495	0.21971	0.800412	0.162931	0.541168	-0.52413
YBL019W	APN2	-0.144849	-0.215743	0.10475	0.364769	1.27301	0.0610407	-0.17737	0.391283	-0.104536	0.0570454
YBL018C	POP8	-0.992499	-1.11618	0.0979342	0.433332	0.702688	-0.537988	-0.682496	-0.21988	-0.831291	0.274958
YBL017C	PEP1	0.448385	0.328905	-0.137074	0.454883	0.422185	-0.327278	0.588394	-0.220641	0.431071	-0.280136
YBL016W	FUS3	-0.188609	-0.54128	0.094072	0.234381	-0.94744	-0.343191	-0.169351	-0.119527	-0.565478	0.17125
YBL015W	ACH1	0.909787	0.549849	-0.112906	1.69882	1.12477	0.720153	0.13106	0.582989	0.281423	-0.0214158
YBL014C	RRN6	-0.0097531	0.128182	-0.212563	0.0799704	0.198977	-0.491187	0.340407	0.117986	0.099647	-0.190062
YBL013W	FMT1	1.11744	0.0279204	-0.485641	0.502223	0.96757	0.7973	-0.184573	0.0568651	0.0100381	-0.769247
YBL011W	SCT1	0.118678	0.297039	-0.0796836	0.639189	0.52492	-0.53868	0.416625	0.13656	0.258936	-0.766806
YBL010C	YBL010C	0.131018	0.230505	0.166978	0.710077	0.924398	0.0969557	-0.739648	-0.249059	-0.36565	0.728351
YBL009W	ALK2	0.0445023	0.254311	-0.306945	0.125752	0.299419	-0.430453	0.0962442	-0.676755	0.084642	-0.475787
YBL008W-A	YBL008W-A	-0.561059	-0.674664	-0.270142	1.0348	0.834142	0.634976	0.332652	0.984305	-0.748888	0.394142
YBL008W	HIR1	-0.413774	-0.0620123	-0.00812619	0.31605	0.543323	-0.280311	0.268475	0.136569	0.24028	-0.514031
YBL007C	SLA1	0.465354	0.401955	-0.21263	0.995026	0.684991	0.0480135	0.422457	-0.393869	0.662464	-0.411209
YBL006C	LDB7	-0.476641	-0.795958	-0.0366625	0.810856	1.57713	0.138232	-0.731925	0.00524155	-0.927764	0.149733
YBL005W-A	YBL005W-A	-0.315766	0.510183	0.520468	0.994561	-0.318846	0.693678	-0.332627	-0.186924	-0.662125	0.504368
YBL005W	PDR3	0.274798	-0.334743	-0.178811	0.332085	1.74828	-0.432941	0.0180865	-0.0678977	-0.0070635	-0.616067
YBL004W	UTP20	-0.170503	-0.285852	-0.277372	0.522056	0.122698	-0.250342	0.388478	-0.287447	0.13026	-0.561163
YBL003C	HTA2	-0.615724	-0.948219	-0.114212	0.659937	0.390058	0.0691017	-0.735427	-0.232103	-0.729164	0.076998
YBL002W	HTB2	-0.622323	-0.80726	-0.143168	0.950575	0.627762	-0.0309771	-0.718776	-0.117833	-0.657551	0.178701
YBL001C	ECM15	-0.249906	-0.772766	0.0832959	1.49709	2.09831	0.781183	-0.594956	0.439428	-0.67992	0.13978
YBR001C	NTH2	0.720933	1.18644	0.218225	1.98658	1.3025	0.550468	0.609112	0.130666	0.692421	-0.249718
YBR002C	RER2	-0.00830862	-0.0673725	0.191616	0.663845	0.912337	0.277335	-0.32849	-0.135862	-0.436336	0.225295
YBR003W	COQ1	0.0101632	0.111914	0.161419	0.989945	1.0373	0.205718	-0.229508	0.266559	0.0820135	-0.286827
YBR004C	GPI18	0.184402	0.40342	0.0153485	0.873251	1.10823	-0.180711	0.476417	0.139924	0.225463	0.171781
YBR005W	RCR1	-0.116438	-0.352359	-0.0718576	1.19249	2.24938	0.408602	-0.579989	0.920919	-0.836476	0.431574
YBR006W	UGA2	0.562932	0.731093	0.0708517	1.18066	1.73479	-0.0529777	-0.0225838	0.556226	0.0565369	0.449234
YBR007C	DSF2	0.349318	0.593699	-0.17179	1.01899	0.529017	0.001045	0.264644	-0.140268	0.318496	-0.244209
YBR008C	FLR1	-0.251873	-0.344678	0.379817	0.180985	1.56149	-0.584146	1.67573	-0.262196	0.515824	0.449135
YBR009C	HHF1	-0.887901	-0.969749	-0.140761	0.76296	0.278569	0.252013	-0.818614	-0.219476	-0.846558	0.28483
YBR010W	HHT1	-1.35887	-0.870776	-0.1408	1.15154	0.489413	0.245692	-0.923634	0.0948875	-0.850112	0.362647
YBR011C	IPP1	-0.363784	-0.572135	-0.0433492	0.45917	0.414009	-0.134569	-0.235436	-0.127584	-0.250309	-0.29824
YBR013C	YBR013C	0.100583	-0.0906214	0.372455	1.30695	2.33755	0.709676	-0.147888	1.39177	-0.190943	0.440757
YBR014C	GRX7	0.197631	-0.216735	0.113875	0.48567	0.88515	-0.0430609	0.00117801	0.023344	-0.000521683	-0.0144068
YBR015C	MNN2	1.00141	0.709326	-0.177282	0.384624	0.561929	-0.143623	0.630846	-0.400621	0.740839	-0.535696
YBR016W	YBR016W	-0.780625	-0.945965	-0.183368	1.39127	1.52142	0.133925	-0.740512	0.0903883	-0.967991	0.162049
YBR017C	KAP104	0.280763	0.240025	-0.169888	0.615818	0.184783	-0.39331	0.467026	-0.353783	0.290789	-0.410505
YBR018C	GAL7	0.109258	0.10794	0.317766	0.0529354	2.79433	0.157036	-0.438011	0.268965	-0.259657	0.8723
YBR019C	GAL10	-0.525973	-0.514578	-0.160618	0.046753	1.99014	-0.100601	-0.0583547	0.309801	-0.0750894	-0.267648
YBR020W	GAL1	-0.693322	-0.488446	-0.155622	0.676741	1.50145	0.183222	0.381491	0.354074	-0.256967	0.800488
YBR021W	FUR4	1.61065	1.61053	-0.118608	0.727295	1.29243	0.219534	1.09096	-0.0390308	0.948645	0.0587367
YBR022W	POA1	-0.620979	-1.34426	0.0239638	1.33184	1.54521	0.630229	-0.633887	0.232247	-0.723099	0.277374
YBR023C	CHS3	0.225866	0.411894	-0.135788	0.81667	0.354084	-0.182591	0.617714	0.00338247	0.547039	-0.4747
YBR024W	SCO2	0.351901	0.356034	0.280625	0.622904	1.46923	-0.32161	-0.475665	0.193436	0.102277	0.111153
YBR025C	OLA1	-0.0834005	-0.636499	0.0343147	0.428569	0.193854	-0.268525	-0.22301	-0.0669184	-0.266721	-0.371925
YBR026C	ETR1	0.077523	-0.244302	-0.120279	0.730769	1.2217	0.0706198	-0.312435	0.00539646	0.0066209	-0.274282
YBR028C	YPK3	-0.161758	-0.0303852	0.0459253	0.383763	0.488022	-0.055323	-0.103258	0.168524	0.113151	-0.16722
YBR029C	CDS1	0.52402	0.403384	-0.0956725	0.353149	0.519783	-0.066312	0.393735	-0.373651	0.341758	-0.344969
YBR030W	RKM3	-0.311308	-0.203059	-0.0544589	0.108836	0.292305	-0.452148	-0.449388	-0.591377	-0.201231	-0.104946
YBR031W	RPL4A	-0.242517	-0.539571	-0.0196185	0.421882	0.0563716	0.269514	-0.314421	-0.0900017	-0.411116	-0.162538
YBR033W	EDS1	1.22346	1.23775	0.640483	3.16089	2.75573	2.98437	-0.839327	1.49062	-0.0118817	1.46749
YBR034C	HMT1	-0.283636	-0.581231	0.165697	0.662838	0.277858	-0.151356	-0.0258187	-0.107591	-0.0747114	-0.0958891
YBR035C	PDX3	-0.180466	-0.549092	0.0140048	0.868311	1.27578	-0.00908178	-0.828328	-0.18741	-0.21547	0.179745
YBR036C	CSG2	0.581519	0.530137	-0.115741	0.467428	0.810845	-0.151255	0.408532	-0.322862	0.371791	-0.30362
YBR037C	SCO1	-0.158853	0.11008	0.0951728	0.490187	1.52753	0.270651	-0.478508	-0.0549469	-0.345756	0.232918
YBR038W	CHS2	0.693584	0.783031	-0.2168	1.17239	0.555853	-0.217417	0.491903	-0.674847	0.834903	-0.674331
YBR039W	ATP3	0.395791	-0.240819	-0.111396	1.08435	0.791268	0.839149	-0.22326	-0.1574	-0.0908658	-0.0310376
YBR040W	FIG1	-1.41438	-1.32518	-0.483637	3.18916	0.553959	-0.446983	1.332	0.56824	0.189648	-1.01781
YBR041W	FAT1	0.968204	1.10157	-0.517977	0.0214655	0.532293	-0.247852	0.979036	-0.447038	0.874918	-0.83172
YBR042C	CST26	-0.198584	-0.0231414	-0.0264885	0.229416	0.866745	-0.304872	-0.0484817	0.128251	-0.261416	-0.379124
YBR043C	QDR3	-0.0535898	0.707104	-0.0406574	1.00769	1.23456	-0.159246	0.508479	0.221094	0.340474	0.23883
YBR044C	TCM62	0.0282369	-0.158554	0.174902	0.290332	1.09187	0.180764	0.035857	0.151823	0.0631004	-0.111999
YBR045C	GIP1	0.566991	-0.156663	0.177403	0.147407	1.88077	0.0666668	0.639319	0.693781	0.108125	0.159464
YBR046C	ZTA1	0.318695	0.416009	0.830453	1.00295	1.69189	0.532007	-0.16868	0.682302	0.217425	0.234362
YBR047W	FMP23	0.181596	-0.00882222	1.18091	0.0721776	2.51547	-0.179323	0.116757	1.51955	-0.283061	0.702177
YBR048W	RPS11B	-1.12722	-0.772731	-0.100737	0.941701	0.621017	0.264872	-0.644047	0.0244733	-0.669914	0.226986
YBR049C	REB1	0.3521	0.423873	-0.375121	-0.103431	-0.0506259	-0.560866	0.290764	-0.589575	0.339474	-0.706717
YBR050C	REG2	0.553656	-0.194686	0.920951	0.0469675	1.05141	1.57261	0.721789	0.730818	0.342486	0.868733
YBR052C	RFS1	-0.140409	-0.138982	0.152548	1.07119	1.5009	0.637838	-0.56468	0.179209	-0.217523	-0.159142
YBR053C	YBR053C	0.101183	-0.076561	0.0712001	1.49381	1.67069	0.627444	-0.43957	0.654592	0.341673	0.199279
YBR054W	YRO2	3.5524	0.329038	-0.00375693	4.10793	0.0199192	1.32742	1.3676	0.437175	1.75655	-0.7373
YBR055C	PRP6	-0.0201741	0.0595737	-0.0920587	0.492373	0.650192	-0.232738	0.118062	-0.364166	0.234175	-0.177087
YBR056W	YBR056W	0.269608	0.314256	0.0535455	1.73595	1.67526	0.612215	-0.32272	0.844014	0.260266	-0.447976
YBR056W-A	YBR056W-A	-1.24479	-1.36437	-0.730601	3.34529	3.30081	1.37893	-0.0430974	2.13805	-1.7019	0.73656
YBR057C	MUM2	-0.592285	-0.61205	-0.324675	0.613067	0.641493	-0.297771	-0.926511	-0.794357	-0.697224	0.488468
YBR058C	UBP14	0.146072	0.0299335	-0.0881521	0.781106	0.534455	-0.334883	0.158174	-0.164852	0.0659823	-0.173372
YBR058C-A	TSC3	-0.968297	-1.17012	-0.0945138	1.07554	1.31758	0.0297732	-0.882477	-0.16528	-0.92119	0.198126
YBR059C	AKL1	0.364988	0.540968	-0.0313972	1.16399	0.599156	0.098705	0.216199	-0.0750597	0.292648	-0.253123
YBR060C	ORC2	0.339324	0.226081	-0.322832	0.870345	0.67968	0.00612741	0.167129	-0.00497454	-0.115326	-0.597374
YBR061C	TRM7	-0.333897	-0.243935	-0.0296871	0.340246	0.652934	-0.208968	-0.197077	-0.282271	-0.276948	-0.0735704
YBR062C	YBR062C	-1.1384	-0.667521	-0.0688901	0.838307	1.31092	0.143729	-0.736902	0.0486015	-0.527566	0.0858672
YBR063C	YBR063C	0.312237	0.402544	-0.171068	0.896127	0.748129	-0.0422184	0.515772	0.151887	0.227724	0.202998
YBR065C	ECM2	-0.321893	-0.540975	0.0308602	0.71334	1.18308	-0.0191901	-0.251461	0.459551	-0.4438	-0.00513166
YBR066C	NRG2	-0.532983	-0.841964	0.304639	1.60552	1.57248	1.24941	-0.347009	0.627848	-0.415867	0.477056
YBR067C	TIP1	-0.475737	-0.389811	-0.456392	0.985139	0.528629	-0.972235	-0.878288	-1.50101	-0.695051	-0.500639
YBR068C	BAP2	-0.0779487	0.459419	-0.140548	0.807616	-0.0266375	0.149314	0.422289	-0.0174397	0.237917	-0.0566946
YBR069C	TAT1	-0.0533294	0.417449	-0.276619	0.539764	0.174671	0.0603237	-0.144712	-0.909086	0.162477	-0.821162
YBR070C	ALG14	-0.337998	-0.279781	-0.157609	0.927517	1.12363	0.0775841	-0.403893	0.234766	-0.171988	-0.247259
YBR071W	YBR071W	-0.220676	0.372163	-0.0536615	2.01575	0.888072	0.816918	-0.775249	0.0417621	-0.453556	0.516553
YBR072C-A	YBR072C-A	-0.851453	-1.45608	-0.224083	1.20815	1.27576	0.343996	-0.595661	0.362974	-0.806798	0.302641
YBR072W	HSP26	-0.325344	-1.56322	0.118563	3.18825	3.98836	3.92971	0.617474	1.6243	1.27025	0.079964
YBR073W	RDH54	-0.194084	-0.0324514	0.0339604	0.43772	-0.0488093	-0.830374	-0.144612	-0.260127	0.0376571	-0.350294
YBR074W	YBR074W	0.669094	0.633426	-0.109134	0.288415	0.603093	-0.631687	0.77672	-0.254005	0.761979	-0.0219343
YBR076W	ECM8	0.323404	1.0161	-0.00671126	0.498187	1.3225	0.63401	0.251873	1.0271	-0.056639	0.232615
YBR077C	SLM4	-0.209509	-0.294522	0.0564948	1.29136	1.56099	0.202404	-0.576378	0.0898044	-0.480494	0.604267
YBR078W	ECM33	0.258199	-0.102054	-0.0899614	0.588382	0.217467	0.125729	0.134646	-0.229668	0.083549	-0.522281
YBR079C	RPG1	0.146851	-0.0299092	-0.0946591	0.546272	-0.215575	-0.220572	0.227097	-0.448643	0.0916372	-0.556965
YBR080C	SEC18	0.108828	0.108939	-0.155339	0.908132	0.609283	-0.164345	0.328925	-0.201036	0.421041	-0.527218
YBR081C	SPT7	0.385801	0.199779	-0.141486	0.862197	0.51965	-0.305116	0.179005	-0.542645	0.289191	-0.393195
YBR082C	UBC4	-0.528047	-0.972973	-0.169811	0.785084	0.576613	0.034455	-0.673373	-0.101587	-0.667875	0.0811222
YBR083W	TEC1	-0.00498862	0.379834	-0.320311	0.52307	-0.929627	-0.443066	-0.292156	-0.559289	-0.312608	-0.110781
YBR084C-A	RPL19A	-0.865603	-0.706751	-0.0488801	0.914565	0.698172	0.369241	-0.550211	-0.042835	-0.619878	0.210868
YBR084W	MIS1	0.0966962	-0.293768	-0.19077	-0.0448875	-0.274607	-0.670251	0.286557	-0.36271	0.188628	-0.685631
YBR085C-A	YBR085C-A	-0.474508	-0.69047	0.16399	1.80183	2.02875	0.684604	-0.0555597	1.32906	-0.719566	1.07811
YBR085W	AAC3	-0.110946	-1.23395	0.205869	-2.35565	1.1727	-2.348	-0.0276476	0.947716	-0.934072	-0.189465
YBR086C	IST2	0.469561	0.708444	-0.209536	0.445284	-0.0116231	-0.267012	0.622909	-0.442021	0.582286	-0.649581
YBR087W	RFC5	-0.0728031	-0.179541	-0.0664093	0.413772	0.739888	-0.181433	-0.18349	0.155225	-0.283831	-0.0690016
YBR088C	POL30	-0.207988	-0.362975	-0.216167	0.675557	0.36487	-0.266507	-0.657029	-0.318455	-0.359444	-0.46025
YBR089C-A	NHP6B	-0.834137	-1.17448	0.0572305	1.01262	1.08572	-0.127747	-0.614317	0.460766	-0.939908	0.682754
YBR090C	YBR090C	-0.535997	-0.369679	-0.248709	1.53473	1.04361	0.781712	-0.129466	0.866706	-0.322204	0.228532
YBR091C	TIM12	-0.465118	-0.777519	0.103319	0.877349	1.56756	0.429537	-0.61402	0.0048763	-0.870305	0.561969
YBR092C	PHO3	0.684497	0.742379	-0.111352	0.800294	-1.05554	-0.293369	0.246531	-0.283322	0.260162	0.232046
YBR093C	PHO5	2.32431	0.4081	1.71869	1.75274	1.36344	1.2815	-0.180619	-0.25533	0.888482	1.73838
YBR094W	PBY1	0.049219	0.120743	0.111215	0.220265	0.36226	-0.485223	0.301411	-0.249043	0.0465238	-0.200732
YBR095C	RXT2	0.0335391	0.187375	0.0580961	1.2357	1.01006	0.490072	-0.168134	0.0460474	-0.206881	0.492776
YBR096W	YBR096W	0.383297	0.0460019	0.023579	0.538707	1.05892	-0.266404	0.272819	0.252083	0.218799	-0.112948
YBR097W	VPS15	0.258368	0.112455	-0.160898	0.972792	0.870587	-0.292363	0.429146	-0.0117873	0.347754	-0.632241
YBR098W	MMS4	-0.0514951	0.369984	-0.0807561	0.474214	0.907711	-0.194408	-0.092869	-0.145396	0.106127	-0.303509
YBR101C	FES1	-0.455166	-0.836567	-0.138314	0.242571	0.19862	-0.476997	-0.360647	-0.355738	-0.335221	-0.27386
YBR102C	EXO84	0.380746	0.498632	-0.117658	0.641413	0.558233	-0.254905	0.095864	-0.358877	0.344138	-0.375702
YBR103W	SIF2	0.182744	0.289076	-0.0915223	0.700346	0.609567	-0.00737997	0.0287361	-0.0859494	0.163902	-0.281216
YBR104W	YMC2	-0.0418764	-0.133424	0.0610212	-0.246296	0.18569	-1.01118	-0.121449	-0.0792485	-0.14746	-0.128434
YBR105C	VID24	0.352408	0.78082	0.52985	1.89027	1.87694	1.547	0.407422	1.08929	0.201782	0.900785
YBR106W	PHO88	-0.279191	-0.746173	0.0107377	0.403025	0.846234	0.0177918	-0.327983	-0.0120103	-0.445772	-0.0777332
YBR107C	IML3	-0.196795	-0.362189	0.174635	0.293377	1.69872	-0.0822388	-0.502878	0.26252	-0.635316	0.763887
YBR108W	AIM3	0.809107	0.761427	0.0297868	0.790717	1.14678	0.0295313	0.361311	-0.359687	0.659592	-0.744771
YBR109C	CMD1	-0.370234	-0.662722	-0.0361493	0.907818	0.989451	0.0329896	-0.429258	-0.00961207	-0.524657	0.0785935
YBR110W	ALG1	0.510269	-0.0929015	0.049279	0.832014	0.526258	-0.0969433	0.469876	0.0874122	0.418924	-0.739322
YBR111C	YSA1	-0.384696	-0.43773	0.00324349	0.910247	1.04434	0.186449	-0.733523	0.217578	-0.503442	0.0447243
YBR111W-A	SUS1	-1.34555	-0.676753	-0.0868325	1.52098	1.62669	0.347545	-0.99581	0.387534	-1.298	1.04279
YBR112C	CYC8	0.660215	0.425316	-0.0462413	0.472337	-0.217194	-0.33377	0.40253	-0.676376	0.444812	-0.586914
YBR114W	RAD16	0.600334	0.431661	-0.16123	0.360077	0.133463	-0.538342	0.670366	0.157753	0.201827	-0.127821
YBR115C	LYS2	0.453984	0.0404837	-0.215466	0.565781	0.0623364	-0.73348	0.519126	-0.122579	0.28801	-0.184728
YBR117C	TKL2	0.434462	-0.696788	-0.0893345	0.661463	3.17658	0.060668	-0.35061	0.0185721	0.343866	-1.05304
YBR118W	TEF2	-0.0396724	-0.550767	-0.0107705	0.337524	-0.00436905	0.356858	-0.286108	0.00524528	-0.3975	-0.225662
YBR119W	MUD1	0.0608607	-0.116755	0.101808	1.27456	1.26422	0.426632	-0.255634	0.149624	-0.413211	0.604931
YBR120C	CBP6	0.232102	-0.0971099	0.277169	1.14563	1.58569	0.628579	-0.826603	-0.0498085	-0.36426	0.49
YBR121C	GRS1	0.2264	-0.147256	-0.0378059	0.670841	0.116581	-0.256737	0.119995	-0.260574	0.0669731	-0.533541
YBR122C	MRPL36	-0.398689	-0.617701	0.01174	0.88744	1.15321	0.222723	-0.640593	-0.0131183	-0.569796	0.23184
YBR123C	TFC1	-0.226179	0.0729572	-0.118678	0.465434	0.517225	-0.408687	-0.129131	-0.228411	-0.178699	-0.453154
YBR125C	PTC4	0.0713436	0.0990748	0.0751194	0.398559	1.13256	-0.106084	0.204283	0.31004	-0.153425	-0.134172
YBR126C	TPS1	0.80436	0.623124	0.13356	1.4338	1.66532	0.880497	-0.08654	0.328761	0.398862	-0.28024
YBR127C	VMA2	0.133863	0.0804898	0.0572217	0.854802	0.562319	-0.0992182	0.172093	-0.127438	0.0517604	-0.23144
YBR128C	ATG14	-0.401745	0.0802139	0.255257	0.824215	1.839	0.253211	-0.917332	0.317468	-0.681878	0.261395
YBR129C	OPY1	-0.605806	-0.382814	-0.0489378	0.709204	1.16142	0.0166761	-0.440134	-0.109153	-0.327277	0.170633
YBR130C	SHE3	-0.00392308	-0.0613883	0.00102098	0.751568	0.608014	-0.083423	-0.568011	-0.222329	-0.0488698	-0.0678729
YBR131W	CCZ1	-0.438974	-0.0332676	-0.0608903	0.598428	0.644324	-0.197536	0.236149	-0.288938	0.22231	-0.15838
YBR132C	AGP2	0.44553	1.71366	-0.00811118	1.36135	1.23365	1.37567	1.19826	-0.187298	1.5613	-0.372374
YBR133C	HSL7	-0.297121	0.188681	-0.0591355	0.986782	0.807404	0.0105494	0.386237	0.218577	0.123784	-0.191754
YBR135W	CKS1	-0.0253741	-0.324164	0.04344	0.920037	1.25951	0.15638	-0.12059	0.296649	-0.625866	0.183207
YBR136W	MEC1	0.29083	-0.179605	-0.378606	0.920313	0.792015	-0.0487986	0.657135	-0.190653	0.60187	-0.734464
YBR137W	YBR137W	0.0501786	-0.318073	0.232748	0.905459	1.58639	0.145406	-0.244204	0.687994	-0.225887	0.00443688
YBR138C	YBR138C	-0.0208909	0.438842	0.107853	1.87532	0.780327	0.34044	-0.0466574	0.0687395	-0.217316	0.821638
YBR139W	YBR139W	1.51204	1.44186	0.194936	1.70821	1.64372	0.893186	0.207691	0.0186298	0.953676	0.423944
YBR140C	IRA1	0.645879	0.0343668	-0.34863	1.29056	0.96842	0.0497103	0.636547	-0.22751	0.583166	-0.588673
YBR141C	YBR141C	-0.355161	-0.130888	0.124911	0.176817	0.397982	-0.263427	-0.403268	-0.754647	-0.31602	0.0573764
YBR142W	MAK5	-0.169402	-0.134981	-0.0863127	0.355745	-0.13506	-0.473891	0.0947175	-0.485394	-0.00673176	-0.552614
YBR143C	SUP45	-0.122945	-0.240129	0.0122006	0.630784	0.254019	-0.242002	-0.0585325	-0.0333898	-0.0415215	-0.337534
YBR145W	ADH5	-0.58729	-1.1855	0.317669	-0.860947	0.889705	-1.03854	-0.33131	0.979566	-0.464489	0.770424
YBR146W	MRPS9	0.0304031	-0.140618	0.190005	0.680251	0.996856	0.0663494	-0.27519	-0.0262145	-0.226744	0.0613095
YBR147W	RTC2	0.260623	0.061131	0.358992	2.58102	3.47643	1.96919	-0.228981	1.68885	0.285617	1.25853
YBR148W	YSW1	-0.164053	-2.89271	0.206619	-0.443401	1.89519	-0.411984	0.328084	1.02175	-0.227384	-1.15497
YBR149W	ARA1	0.785594	1.08486	0.268973	1.93617	1.7636	1.06101	0.104738	1.14026	0.261031	0.551947
YBR150C	TBS1	-0.226325	0.461427	0.00587602	1.0142	0.384289	-0.325401	0.19355	0.102304	-0.138865	-0.264734
YBR151W	APD1	-0.142055	-0.202577	0.0278109	0.661394	1.06697	0.158774	-0.303002	0.339625	-0.326062	0.06458
YBR152W	SPP381	-0.240845	-0.376446	-0.571569	1.30756	1.72404	0.592317	-0.528158	-0.226212	-0.71549	-0.0848263
YBR153W	RIB7	-0.478745	0.25177	-0.0527262	0.838395	0.987959	0.439595	-0.35881	-0.278184	-0.230975	0.593403
YBR154C	RPB5	-0.088128	-0.595889	-0.0786697	0.541327	0.420572	-0.0372725	-0.251129	-0.0658449	-0.42555	-0.050775
YBR155W	CNS1	-0.00633702	-0.207067	-0.0191589	0.308312	0.22913	-0.668085	-0.0714819	-0.50461	0.246399	-0.544587
YBR156C	SLI15	-0.0812103	0.390093	-0.0240914	0.710668	0.578268	-0.0705863	-0.0457488	-0.715451	0.121211	-0.166377
YBR157C	ICS2	-0.501388	0.122604	-0.0503226	0.835528	0.626469	1.24609	0.0190471	0.147618	0.403299	0.0853534
YBR158W	AMN1	0.0488794	0.0678158	-0.0920348	1.09629	0.254053	0.60012	0.0243788	-0.00821037	0.0693218	-0.517137
YBR159W	IFA38	0.569294	0.112843	-0.00277732	0.386312	0.894752	-0.305282	0.320832	-0.149124	0.352701	-0.187275
YBR160W	CDC28	-0.073269	-0.109586	0.0487656	1.15092	0.718601	0.252675	-0.234537	0.206326	-0.160787	0.366869
YBR161W	CSH1	0.761339	0.676101	-0.111578	1.00539	0.612301	-0.300154	-0.0737483	0.225593	0.311307	0.469545
YBR162C	TOS1	0.551016	0.316797	-0.140943	0.729787	0.456903	0.0500212	0.388525	-0.0755195	0.366653	-0.478851
YBR162W-A	YSY6	-0.939295	-1.06457	-0.243055	1.29093	1.10673	0.22815	-0.678326	0.218381	-0.945571	0.34907
YBR163W	EXO5	-0.141398	0.334969	-0.106151	0.731828	1.15098	0.0775726	0.25436	0.321511	-0.123544	-0.240298
YBR164C	ARL1	-0.459329	-0.700547	-0.0615763	0.365628	0.817155	-0.281404	-0.424418	-0.131328	-0.592377	-0.105877
YBR165W	UBS1	-0.195618	0.121994	0.10315	1.47158	1.19347	0.512121	-0.242378	0.127429	-0.515946	0.788006
YBR166C	TYR1	0.189801	0.0287826	0.0759784	0.545873	0.600255	-0.268575	0.110272	-0.0200933	0.047478	-0.0237713
YBR167C	POP7	-0.400886	-0.855693	0.00105526	0.935616	1.43347	0.171258	-0.791014	0.117392	-0.784511	0.824453
YBR168W	PEX32	-0.154682	-0.0133132	0.12672	1.00826	1.29134	0.0925703	-0.199214	0.13513	0.0159469	0.005682
YBR169C	SSE2	-0.53941	-0.466391	-0.25138	1.25331	0.896147	0.500474	0.200248	-0.00741285	0.552516	-1.23758
YBR170C	NPL4	-0.100681	0.117397	0.196379	0.611848	0.590468	-0.0617303	0.230288	0.0814843	0.276646	-0.377194
YBR171W	SEC66	0.138777	-0.357731	-0.0712465	0.338098	0.73733	-0.132887	0.0808233	-0.181936	0.119853	-0.479379
YBR172C	SMY2	0.21523	0.156877	-0.0499318	1.15302	0.250057	0.0355397	0.118475	-0.0910032	-0.00778245	0.0352686
YBR173C	UMP1	-0.139425	-0.647227	0.124313	0.999547	1.19296	0.216176	-0.639084	-0.0544572	-0.581949	0.372967
YBR175W	SWD3	-0.133601	-0.169713	0.146729	0.625715	1.18624	0.095085	-0.155165	0.0799297	-0.264688	0.587952
YBR176W	ECM31	0.179969	-0.0857762	0.225945	-0.0533984	1.09231	-0.383706	-0.00412612	0.154384	-0.0911214	-0.226345
YBR177C	EHT1	0.776948	0.394457	-0.136352	0.36154	1.23147	-0.599898	0.302409	-0.457884	0.885514	-0.585116
YBR179C	FZO1	0.243708	0.287626	-0.055705	0.951422	0.553342	-0.233085	0.0518384	-0.239484	0.378355	-0.569723
YBR180W	DTR1	-0.521332	-0.961418	-0.238976	-0.0408416	1.19406	0.42484	0.0487513	-0.0634188	-0.131845	-0.740748
YBR181C	RPS6B	-0.39401	-0.789732	-0.0661483	0.647981	0.301349	0.440976	-0.379588	0.0390351	-0.592155	0.0506319
YBR182C	SMP1	0.254673	-0.727152	-0.0940845	1.30398	0.896579	0.688896	-0.00243372	0.48253	-0.214462	0.553658
YBR182C-A	YBR182C-A	-0.376811	-0.562163	-0.065313	1.05179	1.01692	0.816289	1.4094	1.44267	-0.540805	0.560529
YBR183W	YPC1	2.01844	1.5183	0.635958	2.56378	1.44816	2.01571	-0.210219	0.651723	1.21788	1.1152
YBR184W	YBR184W	-1.26317	-0.199993	-0.187765	0.166206	0.540188	-0.0574645	-1.15747	-0.278355	-0.418253	-0.251131
YBR185C	MBA1	0.283078	0.125699	0.229262	0.820331	1.26779	0.258905	-0.193294	-0.110414	-0.0048	0.277705
YBR186W	PCH2	-0.479348	-0.578997	0.113963	-0.0102648	0.983886	0.0105043	0.298746	0.562421	-0.433333	-0.168094
YBR187W	GDT1	-0.397922	-0.595397	-0.0792883	0.128587	0.442668	-0.443205	-0.198795	-0.107861	-0.286901	-0.32337
YBR188C	NTC20	-0.443806	-0.708147	-0.000416478	1.11619	1.5474	0.371028	-0.695803	-0.179832	-0.646959	0.522995
YBR189W	RPS9B	-0.530566	-0.740697	-0.0538964	0.862471	0.493909	0.408496	-0.625809	-0.0231369	-0.732014	0.256661
YBR191W	RPL21A	-0.814612	-0.92988	-0.0840641	1.0271	0.593298	0.459227	-0.696755	0.00709219	-0.654514	0.199663
YBR192W	RIM2	0.0125285	0.148469	0.227592	0.576712	0.799005	-0.0134498	0.0257013	0.00442335	-0.0804825	-0.0975792
YBR193C	MED8	-0.0776574	-0.0392703	0.091289	0.986907	1.43843	0.293566	-0.608384	0.119664	-0.607016	0.390579
YBR194W	AIM4	-0.124298	-0.116798	0.131503	2.02639	1.74274	1.05575	-0.352493	0.576927	-0.969738	1.08509
YBR195C	MSI1	-0.319629	-0.075669	-0.157592	0.27442	0.691569	0.0936652	-0.0286174	-0.217725	-0.0729339	-0.445207
YBR196C	PGI1	-0.0854168	-0.420334	-0.0668669	0.619878	0.11135	0.0982472	-0.0805423	-0.0968572	-0.0599466	-0.47927
YBR196C-A	YBR196C-A	-1.0366	0.29606	0.210372	2.52608	2.05975	0.688721	-0.347195	-0.129915	-0.909906	1.00774
YBR196C-B	YBR196C-B	-1.26797	-0.318098	-0.260627	2.59119	2.02225	0.996802	-0.191527	1.20716	-1.39426	0.433716
YBR197C	YBR197C	-0.0250669	-0.229806	0.018678	1.14512	1.29253	0.369271	-0.626661	-0.433726	-0.388032	0.71336
YBR198C	TAF5	0.34187	0.034628	-0.270867	0.657303	0.290847	-0.286381	0.142998	-0.394906	0.162102	-0.495781
YBR199W	KTR4	0.394593	0.506934	-0.0938184	0.613061	0.620202	-0.0439735	0.301997	-0.18577	0.471327	-0.335545
YBR200W	BEM1	0.132777	0.100643	-0.0187699	1.16625	1.11222	-0.0225057	-0.0383766	0.189473	0.0760655	-0.362253
YBR200W-A	YBR200W-A	-0.504663	-0.752988	-0.255862	1.20802	1.20035	0.844883	-0.122514	0.44424	-0.697167	0.54362
YBR201W	DER1	0.294974	-0.203153	0.0611057	0.165322	1.37462	0.477038	-0.110774	0.270589	-0.0733589	0.138912
YBR202W	MCM7	0.335836	0.334092	-0.368423	0.810515	0.11631	-0.160453	0.128304	-0.443196	0.340414	-0.669045
YBR203W	COS111	0.818767	-0.337811	-0.114439	2.77083	2.60913	1.34922	0.954066	1.60162	0.267943	0.287369
YBR204C	YBR204C	0.140345	-0.20001	0.143709	0.403363	1.48193	0.193346	-0.493144	0.173839	-0.179848	-0.181604
YBR205W	KTR3	0.395465	0.218455	-0.0343667	0.245421	0.53104	-0.173764	0.259734	-0.420068	0.293355	-0.526308
YBR207W	FTH1	0.543293	0.436582	0.0268309	0.642908	0.923517	-0.032938	0.220023	-0.166241	0.388512	-0.415392
YBR208C	DUR1,2	-0.644725	0.0540961	-0.00904522	1.1304	1.41442	0.523014	0.929721	0.544344	0.38899	0.0766293
YBR210W	ERV15	-0.219798	-0.880753	0.123674	0.768141	1.33048	-0.097992	-0.493254	0.437049	-0.528452	0.273479
YBR211C	AME1	-0.307345	0.355973	0.0077055	1.04358	1.20855	0.678102	-0.350902	0.139727	-0.482821	0.75335
YBR212W	NGR1	0.368602	0.826113	0.0191316	1.37194	0.528091	0.380038	0.0705274	-0.748775	0.200251	-0.139372
YBR213W	MET8	-0.0210265	-0.136024	0.128684	-0.135367	0.628384	-0.226137	0.172182	-0.267558	0.216733	0.0363618
YBR214W	SDS24	0.783708	0.981367	0.324243	2.36568	2.58218	1.21389	-0.60819	0.67475	0.328819	0.315873
YBR215W	HPC2	0.35607	0.205316	-0.10706	0.887259	0.720839	-0.0618393	-0.0022452	-0.303701	0.0156868	-0.428979
YBR216C	YBP1	0.563021	0.633383	-0.23803	0.947275	1.06595	-0.0285501	0.296012	-0.167356	0.375285	-0.334696
YBR217W	ATG12	-0.324744	-0.578403	0.0423877	1.14964	1.75151	0.448896	-0.487235	0.165908	-0.69812	0.882794
YBR218C	PYC2	0.697642	0.70844	-0.104404	0.338632	0.348109	-0.301588	0.796113	0.255513	0.485451	-0.21293
YBR219C	YBR219C	-0.257285	-0.00857863	-0.385688	0.688772	1.44144	0.214622	0.100229	0.0842112	-0.286993	-0.0410045
YBR220C	YBR220C	0.348955	0.116138	-0.200361	-0.10907	0.789885	-0.0632197	0.192404	-0.40918	0.41235	-1.06787
YBR221C	PDB1	0.034333	-0.139948	0.0417332	0.652933	0.448106	0.00061933	-0.0384882	0.0724719	0.115755	-0.189693
YBR221W-A	YBR221W-A	-1.17813	-0.965935	-0.44888	1.02276	1.02935	0.853654	-0.346573	0.441322	-1.07364	0.783284
YBR222C	PCS60	-0.448717	-0.359302	0.116595	0.806579	0.812424	-0.401737	-0.102924	0.0930156	0.200297	-0.564863
YBR223C	TDP1	0.0271327	0.191716	0.151014	0.819736	1.57902	0.292251	-0.429509	-0.114306	-0.0513805	-0.0131143
YBR225W	YBR225W	-0.0664659	0.662753	-0.00954848	1.33074	0.603252	-0.071956	0.390749	0.190453	0.246725	-0.257676
YBR227C	MCX1	0.0561673	0.110901	-0.0702795	0.439262	0.74765	-0.261702	0.134759	-0.0797087	0.252868	-0.44875
YBR228W	SLX1	-0.283079	0.167193	0.0174849	0.404042	0.96998	-0.396181	-0.209948	0.293841	-0.31591	0.714422
YBR229C	ROT2	0.542734	1.12364	-0.328741	0.805603	0.761621	0.0767921	0.869948	-0.354276	0.904594	-0.551446
YBR230C	OM14	-0.0627191	-0.212369	-0.0734088	1.63273	1.6984	1.05916	-0.678341	0.291597	-0.209004	0.397234
YBR230W-A	YBR230W-A	-0.211404	-1.63122	-0.180417	2.66523	2.122	1.30368	-1.41725	0.220222	-1.07669	0.372286
YBR231C	SWC5	-0.458115	-0.245472	-0.0511835	0.930455	0.989409	0.0322875	-0.573346	-0.0906909	-0.442824	0.31796
YBR233W	PBP2	0.0244318	0.409674	0.0802898	1.01539	0.876387	0.0942089	-0.184466	-0.121729	-0.1901	0.192967
YBR233W-A	DAD3	-0.92552	-1.03418	0.114641	0.551126	1.35255	-0.187511	-0.980205	-0.0604174	-1.33275	0.465047
YBR234C	ARC40	0.0514043	0.0259558	0.233144	0.714414	1.24086	0.0604082	-0.186739	0.123292	0.0835408	-0.117849
YBR235W	YBR235W	0.528106	0.764254	-0.09926	0.695552	1.21193	-0.179374	0.795943	-0.0405666	0.630937	-0.519021
YBR236C	ABD1	-0.130396	-0.169587	-0.0162239	0.833734	0.916533	0.0289384	-0.2366	-0.0241558	-0.0520117	-0.236017
YBR237W	PRP5	0.303594	0.0604628	-0.242644	0.553606	0.573185	-0.390187	0.111986	-0.300336	0.020022	0.0264878
YBR238C	YBR238C	0.89102	0.344712	-0.329579	-1.13419	-0.496317	-1.71309	1.08444	-0.514946	0.415363	-1.5353
YBR239C	ERT1	0.333932	0.281144	-0.160505	0.822745	0.681734	0.0695321	0.140073	0.147489	-0.0217362	-0.0186084
YBR240C	THI2	0.176286	-2.04415	0.212706	-0.167147	2.17899	0.413262	-0.0720673	0.790331	-0.336989	-0.707746
YBR241C	YBR241C	0.91743	0.637153	0.0936139	1.26482	1.7991	0.805383	0.263351	0.774989	0.488264	-0.217504
YBR242W	YBR242W	-0.471731	-0.556004	0.0723769	0.0503615	0.311017	-0.603358	-0.285934	-0.152735	-0.58498	0.133791
YBR243C	ALG7	0.522295	0.640222	-0.0238776	0.0410545	0.896833	-0.174419	0.384673	-0.477464	0.516834	-0.496203
YBR244W	GPX2	-1.30654	-1.23783	0.221448	0.279606	1.01912	0.0272327	-0.219186	-0.508456	-0.609107	-0.399156
YBR245C	ISW1	-0.0180642	0.0501056	-0.244242	0.287938	0.142036	-0.515338	0.0934473	-0.647867	0.259763	-0.807795
YBR246W	RRT2	-0.303958	-0.405252	0.0135118	0.535188	0.652341	-0.0843404	-0.400004	0.181279	-0.490257	0.0682107
YBR247C	ENP1	0.0334312	-0.11497	0.0997221	0.109606	0.0261047	-0.436212	-0.0113195	-0.414924	-0.0256766	-0.406124
YBR248C	HIS7	-0.0124689	0.0788602	-0.101129	0.500762	0.145636	-0.316009	-0.0964875	-0.468457	0.135496	-0.0243333
YBR249C	ARO4	-0.0699395	-0.133288	0.29332	1.07221	0.59756	-0.202864	0.152775	0.317408	-0.0692342	0.34014
YBR250W	SPO23	0.119138	-1.8491	-0.015361	-0.960428	1.89598	-1.29464	0.542343	-0.212539	0.193002	-1.55177
YBR251W	MRPS5	0.0915405	0.254643	0.314987	0.765033	1.09146	0.117579	-0.480885	0.017507	-0.417331	0.474541
YBR252W	DUT1	-0.803083	-1.06193	-0.164291	0.133968	0.815255	-0.545553	-0.58248	-0.289531	-0.691965	-0.381728
YBR253W	SRB6	-0.722906	-1.03962	0.0436576	0.772572	1.37214	-0.245903	-0.641429	0.153534	-0.807766	0.502537
YBR254C	TRS20	-0.355066	-0.691918	0.0631632	0.624209	1.38742	-0.106774	-0.515667	0.193765	-0.73154	0.255531
YBR255C-A	YBR255C-A	-1.78734	-1.5062	0.00718366	1.09963	1.3725	0.0459633	-0.188493	0.555038	-0.846933	0.510958
YBR255W	MTC4	0.146962	0.297737	0.0935987	1.06144	0.848939	-0.00413426	0.0111057	-0.0766415	0.295156	-0.0567182
YBR256C	RIB5	-0.364281	-0.502244	0.20025	0.771729	1.39268	-0.126292	-0.364254	0.430329	-0.492658	0.310915
YBR257W	POP4	0.133181	0.054317	0.147489	0.859799	0.905692	-0.307585	-0.355075	-0.304117	-0.236849	0.443925
YBR258C	SHG1	-0.468613	-0.596293	0.126765	0.984813	1.4243	0.0996284	-0.808794	0.191804	-0.756028	0.734216
YBR259W	YBR259W	-0.353809	0.162806	0.0103385	0.74136	0.942857	-0.420586	0.0140646	-0.178039	-0.123414	-0.0171378
YBR260C	RGD1	0.209484	0.2863	-0.0801792	0.786793	0.792877	-0.250206	0.323254	-0.139097	0.259513	-0.579365
YBR261C	TAE1	-0.222409	-0.480035	0.07251	0.28907	1.08797	-0.205024	-0.399754	-0.00854552	-0.356052	-0.14962
YBR262C	AIM5	-0.479685	-0.664756	0.0664667	0.907346	1.54156	0.403121	-0.909861	-0.226343	-0.832451	0.368554
YBR263W	SHM1	-0.00513022	-0.129076	0.0419282	0.357502	0.584442	-0.336083	-0.133089	-0.0496669	0.0200624	-0.412394
YBR264C	YPT10	-0.432146	-0.513134	-0.017344	0.680058	1.22236	0.0607892	-0.375519	0.0850356	-0.446854	0.25521
YBR265W	TSC10	-0.248908	-0.535966	-0.121459	0.162164	0.461912	-0.254329	-0.600024	-0.572516	-0.281988	-0.237537
YBR267W	REI1	0.0465612	-0.0530525	0.0185348	0.129435	0.134411	-0.183599	0.0286277	-0.662607	-0.141826	-0.0891125
YBR268W	MRPL37	-0.469849	-0.907986	0.0762142	0.899778	1.6454	0.103162	-0.626852	0.0651896	-0.855428	0.388538
YBR269C	FMP21	-0.469736	-0.465056	-0.0193871	1.46825	1.86682	0.569687	-0.721356	0.305727	-0.474724	0.413029
YBR270C	BIT2	-0.370339	0.107012	-0.00116871	0.341977	0.911483	-0.445552	0.0533531	0.0329347	-0.38804	0.648771
YBR271W	YBR271W	-0.184129	-0.150294	-0.0195357	0.154205	0.329604	-0.657885	-0.218505	-0.257114	-0.198853	-0.313048
YBR272C	HSM3	-0.564813	-0.316166	0.0888825	0.595235	1.28092	-0.278717	-0.221825	0.680974	-0.332385	-0.0841681
YBR273C	UBX7	-0.0207931	0.163286	0.0905565	0.803388	0.874514	-0.132237	-0.100288	-0.00533747	-0.0452045	-0.227013
YBR274W	CHK1	-0.233178	-0.0681116	-0.00905274	0.603762	0.762345	-0.20465	-0.147675	0.0998011	-0.223254	-0.247766
YBR275C	RIF1	-0.0824214	-0.225423	-0.102435	0.565847	0.253987	-0.431724	0.0339325	-0.651713	0.244792	-0.715542
YBR276C	PPS1	-0.261668	-0.000891202	-0.182894	0.407188	0.617098	-0.28398	0.0536375	0.114137	-0.0157241	-0.688545
YBR278W	DPB3	-0.392715	-0.472295	0.0616344	0.935157	1.37782	0.114224	-0.488932	0.221388	-0.589435	0.55086
YBR279W	PAF1	-0.193158	0.171057	-0.0602593	0.767362	0.288224	-0.103812	-0.0436478	-0.119117	-0.0457217	0.0190484
YBR280C	SAF1	0.105334	0.169734	-0.315619	1.06983	1.57946	0.250475	0.185492	0.6997	0.260382	-0.802799
YBR281C	DUG2	0.0762751	0.297374	-0.111733	0.503873	0.328528	-0.164219	0.504349	-0.296149	0.260699	-0.78861
YBR282W	MRPL27	-0.313443	-0.447236	0.0808283	0.805743	1.3042	0.324155	-0.502637	0.207158	-0.641003	0.334542
YBR283C	SSH1	0.366635	0.104382	-0.0939531	0.555097	0.308141	-0.15213	0.314718	-0.433611	0.279732	-0.40989
YBR284W	YBR284W	0.140975	0.148537	0.0379799	1.55611	2.56366	0.113241	1.16937	1.4861	0.0583979	0.479602
YBR285W	YBR285W	0.196235	-0.26571	0.728286	0.7896	1.28226	1.18574	-0.141576	1.86085	-0.577164	0.353349
YBR286W	APE3	0.422406	0.442367	-0.158854	0.745814	0.511094	-0.100798	0.471939	-0.311238	0.411413	-0.34629
YBR287W	YBR287W	0.567469	0.431617	0.0699532	1.02235	1.15169	0.350745	0.322891	0.440176	0.300451	0.0206983
YBR288C	APM3	0.0439705	0.0145428	-0.0128754	0.442118	0.565863	-0.390544	0.0179864	-0.102787	-0.00953442	-0.319449
YBR289W	SNF5	0.267026	0.401215	-0.131594	0.314235	-0.0577602	-0.409783	0.280858	-0.569175	0.276957	-0.473502
YBR290W	BSD2	-0.000562047	0.208597	0.0598472	1.21283	1.12579	0.303427	-0.092798	0.220703	-0.198495	0.620409
YBR291C	CTP1	-0.108782	-0.421605	0.022216	0.435316	0.935048	-0.206237	0.390437	0.757983	-0.39376	0.689712
YBR293W	VBA2	-0.318873	-0.38569	0.106921	0.672663	1.11118	-0.047443	0.0780489	0.270615	-0.216664	0.616336
YBR294W	SUL1	-0.59405	0.630778	-0.0555089	1.6606	1.70912	0.163589	0.0659209	0.589984	-0.380862	-0.036906
YBR295W	PCA1	-0.562382	-0.102365	0.243859	1.57253	1.42246	0.0746946	0.262223	0.747573	0.105214	0.196242
YBR296C	PHO89	0.775766	1.13338	1.67922	3.84519	1.47473	3.62153	1.80509	1.56033	0.888398	2.07313
YBR296C-A	YBR296C-A	-0.832073	-0.906081	0.047964	1.64349	1.20818	1.15637	0.545863	1.56805	-0.756042	0.75823
YBR297W	MAL33	0.196777	0.609704	0.210882	1.86184	1.49124	1.9022	0.70632	1.32159	-0.444251	0.869864
YBR298C	MAL31	0.435956	1.07049	0.0913624	1.02674	1.82153	0.601702	0.447564	-0.177296	0.297527	1.35342
YBR298C-A	YBR298C-A	-1.1159	-1.14289	-0.277945	1.13887	0.92818	0.626787	1.80803	3.06169	-0.738773	0.786761
YBR299W	MAL32	1.01198	0.32876	0.112977	0.856992	1.72926	0.554407	0.663414	1.24174	0.183724	0.185933
YBR301W	PAU24	-0.450927	-2.02838	0.796651	1.00726	2.19862	0.861922	0.388274	0.814695	-0.552449	1.67158
YBR302C	COS2	0.029835	-0.147859	0.0148335	0.499432	0.542923	0.423078	0.0381439	0.129058	0.0354685	-0.14854
YCL073C	YCL073C	-1.33599	-1.15283	0.67862	-0.131554	1.41853	1.51751	0.460361	0.999166	0.169081	1.4152
YCL069W	VBA3	-0.181336	-0.403345	0.292547	0.521285	0.127607	0.243052	0.0581553	0.796214	-0.198913	0.685147
YCL068C	YCL068C	-1.19463	-0.253862	0.340267	1.02559	1.57308	0.929318	-0.0538992	-0.0436142	-0.686503	0.245331
YCL066W	HMLALPHA1	-0.385918	-0.536243	-0.171737	0.920395	0.394378	0.429758	-0.270175	0.436991	-0.330124	0.286798
YCL064C	CHA1	-0.68441	-0.800019	0.158378	0.878652	-0.189751	0.483898	-0.281482	0.340718	-0.308046	0.0762014
YCL063W	VAC17	-1.19183	-0.0198237	0.0760347	-0.22889	-0.261935	0.118067	-0.209983	-0.19654	-0.144882	0.182892
YCL061C	MRC1	-0.985082	0.0975031	-0.191004	-0.0753711	-0.495583	-0.383065	-0.248987	-0.116518	0.0406157	-0.267487
YCL059C	KRR1	-1.21431	-0.510439	0.0614297	-0.810379	-0.678808	-0.568995	-0.0637821	-0.369578	-0.244049	-0.239812
YCL058C	FYV5	-0.90583	-0.84776	0.439252	0.499609	0.00877765	0.327578	1.11049	1.72897	-0.75456	0.437542
YCL057W	PRD1	-0.702812	0.424368	-0.0178896	-0.123619	-0.158153	0.122849	0.436788	0.11002	0.384938	-0.463118
YCL057C-A	YCL057C-A	-1.16939	-1.00055	-0.191188	0.407846	0.452063	0.735797	-0.75295	-0.178668	-0.650191	0.0192738
YCL056C	YCL056C	-1.26025	-0.341736	-0.0621651	0.453222	0.868379	0.119485	-0.418083	0.177487	-0.633108	0.6594
YCL055W	KAR4	-0.989029	0.099011	0.178417	0.495091	-0.11325	0.403874	-0.180834	-0.164903	-0.267282	0.380232
YCL054W	SPB1	-0.764607	0.277465	0.0971107	-0.29031	-1.16101	-0.591814	0.354647	-0.437147	0.25809	-0.251901
YCL052C	PBN1	-0.811072	0.0630346	0.211005	0.265207	0.392791	0.310754	-0.275302	0.449647	-0.0892593	0.175555
YCL051W	LRE1	-0.677074	0.406434	-0.23866	-0.117153	-0.082478	0.111269	0.00496328	-0.285009	0.0444091	-0.514457
YCL050C	APA1	-1.01263	-0.696069	-0.133626	-0.660933	-0.462902	-0.821024	-0.12999	-0.0433079	-0.278166	-0.298788
YCL049C	YCL049C	-0.985236	0.39899	0.768505	1.84719	1.47125	1.32029	1.59082	2.25528	0.00751729	1.26886
YCL048W	SPS22	0.288857	-0.49611	0.494633	1.0019	1.14249	0.581463	0.498825	1.11291	-0.0160211	0.501337
YCL047C	YCL047C	-1.2103	-0.650663	0.16453	-0.764017	0.321009	-0.397061	-0.416775	0.31805	-0.226997	-0.157275
YCL045C	EMC1	0.0601204	0.875997	-0.14905	-0.398163	-0.49165	-0.327035	0.93748	-0.750017	0.812118	-0.439257
YCL044C	MGR1	-0.64256	0.159541	0.114666	-0.141397	-0.319325	0.381789	-0.0766182	-0.124274	0.0811512	-0.0043322
YCL043C	PDI1	-0.361331	0.161809	-0.148575	0.109616	0.0763339	0.391222	0.387602	-0.000789988	0.322863	-0.546662
YCL042W	YCL042W	-0.927668	-0.250172	0.0121064	1.1368	0.806668	0.685265	-1.21131	-0.229951	-0.826528	-0.268528
YCL040W	GLK1	0.796913	1.60157	0.285143	2.23833	2.28604	2.74274	-0.489207	1.1081	0.730582	0.695332
YCL039W	GID7	-1.07696	0.174908	0.138057	0.289608	-0.310097	-0.349662	0.269611	0.492096	0.0793478	0.596884
YCL038C	ATG22	0.031087	1.24998	0.418937	0.757591	0.208775	1.08068	1.16492	0.915081	0.689737	0.162948
YCL037C	SRO9	-0.467409	-0.162125	0.0149014	0.324895	-0.403841	0.0360591	0.10341	-0.339472	-0.0420544	0.302104
YCL036W	GFD2	-1.41473	-0.298194	0.0921162	-1.2363	-1.12856	-0.579874	-0.0172949	-0.137205	-0.214163	-0.125022
YCL035C	GRX1	-1.36378	-0.752302	-0.131375	0.808492	0.956121	0.614517	-1.04546	0.383822	-0.878417	0.318143
YCL034W	LSB5	-1.16422	-0.237956	0.107157	-0.203227	0.00962823	-0.0861448	-0.442756	0.104555	-0.243555	0.209083
YCL033C	MXR2	-1.30889	-0.770708	0.0270778	0.118635	0.862136	0.367998	-0.825386	0.554861	-0.736254	-0.0169464
YCL032W	STE50	-0.717506	-0.04046	0.118458	-0.0420307	0.166165	0.130898	-0.274277	0.0498401	-0.269346	0.200222
YCL031C	RRP7	-0.859444	-0.127134	0.11209	0.221202	-0.167718	0.000179515	-0.164836	0.00166142	-0.262773	0.151022
YCL030C	HIS4	-1.11518	0.343337	-0.0590546	-0.023254	-0.293163	-0.571489	0.120894	0.299935	-0.074843	0.0229131
YCL029C	BIK1	-0.733823	-0.0534122	0.100884	-0.489575	-0.179963	-0.0191198	-0.126063	-0.255441	-0.143201	0.0447743
YCL028W	RNQ1	-0.968043	-0.0502094	0.0461606	-0.258533	-0.434785	-0.279921	-0.152498	-0.327969	0.0186186	-0.278836
YCL027W	FUS1	-2.10307	-0.571677	-0.255429	0.0161056	-2.25604	-0.636028	0.698179	-0.743936	0.2754	-1.57086
YCL026C-B	HBN1	-0.239275	-2.10528	0.610045	-0.380541	2.89028	0.531255	2.27429	0.53582	0.14163	-0.374406
YCL026C-A	FRM2	-0.786437	-2.39997	0.892083	-1.29406	3.45562	-0.468416	2.97719	1.02572	-0.308089	-0.0610343
YCL025C	AGP1	-0.735428	2.24152	-0.198249	0.524844	0.597821	1.31515	0.0850226	-0.14745	0.353434	-0.423037
YCL024W	KCC4	-0.799432	0.49411	-0.440655	0.305001	-0.700774	0.0319469	-0.165228	-0.405442	0.117276	-0.83286
YCL021W-A	YCL021W-A	-2.29058	-1.31795	-0.314939	-0.065664	-0.744555	0.580642	0.486978	0.0827481	-1.26646	0.878556
YCL018W	LEU2	-0.321717	-0.473256	0.171167	1.71043	0.205715	-0.188345	-0.415337	0.28967	-0.424873	-0.113359
YCL017C	NFS1	-0.751328	-0.118296	-0.09677	-0.117853	-0.0713419	-0.186729	0.212597	-0.156522	0.116407	-0.564098
YCL016C	DCC1	-0.912297	0.251408	0.0612199	-0.0218782	0.125098	0.322489	-0.318229	-0.16975	-0.366414	0.682299
YCL014W	BUD3	-0.619668	0.556002	-0.274148	0.290346	-0.401661	-0.139678	0.446761	-0.235568	0.454141	-0.25762
YCL012C	YCL012C	-1.38294	-0.650478	0.0559424	-0.534096	0.372745	-0.833713	-0.636709	0.110737	-0.394587	-0.0870387
YCL011C	GBP2	-0.786918	-0.205819	-0.00933075	-0.252242	-0.177237	-0.314152	-0.111118	-0.184751	-0.168873	-0.0763006
YCL010C	SGF29	-1.19015	-0.875217	-0.172007	0.0711346	0.51589	0.0810605	-0.60753	0.0424086	-0.843541	-0.0159856
YCL009C	ILV6	-0.987724	-0.434734	0.066926	-0.423891	-0.127199	-0.418515	-0.151703	0.0447818	-0.164382	0.150857
YCL008C	STP22	-0.953899	0.0807575	0.0628165	-0.0472919	-0.272283	-0.125783	-0.160509	0.136397	-0.237431	-0.0250943
YCL005W-A	VMA9	-1.59543	-1.07709	-0.160739	0.274522	0.767675	0.0807719	-1.02287	-0.16321	-0.93722	0.0986258
YCL005W	LDB16	-1.05009	-0.0473667	0.163684	-0.587098	-0.0789943	0.0985482	-0.241001	0.293427	-0.387464	0.352619
YCL004W	PGS1	-1.7115	-0.12311	-0.255402	-0.444183	-0.125764	-0.163001	-0.376762	-0.28548	-0.370955	0.0836096
YCL002C	YCL002C	-1.38767	-0.532887	0.0624459	-0.539597	0.0681744	-0.140558	-0.388716	-0.111502	-0.361682	-0.0530431
YCL001W-B	YCL001W-B	-1.01684	-1.21771	-0.0242119	0.749848	1.22874	0.619955	-0.331545	0.762743	-0.92828	0.501495
YCL001W-A	YCL001W-A	-1.57682	-1.47566	-0.10267	-0.1013	1.24516	-0.222698	-0.184654	0.626122	-0.749066	-0.411563
YCL001W	RER1	-1.01636	-0.404781	-0.025906	-0.465772	0.17743	-0.323102	-0.189033	-0.108319	-0.0673984	-0.1672
YCR002C	CDC10	-0.957817	-0.0333154	0.0790404	-0.0852623	0.0485534	-0.220436	0.0325163	-0.0768892	-0.128554	0.0181213
YCR003W	MRPL32	-0.822467	-0.346402	0.256452	-0.0643149	0.673194	0.419624	-0.657107	0.0283033	-0.537056	0.392035
YCR004C	YCP4	-0.862217	0.0883124	0.199878	0.161827	0.612207	0.2721	-0.479711	0.225943	-0.319232	0.0425733
YCR005C	CIT2	-0.562647	0.217387	0.306908	0.946242	0.561318	0.147035	-0.0293709	0.55512	-0.0274444	0.692834
YCR007C	YCR007C	-1.14725	-0.562087	0.355478	0.857111	1.49731	0.291095	-0.294081	0.979985	-0.597979	1.55898
YCR008W	SAT4	-0.705588	0.016601	-0.0225585	-0.0150632	-0.214052	-0.238219	0.445742	-0.0819089	0.268652	-0.361316
YCR009C	RVS161	-1.09738	-0.209499	-0.109542	0.16424	0.118557	0.0783277	-0.489586	-0.127394	-0.285916	-0.130449
YCR010C	ADY2	-1.06008	-0.255049	-0.188884	0.806101	1.28475	0.592038	-0.18388	-0.296549	-0.021788	-0.572956
YCR011C	ADP1	-0.408382	0.648054	-0.056787	-0.222831	-0.10917	-0.0509804	0.695419	-0.171348	0.70148	-0.61612
YCR012W	PGK1	-1.02295	-0.691775	-0.0589803	0.027465	-0.168459	0.26117	-0.287207	-0.134742	-0.442548	-0.28702
YCR014C	POL4	-2.10939	-0.27384	-0.062855	0.392563	0.0189695	-0.597551	0.114377	0.428284	-0.14368	0.480727
YCR015C	YCR015C	-0.376042	0.0423112	0.00839394	-0.518347	0.330152	-0.0022313	-0.526542	-0.1072	-0.135484	0.192237
YCR016W	YCR016W	-0.974031	-0.471981	-0.02747	-0.639536	-0.745229	-0.291169	-0.104531	-0.385812	-0.301059	-0.404183
YCR017C	CWH43	-0.320294	0.886441	-0.308758	-0.0701435	0.0348034	-0.216831	0.989092	-0.375017	0.782246	-0.61008
YCR018C	SRD1	-1.44342	-0.888921	-0.10408	-1.14694	-0.26809	-0.0549958	-0.496429	0.514078	-1.31354	0.665595
YCR019W	MAK32	-1.01246	-0.0612251	-0.0120012	-0.105122	0.257859	0.26568	-0.109275	0.0203127	-0.186364	0.184468
YCR020C	PET18	-0.214743	0.700643	0.608549	0.565201	0.943974	0.491023	0.765249	1.08542	0.078811	1.3352
YCR020C-A	MAK31	-1.44098	-0.877554	-0.0489535	-0.172852	0.486094	-0.433167	-0.665284	0.156989	-0.987164	0.427785
YCR020W-B	HTL1	-2.38993	-0.571831	0.0653295	0.0370085	1.10356	-0.110022	-0.920576	0.340918	-1.4136	1.53322
YCR021C	HSP30	-0.461419	0.0190128	-0.256076	-0.491691	1.49681	1.07307	0.848214	-0.202744	-0.0760703	-0.992289
YCR023C	YCR023C	-1.17287	0.22151	-0.173018	-0.461356	0.185474	0.0404727	0.374642	0.125638	0.285702	-0.384968
YCR024C	SLM5	-0.487503	0.260344	0.396087	0.203893	0.535926	0.287801	0.0266693	0.24262	0.198715	0.34674
YCR024C-A	PMP1	-1.45058	-0.629876	0.150936	1.18901	0.526202	0.386465	-0.0943296	-0.546868	-0.466674	0.946551
YCR024C-B	YCR024C-B	-0.398305	-0.606355	0.00305668	0.84014	0.210364	0.189245	-0.0842048	-0.419955	-0.101879	0.402227
YCR026C	NPP1	-0.892947	0.484564	-0.0534047	-0.181657	-0.629043	-0.0153662	0.452497	-0.237595	0.448827	-0.437239
YCR027C	RHB1	-0.954193	0.0352098	0.0665595	0.656516	0.810249	0.542042	-0.572369	-0.0537333	-0.523609	0.640495
YCR028C	FEN2	-0.0545641	0.217549	-0.158201	-0.0895632	0.0718951	0.0665348	0.428925	-0.464337	0.516815	-0.552986
YCR028C-A	RIM1	-1.33026	-0.933783	-0.0626665	0.148207	0.313055	-0.0731714	-0.540917	-0.00655308	-0.547465	0.0317585
YCR030C	SYP1	0.479332	1.49528	-0.0690409	0.552884	-0.0337473	0.16274	1.16413	-0.116564	1.50312	-0.112966
YCR031C	RPS14A	-0.89269	-0.889645	-0.0359796	0.560702	0.338749	0.537506	-0.549518	-0.173622	-0.665094	0.206281
YCR032W	BPH1	-0.66329	-0.325312	-0.139075	-0.0500294	-0.124875	-0.0820379	0.471355	0.0301273	0.249946	-0.489126
YCR033W	SNT1	-0.92303	0.0400636	-0.281531	-0.148603	-0.7911	-0.151615	-0.16547	-0.525207	-0.0733076	-0.859066
YCR034W	FEN1	-0.142761	0.206258	-0.10509	-0.838297	-0.696546	-0.619807	0.119228	-0.668786	0.271623	-0.55542
YCR035C	RRP43	-0.965702	-0.163659	-0.043944	-0.443482	-0.46885	-0.201726	-0.147905	-0.279541	-0.277613	-0.127854
YCR036W	RBK1	-1.18594	-0.0573237	0.24976	0.11864	0.25089	0.32168	-0.191732	0.506663	-0.151994	0.652995
YCR037C	PHO87	-1.14521	0.155054	0.117365	0.653777	0.117349	-0.112779	0.370604	0.180288	0.250268	0.436549
YCR038C	BUD5	-1.01117	0.13356	0.267529	0.154549	-0.233013	0.138905	-0.0245562	-0.21382	0.0214641	0.508997
YCR042C	TAF2	-0.985559	0.263259	-0.0666874	0.203706	-0.468253	-0.1909	-0.0251736	-0.502595	0.188311	-0.154865
YCR043C	YCR043C	-1.41445	-0.754074	0.010126	0.0504515	0.240511	-0.1953	-0.615385	0.164549	-0.536868	0.298296
YCR044C	PER1	-0.485634	0.0613477	0.00320205	-0.255194	0.113261	-0.224023	-0.190365	-0.245694	0.213569	-0.057606
YCR045C	RRT12	-0.654369	-0.488294	0.149115	0.763806	0.440074	0.137145	0.0492861	0.742377	-0.148405	0.560009
YCR046C	IMG1	-1.17749	-0.869596	-0.00549283	0.0796356	0.565019	0.194468	-0.651713	-0.0349241	-0.596289	-0.0745514
YCR047C	BUD23	-0.966457	-0.227256	0.0859496	-0.568507	-0.547065	-0.479686	-0.15914	-0.47359	-0.305965	-0.016202
YCR048W	ARE1	-0.570996	0.265255	-0.191656	-0.355713	0.0973515	-0.185142	0.215301	0.146808	0.272221	-0.585526
YCR051W	YCR051W	-1.38068	-0.834777	-0.00154073	-0.708164	-0.27833	-0.225094	-0.595127	-0.518149	-0.734113	-0.205165
YCR052W	RSC6	-0.726977	-0.101833	0.0159263	-0.308604	-0.277785	-0.19726	-0.116183	-0.0763759	-0.171047	-0.234863
YCR053W	THR4	-0.614072	-0.183261	-0.141154	0.0203461	-0.379282	-0.204012	-0.124916	-0.0725431	-0.0927491	-0.315058
YCR054C	CTR86	-1.54746	0.205093	0.146459	0.102491	-0.166331	-0.0404486	0.544759	0.249386	0.0303694	-0.102396
YCR057C	PWP2	-1.0631	-0.0208014	-0.0455623	-0.565415	-0.969792	-0.864823	0.265441	-0.427779	-0.0965544	-0.491228
YCR059C	YIH1	-1.43376	-0.973378	-0.0159282	-0.0891324	0.124769	0.219024	-0.66993	0.0656034	-0.699193	0.257812
YCR060W	TAH1	-1.40872	-1.17791	-0.00750235	-0.0117466	0.338965	0.271138	-0.301008	0.559304	-0.930522	0.554838
YCR061W	YCR061W	0.320596	1.47895	-0.147015	-0.249598	-0.12809	-0.0713768	1.51401	-0.219684	1.40608	-0.487994
YCR063W	BUD31	-1.33327	-0.679119	-0.0136794	1.36136	1.46569	0.557066	-0.963699	-0.0954851	-0.812887	0.798727
YCR065W	HCM1	-0.918572	0.264899	-0.417815	0.514427	-0.439847	0.106918	0.0624344	-0.737616	0.371432	-0.528478
YCR066W	RAD18	-0.878805	0.265468	0.0146042	0.00843555	-0.259215	0.196132	0.162781	0.0871549	-0.102906	0.359998
YCR067C	SED4	-0.208973	0.573628	-0.092519	-0.145442	-0.567471	-0.300556	0.960477	-0.246376	0.711912	-0.197949
YCR068W	ATG15	-0.191075	0.00922261	-0.204923	0.652135	0.555874	0.436453	0.357307	-0.0327894	0.343199	-1.46559
YCR069W	CPR4	-0.51576	0.369792	-0.0711499	-0.161081	0.436045	-0.21073	0.474677	-0.0803466	0.556131	-0.322607
YCR071C	IMG2	-0.924454	-0.591673	-0.0340813	0.247169	0.735466	0.272621	-0.711469	0.0011897	-0.629974	0.262989
YCR072C	RSA4	-0.729662	0.0751767	0.0396548	-0.208826	-0.701708	-0.239989	0.234313	-0.631311	0.0152746	-0.288349
YCR073C	SSK22	-1.02514	-0.13686	0.180622	-0.523461	-0.292342	-0.606584	0.330034	0.205161	-0.00351408	0.0337635
YCR073W-A	SOL2	-0.902146	-0.191649	0.0452424	0.0912798	0.214489	0.335008	-0.377513	0.139128	-0.182427	-0.0701695
YCR075C	ERS1	-1.44184	-0.103961	-0.377704	-0.778019	0.383644	-0.0149278	-0.970998	-0.11368	-0.493787	-0.00681136
YCR075W-A	YCR075W-A	-1.99741	-1.01084	-0.103047	-0.0094122	0.70508	-0.0803505	-0.997774	0.125735	-0.926702	0.146896
YCR076C	YCR076C	-1.22666	-0.306191	0.139808	-0.438533	0.350719	0.00417928	-0.550561	0.0860268	-0.404233	0.300463
YCR077C	PAT1	-0.630395	-0.110447	-0.133578	-0.153517	-7.80397	-0.366797	0.289274	-0.431408	0.239629	-0.355016
YCR079W	PTC6	-0.635245	0.0694599	0.242486	-0.0620525	1.14732	0.130665	-0.541902	0.0989212	-0.211401	-0.0249117
YCR081W	SRB8	-0.320465	0.14856	-0.253452	0.343633	-0.651144	0.227549	0.356149	-0.109031	0.171289	-0.612725
YCR082W	AHC2	-1.3029	-0.699422	0.0141843	0.132808	0.290511	0.278428	-0.165648	0.0763652	-0.446996	0.276574
YCR083W	TRX3	-2.00547	-1.01855	0.0621001	-0.130986	0.126968	0.205616	-0.525021	0.685255	-0.761697	0.316254
YCR084C	TUP1	-0.406139	0.393639	-0.351034	-0.138672	-0.61919	-0.245509	0.354391	-0.803391	0.367573	-0.592551
YCR086W	CSM1	-1.17451	-0.264335	0.17443	0.344167	0.173137	0.217122	-0.35067	0.361131	-0.360317	0.747487
YCR087C-A	YCR087C-A	-1.64373	-1.21366	0.0126284	-0.860108	-0.299087	-0.357272	-0.59766	-0.377924	-0.946767	0.133394
YCR088W	ABP1	-0.552906	0.174639	-0.0730498	-0.0015726	0.0164083	0.0162871	0.126056	-0.220886	0.142599	-0.509609
YCR089W	FIG2	-0.679852	0.0860862	-0.0815306	1.05413	-0.290781	-0.179464	0.739868	-0.860317	0.535605	0.990221
YCR090C	YCR090C	-1.68809	-1.62001	0.0708058	-0.28365	0.179916	-0.580364	-0.762356	-0.136789	-0.845063	-0.172738
YCR091W	KIN82	-0.407895	0.956658	-0.11034	0.882551	0.521676	0.809378	-0.134256	0.0132347	0.194006	0.472928
YCR092C	MSH3	-1.19521	-0.138141	-0.211866	-0.392399	-0.592612	-0.478818	0.196479	-0.106408	0.061445	-0.481144
YCR093W	CDC39	-0.62096	-0.340896	-0.0892544	0.476347	-0.36627	-0.22957	0.493251	-0.356798	0.427398	-0.423461
YCR094W	CDC50	-0.634504	0.288561	0.0908464	0.0193151	0.172615	-0.219558	-0.122242	-0.0789606	-0.0558196	0.023693
YCR095C	OCA4	-0.933391	0.202295	-0.019388	0.273515	0.156934	-0.0246937	-0.0421803	0.14715	-0.395961	0.260728
YCR096C	HMRA2	-1.90104	-0.824549	-0.23403	-0.0645856	0.511794	-0.0397787	-0.974205	0.225861	-0.9913	0.833881
YCR097W	HMRA1	-2.12677	-1.04269	-0.061757	0.497464	0.392822	-0.143326	-0.962904	-0.031459	-0.849064	0.371298
YCR098C	GIT1	-1.19848	-0.290202	0.153427	-0.973313	1.36745	1.05222	0.977597	1.19467	0.041403	1.05828
YCR099C	YCR099C	-1.85716	0.0486779	-0.249391	0.596558	1.23427	0.042818	-0.0527252	-0.332047	0.0145007	1.17536
YCR100C	YCR100C	-1.27293	0.0514764	-0.471915	0.540443	1.06616	0.142147	0.166974	-0.547463	0.661005	0.318177
YCR101C	YCR101C	-0.42698	-0.218272	-0.326873	1.15472	2.0635	0.713698	0.017908	0.234	-0.141629	0.375339
YCR102C	YCR102C	0.0875618	-0.0515216	0.259275	-2.45421	3.3081	-1.17279	1.93342	0.153345	0.951494	-0.314913
YCR104W	PAU3	-0.683413	-1.08876	0.571484	-0.30201	3.4455	0.559531	2.27699	1.9055	0.346993	1.88654
YCR105W	ADH7	-0.936876	-1.15031	0.0711288	-0.0470443	1.33629	0.291307	-0.441525	0.443678	0.027751	-0.556619
YCR106W	RDS1	-1.40124	-1.68965	-0.0250248	-1.96754	0.410007	0.135413	0.766039	0.22786	0.201772	0.425077
YCR107W	AAD3	-0.984081	-1.29571	-0.0158121	-1.27075	0.872818	0.425071	0.522773	0.184195	0.369854	0.320215
YCR108C	YCR108C	-0.920028	-1.74836	-0.147087	1.52834	1.37814	1.3122	1.22101	1.55957	-0.912358	1.9499
YDL248W	COS7	0.0717939	-0.325535	0.00356143	1.22157	1.02019	1.11179	-0.0734399	0.27588	-0.131341	-0.267528
YDL247W	MPH2	-0.327317	-0.459006	-0.175345	0.0774388	0.383819	0.342179	0.929019	1.27319	-0.058333	-0.0849725
YDL246C	SOR2	-1.07825	-2.76037	0.73044	-1.14935	0.480967	0.826264	-0.160134	1.25552	-0.62662	1.13043
YDL245C	HXT15	-0.163238	-0.061528	-0.138636	0.26496	0.34749	0.159825	0.175874	0.430627	0.0852124	-0.264695
YDL244W	THI13	0.57967	-2.74349	0.58189	1.09773	1.4563	1.47129	0.409325	2.01299	-0.39778	1.58049
YDL243C	AAD4	-0.736941	-0.619593	0.58182	-1.38955	1.61217	-0.273389	0.301347	-0.0455252	0.155555	0.928742
YDL241W	YDL241W	-0.257461	-0.794358	0.255629	-1.83066	-0.112432	-0.0475957	-0.217517	1.25365	-2.05209	1.35455
YDL240W	LRG1	-0.255213	0.272739	-0.417723	0.0902092	-0.689788	-0.105769	-0.0064463	-0.527254	0.125408	-1.04314
YDL239C	ADY3	-0.354313	-0.177158	-0.0261328	0.0803415	0.193431	-0.13171	0.151009	0.351998	0.0256175	0.305595
YDL238C	GUD1	-0.0768163	-0.364271	0.102944	0.955425	0.834952	0.467528	-0.285542	0.593249	-0.102315	0.207938
YDL237W	AIM6	0.665671	0.393541	-0.0116254	-0.00156474	0.34625	0.176509	0.140183	-0.24844	0.475635	-0.220574
YDL236W	PHO13	0.112832	-0.288707	-0.0103956	-0.172062	-0.210949	-0.10909	-0.117216	-0.0429271	-0.181457	-0.109686
YDL235C	YPD1	-0.290271	-0.551269	0.09988	0.230198	0.385161	-0.076385	-0.405788	0.339554	-0.412128	0.238786
YDL234C	GYP7	0.53688	0.837075	0.169443	0.840095	0.585571	0.281012	0.427403	0.785408	0.466546	0.203364
YDL233W	YDL233W	0.20443	0.283298	-0.042093	0.17528	0.149999	0.4003	-0.2336	0.0251778	-0.301888	-0.0401759
YDL232W	OST4	-1.05475	-1.30294	-0.137622	0.24944	0.707888	-0.0161343	-0.874449	-0.258893	-1.12031	0.302987
YDL231C	BRE4	-0.227876	-0.133577	0.0556815	-0.0408262	0.126952	-0.192991	0.0335271	0.0635315	-0.06192	0.369032
YDL230W	PTP1	0.105246	0.00985255	0.204907	-0.441737	0.552734	0.0216383	-0.526103	0.532948	-0.274248	0.150733
YDL229W	SSB1	0.0353425	-0.31813	-0.145283	0.206113	-0.360571	0.137088	0.00943541	0.035163	-0.168544	-0.526569
YDL227C	HO	0.399437	-0.572775	-0.109205	-0.937472	-1.76592	-0.287019	-0.471189	-0.577863	0.122624	-3.75393
YDL226C	GCS1	-0.0651597	-0.245846	0.0360934	-0.344536	-0.0203123	-0.225822	-0.262145	-0.0520537	-0.203362	-0.144186
YDL225W	SHS1	0.159276	-0.0324148	0.0240034	-0.183637	-0.268053	-0.123215	0.0375024	-0.175899	0.113963	-0.300835
YDL224C	WHI4	0.207079	0.563163	-0.141237	0.225413	-0.46801	0.00933048	0.119265	-0.364971	0.291288	-0.256574
YDL223C	HBT1	-0.0214635	0.337201	-0.279515	0.397827	0.144263	0.431927	0.171619	0.43447	0.156614	0.270531
YDL222C	FMP45	-0.675852	-0.806828	-0.102373	1.73585	0.101146	1.27053	0.935481	1.38243	0.191953	-0.593195
YDL220C	CDC13	0.344971	-0.0969881	-0.340685	0.177306	-0.100597	-0.0922921	0.423042	0.118404	0.212206	-0.821793
YDL219W	DTD1	-0.17311	-0.931045	-0.0595618	-0.452519	0.162932	-0.500174	-0.672373	-0.00100676	-0.581499	0.097209
YDL218W	YDL218W	-1.68289	-0.137604	0.358751	-1.81851	-0.188264	-1.88524	-1.25571	-0.764672	-0.439732	-0.177071
YDL217C	TIM22	-0.377855	-0.507906	0.196792	0.284743	0.468616	-0.0596945	-0.436289	-0.0207948	-0.456313	0.402697
YDL216C	RRI1	-0.399199	-0.0336957	-0.0762545	0.16175	0.598955	0.284223	-0.874325	-0.418849	-0.390983	0.54196
YDL215C	GDH2	-0.10363	0.130135	-0.183221	0.938175	0.245851	0.995757	0.222116	0.334679	-0.0430436	0.562062
YDL214C	PRR2	1.51383	0.440972	-0.3536	0.0399796	-0.134167	0.44444	1.04815	-0.116914	0.471107	0.202662
YDL213C	NOP6	-0.406571	-0.711633	-0.0520431	-0.398093	-0.415567	-0.233162	-0.336972	-0.272198	-0.607634	0.101495
YDL212W	SHR3	-0.163237	-0.208249	0.0945602	-0.261376	0.403302	0.0294046	-0.0517864	-0.0770097	-0.0479469	0.0305403
YDL211C	YDL211C	-0.11316	0.0939507	-0.218371	-0.147122	-0.310766	0.450538	-0.605843	-0.857916	-0.154997	-0.0535674
YDL210W	UGA4	-0.00256027	-1.61818	0.115337	-1.27961	0.708037	0.102515	-0.0769056	0.832263	-0.137528	-1.46809
YDL209C	CWC2	-0.813618	-0.131394	-0.250889	-0.171444	-0.274774	-0.0565415	-0.70742	-0.590408	-0.524003	-0.0351353
YDL208W	NHP2	-0.501671	-0.912689	-0.110112	0.274999	0.132467	0.195125	-0.53666	-0.310391	-0.712877	-0.0667511
YDL207W	GLE1	-0.0332991	-0.0532732	-0.120909	0.0401811	-0.0899445	-0.129273	-0.0377158	-0.139105	0.0423895	-0.262669
YDL206W	YDL206W	0.0229577	0.646962	-0.186957	-0.135838	0.238382	-0.283951	0.696967	0.517539	0.553812	-0.411896
YDL205C	HEM3	0.300944	0.0731843	0.285586	-0.213321	0.148513	-0.22453	0.115372	-0.2665	-0.196761	0.0931031
YDL204W	RTN2	-0.486478	0.229904	-0.0543706	0.0653519	0.122537	0.270141	0.656263	0.752258	-0.415217	0.662418
YDL203C	ACK1	-0.173673	0.246968	0.0289111	-0.284503	-0.229301	-0.251976	0.180668	-0.355389	0.0670004	-0.143164
YDL202W	MRPL11	0.00886828	-0.131463	0.156349	-0.0229386	0.474048	0.251305	-0.452431	-0.0371147	-0.312069	0.269722
YDL201W	TRM8	-0.510766	-0.612003	-0.101433	-0.702468	-0.547282	-0.456485	-0.292838	-0.378869	-0.256479	-0.379738
YDL200C	MGT1	-0.157001	-0.259292	0.117113	-0.455014	0.218009	0.0338771	-0.465439	0.259691	-0.386388	-0.130184
YDL199C	YDL199C	0.430795	1.03802	-0.0143922	0.0954541	0.49027	0.486245	-0.282881	0.61049	0.62588	-0.564236
YDL198C	GGC1	-1.00718	-0.649419	0.154074	-0.283492	-0.185555	-0.0436586	-0.525256	0.106218	-0.250109	0.20389
YDL197C	ASF2	-0.112458	0.219028	-0.0823275	-0.0138004	-0.0106942	-0.0415804	-0.434377	-0.252088	-0.141184	0.109278
YDL195W	SEC31	0.52527	-0.0820071	-0.354419	-0.047894	-0.837734	-0.357783	0.448783	-0.646681	0.243575	-0.685026
YDL194W	SNF3	0.330141	0.558876	-0.157271	-0.395302	-0.324779	0.290604	0.15879	0.0408632	0.306019	-0.730851
YDL193W	NUS1	0.357446	0.41917	-0.126919	-0.629515	-0.200777	0.00690776	0.274622	-0.206845	0.402588	-0.38807
YDL192W	ARF1	-0.357334	-0.761519	-0.0465683	0.309124	0.265909	0.126577	-0.522829	-0.203503	-0.490632	-0.128547
YDL191W	RPL35A	-0.714038	-1.07346	-0.0947954	0.438909	0.290793	0.548876	-0.838816	-0.174056	-0.891574	0.257158
YDL190C	UFD2	0.0266988	-0.0207805	-0.0935322	0.0107616	-0.243165	-0.130932	0.268195	-0.0839649	0.165052	-0.145567
YDL189W	RBS1	-0.187613	-0.446196	-0.0760388	-0.0565467	-0.386624	-0.016189	-0.0902949	-0.173981	-0.332987	-0.131791
YDL188C	PPH22	0.217878	0.0270192	0.0867434	-0.226001	0.0181143	-0.062069	-0.230313	-0.213373	-0.0177629	-0.312113
YDL186W	YDL186W	-0.234241	-0.3965	0.0158271	0.585879	0.518542	0.111664	0.263258	0.709308	-0.500837	0.326351
YDL185W	VMA1	0.3013	0.172994	-0.137863	0.203715	-0.401166	-0.182564	0.353505	-0.398943	0.283628	-0.463271
YDL184C	RPL41A	-3.22246	-2.06753	-0.255612	0.777822	0.4525	-0.145496	-2.65634	0.350506	-2.61851	1.1154
YDL183C	YDL183C	0.10453	-0.0770574	0.364926	0.265405	0.40021	0.833501	0.563333	0.768793	0.245216	0.501944
YDL182W	LYS20	-0.0309209	-0.283174	0.243244	-0.587969	-0.650315	-0.588587	0.282991	0.203014	0.0544147	-0.179036
YDL181W	INH1	1.91087	-0.235531	-0.687278	1.92896	0.388752	3.54156	-1.24202	-0.368286	0.655711	1.36305
YDL180W	YDL180W	0.322747	0.306868	-0.00755675	-0.357582	-0.208681	-0.185745	0.147406	-0.328106	0.371033	-0.427793
YDL179W	PCL9	0.0145368	0.678353	-0.0797241	1.23931	-0.109014	0.726175	-0.59878	-0.362005	-0.14769	0.102292
YDL178W	DLD2	0.087658	0.122366	0.311916	-0.295342	-0.141371	-0.347244	0.319223	0.0936118	0.272523	-0.0915085
YDL177C	YDL177C	-0.452711	-0.297272	0.0497958	-0.22166	0.493756	0.0927248	-0.605127	0.348239	-0.774255	0.762631
YDL176W	YDL176W	-0.417283	0.37349	-0.161284	0.0504421	0.0198751	-0.356292	0.0283565	-0.0852201	0.00561154	-0.0294578
YDL175C	AIR2	-0.395287	0.0722473	0.147867	0.454881	0.115922	0.203504	0.313453	0.487073	-0.326867	0.575549
YDL174C	DLD1	0.494482	0.458102	-0.124892	0.309214	0.302938	0.272363	-0.0103294	-0.0619128	0.247571	-0.241604
YDL173W	PAR32	-0.356295	-0.194356	0.162528	0.00843013	0.235374	-0.172417	-0.586534	-0.0102104	-0.557222	-0.00855953
YDL171C	GLT1	0.402103	0.0716642	-0.2099	-0.394844	-0.822853	-0.604446	1.03654	0.367244	0.182057	-0.575552
YDL170W	UGA3	0.0436751	0.526958	-0.0513296	-0.0330052	-0.0318322	-0.348363	0.00196255	0.3112	0.0819264	0.44168
YDL169C	UGX2	0.621466	1.31825	1.2706	2.77152	3.20212	2.87092	-0.395292	1.54361	0.0924478	1.03069
YDL168W	SFA1	0.0765561	-0.044551	0.378215	-0.596688	0.289086	-0.368308	0.570984	-0.000181499	0.174707	-0.449778
YDL167C	NRP1	0.232467	0.232619	-0.130363	-0.684447	-0.943806	-0.449352	0.182911	-0.549779	0.0269	-0.350032
YDL166C	FAP7	-0.214239	-0.668726	-0.0276815	-0.317388	0.00945769	-0.253144	-0.455796	-0.245377	-0.549055	0.016589
YDL165W	CDC36	-0.213138	-0.422794	0.00159607	-0.157459	0.315379	-0.225915	-0.452125	-0.132308	-0.505138	0.038883
YDL164C	CDC9	0.00850217	0.37195	-0.233325	-0.0895242	-0.550788	-0.327246	0.116369	-0.444114	0.41857	-0.715872
YDL161W	ENT1	0.311923	0.141554	-0.130542	-0.151836	-0.137977	-0.0329874	0.0286189	-0.434486	0.181842	0.148577
YDL160C-A	YDL160C-A	-1.17526	-1.19458	-0.1516	0.0200255	0.735858	-0.117407	-1.0945	0.121965	-1.22402	0.296578
YDL160C	DHH1	0.754343	0.643374	-0.35962	0.588505	-0.0705112	0.309049	0.0430974	-0.884805	0.265371	-0.455542
YDL159W-A	YDL159W-A	-0.482111	-0.833577	0.0534977	1.85329	0.881221	0.912056	-0.234927	0.310331	-0.57733	0.457323
YDL159W	STE7	0.0449676	0.270081	0.0285437	0.241233	0.081484	0.354827	0.0856859	0.297812	0.0207858	-0.25283
YDL157C	YDL157C	-0.333074	-0.798524	-0.0429876	-0.151544	0.36113	-0.303911	-0.504369	0.0470708	-0.618637	-0.128191
YDL156W	YDL156W	-0.0951553	-0.119104	-0.0340897	0.486864	0.430005	0.538733	-0.204668	0.135974	-0.263854	-0.0345385
YDL155W	CLB3	0.228528	0.0399789	-0.111243	-0.0150553	-0.128518	0.0246902	-0.0808696	-0.349578	0.0219664	-0.0949476
YDL154W	MSH5	-1.00832	-0.675197	0.291016	-0.341313	0.100637	0.256167	-1.00682	-1.33145	-0.743473	-0.474437
YDL153C	SAS10	0.06793	0.102978	-0.107287	-0.848432	-1.15952	-0.596971	0.202257	-0.727281	0.0705525	-0.656429
YDL150W	RPC53	-0.0571283	-0.122758	0.128709	-0.245955	-0.73435	-0.468847	-0.197855	-0.195828	-0.442042	-0.154526
YDL149W	ATG9	0.163623	0.424981	-0.110201	-0.112889	0.176233	-0.135175	-0.0725134	-0.0124834	0.394047	-0.821507
YDL148C	NOP14	0.107992	0.189996	-0.167384	-0.28307	-1.23787	-0.617645	0.329455	-0.747046	0.110237	-0.574571
YDL147W	RPN5	0.00614013	0.119817	0.0421755	0.0243403	-0.180909	-0.0191705	-0.0231923	0.0442939	0.00453034	-0.263628
YDL146W	LDB17	-0.12217	-0.0107899	-0.0038335	0.105637	0.143606	0.0214547	-0.14325	0.442685	0.130629	-0.627344
YDL145C	COP1	0.0793627	-0.0188753	-0.119654	0.0179927	-0.437449	-0.303685	0.32198	-0.379956	0.225269	-0.495922
YDL144C	YDL144C	0.246556	-0.41051	0.104343	-0.101548	0.0228009	0.044893	-0.399784	0.0354603	-0.235525	-0.276061
YDL143W	CCT4	-0.0876347	-0.245416	-0.00848491	-0.17505	-0.307497	-0.108595	-0.0854067	-0.0758533	-0.191533	-0.343143
YDL142C	CRD1	0.134872	0.277917	0.164674	0.32444	0.528898	0.309073	-0.504686	0.199586	-0.443626	0.347274
YDL141W	BPL1	0.23518	0.423284	-0.212837	-0.185708	-0.200349	-0.208744	0.281375	-0.188986	0.236761	-0.540196
YDL140C	RPO21	0.268614	-0.293912	-0.142628	0.00302266	-1.1871	-0.229841	0.171727	-0.491935	-0.00642982	-0.28343
YDL139C	SCM3	-0.0826246	-0.136427	0.35348	-0.208962	0.266881	0.342325	-0.500832	0.0350611	-0.559791	0.758084
YDL138W	RGT2	0.478997	0.763285	-0.133773	0.268902	-0.490112	-0.382048	0.300278	0.0921256	0.428832	-0.256462
YDL137W	ARF2	-0.36395	-0.295614	-0.0283586	0.499676	0.661603	0.207164	-1.00102	-0.378922	-0.207765	-0.0437107
YDL135C	RDI1	-0.190401	-0.804243	-0.0180275	0.15347	0.416395	-0.024744	-0.318558	0.442977	-0.397879	0.0659751
YDL134C	PPH21	0.265571	0.10801	0.00269731	0.102298	-0.16667	-0.217183	-0.0232629	0.00450032	0.0323959	0.0328798
YDL133W	YDL133W	-0.585475	-0.16026	-0.0907865	0.00299353	-0.0157411	-0.0789076	-0.486938	-0.146623	-0.320769	0.410961
YDL132W	CDC53	0.0394079	0.130216	-0.109405	-0.421997	-0.550809	-0.442767	0.351171	-0.141757	0.204063	-0.499805
YDL131W	LYS21	-0.0133717	-0.0676377	0.0392612	-0.0130859	-0.513519	-0.380085	0.297216	0.282996	0.01211	0.01567
YDL130W-A	STF1	0.153286	-0.33871	0.400003	2.10042	1.70984	2.3437	-0.950321	1.55801	-0.232966	1.31092
YDL130W	RPP1B	-0.557311	-0.982488	-0.122797	0.804307	0.421575	0.615322	-0.673367	-0.0335801	-0.838293	0.163394
YDL129W	YDL129W	0.631785	-0.0931064	0.248245	-0.297705	-0.135124	0.14441	-0.617259	-0.570844	-0.692745	0.640627
YDL128W	VCX1	0.958081	0.960937	0.0672945	0.0410427	-0.370623	0.15504	0.61693	-0.63368	0.755291	-0.30194
YDL127W	PCL2	-0.325439	0.203492	-0.0794477	1.02614	-0.219354	0.544489	-0.13181	-0.260016	0.0554808	0.103783
YDL126C	CDC48	0.205556	0.240235	0.0324968	0.0417291	-0.273787	-0.104496	0.29783	-0.0411581	0.20037	-0.390066
YDL125C	HNT1	-0.671402	-0.612419	-0.0385769	0.120206	0.438506	0.550958	-0.442014	0.131554	-0.600273	0.348978
YDL124W	YDL124W	0.444673	0.37337	0.353281	-0.0322101	0.975873	0.631099	0.160584	0.828571	0.0565483	0.189239
YDL123W	SNA4	-0.716876	-0.0234676	0.220718	0.720851	0.839878	0.0630886	0.0961427	0.196005	-0.303094	0.623296
YDL122W	UBP1	0.326862	0.316051	-0.145028	-0.276562	-1.01138	-0.489615	0.513117	-0.651661	0.276788	-0.608843
YDL121C	YDL121C	-0.695652	-0.813221	-0.016165	-0.427847	0.245938	-0.693146	-0.547793	-0.176937	-0.846323	0.142743
YDL120W	YFH1	-0.184266	-0.270548	0.0774572	0.264536	0.380758	0.274867	0.0983914	0.592672	-0.548577	0.278679
YDL119C	YDL119C	0.428799	0.266381	0.394879	0.886921	0.439806	0.648895	-0.378903	0.377431	-0.222134	0.364968
YDL117W	CYK3	0.37683	0.601156	-0.150159	0.485803	-0.667423	-0.181353	0.311024	-0.243259	0.234912	-0.618405
YDL116W	NUP84	0.151041	0.0962088	-0.216327	0.0490594	-0.311084	-0.324294	0.0477131	-0.325031	0.137983	-0.493027
YDL115C	IWR1	-1.06911	0.0383424	0.0591672	0.0727341	0.284572	-0.0441644	-0.133683	-0.149583	-0.0556139	0.25255
YDL114W	YDL114W	-0.324645	-0.41989	0.0610849	0.521391	0.470094	0.211286	0.667364	1.12918	-0.0340767	0.196563
YDL113C	ATG20	-0.163886	0.38529	0.0513247	1.11159	0.738423	0.732334	0.0427265	0.630143	0.147514	0.270923
YDL112W	TRM3	-0.0792238	-0.0851818	-0.199734	-0.634811	-0.783918	-0.623607	0.331483	-0.712351	0.0194403	-0.658619
YDL111C	RRP42	-0.318049	-0.376352	-0.0436292	-0.0234985	-0.0942789	0.108759	-0.143292	-0.105908	-0.461903	-0.112058
YDL110C	TMA17	-0.696834	-0.135047	0.260567	0.78628	1.16098	0.935151	-0.235817	0.503424	-0.395777	1.40523
YDL109C	YDL109C	-0.358905	-0.183663	-0.352684	-0.106227	0.124282	-0.10553	0.165753	0.169478	-0.254805	0.291792
YDL108W	KIN28	-0.541692	-0.20726	0.0662923	-0.144088	0.0156554	-0.166544	-0.182534	0.146691	-0.301831	0.183798
YDL107W	MSS2	-0.296095	-0.245925	0.0277441	0.0995636	0.56382	0.00774522	-0.46953	0.152215	-0.298444	0.450078
YDL106C	PHO2	0.0906765	0.631649	-0.00359899	0.383667	-0.072931	0.297945	-0.139748	-0.168958	0.0779881	0.0121353
YDL105W	NSE4	-0.093096	0.091916	0.0531706	0.177109	-0.0119294	0.0291731	-1.10672	-0.949711	-0.498242	0.276266
YDL104C	QRI7	0.047987	0.0249378	0.0394344	-0.519903	0.487041	-0.0829827	-0.388172	-0.238432	-0.187008	0.364651
YDL103C	QRI1	0.293595	0.304055	0.0575335	-0.341894	-0.0407893	-0.286959	-0.13212	-0.201565	0.149029	-0.392468
YDL102W	POL3	0.156992	0.367921	-0.195148	-0.349591	-0.401087	-0.518652	0.250122	-0.693915	0.384352	-0.763037
YDL101C	DUN1	0.140175	0.254638	0.0472228	-0.109196	-0.386764	-0.156122	-0.255357	-0.102937	0.0779883	-0.186408
YDL100C	GET3	0.0628792	0.0973065	0.0407683	-0.328855	-0.0357491	-0.161995	-0.294235	-0.0924524	0.0665142	-0.179887
YDL099W	BUG1	-0.0563518	-0.0588552	-0.0963257	-0.103748	-0.346784	-0.133055	-0.22089	-0.182052	-0.332197	-0.0475021
YDL098C	SNU23	-0.478099	-1.13781	0.147141	-0.85736	0.612209	-0.413026	-0.439233	-0.151561	-0.552592	-0.07157
YDL097C	RPN6	-0.273962	0.0250807	0.176344	0.0835267	-0.157339	-0.212851	0.0280345	0.0336645	0.00969083	-0.161447
YDL095W	PMT1	0.676701	0.593065	-0.361608	-0.554598	-0.373033	-0.188118	0.661413	-0.51617	0.825941	-1.01836
YDL093W	PMT5	0.733693	0.818639	-0.192226	-1.50435	0.080647	-0.525546	0.890093	-0.551661	0.95757	-1.0669
YDL092W	SRP14	-0.764496	-0.749068	-0.17369	0.209107	0.294136	0.0457014	-0.745029	-0.0852797	-0.652083	0.0529027
YDL091C	UBX3	-0.0312595	0.410194	0.075598	-0.113316	0.268682	0.138739	-0.110519	-0.167457	0.310647	-0.18528
YDL090C	RAM1	0.00464403	-0.296486	-0.0664894	-1.2255	-0.0117928	-0.342952	-0.08865	-0.574039	-0.0625416	-0.351272
YDL089W	NUR1	0.298088	0.135942	-0.092826	-1.3367	-0.0761216	-0.240245	0.468692	-0.41229	0.389862	-0.794649
YDL088C	ASM4	0.156449	0.326615	-0.0903302	0.517065	0.00387124	0.1797	0.230602	-0.0373812	0.139471	0.196961
YDL087C	LUC7	0.0205229	-0.57444	0.200786	-0.0158285	0.662193	0.244476	-0.383579	0.116517	-0.501175	0.312082
YDL086W	YDL086W	-0.0476448	-0.320872	0.139104	0.0166284	0.530819	0.0201443	-0.513517	0.0526578	-0.277588	0.0672528
YDL085W	NDE2	0.883575	0.833613	0.269091	0.702968	2.39971	1.40465	-0.30704	0.230158	0.346765	-0.301197
YDL085C-A	YDL085C-A	-1.90282	-1.15855	-0.189499	0.0341663	0.899501	-0.544526	-1.26774	0.356685	-1.4082	0.831458
YDL084W	SUB2	-0.125019	-0.272877	-0.046708	-0.046606	-0.171974	-0.238241	-0.117651	-0.177185	-0.0629278	-0.417477
YDL083C	RPS16B	-0.734723	-0.955001	-0.0608482	0.564679	0.108216	0.489899	-0.726013	-0.0103447	-0.738248	0.212546
YDL082W	RPL13A	-0.478227	-0.880903	-0.00100736	0.0933534	-0.0944024	0.371619	-0.39396	-0.0772594	-0.617254	0.0788444
YDL081C	RPP1A	-1.03366	-1.02301	-0.00178216	0.879512	0.557925	0.420752	-0.828195	-0.00176872	-0.883807	0.331872
YDL080C	THI3	-0.140398	-0.397372	-0.0972492	0.147247	0.234681	-0.0894371	-0.0994252	0.190127	-0.299059	-0.064054
YDL079C	MRK1	1.07156	0.0588369	0.00139059	-0.331262	0.500598	1.67651	0.636135	1.2533	-0.0212938	-0.032727
YDL078C	MDH3	0.0285963	-0.0696868	0.171212	-0.0570646	0.331861	0.118659	-0.289666	0.13142	-0.104214	-0.149229
YDL077C	VAM6	0.150762	-0.0525926	-0.10981	-0.373934	-0.427707	-0.109893	0.129421	-0.0823661	0.164408	-0.428441
YDL076C	RXT3	0.127837	-0.311089	0.14006	-0.0138789	0.140487	-0.0280887	-0.47601	-0.198353	-0.322145	0.367518
YDL075W	RPL31A	-1.00645	-1.09954	-0.135375	0.640051	0.312113	0.532195	-0.632964	0.0221235	-0.900196	0.291316
YDL074C	BRE1	0.120127	0.0458488	-0.145411	-0.0804309	-0.335604	-0.156934	-0.0259586	-0.342342	-0.0719009	-0.387969
YDL073W	YDL073W	-0.0830168	0.100158	-0.0596453	-0.287144	-0.286759	-0.570888	0.267806	-0.222011	0.280678	-0.33232
YDL072C	YET3	0.231192	0.513585	0.0670958	0.655699	0.62716	0.633887	-0.459371	0.484164	-0.139174	0.374594
YDL070W	BDF2	-0.606721	-0.192967	-0.0745544	-0.0222678	0.209429	-0.857574	-0.482845	0.038688	-0.0915862	-0.195207
YDL069C	CBS1	-0.05806	-0.164646	0.18173	0.0339874	0.48324	0.111782	-0.3489	0.429886	-0.451745	0.684948
YDL067C	COX9	-0.29912	-0.605708	-0.0749075	0.425036	0.816961	0.960212	-0.741633	-0.158071	-0.805692	0.5868
YDL066W	IDP1	0.254814	-0.202118	-0.0088529	-0.173457	0.191696	0.153416	-0.433312	0.50438	-0.201136	-0.00825049
YDL065C	PEX19	-0.180007	-0.00620874	-0.0459524	-0.340277	-0.0641819	-0.658382	-0.2216	-0.246509	-0.0526699	0.0503477
YDL064W	UBC9	-0.557709	-0.527551	-0.00587277	-0.0650798	0.490729	0.0837414	-0.349373	7.9601e-06	-0.42249	0.0429922
YDL063C	YDL063C	-0.0387017	0.0389645	-0.120264	-0.279647	-0.739199	-0.318306	0.384593	-0.357228	-0.0929311	-0.53156
YDL061C	RPS29B	-1.18506	-1.24198	-0.130014	0.821502	0.631942	0.704903	-0.998034	-0.0597788	-1.1438	0.575884
YDL060W	TSR1	0.0774335	-0.0577691	-0.133004	-0.563575	-1.12112	-0.556033	0.294323	-0.398629	0.177082	-0.580352
YDL059C	RAD59	-0.120109	-1.21015	0.114196	-0.246513	0.0909119	0.215	0.154963	0.459068	-0.169666	0.520211
YDL058W	USO1	0.00938975	0.103957	-0.11217	-0.328807	-0.610208	-0.355451	-0.0778493	-0.538703	0.23661	-0.581749
YDL057W	YDL057W	-0.354174	-0.577635	0.257702	-0.323614	0.498087	0.236783	-0.731976	0.151299	-0.486757	0.316289
YDL056W	MBP1	-0.339101	0.351458	-0.051284	0.275696	-0.555676	-0.437824	-0.257643	-0.0449451	0.154396	-0.148799
YDL055C	PSA1	-0.208934	-0.364258	0.0531255	0.324292	-0.441334	0.402275	-0.236458	0.0784739	-0.252663	-0.0773858
YDL054C	MCH1	0.718918	0.852064	0.141786	-0.680924	-0.241248	-0.0215196	0.820835	-0.228386	0.788469	-0.166646
YDL053C	PBP4	-0.285584	-0.405942	0.177057	0.20609	0.566075	0.221383	-0.576111	-0.0422507	-0.728914	0.434679
YDL052C	SLC1	0.153203	0.225098	0.0961365	-0.627369	0.159407	-0.308463	0.298906	0.364719	0.179819	-0.181164
YDL051W	LHP1	-0.24284	-0.608117	0.0147261	-0.259303	-0.0336305	-0.275234	-0.198079	-0.101565	-0.480183	-0.139745
YDL049C	KNH1	-0.326206	-1.07257	-0.106337	0.234374	0.0515063	0.233652	-0.284436	0.742425	-0.265744	0.297363
YDL048C	STP4	2.68703	-0.499016	0.109152	2.02324	-0.777408	1.71463	2.04705	1.17539	1.13378	0.92202
YDL047W	SIT4	-0.0457181	-0.0196054	0.106579	0.148842	-0.27676	0.0528745	-0.139438	-0.0538897	-0.199664	0.0256188
YDL046W	NPC2	0.387828	0.0991721	0.0273193	0.227028	0.124156	0.346773	-0.0567042	-0.114562	-0.0566229	0.248953
YDL045W-A	MRP10	-0.738536	-0.950751	-0.234982	0.220241	0.89904	0.417147	-0.441987	0.154664	-0.703592	0.22326
YDL045C	FAD1	0.366127	0.491192	0.106273	-0.172406	0.266343	0.223397	-0.0211926	0.147605	0.208983	0.258469
YDL044C	MTF2	0.252184	0.298956	-0.0237522	0.155207	0.133611	0.201517	-0.160034	-0.247606	-0.0268911	0.264878
YDL043C	PRP11	-0.0183405	-0.0630247	0.0251443	-0.0880337	-0.32949	0.31492	-0.248708	-0.264194	-0.43488	0.262361
YDL042C	SIR2	0.124885	-0.374296	-0.046406	-0.646658	-0.711894	0.00580228	0.129996	-0.812397	-0.0806689	-0.511054
YDL040C	NAT1	0.293074	0.326312	-0.142625	-0.175131	-0.367737	-0.417989	0.348155	-0.264066	0.3389	-0.541856
YDL039C	PRM7	-2.00995	-2.40331	-1.13473	-2.24969	-2.68727	-3.0934	1.74397	-2.27026	0.232989	-0.110281
YDL037C	BSC1	-0.17779	-0.703596	-0.262805	0.350667	-0.17521	-0.00148294	1.12107	0.161793	-0.118536	-0.348298
YDL036C	PUS9	0.251575	0.204818	0.015159	-0.197541	-0.472394	-0.201959	-0.234993	-0.529796	0.0849297	-0.541645
YDL035C	GPR1	-0.326123	0.307635	-0.00130696	-0.0447613	-0.499792	-0.406027	0.245934	-0.094807	0.325568	-0.682266
YDL033C	SLM3	-0.0547766	-0.0650726	0.217311	0.296585	0.157996	0.416785	0.0478206	0.261592	-0.341089	0.691242
YDL031W	DBP10	-0.13053	-0.146987	0.0213788	-0.263636	-0.830288	-0.601438	0.100371	-0.806158	-0.0408036	-0.552728
YDL030W	PRP9	0.119335	0.0656489	-0.0715746	-0.218065	-0.301154	-0.0312499	0.10214	-0.13882	-0.000241602	-0.419357
YDL029W	ARP2	0.0548542	-0.155103	0.0135107	0.0634202	0.11722	-0.0814246	-0.171572	-0.0293397	0.0011156	-0.283881
YDL028C	MPS1	-0.128181	0.0549266	-0.126772	-0.178541	-0.388277	-0.176029	0.00315149	-0.310754	0.0818407	-0.269198
YDL027C	YDL027C	0.231657	0.289397	0.191267	0.0213227	0.210094	0.330254	-0.0849653	0.344278	0.16338	-0.0417061
YDL025C	RTK1	0.776281	0.735498	-0.117394	0.573737	0.509682	0.639909	0.583921	0.361924	0.724298	-0.0566476
YDL024C	DIA3	0.648163	-1.72218	0.342219	-1.08418	1.68281	0.765216	0.321516	0.812089	0.148006	-0.292062
YDL022W	GPD1	0.269571	0.00535892	0.00919763	0.979202	1.10972	1.0285	-0.527684	0.686524	0.0716511	0.205339
YDL021W	GPM2	0.352229	0.398464	0.473593	1.83634	0.726496	1.52509	0.27737	2.44065	-0.209421	0.550991
YDL020C	RPN4	-0.448833	-0.136702	-0.204789	0.0505141	-0.234067	0.100517	0.212501	-0.117016	-0.0486738	-0.348489
YDL019C	OSH2	0.652482	0.76718	-0.133133	-0.554091	-0.35351	0.0325027	0.248563	-0.0276765	0.531606	-0.417816
YDL018C	ERP3	-0.000986833	-0.0605553	-0.0851104	-0.0757481	0.111978	-0.0556717	-0.699698	-0.0589642	-0.118315	0.0114732
YDL017W	CDC7	0.189254	0.326478	0.0331661	-0.133485	0.0172082	0.558206	-0.215226	0.0300758	-0.0904575	0.0427616
YDL015C	TSC13	0.299261	0.148476	-0.00687828	-0.186499	-0.141343	0.0561204	0.306456	-0.00972453	0.249363	-0.0317329
YDL014W	NOP1	-0.196905	-0.453461	0.0835474	0.189055	-0.341937	-0.0594765	-0.223271	-0.272719	-0.215165	-0.217658
YDL013W	SLX5	-0.61125	-0.41559	-0.137864	-0.116493	-0.332491	-0.138784	-0.132577	-0.10292	-0.124245	-0.186895
YDL012C	YDL012C	-1.00327	-0.796733	-0.132349	0.198526	0.525585	-0.0619109	-0.478985	-0.115468	-0.792797	0.354615
YDL010W	GRX6	0.133115	0.376257	-0.2038	0.221126	0.494437	-0.0708295	0.128141	0.666866	0.0010666	0.251027
YDL008W	APC11	-1.26095	-1.12581	0.0457615	0.167256	0.335013	0.404888	-0.70557	-0.119312	-0.741658	0.0915666
YDL007W	RPT2	-0.0435164	-0.0361226	0.0999656	0.0808114	-0.227098	-0.0860286	0.0951366	-0.112358	-0.00831125	-0.340738
YDL006W	PTC1	-0.104971	0.114113	0.0959292	-0.202776	0.11242	0.162693	-0.0365924	0.095876	-0.134255	0.165321
YDL005C	MED2	0.407246	0.169563	-0.000263106	-0.0949337	-0.253089	0.0334417	0.00751059	-0.478234	-0.108887	-0.00233893
YDL004W	ATP16	-0.176182	-0.615296	-0.0649529	0.0860764	0.16503	0.914901	-0.666255	-0.0103848	-0.482387	0.27885
YDL003W	MCD1	0.0591087	0.130594	-0.375292	-0.0309291	-0.823896	-0.0977919	-0.509592	-0.507966	-0.0531396	-0.380954
YDL002C	NHP10	-0.367509	-0.537692	0.0122163	0.171729	0.42616	0.207651	-0.682275	-0.127366	-0.680533	0.270326
YDL001W	RMD1	-0.15342	0.291072	0.0341281	0.0133213	0.0386908	0.121206	-0.200943	-0.204884	0.0915784	0.237175
YDR001C	NTH1	0.599069	0.858749	0.0023692	1.22753	0.487166	0.682161	0.518245	0.410501	0.566061	-0.285302
YDR002W	YRB1	-0.201168	-0.553815	-0.0424692	-0.0403235	0.267722	-0.201956	-0.509043	-0.253848	-0.506614	-0.0789412
YDR003W	RCR2	-0.047834	-0.129269	0.25325	0.186394	0.834128	0.288543	-0.106799	-0.0915855	-0.0836233	0.276207
YDR003W-A	YDR003W-A	-1.0762	-0.352182	0.0976795	1.03663	1.39726	0.338352	-0.472983	0.177951	-0.293806	0.720612
YDR004W	RAD57	-0.309527	-0.0252798	-0.00208193	-0.349015	0.397406	-0.00215325	-0.27226	0.200441	-0.370153	0.416508
YDR005C	MAF1	0.277085	0.258357	0.133547	0.0656364	0.385161	0.0720693	0.0107303	0.103563	-0.00997427	0.272701
YDR006C	SOK1	0.304074	0.283122	-0.0725738	0.390993	-0.770566	0.0893315	0.327479	-0.289338	0.138152	-0.413327
YDR009W	GAL3	1.68085	-1.11671	0.428959	2.52931	1.30159	2.43333	0.761363	0.205165	0.165357	0.561283
YDR011W	SNQ2	0.448463	0.270435	0.00160011	-0.494815	0.324613	-0.387263	0.962802	-0.68466	0.609094	-0.606759
YDR012W	RPL4B	-0.306419	-0.37439	-0.00402879	0.124726	-0.21694	0.104296	-0.219691	0.0228403	-0.19827	-0.0361865
YDR013W	PSF1	-0.152172	-0.171445	-0.040534	-0.305737	0.465371	-0.26115	-0.668549	0.0266547	-0.553963	0.389298
YDR014W	RAD61	0.180723	0.456858	-0.28047	0.629535	0.305743	0.334832	-0.228775	-0.319986	0.217219	-0.535462
YDR016C	DAD1	-1.10468	-1.29892	-0.15177	-0.214075	0.823084	-0.145693	-1.232	0.190875	-1.21682	0.672146
YDR017C	KCS1	0.0735655	0.338024	-0.171439	-0.124513	-0.759003	-0.294789	0.243593	-0.120896	0.012727	-0.0633371
YDR018C	YDR018C	0.706029	0.354755	-0.0740946	1.36188	1.79513	2.62698	-0.536129	0.560681	0.261358	1.6934
YDR019C	GCV1	0.760531	0.702254	0.788175	0.356962	0.0233889	-0.623996	0.95542	1.08312	0.509786	1.65298
YDR020C	DAS2	-0.152613	-0.266031	-0.0421658	-0.50176	-0.186218	-0.104007	-0.325996	-0.290781	-0.575633	0.547901
YDR021W	FAL1	0.11552	0.181013	0.00490161	-0.55085	-0.838427	-0.540206	0.210214	-0.51538	-0.0489765	-0.0719653
YDR022C	CIS1	-1.08655	-0.786413	0.237199	-0.225181	1.36785	0.262927	-0.630627	0.360843	-0.711079	0.399382
YDR023W	SES1	-0.0359876	-0.255072	0.0495537	0.103661	-0.235942	0.170173	-0.0572278	-0.0533044	-0.0434665	-0.197725
YDR025W	RPS11A	-0.496767	-0.900524	-0.123698	0.623196	0.247271	0.380596	-0.759298	-0.160906	-0.602629	0.164904
YDR026C	YDR026C	-0.0293296	-0.172119	-0.0391763	-0.285474	-0.209861	-0.0699875	-0.10525	0.0398226	-0.210165	0.0919196
YDR027C	VPS54	0.226481	0.333316	-0.0605653	-0.547502	-0.461691	-0.228689	0.0964548	-0.122315	0.212785	-0.386925
YDR028C	REG1	0.335208	0.37625	-0.156772	0.0642407	-0.70028	-0.25846	0.340034	-0.624198	0.379948	-0.455013
YDR030C	RAD28	0.595787	0.581154	0.152777	0.336922	0.152863	-0.437364	-0.0405281	-0.643489	0.181312	0.0297301
YDR031W	MIC14	-0.363599	-0.230463	0.0837615	0.757788	1.05541	0.218171	-1.02353	0.391564	-0.885134	0.867897
YDR032C	PST2	0.500219	0.208452	0.191398	1.19297	1.12823	1.0063	-0.248674	0.356037	-0.0663441	0.241678
YDR033W	MRH1	0.975018	0.0818222	-0.209437	0.757049	-0.529604	0.583948	0.534952	-0.773933	0.725353	-0.954621
YDR034C	LYS14	0.163163	0.474833	-0.144085	0.0268908	-0.312248	-0.160116	0.258757	-0.0187468	0.208006	-0.0482661
YDR034C-A	YDR034C-A	0.00185906	-1.90591	0.131383	1.71444	1.86791	0.974411	-1.46037	2.3481	-1.39994	0.167549
YDR034W-B	YDR034W-B	-0.143555	-0.123666	-0.69576	4.92155	3.30388	2.71965	-0.117627	2.55991	-1.35365	1.61074
YDR035W	ARO3	-0.30371	-0.182	0.0702309	0.318825	-0.203469	0.00137545	-0.0711801	0.0465927	-0.196342	-0.0364947
YDR036C	EHD3	0.0418285	-0.00296947	0.0564946	-0.119259	-0.273165	0.0284732	0.123472	-0.0967902	0.102664	-0.690292
YDR037W	KRS1	-0.156638	-0.339743	0.00466968	-0.0799577	-0.771255	-0.240694	0.0718079	0.0604935	-0.00973269	-0.363333
YDR038C	ENA5	-0.0686337	0.390657	-0.114616	0.0344891	-0.312755	-0.153372	0.614227	0.0150346	0.480282	-0.22748
YDR041W	RSM10	-0.0472026	-0.163655	0.0332084	0.2472	0.738654	0.400976	-0.63846	-0.24382	-0.333373	0.222602
YDR042C	YDR042C	-0.14536	-0.868269	0.0347607	-0.276428	0.446732	0.499994	1.81362	2.48148	0.0683266	-0.896933
YDR043C	NRG1	0.715676	0.120244	-0.226354	1.96143	1.06955	1.23908	0.0331719	0.270571	-0.553898	1.70889
YDR044W	HEM13	-0.0711093	-0.674704	-0.0204525	-1.4695	0.338719	-0.643174	-0.332733	-0.000463779	-0.561044	-0.273484
YDR045C	RPC11	-0.601581	-0.758683	0.129726	-0.18734	0.235559	-0.309083	-0.432654	0.279244	-0.739629	0.405158
YDR046C	BAP3	0.674295	0.798829	-0.126852	0.352652	-0.240788	0.757798	0.67091	-0.260395	0.530599	-0.635416
YDR047W	HEM12	-0.0308617	-0.249699	-0.0311341	-0.370947	-0.086475	-0.00171812	-0.324248	-0.459353	-0.231623	-0.26341
YDR049W	VMS1	0.23581	0.250165	-0.200051	-0.0946292	-0.241256	-0.224344	0.153078	-0.108116	0.172783	-0.355698
YDR050C	TPI1	-0.527794	-0.697931	-0.0628061	0.434987	0.0692171	0.396256	-0.375267	-0.0604893	-0.500152	-0.0762806
YDR051C	DET1	0.146966	-0.121664	0.0394577	0.235042	0.0788411	-0.00173934	-0.347153	-0.0326406	-0.281632	0.0255419
YDR052C	DBF4	0.0707562	0.357062	-0.0817453	0.034535	-0.612013	-0.252729	-0.108932	-0.111852	0.0496146	-0.136302
YDR054C	CDC34	0.0480465	-0.244069	-0.00469487	0.200301	0.0729464	0.0824332	-0.202038	-0.115365	-0.316006	0.135577
YDR055W	PST1	1.54134	1.61679	0.0333388	2.03338	0.632089	1.01954	0.525826	0.425408	0.842831	-0.0837053
YDR056C	YDR056C	-0.159082	-0.410403	-0.171133	-0.106048	0.2313	-0.110274	-0.239144	-0.106234	-0.147557	-0.298977
YDR057W	YOS9	0.647296	0.844491	0.0429348	-0.231002	-0.0390826	-0.0450572	0.522457	-0.043993	0.488729	0.000659291
YDR058C	TGL2	0.471704	0.264123	0.104816	0.345688	1.4925	0.992875	0.069464	0.688917	0.0219368	-0.431971
YDR059C	UBC5	-0.629813	-0.548537	0.269572	1.0741	0.829958	1.06578	-0.0585328	0.935623	-0.4292	0.68267
YDR060W	MAK21	-0.0843049	-0.044344	-0.0788011	-0.274355	-0.950532	-0.66586	0.316983	-0.410288	0.0550167	-0.498968
YDR061W	YDR061W	-0.801342	0.141207	0.112285	-0.22576	0.0290174	-0.281455	-0.0447911	0.104242	0.163602	-0.178829
YDR062W	LCB2	0.425958	0.250876	-0.279815	-0.276358	-0.545745	-0.246882	0.368674	-0.472022	0.407611	-0.790304
YDR063W	AIM7	-0.145458	-0.797425	-0.11905	-0.121767	0.349296	0.272895	-0.934597	-0.25316	-0.569506	0.0841534
YDR064W	RPS13	-0.635899	-0.927207	-0.147588	0.603856	0.325969	0.637239	-0.570627	-0.160837	-0.684389	0.305487
YDR065W	RRG1	-0.00042942	-0.316243	0.0519452	-0.0437265	0.2827	0.250572	-0.263832	0.513097	-0.481525	0.71381
YDR066C	RTR2	-0.431592	-0.80863	0.192367	-0.403575	0.283195	-0.165598	-0.496304	0.00628665	-0.346406	-0.0442509
YDR067C	OCA6	-0.286664	-0.109746	0.0920295	0.616735	0.412755	0.396829	-0.660841	0.118502	-0.56707	0.885085
YDR068W	DOS2	0.0600236	-0.145211	0.0288722	-0.0387513	0.1243	-0.0693705	-0.272118	-0.234946	-0.247523	0.196122
YDR069C	DOA4	0.337563	0.417276	0.0801523	-0.104827	0.00457768	-0.0476565	0.230545	0.110235	0.484425	-0.396557
YDR070C	FMP16	-0.942984	-1.4672	0.41776	1.1585	1.72652	1.52965	-1.56013	0.622914	-1.05863	0.697672
YDR071C	PAA1	-0.384984	-0.720784	-0.0287161	0.46583	0.24165	-0.0355309	-0.57299	0.0485709	-0.388525	0.0292112
YDR072C	IPT1	0.590196	0.499129	0.0128813	0.0314681	0.162642	0.527121	0.631555	0.309627	0.186631	-0.145404
YDR073W	SNF11	-0.298869	-0.562142	-0.0195734	0.0493226	0.420896	0.261007	-0.159931	0.285727	-0.702858	0.746173
YDR074W	TPS2	0.795437	0.838878	-0.0126638	0.97041	0.508895	1.04576	0.481013	-0.0421835	0.711001	-0.0186585
YDR075W	PPH3	0.250394	0.237097	0.0201193	-0.241808	-0.161921	-0.0653279	0.00909521	-0.252489	-0.105171	0.000808706
YDR076W	RAD55	-0.367598	0.275402	-0.126735	-0.547435	0.22525	0.164956	-0.0238441	0.332121	-0.0279234	0.208407
YDR077W	SED1	0.531986	0.574432	0.321958	1.75766	-2.19063	1.80693	0.117535	0.531889	0.27143	1.12835
YDR078C	SHU2	-0.528257	-0.298703	0.108122	-0.00493405	0.716159	-0.390818	-0.108887	0.442708	-0.783359	0.825643
YDR079C-A	TFB5	-0.500912	-1.19374	-0.0178496	0.552616	0.675931	0.442372	-0.546544	0.39052	-1.26504	0.580384
YDR079W	PET100	-0.586088	-0.481082	0.0474111	0.472313	0.578447	0.132899	-0.652922	-0.0348057	-0.838822	0.372444
YDR080W	VPS41	-0.280232	-0.000714775	-0.193436	0.224715	-0.201522	-0.503238	0.127213	0.0452028	0.0832794	-0.166604
YDR081C	PDC2	-0.00471255	0.27258	-0.194888	0.255444	-0.570487	-0.124748	0.239966	-0.324319	-0.0508749	-0.33655
YDR082W	STN1	-0.210337	0.0112176	0.021502	-0.112084	0.159718	0.0569683	-0.0766604	0.140576	-0.500797	0.940499
YDR083W	RRP8	-0.291948	-0.263722	0.0125121	-0.17155	-0.905464	-0.508642	0.135227	-0.270222	-0.0201643	-0.100866
YDR084C	TVP23	0.031204	-0.197372	-0.0954965	-0.302735	0.453138	0.0337289	-0.324238	-0.0389206	-0.0461785	-0.280793
YDR085C	AFR1	-0.355648	-0.0512865	-0.101176	1.03504	0.222792	0.989224	-0.291305	0.559777	-0.0957501	-0.0265531
YDR086C	SSS1	-0.975416	-1.04645	-0.192733	0.211762	0.241343	-0.174235	-0.763797	-0.0854742	-0.795568	0.192308
YDR087C	RRP1	-0.173656	-0.357474	0.0010458	-0.670717	-0.596087	-0.480725	-0.16118	-0.443559	-0.358367	-0.144719
YDR088C	SLU7	-0.102965	0.320877	0.169062	0.149235	-0.160044	0.236521	-0.210332	-0.495684	-0.0547782	0.411216
YDR089W	YDR089W	0.39243	0.278076	0.204836	-0.0576248	-1.09352	-0.400675	0.126613	0.0820008	0.0291992	0.155258
YDR090C	YDR090C	0.341191	0.122797	0.119354	-0.0184774	0.477992	0.279608	0.266488	0.0637743	0.176839	0.121357
YDR091C	RLI1	0.595451	0.165129	-0.324295	0.0159918	-0.653906	-0.394597	0.204182	-0.315288	0.33443	-0.795835
YDR092W	UBC13	-0.389625	-0.792482	-0.0531545	-0.352168	0.373593	0.0129714	-0.662034	-0.25032	-0.512082	0.0201617
YDR093W	DNF2	0.562154	0.303417	-0.187637	-0.653552	-0.548218	-0.237597	0.566821	-0.218854	0.44398	-0.662361
YDR096W	GIS1	0.57236	0.743053	-0.151969	0.117505	-0.929306	0.431487	0.0540031	-0.395318	0.294022	-0.406626
YDR097C	MSH6	0.335086	0.521496	-0.299375	0.0396057	-0.783865	-0.570435	0.306636	-0.738472	0.519536	-0.743395
YDR098C	GRX3	0.0318913	-0.328071	-0.119471	-0.292792	-0.200063	-0.353538	-0.0986777	0.152561	-0.307776	-0.283266
YDR099W	BMH2	-0.277153	-0.291165	0.0371348	0.447776	0.269519	0.252272	-0.171714	0.0591226	-0.283884	-0.0421231
YDR100W	TVP15	0.0240285	-0.0808298	-0.0984178	0.453145	0.667214	0.442466	-0.293984	0.229206	-0.070989	0.0436791
YDR101C	ARX1	-0.0393799	-0.0580931	-0.0524451	-0.276882	-0.664808	-0.320847	0.187409	-0.261415	0.0995859	-0.527009
YDR103W	STE5	-0.0572941	0.673439	-0.0757299	0.237944	-0.412318	-0.187135	0.236018	-0.303371	0.263557	-0.251229
YDR104C	SPO71	0.576637	0.226769	-0.180378	0.526944	0.0235603	-0.454712	0.143767	-0.390352	0.502963	-0.571544
YDR105C	TMS1	0.546096	0.754512	-0.0520679	-0.429847	-0.00460442	-0.259465	0.475903	-0.0829174	0.481595	-0.249658
YDR106W	ARP10	-0.892856	-0.170028	-0.0612944	0.00571187	-0.384815	-0.0511251	0.664621	1.09399	-0.418828	-0.00672097
YDR107C	TMN2	0.745823	1.14944	-0.0294136	-0.0210285	0.347805	0.19056	-0.203727	-1.39291	0.861541	-0.0560995
YDR108W	TRS85	0.323338	0.548438	-0.258188	-0.0277665	0.011962	-0.000586452	0.135109	-0.601748	0.237411	-0.515053
YDR109C	YDR109C	-0.261031	0.36375	-0.335328	0.0770501	-0.230868	0.186705	0.162217	-0.0709025	0.136265	-0.323431
YDR110W	FOB1	0.205217	0.289535	-0.145533	-0.576484	-0.660915	-0.414791	-0.029592	-0.466869	-0.0804771	-0.393799
YDR111C	ALT2	-0.379777	-0.0851583	-0.316712	-0.0553732	-0.107451	0.398994	0.611176	0.207903	0.149081	-0.854121
YDR113C	PDS1	-0.146708	0.24183	-0.101529	-0.171414	-0.248468	-0.0343399	-0.810199	-0.735082	-0.434033	0.13205
YDR115W	YDR115W	-0.506048	-0.704315	-0.042785	0.162084	0.713816	0.257213	-0.748812	0.123216	-0.925	0.257873
YDR116C	MRPL1	0.212169	-0.222049	0.173932	-0.202706	0.43442	0.292448	-0.606855	-0.0540182	-0.339524	0.0991882
YDR117C	TMA64	0.201907	0.00791287	-0.144625	0.0358585	-0.17668	0.05153	-0.236521	-0.546557	-0.00637494	-0.527589
YDR118W	APC4	0.143422	-0.058181	-0.105907	0.0118354	0.0366941	0.191104	0.0774001	0.106016	0.0494412	0.0505752
YDR119W	VBA4	0.236705	0.481011	-0.0185674	-0.190614	-0.495875	-0.612427	0.356574	-0.4925	0.654064	-0.370157
YDR120C	TRM1	0.0548294	-0.191172	-0.0655999	-0.756388	-0.709672	-0.692211	0.103452	-0.354229	-0.0284652	-0.70297
YDR121W	DPB4	-0.231479	-0.312979	-0.0186472	-0.228722	0.0357138	-0.236596	-0.339299	-0.247449	-0.375693	0.115953
YDR122W	KIN1	0.456738	0.581231	-0.0847657	0.423181	0.192543	0.478875	0.196954	-0.229581	0.579641	-0.41543
YDR123C	INO2	-0.153032	-0.133644	0.0174233	-0.146965	-0.198635	0.207968	-0.341466	-0.411619	-0.545884	0.909053
YDR124W	YDR124W	-0.0616869	-0.285544	-0.376425	0.525539	0.0973214	-0.292866	0.605311	0.885469	-0.186165	0.70881
YDR125C	ECM18	0.34483	-0.306761	-0.117165	0.370722	0.707954	0.906749	-0.161526	0.22717	-0.290138	-0.365
YDR126W	SWF1	0.0951042	-0.0685883	0.304786	0.111643	0.32444	0.021935	0.426677	0.623231	-0.129396	0.620755
YDR127W	ARO1	-0.453467	-0.141243	-0.0225567	0.182957	-0.323055	-0.45086	0.257656	-0.26186	0.264308	0.0978673
YDR128W	MTC5	-0.137816	-0.0300229	0.0532039	0.0190369	-0.158022	-0.281596	0.297271	-0.230665	0.194242	-0.454369
YDR129C	SAC6	0.24961	0.420148	-0.122703	0.597928	0.257453	0.320358	0.337689	-0.172861	0.442789	-0.418365
YDR130C	FIN1	-0.249547	0.0555754	0.212743	0.157134	0.434279	0.44494	-0.684677	-0.160808	-0.459158	0.727984
YDR131C	YDR131C	0.0770507	0.129215	-0.109712	-0.244316	0.216296	0.221381	0.0414301	-0.179886	0.0477073	-0.290452
YDR132C	YDR132C	0.120038	0.14364	0.408724	-0.0385453	0.589593	0.104967	1.02865	-0.105749	0.386884	-0.0785899
YDR135C	YCF1	0.804615	0.701059	0.050494	-0.537005	0.0873591	-0.612339	1.48144	-0.65274	1.02344	-0.947192
YDR137W	RGP1	-0.0530316	-0.0455556	-0.323431	-0.0870087	-0.385442	-0.0316116	-0.215536	-0.458637	-0.0116816	-0.380793
YDR138W	HPR1	0.68781	-5.41511	-0.389454	-0.183181	-0.223778	-0.30268	0.221433	-0.38848	0.149574	-0.67939
YDR139C	RUB1	-1.14481	-1.42971	-0.158864	0.220818	0.774241	0.11022	-1.06226	0.135633	-1.23343	0.365811
YDR140W	MTQ2	-0.720929	-0.489006	0.121101	-0.282354	0.326336	-0.219394	-0.371237	0.0146604	-0.535785	0.119466
YDR141C	DOP1	0.332352	0.407398	-0.263694	0.118557	-0.276801	-0.117634	0.504646	-0.267153	0.335083	-0.475775
YDR142C	PEX7	-0.169909	-0.144402	0.0187331	0.14671	0.182529	0.393845	-0.268068	0.0995861	-0.359243	0.146649
YDR143C	SAN1	-0.646368	0.261464	-0.37297	0.277358	-0.552625	0.299559	0.139103	-0.0905022	-0.0893923	-0.600945
YDR144C	MKC7	1.01607	0.769852	-0.0173128	-0.63568	-0.387593	-0.439379	0.937977	-0.463227	0.716687	-0.41402
YDR145W	TAF12	-0.156743	0.070748	0.0299725	-0.0134254	-0.153007	-0.0589879	-0.169767	0.0879234	-0.0210928	0.138519
YDR146C	SWI5	0.14373	0.248157	-0.193267	0.409181	-0.518759	-0.0636868	0.223891	-0.328989	0.244887	-0.1795
YDR147W	EKI1	-0.120442	0.0755447	-0.108765	-0.401024	0.0942419	-0.286844	0.168581	-0.0710444	0.00407506	0.277281
YDR148C	KGD2	0.477482	0.227279	-0.0276429	0.262778	0.0741256	0.508449	-0.0616413	-0.238127	0.28385	-0.376576
YDR150W	NUM1	0.492506	0.166296	-0.231965	0.267245	-0.468535	-0.132829	0.570206	-0.397937	0.555078	-0.47346
YDR151C	CTH1	0.155261	-0.231512	0.0334768	0.296584	0.0144293	0.118604	-0.00646587	-0.0463554	-0.211004	0.31116
YDR152W	GIR2	-0.427185	-0.50075	-0.105072	-0.0171546	-0.224551	-0.207854	-0.372104	-0.0926439	-0.445035	0.0625514
YDR153C	ENT5	0.334775	0.173381	0.13661	0.659621	-0.0600167	0.226523	0.0791376	-0.277329	-0.0460419	0.175104
YDR155C	CPR1	-0.731448	-0.949811	-0.142583	-0.42205	0.0453272	-0.123262	-0.522125	-0.0635461	-0.598006	-0.240629
YDR156W	RPA14	-0.475324	-0.851015	-0.0738149	0.0814488	0.247744	-0.0637221	-0.646516	-0.166374	-0.792846	0.170308
YDR158W	HOM2	-0.407076	-0.649727	0.0240561	-0.452566	-0.736293	-0.907159	-0.0757113	0.383672	-0.323405	0.0499262
YDR159W	SAC3	0.0564192	0.123422	-0.165789	-0.0606112	-0.610363	-0.285553	0.00582566	-0.101889	0.0532964	-0.595149
YDR160W	SSY1	-0.22878	0.405282	-0.215392	0.0477242	0.161623	-0.23	0.402183	-0.0107875	0.184448	-0.350985
YDR161W	YDR161W	-0.0425235	-0.169958	-0.153763	-0.894062	-0.639194	-0.528652	-0.163691	-0.463908	-0.244546	-0.421319
YDR162C	NBP2	-0.274602	0.122171	0.0595947	0.447731	0.331496	0.093629	-0.183204	-0.0243646	-0.416907	0.489143
YDR163W	CWC15	-0.191189	-0.280075	-0.0712812	0.0177302	0.21906	-0.196841	-0.437368	-0.229737	-0.555382	0.528722
YDR164C	SEC1	0.166532	-0.0410579	-0.0241972	0.152985	-0.228035	-0.154598	0.168093	-0.169174	0.248227	-0.283893
YDR165W	TRM82	-0.291424	-0.0996545	-0.121388	-0.171395	-0.639276	-0.322267	0.101389	-0.131134	-0.135534	-0.204954
YDR166C	SEC5	0.2506	0.475636	-0.184848	0.0329333	-0.323932	-0.13118	0.344012	-0.117058	0.28018	-0.390754
YDR167W	TAF10	-0.188581	-0.422661	-0.0178129	-0.144316	0.0946694	-0.126631	-0.4208	-0.648302	-0.456811	0.0675969
YDR168W	CDC37	0.0800438	-0.182834	0.124932	-0.702405	-0.47284	-0.344859	-0.0157973	-0.0578512	-0.0418544	-0.10637
YDR169C	STB3	0.3135	0.858406	-0.201682	0.12986	-0.229491	0.161391	0.220095	-0.401959	0.332311	-0.0477332
YDR169C-A	YDR169C-A	-0.97865	-0.910395	-0.14682	1.07227	0.870326	0.794821	-0.0824345	0.582247	-0.902292	0.60269
YDR170C	SEC7	0.342376	-0.0232263	-0.173509	0.0051772	-0.435182	-0.134975	0.310679	-0.610453	0.314215	-0.587727
YDR171W	HSP42	-0.932794	-1.53077	-0.844706	-1.14023	0.32352	-0.70469	-0.795622	-0.941776	-0.326193	-1.14012
YDR172W	SUP35	0.330128	-0.212382	-0.260085	0.142041	-0.469254	-0.138214	-0.0392286	-0.531368	-0.000732285	-0.690424
YDR173C	ARG82	0.000483681	0.452258	0.118299	-0.426793	-0.24652	-0.352552	0.474353	1.14858	-0.192775	0.0238929
YDR174W	HMO1	-0.441005	-0.819458	-0.137324	0.343207	-0.0838646	0.429404	-0.374657	0.04009	-0.42163	0.658975
YDR175C	RSM24	0.0587507	0.0275678	0.143151	0.129102	0.281534	0.347861	-0.312591	0.00127193	-0.213826	0.300186
YDR176W	NGG1	-0.222599	0.115167	-0.0563616	-0.345342	-0.666613	-0.481408	-0.330703	-0.259439	-0.0293843	-0.0783191
YDR177W	UBC1	-0.274852	-0.225281	0.194524	0.166334	0.0879485	-0.017027	-0.0996802	0.204933	-0.35084	0.0699316
YDR178W	SDH4	0.450525	-0.373182	0.219365	0.896399	0.85782	1.10095	-0.284529	0.268334	-0.0248595	0.338312
YDR179C	CSN9	-0.909541	-0.482903	0.140314	-0.159552	0.271431	-0.441073	-0.888494	0.0533604	-0.940955	0.589669
YDR179W-A	YDR179W-A	-0.312061	0.11355	0.153744	-0.659342	-0.0814079	-0.19591	-0.0350537	-0.107769	-0.297805	0.0778675
YDR180W	SCC2	-0.378277	0.206939	-0.356084	-0.235784	-0.648509	-0.582315	0.245266	-0.574934	0.181086	-0.977353
YDR181C	SAS4	-0.0717767	0.0144365	0.010557	0.0322412	0.00968693	-0.0414651	-0.199132	-0.0357867	-0.326662	0.190374
YDR182W	CDC1	0.674753	0.60167	-0.0837069	-0.278556	-0.114745	-0.3494	0.597399	-0.526135	0.706281	-0.564756
YDR182W-A	YDR182W-A	0.0953144	-0.0206247	-0.491669	0.701676	0.588191	-0.120675	0.68527	0.173815	-0.251125	0.449838
YDR183W	PLP1	-0.556249	-0.706216	-0.00906379	-0.358147	0.0702522	-0.0713406	-0.516986	0.191267	-0.629628	0.135921
YDR184C	ATC1	-0.294041	-0.223133	-0.0423421	-0.359396	-0.793597	-0.0629875	-0.238405	-0.145546	-0.224799	0.205132
YDR185C	UPS3	0.960905	0.713237	0.273704	1.2518	0.899057	1.16607	0.376032	1.03482	-0.469399	0.805695
YDR186C	YDR186C	0.0343848	0.16892	-0.13261	-0.0164589	-0.676966	-0.280312	0.19559	-0.0577602	0.0189996	-0.523278
YDR188W	CCT6	0.0639843	-0.196245	-0.0433388	-0.0955506	-0.179847	0.114375	-0.156026	0.0626495	0.0140738	-0.64811
YDR189W	SLY1	0.236891	0.132329	-0.266749	-0.214378	-0.450916	-0.314274	0.00241567	-0.684231	0.132509	-0.627088
YDR190C	RVB1	0.105529	-0.175838	-0.0268402	-0.0194342	-0.427072	-0.140548	-0.172102	-0.276258	-0.0571448	-0.297842
YDR191W	HST4	-0.206946	0.238844	0.0147372	0.430019	-0.259868	0.69614	-0.253659	-0.0943765	-0.214178	0.409512
YDR192C	NUP42	0.139678	0.0940272	0.133871	0.17236	-0.122963	0.029737	-0.393575	-0.387321	0.126898	-0.0354065
YDR194C	MSS116	0.0272249	0.0378197	-0.124624	-0.211368	-0.253301	-0.202522	-0.01136	-0.196589	0.0836755	-0.662651
YDR194W-A	YDR194W-A	-0.570588	-0.624951	-0.170884	1.03896	0.854641	0.705507	-0.305909	0.52853	-0.723096	0.499964
YDR195W	REF2	-0.16738	0.349485	0.0312082	0.503318	-0.200531	0.315103	0.420292	0.354257	-0.298795	0.175127
YDR196C	CAB5	-0.448775	-0.546576	-0.0856649	-0.00362412	0.172957	0.0305154	-0.660625	0.0326549	-0.516599	0.112719
YDR197W	CBS2	-0.135547	-0.0401762	0.225035	0.237715	0.0931172	0.251943	-0.581527	-0.0508017	-0.327419	0.20047
YDR198C	RKM2	-0.029884	0.144976	0.0665969	-0.328625	-0.0020947	-0.212929	-0.0139503	0.0901537	-0.276074	-0.00264487
YDR200C	VPS64	0.00309777	0.156716	-0.0775213	-0.22557	-0.0841476	0.123054	-0.23049	-0.131371	-0.100926	-0.0488955
YDR201W	SPC19	-0.437649	-0.43256	-0.0680309	-0.340804	0.719896	-0.084189	-0.715365	0.0011735	-0.628096	0.114533
YDR202C	RAV2	-0.0996301	0.00672602	-0.0143529	-0.0518923	0.266185	0.0430723	-0.390191	0.100655	-0.268639	-0.337625
YDR204W	COQ4	-0.127702	-0.0052976	0.0814144	-0.129682	0.524683	0.177135	-0.722478	0.0755635	-0.127805	-0.365122
YDR205W	MSC2	0.509255	0.551227	-0.0405487	-0.246139	0.0277137	-0.162587	0.869634	-0.214691	0.892641	-0.189396
YDR206W	EBS1	0.032241	0.168293	-0.280935	-0.483604	-0.46796	-0.440265	0.310511	-0.171266	0.143155	-0.524976
YDR207C	UME6	0.272203	0.136718	-0.126904	-0.941945	-0.631861	-0.424152	0.00482209	-0.754165	0.26571	-0.322341
YDR208W	MSS4	0.0706444	0.194316	-0.0999805	-0.132545	-0.673787	-0.137936	0.0296872	-0.199795	0.164595	-0.450724
YDR210W	YDR210W	-1.26181	-1.19912	-0.201669	-0.393319	0.677989	-0.167111	-0.857448	-0.209892	-0.98463	0.486522
YDR211W	GCD6	0.239704	0.0751697	-0.120322	-0.230209	-0.589174	-0.538741	-0.00981895	-0.138503	-0.0587831	-0.402102
YDR212W	TCP1	0.101961	0.0147773	-0.0139686	-0.299219	-0.312626	-0.063873	0.115188	-0.1784	0.133877	-0.54428
YDR213W	UPC2	0.36077	-0.115153	-0.0883057	-0.501493	0.0380044	-0.390386	0.169953	0.210612	0.0568795	-0.149644
YDR214W	AHA1	0.0525792	-0.614177	-0.0176746	-0.150519	-0.148857	-0.330503	0.059318	0.307869	0.0298434	-0.116304
YDR216W	ADR1	1.01973	0.594128	-0.761097	1.88128	-1.05834	1.37229	0.688284	-0.460695	1.258	0.00152087
YDR217C	RAD9	0.00717651	0.278916	-0.0806779	-0.386353	-0.497715	-0.732349	0.351838	-0.398594	0.209935	-0.456605
YDR218C	SPR28	-0.350602	-0.352808	-0.129886	0.40752	0.415308	0.393677	-0.0227108	0.639879	-0.10766	0.588118
YDR219C	MFB1	0.0635176	0.6039	-0.100567	0.27872	0.004043	0.363388	-0.14545	-0.356484	0.0809704	0.016548
YDR221W	GTB1	0.335214	0.494743	-0.130243	0.102451	-0.228352	-0.718171	0.647678	-0.460698	0.795288	-0.516979
YDR222W	YDR222W	0.546096	-0.181407	-0.116838	-1.30065	-2.18039	-0.656919	0.434125	-0.0244004	0.381715	0.236656
YDR223W	CRF1	-0.179287	0.0563755	0.219149	0.17082	1.20249	0.94532	0.711015	-0.0878249	-0.0168074	-0.349917
YDR224C	HTB1	-0.572987	-0.877031	-0.242552	0.0935225	-0.691299	0.282942	-0.576395	-0.163936	-0.769954	-0.0246988
YDR225W	HTA1	-0.437308	-0.905712	-0.0465186	0.4512	-0.903923	0.279553	-0.589598	-0.198861	-0.638182	0.00842148
YDR226W	ADK1	-0.449285	-0.821742	-0.021797	-0.365406	0.00253253	-0.201764	-0.493082	-0.19797	-0.549728	-0.17376
YDR227W	SIR4	0.105178	0.263741	-0.0193098	-0.151341	-0.41094	-0.58372	0.470619	-0.234337	0.455348	-0.409818
YDR228C	PCF11	0.230876	0.453082	-0.060809	-0.107364	-0.15752	-0.0519362	0.369847	0.100304	0.133811	-0.0301916
YDR229W	IVY1	0.00255772	0.217629	-0.136605	-0.100615	-0.250228	-0.00405395	-0.200699	-0.337385	0.0066765	0.0476292
YDR231C	COX20	0.149918	0.269723	0.119685	0.345737	1.04789	0.813799	-0.122026	0.714811	-0.212617	0.548037
YDR232W	HEM1	0.0945108	0.000718753	-0.201447	-0.347674	-0.21964	-0.260601	0.319784	-0.299847	0.117074	-0.707808
YDR233C	RTN1	0.188836	-0.0260724	-0.0324648	0.238863	-0.107678	-0.0808531	0.210703	-0.125591	0.0470945	-0.160539
YDR234W	LYS4	-0.0549327	-0.283694	-0.168571	-0.300433	-0.416165	-0.474668	0.412405	0.0116248	0.0739245	-0.49508
YDR235W	PRP42	-0.4399	0.0869974	0.26767	-0.114669	-0.125687	0.0606753	-0.15769	-0.167137	-0.151675	-0.158877
YDR236C	FMN1	-0.457003	-0.669444	0.113961	0.0393274	0.875897	-0.152243	-0.354257	0.0300242	-0.29435	0.690982
YDR237W	MRPL7	0.0510793	-0.0429333	0.159727	-0.010487	0.274248	0.256982	-0.325833	-0.166346	-0.213369	-0.0226365
YDR238C	SEC26	-0.0353698	-0.0561225	-0.107001	-0.206588	-0.401851	-0.416211	0.183164	-0.484219	0.229084	-0.546931
YDR239C	YDR239C	0.182334	0.251925	0.00721561	-0.728976	-0.439453	-0.644678	0.252994	-0.348401	0.143437	-0.146519
YDR240C	SNU56	-0.095841	0.0197981	-0.0446695	0.264814	0.032996	0.194065	-0.206763	-0.106797	-0.234228	0.122906
YDR242W	AMD2	0.106612	-0.189632	0.40964	0.0613381	0.509784	0.266313	-0.881431	-0.0162251	0.0682138	0.600595
YDR243C	PRP28	0.0453	-0.013138	-0.0276495	-0.335066	-0.445174	-0.596201	-0.343208	-0.590621	-0.015913	-0.240692
YDR244W	PEX5	0.404206	0.363963	0.146214	0.0976575	0.0245591	-0.156836	0.142601	-0.102358	0.142838	-0.126869
YDR245W	MNN10	0.245059	0.0748159	-0.061348	-0.410654	-0.288885	-0.497219	0.32171	-0.284161	0.105275	-0.143039
YDR246W	TRS23	0.0113082	-0.178404	0.191538	0.0703328	0.264545	-0.00756048	-0.380931	-0.231102	-0.408989	0.479571
YDR246W-A	YDR246W-A	-0.957064	-0.54939	-0.193216	0.775991	1.45325	0.45351	0.049991	-0.214394	-0.72736	0.849246
YDR247W	VHS1	0.591963	0.854209	-0.032477	0.661725	-0.501031	0.760316	0.251383	-0.58803	0.331636	-0.186481
YDR248C	YDR248C	-0.597254	-1.13823	0.171845	0.348015	0.696107	-0.111896	-0.173873	0.218271	-0.305878	0.28137
YDR249C	YDR249C	-0.574496	-0.225737	0.0972066	-0.244975	0.0803216	0.506585	0.0277285	0.407961	-0.327073	0.728254
YDR251W	PAM1	-0.0350592	0.342364	0.0608627	0.154639	-0.456373	0.125525	-0.0467564	0.00743422	0.0524453	-0.153559
YDR252W	BTT1	-0.50308	-0.501197	0.134556	0.277645	0.752907	0.448348	-0.570679	0.269411	-0.792382	1.1973
YDR253C	MET32	-0.794671	-0.311929	0.162484	-0.0809838	-0.572716	0.355432	0.0935407	-0.482477	-0.21953	-0.535576
YDR254W	CHL4	-0.387153	0.172162	0.164327	0.0497195	0.57276	0.190315	-0.158307	0.145027	-0.127136	0.267696
YDR255C	RMD5	0.759774	0.859542	0.114482	1.18816	0.820573	0.955666	-0.343826	-0.0972013	0.265601	0.234472
YDR256C	CTA1	0.348699	-0.24992	-0.495815	-0.123027	0.0293924	-0.18707	0.848576	-0.505471	0.154708	0.0657636
YDR257C	RKM4	0.156581	0.223883	0.0552902	-0.331441	-0.202318	-0.312084	-0.0843541	0.0831385	-0.179933	0.0231959
YDR258C	HSP78	-0.363533	0.386434	-0.23408	-0.486737	0.563764	-0.142046	-0.19775	-0.507477	0.654886	-0.533328
YDR259C	YAP6	1.55817	-0.437409	0.781651	0.968165	-0.276187	0.345857	1.0247	1.88844	-0.0111681	1.45759
YDR260C	SWM1	-0.241707	-0.609388	-0.097736	0.0607255	0.528045	0.61178	-0.946469	-0.521599	-0.69926	0.505443
YDR261C	EXG2	0.295621	0.189726	-0.173887	-0.788323	-0.500622	-0.492444	0.572095	0.246949	0.279091	-0.507845
YDR261C-D	YDR261C-D	-1.65635	-0.270622	0.00359172	0.758623	-0.644497	-0.297467	-0.198762	0.286795	-0.119854	0.26552
YDR261W-B	YDR261W-B	-0.763629	-0.0383428	0.00869811	0.629568	-0.552395	0.0153563	0.0365221	0.364169	-0.147511	0.180332
YDR262W	YDR262W	0.096445	0.313545	-0.0833275	0.134731	0.0932854	0.122994	-0.0676658	0.0913554	-0.156001	0.369362
YDR263C	DIN7	0.734952	0.81994	-0.294967	0.207472	0.294511	0.0244123	0.931853	-0.116156	0.341453	-0.718209
YDR264C	AKR1	0.549694	0.508462	0.254568	0.209675	0.678735	-0.390566	0.751016	0.00584109	0.642784	-0.410614
YDR265W	PEX10	0.166282	0.0192966	0.105266	0.109074	0.747721	0.114052	-0.236693	0.358754	-0.242819	0.61522
YDR266C	YDR266C	0.292048	0.201964	-0.158177	0.00551809	-0.600231	-0.314278	0.269934	-0.365209	0.0488227	-0.457383
YDR267C	CIA1	-0.135017	-0.0800664	0.0598276	-0.273554	-0.236302	-0.277361	-0.361452	-0.230708	-0.397998	0.0916819
YDR268W	MSW1	-0.0897437	-0.169379	0.20727	-0.53578	0.477205	-0.344542	-0.391826	0.070682	0.0507956	0.0696598
YDR270W	CCC2	0.473461	0.569659	0.366545	-0.610984	0.385656	-0.617788	0.447282	0.336824	0.482651	-1.01233
YDR272W	GLO2	-0.0250886	-0.339183	0.0204775	0.246274	0.290792	0.144068	-0.2465	0.0339552	-0.18944	-0.273808
YDR273W	DON1	0.198283	-0.923762	-0.348919	0.185205	0.158128	0.375869	0.318662	-0.528773	0.206198	-0.200653
YDR275W	BSC2	-0.648715	-0.413399	-0.124903	0.190417	1.02459	0.17828	-0.249189	-0.0700979	-0.769631	0.420581
YDR276C	PMP3	-0.698334	-0.849765	-0.0531894	0.898711	0.802135	0.587398	-0.489863	-0.0936617	-0.670356	0.389282
YDR277C	MTH1	1.81563	1.16833	-0.353769	2.61112	0.319754	2.81393	-1.27719	-0.25994	0.128171	0.687889
YDR279W	RNH202	-0.356132	-0.257882	-0.0103072	-0.446198	-0.0319317	-0.305837	-0.388228	-0.041959	-0.304179	-0.219632
YDR280W	RRP45	-0.300242	-0.235753	0.0468087	-0.185427	-0.193226	0.0127979	-0.322766	-0.192079	-0.421903	0.108353
YDR281C	PHM6	-0.212547	-2.4916	1.24912	-1.38463	-0.323789	1.2588	-0.44941	-0.370352	-0.362482	1.03219
YDR282C	YDR282C	-0.399423	-0.259304	0.0623256	-1.00543	0.198785	0.0945478	-0.478031	-0.0624891	-0.345465	0.129538
YDR283C	GCN2	0.0237459	-0.0983936	-0.210336	-0.353392	-0.480126	-0.514812	0.478086	-0.0345579	0.283692	-0.545384
YDR284C	DPP1	0.293669	0.513704	-0.0401382	-0.581024	-0.112894	-0.0392839	0.248725	-0.431597	0.583826	-0.253108
YDR285W	ZIP1	-0.302455	0.249014	-0.0720176	-0.654065	-0.0453165	-0.830499	-0.499241	-0.780193	-0.0632991	0.068228
YDR286C	YDR286C	-0.597893	-0.818909	0.0878294	0.136117	1.16051	0.0271653	-0.855876	0.232091	-0.684918	0.514577
YDR287W	INM2	-0.0174304	0.125912	0.177387	0.00293052	0.659353	0.173244	-0.40503	0.217997	-0.166239	-0.0376157
YDR288W	NSE3	-0.453951	-0.109251	0.0514104	-0.124255	0.146019	0.119936	-0.629635	-0.0756583	-0.632494	0.449905
YDR289C	RTT103	-0.0178911	0.330938	0.0383785	0.0151281	-0.115558	-0.191281	-0.184167	-0.0123076	-0.246134	0.237948
YDR291W	HRQ1	0.328201	0.311205	-0.148296	-0.68954	0.0486923	-0.327651	0.336131	-0.0290782	0.213864	-0.197225
YDR292C	SRP101	0.208574	0.156671	-0.273455	0.028955	-0.381479	-0.336448	0.248335	-0.552188	0.316169	-0.856783
YDR293C	SSD1	0.656559	0.542665	-0.114886	0.361177	-0.528266	-0.0313706	0.681616	-0.159634	0.675156	-0.419351
YDR294C	DPL1	0.465858	0.429137	0.00563881	-0.151915	-0.237654	0.133717	0.608977	0.00133266	0.489226	-0.456028
YDR295C	HDA2	-0.201668	0.351761	-0.0730782	0.149124	-0.482801	-0.178168	0.065966	-0.518288	0.144141	-0.415731
YDR296W	MHR1	0.102211	-0.241673	0.245751	-0.0271843	0.392954	0.359909	-0.468291	0.071934	-0.416817	0.477102
YDR297W	SUR2	0.586495	0.292897	0.0557772	-0.466907	-0.237082	-0.441452	0.275221	0.202398	-0.0171666	0.0263677
YDR298C	ATP5	0.136621	-0.540276	-0.0635232	0.123057	0.188213	0.826088	-0.342983	0.0141174	-0.220842	0.169049
YDR299W	BFR2	0.113093	-0.0433051	-0.0995255	-0.42801	-0.989013	-0.361185	-0.0349327	-0.586775	-0.0921387	-0.339011
YDR300C	PRO1	-0.57147	-0.136074	0.112448	-0.578927	-0.375821	-0.362466	0.0415308	-0.457449	-0.152029	-0.252464
YDR301W	CFT1	0.203754	0.114043	-0.299321	-0.227401	-0.380911	-0.127502	0.321795	-0.114375	0.387335	-0.656218
YDR302W	GPI11	0.170763	0.0590205	0.0760883	-0.830593	-0.138117	-0.0495378	0.208414	-0.374564	0.124243	0.0798002
YDR303C	RSC3	-0.0656039	-0.0691113	-0.216666	-0.484418	-0.771304	-0.745967	0.245832	-0.20935	0.275513	-0.677126
YDR304C	CPR5	0.0759467	-0.108507	-0.112696	-0.195351	0.208982	-0.076328	0.0286458	-0.294276	0.0435142	-0.291958
YDR305C	HNT2	-0.682633	-0.650086	0.210016	-0.362635	0.639811	-0.177498	-0.273624	0.0917203	-0.51185	0.212362
YDR306C	YDR306C	-0.214843	0.030803	0.12201	0.205607	-0.0509129	0.257243	-0.33246	0.0774256	-0.0495663	-0.0407262
YDR307W	YDR307W	0.750479	0.934478	-0.286809	-0.313125	0.127548	-0.0454371	0.768758	-0.76348	0.933686	-0.656987
YDR308C	SRB7	-0.373789	-0.71577	-0.00579564	0.300253	0.593491	0.425472	-0.500939	-0.00855339	-0.668117	0.406072
YDR309C	GIC2	-0.0548979	0.421465	-0.291202	0.293943	-0.895219	0.591225	0.00941975	-0.52209	-0.0340893	0.321026
YDR310C	SUM1	-0.147719	0.0817546	-0.0903151	-0.134308	-0.5383	-0.114771	0.0747534	-0.256936	0.00269102	-0.301394
YDR311W	TFB1	0.358419	0.253126	-0.0728314	0.08204	-0.12404	0.206219	0.0379203	-0.0652443	0.0259454	-0.13446
YDR312W	SSF2	-0.511066	-0.00150867	0.0884772	-0.442406	-0.582769	0.00764219	0.00302967	-0.306584	-0.32959	-0.0435611
YDR313C	PIB1	-0.572695	-0.140502	0.129179	0.0290611	0.35222	0.20322	-0.527443	-0.0297451	-0.326803	0.260168
YDR314C	RAD34	0.66451	0.104781	-0.300272	0.0708747	0.00587691	0.295334	0.191361	-0.20003	-0.131365	-1.08321
YDR315C	IPK1	-0.203275	-0.206792	0.14991	0.0116984	0.727721	-0.211088	-0.578012	1.04707	-0.63285	0.39568
YDR316W	OMS1	0.124578	0.0856397	-0.0157891	0.110853	-0.0456922	0.325488	-0.156121	-0.309298	0.0499285	0.134419
YDR316W-B	YDR316W-B	-0.453567	-0.439782	-0.0188388	0.272069	-0.523165	0.126037	0.00592241	0.047034	-0.222113	-0.142061
YDR317W	HIM1	-1.00466	-1.56185	0.272784	-1.36433	0.604278	-0.312942	-0.100161	-0.180653	-0.220952	-1.20486
YDR318W	MCM21	-0.432298	0.372721	0.0947002	0.000953502	0.255002	0.0635645	-0.405021	-0.231413	-0.281618	0.417918
YDR319C	YDR319C	-0.0839139	0.181615	-0.165769	0.392689	0.793371	0.262057	-0.161391	0.320183	-0.0863369	0.000521424
YDR320C	SWA2	0.503804	0.311811	-0.214445	0.185192	-0.0377255	0.368331	0.106068	-0.288075	0.178637	-0.537376
YDR320C-A	DAD4	-1.10803	-1.17412	-0.134185	0.0753894	0.405524	0.144677	-1.18845	-0.163034	-1.36349	0.530504
YDR321W	ASP1	-0.0453517	-0.173473	-0.0484212	-0.482727	-0.131152	-0.400722	-0.369959	-0.229036	-0.250463	-0.228695
YDR322C-A	TIM11	-0.0498327	-0.80377	0.0391644	0.228612	0.52325	0.871572	-0.872668	-0.539618	-0.599215	0.316243
YDR322W	MRPL35	0.232408	-0.120533	0.00912348	0.0621694	0.109945	0.320848	-0.446954	-0.350724	-0.18404	-0.0880869
YDR323C	PEP7	-0.525549	-0.0954174	0.10947	-0.454807	0.53685	0.0919576	-0.140386	0.488387	-0.322574	0.590612
YDR324C	UTP4	-0.283368	0.246405	0.0574348	-0.330262	-1.13519	-0.533595	0.130432	-0.297325	0.188722	-0.291237
YDR325W	YCG1	-0.189984	0.267932	0.0166476	-0.517115	-0.567793	-0.261614	-0.0581268	-0.343128	-0.0194962	-0.0689019
YDR326C	YSP2	0.385493	0.717418	-0.1557	-0.159502	-0.683188	-0.504403	0.922228	0.0823413	0.654093	-0.683924
YDR328C	SKP1	-0.299057	-0.751902	0.095094	-0.107607	0.310454	-0.0344945	-0.640163	-0.249933	-0.567594	0.169826
YDR329C	PEX3	0.296677	0.213829	0.184444	-0.613442	-0.0440234	-0.172742	-0.237228	-0.0957382	0.0366632	-0.0978686
YDR330W	UBX5	-0.20412	-0.0161629	0.144651	-0.221922	0.0789486	0.133267	-0.263158	0.193048	-0.0678055	-0.644897
YDR331W	GPI8	0.454559	0.152527	-0.0993771	-0.335307	-0.0889607	-0.131661	0.156414	-0.240092	0.150791	-0.406884
YDR332W	IRC3	-0.414806	-0.555166	0.000844731	-0.197846	0.0968191	-0.25907	-0.0851844	0.230468	-0.16287	0.253264
YDR333C	YDR333C	0.0229431	0.16796	-0.165223	-0.0579515	-0.0891292	-0.237346	0.371668	-0.044	-0.0398664	-0.211161
YDR334W	SWR1	-0.265712	-0.0774058	-0.216893	0.0537489	-0.675543	-0.42479	0.18036	-0.0131279	0.209831	-0.75287
YDR335W	MSN5	0.251139	0.308595	-0.150882	0.11751	-0.243517	-0.160646	0.299451	-0.298024	0.478243	-0.519428
YDR336W	YDR336W	-0.353583	-0.608541	0.131249	-0.59755	0.283311	-0.481338	-0.424135	0.10061	-0.517334	0.679475
YDR337W	MRPS28	0.0489098	-0.120693	0.192706	0.00210842	0.196536	0.018871	-0.537079	0.0780797	-0.385719	0.231602
YDR338C	YDR338C	0.0348894	0.541187	-0.0904557	0.00297085	0.0744105	-0.163308	0.503075	-0.357745	0.463906	-0.466009
YDR339C	FCF1	-0.456948	-0.681455	-0.0772575	0.0540694	-0.0929364	0.0281418	-0.458549	-0.0955926	-0.670106	0.175904
YDR341C	YDR341C	0.195842	-0.179164	-0.139903	-0.289767	-0.582874	-0.235838	0.263152	-0.187273	0.0446732	-0.525136
YDR342C	HXT7	1.93825	2.26611	-0.0644666	0.330414	-0.0341643	3.38323	-0.318629	-0.182065	1.08163	1.02109
YDR345C	HXT3	0.661707	-0.253533	-0.10303	-0.0150172	0.204909	-1.15849	0.527629	-0.361665	0.524274	-1.03388
YDR346C	SVF1	-0.377856	0.0958232	-0.010345	-0.165962	-0.186236	-0.33486	0.297715	-0.0542804	0.0937882	-0.357344
YDR347W	MRP1	-0.10646	-0.0961934	0.0302166	-0.319991	0.0278102	-0.146273	-0.511426	-0.0475465	-0.0956119	-0.0501123
YDR348C	YDR348C	-0.112933	0.20672	0.03713	-0.120515	-0.29367	-0.130557	0.0732756	-0.088553	0.123568	-0.314713
YDR349C	YPS7	0.261269	0.441688	0.0770461	0.0110278	-0.148955	-0.104319	0.499718	0.334858	0.256782	-0.0712824
YDR350C	ATP22	0.535877	0.429979	0.0282629	0.8551	0.4262	0.627466	0.0964919	-0.105967	0.211339	0.0594728
YDR351W	SBE2	0.0180108	0.317478	0.138444	0.473174	-0.698819	-0.280051	0.326681	0.086874	0.00360393	0.0289092
YDR352W	YDR352W	0.285256	-0.191927	0.0809194	-1.03965	-0.28668	-0.438248	0.0744498	-0.160712	-0.129518	-0.05192
YDR353W	TRR1	-0.283181	-0.252429	0.177168	-0.554032	0.0525189	0.0941148	0.259982	-0.171828	-0.136463	-0.277442
YDR354W	TRP4	0.379654	0.140021	0.359188	-0.0493112	-0.0526847	-0.264687	-0.0125598	0.394488	-0.0325651	0.0853845
YDR356W	SPC110	0.122778	0.46747	-0.261488	-0.283306	-0.598919	-0.41722	0.0552694	-0.614627	0.208555	-0.742996
YDR357C	CNL1	-1.30423	-1.45103	0.0565282	1.0284	0.112994	0.402305	-0.656059	0.614726	-1.1366	0.68185
YDR358W	GGA1	0.326055	0.668473	0.165365	0.769074	0.732731	0.698452	-0.207741	0.224134	0.378952	-0.131923
YDR359C	EAF1	-0.0540939	-0.322736	-0.137162	0.574514	-0.233516	-0.0489996	-0.111168	-0.189556	-0.00725524	-0.0053395
YDR361C	BCP1	-0.309312	-0.471369	0.0697622	-0.859488	-0.540446	-0.501443	-0.107614	-0.45622	-0.262556	-0.18845
YDR362C	TFC6	0.620021	0.117186	-0.186415	0.121684	-0.0208169	0.0466293	0.232288	-0.206897	0.199921	-0.596736
YDR363W	ESC2	0.168556	-0.118392	-0.145391	0.337769	0.29204	0.0465385	-0.165172	-0.239011	-0.0396917	-0.311269
YDR363W-A	SEM1	-0.960712	-0.807102	0.087969	0.431462	0.642711	0.32077	-0.601266	0.347801	-0.780908	0.530938
YDR364C	CDC40	-0.403163	-0.250908	0.0535476	-0.313649	-0.0702739	-0.0283442	-0.164099	-0.221441	-0.201611	0.197201
YDR365C	ESF1	-0.664571	-0.059004	-0.107563	-0.561408	-0.808579	-0.473454	-0.17251	-0.0235915	-0.306819	0.416631
YDR366C	YDR366C	-0.320893	-1.71738	0.134424	-0.574698	0.438145	-0.276149	-0.0939826	0.726087	-0.978071	0.137827
YDR367W	KEI1	-0.307393	-0.711668	-0.0429598	-0.94282	0.478805	-0.414686	-0.261817	0.076068	-0.071141	-0.248535
YDR368W	YPR1	0.294298	-0.340526	0.247146	-0.646676	0.113182	-0.328674	0.117624	-0.252343	0.0695143	-0.597365
YDR369C	XRS2	-0.0758874	-0.255444	0.185462	-0.449996	-0.0854507	-0.754204	-0.13042	0.449041	-0.0818406	-0.317356
YDR370C	YDR370C	-0.510683	-0.322251	0.0356273	-0.177013	0.0264806	-0.225965	-0.275609	0.129632	-0.375001	0.384089
YDR371W	CTS2	0.221033	-0.311389	0.266159	0.694911	0.464954	0.376475	0.00671009	0.518915	-0.186477	0.0856052
YDR372C	VPS74	-0.429031	0.0223807	-0.109859	-0.0683441	-0.0084024	-0.219354	-0.0451042	0.0737266	-0.188205	-0.295212
YDR373W	FRQ1	-0.450663	-0.676832	0.133145	0.17806	0.220385	0.0551093	-0.418096	0.467915	-0.533573	0.107532
YDR374C	YDR374C	-0.255179	-0.460911	-0.00321134	0.465377	0.42979	0.541173	0.257927	0.933959	-0.062372	0.0063161
YDR375C	BCS1	-0.11875	-0.0526289	0.141123	-0.36462	0.323936	-0.072097	-0.348883	0.0258941	-0.145128	0.202383
YDR376W	ARH1	0.0732339	0.00729432	0.254433	0.155126	0.293556	0.132856	0.0276365	0.394191	0.102896	-0.0341324
YDR377W	ATP17	-0.188432	-0.744095	-0.0249329	0.773158	0.585025	1.12684	-0.557581	0.163133	-0.546597	0.496313
YDR378C	LSM6	-0.857126	-1.13643	-0.0472702	0.564364	0.567548	0.130138	-0.755329	0.111992	-1.02267	0.234154
YDR379C-A	YDR379C-A	0.213136	0.242086	-0.0913561	2.9429	2.35179	2.31718	-0.423847	1.30848	-0.0291104	2.24967
YDR379W	RGA2	-0.134925	0.227305	-0.066711	0.645114	-0.253777	0.0248941	0.117477	0.0242315	0.119562	-0.26664
YDR380W	ARO10	1.23639	0.528425	-0.635884	3.49646	1.84099	3.23672	0.808002	-1.15943	1.80391	2.15996
YDR381C-A	YDR381C-A	-1.57762	-0.841059	0.105817	0.7475	0.844473	0.834351	-0.525905	0.53253	-0.94332	0.942399
YDR381W	YRA1	-0.582137	0.143053	0.00353053	0.296699	0.331933	0.16218	-0.331804	0.0483253	-0.629131	0.91299
YDR382W	RPP2B	-1.07589	-1.10399	-0.0995082	0.782938	0.46083	0.43882	-0.937913	0.054789	-0.912872	0.276945
YDR383C	NKP1	-0.604218	-0.168714	-0.138792	-0.0131501	0.537409	-0.0238342	-1.1935	-0.339355	-0.696309	0.349652
YDR384C	ATO3	0.254603	-0.0524203	-0.121069	-0.874243	-0.768293	-0.530697	-0.000641362	-0.389405	-0.168361	-0.163571
YDR385W	EFT2	0.0710243	-0.241963	-0.0524406	0.013908	-0.514025	-0.0837474	0.0893209	-0.187761	-0.0518997	-0.532746
YDR386W	MUS81	-0.536779	-0.0571161	0.010244	-0.331359	0.187032	-0.153754	-0.456322	0.214673	-0.319526	-0.0753387
YDR387C	YDR387C	0.461595	0.596039	-0.117809	0.470552	0.770668	0.318894	0.773182	0.474767	0.436253	0.0959181
YDR388W	RVS167	0.161721	0.0884687	0.0134093	0.282272	-0.0591307	-0.0141547	-0.108057	-0.0810727	0.0960159	-0.460546
YDR389W	SAC7	0.104711	0.306863	-0.314281	0.192053	-0.561223	-0.598085	0.254456	-0.418184	0.256093	-0.981183
YDR390C	UBA2	0.153421	0.103651	0.000793914	-0.511649	-0.516695	-0.338885	-0.0562966	-0.253059	-0.00291206	-0.25598
YDR391C	YDR391C	-0.539903	0.0657873	0.0223447	0.733232	0.878152	1.45055	-0.562901	0.492119	-0.632181	0.911677
YDR392W	SPT3	0.378731	0.186833	0.0409795	-0.316084	0.134664	-0.0851206	-0.430065	-0.288777	-0.0639109	-0.00637659
YDR393W	SHE9	-0.376158	-0.170374	0.149188	-0.512519	0.140473	0.380132	-0.539886	0.077975	-0.400921	0.205652
YDR394W	RPT3	0.013841	-0.0103941	0.0698988	-0.085284	-0.31506	-0.0217935	-0.041251	-0.235181	-0.0904415	-0.168445
YDR395W	SXM1	0.125956	0.151921	-0.150447	-0.538101	-0.978925	-0.555426	0.41188	-0.607199	0.245929	-0.520897
YDR397C	NCB2	-0.558177	-0.788914	-0.0460819	0.508977	0.355044	-0.0872368	-0.615474	-0.267818	-0.685546	-0.0469598
YDR398W	UTP5	-0.0470438	-0.0670745	-0.0557854	-0.332425	-0.836139	-0.320658	0.0281783	-0.354328	-0.0589187	-0.512633
YDR399W	HPT1	-0.320103	-0.542049	0.0440706	0.44484	0.0199954	-0.166825	-0.342789	-0.159521	-0.592358	0.422746
YDR400W	URH1	-0.18652	-0.152477	0.0883636	-0.762473	0.107677	0.158545	-0.314282	0.210618	-0.127499	-0.456194
YDR402C	DIT2	-0.0395285	-0.571613	0.0563775	0.121253	0.337498	0.439522	1.50162	1.35288	-0.10089	0.245367
YDR403W	DIT1	0.621191	-1.95368	0.408434	-1.3667	1.23525	1.14353	-0.221251	-0.120868	-0.0462096	0.384611
YDR404C	RPB7	-0.175961	-0.243482	-0.0758681	0.380141	0.378145	-0.0013088	-0.16033	-0.122648	-0.30382	0.264669
YDR405W	MRP20	0.105141	0.145744	0.224388	0.225182	0.780297	0.908246	-0.474669	-0.4571	-0.304881	0.847332
YDR406W	PDR15	0.122112	-0.277178	-0.309608	-0.834107	1.24257	0.407885	0.285955	-0.0629694	0.180971	-0.67193
YDR407C	TRS120	0.0578686	0.0540142	-0.151708	-0.292856	-0.446355	-0.161881	0.241839	-0.0287796	0.352566	-0.432894
YDR408C	ADE8	-0.382216	-0.893526	0.212258	0.0904955	0.279029	0.039797	-0.286401	0.120356	-0.526357	0.792747
YDR409W	SIZ1	0.197131	0.24069	-0.194832	0.120666	-0.660363	-0.228912	0.259101	-0.376168	-0.0861949	-0.406852
YDR410C	STE14	-0.119995	-0.224725	0.0674173	-0.339396	-0.406243	-0.308153	0.0315432	0.283497	-0.234204	-0.00838963
YDR411C	DFM1	0.225318	0.521068	0.101979	-0.114253	0.0133309	0.245979	0.408982	-0.133172	0.451039	0.365594
YDR412W	RRP17	-0.360688	-0.475876	-0.0385549	-0.410642	-0.357843	-0.197095	-0.331531	-0.511631	-0.490331	-0.140408
YDR414C	ERD1	0.0992995	0.0717229	-0.00352193	-1.50284	-0.590855	-0.681391	0.251639	-0.222456	0.119064	-0.249391
YDR415C	YDR415C	0.125465	0.665753	0.0509823	-0.0968037	0.00741017	0.136283	0.659082	-0.47295	0.489171	-0.250041
YDR416W	SYF1	-0.063725	-0.00269757	-0.0647658	-0.259492	-0.626655	-0.287377	0.110883	-0.298559	0.0620772	-0.443432
YDR418W	RPL12B	-0.598365	-0.871864	-0.0421769	0.633924	0.267442	0.399233	-0.497008	0.0229821	-0.606741	0.205809
YDR419W	RAD30	-0.395074	0.0521476	-0.176859	-0.521494	0.0116027	-0.0365517	-0.0224234	0.103168	-0.128858	-0.311252
YDR420W	HKR1	0.58229	0.311958	-0.33319	0.0325316	-1.50417	-0.180299	0.561773	-0.278751	0.557884	-0.729058
YDR421W	ARO80	-0.136592	0.0844996	0.0401956	0.18493	0.570748	-0.0268799	0.446039	0.454299	0.0802768	-0.0514912
YDR422C	SIP1	0.114304	0.256172	-0.250772	0.144376	-0.133198	-0.226695	0.208452	-0.195876	0.164271	-0.445647
YDR423C	CAD1	-0.0373429	-0.345678	0.170477	0.415135	0.446914	0.294884	-0.480079	0.0383091	-0.315506	0.062267
YDR424C	DYN2	-0.703383	-0.948808	-0.18741	0.304996	0.781113	0.122479	-0.968015	-0.0882531	-1.13372	0.329887
YDR425W	SNX41	0.330462	0.514859	-0.0846521	0.230606	0.0375413	-0.0942644	-0.0665141	0.0176669	0.154949	-0.358002
YDR427W	RPN9	-0.101399	-0.0300376	0.128778	-0.0265428	-0.101033	0.0497638	-0.108886	0.0225497	-0.122066	-0.0213249
YDR428C	BNA7	-1.21969	-0.812876	-0.143489	-0.718744	-0.137566	-0.743943	-0.767127	-0.139469	-0.51555	-0.652599
YDR429C	TIF35	-0.219384	-0.61165	0.0595507	-0.314892	-0.385981	-0.247399	-0.383558	-0.185636	-0.373438	-0.169568
YDR430C	CYM1	0.400746	0.199867	0.0956452	-0.0924108	-0.694915	-0.053264	0.310771	-0.172112	0.360157	-0.209865
YDR432W	NPL3	-0.0612544	-0.357444	-0.104145	0.0640487	-0.292286	-0.0304539	-0.212503	0.139949	-0.404994	-0.342443
YDR434W	GPI17	0.345913	0.385698	-0.141146	-0.68536	-0.0492071	-0.368113	0.523186	-0.409438	0.620161	-0.44923
YDR435C	PPM1	0.0746403	-0.0601655	0.0853746	0.0231072	0.952273	0.533786	-0.332678	0.376123	-0.0893643	0.241148
YDR436W	PPZ2	0.509304	0.562444	-0.0647776	0.476925	0.379483	0.171655	0.291427	0.410139	0.514043	-0.180885
YDR437W	GPI19	0.343231	-0.172337	-0.000549367	1.42829	1.55548	1.24748	-0.292981	0.358121	-1.03727	0.837328
YDR438W	THI74	-0.294673	0.613706	-0.161653	0.355612	0.735996	0.149266	0.412815	0.0701526	0.124821	0.311942
YDR439W	LRS4	-0.349567	-0.242511	-0.166663	-0.151108	0.191874	-0.0357644	-0.0980111	0.0532047	-0.306525	0.255964
YDR440W	DOT1	-0.026465	-0.0834386	-0.0179281	-0.422145	-0.552227	-0.299129	-0.332476	-0.422709	0.0101916	-0.554877
YDR441C	APT2	-0.981614	-0.185088	0.220791	0.888558	0.0196904	0.179097	0.0326335	0.264491	-0.200311	0.332776
YDR443C	SSN2	0.337962	0.171399	-0.0927811	-0.144445	-0.252826	-0.316073	0.516671	0.0549016	0.337414	-0.64053
YDR444W	YDR444W	-0.164078	-0.102461	-0.0887508	-0.109804	0.0164324	-0.29222	-0.239618	-0.323054	-0.0550174	-0.26848
YDR446W	ECM11	-0.29879	-0.640928	-0.247675	0.252503	0.749259	0.155396	-0.232844	0.195923	-0.303939	-0.223989
YDR447C	RPS17B	-0.80359	-1.04841	-0.0584756	0.60055	0.343852	0.568226	-0.720804	-0.0859138	-0.883177	0.213282
YDR448W	ADA2	-0.384737	-0.25164	0.040606	0.41562	-0.0687578	-0.00978616	-0.0393216	0.204666	-0.0739946	0.693197
YDR449C	UTP6	-0.136822	0.135613	0.0628855	-0.211503	-0.641788	-0.26743	0.0972585	-0.345834	-0.0925774	0.0135366
YDR450W	RPS18A	-0.630861	-1.03383	-0.0566436	0.574144	0.138392	0.581216	-0.629897	-0.17463	-0.728101	0.25093
YDR451C	YHP1	-0.349821	0.141248	-0.168937	0.339909	-0.179175	0.0862145	-0.078648	-0.262488	-0.452325	0.638221
YDR452W	PPN1	0.507861	0.599529	-0.0384427	-0.306635	-0.149715	-0.127566	0.319069	-0.0469114	0.474946	-0.295034
YDR453C	TSA2	-0.52094	-2.03868	0.0645373	0.169822	1.45891	0.63778	0.237399	1.02751	-0.558996	-0.423771
YDR454C	GUK1	-0.585254	-0.981848	-0.0258603	-0.11845	0.0338008	-0.208624	-0.504833	-0.0363104	-0.728497	-0.173146
YDR456W	NHX1	0.529942	0.332241	-0.0597807	-0.342415	0.1565	-0.297471	0.673682	-0.315278	0.763207	-0.56844
YDR457W	TOM1	0.184005	-0.126841	-0.219284	0.176677	-0.383249	-0.0536703	0.304206	-0.541241	0.298044	-0.412739
YDR458C	HEH2	0.0135217	0.504078	-0.330039	-0.0472872	-0.22501	-0.20863	0.646145	0.00461654	0.43954	-0.171759
YDR459C	PFA5	-0.498139	-0.0791336	0.106776	-0.142722	0.102747	0.0678784	-0.287307	-0.0374734	-0.354607	0.370104
YDR460W	TFB3	-0.0175276	0.0298955	0.16436	0.1833	-0.0445607	-0.0619822	-0.334254	-0.111595	-0.228887	0.384634
YDR461W	MFA1	-1.3523	-1.50092	-0.382645	0.45069	-1.04999	0.694727	-0.629318	-0.955382	-1.05918	-0.325409
YDR462W	MRPL28	-0.267247	-0.425299	0.129682	0.757861	0.792923	0.778083	-0.782084	0.119229	-0.831073	0.778962
YDR463W	STP1	0.683473	0.666877	-0.0603851	0.376772	-0.00453602	0.150494	0.19726	0.300015	0.347888	0.0538747
YDR464W	SPP41	0.19661	0.218313	-0.160548	-0.297792	-0.844788	-0.633879	0.265299	-0.475216	0.0974567	-0.572216
YDR465C	RMT2	0.0530598	0.218463	0.128211	-0.642205	-0.651441	-0.491511	0.263672	-0.324222	-0.0695259	-0.146648
YDR466W	PKH3	0.297168	0.333107	-0.124971	0.134315	-0.537598	-0.253066	0.117525	-0.204591	0.269863	-0.216366
YDR468C	TLG1	-0.310828	-0.282086	0.0346285	0.30832	0.120077	0.0657109	-0.537794	0.030975	-0.325702	0.067329
YDR469W	SDC1	-0.446614	-0.807069	-0.0101515	-0.375259	-0.0350361	-0.114636	-0.716359	0.0487749	-0.781814	0.470375
YDR470C	UGO1	0.204761	0.19161	0.0654016	-0.117467	0.503428	0.336685	-0.125805	0.0828701	0.0204347	-0.255595
YDR471W	RPL27B	-0.716169	-0.872952	0.0317095	0.526475	0.080967	0.548703	-0.663189	-0.0469629	-0.798643	0.343684
YDR472W	TRS31	-0.354837	-0.453783	-0.181089	-0.78451	-0.134577	-0.217516	-0.164815	-0.272114	-0.252548	-0.278886
YDR473C	PRP3	0.182113	0.281961	0.000169102	-0.0343951	-0.158167	-0.0772776	0.0560313	-0.114217	-0.0126407	0.104966
YDR475C	JIP4	0.454084	0.213291	-0.139162	-0.0621783	-0.0489102	-0.0343778	-0.598717	-0.476382	0.173242	-0.609624
YDR476C	YDR476C	-0.166681	-0.917884	0.394094	-0.102796	1.1374	0.163604	-0.16135	0.846128	-0.362817	0.216017
YDR477W	SNF1	0.610926	0.499225	-0.166121	7.43109e-05	-0.275269	-0.158281	0.247667	-0.464453	0.330012	-0.586268
YDR478W	SNM1	-0.202776	-0.59775	-0.109656	-0.54305	-0.0736832	-0.26084	-0.661225	-0.251831	-0.610089	0.0502019
YDR479C	PEX29	-0.0258052	0.109142	0.169878	0.490043	0.514028	0.192405	-0.0865137	0.10149	0.129259	0.271913
YDR480W	DIG2	-0.34117	-0.0396518	0.235639	0.22989	0.184056	0.0473967	-0.0806555	0.128838	-0.0353272	0.275624
YDR481C	PHO8	1.02502	1.14601	0.462014	-0.350892	-0.140368	0.428795	0.566821	0.0619989	0.745708	-0.224823
YDR482C	CWC21	-0.403763	-0.931706	-0.205792	-0.183807	0.405278	-0.00784407	-0.614496	0.114533	-0.984087	0.0126024
YDR483W	KRE2	0.499313	0.336186	-0.0133267	0.055125	-0.116468	0.319469	0.140509	0.0934334	0.163254	0.0475614
YDR484W	VPS52	0.19006	0.386044	-0.135372	0.0659855	0.0264497	0.112872	0.159164	0.0323373	-0.0132501	-0.385679
YDR485C	VPS72	0.382673	0.468144	-0.165221	0.112659	-0.469115	0.0346232	0.0759769	-0.19753	0.135629	-0.517052
YDR486C	VPS60	-0.123733	-0.351268	0.107684	0.137573	0.318285	0.203139	-0.445444	0.110515	-0.427806	0.280438
YDR487C	RIB3	-0.426326	-0.607534	0.194251	-0.117617	0.244628	-0.134657	-0.565669	0.171696	-0.662554	0.0934918
YDR488C	PAC11	-0.169526	-0.0465172	0.212561	-0.119519	-0.165496	-0.0487728	-0.434984	0.183913	-0.195095	-0.469517
YDR489W	SLD5	0.178109	0.229385	0.0882412	0.0741428	0.147558	0.536387	-0.420167	0.158561	-0.562911	0.489611
YDR490C	PKH1	0.103487	0.650874	0.347109	-0.354557	-0.0313503	-0.285976	-0.039867	0.609285	0.134123	-0.264351
YDR492W	IZH1	0.226327	0.5049	-0.162157	-0.25379	-0.282513	0.15868	0.031071	-0.64328	0.241649	-0.0982113
YDR493W	MZM1	-0.139145	-0.314353	0.284203	0.340725	0.889826	0.656041	-0.675929	0.0234202	-0.82618	0.707149
YDR494W	RSM28	0.143986	0.113713	0.228726	0.109144	0.340045	0.290451	-0.199706	-0.0205388	-0.158048	0.216893
YDR495C	VPS3	-0.20249	0.181475	-0.0114388	0.235778	0.118431	-0.312705	-0.254269	-0.308358	0.269927	-0.490724
YDR496C	PUF6	0.0506176	-0.0615894	0.0479545	-0.284234	-0.741277	-0.296278	-0.21847	-0.656991	-0.0395923	-0.455827
YDR497C	ITR1	0.245833	0.181446	-0.215072	-0.112791	0.379331	-0.367749	0.339258	-0.27628	0.365541	-0.403405
YDR498C	SEC20	-0.0345329	-0.320133	-0.0505115	-0.101692	0.0887965	0.228971	-0.278985	-0.189973	-0.149327	0.137158
YDR499W	LCD1	-0.254204	0.0574151	0.0179706	-0.488325	-0.323779	-0.324381	-0.0667447	-0.0281728	-0.260003	0.178201
YDR500C	RPL37B	-1.26972	-1.15687	-0.121811	0.661904	0.44474	0.578333	-0.892773	-0.0710901	-0.996788	0.385874
YDR501W	PLM2	-0.000177964	0.28047	-0.48648	-0.0934492	-0.658946	0.245761	-0.424227	-0.47319	-0.208485	-0.473138
YDR502C	SAM2	-0.113914	-0.28628	-0.0386469	-0.900754	-0.00316525	-0.41817	0.337979	-0.384542	0.229517	-0.961015
YDR503C	LPP1	0.309547	0.105395	-0.116547	-0.290643	0.214384	0.260914	-0.485245	-0.119651	-0.0470309	0.0168376
YDR504C	SPG3	0.0998288	0.14054	-0.137664	0.799943	0.345386	0.0039985	0.661529	-0.433227	0.756095	0.0961508
YDR505C	PSP1	0.493385	0.923087	-0.273349	-0.164618	-0.650733	-0.111718	0.508352	-0.651994	0.854743	-0.9409
YDR506C	YDR506C	0.836976	0.780959	-0.195453	-0.799869	0.62185	-0.00752125	-0.433513	-1.15278	0.821494	-1.20389
YDR507C	GIN4	-0.114486	0.168688	-0.243373	0.201064	-0.776102	-0.363083	-0.00692437	-0.568469	-0.061736	-0.541732
YDR508C	GNP1	0.6145	0.537301	-0.11266	0.338457	0.084438	0.0954184	0.585781	-0.129048	0.434482	-0.515666
YDR510W	SMT3	-0.427553	-0.902145	-0.00711404	-0.0345857	0.424771	-0.0743374	-0.674616	0.223628	-0.938743	0.0117439
YDR511W	ACN9	-0.258347	-0.705149	0.212954	0.0725704	0.68511	0.616088	-0.628977	0.269649	-0.787014	0.314076
YDR512C	EMI1	-0.906888	-0.478949	0.226787	0.0803189	0.543696	-0.00209328	-0.504896	0.0258282	-0.967238	-0.243249
YDR513W	GRX2	-0.692788	-0.80377	0.0712113	-0.177105	0.686129	0.192661	-0.50905	-0.141876	-0.677716	-0.123728
YDR514C	YDR514C	-0.0505197	-0.963062	0.0809686	-0.127456	-0.362823	-0.394633	0.16164	-0.152169	0.0810119	-0.0760503
YDR515W	SLF1	0.017446	0.321402	0.380654	0.0123337	-0.310309	-0.199392	-0.20478	-0.212672	0.0753105	0.394569
YDR516C	EMI2	1.01181	0.553068	0.343218	0.944404	1.00791	1.37524	-0.717214	0.813798	0.356101	-0.0416189
YDR517W	GRH1	0.0877644	-0.331317	0.0750558	-0.302555	0.127811	-0.024768	-0.423642	0.101432	-0.16439	-0.344666
YDR518W	EUG1	1.07171	0.705311	-0.0620438	-1.92182	0.0706388	-0.538787	0.590339	-0.427046	0.869417	-0.569879
YDR519W	FPR2	-0.545286	-0.764028	0.0574816	-0.0659421	0.624564	0.379129	-0.559224	0.376776	-0.44344	0.178456
YDR520C	URC2	-0.1087	0.288291	-0.138903	-0.0468466	-0.0768135	-0.166963	0.303769	-0.288083	0.217142	-0.530981
YDR522C	SPS2	0.127756	-0.263373	0.0644294	0.3456	0.0229611	0.0698103	0.44408	0.73172	-0.08975	0.0112945
YDR523C	SPS1	0.833959	-0.357614	0.144998	-0.132742	-0.435245	0.0597119	1.64227	0.997996	0.110496	0.194517
YDR524C	AGE1	-0.455859	0.190338	0.0934119	-0.856025	-0.727321	-0.492036	0.326826	0.18628	-0.161309	-0.0703421
YDR524C-B	YDR524C-B	-0.92075	-1.17183	-0.155764	0.86548	0.608437	0.713537	-0.763996	-0.114097	-1.07986	0.331105
YDR525W-A	SNA2	-0.618088	-0.407364	-0.108535	0.780685	0.873667	0.490671	-0.334878	0.439364	-0.522471	0.382155
YDR527W	RBA50	-0.25342	-0.237695	-0.0221092	-0.45326	-0.748908	-0.379201	-0.285347	-0.33516	-0.217751	-0.293715
YDR528W	HLR1	-0.222024	0.17992	-0.448244	-0.0644487	-0.0828082	-0.160341	-0.485428	-0.628778	-0.193092	-0.856796
YDR529C	QCR7	0.08705	-0.709603	-0.193083	0.422314	0.451212	1.18821	-0.68745	-0.151895	-0.486684	0.420117
YDR530C	APA2	-0.106446	-0.588939	0.026513	-0.120317	0.442075	0.40234	-0.485942	0.344041	-0.307847	0.955965
YDR531W	CAB1	-0.299851	-0.223023	0.127449	-0.210548	-0.00549518	-0.261101	-0.106698	-0.0891345	-0.280868	0.0246007
YDR532C	KRE28	-0.413577	0.465149	-0.079699	0.280771	-0.0591909	-0.0709432	-0.328379	-0.200219	-0.291905	0.401908
YDR533C	HSP31	1.2115	-0.551064	0.238695	-0.811505	1.4507	0.223127	1.07114	-0.615165	0.833568	-0.539678
YDR534C	FIT1	-0.736666	-0.866259	0.237217	0.294994	1.79547	0.459643	1.46058	2.16797	-0.265787	-0.0123855
YDR536W	STL1	0.0871493	-0.291016	-0.0191265	1.79017	1.20778	3.10074	-0.169357	0.451849	-0.325113	0.206569
YDR538W	PAD1	-0.100749	-0.520269	-0.0472408	-0.284424	0.38364	0.0365403	-0.324619	-0.34111	-0.0747475	0.0111471
YDR539W	FDC1	0.0639199	-2.73356	0.30732	-0.800524	0.360109	0.522075	-0.367463	-0.139176	0.0132757	-0.134764
YDR540C	IRC4	-0.240608	-1.8509	0.224941	-1.48214	0.501781	0.49245	0.00479552	0.674631	-0.786095	-0.122741
YDR541C	YDR541C	-0.247451	-0.22594	0.602824	-0.0144876	0.883227	0.748664	-0.143502	0.761538	-0.648508	0.889161
YEL076C-A	YEL076C-A	-0.558698	-1.5857	-0.460083	2.20316	1.24321	1.26119	-0.309701	0.52856	-0.889655	-2.2348
YEL076C	YEL076C	-0.706301	-1.18516	0.0460099	2.45193	1.104	0.409341	-0.21536	0.231185	-0.930158	-0.79544
YEL075C	YEL075C	-0.293563	-0.832735	-0.0630791	1.00186	0.781357	0.749575	-0.280341	0.424832	-0.580257	0.512415
YEL073C	YEL073C	0.154058	-1.40381	-0.0583642	0.253182	2.81794	2.30459	-0.151268	1.73542	-1.00178	0.910628
YEL072W	RMD6	0.138422	0.30147	0.310741	-1.08928	0.747272	-0.0241194	0.279639	0.679626	-0.440764	1.01456
YEL071W	DLD3	0.00826153	0.348293	0.238066	-0.445461	0.370223	-0.267513	0.145427	0.550769	0.13689	0.302342
YEL070W	DSF1	-0.342341	-2.16049	0.318404	-0.859289	2.45412	1.54944	0.0497748	1.31683	-0.65751	-0.186711
YEL069C	HXT13	-0.102463	-0.381562	0.0869183	0.618712	0.378232	0.241554	-0.0534511	0.523602	-0.0538435	-0.153742
YEL066W	HPA3	-0.277944	-1.18667	0.225374	0.30442	1.18127	0.481181	-0.40943	0.287597	-0.472237	0.387148
YEL065W	SIT1	1.10325	0.844985	0.473894	0.07032	1.39558	-0.179559	0.751642	0.668844	0.667637	-0.694956
YEL064C	AVT2	-0.151443	0.0850204	-0.230583	-0.160719	0.384991	0.0541197	-0.428661	-0.0690059	-0.0215486	-0.20254
YEL063C	CAN1	0.865016	1.13645	-0.240113	0.487707	0.0248701	0.137582	1.0159	-0.298287	0.864434	-0.541905
YEL062W	NPR2	0.098696	0.236164	-0.161826	0.298239	0.0187424	0.0331863	0.0351063	-0.0463649	0.141738	-0.402005
YEL061C	CIN8	-0.560718	0.365331	-0.486961	-0.4737	-1.05361	-0.793399	-0.449321	-0.607155	-0.120557	-0.474273
YEL060C	PRB1	0.828373	1.01777	-0.0520231	1.64679	1.48173	1.20548	0.765915	1.20003	0.658588	-0.336096
YEL059C-A	SOM1	-0.57958	-1.20132	0.541504	0.0485921	0.30496	1.61071	-0.0792118	1.35088	-0.844592	2.04441
YEL058W	PCM1	0.0708552	0.04463	0.263492	0.172386	-0.43421	0.394456	0.2125	0.44454	0.186918	-0.0958623
YEL057C	YEL057C	0.101298	-2.19376	0.491829	-0.0560089	0.730002	1.3959	0.359661	1.00917	-0.301647	1.52475
YEL056W	HAT2	-0.123735	-0.209002	0.0492627	-0.18123	-0.129014	-0.239191	-0.473887	-0.248449	-0.313094	-0.0776885
YEL055C	POL5	-0.0041548	-0.0714769	-0.0357572	-0.990304	-1.1331	-0.784002	0.329133	-0.739525	0.165435	-0.605393
YEL054C	RPL12A	-0.529765	-0.814164	-0.0821235	0.677575	0.167551	0.500462	-0.632359	0.0595612	-0.647402	0.250682
YEL053C	MAK10	-0.0739085	-0.250124	-0.0737379	0.343711	-0.259279	0.0493476	0.302103	-0.145481	0.171197	-0.188518
YEL052W	AFG1	-0.027684	0.0152533	0.062071	-0.621871	0.0484901	0.0600234	0.0906137	-0.202709	0.0534698	-0.116174
YEL051W	VMA8	-0.351885	-0.531205	0.112277	-0.425249	0.117659	-0.0491912	-0.571569	0.119736	-0.320894	0.0354771
YEL050C	RML2	0.0823212	-0.198975	0.113171	-0.17678	0.0479017	0.166851	-0.125041	0.122435	-0.186677	-0.168002
YEL049W	PAU2	-1.1729	-0.990123	0.290726	1.6276	2.33354	0.340743	0.453257	1.95611	-0.410762	1.70917
YEL048C	TCA17	-0.429429	-0.625341	0.212391	0.356143	0.590266	-0.142536	-0.289949	0.352101	-0.716468	1.05883
YEL047C	YEL047C	-0.100802	-0.157476	-0.0754335	-0.651979	-0.214863	-0.944273	0.11813	0.209502	-0.179756	-0.564876
YEL046C	GLY1	-0.0628448	-0.215131	-0.0941366	0.216192	-0.233545	0.0452782	-0.0951118	-0.285426	-0.104426	-0.50757
YEL044W	IES6	-0.541934	-1.01315	-0.178811	0.548358	0.483368	-0.157534	-0.282412	0.305374	-0.625666	0.0533803
YEL043W	YEL043W	0.702019	0.749439	-0.238879	-0.537408	-0.914567	-0.453907	0.640853	-0.353647	0.533762	-0.469072
YEL042W	GDA1	0.861565	0.43653	-0.264863	-0.565225	-0.25807	-0.282568	0.693538	-0.647703	0.718512	-1.00118
YEL041W	YEF1	0.186583	-0.0655175	0.174528	0.475595	1.1058	1.1297	0.250293	0.579826	0.173422	-0.0684063
YEL040W	UTR2	0.232899	0.102711	-0.0578568	-0.497622	-0.372266	-0.995384	0.228111	-0.277133	-0.0115085	-0.26524
YEL039C	CYC7	2.15064	1.83394	0.809746	0.905397	2.88519	2.91486	0.069105	1.2723	0.25222	2.38167
YEL038W	UTR4	0.10928	-0.349905	0.105774	-0.85277	0.280898	-0.612798	-0.0689247	0.187814	-0.275558	-0.200118
YEL037C	RAD23	0.330676	-0.259053	0.223385	-0.411191	-0.214834	0.0501079	0.0295526	-0.100655	0.00678858	-0.182555
YEL036C	ANP1	0.906787	0.588397	-0.0985553	-0.342125	-0.507052	0.170222	0.556947	-0.455585	0.448678	-0.153451
YEL035C	UTR5	-0.233225	-0.333091	-0.233804	1.62203	0.751268	0.668095	0.124227	0.988516	-0.344659	0.57492
YEL034W	HYP2	-0.567597	-0.773948	-0.114723	0.544773	0.285635	0.320352	-0.476912	-0.09648	-0.482227	0.127724
YEL032W	MCM3	0.131562	0.14904	-0.24037	0.0285678	-0.790609	-0.301498	0.226786	-0.487202	0.298429	-0.841173
YEL031W	SPF1	0.575888	0.592946	-0.072926	-0.0281422	-0.194782	-0.265569	0.825267	-0.373356	0.693563	-0.503688
YEL030W	ECM10	0.00152732	-0.61523	-0.00995945	-1.04609	-0.202331	-0.274617	-0.207656	0.175894	-0.32979	0.456346
YEL029C	BUD16	-0.31159	-0.135088	0.00129341	-0.0409618	0.058919	-0.192912	-0.149321	-0.22426	-0.0443508	0.0750815
YEL027W	VMA3	-0.198668	-0.333545	-0.0166899	0.298956	0.000613301	-0.0116485	-0.10614	0.172286	-0.132636	0.0116876
YEL026W	SNU13	-0.441548	-0.937701	-0.177312	0.378656	0.0406651	0.326039	-0.47104	-0.18997	-0.565407	-0.055294
YEL025C	YEL025C	-0.234756	0.185851	-0.343336	-0.477783	-0.0854824	-0.328101	-0.0745185	0.0874663	-0.0508579	-0.150493
YEL024W	RIP1	1.27241	0.369037	-0.0681687	0.84001	0.401955	1.92571	-0.337244	-0.526494	0.264294	0.499463
YEL023C	YEL023C	-0.494534	-0.229968	0.0760765	-0.970476	0.292155	-0.13393	0.104742	-0.00540809	-0.0752812	0.310707
YEL022W	GEA2	0.0977098	0.0718675	-0.16289	-0.207732	-0.600328	-0.644698	0.257862	-0.389045	0.338529	-0.810812
YEL021W	URA3	-0.262037	-0.465776	-0.102039	0.610184	0.27563	0.368556	0.0797347	0.509881	-0.0974153	0.0772768
YEL020W-A	TIM9	-0.529489	-1.33765	-0.0298231	0.376887	0.484501	0.110084	-0.763092	-0.232304	-0.927381	0.346789
YEL020C	YEL020C	0.217592	0.182464	-0.0827611	-0.0190128	-0.0229412	0.110164	0.0591097	-0.107403	0.141943	-0.141646
YEL019C	MMS21	0.235255	-0.107502	0.0147469	-0.0742035	-0.0717693	0.198871	-0.223754	-0.206583	-0.385942	0.00993623
YEL018W	EAF5	0.0122621	-0.177518	-0.116664	-0.404403	-0.137571	-0.274484	-0.450807	-0.337848	-0.464593	0.115492
YEL017W	GTT3	-0.106833	0.0356538	-0.00486255	-0.0882869	-0.0757477	-0.157417	-0.127082	0.044267	-0.092719	-0.235452
YEL017C-A	PMP2	-0.660717	-0.670155	-0.190999	1.14006	0.506174	0.539755	-0.0297344	-0.0909778	-0.466926	0.421696
YEL016C	NPP2	0.0232759	0.211775	-0.168871	-1.15738	-0.638532	-0.850358	-0.0210811	-0.404948	0.0448976	-0.380092
YEL015W	EDC3	0.412146	0.207309	-0.160164	0.0505141	-0.359582	-0.214663	0.0454921	-0.562704	0.1724	-0.338963
YEL013W	VAC8	0.198227	0.365777	-0.293987	0.281799	0.0127507	0.175831	0.255429	-0.29338	0.300357	-0.662475
YEL012W	UBC8	-0.920079	-0.300076	0.156629	0.471701	0.874036	0.427216	-0.568086	0.45069	-0.379397	0.291098
YEL011W	GLC3	1.59915	1.43682	-0.0643147	1.38818	2.42151	2.65566	-1.15002	-0.116665	0.787484	1.45631
YEL009C	GCN4	-0.0817467	-0.331089	-0.029511	0.504719	-0.0747835	0.389282	-0.125831	-0.150362	-0.241303	0.0445342
YEL007W	YEL007W	0.280355	0.222419	-0.316718	-0.0778364	-0.926731	0.119296	0.206529	-0.879325	0.262445	-0.503144
YEL006W	YEA6	-0.366353	-0.522364	0.23177	-0.0924941	0.32089	-0.327536	-0.166235	0.0924542	-0.310347	0.193338
YEL005C	VAB2	-0.210327	-0.476586	0.0391757	-0.15854	0.781437	0.25647	-0.24006	0.0123247	-0.338762	0.42629
YEL004W	YEA4	0.00365359	0.0461056	-0.0177121	-0.101478	0.273101	0.0392895	0.0413082	-0.382308	0.0955944	0.07205
YEL003W	GIM4	-0.775228	-1.15138	-0.239859	-0.27366	0.499731	-0.262844	-0.781241	-0.396571	-0.865842	0.167285
YEL002C	WBP1	0.591824	0.552362	0.0801009	-0.360001	-0.109168	0.0258167	0.603238	-0.60557	0.538302	-0.471868
YEL001C	IRC22	-0.257825	-0.343736	-0.165876	-0.121544	0.424652	-0.163149	-0.0992188	0.1821	-0.217007	-0.0961993
YER001W	MNN1	1.03596	1.08874	-0.193984	-0.709733	-1.4864	-0.6398	0.70076	-0.594816	0.81794	-0.547638
YER002W	NOP16	-0.508204	-0.412224	-0.068292	-0.245976	-0.44016	-0.360948	-0.266612	-0.385214	-0.425191	-0.112667
YER003C	PMI40	-0.10909	-0.116703	-0.106194	-0.394135	-0.34653	-0.0786691	-0.407808	-0.23405	-0.0649731	-0.495042
YER004W	FMP52	0.00217818	-0.364302	0.239774	-0.137225	0.302	0.016842	-0.390228	0.126105	-0.362644	0.203685
YER005W	YND1	-0.160368	-0.0568357	-0.14223	-0.467745	-0.125114	-0.224045	-0.0675682	-0.373265	0.0141513	-0.454054
YER006W	NUG1	-0.0731638	-0.20674	-0.00436642	-0.364317	-0.667841	-0.501168	0.00402729	-0.516283	0.0295501	-0.442165
YER007C-A	TMA20	-0.549751	-0.668082	0.0409425	-0.105482	0.100573	-0.0535002	-0.485115	0.104568	-0.573827	0.0691444
YER007W	PAC2	-0.369248	-0.374869	0.1068	-1.028	0.04975	-0.468553	-0.170549	0.0798391	-0.252824	-0.345747
YER008C	SEC3	0.44685	0.64756	-0.276054	-0.0566311	-0.443445	-0.357706	0.616098	-0.137734	0.496852	-0.548778
YER009W	NTF2	-0.422043	-0.91426	-0.181419	0.375579	0.299058	0.210916	-0.532537	-0.0453184	-0.562581	-0.0113699
YER010C	YER010C	-0.337478	-0.562146	0.0752965	-0.235027	0.563416	0.588551	-0.755841	0.309714	-0.665736	0.387661
YER011W	TIR1	-1.60725	-2.55767	-0.585676	-1.93422	0.822394	-1.65802	-0.838046	-0.0841468	-1.58766	-1.82265
YER012W	PRE1	-0.195245	-0.466424	0.0315039	0.135986	0.162159	0.260924	-0.359635	0.178266	-0.503084	0.0121607
YER013W	PRP22	-0.0670466	0.187342	-0.239233	-0.0172809	-0.581571	-0.388016	0.174615	-0.10588	0.104258	-0.648459
YER014C-A	BUD25	-0.588739	-0.292862	-0.199393	0.565825	0.669307	0.196354	0.0948919	0.739956	-0.75264	0.104588
YER014W	HEM14	0.542689	0.339553	0.0639191	-0.970161	0.288185	-0.76239	-0.0349463	0.450845	0.051507	-0.736502
YER015W	FAA2	-0.0526637	-0.621066	-0.0199636	-0.124438	1.37951	-0.618929	0.178221	0.883281	-0.0313947	0.185346
YER016W	BIM1	-0.0584561	-0.411635	-0.0865579	-0.390709	-0.385879	-0.322227	-0.707079	-0.465585	-0.64518	-0.0659711
YER017C	AFG3	0.110241	0.517651	0.0165634	-0.127118	-0.275703	-0.309343	0.361633	-0.0426604	0.425813	-0.6556
YER018C	SPC25	-0.0395625	-0.0479001	0.122048	0.709442	1.01917	0.566141	-0.823905	-0.197337	-0.61188	0.753937
YER019C-A	SBH2	-0.783251	-1.23708	-0.140143	0.335559	0.597358	0.0930885	-0.955632	0.146142	-1.2542	0.353192
YER019W	ISC1	-0.426789	-0.18606	-0.0371137	-0.0539609	-0.223005	-0.160233	-0.0346176	0.466709	-0.0908557	-0.198525
YER020W	GPA2	0.269627	0.0559635	0.105224	-0.109522	0.424476	0.182606	-0.287942	0.152931	-0.16079	0.225306
YER021W	RPN3	0.0875282	0.0381648	0.0160823	-0.05972	-0.205833	-0.0560622	-0.124006	0.164929	0.00897856	-0.232018
YER023W	PRO3	-0.26053	-0.659665	-0.0875043	-0.170728	0.182488	-0.221103	-0.339305	0.0584973	-0.1543	-0.215524
YER024W	YAT2	0.221775	0.326275	-0.168211	-0.215692	0.394302	0.0213128	0.281511	0.295713	-0.0195638	0.494501
YER025W	GCD11	0.169872	-0.0116753	-0.192101	-0.0191522	-0.188705	-0.0130973	0.215073	-0.133905	-0.0243811	-0.707197
YER026C	CHO1	0.207332	0.131941	-0.00222908	0.0746523	0.753976	0.0363094	-0.0942386	0.0642834	-0.0141889	0.120728
YER027C	GAL83	-0.040516	-0.307118	0.0474648	-0.416638	-0.0286431	0.0759612	-0.29055	0.10421	-0.226085	-0.272238
YER028C	MIG3	0.48408	-1.39986	0.504469	0.248874	0.600859	-1.12438	0.686159	0.733818	-0.199048	0.270637
YER029C	SMB1	0.155004	-0.377914	-0.190915	-0.0735078	0.225509	0.0772348	-0.500853	-0.44277	-0.593731	0.170028
YER030W	CHZ1	-0.280771	-0.714437	0.0602293	-0.16893	0.238772	-0.0819619	-0.605019	0.0713372	-0.661984	0.251283
YER031C	YPT31	-0.194595	-0.405064	0.0535066	-0.319308	0.0751014	-0.110839	-0.331071	0.0437105	-0.352171	-0.0342492
YER032W	FIR1	0.15004	0.570897	-0.198141	-0.0271882	-0.708958	-0.233207	-0.102501	-0.454599	0.0893462	0.0531438
YER033C	ZRG8	1.67362	1.2114	0.299389	0.569889	0.0151691	0.662185	1.05672	0.71171	1.02562	0.342426
YER034W	YER034W	-0.0137106	-0.453314	0.150371	0.407977	0.542537	0.526659	-0.146918	-0.0456463	-0.245724	0.619491
YER035W	EDC2	-0.690544	-0.568228	-0.274825	0.637376	0.702085	0.228865	-0.609779	0.224718	-0.662405	0.51081
YER036C	ARB1	0.0119736	-0.368213	-0.109168	-0.386532	-0.692543	-0.384473	0.094002	-0.178956	0.00990996	-0.647883
YER037W	PHM8	3.47262	2.80209	1.94892	3.3041	2.11543	2.39658	0.646006	2.44082	1.26304	2.66689
YER038C	KRE29	0.348208	0.323701	0.0411856	0.210706	0.460761	0.273357	-0.127137	-0.0332536	-0.0411527	0.0511013
YER039C	HVG1	-0.284502	0.107687	-0.0715293	0.454129	1.14228	-0.368128	-0.53209	0.132728	0.0824986	0.736718
YER039C-A	YER039C-A	-0.736559	-0.393331	-0.0746511	1.30711	2.32009	-0.0897671	-1.42211	-0.231288	-0.530426	1.98329
YER040W	GLN3	-0.181743	0.30687	-0.155123	0.267455	-0.288089	-0.0574314	0.275004	0.049551	0.171571	0.0740333
YER041W	YEN1	-0.349632	-0.231978	-0.0885133	-0.215887	0.116944	-0.047567	-0.110723	0.433629	-0.282401	0.136591
YER042W	MXR1	-0.951022	-1.02502	0.179385	-0.472034	-0.367775	-0.669389	-0.0402161	-0.209808	-0.372397	-0.900194
YER043C	SAH1	-0.251754	-0.422859	-0.00226004	-0.11897	-0.157725	-0.11434	-0.12784	-0.108634	-0.241338	-0.430268
YER044C	ERG28	-0.189206	-0.745719	0.080453	-1.38068	0.417287	-1.03147	0.240194	1.20836	-0.342806	-0.307494
YER044C-A	MEI4	-0.300399	-1.3626	0.37402	-0.830408	0.497301	0.64408	0.760028	0.935441	-0.557223	1.03775
YER045C	ACA1	0.0016431	-0.0714162	0.32681	1.32985	0.046105	0.15894	0.97993	1.35105	-0.337141	0.778094
YER046W	SPO73	-0.474086	-0.612137	-0.212081	0.083489	0.840001	0.160262	0.095915	1.03914	-0.642221	0.372024
YER047C	SAP1	0.623387	0.348914	-0.149371	0.291982	-0.0615936	0.157875	0.244351	-0.173681	0.245308	-0.18139
YER048C	CAJ1	0.308019	-0.0898368	-0.0658965	-0.59361	-0.472185	-0.28671	-0.109357	-0.290483	-0.0154881	-0.442693
YER048W-A	ISD11	-1.15669	-0.799402	-0.00862704	0.389148	0.806452	-0.0489959	-0.720291	0.430202	-1.05166	0.622131
YER049W	TPA1	0.228319	0.0769306	-0.111253	-0.0908968	-0.531278	-0.735335	0.428337	-0.412289	0.214011	-0.854896
YER050C	RSM18	-0.649851	-0.546037	0.00476529	0.401263	0.703494	0.332756	-0.566966	-0.155774	-0.774897	0.364854
YER051W	JHD1	-0.382172	-0.0263744	0.0130139	-0.356119	0.248714	-0.0930908	0.117136	0.201732	-0.0624787	-0.314107
YER052C	HOM3	-0.203447	-0.26077	-0.0706263	-0.379495	-0.870205	-0.65064	-0.0185661	0.081093	-0.0309389	-0.136714
YER053C	PIC2	0.451527	0.517529	0.356329	1.69535	1.18085	1.71396	0.0275164	0.892152	0.24928	1.18369
YER053C-A	YER053C-A	3.97094	1.14644	0.393294	4.79778	1.81494	3.76001	0.908671	0.44837	1.20025	2.20233
YER054C	GIP2	0.617644	0.804961	0.223208	-0.0561766	1.26537	1.29592	-0.0683072	0.5703	0.407912	0.0182856
YER055C	HIS1	-0.159435	-0.264088	0.115693	0.072314	-0.162917	-0.0139956	-0.0535257	0.225892	-0.198429	0.329748
YER056C	FCY2	0.389286	0.344716	-0.0239253	0.380996	-0.456652	0.0423712	0.55502	-0.224527	0.413305	-0.218542
YER056C-A	RPL34A	-0.859495	-1.28946	-0.13381	0.589855	0.0490939	0.535504	-0.603371	0.0343075	-0.87668	0.342102
YER057C	HMF1	-0.134629	-0.955169	0.118785	0.86353	0.523772	0.605638	-1.00016	-0.0321031	-0.467497	0.484211
YER058W	PET117	-0.596336	-0.883343	0.336926	0.278923	1.4675	0.659211	-1.00085	0.556114	-0.751195	0.660219
YER059W	PCL6	0.191468	0.332732	0.142108	0.0637663	0.0854918	0.0664286	-0.0348923	-0.237437	-0.0934337	0.172744
YER060W	FCY21	0.60875	-0.270687	-0.145723	-0.43903	-0.200799	-0.394774	0.44847	0.258594	0.523651	-2.74639
YER060W-A	FCY22	-0.494832	-0.733373	-1.1171	0.599688	1.2005	1.2078	0.117614	-0.681807	-0.107001	-2.63259
YER061C	CEM1	0.0316103	-0.437943	0.418637	0.0694735	-0.245339	-0.12911	-0.102487	0.383542	-0.206845	0.9656
YER062C	HOR2	1.68464	0.755191	0.491051	1.94227	1.64923	2.14339	0.0435113	1.27849	0.756959	0.370474
YER063W	THO1	-0.368057	-1.23372	0.0353708	0.168471	0.264551	0.14882	-1.03089	-0.0159946	-0.545966	0.143212
YER064C	YER064C	0.270401	0.351354	0.0522755	0.528449	-0.085337	0.841612	0.166987	0.062933	0.0155571	0.131339
YER065C	ICL1	0.188762	-0.405318	-0.194209	-0.159645	0.270883	-0.294829	-0.313598	-0.0115821	-0.00165262	-0.292825
YER066W	RRT13	-0.409972	-0.14804	0.151817	0.174274	1.05056	0.357516	0.206343	0.606977	-0.306489	1.17894
YER067W	RGI1	1.67403	1.31317	0.348548	1.99543	1.85765	2.79336	-1.0221	0.725355	-0.0657876	2.04495
YER068W	MOT2	0.353733	0.310496	-0.0177929	-6.8526	-0.236243	0.079681	0.154242	-0.235766	0.231253	-0.0440325
YER069W	ARG5,6	-0.930213	-0.113712	0.35121	-0.128837	-0.371975	-0.882666	0.729617	0.306525	0.00312109	0.915823
YER070W	RNR1	0.080133	0.115879	-0.221848	-0.00215089	-0.652449	-0.198278	0.0501533	-0.587985	0.23415	-0.570099
YER071C	YER071C	-0.545562	-1.00124	0.245152	0.872074	0.675368	0.965276	-0.178308	0.673683	-0.76947	0.622132
YER072W	VTC1	-0.0602709	-0.513896	0.235606	0.603441	0.387239	0.699416	-0.141646	0.20733	-0.278181	0.470567
YER073W	ALD5	-0.377021	-0.240027	-0.0404106	-0.294648	-1.47118	-0.397642	-0.32415	0.0510501	-0.244984	0.0764494
YER074W	RPS24A	-0.812186	-1.01559	-0.055957	0.688996	0.343835	0.488919	-0.544441	0.0608519	-0.633652	0.309022
YER074W-A	YOS1	-0.769071	-1.1103	-0.0888937	0.266729	0.629111	-0.108824	-0.712806	-0.0682382	-0.78289	0.254708
YER075C	PTP3	-0.00467304	0.458849	-0.198706	0.215707	-0.927465	0.0514438	0.546634	0.121637	0.0988932	-0.517977
YER076C	YER076C	-0.201585	-0.0756782	0.134548	-0.247004	0.77249	0.178869	-0.158393	0.339017	-0.238687	0.726642
YER077C	YER077C	0.0782916	0.00307404	0.261041	-0.270386	-0.291946	-0.0713394	0.334962	0.20793	0.109865	0.180595
YER078C	ICP55	-0.375446	0.355652	0.0249908	-0.559143	0.0937676	-0.113255	-0.00117426	-0.0182357	-0.114984	-0.385001
YER078W-A	YER078W-A	-0.799524	-1.69415	-0.070061	0.249815	0.67386	0.125675	1.51825	2.51048	-0.687021	1.55237
YER079W	YER079W	0.20015	0.45544	0.133942	1.659	1.20138	1.57715	-1.04977	0.0230517	-0.141261	0.384435
YER080W	AIM9	0.411711	0.199987	-0.0396432	-0.0502321	-0.235347	-0.0201654	0.243203	-0.0903748	0.308566	-0.893926
YER081W	SER3	-1.53552	-1.01078	-0.0735726	0.760865	0.516356	-0.829352	0.619384	1.54262	-0.314272	0.982979
YER082C	UTP7	0.0193744	-0.0750503	-0.0671309	-0.529433	-0.957221	-0.418982	-0.0765492	-0.478198	-0.197981	-0.573372
YER083C	GET2	-0.00377282	-0.0918253	0.0624022	-0.114567	0.301161	0.137758	-0.117786	-0.0478882	-0.0881588	-0.0959189
YER085C	YER085C	-0.310294	-0.909467	-0.134769	1.15553	0.654897	0.462185	-0.0803106	0.321652	-0.409782	0.401701
YER086W	ILV1	0.271864	0.169466	-0.122864	0.0744307	-0.0663977	-0.248653	0.37033	0.307334	0.17518	-0.460779
YER087C-B	SBH1	-0.660324	-1.07511	-0.296813	0.0438396	0.311442	-0.0523331	-0.648399	-0.426927	-0.732371	0.0645913
YER087W	AIM10	0.389427	0.0677503	0.0146385	-0.496105	0.0853102	-0.0641288	0.0873857	-0.0773026	0.327192	-0.487769
YER088C	DOT6	0.541674	0.191183	-0.355682	-0.358929	-1.13338	0.274094	-0.166912	-0.786397	0.327449	-0.11787
YER089C	PTC2	-0.0643034	-0.170348	0.0678611	0.220172	-0.247818	0.183807	-0.18568	-0.0112133	-0.161756	-0.369652
YER090W	TRP2	0.0517777	0.112397	0.136926	-0.437786	-0.302981	-0.426461	0.375602	-0.047661	0.190727	-0.290488
YER091C	MET6	-0.218512	-0.343698	-0.315715	-0.217157	-1.74926	-0.616195	0.806447	-0.206759	0.709826	-1.33773
YER092W	IES5	-0.43373	-0.258748	0.258306	0.5346	0.909269	0.332005	-0.432488	0.526819	-0.851824	1.11487
YER093C	TSC11	-0.0174012	-0.00147719	0.0159952	-0.400275	-0.504772	-0.517013	0.120642	-0.217756	0.144422	-0.338612
YER093C-A	AIM11	-0.431002	-0.593626	0.156769	-0.377289	0.963316	0.534989	-0.540047	0.0983438	-0.649001	0.325447
YER094C	PUP3	-0.0310369	-0.318892	0.140941	0.236335	0.348212	0.320612	-0.251444	0.226379	-0.333462	0.0655806
YER095W	RAD51	0.148282	0.296084	0.0971994	-0.223073	-0.325509	0.297854	-0.614221	0.0337762	-0.0286519	-0.107557
YER096W	SHC1	1.1812	1.14049	0.466107	0.359502	-0.00139915	0.519384	0.430658	-0.334591	0.443075	0.575689
YER098W	UBP9	0.685601	0.70449	0.0858903	0.42208	0.491202	0.568883	0.570138	0.37664	0.478298	0.367032
YER099C	PRS2	-0.104524	-0.0714483	0.0523742	-0.393843	-0.108625	-0.220259	0.0600605	0.085981	-0.140307	0.108817
YER100W	UBC6	-0.181991	-0.157385	0.0817883	-0.315205	-0.071733	-0.150572	-0.211444	-0.0602304	-0.200283	-0.0192149
YER101C	AST2	0.0718192	0.0621178	0.128283	-0.344789	0.313558	0.244153	-0.145829	0.237612	0.0502168	0.225738
YER102W	RPS8B	-0.695582	-0.754122	0.0345467	0.347293	-0.0253667	0.335099	-0.68651	0.0244275	-0.772242	0.215716
YER103W	SSA4	-1.08073	-1.22529	-0.45867	-1.24859	0.144505	-0.152032	0.360513	-0.690704	0.256112	-0.461908
YER104W	RTT105	0.0615964	-0.0844868	0.0532132	0.0480157	0.895648	0.228119	-0.658266	-0.265743	-0.630487	0.808556
YER105C	NUP157	0.221448	0.284497	-0.229767	-0.149859	-0.527475	-0.247257	0.501564	-0.549224	0.411708	-0.680425
YER106W	MAM1	-0.507306	-1.1397	-0.0752333	-0.674998	1.19808	0.336026	0.277682	0.269499	-0.472035	0.28921
YER107C	GLE2	0.174288	0.0678877	0.00139873	-0.0464021	-0.00735032	0.187506	-0.253262	-0.0681319	-0.415437	0.207539
YER109C	FLO8	0.00900287	0.583106	-0.158523	-0.116248	-0.174074	-0.287359	0.200074	-0.286777	0.398913	0.133611
YER110C	KAP123	0.0586834	0.154826	-0.0626872	-0.295592	-0.83947	-0.811172	0.445426	-0.713116	0.311243	-0.519137
YER111C	SWI4	0.470211	0.885199	-0.486291	0.764746	-0.710955	0.150313	0.15672	0.0527161	0.359027	-0.568569
YER112W	LSM4	-0.395632	-0.546482	-0.191814	0.287294	0.135095	-0.0444734	-0.435251	-0.0205808	-0.555517	0.259077
YER113C	TMN3	0.00689007	0.535709	-0.182589	-0.339369	-0.227791	-0.326221	0.605057	-0.0601762	0.459424	-0.742385
YER114C	BOI2	0.460602	0.206181	-0.20475	-0.382608	-0.734717	-0.418674	0.159875	-0.639276	0.288611	-0.784161
YER115C	SPR6	-0.26868	-1.37736	0.152451	-1.29775	-0.0124947	-0.416794	-0.410603	-0.151354	-0.485458	0.402448
YER116C	SLX8	0.134746	-0.408365	0.211761	0.323125	0.791706	0.562424	-0.181451	0.220003	-0.286491	0.617188
YER117W	RPL23B	-1.15775	-1.05185	-0.0274327	0.458252	0.157193	0.404836	-0.568464	-0.10722	-0.863593	0.123313
YER118C	SHO1	0.462326	0.318103	-0.0487625	-0.623504	-0.879089	-0.184652	0.135989	-0.402001	0.196108	-0.413387
YER119C	AVT6	0.218569	0.529967	0.201458	-0.00268497	0.490812	-0.0153204	-0.0220646	0.533459	0.255955	-0.484843
YER120W	SCS2	-0.361536	-0.596998	0.0836269	0.023194	0.0255034	-0.110762	-0.566346	-0.0289395	-0.386533	-0.13355
YER122C	GLO3	-0.132275	-0.0905819	-0.0135952	-0.155529	-0.386536	-0.216944	-0.146159	-0.142808	-0.0618004	-0.348128
YER123W	YCK3	-0.0144897	0.509253	-0.131088	0.297699	-0.186576	0.0808369	0.28236	0.00549271	0.0760364	-0.322604
YER124C	DSE1	0.464401	0.415969	-0.210781	1.52911	-0.437955	0.739922	-0.0250611	-0.505218	0.298476	-0.489711
YER125W	RSP5	0.142635	0.264491	-0.212733	0.122036	-0.52955	-0.139802	0.269	-0.816664	0.484221	-0.392629
YER126C	NSA2	-0.0898738	-0.38464	0.115868	-0.0637638	-0.294446	-0.0781029	-0.243582	-0.239331	-0.317798	0.0925045
YER127W	LCP5	0.00903802	-0.103565	0.0642537	-0.295531	-0.771849	-0.186261	-0.129264	-0.503633	-0.233462	-0.0384339
YER128W	YER128W	-0.641943	-0.163744	0.229773	0.0760999	0.320803	-0.138459	-0.330283	0.498578	-0.401648	0.339125
YER129W	SAK1	0.3272	0.268248	-0.12509	-0.104337	-0.334815	-0.113947	0.346945	-0.169471	0.273072	-0.50626
YER130C	YER130C	0.0185447	-0.184182	0.248196	0.720322	0.36995	0.484534	0.145323	0.648983	-0.0492645	0.609393
YER131W	RPS26B	-1.05909	-1.11947	-0.149518	0.457845	0.212323	0.571325	-0.744482	-0.128764	-0.893153	0.247234
YER132C	PMD1	-0.576482	-0.609395	-0.0449053	-0.27348	-0.973784	-0.404527	0.249836	-0.042857	0.103673	-0.447813
YER133W	GLC7	0.0474114	-0.303211	-0.102256	0.209839	-0.0149374	-0.0442963	0.015205	-0.0741011	-0.0198262	-0.187718
YER134C	YER134C	-0.398435	-0.576955	0.0405992	0.353108	0.569752	0.331456	-0.76015	0.102734	-0.617479	0.308309
YER136W	GDI1	0.0138947	0.127114	-0.00410182	0.191377	-0.00840622	0.0692711	0.160187	0.233762	0.115333	-0.551213
YER137C	YER137C	-0.415998	-0.89143	-0.119328	-0.116708	0.274804	-0.0125424	-0.0995327	0.31294	-0.671885	0.710206
YER138W-A	YER138W-A	-1.54882	-0.816742	0.158787	1.2632	0.663481	0.980767	-0.4161	-0.0117735	-1.14612	0.927237
YER139C	RTR1	0.0782695	-0.0924673	0.0192235	0.51023	0.65748	0.514836	-0.693418	0.193022	-0.372375	0.655259
YER140W	YER140W	0.152829	0.24707	-0.0845215	-0.00261649	0.0582776	0.138857	0.231541	-0.0885835	0.0128302	-0.420261
YER141W	COX15	0.259713	0.325177	0.16484	0.224632	0.509033	0.492981	0.263003	0.110572	0.411973	-0.424007
YER142C	MAG1	-0.0125103	-0.0818964	0.559598	-0.618078	0.603476	-0.0285367	0.478556	0.975731	0.176464	0.203434
YER143W	DDI1	-0.0167619	0.293049	0.247632	0.113227	0.0370252	0.190117	0.233148	0.26539	-0.0908874	0.259826
YER144C	UBP5	-0.475046	0.153661	0.12322	0.223558	-0.24042	0.38589	0.0826114	0.50366	0.117521	-0.233076
YER145C	FTR1	0.505891	0.203571	0.0277366	-0.154344	0.49169	-0.299706	-0.0340081	-0.110721	0.132349	-0.81254
YER146W	LSM5	-0.952163	-1.2237	-0.0973764	-0.300438	0.608051	0.0240884	-1.11178	-0.413829	-1.05204	-0.257858
YER147C	SCC4	0.0375556	-0.103037	0.0160064	-0.623373	0.0501636	-0.172202	-0.353948	-0.140064	-0.182235	-0.167862
YER148W	SPT15	-0.362345	-0.492242	-0.0431964	-0.101058	-0.036434	-0.133839	-0.237404	0.0241415	-0.375395	-0.124331
YER149C	PEA2	0.00821756	-0.09616	0.0844266	-0.833244	-0.430575	-0.350188	0.017279	-0.031026	-0.0391642	-0.270647
YER150W	SPI1	0.24446	0.0940262	-0.215943	1.03076	0.423052	0.400835	0.596642	1.16948	-0.667572	1.02475
YER151C	UBP3	0.204508	0.252724	-0.0986462	-0.285375	-0.662759	-0.497915	0.277858	-0.671578	0.334893	-0.595888
YER152C	YER152C	-0.308829	-0.137733	-0.062886	0.276456	-0.363389	0.370645	-0.622859	0.220911	-0.234115	-0.533394
YER153C	PET122	0.741635	-0.235556	-0.955808	1.75005	1.63129	1.70962	-1.16586	-0.140968	-0.779332	-1.04982
YER154W	OXA1	0.0875667	-0.344509	0.0308323	0.246621	-0.240056	-0.0530706	-0.406365	-0.0734931	-0.143048	-0.265112
YER155C	BEM2	0.281518	-0.224189	-0.269011	0.0210563	-0.823385	-0.517033	0.245923	-0.27823	0.394705	-0.417258
YER156C	YER156C	0.219047	-0.458859	-0.0970144	-0.494096	-0.390225	-0.252767	-0.340943	-0.682706	-0.245519	-0.398058
YER157W	COG3	0.105526	-0.175255	-0.14852	-0.52312	-0.675458	-0.501163	0.292337	-0.142916	0.208476	-0.430678
YER158C	YER158C	1.04739	0.669774	0.212421	0.524538	0.315229	1.0935	0.757691	0.761542	0.629282	0.594916
YER159C	BUR6	-0.891186	-0.64533	-0.137064	0.379385	0.542751	-0.295317	-0.721506	0.0939664	-0.97063	0.523051
YER161C	SPT2	-0.212144	0.00631286	0.0408189	0.15082	0.152818	0.0951727	-0.315968	-0.141293	-0.228222	0.466537
YER162C	RAD4	0.307748	0.711485	-0.134317	-0.0628863	-0.135314	0.118103	-0.234958	-0.589444	0.233843	-0.0485018
YER163C	YER163C	-0.0273927	-0.892427	0.360701	0.173155	0.649262	0.149356	-0.175038	1.17181	-0.469469	0.526872
YER164W	CHD1	0.54203	-0.255866	0.0664439	0.278406	-0.456738	-0.387004	0.185842	-0.77992	0.231935	-0.587313
YER165W	PAB1	0.272446	-0.093555	-0.124046	0.212897	-0.410437	0.270006	0.168952	-0.387248	0.181334	-0.755073
YER166W	DNF1	0.704618	0.564165	-0.179743	-0.439205	-0.491856	-0.467887	0.489738	-0.606125	0.779392	-0.765134
YER167W	BCK2	-0.244981	-0.278001	0.00725069	0.308821	-0.683442	-0.102166	-0.203663	0.125246	-0.120729	0.121385
YER168C	CCA1	-0.0615561	0.105789	0.106285	-0.243296	-0.0772537	-0.125627	0.0805001	0.0634275	-0.0310303	-0.295652
YER169W	RPH1	-0.040163	0.0977436	-0.124486	-0.322924	-1.05202	-0.554571	0.366445	-0.161798	0.106402	-0.646546
YER170W	ADK2	-0.147808	-0.244324	0.178366	0.44985	0.798521	0.542583	-1.03577	-0.222315	-0.402213	0.500456
YER171W	RAD3	-0.169643	0.217842	-0.0165827	-0.13496	-0.310939	-0.300535	0.412599	-0.00433968	0.0825333	-0.232505
YER172C	BRR2	0.124468	0.102351	-0.311949	-0.180576	-0.612839	-0.233835	0.546519	-0.386898	0.366968	-0.593163
YER173W	RAD24	-0.497694	0.180246	-0.13327	-0.325662	0.216061	-0.396679	0.133641	0.241454	-0.183504	0.129872
YER174C	GRX4	-0.318979	-0.536295	-0.319318	-0.619267	-0.107319	-0.00318847	-1.12428	-1.92115	-0.320366	0.0620712
YER175C	TMT1	-0.095907	0.0644139	0.355274	0.315959	1.37638	0.539312	-0.142035	1.10689	0.0714004	0.442535
YER175W-A	YER175W-A	-0.83548	-0.856825	-0.358962	0.780783	0.930958	0.500576	-0.347499	0.263702	-0.90411	0.891658
YER176W	ECM32	0.272713	0.284219	-0.0500899	-0.147574	-0.590605	-0.470946	0.205143	-0.378608	0.198687	-0.353972
YER177W	BMH1	-0.384851	-0.582975	-0.0498726	0.192756	0.165951	0.446008	-0.54589	-0.0561193	-0.356128	-0.104555
YER178W	PDA1	0.0112809	-0.13148	0.079616	0.189806	-0.000323693	0.0638472	-0.0727723	0.143879	-0.0863518	-0.199587
YER179W	DMC1	0.0488479	-0.868784	-0.0937747	0.377505	0.962328	0.346463	-0.253531	0.247164	-0.194662	0.0978527
YER180C	ISC10	0.12572	0.0209856	0.0348477	0.236497	0.499986	0.0514317	0.0961851	0.0468384	-0.0813538	0.954759
YER180C-A	SLO1	0.000618776	-0.599171	0.0373632	0.839491	1.22437	0.771537	-0.831199	-0.0658209	-1.27922	1.29334
YER182W	FMP10	-0.24766	-0.106489	0.123024	0.0164884	0.535143	0.220921	-0.265591	0.118502	-0.129367	0.064399
YER183C	FAU1	-0.477698	-0.595873	0.0749222	-0.246092	0.501658	-0.135522	-0.41555	0.17559	-0.482567	0.000740056
YER184C	YER184C	0.0932425	0.0681572	0.0482548	0.293603	0.626243	0.518861	0.115988	0.471041	0.0607298	0.201777
YER185W	PUG1	-0.0707311	-0.0471741	0.372121	0.585954	0.930486	0.103189	0.777481	1.15504	-0.622634	0.812379
YER186C	YER186C	-0.205292	-0.667947	0.100911	-0.550163	0.193433	-0.0168234	-0.635361	-0.0753783	-0.583195	0.0835189
YER187W	YER187W	-1.68688	-3.13139	-0.00299528	-1.54044	1.20691	0.542984	-0.255516	-0.470284	-1.85667	-0.0457807
YER188C-A	YER188C-A	-2.37089	-3.7448	-0.125656	0.667017	1.12461	1.29377	0.741354	0.104966	-1.17739	2.15033
YFL068W	YFL068W	-0.457302	-0.920081	0.47452	1.24127	1.82099	1.24491	0.132051	1.02187	-0.912785	0.206031
YFL067W	YFL067W	-0.541373	-0.897581	-0.0157267	1.13062	1.30108	1.19371	-0.0590312	0.761407	-0.683404	0.486103
YFL065C	YFL065C	-0.501522	-0.853086	-0.0614599	1.94128	1.112	1.01493	-1.56397	-0.124884	-1.70011	0.170813
YFL064C	YFL064C	-0.257299	-0.809703	-0.322822	1.92327	0.614296	0.711012	-1.19384	-0.343168	-1.42547	-0.121102
YFL062W	COS4	0.298303	0.0998455	0.00560629	0.641278	0.346412	0.15113	0.722994	0.804079	0.152384	-0.086438
YFL061W	DDI2	-0.125055	-0.441652	0.601636	1.46534	1.83917	1.33937	0.0487729	0.193659	-0.452816	1.93418
YFL060C	SNO3	-0.307527	-3.04993	0.357235	0.153052	0.828414	1.02975	-0.808267	0.0977038	-0.564981	0.213809
YFL059W	SNZ3	-0.412298	-3.98229	0.410073	-1.2583	1.25984	0.779029	-0.14041	0.843592	-0.553864	-0.482155
YFL056C	AAD6	-0.755294	-0.768965	0.636527	0.00481727	1.99023	0.206691	1.05273	0.0960954	0.0693779	0.684053
YFL055W	AGP3	-0.0784061	-0.465932	0.266766	-0.639205	0.821257	0.998699	0.810002	0.953553	0.136452	0.11213
YFL054C	YFL054C	0.677049	0.561767	-0.0273062	0.596916	0.104226	1.45556	0.433535	1.04367	0.14746	0.494574
YFL053W	DAK2	0.453786	-0.496807	0.162336	0.43572	-0.248951	-0.587736	0.167305	0.447805	-0.182515	-0.283821
YFL052W	YFL052W	0.961522	0.381693	0.0531934	1.32079	1.62292	2.53323	0.079691	0.668933	0.119988	-0.130457
YFL051C	YFL051C	-0.392399	-0.85672	0.555997	0.905482	0.618101	0.00545462	0.842219	0.652038	-0.455072	0.673094
YFL050C	ALR2	-0.257846	0.206107	0.00519254	0.135756	0.048189	-0.0142517	0.254595	0.117173	-0.0904306	0.684814
YFL049W	SWP82	-0.0151566	0.45265	-0.0780043	0.0413227	-0.118872	0.0111615	-0.173739	-0.0829166	-0.0757816	-0.157203
YFL048C	EMP47	0.355547	0.696594	-0.210715	-0.439626	-0.188163	-0.332076	0.739717	-0.0650901	0.45063	-0.0487364
YFL047W	RGD2	-0.074895	0.081101	-0.196561	-0.0806355	-0.218509	-0.00680116	0.297673	-0.279567	0.221727	-0.85687
YFL046W	FMP32	-0.297901	-0.359051	0.0263249	-0.277061	0.3565	-0.108653	-0.4656	0.0259629	-0.51175	-0.0283386
YFL045C	SEC53	-0.10143	-0.305798	-0.0481392	0.0211365	-0.173163	0.0828201	-0.360733	-0.0922781	-0.316688	-0.122682
YFL044C	OTU1	0.27824	-0.331811	0.381411	-0.0472107	0.529397	0.507266	-0.568643	0.0108995	-0.187208	0.202079
YFL042C	YFL042C	0.0994132	0.124976	0.142291	-0.10029	0.262582	0.161462	-0.180054	0.188296	0.0436623	-0.211571
YFL041W-A	YFL041W-A	-1.50454	-0.705152	0.0361126	0.512986	1.66258	0.561851	-0.814543	0.403056	-0.906243	1.47083
YFL041W	FET5	0.333697	0.659262	-0.111246	-1.00499	0.523177	-0.445205	0.807233	0.120865	0.625814	-0.730366
YFL040W	YFL040W	-0.126101	-0.42402	-0.0426755	0.515909	0.479137	0.238804	-0.0925239	0.413642	-0.0321484	-0.225389
YFL039C	ACT1	-0.0434503	-0.457513	-0.0144185	0.112656	-0.226473	0.0895902	-0.0969947	-0.257782	-0.200483	-0.256062
YFL038C	YPT1	-0.263674	-0.515639	-0.0454166	0.165443	0.231129	0.179288	-0.533618	0.0480187	-0.46854	-0.0766368
YFL037W	TUB2	-0.12901	-0.249798	-0.00858669	-0.3158	-0.0631695	-0.00417398	0.00443211	-0.109575	-0.115628	-0.505265
YFL036W	RPO41	0.664417	0.370337	-0.190132	0.383262	-0.363485	-0.139844	0.289285	-0.377507	0.444994	-0.435052
YFL034W	YFL034W	-0.182196	-0.0519214	-0.0596995	-0.302561	-0.436524	-0.263883	-0.188121	-0.0450445	-0.0406715	-0.605931
YFL034C-B	MOB2	-0.0326584	-0.181479	-0.0317683	-0.229986	-0.0254273	-0.156819	-0.479495	-0.151041	-0.324278	0.127398
YFL034C-A	RPL22B	-0.827265	-1.22652	-0.103208	0.660714	0.556921	0.685413	-0.809958	-0.202504	-0.862346	0.944738
YFL033C	RIM15	-0.303559	-0.0418348	-0.0363524	-0.541534	-0.445876	-0.31069	0.0408888	-0.320339	0.190296	-0.85333
YFL031W	HAC1	-0.628289	-1.08049	0.150172	0.515057	1.12826	0.90304	-1.57742	0.400911	-1.53001	-0.121215
YFL030W	AGX1	-0.282889	-0.559487	0.231657	0.254992	1.09655	0.360191	-0.53438	0.736003	-0.288295	0.068365
YFL029C	CAK1	-0.0297659	-0.495507	0.16499	-0.818258	0.161647	-0.210325	-0.230268	0.411753	-0.222226	-0.180408
YFL028C	CAF16	-0.416798	-0.53876	0.0848288	-1.13539	0.047104	-0.57927	-0.323186	0.347873	-0.472995	0.186239
YFL027C	GYP8	0.125036	-0.200901	-0.0960045	-0.418115	-0.24977	-0.0140957	-0.0935279	0.0291437	-0.349868	0.116847
YFL026W	STE2	-0.211728	-0.224303	-0.168217	-0.363204	-1.09179	-0.471305	0.0722052	-0.665023	-0.175394	-0.287183
YFL025C	BST1	0.616042	0.599054	-0.219052	-0.66323	-0.448221	-0.653946	0.905692	-0.253454	0.642582	-0.708511
YFL024C	EPL1	0.0620513	-0.0365762	-0.115334	1.50083	0.330855	0.712251	0.11356	-0.0411453	0.0271387	0.0561496
YFL023W	BUD27	-0.13449	0.0466916	-0.0379179	-0.714195	-1.1754	-0.989623	0.232844	-0.734793	0.0721321	-0.471404
YFL022C	FRS2	0.0779422	-0.174789	-0.0111688	-0.0148344	-0.530095	0.0916378	0.067043	0.0598041	-0.0807514	-0.459654
YFL021W	GAT1	0.440035	1.71351	0.556064	0.650215	-0.932878	-0.596691	0.145885	-0.0386252	0.598357	0.353415
YFL020C	PAU5	-0.63733	-0.664645	-0.115816	0.870667	1.97291	0.920152	0.0813569	0.902438	-0.602781	1.58649
YFL018C	LPD1	-0.0858154	-0.250854	0.0972049	0.096838	0.0692899	0.39397	-0.104231	-0.14873	0.0400163	-0.132915
YFL017W-A	SMX2	-0.57649	-1.11476	-0.153869	-0.142316	0.730821	0.409534	-0.906621	0.110329	-1.00649	0.243005
YFL017C	GNA1	-0.610564	-0.93251	-0.0275557	-0.73935	-0.0782006	-0.466975	-0.781204	-0.209231	-0.657206	0.190463
YFL016C	MDJ1	-0.16787	-0.635967	-0.115763	-0.852584	-0.756325	-0.729838	-0.363312	-0.433946	-0.103233	-0.272023
YFL014W	HSP12	2.35944	3.82647	-0.738679	7.82771	2.57845	6.63603	-0.43098	2.33934	0.479588	4.48806
YFL013C	IES1	0.131671	0.0580219	0.0250211	0.0269883	-0.490916	-0.0615512	-0.100378	-0.506153	0.0428052	-0.183474
YFL012W	YFL012W	-0.866593	-1.52393	-0.0374992	0.128405	0.710276	0.0407391	-0.319006	0.462362	-0.701832	0.0070292
YFL011W	HXT10	-0.19204	-0.185373	0.0693024	0.749059	0.217109	0.376491	0.368546	0.770094	-0.172723	-0.0174174
YFL010W-A	AUA1	-0.67631	-0.842907	0.345561	1.38443	1.33215	0.589868	0.107859	2.14838	-1.08951	0.534334
YFL010C	WWM1	0.202264	-0.144635	0.22464	0.26452	0.356111	0.0217652	-0.388203	0.225444	-0.368099	0.361646
YFL009W	CDC4	-0.117357	0.119305	-0.0228414	0.0197843	-0.338411	-0.393509	0.267795	-0.282632	0.415672	-0.443807
YFL008W	SMC1	0.101234	0.202125	-0.149145	-0.168777	-0.928942	-0.343202	-0.186647	-0.744375	0.173128	-0.586424
YFL007W	BLM10	0.102245	-0.122366	0.0263492	-0.874208	-0.600087	-0.714082	0.415153	-0.455765	0.279595	-0.552853
YFL005W	SEC4	-0.39337	-0.72497	0.0325156	-0.155423	0.316115	0.0217233	-0.800767	-0.140518	-0.646175	0.0327591
YFL004W	VTC2	0.39626	0.372549	0.23586	-0.124056	-0.420413	-0.305633	0.319131	-0.219939	0.280483	-0.35758
YFL003C	MSH4	-0.132502	-1.50335	-0.116878	-0.481811	-0.00989295	-0.516508	-0.0791359	0.00603862	-0.245089	-0.976311
YFL002C	SPB4	0.107249	0.184182	-0.0877654	-0.0824228	-0.125899	-0.216782	0.223374	-0.143585	0.196771	-0.657381
YFL001W	DEG1	0.241295	0.0468489	-0.023695	-0.218624	-0.0446988	-0.101599	-0.087218	-0.282625	-0.122288	-0.200053
YFR001W	LOC1	-0.360395	-0.750234	-0.0233456	-0.504906	-0.399551	-0.391006	-0.40465	-0.252589	-0.544246	-0.147778
YFR002W	NIC96	0.409782	0.293756	-0.13426	0.00186326	-0.41384	-0.444172	0.332534	-0.430121	0.108848	-0.581174
YFR003C	YPI1	-0.264262	-0.562373	0.246119	0.673542	0.635914	0.286244	-0.421888	0.52848	-0.478856	0.540652
YFR004W	RPN11	0.0265837	-0.13821	0.164491	-0.111158	-0.0964081	-0.042497	-0.155549	-0.0835627	-0.205487	-0.0984752
YFR005C	SAD1	0.257684	-0.122592	0.103543	-0.100768	-0.0353027	0.122444	-0.0175002	-0.0547828	0.0124719	0.289486
YFR006W	YFR006W	0.251967	0.068054	0.0322398	-0.454223	-0.482685	-0.151599	-0.360485	-0.459127	0.000344816	-0.194652
YFR007W	YFH7	-0.803262	-0.369044	-0.103114	-0.942772	0.110017	0.185941	-0.598928	-1.61426	-0.246856	-0.074599
YFR008W	FAR7	0.108814	0.186372	0.187957	0.680272	0.898572	0.531075	-0.412972	0.0445445	-0.44403	0.851994
YFR009W	GCN20	0.369843	0.0442113	-0.213097	-0.0787711	-0.534714	-0.275879	0.292647	-0.385357	0.146485	-0.603722
YFR010W	UBP6	0.0289183	0.0261761	0.0407052	-0.0134779	-0.135266	-0.099947	0.328994	0.208323	0.139514	-0.279984
YFR011C	AIM13	-0.3364	-0.62169	0.0294153	0.354524	0.538777	0.148522	-0.385332	0.102235	-0.333363	0.222063
YFR012W	YFR012W	0.57043	-1.59223	0.175728	0.208064	1.19126	1.51251	1.34731	1.1563	-0.18216	-0.603313
YFR012W-A	YFR012W-A	-0.375782	-2.80605	-0.0547101	0.090862	1.32416	1.24241	1.14737	0.440748	-0.578045	-0.0675804
YFR013W	IOC3	-0.041732	-0.332877	-0.212116	-0.269606	-0.800205	-0.280388	0.36484	-0.0167304	0.322132	-0.534086
YFR014C	CMK1	-0.246912	-0.67163	-0.00262839	0.143108	0.817825	0.357311	-0.425006	0.425245	-0.360511	0.603682
YFR015C	GSY1	2.12967	1.62391	0.146773	0.739176	2.4688	2.76778	-0.237737	0.724168	0.68269	0.75656
YFR016C	YFR016C	0.549635	0.328974	-0.0574003	-0.137315	-0.695383	-0.152653	0.148069	-0.170449	0.450743	-0.599536
YFR017C	YFR017C	1.25214	1.4144	0.734309	2.37343	3.12839	3.12664	-0.15267	1.48675	0.286108	1.93938
YFR018C	YFR018C	0.339532	-0.146533	0.149521	-0.403676	0.648558	0.339848	-0.0711739	0.0973264	-0.0336127	-0.0995674
YFR019W	FAB1	-0.287912	-0.615156	-0.208676	-0.105599	-0.344072	-0.124194	0.00745488	0.136916	0.00244987	-0.292164
YFR021W	ATG18	0.197624	0.174962	0.0206218	0.0789025	-0.109069	0.020204	-0.234289	-0.0984839	0.0320951	-0.0897937
YFR022W	ROG3	-0.87458	-0.0647368	0.00116573	-0.225695	0.384925	-0.286586	0.798994	0.875903	-0.227039	0.251902
YFR023W	PES4	-0.515206	-1.41728	-0.179684	-0.462354	0.463182	0.402478	1.50445	1.33346	-0.317032	-0.599848
YFR024C-A	LSB3	-0.0559391	-0.154621	0.16148	-0.274284	0.437229	-0.0244829	-0.118457	0.385854	-0.0803107	-0.394873
YFR025C	HIS2	0.4937	-0.100409	0.0571565	0.123283	0.603815	-0.176685	-0.257285	-0.093675	-0.0550168	-0.0911011
YFR026C	ULI1	-0.473615	-0.103985	-0.238255	0.0550037	0.983053	0.535179	-0.680708	-0.0888457	-0.538159	0.986436
YFR027W	ECO1	-0.0922022	0.546584	0.00984905	0.498667	0.0149493	0.456397	-0.435928	-0.305598	-0.252682	0.38417
YFR028C	CDC14	0.0206107	0.0173162	-0.0916174	-0.395448	-0.485647	-0.198375	-0.136383	-0.31219	-0.165481	-0.423146
YFR029W	PTR3	0.605454	0.528404	0.0774979	0.0729619	-0.279147	-0.124456	0.190941	-0.215478	0.268905	0.190904
YFR030W	MET10	-0.166877	0.156732	-0.137464	-0.239008	-0.149691	-0.161644	0.842478	-0.076121	0.891699	-0.116704
YFR031C	SMC2	-0.279875	0.14726	0.0611661	-0.192979	-0.512419	-0.188009	-0.000195841	-0.231986	0.0626876	-0.0122859
YFR031C-A	RPL2A	-0.502491	-0.874158	-0.0444557	0.421724	0.098282	0.316816	-0.353281	0.0244874	-0.511322	-0.0660387
YFR032C	RRT5	-0.839461	-1.55545	0.0650583	0.369869	-0.183287	-0.103845	-0.23171	0.311293	-0.762339	-0.340837
YFR032C-A	RPL29	-1.53301	-1.58083	-0.142548	0.646978	0.450786	0.740333	-1.12223	-0.0790301	-1.41387	0.595485
YFR032C-B	YFR032C-B	-1.53846	-1.649	0.257072	0.997117	1.67793	1.15141	-0.430204	0.269698	-1.3233	0.548166
YFR033C	QCR6	-0.0896537	-0.478397	-0.071835	0.133012	-0.179835	0.633207	-0.382631	-0.260325	-0.331526	0.417071
YFR034C	PHO4	-0.00230496	-0.231585	0.0193506	-0.186268	-0.282887	0.0644721	-0.548282	-0.452082	-0.386135	-0.00742161
YFR035C	YFR035C	-0.525716	-0.934262	-0.362424	0.390565	1.89064	0.111798	1.02581	2.31059	-0.984656	-0.209208
YFR036W	CDC26	-0.205259	-0.621268	0.104568	-0.451944	0.396719	0.307904	-0.209316	0.185246	-0.654047	0.467318
YFR037C	RSC8	0.192222	-0.183776	-0.113895	-0.398888	-0.371811	-0.203493	-0.246753	-0.409741	-0.116734	-0.421359
YFR038W	IRC5	-0.0396714	0.0212643	-0.00581495	-0.771273	-0.823843	-0.79044	-0.0114471	-0.222158	-0.0401026	-0.319518
YFR039C	YFR039C	0.209194	0.465804	-0.0405574	-0.338777	-0.143966	0.0307699	0.434418	0.36648	0.375941	-0.552302
YFR040W	SAP155	-0.0613893	0.32281	-0.150601	0.114917	-0.703758	-0.418411	0.132216	-0.252741	0.165409	-0.430115
YFR041C	ERJ5	0.425913	0.22237	-0.0119521	-0.408807	0.318965	0.0160557	0.0664482	-0.0809986	0.218454	0.138979
YFR042W	KEG1	0.0534083	-0.103574	0.0525518	-0.377217	0.417581	0.102718	-0.0701032	0.206454	-0.138454	0.0883735
YFR043C	IRC6	-0.360113	-0.731125	-0.0292002	-1.08058	0.235941	-0.319053	-0.356261	0.176446	-0.626044	0.0156752
YFR044C	DUG1	0.119181	-0.179698	0.243901	-0.171904	-0.0431689	-0.070389	0.118516	-0.311926	0.296587	-0.0430523
YFR045W	YFR045W	-0.719853	0.0653899	0.020443	-0.238762	0.605997	0.201506	-0.491915	-0.192428	-0.201198	0.298158
YFR046C	CNN1	0.145655	-0.183214	0.0655258	-0.65775	0.316555	-0.204284	-0.460865	-0.0890873	-0.403378	0.358153
YFR047C	BNA6	-0.65235	-0.733971	0.245581	-0.633489	0.470937	0.120254	-0.646201	-0.528291	-0.333221	0.295887
YFR048W	RMD8	-0.321252	0.213655	0.0205967	0.237309	-0.243652	0.284514	0.058566	0.0318863	0.108026	-0.330728
YFR049W	YMR31	-0.0609332	-0.599642	0.0404456	-0.141955	0.67394	0.264168	-0.421227	0.0744405	-0.360758	0.132342
YFR050C	PRE4	0.0902121	-0.0878484	0.183309	-0.0820822	-0.0250862	0.115038	0.0433799	0.0491091	-0.224718	0.0155753
YFR051C	RET2	0.128948	-0.00101768	-0.0262777	-0.317652	-0.574349	-0.24692	-0.192623	-0.142264	-0.0435206	-0.556562
YFR052W	RPN12	-0.113955	-0.264386	0.0904198	0.18028	0.0541024	0.0534752	-0.144831	0.21249	-0.182795	0.0106665
YFR053C	HXK1	3.92311	3.87457	0.504019	5.47978	2.40358	5.58511	-0.837505	2.12808	2.57489	3.34155
YFR055W	IRC7	-0.947119	-0.398305	0.173642	-0.941477	-0.588704	0.720638	-0.646908	-0.337518	-0.954121	0.856101
YFR057W	YFR057W	-0.419281	-0.436963	-0.126897	0.892431	0.703838	0.620973	-0.166573	0.780353	-0.346101	0.362653
YGL263W	COS12	-3.95492	-2.47483	0.367299	0.24144	1.51952	0.226852	-0.757796	2.24539	-2.05605	0.918402
YGL262W	YGL262W	-0.82001	-0.920087	0.333627	0.469534	3.36791	0.50704	-0.19835	1.86942	-0.727896	0.492272
YGL259W	YPS5	-0.560879	-0.706197	0.278036	0.641893	3.49824	1.81191	-0.265282	1.4355	-0.379012	0.614184
YGL258W-A	YGL258W-A	-1.05622	-1.29194	0.844814	0.523415	3.86393	2.37193	-0.0800218	1.78002	-0.682777	1.72398
YGL258W	VEL1	-0.825493	-0.93515	0.237185	0.215176	1.16439	0.171363	-0.255348	0.282339	-0.342921	0.0507896
YGL257C	MNT2	0.224307	0.123039	-0.260791	-0.287734	-0.0467673	-0.119282	0.0982984	0.186726	0.1185	-0.489922
YGL256W	ADH4	-0.607334	-0.603792	-0.1174	-0.179226	0.0328874	0.0695094	-0.466195	0.177123	-0.536796	0.269357
YGL255W	ZRT1	1.03173	0.070068	-0.132646	-0.649752	0.0171797	0.329062	0.053429	-0.616332	-0.811914	0.513027
YGL254W	FZF1	-0.0963554	-0.936118	0.262413	0.374913	0.684882	0.59998	-0.155351	0.111244	-0.386809	0.834205
YGL253W	HXK2	-0.104109	-0.32632	-0.0465913	-0.0425844	-0.133962	0.0463202	-0.157538	-0.0948446	-0.189524	-0.51277
YGL252C	RTG2	0.00295993	-0.161531	-0.12493	0.357553	0.467775	0.234475	-0.0633141	-0.0881813	-0.0704171	-0.733917
YGL251C	HFM1	0.336553	-0.140416	-0.0606901	-0.00418356	0.459379	0.690242	-2.26173	-2.74558	-0.232636	0.262637
YGL250W	RMR1	0.276533	0.516781	0.161003	0.796702	1.07865	0.966037	-1.29778	0.0539097	-0.326776	0.635279
YGL249W	ZIP2	-0.90724	-0.977254	-0.563274	-0.2215	1.94764	0.88544	-1.1904	-0.477111	-0.200401	0.0485768
YGL248W	PDE1	0.208713	0.376107	0.118248	0.738612	0.225675	0.43445	-0.624422	0.240577	0.0813807	0.200081
YGL247W	BRR6	-0.275596	-0.431882	0.196474	0.130945	0.551591	0.302662	-0.262205	0.396556	-0.389041	0.595892
YGL246C	RAI1	-0.325015	-0.0846659	0.0719894	-0.139543	-0.164135	-0.0396882	-0.162913	0.22762	-0.307136	0.132786
YGL245W	GUS1	-0.0341738	-0.140339	-0.0711583	0.071734	-0.299045	-0.321249	0.0418051	-0.293689	-0.0573951	-0.43037
YGL244W	RTF1	0.229058	0.155661	-0.224983	-0.430834	-0.513774	-0.339499	0.14589	-0.389012	0.0945115	-0.445642
YGL243W	TAD1	-0.464213	-0.498241	0.00235422	-0.700443	0.0147481	-0.45735	-0.234512	0.209572	-0.475299	0.268251
YGL242C	YGL242C	-0.12218	-0.564408	-0.12451	-0.201243	0.484672	0.168787	-0.58245	0.0923246	-0.39181	0.0193342
YGL241W	KAP114	-0.0203917	0.184593	-0.108551	-0.575559	-0.496128	-0.644636	0.176749	-0.385665	0.12549	-0.389194
YGL240W	DOC1	-0.207975	0.083349	0.134035	0.424448	0.768053	0.866154	-0.384162	0.0409877	-0.673363	0.207129
YGL238W	CSE1	-0.453149	0.0836799	-0.100233	-0.122329	-0.35119	-0.577228	0.178107	-0.146818	0.0629895	-0.236353
YGL237C	HAP2	0.221385	-0.0646873	0.166379	0.517919	0.509147	0.694757	-0.514036	-0.449979	-0.389301	0.474335
YGL236C	MTO1	0.0338608	-0.158763	0.346523	-0.456612	-0.345867	0.0567021	-0.190408	-0.0849453	0.0825991	-0.0407813
YGL235W	YGL235W	-0.450264	-0.797597	-0.235661	0.613608	0.502753	0.482679	-0.0668764	0.661304	-0.576492	0.315335
YGL234W	ADE5,7	-0.364955	-0.225819	0.0987037	-0.226913	-0.659167	-0.575802	0.179141	-0.18896	-0.131977	-0.274292
YGL233W	SEC15	0.397653	0.378716	-0.212153	-0.335119	-0.359519	-0.284709	0.300449	-0.229338	0.257046	-0.713182
YGL232W	TAN1	-0.634183	-0.866939	0.0470937	-0.562119	0.176746	-0.526785	-0.718107	0.149068	-0.749893	0.0472377
YGL231C	EMC4	-0.529961	-0.622332	0.0268367	-0.0552319	0.117633	-0.0920593	-0.500379	0.0334173	-0.436038	0.00748989
YGL230C	YGL230C	0.347931	-0.656679	0.474355	1.12082	0.856895	0.732035	0.614572	1.79645	-0.89879	0.314716
YGL229C	SAP4	0.0177484	0.4308	0.287936	-0.201714	0.234905	-0.209778	0.0988515	0.669076	0.393843	-0.277308
YGL228W	SHE10	0.534124	0.636122	-0.0811191	-0.510362	-0.246836	-0.231408	0.52879	-0.358619	0.670204	-0.454784
YGL227W	VID30	0.0138095	0.494923	0.188032	0.313925	0.127392	0.13903	-0.142388	0.216615	0.335284	-0.243819
YGL226W	MTC3	-0.101773	-0.461464	-0.141557	0.384465	0.666673	0.174704	-0.144867	0.623813	-0.622717	0.321295
YGL226C-A	OST5	-1.10505	-0.993468	-0.245313	0.0198219	0.26228	-0.0447247	-0.827106	0.0942511	-0.905664	0.263245
YGL225W	VRG4	0.200723	0.142773	-0.115715	-0.149168	-0.0530746	-0.234269	0.268264	-0.428513	0.13274	-0.378991
YGL224C	SDT1	0.171732	0.0662367	0.439681	-0.287253	0.209867	-0.144677	0.297946	0.842927	-0.10878	0.518243
YGL223C	COG1	-0.0456437	-0.157138	-0.0866167	-0.146704	-0.301932	-0.0782852	-0.267043	0.274743	-0.273239	0.324266
YGL222C	EDC1	0.271124	-0.0919895	-5.12228	1.31864	0.85837	0.442738	0.109877	-0.237981	0.0502869	1.01292
YGL221C	NIF3	-0.38771	-0.35296	-0.0144399	-0.257964	0.0954401	-0.346675	-0.191339	0.112766	-0.330977	-0.140095
YGL220W	FRA2	-0.724418	-1.06224	-0.0601696	-0.263981	0.599096	-0.177951	-0.635323	-0.0162712	-0.821642	0.00154236
YGL219C	MDM34	-0.0161496	0.161555	0.111395	0.235869	0.130815	0.139034	-0.106746	0.0143252	-0.044093	0.112671
YGL216W	KIP3	-0.447808	0.106816	0.274448	-0.520552	-0.435357	-0.234059	0.00170627	-0.514879	-0.153696	-0.149428
YGL215W	CLG1	0.157615	0.173593	-0.190176	0.158172	-0.328569	-0.183426	0.271714	-0.237636	0.0766024	-0.391528
YGL213C	SKI8	0.0218591	0.0137326	-0.0134186	-0.473703	-0.0964854	-0.244264	-0.00177127	-0.11195	-0.0377824	-0.330985
YGL212W	VAM7	-0.0550199	-0.200721	-0.20824	0.0693993	0.405151	0.0463622	-0.285553	-0.376312	-0.286319	0.257939
YGL211W	NCS6	-0.295199	-0.468399	-0.0530072	-0.302406	-0.131046	-0.024933	-0.471176	-0.296605	-0.553035	0.314076
YGL210W	YPT32	-0.495592	-0.534465	0.0408313	-0.129844	0.205119	0.282048	-0.511606	-0.222469	-0.391248	0.313172
YGL209W	MIG2	-0.0513296	-0.281948	0.223455	1.28159	0.692846	0.640431	0.697563	0.277322	0.205302	0.834108
YGL208W	SIP2	0.409658	0.213159	0.0720614	0.541826	0.739114	0.603549	-0.81837	-0.139404	-0.0301993	0.285988
YGL207W	SPT16	0.0612444	0.275045	-0.184503	0.0110762	-0.599606	-0.59074	0.0992682	-0.457028	0.25198	-0.608409
YGL206C	CHC1	0.56878	0.322241	-0.236822	0.483268	-0.148191	0.257552	0.627644	-0.540709	0.765674	-0.718353
YGL205W	POX1	0.657496	-0.61226	-0.070402	1.47209	1.76093	0.473758	0.134296	0.506925	0.450907	0.0212722
YGL203C	KEX1	0.349541	0.544629	0.00305563	-1.04339	-0.592567	-0.917378	0.776062	-0.615619	0.704381	-0.814573
YGL202W	ARO8	0.257229	-0.0808744	0.00140824	-0.137549	-0.330932	-0.111877	0.191614	-0.0410405	0.0678441	-0.489536
YGL201C	MCM6	0.161633	0.368442	-0.194035	0.0757217	-0.44796	-0.224282	0.214919	-0.14376	0.166019	-0.591478
YGL200C	EMP24	-0.0508206	-0.564752	-0.0606201	-0.380182	0.296022	-0.24799	-0.494903	0.000430057	-0.28735	-0.287466
YGL198W	YIP4	-0.457907	-0.479261	-0.147715	-0.0299827	0.373887	0.0369461	-0.370297	0.0598659	-0.223827	0.130545
YGL197W	MDS3	0.404501	0.351116	-0.120083	0.558476	-0.210242	0.207953	0.45359	0.0921433	0.473338	-0.52457
YGL196W	DSD1	-0.159941	-0.19513	0.150144	-0.151905	0.242084	-0.179108	-0.183042	0.0947374	0.0813759	-0.281382
YGL195W	GCN1	0.211156	-0.106507	-0.185964	-0.08292	-0.440111	-0.310011	0.229182	-0.724232	0.245054	-0.429469
YGL194C	HOS2	-0.198522	0.0189327	0.297207	0.454276	0.662551	-0.567399	0.29199	0.113721	0.056507	0.629186
YGL192W	IME4	-0.155647	0.0776139	0.0295404	0.734967	0.284274	0.496988	0.25505	0.582115	0.0038245	0.0995767
YGL191W	COX13	-0.234975	-0.539209	-0.10997	0.638737	0.436471	1.13661	-0.394176	-0.105841	-0.424499	0.534773
YGL190C	CDC55	0.224607	0.32467	-0.183362	0.0393887	-0.438703	-0.264655	-0.0502925	-0.529795	0.153944	-0.437598
YGL189C	RPS26A	-0.721292	-1.15734	-0.218808	0.761718	0.454429	0.496448	-0.884958	0.113846	-0.964867	0.358868
YGL188C-A	YGL188C-A	-1.46008	-1.91297	-0.661114	0.971423	0.490751	0.689266	-0.871853	0.910535	-1.743	1.84969
YGL187C	COX4	0.485562	-0.58347	-0.0671384	0.849269	0.017916	1.71676	-0.862072	-0.972375	0.0137006	0.543453
YGL186C	TPN1	0.667789	0.499463	0.236704	-0.871774	-0.722911	-0.42639	0.56463	-0.23964	0.531684	0.314286
YGL185C	YGL185C	0.245383	-0.189597	-0.127424	0.165645	0.587642	-0.0243175	-0.332055	-0.0976559	0.134272	-0.405312
YGL184C	STR3	-0.751864	-0.669702	0.530752	0.099828	-1.38517	0.0382859	1.32879	0.074423	0.722824	-0.656159
YGL183C	MND1	-1.41383	-0.34601	0.149913	0.166441	1.00244	0.299225	0.568887	1.77148	-0.660445	0.226087
YGL181W	GTS1	0.0176248	-0.183856	0.14918	-0.203457	0.168679	-0.0898979	-0.17596	0.0761746	-0.166318	0.0524116
YGL180W	ATG1	0.208954	1.08271	0.0830055	0.0657838	-0.118944	0.0236715	1.08914	0.595886	0.987024	-0.512078
YGL179C	TOS3	0.407621	0.401241	0.193692	-0.455312	0.31328	0.751942	0.629981	1.0162	0.0252363	-0.085092
YGL178W	MPT5	-0.0609216	0.369192	-0.158169	0.219159	-0.733889	0.0288151	0.605615	-0.583846	0.177882	0.025274
YGL176C	YGL176C	-0.631541	-0.0828308	-0.186532	-0.23946	-0.0510155	-0.017529	-0.280564	-0.21058	-0.144689	-0.173151
YGL175C	SAE2	-0.660902	-0.488823	-0.257293	0.184803	0.6603	0.411326	-0.151097	0.219721	-0.874765	0.42924
YGL174W	BUD13	0.164111	-0.245202	0.118631	-0.155874	0.366495	-0.106001	-0.530485	-0.370694	-0.36108	0.374479
YGL173C	KEM1	0.290404	0.314094	-0.0325798	0.171828	-0.423523	-0.181785	0.368771	-0.470756	0.385115	-7.71592
YGL172W	NUP49	0.155157	0.0105794	-0.0106964	-0.392032	-0.0916464	-0.0816742	-0.0330112	-0.254903	-0.00889034	-0.190758
YGL171W	ROK1	-0.194844	-0.0577015	0.0384333	-0.961635	-1.12938	-0.71262	0.135696	-0.486695	0.0107187	-0.27578
YGL170C	SPO74	-0.0619064	-0.530776	-0.242824	0.0386226	0.0694307	-0.0604432	-0.0196421	0.364128	-0.45645	-0.408686
YGL169W	SUA5	-0.317084	-0.244656	0.0134322	-0.290618	-0.168546	-0.257841	-0.0717254	0.0678079	-0.253713	-0.184598
YGL168W	HUR1	-0.280241	-0.455229	-0.212567	1.11207	0.795427	0.365809	-0.056185	-0.199404	-0.394083	-0.0120474
YGL167C	PMR1	0.384862	0.553205	-0.0797196	0.312573	0.0203944	-0.27546	0.713851	0.0365456	0.587286	-0.399156
YGL166W	CUP2	-0.579071	-0.402786	-0.0334015	0.343305	0.827171	0.293244	-0.690965	0.276743	-0.746432	0.301991
YGL164C	YRB30	0.128245	0.11679	0.261326	0.343595	-0.0971118	0.170971	0.103072	-0.068816	0.303804	0.339442
YGL163C	RAD54	0.0644678	0.571148	-0.100735	-0.240774	-0.066323	-0.236485	0.257038	0.0144045	0.154298	-0.498685
YGL162W	SUT1	-0.331212	-0.124617	0.00892686	-0.315075	-0.37842	0.243731	0.117474	0.109081	-0.4594	0.413911
YGL161C	YIP5	-0.0938139	-0.0472426	0.0795806	-0.0488981	0.356867	0.00948723	-0.0286508	0.0404951	0.135812	-0.087824
YGL160W	AIM14	0.629948	0.61918	-0.0782494	-0.00660249	0.169548	-0.0162191	1.02718	-0.205781	0.849238	-0.599556
YGL159W	YGL159W	-0.570542	-0.73389	0.0345643	-0.367704	0.272081	0.112663	-0.0465948	-0.15874	-0.0896568	-0.0731956
YGL158W	RCK1	-0.812928	-1.48213	0.0561034	-0.54109	1.42958	0.0431161	0.711127	-0.203349	-0.0847663	-0.40641
YGL157W	ARI1	-0.0429527	-0.549441	0.0647639	0.155736	0.841415	-0.67971	-0.0119455	0.267055	0.0469557	0.318638
YGL156W	AMS1	0.464994	-0.576872	0.391896	1.16985	1.30655	0.739223	0.524043	1.84051	0.363652	0.533403
YGL155W	CDC43	-0.204315	-0.359991	0.0635167	-0.37303	-0.0143524	-0.191144	-0.309352	0.00254088	-0.315223	-0.0360726
YGL154C	LYS5	-0.298819	-0.0778155	0.142921	0.121957	0.686976	-0.0349802	0.259782	0.207481	-0.190641	0.592361
YGL153W	PEX14	0.100402	0.117811	-0.10138	-0.155567	0.0373843	-0.190939	-0.591586	-1.59802	0.0567429	-0.330941
YGL151W	NUT1	0.144458	0.474692	-0.213724	-0.355247	-0.646594	-0.400999	0.184973	-0.303538	0.372607	-0.429524
YGL150C	INO80	0.47992	0.222072	-0.30806	0.0300251	-0.447639	-0.182331	0.585162	-0.636845	0.66706	-0.60086
YGL148W	ARO2	-0.000134873	-0.322587	0.11686	-0.718966	-0.418598	-0.496719	-0.0155203	-0.205619	-0.0929499	-0.367936
YGL147C	RPL9A	-0.700946	-0.827651	0.00854993	0.475201	0.0953619	0.362311	-0.620376	0.00163297	-0.587508	0.149065
YGL146C	RRT6	0.865543	-0.393425	0.317057	0.691686	1.42269	0.911209	-0.390803	0.374527	-0.232197	0.232005
YGL145W	TIP20	-0.315618	0.232221	-0.104055	0.0481156	-0.0945015	-0.153167	0.242432	0.0492336	-0.0969108	0.0221437
YGL144C	ROG1	-0.363224	-0.0616249	-0.249241	-0.802235	-0.335653	-0.199856	-0.0840928	-0.109607	-0.238431	-0.413805
YGL143C	MRF1	-0.16334	-0.632213	0.119856	0.0969568	0.364417	0.0685984	-0.318579	0.158062	-0.184734	-0.220879
YGL142C	GPI10	0.584251	0.675528	-0.263411	-0.240578	0.134119	-0.192385	0.657333	-0.335989	0.660724	-0.878902
YGL141W	HUL5	0.149632	0.357793	0.00736899	-0.112088	-0.118001	-0.0523955	0.386195	0.164825	0.352877	-0.314188
YGL140C	YGL140C	0.623202	0.541596	-0.275507	-0.00933885	-0.281748	-0.461764	0.763224	-0.343089	0.695672	-0.763443
YGL139W	FLC3	0.700487	0.680229	-0.357015	-0.922562	-0.60786	-0.538527	0.943035	-1.07661	0.735319	-0.750392
YGL138C	YGL138C	-0.0877319	-0.451333	0.0161227	0.533275	0.225568	0.481081	0.00639597	0.610622	-0.176638	0.12058
YGL137W	SEC27	-0.045658	-0.0199883	-0.146518	-0.532916	-0.502549	-0.237984	0.0935566	-0.334421	0.175818	-0.611157
YGL136C	MRM2	-0.196391	-0.0956999	0.12454	0.354795	0.462243	0.300939	-0.200185	0.387107	-0.383934	0.46332
YGL135W	RPL1B	-0.342758	-0.675595	-0.0326679	0.412038	0.123549	0.396767	-0.377108	-0.0106316	-0.500326	-0.012451
YGL134W	PCL10	0.155947	-0.11744	0.119574	-0.116849	0.559304	0.0056173	-0.474236	-0.0721501	-0.335218	0.366622
YGL133W	ITC1	0.182562	0.291163	-0.0786754	-0.378354	-0.968726	-0.31909	0.218533	-0.0958642	0.272187	-0.517693
YGL131C	SNT2	0.370812	0.504635	-0.217626	0.101501	-0.451027	0.211617	-0.00400485	-0.897816	0.221662	-0.836119
YGL130W	CEG1	-0.0380329	0.0993899	0.0163603	-0.25202	-0.104923	-0.279124	0.0184933	-0.0352784	0.0338515	-0.0864214
YGL129C	RSM23	0.451504	0.19193	-0.0232744	-0.174164	0.116618	0.0826612	-0.23606	-0.236053	0.0377585	-0.271804
YGL128C	CWC23	0.0648545	-0.182436	0.102783	-0.602293	0.211516	0.0480414	-0.357434	0.153201	-0.351078	0.566338
YGL127C	SOH1	-0.672421	-0.425921	-0.263645	0.281965	0.492333	0.467654	-0.965318	-0.42001	-0.733785	0.468457
YGL126W	SCS3	0.0834877	-0.38009	-0.0417563	-0.00443497	0.26838	0.816468	-0.54591	0.0684389	-0.256793	-0.498362
YGL125W	MET13	0.108397	0.377487	-0.325346	0.195911	0.0316912	-0.240434	1.26634	0.568749	0.871942	-0.121821
YGL124C	MON1	-0.500002	-0.297492	-0.017464	-0.01018	0.0130699	-0.142471	-0.323912	0.240494	-0.260445	-0.343541
YGL123W	RPS2	-0.415949	-0.743515	0.0032946	0.3603	0.0519117	0.383011	-0.513408	0.00742284	-0.607671	-0.0840892
YGL122C	NAB2	0.142387	0.171412	0.159068	-0.32912	-0.465307	-0.187802	0.781786	0.416275	0.160045	-0.258589
YGL121C	GPG1	0.0747348	0.122755	0.615637	3.13938	1.94171	3.03062	0.341539	1.92865	-0.314232	1.50591
YGL120C	PRP43	0.0152742	0.0257857	-0.0300512	-0.706693	-0.813953	-0.531867	0.165892	-0.670537	0.064693	-0.556249
YGL119W	COQ8	0.087076	-0.0833183	0.0498224	-0.369993	-0.179314	-0.304518	0.29336	0.260317	0.364884	-0.456342
YGL117W	YGL117W	-0.0627545	-0.584739	0.322442	-0.0202363	0.788943	0.57167	-0.364266	0.88353	-0.343327	1.47056
YGL116W	CDC20	-0.0891826	0.157487	-0.0110786	0.207623	-0.641918	-0.236802	0.11991	-0.479851	0.0581464	0.0287249
YGL115W	SNF4	0.286318	-0.114896	-0.0383019	-0.415891	0.091749	-0.315919	-0.0474643	0.0905574	-0.116593	-0.292136
YGL114W	YGL114W	0.218349	0.439894	0.138017	-0.343311	-0.161624	-0.375809	0.854149	-0.316725	0.747168	-0.250831
YGL113W	SLD3	-0.198656	-0.019171	-0.0588089	-0.135376	-0.173371	-0.173689	-0.0450164	-0.261666	-0.300198	-0.418576
YGL112C	TAF6	-0.294789	0.124859	-0.158145	-0.184694	0.0109173	-0.166954	-0.170928	-0.0969994	-0.104016	-0.481611
YGL111W	NSA1	-0.0496873	-0.024831	0.0189528	-0.264164	-0.656868	-0.521673	-0.0110686	-0.178659	-0.0939822	-0.330662
YGL110C	CUE3	-0.0411164	0.315561	-0.12808	0.400168	0.0303069	-0.221252	0.330599	-0.547457	0.246941	-0.203619
YGL108C	YGL108C	0.0165718	-0.578228	-0.152618	-0.103676	0.360077	-0.0149822	-0.773566	-0.126718	-0.93425	0.587195
YGL107C	RMD9	0.23454	0.242238	-0.0391869	-0.232056	0.0116985	0.31361	-0.0325019	-0.200801	0.0125861	-0.304541
YGL106W	MLC1	-0.619139	-1.09086	-0.0916927	-0.359695	-0.0188773	-0.106853	-0.748318	-0.244269	-0.787045	0.150391
YGL105W	ARC1	-0.0355057	-0.200473	0.00378774	-0.142932	-0.363712	-0.254179	-0.173022	-0.132537	-0.178026	-0.179596
YGL104C	VPS73	-0.89942	0.891243	0.0646074	0.666986	1.18517	1.35387	-0.45482	0.782179	0.649593	-0.333875
YGL103W	RPL28	-0.683432	-0.865731	-0.0536495	0.845503	0.503479	0.681485	-0.645152	0.00795662	-0.743059	0.486705
YGL101W	YGL101W	-0.595317	-0.675293	-0.0339554	-0.262885	0.120195	-0.36359	-0.916417	-0.441486	-0.642203	0.0564797
YGL100W	SEH1	-0.282299	-0.251218	-0.00845758	-0.180441	0.311063	-0.143713	-0.334637	0.196977	-0.390586	-0.204013
YGL099W	LSG1	0.174946	-0.0571713	-0.0997684	-0.587506	-0.837732	-0.514929	0.132935	-0.525878	-0.0324672	-0.708918
YGL098W	USE1	-0.389913	-0.318951	0.0493175	0.0769183	0.726163	0.443492	-0.497812	-0.0958712	-0.367543	0.138512
YGL097W	SRM1	-0.0776853	-0.258488	0.0613692	-0.510831	-0.307081	-0.494742	-0.208866	-0.370687	-0.0399362	-0.380571
YGL096W	TOS8	0.0632677	0.654355	-0.111683	0.291839	0.770418	0.763038	0.573462	0.883873	0.0773918	0.778822
YGL095C	VPS45	0.0863001	0.121627	0.0352413	0.279826	0.2274	0.284292	0.196632	0.242881	0.037288	-0.265488
YGL094C	PAN2	-0.254076	-0.128621	0.0818925	-0.187443	-0.421106	-0.376749	-0.178307	-0.33767	-0.0123529	-0.255548
YGL093W	SPC105	-0.252791	0.129736	-0.0223689	-0.527716	-0.404221	-0.476919	0.0870485	-0.30484	0.178994	-0.486632
YGL092W	NUP145	0.12154	-0.0782881	-0.343901	-0.102423	-0.542325	-0.452567	0.270363	-0.445241	0.178484	-0.591109
YGL091C	NBP35	0.171269	0.0242974	0.104424	0.370216	0.407661	0.178512	0.161168	0.30104	-0.140911	0.165011
YGL090W	LIF1	-0.37098	0.399031	0.0203861	-0.035905	0.280765	-0.0631557	-0.0628331	-0.046496	0.0691465	0.198578
YGL089C	MF(ALPHA)2	-0.903983	-1.18783	0.126471	0.78589	0.321567	0.550821	-0.253663	0.288035	-0.839679	0.509565
YGL087C	MMS2	-0.617206	-1.05071	0.0771548	0.833253	0.797376	0.379357	-0.413157	0.541504	-0.498731	0.557402
YGL086W	MAD1	-0.0889848	0.128374	-0.0799327	0.157691	-0.359548	-0.407516	-0.142558	-0.142875	-0.145739	-0.246196
YGL085W	LCL3	-0.382135	-0.543979	0.00289966	-0.408018	0.260014	-0.0118928	-0.323187	0.131338	-0.382929	0.560578
YGL084C	GUP1	0.640478	0.809086	-0.221178	-0.297725	0.105375	-0.0175083	0.757142	-0.370487	0.842098	-0.683168
YGL083W	SCY1	-0.0678483	0.0940763	-0.187718	-0.321715	-0.665038	-0.577719	0.202925	-0.336728	0.175548	-0.77049
YGL082W	YGL082W	-0.117632	-0.0812651	-0.0136949	-0.0792232	-0.00567843	0.0219157	-0.11472	-0.0599652	-0.0389693	-0.168556
YGL081W	YGL081W	-1.08716	-1.09292	0.195949	-0.727533	0.645415	0.646322	-0.524317	-0.399542	0.0565817	0.296933
YGL080W	FMP37	-0.239167	-0.524436	-0.0179265	0.310572	0.355157	0.301973	-0.290178	-0.111847	-0.503427	0.294819
YGL079W	KXD1	-0.227192	-0.270299	-0.00842277	-0.140629	0.284634	0.00566704	-0.620403	-0.0288783	-0.697907	0.17576
YGL078C	DBP3	-0.336719	-0.257284	0.0427843	-0.433999	-0.912407	-0.521642	-0.0197106	-0.530437	-0.0373074	-0.491199
YGL077C	HNM1	0.65575	0.979689	-0.362665	-0.121226	0.233495	-0.481456	0.746645	-0.767418	0.89469	-0.582614
YGL076C	RPL7A	-0.501651	-0.833277	-0.0344888	0.516533	0.0165781	0.442572	-0.476954	0.0101385	-0.476647	0.0901695
YGL075C	MPS2	0.144762	0.268269	0.0875381	-0.217368	0.25053	0.3245	-0.261023	-0.227641	-0.141068	0.171501
YGL073W	HSF1	-0.124471	0.37281	0.0153083	-0.2173	-0.615812	-0.232834	0.201256	-0.243389	0.0883902	-0.151288
YGL071W	AFT1	0.254051	0.335016	-0.0624144	-0.0118947	-0.565367	-0.251383	0.334549	-0.155348	0.104567	-0.20159
YGL070C	RPB9	-0.374121	-0.663251	0.0361604	0.186685	0.535571	0.041946	-0.560847	-0.227697	-0.775502	0.371346
YGL068W	MNP1	-0.216429	-0.652299	0.0276283	0.0104013	0.440179	-0.0512181	-0.728208	-0.131939	-0.589387	0.126916
YGL067W	NPY1	0.173996	-0.108057	0.057561	-0.471204	0.0758681	-0.203899	-0.835953	-0.825128	-0.121141	-0.29184
YGL066W	SGF73	0.457152	0.556143	0.0509803	0.137338	-0.400542	0.0315686	0.272318	-0.639875	0.311787	-0.0126301
YGL065C	ALG2	0.363906	0.521631	-0.0188822	-0.843427	-0.445367	-0.313417	0.273836	-0.292611	0.452738	-0.293925
YGL064C	MRH4	0.429352	0.272364	0.123199	-0.0532273	0.0132275	0.282239	0.00438813	0.0145153	0.116526	-0.0487042
YGL063W	PUS2	0.05713	-0.161228	-0.07958	0.324674	0.671174	0.429315	-0.331615	-0.174126	-0.342737	0.238169
YGL062W	PYC1	0.118139	0.251164	0.160212	0.192247	-0.077205	0.687794	0.532363	0.561389	0.763001	0.242411
YGL061C	DUO1	-0.265535	-0.118644	0.0365243	-0.490788	0.140282	-0.219972	-0.459516	-0.507759	-0.370341	-0.150389
YGL060W	YBP2	0.106877	0.196926	-0.263079	-0.135911	-0.306579	-0.307713	0.222863	-0.309853	0.260733	-0.764566
YGL059W	PKP2	-0.374242	0.379607	0.186306	0.455502	0.53484	-0.0902616	-0.286767	0.274261	0.00360668	0.386298
YGL058W	RAD6	-0.162673	-0.556003	0.00834727	0.000121787	0.299033	-0.172735	-0.585404	-0.0388287	-0.531102	0.115273
YGL057C	GEP7	-0.0606081	-0.239609	0.0392453	0.161908	0.430083	0.331651	-0.366893	0.141584	-0.112291	0.0793752
YGL056C	SDS23	0.57822	0.326445	0.190985	0.404085	-0.32516	-0.0254517	0.201228	-0.128981	0.112232	0.252473
YGL055W	OLE1	0.043462	0.327316	-0.0981008	0.862307	0.471603	0.591168	0.576837	-0.351487	0.44688	-0.226135
YGL054C	ERV14	-0.175274	-0.432662	-0.142378	0.431566	0.269719	-0.0165885	-0.307337	0.0808149	-0.297501	-0.14218
YGL053W	PRM8	0.289852	0.267746	0.156216	0.841263	0.815086	0.621168	-0.423929	0.298679	-0.0799552	0.548683
YGL051W	MST27	-1.43843	-1.07853	0.233152	-0.152751	1.05078	-0.187674	-0.667381	-0.288955	-0.321176	-0.249207
YGL050W	TYW3	-0.670487	-0.514764	0.0789414	0.210407	0.125122	-0.0307383	-0.207203	0.194323	-0.338365	-0.0833378
YGL049C	TIF4632	0.607244	0.344444	-0.182672	-0.243997	-0.252974	-0.329466	0.400575	-0.336908	0.423326	-0.482331
YGL048C	RPT6	0.0676724	-0.116297	0.0320744	-0.155628	-0.2691	-0.0556807	0.0160042	0.0565739	-0.0285408	-0.195945
YGL047W	ALG13	0.249437	-0.316061	0.174579	-0.227	0.765527	0.0995276	-0.632796	0.500236	-0.264289	0.0824972
YGL045W	RIM8	0.201606	0.316328	-0.115694	0.457473	0.453425	0.658342	-0.0813584	0.434805	-0.190727	0.407885
YGL044C	RNA15	0.0893047	0.264681	0.0783116	0.0680217	-0.164725	-0.0860127	0.187779	-0.148175	-0.109984	0.233594
YGL043W	DST1	-0.117555	-0.263082	-0.0121125	-0.248122	-0.122832	-0.353645	-0.268729	-0.0729939	-0.378736	0.00803224
YGL041C-B	YGL041C-B	-1.07385	-0.872359	0.166584	-0.0592296	0.776197	-0.33567	0.540182	1.1621	-1.12153	0.503406
YGL040C	HEM2	-0.121971	-0.342551	-0.016335	-0.205287	-0.150385	-0.174559	0.0590802	0.279375	-0.129561	-0.344463
YGL039W	YGL039W	-0.234039	-1.10902	-0.0340292	-0.367539	0.491571	-0.225209	0.172901	0.287736	-0.0277465	-0.221067
YGL038C	OCH1	-0.411199	0.33004	-0.411108	0.144074	-0.372416	0.346739	-0.239612	-0.5563	0.0944601	-0.729283
YGL037C	PNC1	0.795524	0.454615	0.146393	1.1289	1.64567	1.28077	-1.05076	0.71098	0.0446517	0.522847
YGL036W	YGL036W	-0.0249619	0.247812	0.132006	-0.36694	-0.930464	-0.23648	0.498687	0.21727	0.196974	-0.0896288
YGL035C	MIG1	0.224539	0.20726	-0.247194	0.441212	-0.971436	0.448557	-0.273297	-0.409507	-0.0336334	-0.637924
YGL033W	HOP2	-0.5745	-0.718105	-0.0600415	1.39611	0.531859	0.781701	-0.0462847	0.548571	-0.420298	0.325476
YGL032C	AGA2	-0.973866	-0.617845	-0.175626	1.4417	-1.30754	-0.649587	-0.286406	-0.351836	-0.457506	-0.271599
YGL031C	RPL24A	-0.707904	-1.02939	-0.121556	0.414781	0.097091	0.436852	-0.622065	-0.020889	-0.819761	0.139615
YGL030W	RPL30	-0.635822	-0.987435	-0.162525	0.702385	0.439245	0.693829	-0.678125	-0.0675706	-0.820698	0.24306
YGL029W	CGR1	-0.981786	-1.17519	-0.20682	-0.614931	-0.754538	-0.656828	-0.868966	-0.565072	-1.22591	0.355238
YGL028C	SCW11	1.25543	1.13724	-0.195961	1.63975	-0.110754	1.26505	0.885312	-0.510438	0.94993	-0.207044
YGL027C	CWH41	1.11481	0.75328	-0.110985	-0.569524	-0.352623	-0.5308	0.72226	-0.669625	1.18314	-0.718014
YGL026C	TRP5	0.146853	-0.00539428	0.162115	-0.0652522	-0.178974	-0.384646	0.496265	0.0580306	0.302477	-0.197297
YGL025C	PGD1	0.327026	0.180764	-0.0463072	-0.220744	-0.171916	0.106004	-0.450756	-0.661401	-0.159654	0.264886
YGL023C	PIB2	0.0953404	-0.0870926	-0.309612	-0.282739	-0.313978	-0.224292	-0.286241	-0.435646	0.109309	-0.600242
YGL022W	STT3	0.737237	0.638841	-0.143319	-0.352944	-0.273311	-0.375987	0.689352	-0.62027	0.701093	-0.590983
YGL021W	ALK1	0.329195	0.832561	-0.0773054	0.345111	-0.442463	-0.186063	0.527976	-0.0687017	0.573056	0.0783406
YGL020C	GET1	0.0644038	0.00102437	-0.122126	-0.477017	-0.0677156	-0.416933	0.193561	-0.204517	-0.0257239	-0.154847
YGL019W	CKB1	-0.148051	-0.441019	-0.14693	-0.332027	-0.140732	-0.274228	-0.447469	-0.158093	-0.365601	-0.258672
YGL018C	JAC1	0.0443047	-0.30613	0.122868	-0.0846829	0.467363	0.0296339	-0.636197	-0.455389	-0.357602	0.17601
YGL017W	ATE1	0.125589	-0.033535	-0.0630032	-0.437256	-0.0899079	-0.337109	-0.609544	-0.196072	-0.133009	-0.184174
YGL016W	KAP122	0.402595	0.310175	-0.361996	-0.286104	-0.585869	-0.577653	1.36321	0.0782771	0.54998	-0.651814
YGL015C	YGL015C	0.880682	-0.417986	-0.280285	0.536619	1.3329	0.920574	0.165296	0.0576464	-0.493681	0.671341
YGL014W	PUF4	0.294518	0.165103	-0.155976	-0.330257	-1.13078	-0.439268	0.35808	-0.567499	0.246677	-0.369243
YGL013C	PDR1	0.0211042	0.214167	0.19278	-0.0322188	-0.517282	0.0101674	0.254162	-0.15643	0.141459	0.0575967
YGL012W	ERG4	0.0525052	0.547827	0.0278076	-0.434879	-0.358572	-0.382027	0.925494	-0.428781	0.942196	-0.266592
YGL011C	SCL1	-0.0877554	-0.334885	0.0484319	0.110129	0.193133	0.116396	-0.422868	-0.0874438	-0.167432	-0.0736143
YGL010W	YGL010W	-0.889475	-0.460097	0.0120692	0.251393	1.01996	0.571699	-0.0152397	0.195489	-0.414399	0.650837
YGL009C	LEU1	-0.344071	-0.0662119	-0.0315373	-0.185406	-1.72542	-1.38385	-0.00903895	0.133138	-0.266404	-0.0189296
YGL008C	PMA1	0.305337	0.0717757	-0.206273	0.583118	-0.483573	0.210993	0.40963	-0.583728	0.484927	-0.676144
YGL007C-A	YGL007C-A	-0.737222	-1.20578	-0.0897691	1.88357	1.62181	0.855633	0.0528055	1.12832	-1.10564	0.876393
YGL006W-A	YGL006W-A	-0.732879	-0.584576	-0.20094	1.34008	1.53985	0.66337	0.00840648	0.213443	-0.69816	0.381905
YGL006W	PMC1	0.727018	0.836224	0.015179	0.837282	0.280856	0.651958	0.737284	0.497977	0.821042	-0.51029
YGL005C	COG7	-0.528424	-0.528218	0.046188	-0.0446766	0.582985	-0.320477	-0.584405	-0.129007	-0.405896	0.0581009
YGL004C	RPN14	0.149958	-0.293263	0.213136	-0.400786	0.114987	-0.220305	-0.327948	-0.108641	0.0474867	0.0919932
YGL003C	CDH1	-0.289018	-0.0515201	-0.0380511	0.313084	0.129248	0.292878	-0.143685	-0.0151479	-0.0246287	-0.248531
YGL002W	ERP6	-0.696907	-0.509706	0.0413417	-0.0639387	0.519243	-0.494288	-0.455146	0.121607	-0.318658	0.0726653
YGL001C	ERG26	-0.225543	-0.393904	0.092092	-0.480115	-0.0569931	-0.144631	-0.195912	0.164913	-0.095093	-0.446104
YGR001C	YGR001C	-0.133591	-0.376714	-0.0987373	-0.0935959	0.280054	-0.0455963	0.0949129	0.0115535	-0.307154	-0.10377
YGR002C	SWC4	0.139633	0.236118	0.000796956	0.409947	0.262598	0.317452	0.0328597	0.0857581	-0.106237	-0.0380234
[truncated: 3,657 more rows]

## Sheet: RA
ORF	Gene	logFC CBP20	logFC HPR1	logFC EDC1	logFC NOT4	logFC PAT1	logFC POP2	logFC RRP47	logFC RRP6	logFC TRF5	logFC XRN1
YAL068C	PAU8	-0.342129	-1.44755	-0.497828	0.81339	1.97914	-0.346173	0.801625	1.44878	-0.117111	1.2941
YAL067W-A	YAL067W-A	-0.64945	-0.998475	0.301455	-0.0592372	-0.118662	-0.470109	-0.383875	-0.0941334	-0.560198	-1.49396
YAL067C	SEO1	-0.356149	-1.39411	0.354998	0.0799126	1.41007	0.141021	1.85925	0.718509	0.0483253	0.113374
YAL065C	YAL065C	0.1317	-1.03994	0.250827	-0.369396	-0.0791635	-0.700761	0.518576	0.498999	-0.430675	-1.02915
YAL064W-B	YAL064W-B	0.261482	-0.88888	0.199055	-0.480753	0.251378	-0.283792	1.00581	0.640145	-0.385279	-0.756584
YAL064W	YAL064W	-0.557383	-0.693036	0.17501	-0.411104	0.419092	0.0129049	1.79063	2.04995	-0.370174	2.25088
YAL064C-A	YAL064C-A	-0.566601	-1.05899	0.177569	-0.450899	-0.0675807	-0.563259	-0.439495	-0.0600568	-0.514946	-1.38288
YAL063C-A	YAL063C-A	-0.794685	-2.03794	0.179407	-1.40519	1.14647	-0.203322	1.62198	2.33024	0.110171	1.42119
YAL063C	FLO9	0.891303	0.399239	0.236952	0.373913	1.13706	0.338744	1.46847	0.280793	0.538832	2.58285
YAL062W	GDH3	-0.755756	-2.46238	0.323135	-1.42389	0.922269	-0.807961	-1.28143	1.66092	-0.446732	-0.975527
YAL061W	BDH2	0.135799	1.1243	-0.650835	1.55112	2.40313	2.33722	-0.93285	0.692752	0.0949343	-0.623203
YAL060W	BDH1	0.573478	-0.365663	0.0314823	-0.731611	-0.1446	-0.789861	-0.644477	0.814605	-0.169292	0.602055
YAL059W	ECM1	-0.386275	-1.15341	0.387884	-1.96623	-0.512294	-0.353187	-0.418242	-0.394371	-0.879517	-0.623405
YAL058W	CNE1	0.0120689	-0.451634	0.171561	-1.00095	-0.0628551	-0.436952	-0.257712	0.29716	0.040764	0.177646
YAL056W	GPB2	0.0257512	0.301857	-0.152103	-0.0388771	-0.188238	-0.264191	0.243893	-0.163936	0.104499	-0.321872
YAL055W	PEX22	-0.0608693	0.312511	-0.0114505	-0.183001	0.751967	-0.242683	-0.17434	0.390848	-0.201633	-0.384932
YAL054C	ACS1	0.118079	-0.632428	0.13254	-0.130963	0.345123	0.802282	-0.459992	0.836576	-0.184922	0.439981
YAL053W	FLC2	1.32779	1.59339	0.0288536	0.725112	-0.53149	0.460379	1.13382	0.257601	1.22199	0.0999148
YAL051W	OAF1	0.477186	0.551964	0.321205	-0.0764001	-0.826796	0.0788136	0.273976	-0.0152901	0.273044	0.0552701
YAL049C	AIM2	-0.0161591	-0.0967837	0.33338	-1.05441	-0.140239	-0.672907	-0.374322	-0.259053	-0.290143	-0.4623
YAL048C	GEM1	0.620289	-0.245923	-0.32698	0.14926	0.294307	-0.256837	0.452502	-0.233758	0.194059	0.4164
YAL047C	SPC72	-0.421634	0.0845716	-0.226356	-0.0812096	0.0795974	-0.35145	-0.122392	-0.192645	-0.0508102	-0.118785
YAL046C	AIM1	-0.673832	-0.938214	0.439508	-0.516997	0.335438	-0.0107798	-0.948717	-0.119722	-0.830872	-0.429906
YAL044W-A	YAL044W-A	-0.40177	-0.998606	0.539728	-0.324107	0.345285	-0.298342	-0.636182	0.162029	-0.598317	-0.448056
YAL044C	GCV3	-0.826688	-0.826232	0.509179	-0.506943	-0.145257	-1.1058	-0.428312	-0.381328	-0.776305	-0.584508
YAL043C	PTA1	0.0754254	-0.0508578	-0.247591	0.225459	-0.0101757	0.133675	-0.200004	0.00623397	-0.0838896	-0.383625
YAL042W	ERV46	-0.0466449	-0.0713175	-0.0217061	-1.01826	0.00501309	-0.447787	-0.313519	-0.23013	-0.0981906	-0.851215
YAL041W	CDC24	-0.0384419	-0.021255	-0.0255117	0.199606	-0.677761	-0.241213	0.152334	-0.435432	0.198941	-0.518643
YAL040C	CLN3	0.725523	0.440092	-0.51038	0.713274	-1.08108	-0.00902239	-0.265679	0.126838	-0.0789889	0.704719
YAL039C	CYC3	0.50084	-0.162765	0.499973	0.662578	0.0425535	0.743064	-0.399226	0.324641	-0.371381	-0.0157041
YAL038W	CDC19	-0.481801	-1.25081	0.481373	-0.822658	0.145879	-0.311898	-0.530862	-0.520255	-0.42529	-1.52253
YAL037W	YAL037W	-0.322093	-1.37252	0.404168	-0.33415	1.27821	0.154415	0.0570682	0.874701	-0.488991	1.44293
YAL037C-A	YAL037C-A	-0.714067	-1.08512	0.316965	-0.169577	0.440298	-0.428633	-0.633584	0.276337	-0.593863	-1.27759
YAL036C	RBG1	-0.613753	-0.770796	0.10504	-0.922904	-0.0535626	-0.972035	-0.359905	-0.141737	-0.588432	-0.0944523
YAL035W	FUN12	0.138094	-0.370426	-0.0466476	-0.496224	-0.602536	-0.00516627	0.123812	-0.939134	0.126434	-1.31485
YAL034W-A	MTW1	-0.0551947	0.58424	0.0780135	0.258692	0.224092	0.50995	-0.506966	-0.384552	-0.488968	0.207314
YAL034C	FUN19	-0.0978905	0.297605	-0.319641	0.574455	0.305052	0.389393	0.0709452	0.0891471	0.127005	0.364312
YAL033W	POP5	-0.510224	-0.794356	0.189643	0.0696311	0.258768	-0.381045	-0.223246	0.157691	-0.991336	-0.651456
YAL032C	PRP45	-0.0944678	-0.286627	0.296188	-0.471541	-0.245118	1.03548	-0.328994	-0.0629084	-0.10688	-0.108396
YAL031C	GIP4	0.0425478	0.25147	-0.168429	-0.0506304	-0.396322	-0.0200744	0.363088	-0.264798	0.216218	0.179544
YAL030W	SNC1	-1.59567	-0.452721	0.168869	0.0327263	0.523231	-0.15055	-0.974374	0.207936	-0.746899	-0.926201
YAL029C	MYO4	0.355597	0.154212	-0.0304185	-0.302364	-0.467169	-0.677018	0.121207	-0.45374	0.218159	-0.738572
YAL028W	FRT2	-0.141872	0.61806	0.32365	0.145887	0.857281	0.0983002	-0.161333	1.08908	-0.165636	1.50167
YAL027W	SAW1	-0.830067	-0.289009	0.100657	-0.45537	0.585321	0.15088	-0.252461	0.267051	-0.776107	0.299757
YAL026C	DRS2	0.645986	0.243881	-0.368313	-0.553235	-0.198337	-0.475518	0.768334	-0.508396	0.771459	-0.931755
YAL025C	MAK16	-0.311565	-0.0382281	-0.478795	-0.951276	-0.326332	-0.267718	-0.091598	-0.649003	-0.599787	-0.306157
YAL024C	LTE1	0.185917	0.130691	-0.393458	-0.29065	-0.320549	-0.338281	-0.0444101	-0.433765	0.00241614	-1.24993
YAL023C	PMT2	0.654232	0.428389	-0.22215	-1.25704	-0.664164	-0.646986	0.539263	-0.630739	0.824229	-0.995852
YAL022C	FUN26	0.293272	0.206104	-0.173115	-0.259826	-0.406329	-0.168976	0.098549	0.230586	0.274308	-0.0189668
YAL021C	CCR4	0.8267	0.0282758	-0.0569951	-0.629183	-0.760642	0.189493	0.245318	-0.405232	0.426002	-0.80277
YAL020C	ATS1	-0.209046	-1.02104	-0.194614	-0.865245	0.122627	-0.208968	-0.660442	-0.355754	-0.741029	0.104198
YAL019W	FUN30	-0.355128	-0.111394	-0.00792175	-0.310365	-0.329273	-0.655446	0.294016	-0.817499	0.342765	-0.649896
YAL018C	YAL018C	-0.422467	-1.02628	0.349628	-0.201069	-0.0405048	-0.404745	-0.48825	0.0230683	-0.575127	-1.35078
YAL017W	PSK1	0.622917	1.15399	0.353673	0.338269	-0.184601	0.303998	0.48436	0.167184	0.530276	-0.315417
YAL016W	TPD3	0.0978599	0.0700984	-0.234981	0.397867	-0.182816	0.0587802	-0.0719279	-0.632281	0.252127	-1.20071
YAL016C-B	YAL016C-B	0.120749	0.730099	0.38953	-0.446929	0.432177	0.741222	-0.791707	-0.29512	0.803153	-0.562082
YAL015C	NTG1	-0.72003	-0.656293	0.126789	-0.732561	0.614541	-0.43446	-0.464347	0.535337	-0.646466	0.740492
YAL014C	SYN8	-0.0892257	-0.479204	0.140069	-0.440093	0.166604	-0.554546	-0.16103	0.16616	-0.329921	0.852713
YAL013W	DEP1	0.340623	0.015823	-0.06478	0.0188327	-0.391518	0.175411	-0.424403	-0.288785	-0.214222	-0.148358
YAL012W	CYS3	-0.363685	-0.688785	-0.0455727	-0.499044	-0.80145	-0.408322	-0.394865	-0.646427	-0.200634	-1.63726
YAL011W	SWC3	0.180393	-0.163131	-0.285643	-0.480744	0.0573822	0.106943	-0.202874	-0.226204	-0.0638068	-0.72062
YAL010C	MDM10	0.0259436	0.0850724	-0.114224	0.524236	0.288987	0.0446472	0.118708	-0.0272322	0.0849355	-0.0771832
YAL009W	SPO7	-0.258834	-0.673056	-0.0344485	-0.26024	0.503104	-0.19005	-0.766949	0.0929201	-0.57538	0.00304175
YAL008W	FUN14	0.387163	0.217538	0.346889	-0.462035	1.20214	0.474094	-0.0504468	-0.0150353	0.0161067	-0.690379
YAL007C	ERP2	-0.25062	-0.71987	-0.22846	-1.35016	0.0301622	-0.598086	-0.98257	-0.594301	-0.593481	-1.44161
YAL005C	SSA1	-0.0841459	0.32409	0.500988	0.233906	0.126461	0.351552	0.304632	-0.22555	0.15924	-1.00992
YAL003W	EFB1	-0.746939	-1.2973	0.177643	-1.11002	-0.0432484	-0.577534	-0.78078	-0.595254	-0.845935	-1.49835
YAL002W	VPS8	0.29995	0.354742	-0.12517	-0.147327	0.251455	-0.401139	0.25356	0.0704935	0.21189	0.0651318
YAL001C	TFC3	0.00980191	0.107676	-0.291088	0.362598	0.205496	-0.0255124	0.104796	-0.403556	0.359125	-0.703237
YAR002C-A	ERP1	-0.401448	-0.792321	-0.0874797	-1.23176	0.0318374	-1.10371	-0.54749	-0.230614	-0.479102	-1.06042
YAR002W	NUP60	0.185662	0.160558	-0.0147713	-0.114914	-0.273542	0.297818	0.183288	-0.222482	0.15676	-0.576936
YAR003W	SWD1	-0.130485	-0.322288	-0.299857	-0.71416	0.557991	0.00635911	0.0735654	0.758762	-0.602071	0.738363
YAR007C	RFA1	0.0815271	0.372872	-0.346031	0.264651	-0.589956	-0.178533	-0.15442	-1.01164	0.178126	-0.534428
YAR008W	SEN34	-0.0201985	-0.53139	-0.119798	-0.174374	0.0733309	0.137248	-0.530565	-0.379366	-0.321897	-0.345545
YAR009C	YAR009C	-2.37456	0.0353442	-0.0630556	0.639266	-1.82613	-0.861265	0.462369	-0.0023904	0.145652	-1.00663
YAR010C	YAR010C	-0.894747	-0.0305535	0.0434157	0.0291481	-1.43448	0.678116	0.458259	0.167026	0.255607	-0.718315
YAR014C	BUD14	0.0507723	0.0481467	0.316034	-0.0704885	-0.591654	-0.242865	0.0820952	-0.365975	-0.0458642	0.0116891
YAR015W	ADE1	-1.28894	-0.746377	0.111058	-0.30575	-0.881821	-0.899027	-0.882024	-0.446014	-1.01051	-0.363137
YAR018C	KIN3	-0.122493	0.334766	-0.214907	0.501071	-0.21925	0.213761	-0.653329	0.232371	-0.470841	0.629622
YAR019C	CDC15	-0.0461319	0.0842928	-0.157681	-0.080157	-0.261336	-0.0421869	0.170018	-0.275657	0.266782	-0.501444
YAR020C	PAU7	-0.403914	-0.0665441	-0.28878	1.32416	1.55399	0.272971	0.138083	0.243766	-0.44987	2.29399
YAR023C	YAR023C	0.0697815	-0.827457	-0.223033	-0.265478	0.590032	-0.570265	-0.0194051	0.152606	0.177978	1.81589
YAR027W	UIP3	0.31774	0.388699	-0.0506902	0.635048	0.283486	-0.0531666	-0.0218531	0.408335	0.1122	0.200941
YAR028W	YAR028W	0.304122	-0.797627	0.138912	-0.59475	0.0949782	-0.159859	-0.67332	-0.19174	-0.40518	0.433377
YAR029W	YAR029W	0.488335	0.841758	-0.234892	-0.69513	0.470213	-1.09038	0.899695	-0.0958367	0.347215	1.4928
YAR031W	PRM9	0.00598552	-1.08971	0.0819877	-3.47495	0.511145	-1.24654	-1.54824	-0.588582	-0.789148	-0.966297
YAR033W	MST28	-0.0882265	-0.359059	-0.0619771	-1.41366	0.442394	-0.480217	-0.360503	-0.147956	-0.0586746	0.415586
YAR035C-A	YAR035C-A	-0.00402168	-0.975612	0.279627	-0.17111	-0.390259	0.499814	-0.449437	0.543371	-0.199479	-0.2864
YAR035W	YAT1	0.1791	-0.845714	0.409409	1.22111	0.198355	0.633626	0.375599	0.755468	-0.0833747	0.0331106
YAR042W	SWH1	0.342458	0.169438	-0.0170363	0.532703	-0.314153	0.0910867	0.287928	-0.263405	0.296043	-0.271246
YAR050W	FLO1	0.161555	0.154296	-0.147717	0.272708	0.561296	-0.601844	2.43989	0.42584	0.210801	1.2407
YAR064W	YAR064W	-0.316566	-0.830618	0.149551	-0.48171	-0.181962	-0.302801	0.664863	0.683162	-0.173323	-0.562274
YAR066W	YAR066W	-1.00132	-2.55061	-0.798352	-1.55227	-0.312241	1.12607	-0.140932	-0.363885	-1.31363	-0.256104
YAR068W	YAR068W	-1.26141	-3.36826	-0.198998	-2.80742	-0.698458	0.187744	0.226583	-0.818596	-0.773199	0.0169593
YAR071W	PHO11	1.3364	-0.450236	1.74278	-2.03324	-0.81213	-0.0490159	0.482935	0.397912	0.620124	0.502616
YAR073W	IMD1	-0.0121982	-4.37707	-0.95021	-1.29866	-0.995809	0.695218	0.0162302	0.244657	-1.044	-1.63223
YAR075W	YAR075W	-0.303724	-1.0106	0.0639528	-0.781893	-0.287972	-0.582441	0.274039	0.720844	-0.313882	-1.02408
YBL113C	YBL113C	-0.00627896	-0.982195	0.019435	-0.00183817	0.40008	0.322172	0.309287	0.555729	-0.14538	0.44113
YBL112C	YBL112C	0.823964	-1.01942	-1.38265	0.619232	0.758697	1.31853	0.317038	0.915578	-0.52827	-0.141697
YBL111C	YBL111C	0.00392407	-1.40228	-0.175468	0.173499	-0.00200213	1.38429	0.434499	1.45692	-0.634299	1.20574
YBL108C-A	PAU9	-1.42266	-1.15174	0.000701006	0.0040884	0.952567	-0.437642	-0.828233	-0.0230357	-0.535596	-0.106554
YBL107C	YBL107C	-0.456044	-0.465508	0.624923	0.850642	1.76692	0.600953	-0.0942435	0.509566	-0.484279	0.569926
YBL106C	SRO77	0.0988534	-1.09898	0.077066	0.675232	1.0809	-1.38787	-0.162396	-0.6546	-0.127238	0.255048
YBL105C	PKC1	0.130485	0.491508	0.0695309	0.745817	0.902692	-0.347105	0.326392	-0.443537	0.490231	-0.432903
YBL104C	YBL104C	0.101635	-0.253812	0.040322	0.47265	0.430501	-0.18884	-0.0849236	-0.150071	0.0144227	-0.465126
YBL103C	RTG3	0.0315921	0.383638	0.087967	0.987282	1.24153	-0.340761	0.0696824	-0.0115052	0.0329662	0.307394
YBL102W	SFT2	-0.269392	-0.341894	0.241193	0.391384	1.56331	-0.222839	-0.60429	0.234996	-0.693451	-0.170027
YBL101C	ECM21	0.50855	0.598845	0.0834011	1.48489	0.755563	-0.011145	0.468121	0.105851	0.584102	-0.281547
YBL099W	ATP1	0.0257241	-0.523011	0.0554943	-0.26099	0.484989	0.284294	-0.428942	-0.667856	0.0339137	-0.80092
YBL098W	BNA4	-1.1136	-2.19562	-0.0422757	-0.460658	1.12058	-1.25794	-0.399088	0.278348	-0.282065	-0.43067
YBL097W	BRN1	-0.209452	0.0114657	0.0672569	-0.463101	0.0847014	-0.132509	-0.218266	-0.391494	0.192028	-0.0159719
YBL095W	YBL095W	0.244475	-0.240386	-0.0408119	-0.0918464	-0.205458	-0.59997	-0.0585855	-0.43306	0.445726	0.382667
YBL093C	ROX3	-0.263667	-0.605022	0.063162	0.501213	0.885813	-0.329323	-0.354572	0.0986348	-0.561449	-0.290828
YBL092W	RPL32	-0.871409	-1.28822	0.464137	-0.665378	0.199325	-0.348233	-0.685548	-0.489684	-0.563316	-1.4726
YBL091C-A	SCS22	-1.94284	-1.24736	0.424458	1.0957	2.29688	0.381021	-0.842355	0.167976	-0.433518	0.105437
YBL091C	MAP2	-0.133552	-0.717787	-0.193765	0.32832	0.94472	-0.565288	-0.872153	-0.540314	-0.393181	-1.04774
YBL090W	MRP21	-0.141545	-0.17961	0.493252	0.713997	1.68956	0.678741	-0.766958	-0.342613	-0.647908	-0.107256
YBL089W	AVT5	-0.341489	-0.215798	-0.106114	0.52141	1.01071	0.221314	0.175469	0.0612333	0.0943255	0.622894
YBL088C	TEL1	0.202979	-0.255907	-0.242107	0.402866	0.951295	-0.373914	0.675845	-0.288939	0.280952	0.574869
YBL087C	RPL23A	-0.682517	-1.37759	0.268126	-0.728646	0.33466	-0.596028	-0.816844	-0.47475	-0.686273	-1.43414
YBL086C	YBL086C	0.26538	0.653545	0.192563	0.777288	0.953218	0.631582	-0.0268435	-0.428881	0.0592041	0.221896
YBL085W	BOI1	0.154286	0.185657	-0.321984	0.508347	0.146047	-0.481117	0.354162	-0.665218	0.460494	-1.3484
YBL084C	CDC27	0.380906	0.15598	-0.0336813	0.958517	0.750061	0.0524542	0.329917	-0.481871	0.325798	-0.949416
YBL082C	ALG3	-0.173237	-0.29239	-0.177177	-0.385361	1.06031	-0.559033	-0.125344	-0.179612	-0.00559439	0.0683995
YBL081W	YBL081W	0.491439	0.150316	-0.248504	0.202458	-0.610585	-0.531566	0.169631	-1.13699	0.0113207	-0.259086
YBL080C	PET112	-0.43662	-0.0146647	0.15734	1.19255	1.23032	1.35528	-0.256065	0.209177	0.0276032	-0.41977
YBL079W	NUP170	-0.129597	0.0863287	-0.153816	0.467794	0.477277	-0.736805	0.402004	-0.49273	0.38173	-0.932327
YBL078C	ATG8	-0.38905	0.770254	0.241885	2.41444	1.67767	0.635474	-0.490643	1.13117	-0.392803	0.593024
YBL076C	ILS1	0.0898618	-0.178928	-0.0393172	-0.38098	-0.0152696	-0.788287	0.115761	-0.854951	0.180302	-1.39341
YBL075C	SSA3	-0.264424	0.647013	-0.416875	2.19557	1.04654	-0.0371427	0.651526	-0.00227908	0.330602	1.1983
YBL074C	AAR2	-0.0991904	-0.323519	-0.0108434	1.07352	0.216843	-0.212713	0.798518	0.0807521	-0.166575	-0.727113
YBL072C	RPS8A	-0.854001	-1.23261	0.389894	-0.671982	0.17018	-0.34524	-0.724116	-0.414353	-0.637381	-1.4563
YBL071W-A	KTI11	-0.764495	-0.976044	0.00890472	-0.0352606	1.05223	-0.438705	-0.153129	0.0997414	-0.69083	0.34537
YBL071C-B	YBL071C-B	-0.599238	-1.5116	-0.135832	0.76725	0.887406	-0.521174	-0.55415	-0.0930756	-0.853945	-0.323385
YBL069W	AST1	-0.0950325	-0.573244	0.174645	0.726124	0.551819	0.19133	-0.481273	-0.494756	-0.047818	-0.428673
YBL068W	PRS4	-0.299426	-0.737644	-0.188379	0.0706537	0.48486	-0.818612	-0.340549	-0.416243	-0.288226	-0.767089
YBL067C	UBP13	-0.164423	0.0653237	-0.408134	0.497815	0.760015	-0.602027	0.149333	-0.621909	0.605082	-1.37315
YBL066C	SEF1	1.12772	0.872586	0.0991527	0.941439	-0.542345	1.0153	-0.189123	-0.974565	0.96131	-1.95294
YBL064C	PRX1	0.290554	0.258969	0.105171	1.88908	1.55285	0.798415	0.428241	0.77881	0.00233826	-0.401565
YBL063W	KIP1	-0.0905299	0.176861	-0.346476	0.560351	0.78812	0.0815939	-0.0565614	-0.714542	0.120935	-0.743028
YBL061C	SKT5	-0.287363	-0.0434757	0.341665	0.670148	0.354618	0.055149	0.273287	0.258584	-0.0984017	0.45004
YBL060W	YEL1	0.0742111	0.527392	0.133045	0.887991	1.00699	0.000855786	0.574583	-0.132318	0.33931	1.21169
YBL059W	YBL059W	-0.343086	-0.301576	0.0760906	1.7252	1.78412	0.734297	-0.489748	0.420517	-0.448159	0.279298
YBL059C-A	CMC2	-1.17801	-0.924514	0.0472473	0.786582	1.72191	-0.0781577	-1.31354	-0.179703	-1.06129	-0.265381
YBL058W	SHP1	-0.424321	-0.138099	-0.0414979	0.604634	0.600511	-0.174307	-0.327787	-0.27208	-0.09219	-0.679341
YBL057C	PTH2	-0.770567	-1.00086	-0.392159	-0.491819	0.779933	-1.06447	-0.930133	-0.356338	-0.993854	-0.721498
YBL056W	PTC3	-0.0957526	-0.338546	-0.22808	0.257512	1.27133	-0.389148	-0.500013	-0.287492	-0.165852	-0.0572056
YBL055C	YBL055C	-0.231795	-0.898675	0.0304557	0.170879	0.880074	-0.86116	-0.32849	-0.277314	-0.564539	-0.212906
YBL054W	TOD6	-0.0205661	-0.202478	0.158808	-0.14957	-0.00493322	-0.529037	0.399002	-0.441773	-0.0548424	-0.0696436
YBL052C	SAS3	-0.302048	0.0421528	0.0499356	0.0848524	0.332191	-0.370368	0.278095	-0.343219	-0.00308961	0.15296
YBL051C	PIN4	0.39856	0.0575704	-0.210996	0.786698	1.00294	0.156065	-0.240878	-0.631092	-0.268669	0.303306
YBL050W	SEC17	-0.455239	-0.467128	0.444901	0.594017	0.908234	0.229723	-0.706609	0.237644	-0.626358	-0.352325
YBL049W	MOH1	-0.138522	-0.0134672	-0.00390078	3.54477	1.6725	1.14733	-0.530238	0.546768	-0.312553	0.0839336
YBL047C	EDE1	0.918982	0.758538	-0.150035	0.912328	0.55807	0.11499	0.577604	-0.359164	1.03613	-0.802224
YBL046W	PSY4	-0.268804	0.688761	-0.101271	1.27704	0.650273	0.33836	-0.416271	-0.0834135	-0.321857	0.128714
YBL045C	COR1	0.867088	0.0835843	-0.339805	0.486857	0.482474	1.03611	-0.402117	-1.1746	0.371936	-0.038679
YBL044W	YBL044W	-0.95251	-0.843715	0.333436	-0.381947	1.76039	-0.610822	-0.728433	-0.115938	-0.584589	-0.613737
YBL043W	ECM13	-0.667915	-0.430575	-0.0595717	5.84394	1.25479	2.80296	0.0352083	0.0484721	-0.394391	0.788724
YBL042C	FUI1	0.662646	0.759565	0.281869	0.852894	0.879706	0.573116	1.00904	0.0402963	0.494731	2.41755
YBL041W	PRE7	-0.381567	-0.257658	0.165507	0.552464	0.742611	-0.788074	-0.154636	0.0709246	-0.129119	-0.463144
YBL040C	ERD2	-0.458375	-0.5048	0.010149	0.188233	1.30133	-0.75916	-0.428253	0.133334	-0.427846	0.120258
YBL039C	URA7	0.0767341	-0.63393	0.0128827	-0.384678	0.303277	-0.646479	0.0772844	-0.666226	0.0078376	-1.24569
YBL038W	MRPL16	-0.523543	0.145826	0.361737	1.32949	0.991018	0.934052	-0.592039	-0.0382054	-0.355483	0.0273512
YBL037W	APL3	0.319422	0.252548	-0.123118	1.26868	0.631202	0.242553	0.253937	-0.663388	0.320079	-0.336782
YBL036C	YBL036C	-0.287027	-0.555035	-0.212714	0.272568	1.18292	-0.890815	-0.262923	-0.205975	-0.537347	-0.761437
YBL035C	POL12	0.135168	-0.219143	-0.422305	1.55247	0.712671	-0.0490394	-0.187933	-0.733308	0.120241	-0.518211
YBL034C	STU1	0.148214	0.206284	-0.281498	0.835038	0.490943	-0.0357079	0.354752	-0.209457	0.491266	-1.41334
YBL033C	RIB1	0.1155	-0.210555	0.171689	0.935836	0.799714	0.294491	0.0637232	-0.0252902	0.0489129	-0.38616
YBL032W	HEK2	-0.782872	-1.08766	-0.170967	-0.383983	0.76317	-0.701911	-0.95692	-0.583823	-0.595237	-1.0481
YBL031W	SHE1	-0.323756	0.0501674	0.0673546	0.328057	0.717276	-0.278329	-0.487538	-0.215311	-0.762869	0.623153
YBL030C	PET9	0.680094	0.0810254	0.197926	0.0733735	0.473992	0.433864	0.0902839	-0.675874	0.641358	-0.265407
YBL029W	YBL029W	-0.52091	-1.0118	-0.879376	-0.16966	-1.32641	-1.20757	-0.187393	0.389063	-0.981418	-0.11262
YBL029C-A	YBL029C-A	-0.219655	-0.0824395	-0.103529	1.42042	1.02839	0.439138	-0.69056	0.397775	-0.503524	0.247308
YBL028C	YBL028C	-0.332671	-0.95202	0.159643	-0.385117	0.623991	-0.364031	-0.484914	-0.573575	-0.852613	-0.745547
YBL027W	RPL19B	-1.02953	-1.24778	0.40592	-0.641653	0.18975	-0.331268	-0.708281	-0.31589	-0.729281	-1.38316
YBL026W	LSM2	-0.695472	-0.828861	0.118127	0.0508703	0.75981	-0.521433	-0.737199	-0.247645	-0.850566	-0.826542
YBL025W	RRN10	-0.870802	-1.01993	-0.328799	-0.0760132	1.40191	-0.55179	-0.83608	-0.380418	-1.00743	1.60562
YBL024W	NCL1	0.104	-0.58842	-0.177814	-0.206996	0.732607	-0.477508	-0.34521	-1.22576	-0.111607	-0.390022
YBL023C	MCM2	0.490474	0.415234	-0.578941	0.76417	0.407558	0.39925	0.478241	-0.598758	0.598646	-1.0615
YBL022C	PIM1	0.214411	0.25511	0.00611578	0.469012	0.689954	-0.0526837	0.326441	-0.305447	0.596196	-1.00333
YBL021C	HAP3	0.29349	-0.145068	0.409339	0.653535	1.25708	0.640161	-0.702064	-0.196249	-0.71847	0.402005
YBL020W	RFT1	0.32132	0.231414	-0.247816	-0.183897	1.21222	-0.397773	0.425052	-0.0441476	0.377384	-0.147368
YBL019W	APN2	-0.378943	-0.35436	-0.104192	0.763674	1.53113	0.184498	-0.294248	0.333163	-0.195156	0.999442
YBL018C	POP8	-1.109	-1.39479	0.144688	-0.280973	0.504556	-0.987595	-0.896924	-0.5494	-0.94315	-0.822875
YBL017C	PEP1	0.945065	0.835626	-0.0606969	0.0460089	0.218937	-0.404284	0.666543	-0.484275	0.846997	0.132343
YBL016W	FUS3	-0.110507	-0.422917	0.0343856	0.661799	-0.624257	-0.120227	0.111003	0.185139	-0.391441	0.0955659
YBL015W	ACH1	1.04521	0.164162	-0.30509	1.76287	0.650174	1.12355	-0.258922	0.373134	0.260747	0.404072
YBL014C	RRN6	-0.1007	0.0562509	0.275244	-0.00500809	0.430461	-0.244992	0.509075	-0.201521	-0.0562709	0.000930876
YBL013W	FMT1	-0.160915	-0.692545	0.125201	-0.507179	-0.099862	-0.557429	-0.404998	-0.303705	-0.288497	-1.34855
YBL011W	SCT1	0.193246	-0.0187578	-0.122145	-0.0168868	0.522175	-0.41419	0.260132	-0.165036	0.198669	-1.06296
YBL010C	YBL010C	-0.145172	0.0394226	0.283556	0.989527	0.982238	0.400621	-0.531001	-0.0710152	-0.596377	1.07513
YBL009W	ALK2	-0.0214899	0.174621	-0.394808	0.131315	0.774821	-0.485398	-0.0131801	-0.825562	0.0734453	-0.624961
YBL008W-A	YBL008W-A	-0.481574	-0.87215	0.311685	-0.0468941	0.161016	-0.0485492	0.649106	0.833478	-0.625727	-1.28281
YBL008W	HIR1	-0.446459	0.202177	0.191404	0.407164	1.09523	-0.136042	0.231066	-0.00190433	0.331448	-0.335071
YBL007C	SLA1	0.329459	0.468115	-0.0894296	0.54314	0.684882	0.169716	0.432756	-0.777045	0.724917	-0.908898
YBL006C	LDB7	-0.263109	-1.05327	0.0881593	0.50097	1.84969	-0.375417	-0.944468	-0.105682	-0.962173	-0.181994
YBL005W-A	YBL005W-A	-0.295858	1.13232	0.108961	1.25291	-0.953045	1.19297	0.842036	0.122023	0.0970991	0.663445
YBL005W	PDR3	0.178115	-0.159036	-0.166144	-0.0831758	1.83339	-1.1343	-0.0921052	-0.175195	0.125074	-0.565767
YBL004W	UTP20	0.0186568	-0.238358	-0.162841	-0.169012	0.0933356	-0.0343952	0.583369	-0.841391	0.310299	-1.50524
YBL003C	HTA2	-0.766873	-1.24034	0.0483187	-0.570249	0.293634	-0.463584	-0.859204	-0.701316	-0.675217	-1.49417
YBL002W	HTB2	-0.841003	-1.02832	-0.238683	-0.474471	0.318846	-0.636647	-0.667285	-0.64127	-0.497468	-1.32487
YBL001C	ECM15	-0.365895	-0.900373	0.154273	0.575728	1.20555	-0.257046	-0.71306	0.19214	-0.680678	-1.34991
YBR001C	NTH2	0.629292	1.15835	0.0401298	2.20693	1.31203	0.757186	0.450979	0.0288694	0.634297	-0.0584459
YBR002C	RER2	0.00148716	-0.284904	0.239037	0.169238	0.957426	0.0736806	-0.177138	-0.0707344	-0.455236	-0.16558
YBR003W	COQ1	-0.00540027	-0.148503	0.0675773	0.79614	1.22424	0.49098	-0.422826	0.189865	0.0576183	-0.38347
YBR004C	GPI18	0.293053	0.227755	-0.217821	0.692134	0.981213	-0.301251	0.397015	-0.0200167	0.279214	0.33677
YBR005W	RCR1	-0.00897884	-0.0496181	-0.166845	1.18947	1.25754	0.12302	-0.584048	0.827102	-0.700514	-0.222339
YBR006W	UGA2	0.644002	0.803597	0.0871756	1.83216	2.01791	0.205031	-0.276228	0.507558	0.166968	0.570928
YBR007C	DSF2	0.262944	0.606545	-0.182554	1.06149	0.842717	0.0163681	0.289759	-0.232969	0.415909	-0.430942
YBR008C	FLR1	0.00365076	-0.609627	0.42634	0.0203057	1.18618	-1.03694	1.89825	-0.390577	0.65011	1.05696
YBR009C	HHF1	-0.964692	-1.10921	0.18048	-0.556324	0.0418774	-0.257444	-0.804521	-0.621686	-0.675217	-1.28655
YBR010W	HHT1	-1.75552	-1.0482	0.200084	-0.234623	0.00268287	-0.140983	-0.902437	-0.122668	-0.768931	-1.27231
YBR011C	IPP1	-0.490923	-0.918194	0.330228	-0.587638	0.417589	-0.827887	-0.502315	-0.340745	-0.416923	-1.49644
YBR013C	YBR013C	-0.100049	-0.266564	0.70797	1.22274	1.87232	0.540497	0.175079	1.57833	-0.057149	-0.0361898
YBR014C	GRX7	0.013201	0.00126654	-0.000478815	0.391049	0.735966	-0.35171	-0.1936	-0.00715572	-0.226863	-0.79538
YBR015C	MNN2	0.587882	0.426583	-0.0448697	-0.21241	0.272627	-0.177789	0.531874	-0.285522	0.564946	-0.57864
YBR016W	YBR016W	-0.199105	-0.413321	0.0375999	0.906868	1.86317	-0.0216194	-0.478551	0.0388927	-0.750408	-0.146748
YBR017C	KAP104	0.372271	0.377469	-0.224953	0.778798	0.40404	-0.367555	0.45351	-0.515846	0.408049	-0.238261
YBR018C	GAL7	-0.103464	-0.372687	0.0109368	0.0907738	2.41829	-0.499718	-0.277308	-0.202145	-0.114428	1.42461
YBR019C	GAL10	-0.683703	-0.836019	0.372799	-0.177412	2.03834	-0.0994641	0.260478	-0.0854032	-0.559731	-0.384766
YBR020W	GAL1	0.051959	0.198741	-0.016295	0.934431	1.33655	-0.379702	0.606866	0.290827	0.18111	1.51924
YBR021W	FUR4	1.76644	1.34956	-0.109939	0.390397	1.07424	-0.340626	1.21609	-0.157443	0.973429	0.635365
YBR022W	POA1	-0.831076	-1.55618	0.106369	0.936446	1.72388	0.581649	-0.84716	0.0334233	-0.967019	-0.00817279
YBR023C	CHS3	0.266636	0.346003	-0.0549331	0.589147	0.258619	-0.154442	0.685071	-0.26472	0.717574	-0.793015
YBR024W	SCO2	0.62605	0.547351	0.294386	0.892336	2.33646	0.0121743	-0.481887	0.204389	0.152889	0.635965
YBR025C	OLA1	-0.49928	-1.12277	-0.126031	-0.544683	0.0845948	-0.825338	-0.571237	-0.380299	-0.627084	-1.54859
YBR026C	ETR1	-0.314889	-0.40772	-0.219883	0.934231	1.32042	-0.00432493	-0.619809	0.000398232	-0.0829458	-1.17045
YBR028C	YPK3	-0.335251	-0.527084	-0.156238	-0.0909849	0.398436	-0.0738077	-0.325528	-0.430775	-0.00838752	-0.257371
YBR029C	CDS1	0.671777	0.262639	0.0304761	0.0639414	0.934812	0.110118	0.20561	-0.476356	0.32698	-0.119841
YBR030W	RKM3	-0.56969	-0.198077	-0.0596989	0.17535	0.27573	-0.340557	-0.419065	-0.490586	-0.258802	0.796567
YBR031W	RPL4A	-0.574118	-1.15575	0.476512	-0.841356	0.153962	-0.207985	-0.577052	-0.381442	-0.512988	-1.2617
YBR033W	EDS1	-0.358231	0.0952344	0.333047	2.40154	2.00134	2.04141	-1.03475	0.334107	-0.39614	0.749007
YBR034C	HMT1	-0.225791	-0.82332	0.131215	-0.363297	0.484265	-0.210331	-0.264821	-0.38447	-0.274088	-0.810929
YBR035C	PDX3	-0.469849	-0.783097	-0.0725937	0.73789	1.26808	-0.383115	-0.98155	-0.0606447	-0.518617	-1.00392
YBR036C	CSG2	0.598358	0.694807	-0.23721	0.510392	1.00357	0.0513285	0.110562	-0.142108	0.267779	0.0442561
YBR037C	SCO1	-0.323539	0.0768582	0.0321918	0.356058	2.05683	0.703017	-0.853693	-0.0164221	-0.520935	-0.169397
YBR038W	CHS2	0.750445	1.29842	-0.305524	0.84893	0.254539	-0.0131911	0.595843	-0.891999	0.863888	-1.05292
YBR039W	ATP3	0.281211	-0.378749	-0.0738049	0.428191	0.700229	0.811325	-0.66316	-0.357281	-0.0759577	-0.898174
YBR040W	FIG1	-1.47104	-1.21009	-0.168164	3.44614	0.0973836	-0.927176	0.36756	-0.0132328	-0.393597	-1.68874
YBR041W	FAT1	0.898035	0.84548	-0.125475	-0.265669	0.3914	-0.120673	0.780062	-0.750154	0.93138	-1.45638
YBR042C	CST26	-0.41739	-0.390061	-0.0958986	-0.360483	1.04669	-0.642152	-0.295137	-0.244691	-0.491607	-0.440318
YBR043C	QDR3	-0.0400578	0.542898	-0.00502048	0.747836	1.37286	-0.702946	0.558134	0.390519	0.215851	1.66377
YBR044C	TCM62	0.266516	0.00109917	0.252853	0.458127	1.30266	0.310227	-0.07686	0.330315	0.189734	0.0870859
YBR045C	GIP1	-0.0736042	-0.106308	-0.633489	0.215539	2.36486	-0.269217	0.478482	-0.0103024	-0.103586	0.742286
YBR046C	ZTA1	0.0871496	0.314065	0.730056	1.23425	1.23028	0.313334	-0.741222	0.751391	0.00971179	-0.377085
YBR047W	FMP23	-0.223563	-0.443638	1.03784	0.424166	1.92304	-0.483795	-0.156606	1.90971	-0.599926	0.314518
YBR048W	RPS11B	-1.14835	-1.21674	0.252732	-0.57754	-0.0138107	-0.50934	-0.664336	-0.359089	-0.473002	-1.43232
YBR049C	REB1	0.59076	0.507228	-0.155951	0.0668723	-0.183371	0.173673	0.311092	-0.753613	0.291272	-0.880484
YBR050C	REG2	0.804846	-0.394514	0.652916	0.523663	1.0091	1.44008	1.00705	0.957714	0.55508	1.38381
YBR052C	RFS1	0.00647883	0.00781041	0.253785	1.10235	1.29883	0.140194	-0.942455	-0.12071	-0.0558305	-1.02755
YBR053C	YBR053C	0.0587091	0.108719	0.106652	1.86398	1.57092	0.248074	-0.490184	0.451034	0.177279	-0.322565
YBR054W	YRO2	3.70658	0.527359	-0.217333	3.88664	0.0639248	1.2917	1.35693	0.521091	1.75799	-0.77859
YBR055C	PRP6	-0.103288	0.201655	0.0147192	0.464984	0.695475	-0.395671	0.15382	-0.285746	-0.0712023	0.700179
YBR056W	YBR056W	0.171326	0.654935	0.0278186	2.00522	1.26601	0.633175	-0.195571	1.10526	0.286528	-0.135974
YBR056W-A	YBR056W-A	-0.982498	-0.829536	-0.384236	3.67068	2.21917	1.7016	0.36357	2.71666	-1.67862	0.390104
YBR057C	MUM2	-0.969108	-0.839639	-0.153424	0.556463	0.970146	-0.722022	-0.936953	-1.20627	-0.739155	0.607295
YBR058C	UBP14	0.10198	-0.230546	-0.52164	0.974285	0.631427	-0.541513	-0.132168	-0.515397	0.139185	-0.440154
YBR058C-A	TSC3	-0.78963	-0.938774	0.134049	0.306148	0.78744	-0.759037	-0.900311	-0.304267	-0.89901	-1.1548
YBR059C	AKL1	0.367312	0.692069	0.0169998	1.73663	0.805296	0.550532	0.286383	0.0369913	0.431248	-0.589706
YBR060C	ORC2	0.0724388	-0.0419063	-0.379399	0.629221	0.831432	-0.194854	0.0846777	-0.0440181	-0.309896	-0.635593
YBR061C	TRM7	-0.178757	-0.372246	-0.0939585	0.133402	1.04129	-0.363408	-0.349911	-0.400364	-0.541304	-0.687463
YBR062C	YBR062C	-1.25681	-0.296029	0.0961066	1.16661	1.3395	-0.217747	-0.593742	0.139488	-0.45349	-0.536902
YBR063C	YBR063C	0.64037	0.689102	-0.236159	0.925481	0.952606	-0.559243	1.01797	0.162382	0.648039	0.794154
YBR065C	ECM2	0.15901	-0.313363	-0.137514	0.518153	0.163706	-0.264217	0.242776	0.227802	-0.0771992	-0.0312115
YBR066C	NRG2	-0.799956	-1.01428	0.076984	1.33177	0.922447	0.875185	-0.361916	0.981217	-0.5671	-0.288163
YBR067C	TIP1	-0.334074	-0.492507	-0.324841	0.145216	0.546218	-1.51023	-0.875528	-1.43509	-0.754814	-1.65384
YBR068C	BAP2	0.0198805	0.8823	0.0758541	0.660923	-0.486595	0.557304	0.49659	0.130028	0.240618	-0.352844
YBR069C	TAT1	0.0570546	0.616474	-0.112171	0.0994452	0.276853	0.0229888	-0.0474827	-1.1431	0.17242	-0.665803
YBR070C	ALG14	-0.516513	-0.618717	0.123377	0.663441	1.40114	-0.10263	-0.315612	0.331382	-0.275228	-0.0612072
YBR071W	YBR071W	-0.249692	0.689989	-0.0790005	1.92525	0.32367	0.840786	-0.632248	-0.0551077	-0.12917	0.186322
YBR072C-A	YBR072C-A	-0.481476	-1.11341	0.302749	-0.245902	0.327857	-0.482038	0.431857	0.136632	-0.359149	-1.24137
YBR072W	HSP26	-0.4607	-0.994971	0.219428	4.51597	3.36306	3.54646	0.290116	1.72154	1.16497	-0.200173
YBR073W	RDH54	-0.0338134	0.204275	-0.205769	0.733503	0.506324	-0.700478	0.0529998	-0.244788	0.360799	-0.585365
YBR074W	YBR074W	0.494942	0.719793	-0.292986	-0.00928061	0.48202	-0.977051	0.760383	-0.608312	0.925024	-0.242113
YBR076W	ECM8	-0.488843	0.045342	0.0725083	-0.356917	0.298372	-0.173325	-0.173444	0.292707	-0.406053	-0.6736
YBR077C	SLM4	-0.378431	-0.504184	-0.171833	1.07105	1.27731	-0.591596	-0.761665	-0.0286323	-0.501147	0.528918
YBR078W	ECM33	0.101143	-0.555356	-0.113469	-0.52384	0.384229	-0.435376	-0.165191	-0.815807	0.0995925	-1.0765
YBR079C	RPG1	0.336839	-0.0489826	0.198697	0.505367	-0.248947	-0.0301997	0.172172	-0.870536	0.170004	-0.874059
YBR080C	SEC18	-0.0397131	0.0507599	-0.194864	0.880458	0.725338	0.0640961	0.0707391	-0.470147	0.44513	-1.0149
YBR081C	SPT7	0.42581	0.295018	-0.216057	1.02761	0.898923	-0.230075	0.405552	-0.544672	0.521372	-0.793272
YBR082C	UBC4	-0.52219	-0.804839	0.162876	0.0805366	0.557027	-0.557989	-0.580575	-0.158983	-0.758506	-1.18322
YBR083W	TEC1	0.222587	0.607715	-0.221073	0.537724	-0.841503	-0.304535	-0.0794942	-0.171849	-0.218556	0.0298157
YBR084C-A	RPL19A	-1.23159	-1.12789	0.341983	-0.457508	0.126239	-0.386758	-0.75945	-0.356828	-0.746325	-1.31869
YBR084W	MIS1	0.431032	-0.0562279	0.0534641	-0.803521	-0.26972	-0.931731	0.749688	-0.758577	0.643232	-0.709914
YBR085C-A	YBR085C-A	-0.163121	0.329903	0.157112	2.33749	1.35483	0.670062	0.438316	1.3428	0.0660768	0.610123
YBR085W	AAC3	-0.0981699	-1.56287	0.551043	-2.67566	1.15011	-3.39063	-0.289669	0.962645	-0.961719	-0.187937
YBR086C	IST2	0.478121	0.817993	-0.359896	-0.0857041	-0.345122	-0.486975	0.561507	-0.537359	0.758549	-1.07029
YBR087W	RFC5	-0.360876	-0.578223	-0.147333	0.432567	0.925233	-0.234126	-0.551451	-0.300108	-0.590201	-0.390798
YBR088C	POL30	-0.193495	-0.493538	-0.185599	0.326443	1.44553	-0.201162	-0.639398	-0.577121	-0.499778	-0.878366
YBR089C-A	NHP6B	-0.397528	-0.680663	0.212015	0.668598	0.371336	-0.280503	-0.592101	0.244807	-0.669881	-0.301147
YBR090C	YBR090C	-0.82224	-0.521225	0.202456	0.0753088	-0.310274	-0.350062	-0.444617	-0.178505	-0.524414	-1.41055
YBR091C	TIM12	-0.289754	-0.567742	0.193265	0.532182	1.47266	0.54498	-0.657405	-0.0126721	-0.82501	0.111293
YBR092C	PHO3	1.17248	1.06396	0.0915508	0.388447	-1.35909	-0.329586	0.460637	-0.333904	0.485183	-0.438878
YBR093C	PHO5	2.81125	0.515477	1.91584	1.00644	0.791536	0.885898	-0.0836923	-0.806962	1.17019	1.30186
YBR094W	PBY1	0.270233	0.312337	0.402319	0.623924	1.09255	-0.121381	0.217188	-0.237668	0.18834	0.978739
YBR095C	RXT2	-0.651405	-0.608453	0.0193114	0.78387	0.392089	-0.142829	-0.380876	-0.40634	-0.822342	-0.371736
YBR096W	YBR096W	-0.104255	-0.171869	-0.111397	0.00630216	1.20493	-0.65879	-0.0354804	0.0356127	-0.115913	-0.993296
YBR097W	VPS15	0.243367	0.369564	-0.0347135	0.838047	1.0254	-0.171926	0.477494	0.046027	0.529868	-0.34222
YBR098W	MMS4	-0.310481	0.147038	-0.6153	0.215529	0.796721	-0.32822	-0.200175	-0.743768	-0.160044	-0.554685
YBR101C	FES1	-0.679432	-0.883991	-0.127891	0.138181	0.03845	-0.950211	-0.439633	-0.514912	-0.422774	-0.786037
YBR102C	EXO84	0.152736	0.545089	-0.00851216	1.40959	0.991822	-0.338341	0.274975	-0.327033	0.370239	0.320496
YBR103W	SIF2	0.0160905	0.05514	-0.167785	1.15409	0.815813	-0.0163727	-0.0159906	-0.181068	0.114235	-0.242222
YBR104W	YMC2	-0.145506	-0.539504	-0.0597755	-0.731333	0.324664	-1.2403	0.048442	0.0132093	-0.285741	-0.49638
YBR105C	VID24	0.737492	0.60116	0.469272	1.73382	1.84459	1.86812	0.443579	1.45844	0.272986	0.644146
YBR106W	PHO88	-0.765491	-1.29865	0.209312	-0.992413	0.550215	-1.05531	-0.865048	-0.418474	-0.655132	-1.38178
YBR107C	IML3	-0.372662	-0.373216	0.0551941	0.255522	1.42152	-0.312252	-0.378913	0.268445	-0.488938	1.15611
YBR108W	AIM3	0.791223	0.912436	-0.594437	1.81577	0.830878	0.107583	0.480945	0.206795	0.55451	-0.422855
YBR109C	CMD1	-0.689973	-0.772172	0.0222729	0.00580615	0.876536	-0.778438	-0.474942	-0.207114	-0.609141	-1.20908
YBR110W	ALG1	0.227735	-0.306439	0.00345928	0.175093	0.657082	-0.546156	0.226381	0.16736	0.286031	-0.815292
YBR111C	YSA1	-0.653305	-0.625723	0.126796	0.220412	0.619085	-0.567298	-0.945257	-0.00250406	-0.565233	-1.31019
YBR111W-A	SUS1	-1.9557	-0.156683	0.449434	1.48217	1.31799	0.459224	-0.491369	0.142208	-0.963221	0.0874706
YBR112C	CYC8	0.706047	0.349761	-0.0974994	0.654387	-0.329344	-0.255013	0.253088	-0.807846	0.549866	-1.0216
YBR114W	RAD16	0.783906	0.573437	-0.178839	0.84692	0.235097	-0.420952	0.821948	0.430892	0.364896	0.430417
YBR115C	LYS2	0.384344	0.014533	-0.280496	0.399502	0.194139	-0.731744	0.78252	-0.183766	0.592129	-0.939789
YBR117C	TKL2	0.0238052	-0.55703	-0.324036	1.8981	3.02493	0.722303	-0.163912	-0.0136683	-0.00870743	-1.5508
YBR118W	TEF2	-0.531227	-1.14102	0.455462	-0.850895	0.430578	-0.172067	-0.594684	-0.435709	-0.585904	-1.48755
YBR119W	MUD1	-0.0935666	-0.162164	0.123954	1.6302	1.51173	0.11154	-0.0432202	0.177005	-0.265405	0.615977
YBR120C	CBP6	0.36584	-0.108732	0.5313	0.925556	1.49065	0.95527	-0.589921	-0.228903	-0.25019	-0.28547
YBR121C	GRS1	-0.232463	-0.727021	-0.14754	-0.422807	0.330571	-0.767054	-0.241135	-0.745088	-0.055627	-1.51183
YBR122C	MRPL36	-0.332591	-0.512549	0.157222	0.580882	1.56041	0.352684	-0.783841	-0.0727529	-0.602866	0.0650104
YBR123C	TFC1	-0.387054	0.115229	-0.132013	0.53522	0.494882	-0.449237	-0.195209	-0.337228	-0.164507	-0.436619
YBR125C	PTC4	0.272297	0.0853014	0.388061	0.525432	1.05844	-0.0625287	0.154106	0.406702	-0.218247	0.327311
YBR126C	TPS1	0.930261	0.883821	-0.087401	2.03886	1.42101	1.06938	-0.336974	0.585526	0.268114	-0.495719
YBR127C	VMA2	-0.123671	-0.461895	0.121377	-0.220145	0.495422	-0.319922	-0.251696	-0.197907	-0.0879817	-1.1102
YBR128C	ATG14	-0.719619	-0.00885803	0.150924	0.566024	1.87504	-0.103113	-0.201777	0.437713	-0.139796	0.144204
YBR129C	OPY1	-1.07727	-0.952665	-0.396021	-0.142751	0.591766	-0.552819	-1.06632	-0.656075	-0.923793	-0.786511
YBR130C	SHE3	-0.220976	-0.560943	-0.215662	0.816915	0.83567	-0.182439	-0.590411	-0.4695	-0.425417	-0.232092
YBR131W	CCZ1	-0.294865	-0.0750795	0.245501	0.288529	0.850551	-0.143189	0.270721	-0.213669	0.183602	0.381131
YBR132C	AGP2	0.606281	1.73051	-0.0672504	1.2918	1.17875	1.40993	1.04119	-0.68574	1.36643	0.933484
YBR133C	HSL7	-0.0467302	0.229161	0.0391594	0.977443	1.21662	0.0132716	0.389052	0.120119	0.297073	-0.0860731
YBR135W	CKS1	0.02678	-0.275779	0.0973001	0.637494	1.60659	-0.0334064	-0.194148	0.267354	-0.757908	0.059397
YBR136W	MEC1	0.0645757	-0.12993	-0.280028	0.566927	0.546105	-0.314772	0.520392	-0.26526	0.39502	-1.31239
YBR137W	YBR137W	-0.00561222	-0.315027	0.382747	0.399786	1.55969	-0.423201	-0.358787	0.57661	-0.491235	-0.877265
YBR138C	YBR138C	0.0740538	0.93223	-0.0788352	2.31288	0.837746	0.860856	0.0538457	0.142708	-0.133628	1.24833
YBR139W	YBR139W	1.66294	2.06148	-0.0788572	1.91737	1.09456	0.70939	0.123176	-0.398489	1.15705	0.112908
YBR140C	IRA1	0.228065	0.0577587	-0.234805	0.822855	0.990169	-0.440393	0.648412	-0.418788	0.571542	-0.751654
YBR141C	YBR141C	-0.296872	-0.337454	-0.0123476	0.544736	0.55539	-0.616853	-0.322	-0.668038	-0.314863	0.00153822
YBR142W	MAK5	-0.213943	-0.261061	-0.379394	0.041142	-0.0237326	-0.406934	0.141093	-0.626708	-0.0975923	-0.755881
YBR143C	SUP45	-0.271942	-0.753585	-0.020549	-0.197398	0.422102	-0.392652	-0.387438	-0.357507	-0.369967	-1.24986
YBR145W	ADH5	-0.19187	-1.74431	0.421953	-1.22628	0.880808	-1.28442	-0.812748	1.55028	-0.703544	0.770622
YBR146W	MRPS9	-0.124635	-0.300143	0.366094	0.381798	1.40362	0.461921	-0.871213	-0.15617	-0.36254	-0.10595
YBR147W	RTC2	-0.138178	-0.0643076	-0.136674	2.3714	2.56888	1.33068	-0.241647	1.3371	-0.0615412	0.530355
YBR148W	YSW1	-0.459273	-1.31943	-0.103528	0.597828	2.6836	-0.354469	0.663298	1.0696	0.0416109	-0.845002
YBR149W	ARA1	0.545207	1.0475	0.332798	1.82594	1.53063	0.872826	-0.154089	1.10303	0.109229	-0.0410555
YBR150C	TBS1	-0.143411	0.549409	0.210663	0.777639	0.330997	-0.347506	0.29093	0.346388	0.234034	-1.05433
YBR151W	APD1	-0.42928	-0.438866	-0.0200436	0.409795	0.986158	-0.196148	-0.59564	0.116676	-0.5805	-0.323565
YBR152W	SPP381	-0.15915	-0.218926	-0.186468	0.579945	0.672124	0.2479	0.0597604	0.268815	-0.190229	-0.141471
YBR153W	RIB7	-0.31297	0.0010571	0.0647152	0.482974	0.543335	-0.0123731	-0.335732	-0.0960612	-0.376986	0.259028
YBR154C	RPB5	-0.0257838	-0.614134	0.187763	-0.05075	0.362169	-0.197141	-0.199389	-0.33259	-0.382439	-0.910972
YBR155W	CNS1	-0.0955254	-0.565083	-0.00957185	-0.217714	0.435591	-0.969084	-0.240856	-1.0618	-0.103827	-1.22188
YBR156C	SLI15	-0.249809	0.347197	-0.133236	0.528763	0.606456	-0.0597858	-0.260604	-0.785597	0.0742533	-0.342473
YBR157C	ICS2	-0.552399	-0.0258146	0.136386	0.79033	0.45443	1.09123	0.326101	0.284214	0.506923	0.14014
YBR158W	AMN1	0.218902	0.0907592	0.00960372	1.14663	0.361314	0.47248	0.229093	-0.031052	0.29188	-0.794023
YBR159W	IFA38	0.208557	-0.33428	-0.0990831	-0.337258	0.990387	-0.954478	-0.22246	-0.446605	0.114597	-1.05253
YBR160W	CDC28	0.0273154	-0.227656	-0.0504619	1.59313	0.736787	0.0699168	-0.219339	0.129603	-0.236697	-0.0878019
YBR161W	CSH1	0.881043	0.610908	-0.00236195	1.29537	0.774875	-0.121866	0.271306	0.346973	0.431045	0.831486
YBR162C	TOS1	0.279055	-0.39848	0.0989664	-0.269823	0.903528	-0.79441	0.187389	-0.314699	0.18965	-0.721167
YBR162W-A	YSY6	-0.647723	-0.727879	-0.0416197	0.230899	0.402456	-0.538122	-0.474865	-0.0689068	-0.821726	-1.09347
YBR163W	EXO5	0.083773	0.185746	-0.0518284	0.280333	1.34404	-0.260139	0.0910348	-0.0405048	-0.226596	0.245702
YBR164C	ARL1	-0.556245	-0.722168	-0.104555	0.0528064	0.76822	-0.839707	-0.569582	-0.422137	-0.622175	-1.0626
YBR165W	UBS1	-0.385171	-0.124208	0.238045	1.45664	1.03313	0.71184	-0.290615	0.128166	-0.6128	0.568588
YBR166C	TYR1	0.125788	0.0313621	0.0795911	0.805356	0.833738	0.110166	0.0194978	-0.039973	0.00404499	-0.0416616
YBR167C	POP7	-0.350896	-0.53185	0.276222	1.26848	1.59855	0.445647	-0.428261	0.0409849	-0.634512	0.678564
YBR168W	PEX32	-0.293407	-0.189908	-0.535011	0.447731	0.920204	-0.204674	-0.191911	0.196654	0.0219633	0.568475
YBR169C	SSE2	0.165721	0.35849	-0.277981	2.46083	1.07559	1.73329	0.268064	0.290678	0.715258	-1.02344
YBR170C	NPL4	-0.110491	-0.0914593	0.0280537	1.53461	0.747459	0.113886	0.170936	0.205444	0.0537338	0.429949
YBR171W	SEC66	0.0134303	-0.298081	-0.0210911	-0.256301	0.61685	-0.48865	-0.128253	-0.215262	-0.210783	-1.04833
YBR172C	SMY2	0.124998	0.276349	0.123236	0.8951	0.339676	-0.226475	0.160458	-0.271608	-0.0144861	-0.250679
YBR173C	UMP1	0.0194925	-0.0435203	0.21968	1.24825	1.29996	-0.139859	-0.0936089	0.174227	-0.510319	-0.495629
YBR175W	SWD3	-0.28195	-0.242064	0.0528374	0.56739	1.27208	-0.158265	0.152475	0.279118	-0.4532	0.898496
YBR176W	ECM31	-0.0445216	0.0106846	0.0982305	0.169994	1.39971	-0.280028	0.0352525	0.140558	-0.170658	-0.340823
YBR177C	EHT1	0.645408	0.0287907	-0.244145	0.53488	1.45548	-0.305861	-0.0839347	-0.488162	0.492141	-1.15332
YBR179C	FZO1	0.347055	0.236056	0.0177782	1.16649	0.871263	0.044794	0.227822	-0.51599	0.332613	-0.631475
YBR180W	DTR1	-0.583814	-1.10066	0.398373	-0.443691	0.386452	-0.523547	0.274983	-0.0859364	-0.484867	-1.38832
YBR181C	RPS6B	-0.747821	-1.29384	0.340817	-0.861432	0.117542	-0.3099	-0.686094	-0.498907	-0.59006	-1.48198
YBR182C	SMP1	-0.145073	-1.19702	-0.368467	2.02483	0.636378	0.489782	-0.0577701	0.474048	-0.52121	1.28595
YBR182C-A	YBR182C-A	-0.692657	-1.09772	0.325918	-0.433111	-0.00248305	-0.540078	0.502947	0.639413	-0.623679	-1.35176
YBR183W	YPC1	1.88397	1.58761	0.521816	2.61988	0.886906	2.26138	-0.720915	0.66809	1.1297	1.01191
YBR184W	YBR184W	-1.34612	-0.438761	-0.669743	0.764425	0.887507	0.32413	-0.930823	-0.443415	-0.993306	0.618039
YBR185C	MBA1	0.214198	0.146119	0.109181	0.847818	1.57202	0.954994	-0.391645	-0.248428	-0.0877465	-0.0220101
YBR186W	PCH2	-0.390056	-0.842039	0.323183	-0.277783	0.329288	-0.392697	-0.525284	0.143865	-0.42186	-0.937863
YBR187W	GDT1	-0.708435	-1.10481	-0.190119	-1.06588	0.298271	-1.21534	-0.623846	-0.562733	-0.524622	-0.843184
YBR188C	NTC20	-0.417473	-0.566133	-0.0292957	1.10913	1.29086	-0.0761586	-0.671628	-0.201764	-0.675584	0.255045
YBR189W	RPS9B	-0.860525	-1.25034	0.432699	-0.854552	0.0422247	-0.408786	-0.68896	-0.40965	-0.501925	-1.27293
YBR191W	RPL21A	-1.09552	-1.29694	0.362741	-0.6769	0.136448	-0.496842	-0.678519	-0.375515	-0.512651	-1.46475
YBR192W	RIM2	-0.0645838	0.11959	0.0444153	0.212372	0.881939	0.126323	-0.399463	-0.254776	-0.186166	-0.251188
YBR193C	MED8	-0.422844	-0.174681	0.074329	1.03218	1.57162	-0.0934609	-0.678226	0.0101662	-0.679947	0.338804
YBR194W	AIM4	0.250457	0.242855	0.594299	1.74868	1.64169	0.990002	-0.212855	0.872155	-0.71932	0.599879
YBR195C	MSI1	-0.305745	-0.303486	-0.119124	0.469646	0.47194	0.264078	-0.0618215	-0.198945	-0.0239724	-0.458266
YBR196C	PGI1	-0.425325	-0.933227	0.390139	-0.467832	0.391283	-0.205821	-0.454687	-0.756477	-0.261639	-1.50448
YBR196C-A	YBR196C-A	-0.772508	0.870741	-0.446951	1.69744	1.29135	-0.240563	0.583758	0.256371	-0.12849	0.972706
YBR196C-B	YBR196C-B	-0.912009	-0.595528	-0.277073	0.884736	0.521972	-0.41427	0.664719	1.40243	-0.63858	0.757753
YBR197C	YBR197C	0.056282	-0.37082	-0.104705	0.769885	0.830975	-0.140576	-0.365101	-0.190747	-0.340043	1.61121
YBR198C	TAF5	0.436867	0.0962776	-0.293056	1.21433	0.595349	-0.153361	0.339125	-0.495349	0.437474	-0.674879
YBR199W	KTR4	0.305681	0.509627	-0.00463329	0.552314	0.677264	-0.169979	0.123104	-0.254705	0.432583	-0.196942
YBR200W	BEM1	-0.37458	0.0218507	-0.294167	0.835311	1.14141	-0.423521	-0.00504326	0.0268861	0.118104	0.0964366
YBR200W-A	YBR200W-A	-0.597616	-1.10358	0.262048	-0.483143	0.158415	-0.53156	-0.335856	-0.201081	-0.406221	-1.64034
YBR201W	DER1	0.14643	-0.173386	-0.0809858	0.00275218	1.2122	-0.0557885	-0.449742	0.492051	-0.624121	-0.000840077
YBR202W	MCM7	0.320582	0.197518	-0.0904123	0.900061	0.44082	0.48831	-0.0607974	-0.509845	0.28009	-0.378474
YBR203W	COS111	0.950304	-0.607202	0.44296	2.36929	1.86666	0.920864	0.699765	0.857515	0.316299	0.235325
YBR204C	YBR204C	0.124669	-0.393398	-0.0213962	0.394155	1.50244	0.0248868	-0.68173	0.0652933	-0.328259	-0.0561969
YBR205W	KTR3	-0.0423944	-0.190445	0.00547366	-0.365586	0.54397	-0.588066	-0.180884	-0.52135	0.107692	-0.879932
YBR207W	FTH1	0.629953	0.538273	0.18748	0.556203	1.0033	0.281043	0.0915657	0.210608	0.387007	-0.349675
YBR208C	DUR1,2	-0.522243	0.453575	0.105599	0.664874	1.10756	0.248324	1.16259	0.152961	0.672246	0.364162
YBR210W	ERV15	-0.145266	-0.719902	0.0459169	0.290845	1.27272	-0.432102	-0.391944	0.292212	-0.639959	-0.465199
YBR211C	AME1	-0.396246	0.220268	0.194668	1.04023	0.966749	0.737645	-0.479882	0.093904	-0.559112	0.641208
YBR212W	NGR1	0.516068	1.23491	-0.172685	1.55688	0.59493	0.728086	0.025385	-0.420768	0.0447358	0.433725
YBR213W	MET8	0.02588	-0.468495	0.319075	0.085777	1.04906	-0.0992858	-0.00842006	-0.266294	0.116012	-0.0479596
YBR214W	SDS24	0.463286	1.04613	-0.257429	3.26095	2.51706	1.17066	-0.639487	0.712656	0.0163573	0.758936
YBR215W	HPC2	0.0666493	0.076625	-0.436809	1.55757	0.818105	-0.153856	-0.0827384	-0.201757	0.0373817	0.192148
YBR216C	YBP1	0.431099	0.60281	-0.14655	1.76865	1.41408	0.523277	0.415048	-0.245891	0.449814	0.306403
YBR217W	ATG12	-0.364751	-0.959629	0.0205014	0.549647	1.73821	-0.00290844	-0.501252	0.103695	-0.816811	1.20612
YBR218C	PYC2	0.513787	0.483344	-0.15437	-0.613745	-0.056823	-0.564851	0.882543	0.0397823	0.576369	-0.790714
YBR219C	YBR219C	-0.239428	0.0474062	0.121767	0.0468513	0.753407	-0.0176606	-0.147756	0.0516312	-0.092589	-0.378536
YBR220C	YBR220C	0.259464	-0.055218	-0.190904	-0.379177	0.914975	-0.201905	0.372256	-0.404036	0.344555	-0.625127
YBR221C	PDB1	-0.450715	-0.783053	0.102542	-0.544568	0.528822	-0.814379	-0.464255	-0.0943036	-0.352659	-1.0925
YBR221W-A	YBR221W-A	-0.664177	-0.948388	0.297426	-0.584233	-0.0119892	-0.707132	-0.793699	0.216609	-0.627546	-1.2616
YBR222C	PCS60	-0.587184	-0.513352	-0.11237	0.436372	0.786926	-0.563333	-0.586626	-0.0688524	-0.149027	-0.668252
YBR223C	TDP1	-0.0389909	-0.530368	-0.155331	0.716309	1.45846	-0.191766	-0.671719	-0.40038	-0.433605	1.05469
YBR225W	YBR225W	0.0771528	0.66662	0.0983422	1.49818	0.547582	0.442131	0.0336655	-0.262376	0.272145	-0.477232
YBR227C	MCX1	0.0866945	-0.328637	-0.26541	0.270307	1.07005	-0.151764	0.0476327	-0.351377	0.232707	-0.832556
YBR228W	SLX1	-0.430118	-0.0305443	0.47708	0.499456	1.20615	-0.170928	0.092438	0.443186	-0.172319	1.18113
YBR229C	ROT2	0.46813	1.41645	-0.340832	0.471297	0.691941	-0.303719	0.791225	-0.572843	0.899034	-0.673019
YBR230C	OM14	0.158311	0.533392	0.0365855	1.58546	1.35947	1.0887	-0.602262	0.0902633	0.0287235	-0.830233
YBR230W-A	YBR230W-A	0.521617	-0.938901	-0.0449816	1.89173	1.39466	0.352499	-1.05684	0.518452	-0.513414	-0.466044
YBR231C	SWC5	-0.383811	-0.448761	0.214456	1.48419	0.7316	-0.513386	-0.404235	-0.424929	-0.239524	-0.131447
YBR233W	PBP2	0.066133	0.335086	0.278874	1.62743	1.5817	0.457865	-0.393263	-0.214975	-0.32266	0.965534
YBR233W-A	DAD3	-0.326424	-0.788636	0.0888043	-0.124773	0.70402	-0.463306	-0.465278	-0.155317	-0.606831	-0.470476
YBR234C	ARC40	-0.114183	-0.36865	0.02255	0.118835	1.30407	-0.514403	-0.456688	-0.0544086	-0.269101	-0.939413
YBR235W	YBR235W	0.799362	0.749478	-0.285754	0.524843	1.40133	-0.420259	0.947465	-0.0197438	0.733283	0.17222
YBR236C	ABD1	-0.534275	-0.412051	-0.0272053	1.11931	1.24961	-0.18251	-0.372296	-0.0573521	-0.240961	-0.252307
YBR237W	PRP5	0.682394	0.28331	-0.109591	0.944694	0.67252	-0.12426	0.381623	-0.178197	0.146786	0.479411
YBR238C	YBR238C	1.52951	0.602171	-0.246088	-1.05499	-0.570212	-1.13148	1.3749	-0.972305	0.764194	-1.31457
YBR239C	ERT1	0.339976	0.0216658	-0.742785	0.78883	0.772976	0.0363225	-0.0319698	0.0755021	-0.210697	-0.111061
YBR240C	THI2	-0.412155	-1.7575	0.0301221	-0.145996	2.4858	0.303377	-0.175006	0.744218	-0.518982	-0.709224
YBR241C	YBR241C	0.79192	0.470046	-0.370784	1.35022	1.80384	0.549236	0.0815277	0.965066	0.46698	0.178565
YBR242W	YBR242W	-0.691137	-0.694152	-0.139152	-0.205449	0.106257	-1.29471	-0.584328	-0.203643	-0.675675	-0.22369
YBR243C	ALG7	0.194936	0.323331	-0.146673	-0.595315	0.897738	-0.337812	-0.206614	-0.590071	0.196661	-0.752891
YBR244W	GPX2	-1.36606	-1.43445	0.337678	-0.473926	0.469679	-0.456267	-0.168462	-0.660301	-0.550365	-1.41378
YBR245C	ISW1	0.028054	-0.087427	-0.469824	0.70113	0.284005	-0.228892	0.247943	-0.676484	0.324917	-0.997263
YBR246W	RRT2	-0.421014	-0.841427	-0.0537881	0.134703	0.961591	-0.509585	-0.497329	0.439712	-0.803655	0.220411
YBR247C	ENP1	0.239366	-0.28275	0.121106	-0.121882	0.180641	-0.189998	0.188792	-0.613923	-0.0191453	-0.429956
YBR248C	HIS7	-0.00625417	-0.059737	-0.0354081	0.710207	0.313415	-0.40686	-0.205496	-0.550294	-0.0330186	-0.284485
YBR249C	ARO4	-0.424557	-0.927511	-0.0528932	-0.334902	0.0470834	-1.22939	-0.341615	-0.220906	-0.501205	-0.902243
YBR250W	SPO23	-0.247495	-1.24423	0.0950788	-0.218908	2.17437	-0.531447	0.374169	0.130108	-0.0215536	0.267797
YBR251W	MRPS5	0.0841331	0.13323	0.508244	1.42366	1.52631	0.98268	-0.395205	-0.0679706	-0.531159	0.241598
YBR252W	DUT1	-0.889288	-1.3369	-0.0198331	-0.369713	1.01837	-0.847316	-0.737597	-0.536515	-0.764331	-1.45777
YBR253W	SRB6	-0.699367	-1.21027	0.166936	-0.0968523	1.17493	-0.684397	-0.824178	0.292628	-1.09493	0.725097
YBR254C	TRS20	-0.37707	-0.812811	0.107078	0.293976	1.65134	-0.541914	-0.692141	0.0306267	-1.0889	0.0443218
YBR255C-A	YBR255C-A	-1.66846	-1.13668	0.0116241	1.0632	0.980458	0.39321	-0.264859	0.563367	-0.71248	-0.263802
YBR255W	MTC4	0.11182	0.344414	-0.30218	1.37233	0.724537	-0.34646	0.686693	-0.0960689	0.64408	0.067184
YBR256C	RIB5	-0.36647	-0.408397	0.284696	0.467575	1.47916	-0.584842	-0.225432	0.762932	-0.622657	-0.167553
YBR257W	POP4	0.0993743	-0.143344	-0.158933	1.17012	1.03117	-0.294901	-0.15642	-0.113925	-0.332793	0.365208
YBR258C	SHG1	-0.492628	-0.390273	0.339579	1.0542	1.34005	0.253805	-0.389043	0.310147	-0.574647	0.526657
YBR259W	YBR259W	-0.200554	-0.00388827	-0.196459	0.743979	1.09066	-0.569463	-0.119735	-0.264979	0.0251963	0.773773
YBR260C	RGD1	0.241881	0.159894	-0.253475	1.05868	0.940503	0.0315444	0.29401	-0.38751	0.201227	-0.485379
YBR261C	TAE1	-0.376771	-0.796446	-0.138609	0.0999648	1.32121	-0.571488	-0.523894	-0.112225	-0.652613	-1.01841
YBR262C	AIM5	-0.338116	-0.488771	0.38825	0.319915	2.03925	0.819451	-0.957706	-0.201384	-0.695273	-0.179462
YBR263W	SHM1	-0.463821	-0.487016	0.0264307	-0.548869	0.593933	-1.07719	-0.321132	-0.123196	-0.184586	-0.835342
YBR264C	YPT10	-0.606999	-0.535256	-0.109665	0.847057	1.15973	-0.0378738	-0.664374	-0.0250231	-0.652935	-0.229073
YBR265W	TSC10	-0.692021	-1.00017	-0.672203	-0.49106	0.641369	-0.722307	-1.25574	-1.09045	-0.654117	-0.793581
YBR267W	REI1	0.104917	-0.141758	0.189894	-0.0711751	0.393012	0.111476	0.174948	-0.627292	-0.0616001	-0.368035
YBR268W	MRPL37	-0.310601	-0.624713	0.251934	0.383114	1.96809	0.265785	-0.726001	-0.00494883	-0.694533	-0.37386
YBR269C	FMP21	-0.269635	-0.0113944	0.306693	1.51498	1.77286	0.676173	-1.00093	0.139996	-0.278563	-0.388187
YBR270C	BIT2	-0.30282	0.211306	0.300583	0.808288	1.21067	-0.482049	0.299612	0.453444	-0.214701	1.93489
YBR271W	YBR271W	-0.626161	-0.642903	-0.21017	0.138811	0.706357	-0.619492	-0.361008	-0.534372	-0.429623	-0.412565
YBR272C	HSM3	-0.667843	-0.11245	0.13843	1.38677	1.42219	0.129704	-0.16746	0.632318	-0.266754	0.601812
YBR273C	UBX7	0.0107646	0.312183	0.221156	1.49601	1.35285	0.142345	-0.178896	0.156609	-0.178344	-0.179667
YBR274W	CHK1	-0.613326	-0.390348	0.0640394	0.3846	0.933971	-0.212194	-0.301797	0.203134	-0.5027	0.863846
YBR275C	RIF1	0.183042	0.160432	0.0623401	0.751514	0.790501	-0.0979678	0.625486	-0.206711	0.667938	0.0890326
YBR276C	PPS1	-0.350549	-0.0390831	-0.175108	-0.0960596	0.91946	-0.602343	-0.0281385	-0.303355	-0.149063	-0.860391
YBR278W	DPB3	-0.689685	-0.566566	-0.0863241	1.35825	1.40578	-0.0115255	-0.654112	0.263379	-0.816987	0.416163
YBR279W	PAF1	-0.111878	0.286772	-0.153571	1.29449	0.477546	0.381668	0.0928568	-0.190875	0.0149893	-0.34506
YBR280C	SAF1	-0.213471	-0.174154	-0.807219	1.74827	1.38767	0.729989	0.0841476	0.684707	-0.000623696	-0.63525
YBR281C	DUG2	-0.103431	0.422879	-0.053118	0.836605	0.676455	0.0349806	0.541226	-0.562227	0.578732	-1.18658
YBR282W	MRPL27	0.305836	-0.0253067	0.659033	0.613341	1.71342	0.752577	-0.372603	0.218148	-0.126958	-0.0590961
YBR283C	SSH1	0.10588	-0.308642	-0.19941	-0.49899	0.490349	-0.770451	0.0473142	-0.335112	0.0472857	-0.42344
YBR284W	YBR284W	-0.0335863	0.872713	-0.00121213	1.75153	2.5844	0.395641	1.03642	0.59121	-0.0514985	1.02144
YBR285W	YBR285W	-0.0472441	-0.219356	0.500809	1.5968	0.393462	0.822119	-0.192076	1.46213	-0.410924	-0.699988
YBR286W	APE3	0.468731	0.34266	0.172002	0.246518	0.668109	-0.381293	0.344888	-0.405937	0.422193	-1.02829
YBR287W	YBR287W	0.870896	0.727484	0.0922692	0.734019	1.11044	0.547698	0.309614	0.707847	0.383011	0.427676
YBR288C	APM3	-0.122268	-0.320654	-0.229818	0.911026	1.02772	-0.227461	-0.279436	-0.155641	-0.263991	-0.443822
YBR289W	SNF5	0.0937694	0.247036	0.0736793	1.43363	0.225754	-0.000371957	-0.0115183	-0.539573	0.0758033	-1.00913
YBR290W	BSD2	0.154219	0.345918	0.0380569	1.8039	1.13339	0.476027	0.054661	0.335103	-0.0452469	0.0832588
YBR291C	CTP1	-0.00464847	-0.741247	-0.0470404	0.209612	1.15211	-0.27515	0.317559	0.717701	-0.494027	0.717564
YBR293W	VBA2	-0.399667	-0.682807	0.110467	0.445893	1.39086	-0.404765	-0.0566557	0.457482	-0.366332	1.87784
YBR294W	SUL1	-1.00923	-0.358094	-0.139461	0.486803	1.54749	-0.561884	-0.375139	0.315861	-0.410797	-0.329412
YBR295W	PCA1	-0.0556336	-0.242812	0.168953	1.54423	1.68941	-0.147727	0.75437	1.14351	0.103517	1.61374
YBR296C	PHO89	-0.0231683	0.230737	1.19237	2.76945	0.987859	2.87065	0.764089	0.983106	0.529149	2.1283
YBR296C-A	YBR296C-A	-0.647261	-0.958684	0.283622	0.0108381	0.143209	-0.37262	0.443524	1.41488	-0.423782	-1.13681
YBR297W	MAL33	0.120398	0.209863	0.0905134	1.61327	1.64197	1.7841	0.402225	1.05249	-0.763109	1.27692
YBR298C	MAL31	0.72219	1.54756	-0.371301	1.30261	1.82294	0.182712	0.906834	-0.291793	0.398717	2.51883
YBR298C-A	YBR298C-A	-0.378982	-0.51176	0.114201	0.79738	-0.0845949	0.196186	0.970446	1.0249	-0.428841	-0.423649
YBR299W	MAL32	-0.200149	-0.589774	-0.00579956	0.0062676	1.1236	-0.0568741	-0.127258	0.207992	-0.300258	0.41956
YBR301W	PAU24	-0.454119	-1.48673	0.833338	2.86488	2.43905	0.221665	0.405732	1.28045	-0.569795	1.53524
YBR302C	COS2	0.141493	-0.064272	0.116084	0.195494	0.647018	0.0335168	-0.166964	0.0829821	0.095763	-0.596278
YCL073C	YCL073C	-1.22645	-1.13532	0.0744726	-0.290787	1.30262	0.914049	0.556295	0.96155	0.185758	2.41507
YCL069W	VBA3	-0.77086	-0.883754	0.324499	-0.0130068	0.200913	-0.207158	-0.575602	0.298147	-0.526819	0.854533
YCL068C	YCL068C	-0.705737	-0.450385	-0.0576869	0.428813	0.313396	0.658519	0.243348	0.226476	-0.343813	0.144206
YCL066W	HMLALPHA1	-0.677732	-0.958602	0.228744	-0.227501	-0.0280173	-0.559361	-0.482985	-0.0603531	-0.543777	-1.59017
YCL064C	CHA1	-0.585692	-0.864492	0.379837	0.778422	-0.234179	0.831362	-0.173498	0.29274	-0.162811	-0.452354
YCL063W	VAC17	-0.926936	-0.0491792	-0.141643	-0.409853	-0.437758	0.270712	-0.507919	-0.225647	-0.265789	-0.402674
YCL061C	MRC1	-1.02578	0.00119959	-0.426652	-0.260169	-0.484439	-0.518372	-0.00760395	-0.165306	0.184355	0.407327
YCL059C	KRR1	-1.59228	-0.785647	-0.0760454	-0.831356	-0.550167	-0.79011	-0.409034	-0.714761	-0.534422	-1.27217
YCL058C	FYV5	-1.06656	0.16139	0.18533	-0.488795	0.190939	-0.523437	1.56649	2.51395	-0.428247	-0.150075
YCL057W	PRD1	-0.70648	0.291522	-0.138889	-0.0631707	-0.0355123	-0.00544659	0.3829	-0.0808006	0.465041	-0.810352
YCL057C-A	YCL057C-A	-0.830962	-0.449543	0.279107	0.13805	0.678653	0.449576	-0.620838	-0.0279253	-0.403286	-0.645908
YCL056C	YCL056C	-1.19757	-0.250961	0.0968953	-0.307298	0.828874	-0.40153	-0.375994	0.199265	-0.380987	0.409251
YCL055W	KAR4	-1.0841	0.103952	0.233425	1.25688	-0.249983	0.407161	0.0351349	0.0671016	-0.24015	0.0180968
YCL054W	SPB1	-0.6377	0.683135	-0.439763	-0.253245	-0.94573	0.31713	0.516426	-0.0480691	0.243437	-0.548778
YCL052C	PBN1	-1.21798	-0.348525	0.0147329	0.134365	0.297963	0.269365	-0.486769	0.182234	-0.476222	0.0131061
YCL051W	LRE1	-0.85738	0.215998	-0.45587	-0.376347	-0.299504	-0.0966765	0.0114034	-0.336888	0.123916	-0.832076
YCL050C	APA1	-1.09197	-0.570714	0.0637747	-0.989165	-0.375856	-1.2724	-0.261068	-0.351951	-0.254074	-1.20044
YCL049C	YCL049C	-0.9471	0.36119	0.585371	1.73853	1.65383	1.26264	1.52539	2.25997	-0.135931	1.17307
YCL048W	SPS22	-0.792782	-1.05801	0.0661078	-0.238527	0.796236	0.00811419	-0.236055	0.925431	-0.520247	0.346241
YCL047C	YCL047C	-1.32836	-0.900452	-0.0163851	-0.635377	0.46013	-0.395035	-0.470263	0.513218	-0.428362	-0.769096
YCL045C	EMC1	0.0338092	0.828871	-0.0811341	-0.705092	-0.479892	-0.535494	0.68182	-0.930342	0.873882	-0.577953
YCL044C	MGR1	-0.910863	0.192586	0.0119009	0.227621	-0.228322	0.573498	-0.157004	0.145281	0.0201243	-0.532791
YCL043C	PDI1	-0.697929	-0.217772	-0.0243247	-0.597949	0.0922251	-0.115215	0.00550844	-0.108285	0.195214	-1.32249
YCL042W	YCL042W	-0.469495	-0.481294	0.499159	0.0187965	0.047004	0.390434	-0.900429	-0.135621	-0.444337	-1.29736
YCL040W	GLK1	0.892815	1.82744	0.218564	2.76211	1.50288	2.69305	-0.992873	1.0172	0.513502	0.0969023
YCL039W	GID7	-1.1411	0.350309	0.155683	1.1953	-0.157761	0.0156558	0.37976	0.405756	0.158301	1.95446
YCL038C	ATG22	0.384939	1.21739	0.311704	0.553387	0.276635	0.556991	1.11756	1.13048	0.569409	0.851586
YCL037C	SRO9	-0.414638	-0.475086	-0.327687	-0.767821	-0.115667	-0.948696	-0.126889	-1.50184	-0.206704	-0.235517
YCL036W	GFD2	-1.61936	-1.0626	-0.246181	-1.49626	-1.37916	-1.31265	-0.234833	-0.489212	-0.515432	0.121059
YCL035C	GRX1	-1.13915	-0.271217	0.227727	0.589707	0.756488	0.430642	-0.666802	0.562779	-0.548866	-0.640351
YCL034W	LSB5	-1.20158	0.0602166	0.219042	0.997049	0.322812	0.336889	-0.407935	0.192648	-0.210905	0.247855
YCL033C	MXR2	-1.46984	-0.744642	0.251048	0.0121721	0.748815	-0.278441	-0.821552	0.449738	-0.771415	-0.762458
YCL032W	STE50	-0.827876	-0.104418	0.142612	0.331283	0.53602	0.0553241	-0.365572	-0.2555	-0.155946	0.218359
YCL031C	RRP7	-1.34352	-0.226549	-0.0311882	0.0405027	-0.200552	0.0419093	-0.235976	-0.0694982	-0.580889	-0.248346
YCL030C	HIS4	-1.25069	0.0763853	-0.233977	-0.469654	-0.707442	-0.931057	-0.537815	-0.0253843	-0.17292	-0.834384
YCL029C	BIK1	-0.927939	0.0141982	0.267387	-0.284797	0.00321992	0.0676317	0.115517	-0.236577	-0.0777522	0.237132
YCL028W	RNQ1	-1.08086	-0.211538	0.0794344	-0.500805	-0.196002	-0.48229	-0.481026	-0.599658	-0.113278	-1.12069
YCL027W	FUS1	-2.19583	-0.161921	-0.169638	0.471888	-1.91029	-0.0151791	0.78609	-0.414876	0.459091	-0.901891
YCL026C-B	HBN1	-0.651037	-1.84662	0.446047	-0.0327997	0.723228	0.066828	1.43057	0.947556	-0.320903	-1.87331
YCL026C-A	FRM2	-1.32545	-2.11911	0.476149	-1.93646	1.52974	-1.55154	2.87446	1.25712	-0.318916	-0.0991009
YCL025C	AGP1	-0.987664	2.09526	-0.343802	0.0316039	0.330537	1.15735	0.123107	-0.0268345	0.204418	-0.104506
YCL024W	KCC4	-0.797233	0.693012	0.106344	0.739253	-0.605332	0.481907	0.356468	-0.25668	0.24478	-0.446635
YCL021W-A	YCL021W-A	-2.03387	-0.197106	-0.472469	-0.975834	-2.16439	-0.721421	0.928964	0.107621	-0.333667	-0.590781
YCL018W	LEU2	-0.975946	-0.990414	-0.0857429	-0.361532	-0.489987	-0.651324	-1.02841	-0.431639	-0.772811	-1.76765
YCL017C	NFS1	-0.912687	-0.255578	-0.101915	-0.474552	0.00137156	-0.325609	-0.130503	-0.0741209	0.118386	-0.670209
YCL016C	DCC1	-1.2269	0.23757	0.266917	1.26857	0.0314788	0.325314	-0.0937306	0.22593	-0.375919	1.29413
YCL014W	BUD3	-0.717994	1.14101	-0.364865	0.126972	-0.468214	-0.344477	0.78245	-0.180272	0.657821	-0.766751
YCL012C	YCL012C	-1.32851	-0.703598	0.0736402	-0.86323	0.839159	-0.840828	-0.825595	0.0193816	-0.398367	0.138988
YCL011C	GBP2	-1.14588	-0.502232	-0.291333	-0.898463	-0.382755	-0.796136	-0.155623	-0.332153	-0.278778	-0.619204
YCL010C	SGF29	-0.403761	-0.760043	-1.18366	-0.590146	0.0144315	0.257016	-0.193663	0.660494	-0.549436	0.410657
YCL009C	ILV6	-1.40456	-0.75437	0.0940798	-1.20388	-0.19112	-1.1058	-0.481509	-0.185461	-0.357739	-1.08381
YCL008C	STP22	-0.83057	0.0331865	0.0390884	0.367779	-0.235788	-0.438722	-0.118541	0.609252	-0.344481	0.36677
YCL005W-A	VMA9	-1.44932	-0.844317	0.244709	-0.491802	0.224397	-0.345156	-1.03539	-0.30545	-0.699804	-1.20346
YCL005W	LDB16	-1.0239	-0.221391	0.424691	-0.842428	0.0202566	0.188907	-0.487182	0.288346	-0.552269	0.336259
YCL004W	PGS1	-2.31405	0.517023	-0.183321	-0.274397	-0.168686	-0.73528	-0.104414	-0.247043	-0.162032	0.399325
YCL002C	YCL002C	-2.00115	-1.01074	0.168174	-1.38321	-0.122285	-0.466174	-0.451557	-0.221559	-0.573338	-0.00909522
YCL001W-B	YCL001W-B	-0.745213	-1.10781	0.245358	-0.389816	0.10981	-0.557696	-0.507238	0.061533	-0.560374	-1.22628
YCL001W-A	YCL001W-A	-0.790199	-1.09254	0.162148	-0.555404	0.173664	-0.678607	-0.25116	0.311104	-0.492858	-0.648616
YCL001W	RER1	-1.54282	-0.823201	-0.100678	-0.940188	-0.151767	-0.76482	-0.484885	-0.350342	-0.39438	-1.23219
YCR002C	CDC10	-1.07942	-0.0694544	0.266337	0.558937	0.382804	-0.105266	-0.429741	-0.269407	-0.143473	-0.860455
YCR003W	MRPL32	-0.846148	-0.227082	0.426324	-0.283311	1.05563	0.949941	-0.600879	0.064608	-0.372897	0.00898911
YCR004C	YCP4	-1.24933	-0.363452	0.0609709	-0.655281	0.00713731	-0.399848	-0.716542	-0.178955	-0.459156	-1.03945
YCR005C	CIT2	-0.799673	0.0698811	0.280269	0.705481	0.665087	-0.107533	0.0738496	0.459973	0.172033	-0.0429224
YCR007C	YCR007C	-1.33829	-0.72167	-0.0856176	1.60391	0.768196	-0.0559302	0.193709	1.12641	-0.455993	2.37236
YCR008W	SAT4	-0.407427	-0.206897	-0.0919086	-0.629625	-0.548242	-0.717778	0.47963	-0.268312	0.508287	-0.359319
YCR009C	RVS161	-1.28329	-0.199802	-0.0594111	0.146357	0.206058	-0.378437	-0.646762	-0.243826	-0.470722	-0.339155
YCR010C	ADY2	-1.10042	-0.307349	-0.230191	-0.123533	0.902269	-0.534125	-0.0900539	-0.403521	-0.192076	-0.709139
YCR011C	ADP1	-0.392194	0.947977	0.0245298	-0.218887	-0.0497958	-0.264749	0.756613	-0.451732	1.00176	0.144659
YCR012W	PGK1	-0.884767	-1.12762	0.410651	-0.993779	-0.190565	-0.477563	-0.621557	-0.495924	-0.501172	-1.57436
YCR014C	POL4	-0.463297	0.940407	-0.159918	0.150601	0.15094	-0.411711	1.16521	0.912338	0.709224	1.46503
YCR015C	YCR015C	-0.725359	-0.436826	-0.0477171	-0.0857464	0.317094	-0.514997	-0.79503	0.0905935	-0.490037	0.250246
YCR016W	YCR016W	-1.08341	-0.337808	-0.269674	-0.363498	-0.631586	-0.495494	0.00495025	-0.114044	-0.282794	-0.485715
YCR017C	CWH43	0.0576137	1.2529	-0.346222	-0.444853	-0.272944	-0.631376	1.37539	-0.546053	1.06331	-0.506431
YCR018C	SRD1	-1.45246	-0.987494	0.15473	-1.69556	-0.761516	-0.264749	-0.224151	0.726195	-1.43618	0.523408
YCR019W	MAK32	-1.21608	0.0123276	-0.146802	-0.218114	0.219462	0.13898	-0.0490938	0.0095529	-0.275935	0.374414
YCR020C	PET18	0.343948	1.44485	1.37232	0.858413	1.26422	0.51883	1.13275	1.59921	0.53646	2.27086
YCR020C-A	MAK31	-1.74073	-0.998328	0.200174	-0.238947	-0.211631	-1.07014	-0.651936	0.0434158	-0.978696	-0.130706
YCR020W-B	HTL1	-2.52143	-0.0636659	0.622465	-0.660816	0.519525	-0.116697	-0.076214	0.227464	-1.15995	2.32004
YCR021C	HSP30	-0.483522	0.329097	-0.493734	1.08033	0.652937	2.01632	0.941318	-0.42831	0.115859	-1.2978
YCR023C	YCR023C	-1.33491	0.220636	-0.401856	-0.724117	0.3087	0.0398806	0.163421	-0.00508572	0.0950109	0.348907
YCR024C	SLM5	-0.7389	0.177767	0.315155	-0.293153	0.469114	0.327732	-0.133671	0.144355	0.21716	-0.195479
YCR024C-A	PMP1	-0.644583	-0.319116	0.158917	-0.132855	-0.627903	-0.824318	0.157727	-0.677326	0.257845	-0.654756
YCR024C-B	YCR024C-B	-0.247089	-0.473839	0.412013	-0.569563	-0.597572	-0.688841	0.176973	-0.866717	0.381201	-0.833683
YCR026C	NPP1	-0.851959	0.317426	-0.143115	-0.146445	-0.396373	-0.360132	0.434629	-0.292947	0.477222	-0.611594
YCR027C	RHB1	-0.615386	-0.127897	-0.247344	0.28554	0.0130689	0.173629	-0.103851	-0.101162	-0.157072	0.683254
YCR028C	FEN2	-0.228709	-0.158286	-0.149807	-0.432826	-0.0848559	-0.142789	0.396574	-0.540922	0.451356	0.638391
YCR028C-A	RIM1	-1.81673	-1.32684	0.0827534	-0.778643	0.0655854	-0.768097	-0.890527	-0.433058	-0.918462	-1.40245
YCR030C	SYP1	0.591047	1.42644	-0.297779	0.404899	-0.228309	0.401137	1.08869	0.0196615	1.41475	-0.420388
YCR031C	RPS14A	-0.915197	-1.26016	0.371592	-0.945267	-0.0222725	-0.439244	-0.612083	-0.431115	-0.537692	-1.46524
YCR032W	BPH1	-0.801358	-0.0702293	-0.0501832	-0.266571	-0.00773674	0.0737828	0.627909	0.225116	0.382082	0.367449
YCR033W	SNT1	-0.975887	0.276237	-0.244963	-0.345545	-0.780171	-0.515586	-0.10911	-0.522782	-0.0124084	-0.926062
YCR034W	FEN1	-0.360458	-0.269623	-0.505485	-1.55374	-0.777145	-1.18502	-0.166702	-1.05351	0.151125	-1.18585
YCR035C	RRP43	-0.946741	-0.253751	-0.0211456	-0.252902	-0.14759	-0.0897435	-0.248454	-0.444679	-0.488369	-0.584144
YCR036W	RBK1	-1.32531	-0.0568662	0.336287	0.0800008	-0.084516	-0.0336921	-0.202867	0.459166	-0.243151	0.390759
YCR037C	PHO87	-0.967184	0.131612	-0.00763417	0.395569	0.158273	-0.569213	0.438871	0.139176	0.410544	0.816976
YCR038C	BUD5	-0.688225	0.0264874	-0.213627	0.212356	-0.109683	-0.107476	0.115166	-0.162452	0.0358323	0.284428
YCR042C	TAF2	-0.570269	0.916718	0.275258	0.61761	-0.425428	0.13937	0.737238	-0.417488	0.644343	-0.0661835
YCR043C	YCR043C	-1.55568	-1.17683	-0.110388	-1.22319	-0.299615	-0.759553	-0.744652	0.0528004	-0.836344	-0.712657
YCR044C	PER1	-0.641147	-0.230746	-0.0589167	-0.927166	0.324889	-0.583759	-0.50594	-0.133683	-0.13687	-0.325705
YCR045C	RRT12	-0.929432	-1.00349	0.235186	-0.256113	0.0155343	-0.376142	-0.140508	0.163123	-0.258992	-0.731909
YCR046C	IMG1	-1.0547	-0.649324	0.380089	-0.198436	1.11005	0.210379	-0.854316	-0.0549208	-0.428083	-0.534019
YCR047C	BUD23	-0.743385	-0.158796	0.154853	-0.3375	-0.2668	-0.544442	0.0500604	-0.289786	-0.194957	-0.579097
YCR048W	ARE1	-0.795703	-0.213407	0.0625636	-0.794223	0.462758	-0.26333	0.0647517	0.481172	-0.144449	-0.232016
YCR051W	YCR051W	-1.45247	-1.11569	-0.10303	-1.57701	-0.153902	-0.933637	-0.686247	-0.767919	-0.719779	-0.966516
YCR052W	RSC6	-1.03146	-0.426729	-0.0281773	-0.414783	-0.41473	-0.454749	-0.454246	-0.147506	-0.299684	-0.38978
YCR053W	THR4	-0.994505	-0.768448	-0.069049	-0.742306	-0.270915	-0.707566	-0.546225	-0.40115	-0.400752	-1.20028
YCR054C	CTR86	-1.65903	0.0988347	-0.0398447	0.271374	-0.466369	-0.0957452	0.424439	-0.0297659	-0.0089742	-0.281911
YCR057C	PWP2	-1.00024	0.0820032	0.0514749	-1.1099	-0.967246	-0.64401	0.328925	-0.647335	0.0576284	-0.455944
YCR059C	YIH1	-1.58792	-1.31089	0.222529	-0.790903	0.172217	-0.523705	-0.597535	0.00441961	-0.64659	-0.213548
YCR060W	TAH1	-1.21928	-1.12309	0.116295	0.0102462	0.237921	-0.363102	-0.0932034	0.609299	-0.851569	-0.226666
YCR061W	YCR061W	0.768406	2.21973	-0.020032	0.28125	0.28536	0.256414	1.65195	0.143792	1.46085	0.953314
YCR063W	BUD31	-1.59117	-0.680969	-0.0934955	0.774377	0.435093	0.0901748	-0.57151	0.357309	-1.00093	0.94775
YCR065W	HCM1	-0.972057	0.0119317	-0.479409	0.130785	-0.421906	0.142309	0.0324019	-0.916482	0.296587	-0.11692
YCR066W	RAD18	-1.23298	0.00408555	-0.0975766	0.0179083	-0.528518	0.076262	0.07227	-0.00201787	-0.225667	0.528245
YCR067C	SED4	-0.374526	0.47085	-0.283831	-0.451854	-0.754516	-0.319321	0.63718	-0.291639	0.684059	-0.471034
YCR068W	ATG15	-0.50157	-0.156359	-0.0399003	0.0950323	-0.144186	-0.300311	0.280516	0.0667765	0.181871	-1.00839
YCR069W	CPR4	-0.34722	0.345425	0.156499	-0.865625	0.309891	-0.606903	0.358998	0.254434	0.690977	-0.454935
YCR071C	IMG2	-1.12716	-0.633466	-0.0920731	-0.243187	1.10109	0.490843	-0.682199	-0.0911782	-0.554232	-0.524557
YCR072C	RSA4	-0.788138	-0.217604	0.028415	0.0354661	-0.567666	-0.112338	0.111543	-0.622899	0.00966306	-0.532044
YCR073C	SSK22	-1.02161	-0.0621122	0.0378157	-0.430563	0.0397216	-0.86305	0.456829	0.358583	0.193403	0.473846
YCR073W-A	SOL2	-0.971931	-0.106026	0.127909	0.603971	0.448075	0.138424	-0.467133	0.492831	-0.433137	-0.488002
YCR075C	ERS1	-1.88514	-0.433114	-0.552357	-0.836521	0.447714	-0.643664	-1.599	-0.502302	-0.761718	-0.133717
YCR075W-A	YCR075W-A	-1.70878	-0.621004	0.0949236	-0.398944	0.274136	-0.309201	-0.916718	0.14481	-0.660746	-1.3016
YCR076C	YCR076C	-1.28717	-0.331861	0.0126771	-0.0765962	0.71731	-0.0167496	-0.457285	0.338615	-0.532052	0.231449
YCR077C	PAT1	-0.501363	-0.117783	-0.272231	-0.809602	-6.46154	-0.195271	0.227973	-0.634144	0.251673	-0.56999
YCR079W	PTC6	-0.569401	-0.0280587	-0.108125	-0.19786	0.922954	0.540272	-0.48126	0.180421	-0.340137	-0.421768
YCR081W	SRB8	-0.694034	0.142507	-0.341377	0.132239	-0.628998	-0.185636	0.599926	0.215608	0.209784	-0.515862
YCR082W	AHC2	-1.49591	-0.846091	0.168732	-0.649474	0.217843	-0.435401	-0.379137	-0.118714	-0.661482	-0.554215
YCR083W	TRX3	-1.66523	-0.768605	0.360357	0.0724127	0.193686	0.0214459	-0.454285	0.382865	-0.719467	-0.475723
YCR084C	TUP1	-0.464863	0.204334	-0.208679	-0.748368	-0.461261	-0.496722	0.135133	-1.28711	0.321651	-0.926539
YCR086W	CSM1	-1.02507	0.055969	0.10614	0.64879	0.191561	0.0959588	0.0163199	0.525041	-0.186336	0.129335
YCR087C-A	YCR087C-A	-1.56024	-1.19525	-0.080417	-1.53409	-0.416735	-1.04893	-0.47545	-0.903826	-0.81301	-0.86214
YCR088W	ABP1	-0.943031	0.33078	0.0229669	0.430896	-0.154958	0.048906	-0.311061	-0.408396	0.0983953	-1.09815
YCR089W	FIG2	-0.357401	0.631259	-0.0827242	1.14757	-0.335343	-0.641744	1.23437	-1.06941	0.870094	1.5308
YCR090C	YCR090C	-1.85686	-1.86685	-0.0151828	-0.867816	0.0481518	-0.673292	-0.881355	-0.163093	-1.23766	-0.991417
YCR091W	KIN82	-0.402645	0.992879	-0.393648	0.895244	-0.0230497	0.621794	0.464668	-0.223869	0.573039	0.246606
YCR092C	MSH3	-1.07625	0.188292	-0.307327	0.000930644	-0.782872	-0.348181	0.409788	-0.421312	0.146935	-0.280718
YCR093W	CDC39	-1.07807	-0.239053	-0.47125	-0.470247	-0.981883	-0.631766	0.402308	-0.47049	0.662482	-1.38189
YCR094W	CDC50	-0.7242	-0.0975366	-0.24278	-0.28183	-0.140469	-0.673276	-0.350718	0.109777	-0.271786	-0.620189
YCR095C	OCA4	-0.982375	0.669859	0.311427	0.846453	0.0941021	0.475492	0.189638	0.18918	-0.248889	0.308152
YCR096C	HMRA2	-1.54535	-0.22319	0.215324	-0.356168	0.341869	-0.250386	-0.497776	0.500874	-0.542636	0.975796
YCR097W	HMRA1	-1.97127	-0.748321	-0.200563	0.199665	-0.116788	-0.587879	-0.656941	0.0565964	-0.711595	-0.823539
YCR098C	GIT1	-0.485104	-0.822272	-0.213405	-0.558743	0.85608	0.680703	0.87675	0.915111	0.131754	2.4259
YCR099C	YCR099C	-1.06375	0.14326	-0.253745	0.125149	0.71942	-0.252992	0.841448	-0.312838	0.344068	2.21783
YCR100C	YCR100C	-0.987735	-0.302337	-0.381501	0.490133	0.539232	-0.48625	0.443225	-0.547202	0.250234	1.00584
YCR101C	YCR101C	-0.589961	-1.00988	0.209522	-0.135721	0.461178	-0.252078	-0.215219	0.00719823	-0.391864	-0.933343
YCR102C	YCR102C	-0.489855	-0.947922	0.231351	-2.55727	1.66388	-1.49584	1.524	0.224401	0.421319	-0.182375
YCR104W	PAU3	-1.08889	-1.5831	-0.209186	-0.318869	1.72223	-0.298259	1.02447	1.32313	-0.59353	1.7371
YCR105W	ADH7	-1.02217	-1.77864	0.21749	-1.25498	1.00403	-0.749152	-0.0516458	0.207908	-0.153042	-0.931454
YCR106W	RDS1	-1.28947	-2.34822	0.0418525	-2.7207	0.588905	-0.0100435	0.157479	0.0673378	-0.150418	1.7043
YCR107W	AAD3	-0.987313	-1.10511	0.0514063	-1.27195	0.734164	-0.0624532	1.33307	0.0663446	0.785648	1.52977
YCR108C	YCR108C	-0.353805	-1.1305	0.243806	1.02218	0.413009	0.988267	0.790632	0.708689	-0.570878	0.331009
YDL248W	COS7	-0.205768	-0.586719	-0.533737	1.21017	0.833844	0.659323	-0.156833	0.301506	-0.330799	0.673396
YDL247W	MPH2	-0.604829	-0.634411	-0.161273	-0.333777	0.492224	-0.35694	0.81819	0.825771	-0.153545	-0.226766
YDL246C	SOR2	-1.9768	-3.08446	0.68671	-1.57471	0.265234	0.531397	-0.630187	1.05066	-1.14055	1.34147
YDL245C	HXT15	-0.396672	-0.618614	0.263819	-0.254901	-0.0985283	-0.534253	-0.0974216	-0.129376	-0.411162	-1.43603
YDL244W	THI13	0.252318	-2.62077	0.279522	0.797721	1.95775	1.06837	0.346614	2.10277	-0.33726	1.45987
YDL243C	AAD4	-0.61122	-0.805224	0.492626	-0.86374	0.841331	-0.846381	0.560925	0.33243	0.127215	1.8294
YDL241W	YDL241W	0.161617	-0.829134	0.228124	-1.46501	-0.272666	-0.446629	-0.289523	1.27395	-1.75183	0.717108
YDL240W	LRG1	-0.2775	-0.0280243	-0.668266	-0.42948	-0.862731	-0.181697	-0.114871	-1.01031	0.0191899	-2.07157
YDL239C	ADY3	-0.781232	0.124766	-0.455321	-0.112824	0.37401	-0.530763	0.467423	0.389549	0.0336983	0.944591
YDL238C	GUD1	-0.702197	-0.750709	-0.352271	0.556184	0.377558	-0.0957936	-0.396233	-0.28317	-0.230326	0.219675
YDL237W	AIM6	0.0707996	0.374308	-0.182166	-0.386389	0.27678	-0.430689	-0.150271	-0.294215	0.297308	-0.572176
YDL236W	PHO13	-0.0284834	-0.383327	-0.0412556	-0.320549	-0.211525	-0.494805	-0.409459	-0.309029	-0.415062	-0.786941
YDL235C	YPD1	-0.360393	-0.459156	0.147596	0.0621674	0.201001	-0.222849	-0.269774	0.2294	-0.305565	-0.706834
YDL234C	GYP7	0.444216	0.717135	-0.185031	1.93318	0.354787	0.547371	0.348629	0.61267	0.270313	0.440759
YDL233W	YDL233W	0.0744526	0.2172	-0.508444	0.714757	0.110469	0.420026	-0.161666	0.173378	-0.343527	-0.149864
YDL232W	OST4	-0.50017	-0.938104	0.173853	-0.427396	0.029915	-0.546466	-0.557186	-0.193988	-0.58881	-0.939809
YDL231C	BRE4	0.0719706	0.0550393	0.114977	-0.315363	0.201267	-0.347937	0.413532	0.18309	0.0808707	1.15675
YDL230W	PTP1	0.175689	0.179184	0.259711	-0.0228623	0.793788	0.443272	-0.328872	0.665399	-0.13689	0.0258917
YDL229W	SSB1	-0.416734	-1.00027	0.128519	-1.17605	-0.388166	-0.43253	-0.325641	-0.515877	-0.332829	-1.55823
YDL227C	HO	0.562582	-1.19663	-0.330751	-0.481554	-1.76259	0.604846	-0.457	-1.07491	0.25682	-4.08401
YDL226C	GCS1	-0.330079	-0.529872	-0.194052	-0.616059	0.246245	-0.386962	-0.376975	-0.114353	-0.539041	-0.839874
YDL225W	SHS1	0.29227	0.187824	-0.0873303	0.621059	0.261833	0.46313	0.0265731	-0.230571	0.106274	-0.496386
YDL224C	WHI4	0.501628	0.498443	-0.0322948	0.119837	-0.34988	-0.0723973	0.310918	-0.345295	0.294663	-0.0518399
YDL223C	HBT1	0.531521	0.48104	0.0165779	1.66807	0.629106	0.643479	0.629202	0.879736	0.378231	1.41456
YDL222C	FMP45	-0.600599	-1.10929	-0.102921	1.70412	0.347173	0.991591	0.140297	1.45622	-0.24108	-0.581073
YDL220C	CDC13	0.428917	-0.0968601	-0.46844	-0.364481	-0.143957	-0.32188	0.407308	-0.163738	-0.0536098	0.0594729
YDL219W	DTD1	-0.190994	-1.02294	0.0284137	-0.681056	0.107309	-0.934285	-0.758891	-0.269083	-0.711749	-0.717799
YDL218W	YDL218W	-0.789528	-0.279134	0.409666	-0.674519	-0.265664	-0.812418	-0.519882	-0.259	-0.104519	0.839668
YDL217C	TIM22	-0.434319	-0.500333	0.319747	-0.286662	0.233846	-0.339869	-0.53279	-0.0665463	-0.136432	0.0420645
YDL216C	RRI1	-0.219945	-0.140059	-0.0670461	0.934107	0.545386	0.134808	-0.774355	-0.702429	-0.333411	1.03601
YDL215C	GDH2	0.304727	0.361184	0.198937	1.46907	0.0363066	1.60392	0.66753	0.453394	0.26793	1.03388
YDL214C	PRR2	1.26528	0.551455	-0.158299	0.0518017	-0.0509577	0.226675	1.22159	0.35211	0.203993	0.786111
YDL213C	NOP6	-0.37249	-0.908727	-0.114625	-0.744702	-0.130448	-0.653777	-0.45422	-0.475462	-0.638484	-0.670095
YDL212W	SHR3	-0.293051	-0.73773	0.0455168	-0.998446	0.0324093	-0.833984	-0.478015	-0.376581	-0.490415	-1.27138
YDL211C	YDL211C	-0.0197081	-0.168518	-0.326875	-0.539844	-0.339899	0.162657	-0.473603	-0.89404	-0.101477	-0.763813
YDL210W	UGA4	-0.0106412	-2.16828	0.0169933	-1.40018	1.24383	-0.0884525	-0.306606	0.624789	0.0414918	-0.971529
YDL209C	CWC2	-0.591279	-0.085953	-0.371676	-0.551706	-0.418955	-0.354496	-0.941653	-0.829987	-0.540723	-0.966246
YDL208W	NHP2	-0.570679	-1.23955	0.00265451	-0.901259	0.270984	-0.595201	-0.797212	-0.850456	-0.727044	-1.16343
YDL207W	GLE1	-0.187295	-0.249752	-0.0690424	0.0996416	0.189782	-0.0082067	0.0198261	-0.00241159	0.0985875	-0.0767857
YDL206W	YDL206W	0.233385	0.496983	-0.1704	-0.246165	-0.062025	-0.421007	0.665485	0.260344	0.561762	-0.337675
YDL205C	HEM3	0.59348	-0.107407	0.289092	-1.19795	0.285622	-0.435414	0.193238	-0.670284	0.00721057	0.529261
YDL204W	RTN2	-0.534656	0.4505	-0.0986414	0.623197	0.717532	0.909366	0.805165	0.823216	-0.100479	1.59628
YDL203C	ACK1	0.143273	0.12594	-0.0302772	-0.502298	-0.0815668	-0.57493	0.333499	-0.499082	0.0583551	0.13064
YDL202W	MRPL11	-0.113323	-0.192854	0.186179	-0.328092	1.0449	0.564215	-0.643885	-0.157043	-0.477725	0.227526
YDL201W	TRM8	-0.475397	-0.748225	0.117531	-1.16206	-0.673297	-0.31699	-0.372596	-0.601513	-0.249846	-1.15091
YDL200C	MGT1	-0.301952	-0.307271	-0.0612504	-0.819457	0.389073	-0.768535	-0.726411	0.190464	-0.444098	-0.898025
YDL199C	YDL199C	0.370099	0.68107	-0.15012	0.380343	0.341171	0.909461	-0.477197	0.997561	0.330898	-0.532508
YDL198C	GGC1	-1.47028	-1.21989	-0.0176058	-1.25178	-0.0811128	-0.359271	-1.20287	-0.253744	-0.590064	-0.545281
YDL197C	ASF2	-0.0306281	0.241869	-0.448583	0.269827	-0.272647	0.108096	-0.413098	-0.3618	-0.199845	0.856244
YDL195W	SEC31	0.652047	-0.0523464	-0.769508	-0.690837	-1.107	-0.55881	0.33017	-0.79549	0.379857	-1.3962
YDL194W	SNF3	0.376412	0.581357	-0.243482	-0.461185	-0.00855518	0.152392	-0.0890504	-0.133404	0.224651	-0.588529
YDL193W	NUS1	0.0927657	0.032459	-0.18426	-0.570743	-0.58649	-0.142812	-0.231503	-0.170386	0.133887	-0.58348
YDL192W	ARF1	-0.766201	-1.25479	0.0595092	-0.828928	0.110833	-0.693728	-0.580275	-0.455753	-0.498471	-1.5287
YDL191W	RPL35A	-0.857847	-1.25401	0.437315	-0.927639	-0.142174	-0.393389	-0.817982	-0.388557	-0.705931	-1.43021
YDL190C	UFD2	0.437178	0.274464	-0.266939	-0.238574	-0.772995	-0.111813	0.526067	0.0586427	0.656134	-0.131029
YDL189W	RBS1	-0.368091	-0.857914	-0.157314	0.0405754	-0.00318842	-0.0954894	-0.243354	-0.0977484	-0.401735	-0.129856
YDL188C	PPH22	0.276204	0.139504	0.0819543	-0.183096	-0.0178319	-0.495531	-0.170092	-0.089706	-0.058922	-0.702342
YDL186W	YDL186W	-0.648516	-0.891893	0.259421	-0.25754	-0.117934	-0.61853	-0.397395	0.148685	-0.525379	-0.74558
YDL185W	VMA1	-0.0021491	-0.181252	0.0319291	-0.783151	-0.639399	-0.390475	0.225029	-0.658018	0.283624	-1.30336
YDL184C	RPL41A	-2.7915	-1.12967	0.81511	-0.0380854	-1.62313	-0.783305	-1.2416	0.856274	-1.85505	-0.424393
YDL183C	YDL183C	0.236382	0.0583325	0.521315	0.128642	0.642087	1.33807	0.893667	0.638576	0.245157	0.28087
YDL182W	LYS20	-0.172013	-0.474005	0.240239	-0.497008	-0.914044	-0.59344	0.351054	0.335431	0.0444134	-0.801995
YDL181W	INH1	2.51451	0.654572	-0.0460331	1.30564	0.236803	2.99044	-0.713376	0.00348611	1.20102	0.713801
YDL180W	YDL180W	0.339294	0.197392	0.130967	-0.458329	-0.520914	-0.237892	0.303278	-0.173398	0.349563	-0.180894
YDL179W	PCL9	0.224498	0.787409	0.34946	0.913831	-0.427633	0.997396	-0.0571788	-0.212678	0.161408	0.131253
YDL178W	DLD2	0.0984278	0.144484	0.293596	-0.594167	0.0164	0.24272	0.0149135	-0.246975	0.262041	-0.221
YDL177C	YDL177C	-0.228974	0.0423859	0.412208	-0.455789	0.46242	0.0265425	-0.550999	0.464004	-0.893461	0.816336
YDL176W	YDL176W	-0.37974	0.368004	-0.0971599	-0.296669	0.214207	-0.612195	0.109061	-0.0874512	0.0635436	0.482866
YDL175C	AIR2	-0.556383	-0.143043	0.163162	0.954863	-0.0951121	0.302359	0.529835	0.46894	-0.197882	0.800386
YDL174C	DLD1	0.3928	0.347779	-0.411902	0.145021	0.134816	0.437543	-0.167198	-0.0794107	0.103183	-0.18186
YDL173W	PAR32	-0.346921	-0.0653228	0.214517	0.00336642	0.681651	-0.157219	-0.77148	-0.109903	-0.489552	-0.328447
YDL171C	GLT1	0.542936	0.055686	0.0440947	-1.49856	-1.63902	-0.695476	1.15181	-0.187706	0.33602	-1.03362
YDL170W	UGA3	-0.0843021	0.480176	-0.208395	0.00354411	0.498419	-0.392025	0.252234	0.709983	-0.0732067	1.31633
YDL169C	UGX2	-0.107104	0.84137	0.713456	3.07599	3.17716	2.79056	-0.451785	1.07514	-0.571645	0.818358
YDL168W	SFA1	-0.123668	-0.376787	0.149594	-0.503867	-0.170038	-0.543465	0.26471	-0.159196	-0.153294	-1.17278
YDL167C	NRP1	0.293029	0.0583078	-0.197846	-0.803164	-0.734227	-0.301227	0.297878	-0.76109	0.0734365	-0.415165
YDL166C	FAP7	-0.286053	-0.768411	-0.0328455	-0.680496	0.0174003	-0.419167	-0.679823	-0.389989	-0.767396	-1.07955
YDL165W	CDC36	-0.245217	-0.202769	0.0523083	0.441961	0.461403	-0.512894	-0.379624	-0.278695	-0.591578	-0.412674
YDL164C	CDC9	0.524081	0.320673	-0.0985082	-0.0753252	-0.224981	0.548978	0.333074	-0.0603199	0.4456	0.215102
YDL161W	ENT1	0.466015	0.316762	0.0465914	0.810913	0.118131	0.287619	0.00641832	-0.462734	0.263716	0.0378004
YDL160C-A	YDL160C-A	-1.08196	-1.03476	0.341893	-0.326782	0.116097	-0.117784	-1.00643	0.209495	-1.1514	-0.528912
YDL160C	DHH1	1.04212	0.29278	-0.436455	-0.0885935	-0.16571	-0.284645	0.000346668	-1.31022	0.182517	1.32192
YDL159W-A	YDL159W-A	-0.532876	-0.977677	0.11435	-0.165356	-0.107129	-0.488593	-0.641394	-0.153016	-0.406918	-1.34396
YDL159W	STE7	0.015756	0.181625	-0.115958	0.327903	0.192726	0.901419	0.13607	0.281835	-0.049958	-0.618407
YDL157C	YDL157C	-0.372719	-1.01724	0.232011	-0.80088	-0.0754312	-0.931701	-0.43092	-0.0490687	-0.428628	-1.29678
YDL156W	YDL156W	0.172412	-0.471474	-0.260775	-0.198656	0.266361	0.123418	-0.196767	0.143739	-0.136474	0.53566
YDL155W	CLB3	0.250678	-0.235887	-0.490897	-0.302035	-0.200902	-0.198196	-0.289997	-0.437366	0.0286275	-0.613317
YDL154W	MSH5	-0.980615	-0.622556	-0.233569	-0.414182	0.136668	-0.303423	-0.746128	-1.84905	-0.668997	0.645491
YDL153C	SAS10	0.0765508	-0.0213936	-0.261725	-0.536238	-1.21	-0.67775	0.17765	-0.964722	-0.039518	-1.10149
YDL150W	RPC53	-0.0453426	-0.126134	-0.237393	-0.421704	-1.07179	-0.45909	-0.128336	-0.0984772	-0.510355	-0.16719
YDL149W	ATG9	0.176847	0.652941	-0.0676493	0.441786	0.471571	0.175323	0.414298	-0.10872	0.241906	-0.45433
YDL148C	NOP14	0.102354	0.283711	-0.489893	-0.0350541	-1.28412	-0.383373	0.506719	-0.871922	0.30377	-1.08033
YDL147W	RPN5	-0.00304094	0.195239	0.255552	0.280431	-0.0134958	0.0688695	-0.0903273	-0.146983	-0.114377	-0.210968
YDL146W	LDB17	-0.143004	-0.400816	-0.312269	-0.368218	-0.0465786	-0.473653	-0.567516	0.454512	0.00573459	-0.231638
YDL145C	COP1	0.00510468	-0.0273552	-0.0619851	-0.72701	-0.64232	-0.443563	0.207571	-0.799199	0.315439	-1.31512
YDL144C	YDL144C	0.0987823	-0.563162	-0.0538902	-0.19697	0.24092	0.100223	-0.726163	-0.292585	-0.278633	-0.647875
YDL143W	CCT4	-0.283315	-0.46047	0.188636	-0.581516	-0.240668	-0.373013	-0.218355	-0.30655	-0.160794	-1.21442
YDL142C	CRD1	0.388224	0.168544	0.26205	0.77668	0.542556	0.579355	-0.423391	0.098845	-0.474452	0.706984
YDL141W	BPL1	0.320296	0.335844	-0.128134	-0.768426	-0.0327388	-0.152078	0.199004	-0.272099	0.341391	-0.792525
YDL140C	RPO21	0.768603	-0.0804367	0.139047	-1.02086	-1.48672	-0.481566	-0.0573482	-0.556915	0.278582	-0.839745
YDL139C	SCM3	-0.126723	0.16699	0.464183	0.918382	0.166399	0.6939	0.00960417	0.289156	-0.497762	1.07363
YDL138W	RGT2	0.548276	0.50897	-0.0519366	0.0021878	-0.483103	-0.705807	0.60274	0.607399	0.377073	-0.476465
YDL137W	ARF2	-0.517914	-0.500662	0.185216	-0.289085	0.38082	-0.451022	-1.02234	-0.334012	-0.182119	-1.33276
YDL135C	RDI1	-0.521234	-0.955732	0.00585599	-0.209969	0.335906	-0.529431	-0.580721	0.124778	-0.493144	-0.724564
YDL134C	PPH21	0.168202	-0.0724011	-0.052932	-0.163637	-0.51421	-0.401432	-0.346428	0.0601664	-0.218397	-0.155979
YDL133W	YDL133W	-0.853212	-0.62042	-0.335274	-0.226255	-0.174502	-0.521505	-0.780366	-0.115523	-0.506368	0.0946916
YDL132W	CDC53	0.245027	0.527956	0.170242	0.0391939	-0.439542	-0.169164	0.362675	-0.254598	0.319709	-0.322684
YDL131W	LYS21	-0.372416	-0.379203	-0.174047	-0.155747	-1.07225	-0.811351	0.039625	0.214244	-0.149712	-0.758796
YDL130W-A	STF1	0.57507	0.539093	0.61713	2.15407	1.58979	1.84941	-0.770744	1.66732	-0.110328	0.434935
YDL130W	RPP1B	-0.69492	-1.35921	0.408759	-0.905334	-0.0376032	-0.355173	-0.683769	-0.399805	-0.56783	-1.5692
YDL129W	YDL129W	0.513695	-0.469928	-0.212228	-0.879533	-0.729057	-0.240976	-0.22618	-0.47845	-0.733389	1.44073
YDL128W	VCX1	0.977455	1.07094	0.196038	-0.479628	-0.573814	0.0119324	0.657809	-0.572054	0.760406	-0.347618
YDL127W	PCL2	-0.234898	0.0264558	0.0699101	0.659179	-0.0535871	0.866465	0.241805	-0.183638	0.313873	-0.268924
YDL126C	CDC48	0.00405203	0.0073779	0.0661768	-0.268624	-0.398463	-0.0656282	0.187683	-0.475522	0.260673	-1.08873
YDL125C	HNT1	-0.843102	-0.631985	0.273285	-0.746598	-0.0641209	-0.284535	-0.550098	-0.103289	-0.580791	-0.594739
YDL124W	YDL124W	0.474182	0.641706	0.432034	0.375165	0.201463	0.626493	-0.320373	1.12056	-0.0120245	-0.15912
YDL123W	SNA4	-0.268791	0.196422	0.171011	0.210208	0.782811	-0.712783	0.193329	0.461327	-0.148856	0.754869
YDL122W	UBP1	0.362886	0.124989	-0.2691	-0.5432	-0.847358	-0.70811	0.33517	-0.877797	0.320594	-1.03398
YDL121C	YDL121C	-1.05998	-0.857407	-0.0103826	-1.09546	-0.411032	-1.56177	-0.689312	-0.202399	-0.970741	-0.704474
YDL120W	YFH1	-0.589376	-0.658653	-0.025437	-0.190988	0.336799	-0.0730908	-0.147139	0.0863303	-0.809124	-0.671533
YDL119C	YDL119C	0.0290449	-0.0474371	0.344459	1.21024	0.500971	0.902122	-0.274677	0.331227	-0.344525	0.188518
YDL117W	CYK3	0.289664	0.595955	0.0619503	0.330489	-0.5078	-0.239045	0.384905	-0.324765	0.192386	-0.780877
YDL116W	NUP84	0.0188655	-0.0174093	-0.281397	0.571542	-0.261562	-0.0746953	-0.151766	-0.587429	0.0450391	-0.715491
YDL115C	IWR1	-0.812388	0.482307	0.368056	0.892117	0.366808	0.286747	0.0395855	0.146217	0.0356659	0.794094
YDL114W	YDL114W	-0.749127	-0.635396	0.421146	-0.0624618	0.0153893	-0.276456	-0.203215	0.137244	-0.529357	-1.03646
YDL113C	ATG20	-0.515319	0.516155	0.282326	1.22125	0.622232	0.802414	0.0726463	0.655056	0.037627	1.02274
YDL112W	TRM3	-0.0917094	-0.176649	-0.0194441	-1.08445	-0.885571	-0.746822	0.210757	-0.917694	0.171338	-1.0566
YDL111C	RRP42	-0.380962	-0.483027	-0.00407235	-0.301755	-0.318059	-0.275859	-0.450017	-0.301927	-0.728897	-0.665036
YDL110C	TMA17	-0.0231241	0.896521	0.842549	0.870908	0.926289	1.05721	0.0247193	1.09147	0.242089	0.996083
YDL109C	YDL109C	-0.216686	-0.384178	-0.491602	0.135674	-0.162988	-0.622315	0.354996	-0.627727	-0.441678	0.781864
YDL108W	KIN28	-0.214225	-0.132208	0.123993	0.338298	0.0260523	-0.202432	-0.0233908	0.273507	-0.330839	0.517588
YDL107W	MSS2	-0.614605	-0.362764	0.178204	-0.104924	0.644056	0.244162	-0.662897	0.456642	-0.406243	0.268753
YDL106C	PHO2	0.323848	0.910933	0.270053	1.04659	-0.357837	0.609915	0.0062463	-0.0775766	0.301588	0.0605419
YDL105W	NSE4	-0.204482	-0.106759	0.0333177	0.44592	0.350032	-0.0645932	-1.12285	-1.11131	-0.518281	1.10595
YDL104C	QRI7	0.109467	-0.0159264	0.0476647	-0.598554	0.645129	0.242292	-0.47469	-0.610802	-0.183154	1.29172
YDL103C	QRI1	0.0560038	0.223598	-0.0459138	0.44813	0.235907	0.00202765	-0.137735	-0.0928345	-0.124305	-0.703093
YDL102W	POL3	0.0510017	0.292442	-0.254862	0.294944	-0.352755	-0.080386	0.48235	-0.8813	0.449778	-1.14275
YDL101C	DUN1	-0.167413	0.172802	-0.204136	0.484683	0.158867	0.226277	-0.111305	-0.170897	0.196042	-0.194613
YDL100C	GET3	-0.27753	-0.642149	-0.00140421	-0.651584	0.0696912	-0.782963	-0.392075	-0.358373	-0.265245	-1.17873
YDL099W	BUG1	0.216785	0.614589	-0.0634392	0.582669	-0.0370031	0.0417476	0.26523	-0.0963637	0.101025	-0.242142
YDL098C	SNU23	-0.868958	-1.17342	0.00598052	-0.750432	0.368846	-0.189161	-0.557359	-0.227037	-0.695533	-0.578401
YDL097C	RPN6	-0.597782	0.0786715	0.125509	0.138253	-0.219768	-0.217528	-0.0900438	-0.0925134	-0.048325	-0.649847
YDL095W	PMT1	0.79028	0.57415	-0.318573	-1.02826	-0.237565	-0.51077	0.794539	-0.848183	1.07486	-1.33357
YDL093W	PMT5	0.935644	0.735454	-0.417783	-1.42583	0.0876045	-0.856906	1.1424	-0.803356	1.16924	-0.580307
YDL092W	SRP14	-1.11754	-1.0511	-0.190627	-0.0967255	0.23647	-0.0992171	-0.754572	-0.268956	-1.10891	-0.91645
YDL091C	UBX3	0.233668	0.680887	-0.121467	0.567291	0.392913	0.368722	0.227652	-0.113564	0.67396	-0.097994
YDL090C	RAM1	0.0455116	-0.429593	-0.0822353	-0.940276	0.14149	-0.245782	-0.435228	-0.80536	-0.170769	-0.307743
YDL089W	NUR1	0.0995706	0.253005	-0.042693	-1.30226	-0.348957	-0.295977	0.179408	-0.0208096	0.157537	-0.735949
YDL088C	ASM4	0.401135	0.293572	-0.0150343	0.36781	-0.0555027	-0.00504724	0.359332	-0.203698	0.257534	0.0316537
YDL087C	LUC7	-0.0927223	-1.00833	0.255175	-0.00726086	0.402976	-0.209576	-0.670478	-0.077667	-0.641187	0.398882
YDL086W	YDL086W	0.117603	-0.216635	0.269222	-0.341901	0.949744	-0.316807	-0.518068	0.117893	-0.309592	-0.304223
YDL085W	NDE2	0.125222	-0.375942	0.225173	0.402479	1.42891	0.803245	-0.606571	-0.234172	0.0805053	-0.881073
YDL085C-A	YDL085C-A	-1.74269	-0.753903	0.42214	-0.928454	0.00748169	-1.09289	-1.15461	-0.398072	-1.27987	-0.12618
YDL084W	SUB2	-0.520447	-0.967888	-0.0434817	-1.15753	-0.177338	-0.829977	-0.536626	-0.47614	-0.277533	-1.50993
YDL083C	RPS16B	-0.866466	-1.26017	0.459695	-0.914429	-0.201788	-0.298913	-0.741204	-0.427152	-0.573034	-1.43189
YDL082W	RPL13A	-0.86236	-1.38694	0.233423	-1.33356	-0.47951	-0.429347	-0.792251	-0.538212	-0.83733	-1.411
YDL081C	RPP1A	-1.27207	-1.38105	0.506353	-0.868082	-0.123492	-0.514107	-0.724689	-0.343132	-0.496644	-1.42201
YDL080C	THI3	-0.101462	-0.431128	-0.101726	0.27962	0.293029	0.0891495	0.000354537	0.251224	-0.289353	0.745992
YDL079C	MRK1	0.765351	-0.0492191	-0.0763939	-0.552037	0.345933	1.22235	0.755872	0.963263	0.0197432	-0.401556
YDL078C	MDH3	-0.287047	-0.368077	-0.015401	-0.533685	0.441001	-0.399579	-0.565088	-0.0267129	-0.337233	-1.03844
YDL077C	VAM6	0.051503	-0.0106896	0.0480856	-0.373677	-0.230892	-0.0610925	0.0951108	-0.183173	0.115664	0.13626
YDL076C	RXT3	0.16355	-0.165021	0.344147	0.107666	0.237828	-0.115098	-0.429356	0.0138693	-0.273511	0.243525
YDL075W	RPL31A	-0.823025	-1.19031	0.492347	-0.861355	-0.160812	-0.481496	-0.575942	-0.390699	-0.467005	-1.42879
YDL074C	BRE1	0.0895996	-0.0399575	-0.203735	-0.49648	-0.346159	-0.0240663	-0.154396	-0.58245	-0.230999	-0.885785
YDL073W	YDL073W	-0.0959137	0.194083	-0.0157446	-0.480905	-0.260946	-0.886765	0.39382	-0.267388	0.356281	0.10964
YDL072C	YET3	-0.121382	0.663043	0.124777	0.373166	0.470852	0.206614	-0.733395	0.36718	-0.473098	-0.113962
YDL070W	BDF2	-0.501406	-0.122112	-0.451053	-0.749159	0.340164	-1.0137	-0.420331	-0.444516	-0.081701	0.0178725
YDL069C	CBS1	-0.276162	-0.43414	-0.302009	-0.67828	0.267628	-0.205056	-0.471688	0.261229	-0.654673	0.232624
YDL067C	COX9	-0.0828227	-0.458941	-0.288724	-0.486207	0.0838978	0.297675	-0.747842	-0.478385	-0.499597	-0.669115
YDL066W	IDP1	0.10819	-0.361592	0.115144	-0.95008	0.15507	-0.632423	-0.487836	0.37328	-0.275171	-0.554407
YDL065C	PEX19	0.0760425	0.209391	-0.0526137	0.0677221	0.379339	-0.507783	-0.195155	-0.0848856	0.038834	-0.1554
YDL064W	UBC9	-0.792915	-0.951734	-0.111733	-0.765047	-0.167172	-0.433082	-0.643267	-0.569374	-0.590406	-1.43013
YDL063C	YDL063C	-0.302413	-0.104963	0.0883736	-0.862471	-0.79643	-0.467991	0.407765	-0.616989	-0.0712033	-0.875343
YDL061C	RPS29B	-1.1596	-1.24344	0.366459	-0.761678	-0.0963579	-0.417713	-0.740962	-0.343908	-0.716862	-1.40991
YDL060W	TSR1	0.179876	-0.169159	-0.180209	-0.617031	-0.781367	-0.264654	0.286923	-0.783864	0.135169	-1.06797
YDL059C	RAD59	-0.578353	-1.12596	0.112291	-0.205602	0.227268	0.040537	-0.0871464	0.535031	-0.363903	0.813612
YDL058W	USO1	0.223346	0.401984	0.0555105	-0.0719817	-0.756071	0.207982	0.461707	-0.423174	0.575646	-0.824706
YDL057W	YDL057W	-0.211702	-0.842224	0.30553	0.976287	0.472039	-0.001842	-0.743176	0.258677	-0.533418	0.537021
YDL056W	MBP1	-0.506871	0.395925	-0.42225	0.490814	-0.633008	-0.278251	0.0842744	-0.453058	0.318557	-0.838072
YDL055C	PSA1	-0.619789	-1.25336	-0.0174077	-1.10613	-0.128746	-0.266942	-0.73614	-0.560153	-0.548289	-1.08741
YDL054C	MCH1	0.454133	0.950148	-0.185826	-0.72762	-0.398559	-0.0936157	0.555165	-0.364095	0.48899	-0.0795215
YDL053C	PBP4	-0.102605	-0.275582	0.141941	-0.015545	0.464502	-0.495008	-0.669721	-0.0279786	-0.862002	-0.315347
YDL052C	SLC1	0.293193	-0.0246135	0.154748	-1.06389	0.477967	-0.0849648	0.0233972	0.253314	-0.0393734	-0.697396
YDL051W	LHP1	-0.732534	-1.22299	-0.0980425	-1.07384	-0.332673	-0.846358	-0.560111	-0.440403	-0.737469	-1.18982
YDL049C	KNH1	-0.391992	-1.1827	0.123201	-0.734429	-0.082583	0.0629581	-0.546825	0.129906	-0.294202	0.587253
YDL048C	STP4	2.21779	-0.893432	-0.590263	1.31705	-0.4765	1.22621	1.46407	0.839324	0.877354	0.517146
YDL047W	SIT4	0.0195893	-0.113035	-0.249693	-0.49387	-0.301716	-0.284154	-0.0602705	0.0187372	-0.21449	-0.0104738
YDL046W	NPC2	0.534141	0.216643	0.248584	-0.0779452	-0.156128	0.187407	-0.0732416	-0.0184372	-0.0239741	-0.701049
YDL045W-A	MRP10	-0.359367	-0.441158	0.222686	-0.656771	0.478321	0.322012	-0.364666	0.323699	-0.301017	-0.755861
YDL045C	FAD1	0.234312	0.248861	0.105884	0.291674	0.191006	0.148156	-0.0231682	0.216213	0.100002	0.366824
YDL044C	MTF2	0.145376	0.0737127	0.133267	0.00247688	0.0650169	0.413965	-0.084501	-0.163687	0.0135838	0.17973
YDL043C	PRP11	0.0267274	-0.0747135	-0.0210546	-0.117813	-0.15143	0.0904238	-0.132725	-0.686672	-0.545681	0.154558
YDL042C	SIR2	0.00168505	-0.834936	-0.117605	-0.510288	-0.529702	-0.140523	-0.0765564	-0.784237	-0.218552	-0.287102
YDL040C	NAT1	0.209654	-0.0819618	-0.238008	-0.134832	0.00496366	-0.662658	0.0676011	-0.594324	0.367356	-0.856766
YDL039C	PRM7	-2.10289	-2.10601	-0.913745	-3.1386	-3.07497	-3.7322	2.20952	-2.47347	0.48406	-0.0306562
YDL037C	BSC1	-0.733104	-0.91973	0.310657	-0.270877	-0.0838218	-0.509847	-0.334693	-0.0984407	-0.327124	-1.3579
YDL036C	PUS9	0.129363	-0.309143	-0.113124	-0.233902	-0.641522	-0.392589	-0.127294	-0.453203	-0.06044	-0.652477
YDL035C	GPR1	-0.0545263	0.292467	-0.0155468	-0.191147	-0.52266	-0.643225	0.310575	-0.0760422	0.531936	-1.1918
YDL033C	SLM3	-0.102198	-0.00210936	0.236914	0.0119554	0.0876939	0.425308	0.0636031	0.439598	-0.430349	1.23151
YDL031W	DBP10	-0.0170883	-0.375666	-0.223687	-0.877252	-0.80434	-0.22866	0.124678	-0.508693	-0.0674476	-1.0519
YDL030W	PRP9	0.10306	-0.0871304	0.0903139	-0.14884	-0.0654278	-0.114951	0.062892	-0.24869	-0.187786	-0.0284844
YDL029W	ARP2	-0.128019	-0.386104	-0.167828	-0.0263868	0.329109	-0.464346	-0.51395	-0.270553	-0.382667	-0.894864
YDL028C	MPS1	-0.0445001	0.124177	-0.198597	-0.484662	-0.487058	-0.316873	-0.0169286	-0.597054	0.118687	-0.652927
YDL027C	YDL027C	0.109241	0.319754	-0.0161662	0.239763	0.316933	0.688183	-0.185538	0.0624247	0.0713079	0.0481201
YDL025C	RTK1	0.617265	0.569494	0.00601354	0.778215	0.666589	0.588233	0.347178	0.405974	0.603021	0.339606
YDL024C	DIA3	0.629205	-1.30995	0.255073	-0.399585	1.78168	0.656525	0.600597	0.791217	-0.097974	0.912071
YDL022W	GPD1	0.143601	-0.00227758	-0.211809	0.750163	0.579038	1.00372	-0.947728	0.510667	0.10136	-0.781084
YDL021W	GPM2	0.576678	0.329293	0.118279	2.58148	1.33501	1.86814	-0.592366	2.21871	-0.18458	-0.598182
YDL020C	RPN4	-0.294302	-0.16413	-0.121319	0.0757937	-0.247393	0.107998	0.284133	-0.224381	-0.0273268	-0.75684
YDL019C	OSH2	0.609977	0.969215	-0.0509702	-0.725578	-0.596926	0.506265	0.50716	0.323138	0.619883	-0.178894
YDL018C	ERP3	-0.341671	-0.61767	-0.177051	-0.00674082	0.138171	-0.253636	-0.732475	-0.1823	-0.443385	-0.227791
YDL017W	CDC7	-0.0459645	-0.155046	-0.158073	0.0711782	-0.447059	0.586945	-0.456902	-0.302343	-0.279242	-0.249733
YDL015C	TSC13	0.110417	-0.125016	0.000655922	-0.611516	-0.0670277	-0.477809	0.0538037	-0.212727	0.11315	-0.632583
YDL014W	NOP1	-0.410162	-1.08097	0.059428	-1.36367	-0.257144	-0.594093	-0.360533	-0.7484	-0.435066	-1.19607
YDL013W	SLX5	-0.446052	-0.607302	-0.408183	-0.238	-0.542203	-0.645555	-0.169177	-0.0185654	-0.265744	-0.493706
YDL012C	YDL012C	-1.22313	-0.360733	-0.00855411	-0.0829484	0.28008	-0.377463	-0.483078	-0.416962	-0.651328	-0.849209
YDL010W	GRX6	0.0514521	0.309603	-0.241095	0.192352	0.242639	-0.288036	0.023779	0.627201	-0.0862025	0.472355
YDL008W	APC11	-0.818445	-1.22363	0.129101	0.174383	0.566853	0.326745	-0.678967	-0.0438253	-0.93518	-0.345432
YDL007W	RPT2	-0.232385	-0.124746	0.102078	0.493593	-0.475977	-0.11641	-0.1435	-0.107451	-0.093297	-0.984904
YDL006W	PTC1	0.092946	0.167284	0.268274	0.0348044	0.106724	0.309078	0.362691	0.284326	-0.169782	0.494943
YDL005C	MED2	0.805856	0.214611	0.166093	0.579236	-0.354393	0.0825757	0.0584147	-0.535814	-0.0891822	0.171564
YDL004W	ATP16	-0.157097	-0.537332	0.0148844	-0.317816	-0.0242466	0.606564	-0.789619	-0.303406	-0.526235	-0.811517
YDL003W	MCD1	-0.0247167	0.0428022	-0.404197	0.589905	-0.546902	0.157008	-0.675789	-0.946953	-0.00737414	-0.511345
YDL002C	NHP10	-0.611922	-0.387197	0.0224875	0.243625	0.245158	0.112234	-0.368816	-0.0843189	-0.630789	-0.0520784
YDL001W	RMD1	-0.472385	0.102345	-0.138219	0.276911	0.0194517	-0.177699	-0.249314	-0.609454	-0.15638	0.412089
YDR001C	NTH1	0.705924	1.07246	-0.207717	1.9183	0.0334053	0.850417	0.271122	0.232816	0.642041	0.184701
YDR002W	YRB1	-0.669879	-1.05368	0.0442655	-0.964822	0.0265625	-0.989188	-0.746506	-0.625874	-0.699304	-1.2389
YDR003W	RCR2	-0.0942642	-0.332075	0.230842	0.0841569	0.420242	0.159819	-0.170007	-0.0273498	-0.144156	0.0813279
YDR003W-A	YDR003W-A	-0.497906	0.0367301	0.0875404	0.322505	0.301589	-0.214894	0.0180131	0.305271	0.424578	-0.032624
YDR004W	RAD57	-0.497035	0.13297	0.218776	-0.544214	0.412933	-0.243899	-0.221112	0.328839	-0.312763	1.32698
YDR005C	MAF1	0.357546	0.148824	0.0583157	-0.167312	0.216405	-0.0903141	-0.0253288	0.117453	0.0577867	0.460862
YDR006C	SOK1	0.433955	0.365468	-0.0946488	0.451003	-0.698924	0.00488939	0.497022	-0.408069	0.22916	-0.929277
YDR009W	GAL3	1.48329	-1.03644	0.240481	2.33045	1.00797	1.9443	0.560334	0.111178	-0.0458725	0.993457
YDR011W	SNQ2	0.581431	0.521583	0.0750327	-1.09114	0.103393	-0.684043	1.30413	-0.739598	0.952514	-0.933633
YDR012W	RPL4B	-0.633035	-0.861022	0.368423	-1.27266	-0.753826	-0.377296	-0.53791	-0.450603	-0.218602	-0.872688
YDR013W	PSF1	-0.338253	-0.279108	-0.324924	-0.0965968	0.428251	-0.415045	-0.52055	0.0592485	-0.70012	0.375934
YDR014W	RAD61	0.39462	0.0206354	0.0201605	0.350974	0.126562	0.0698429	0.00147135	-0.661532	0.00803576	0.290106
YDR016C	DAD1	-1.14885	-1.43605	-0.119283	-0.905568	-0.00755242	-0.849045	-1.44544	-0.120728	-1.02799	-0.106152
YDR017C	KCS1	-0.000721326	0.407041	-0.0732208	0.11952	-0.582416	-0.478048	0.0867919	-0.112136	-0.00346093	-0.0593857
YDR018C	YDR018C	-0.398077	-0.44214	0.146586	0.486645	0.807398	1.85107	-0.70579	0.0489189	-0.384895	1.68168
YDR019C	GCV1	0.892549	0.617253	0.610418	-0.0814169	0.0860526	-0.797645	0.70256	0.81575	0.345699	1.264
YDR020C	DAS2	-0.0168003	-0.53379	0.0770457	-0.767045	-0.524001	-0.508272	-0.436276	-0.332241	-0.599598	0.686564
YDR021W	FAL1	-0.16816	-0.306592	-0.0869806	-0.554254	-0.747691	-0.668673	0.0804024	-0.506892	-0.242264	-0.15472
YDR022C	CIS1	-0.965631	-0.942326	0.29004	-0.51443	1.02107	-0.159248	-0.718495	0.658406	-0.430165	0.660862
YDR023W	SES1	-0.595887	-0.91245	-0.105958	-0.941511	-0.357156	-0.561942	-0.578122	-0.471331	-0.548995	-1.29477
YDR025W	RPS11A	-0.820188	-1.37567	-0.00472682	-0.760826	-0.221427	-0.449644	-0.739335	-0.493993	-0.597653	-1.46623
YDR026C	YDR026C	-0.0686804	-0.109995	-0.135858	-0.59099	-0.110704	-0.380669	0.115968	0.111972	-0.158387	0.582412
YDR027C	VPS54	0.217736	0.322908	0.0464455	-0.434822	-0.24374	0.0964557	-0.0106997	-0.238033	0.0965374	-0.531475
YDR028C	REG1	0.0765678	0.3883	-0.16569	0.0842581	-0.682061	-0.223204	0.184014	-0.458631	0.363252	-0.248268
YDR030C	RAD28	0.660218	0.0845295	0.0812532	0.764896	0.617841	-0.544131	0.144755	-0.423181	0.110146	0.236722
YDR031W	MIC14	-0.385205	0.138208	0.173424	1.00152	0.797159	0.678527	-0.731547	0.49667	-0.713717	0.0530229
YDR032C	PST2	0.153824	-0.116485	0.229306	0.303239	0.374937	0.0331188	-0.405743	0.387404	0.00812068	-0.82002
YDR033W	MRH1	0.992186	-0.0886391	-0.213669	-0.20392	-0.977624	-0.0705674	0.372368	-1.4417	0.725598	-0.687418
YDR034C	LYS14	0.0746441	0.332726	-0.0368708	-0.112592	-0.19054	-0.34283	0.393999	-0.0535379	0.0603864	0.154828
YDR034C-A	YDR034C-A	0.0668904	-1.89078	1.32482	-1.02244	1.82113	-0.0756278	-1.39779	1.99651	-1.34302	-1.0403
YDR034W-B	YDR034W-B	0.360329	0.602796	-0.488926	5.11443	1.64187	2.68539	-0.212619	2.57393	-0.600681	0.584339
YDR035W	ARO3	-0.370989	-0.609235	-0.018783	-0.270948	-0.304882	-0.294568	-0.122694	-0.0721349	-0.483985	-0.760596
YDR036C	EHD3	-0.102594	-0.00452192	0.242039	-0.0106173	0.341939	0.127001	-0.175145	-0.358248	0.154482	-0.598487
YDR037W	KRS1	-0.813599	-0.772257	0.0155935	-1.12128	-0.804171	-0.923467	-0.165286	-0.571729	-0.0859166	-1.17901
YDR038C	ENA5	0.184873	0.723668	0.110104	-0.294829	-0.502656	-0.00714844	0.886691	0.0509948	0.636741	0.23293
YDR041W	RSM10	-0.107077	-0.0444441	0.302869	0.207089	0.981637	0.65217	-0.636114	0.134603	-0.456661	0.120648
YDR042C	YDR042C	-0.439248	-0.413354	-0.826702	-0.292922	-0.261301	0.232264	2.16935	3.09309	-0.424802	-1.31158
YDR043C	NRG1	0.79383	0.298453	0.0296327	1.76267	0.226243	0.878833	0.533007	0.567962	-0.414939	1.64939
YDR044W	HEM13	-0.136048	-0.861494	-0.0630363	-1.53107	0.168922	-0.816676	-0.640986	-0.0857527	-0.839366	-0.803463
YDR045C	RPC11	-0.518913	-0.889278	0.092074	-0.793425	-0.215295	-1.0337	-0.332185	0.0613815	-0.616173	-0.298128
YDR046C	BAP3	0.68222	0.77145	-0.142846	-0.15676	-0.708921	0.82403	0.624409	-0.339527	0.546295	-0.775294
YDR047W	HEM12	-0.0569436	-0.329917	0.198089	-0.268765	0.163365	-0.0500214	-0.178907	-0.185101	-0.192627	0.00927002
YDR049W	VMS1	0.0546208	0.068135	-0.265582	-0.0755927	-0.205835	0.123852	0.382487	-0.0789856	0.17363	-0.371342
YDR050C	TPI1	-0.695153	-1.06289	0.5884	-0.85339	0.158159	-0.218909	-0.496164	-0.349388	-0.460805	-1.33918
YDR051C	DET1	0.21776	-0.223384	-0.12588	0.411201	-0.017782	-0.0643287	-0.337254	0.10022	-0.121772	-0.107257
YDR052C	DBF4	0.0278313	0.303008	-0.236748	-0.0417372	-0.748358	-0.237929	0.0150022	-0.177963	0.0542899	-0.612648
YDR054C	CDC34	0.456645	-0.045458	-0.0479724	-0.0357283	0.128014	0.220143	0.00246376	0.141457	-0.123034	0.484621
YDR055W	PST1	2.08098	2.03962	0.0379743	2.21451	0.816469	1.41312	0.765435	0.246164	1.261	0.118093
YDR056C	YDR056C	-0.377023	-0.63465	-0.520189	-0.646563	0.215745	-0.759916	-0.484373	-0.282254	-0.620445	-1.25908
YDR057W	YOS9	0.51484	1.00834	0.382469	0.174057	-0.156835	-0.0454679	0.764655	0.16422	0.568039	0.943574
YDR058C	TGL2	0.505009	0.228576	-0.238434	1.10142	1.97774	0.878495	-0.00730063	0.76519	-0.0536033	0.593022
YDR059C	UBC5	-0.646055	-0.234811	0.407738	1.45251	0.504974	1.7892	-0.197039	0.842156	-0.337063	-0.261292
YDR060W	MAK21	-0.0398994	-0.00381577	-0.46236	-0.816019	-1.11379	-0.492131	0.386222	-0.809202	0.444735	-0.803503
YDR061W	YDR061W	-0.645701	0.285843	0.220837	0.16546	0.299643	0.145022	-0.224989	0.265297	0.036413	-0.293357
YDR062W	LCB2	0.285354	-0.0763893	-0.204185	-1.17229	-0.610258	-0.468965	0.0701648	-0.765571	0.221168	-0.576244
YDR063W	AIM7	0.100877	-0.804756	-0.0668148	-0.392625	0.258003	-0.162685	-0.873967	-0.298365	-0.415702	-0.887826
YDR064W	RPS13	-0.705673	-1.29708	0.445273	-0.930283	0.00643305	-0.266861	-0.654059	-0.464993	-0.59868	-1.50079
YDR065W	RRG1	-0.100594	-0.406448	0.134306	-0.211812	0.2335	-0.135661	-0.12158	0.298922	-0.599819	1.39425
YDR066C	RTR2	-0.400716	-0.885932	0.220279	-0.175255	0.481746	-0.299911	-0.419291	-0.245042	-0.384668	-0.198346
YDR067C	OCA6	-0.367567	-0.173733	-0.0869489	0.659997	0.253378	-0.0403322	-0.562689	0.149774	-0.786407	0.55152
YDR068W	DOS2	0.281691	0.167035	0.0952641	-0.0558856	0.0444986	-0.321582	-0.217757	-0.736349	-0.101623	-0.270265
YDR069C	DOA4	0.324062	0.272895	0.0335219	-0.277807	-0.158822	-0.213517	0.185266	-0.0215218	0.425362	-0.434267
YDR070C	FMP16	-0.932268	-0.710449	-0.00228807	2.39604	1.14263	2.47763	0.100453	0.308765	0.0134262	0.328424
YDR071C	PAA1	-0.558348	-0.767272	0.105598	-0.250837	-0.0264899	-0.441651	-0.641588	-0.368408	-0.604149	-1.21156
YDR072C	IPT1	0.385715	0.409865	-0.134783	-0.0839885	0.101986	0.390191	0.527774	0.327209	0.0331039	0.419377
YDR073W	SNF11	-0.232921	-0.533356	0.0306634	-0.223306	-0.0555845	-0.363836	-0.186406	0.357253	-0.636673	0.588769
YDR074W	TPS2	1.01147	1.26498	0.0192459	1.51124	0.326644	1.61676	0.318921	0.128925	0.876123	-0.0427007
YDR075W	PPH3	0.477557	-0.0427021	0.133856	-0.693986	-0.278686	0.0773176	0.0889952	-0.382899	-0.10456	-0.472688
YDR076W	RAD55	0.476684	0.835331	-0.21857	-0.300357	0.260934	0.821831	1.26142	0.507858	0.386657	1.42232
YDR077W	SED1	0.519963	0.659236	0.870049	1.241	-3.01697	1.84223	-0.0969759	0.51926	0.407392	0.743223
YDR078C	SHU2	-0.621679	-0.280655	0.0698407	-0.139434	0.853002	-0.242097	0.233429	0.800189	-0.806644	1.44969
YDR079C-A	TFB5	-0.388813	-0.947643	0.300645	0.155444	0.202314	-0.146302	-0.123865	0.589973	-1.02052	-0.37404
YDR079W	PET100	0.265433	0.0687058	0.49898	0.589303	0.599319	0.752065	-0.40671	-0.0224991	-0.18081	-0.33836
YDR080W	VPS41	-0.275073	0.148346	-0.152952	1.01963	0.148518	-0.11149	0.239281	-0.00700346	0.0849708	0.757776
YDR081C	PDC2	-0.1578	0.251906	-0.623177	0.178374	-0.496656	-0.554348	0.332357	-0.646841	0.175197	-0.836682
YDR082W	STN1	-0.310386	-0.12696	-0.198228	-0.469429	0.271947	-0.29393	-0.209171	0.408013	-0.426012	1.74441
YDR083W	RRP8	-0.479324	-0.63383	-0.435691	-0.649755	-1.02134	-0.594935	0.0209883	-0.603318	-0.0932871	-0.67778
YDR084C	TVP23	0.158307	-0.17589	0.0627834	-0.520127	0.191999	-0.330396	-0.603429	-0.110443	-0.215589	-1.26604
YDR085C	AFR1	-0.03331	0.680763	-0.14225	1.83133	0.366123	1.62631	0.162866	1.1141	-0.0542074	0.920456
YDR086C	SSS1	-0.860356	-1.04507	0.0019828	-0.664438	-0.355838	-0.864348	-0.634276	-0.11726	-0.593864	-1.2279
YDR087C	RRP1	-0.496218	-0.70609	-0.0738863	-0.732365	-0.469089	-0.83459	-0.258136	-0.552198	-0.701121	-0.680587
YDR088C	SLU7	0.0801651	0.877384	-0.020924	0.304583	-0.176467	0.457301	-0.00755505	0.129866	-0.088279	0.480285
YDR089W	YDR089W	0.5904	0.392953	0.0934451	0.147266	-0.917332	-0.218219	-0.149765	0.0224162	0.0224751	0.324357
YDR090C	YDR090C	0.176902	-0.130539	-0.00327335	-0.640862	0.314677	0.186233	0.180173	-0.0750707	0.129022	0.117005
YDR091C	RLI1	0.459335	-0.271747	-0.224915	-0.816531	-0.67086	-0.166555	0.246226	-0.931979	0.209277	-1.29736
YDR092W	UBC13	-0.366232	-0.501544	-0.0324925	-0.291174	0.789401	-0.386103	-0.50034	0.133523	-0.678576	-0.428293
YDR093W	DNF2	0.720838	0.435806	0.348212	-1.10556	-0.320671	-0.0490191	0.568225	-0.00346422	0.444612	-0.171917
YDR096W	GIS1	0.606681	0.922784	-0.590172	0.40522	-1.30855	0.685225	0.109263	-0.318584	0.227461	-0.596041
YDR097C	MSH6	0.253383	0.338049	-0.304989	0.768124	-0.531414	-0.278382	0.288589	-0.717044	0.52108	-0.714435
YDR098C	GRX3	-0.367201	-0.739248	-0.0611989	-0.230815	0.0260875	-0.783424	-0.527916	-0.104633	-0.668398	-1.1779
YDR099W	BMH2	-0.433531	-0.469686	0.0958702	-0.387222	0.0478845	-0.497683	-0.440211	-0.211635	-0.308341	-1.13992
YDR100W	TVP15	0.312462	-0.0109318	0.0615722	0.193045	0.549408	0.316894	-0.186625	0.281292	0.0382262	-0.494293
YDR101C	ARX1	-0.115683	-0.173465	-0.0828931	-0.806242	-0.524088	-0.354278	0.257754	-0.593573	0.0191132	-1.04938
YDR103W	STE5	-0.0924115	0.666841	-0.0413459	0.680542	-0.265518	-0.162163	0.268772	-0.0878903	0.359501	-0.0296438
YDR104C	SPO71	0.248211	-0.154118	-0.222712	0.447609	0.158411	-0.589224	-0.0778041	-0.344451	0.134153	-0.939362
YDR105C	TMS1	0.486602	0.657638	-0.0128247	-0.497797	0.0832381	-0.0451363	0.156944	-0.153948	0.241904	-0.102343
YDR106W	ARP10	-0.984001	-0.696548	-0.44462	0.888369	-0.576546	0.104239	0.531379	1.38159	-0.429425	-0.590018
YDR107C	TMN2	1.05435	1.24531	-0.44478	-0.312287	0.506257	-0.211719	-0.0593109	-1.5356	1.05084	0.825482
YDR108W	TRS85	0.293167	0.375982	-0.421277	0.412946	0.112254	0.126455	0.242283	-0.488079	0.12664	-0.11254
YDR109C	YDR109C	-0.160876	0.426227	0.165844	0.0644103	-0.0989948	0.767494	0.48382	-0.278757	0.411658	-0.201595
YDR110W	FOB1	0.301554	0.381585	-0.0732394	-0.45495	-0.401598	-0.12317	0.2846	-0.302252	-0.047207	0.0276419
YDR111C	ALT2	-0.85991	-0.48034	-0.596081	-0.665184	-0.131056	0.142948	0.287245	-0.218461	-0.0710799	0.0417658
YDR113C	PDS1	-0.265821	0.432264	-0.0118324	0.646278	-0.129584	0.366892	-0.712235	-0.713329	-0.397252	0.173213
YDR115W	YDR115W	-0.211448	-0.484849	0.527229	-0.561324	1.17863	0.610883	-0.750951	0.1756	-0.647776	0.0437743
YDR116C	MRPL1	0.23056	-0.236402	0.410797	-0.575102	0.885573	0.830239	-0.827037	-0.00223511	-0.320064	-0.336527
YDR117C	TMA64	-0.0366748	-0.0879689	-0.3432	0.238188	-0.072384	-0.0860678	-0.3408	-0.683896	-0.108303	-0.610027
YDR118W	APC4	0.425667	0.185972	0.0878746	0.242943	0.272032	0.544915	0.316971	0.185425	-0.0919211	0.884546
YDR119W	VBA4	0.569495	0.596343	0.226269	-0.487543	-0.260262	-0.803143	0.230211	-0.744622	0.59273	-0.047246
YDR120C	TRM1	-0.310957	-0.502464	-0.272064	-1.24809	-0.683864	-0.890192	-0.182012	-0.751092	-0.35678	-1.30737
YDR121W	DPB4	-0.385493	-0.211911	-0.189976	0.160466	-0.285329	-0.449094	-0.226892	-0.377592	-0.417706	-0.518275
YDR122W	KIN1	0.25712	0.88668	-0.00599043	0.674461	0.101352	0.387311	-0.465729	-0.673424	0.34484	-0.477336
YDR123C	INO2	-0.254788	-0.235719	0.262996	-0.658834	-0.78207	-0.0312536	-0.133188	-0.386026	-0.278952	1.41709
YDR124W	YDR124W	0.138851	-0.0902612	0.457865	0.475347	0.147081	-0.419602	0.792978	0.248049	-0.0473867	1.26458
YDR125C	ECM18	-0.451092	-0.847442	0.314823	-0.224605	0.390502	-0.5292	-0.550923	-0.0853443	-0.271241	-1.01085
YDR126W	SWF1	-0.0595271	-0.389299	-0.0122253	0.0385587	0.312095	-0.162849	0.508284	1.36813	-0.420369	1.02044
YDR127W	ARO1	-0.414851	-0.110127	0.107069	-0.276212	-0.506818	-0.369928	0.33759	-0.0555566	0.621826	-0.27875
YDR128W	MTC5	-0.414368	-0.0572644	-0.135528	-0.103076	-0.0953258	-0.573812	0.202648	-0.307304	0.112838	-0.586366
YDR129C	SAC6	0.689538	0.368113	-0.311644	0.63853	-0.173101	-0.126033	0.513763	-0.556564	0.676292	-1.59551
YDR130C	FIN1	-0.695699	-0.346678	0.119483	0.132062	-0.0949275	0.254854	-0.977001	-0.366283	-0.744275	0.845493
YDR131C	YDR131C	0.0943876	-0.0559853	0.144049	0.31876	0.278306	0.302565	0.083729	0.187598	-0.0185382	0.857225
YDR132C	YDR132C	0.00937183	-0.123946	0.336231	0.184889	0.128668	0.0992166	1.15999	0.0127602	0.486252	0.229789
YDR135C	YCF1	0.882681	0.730181	0.179537	-0.840868	-0.349161	-0.871293	1.29756	-0.542461	1.10521	-0.881178
YDR137W	RGP1	0.122852	0.13238	0.267513	0.481478	-0.116804	0.58321	-0.00139127	-0.154053	0.0444903	0.556859
YDR138W	HPR1	1.07499	-3.60364	-0.710275	0.122951	0.146308	-0.429035	0.846331	-0.150385	0.359142	-0.418985
YDR139C	RUB1	-1.31792	-1.05587	0.141581	-0.719529	0.264725	-0.729019	-0.688939	0.083906	-1.11358	-0.348454
YDR140W	MTQ2	-0.628553	-0.40543	0.0864428	-0.605143	0.162865	-0.385047	-0.423063	0.020013	-0.743465	-0.161606
YDR141C	DOP1	0.394441	0.70392	-0.0548803	0.347102	-0.590155	-0.318972	0.557587	-0.328512	0.492845	-0.683418
YDR142C	PEX7	-0.283496	-0.392045	-0.0969952	-0.00169724	-0.151942	0.450197	-0.272604	-0.0399614	-0.353296	-0.277425
YDR143C	SAN1	-1.02658	-0.050052	-0.305737	-0.271727	0.193036	0.390031	-0.0541384	-0.0374422	-0.173748	-0.685474
YDR144C	MKC7	1.16537	0.352185	0.13853	-1.08197	-0.21449	-0.490271	0.831748	-0.421672	0.744478	-0.659939
YDR145W	TAF12	-0.283772	-0.0125021	-0.0900416	0.112056	-0.160072	-0.0937912	-0.0846122	0.0797359	-0.0711236	0.296603
YDR146C	SWI5	0.302575	0.66482	-0.33681	0.668368	-0.574522	0.152321	-0.144476	-0.616873	-0.0371578	-0.274856
YDR147W	EKI1	0.105082	0.386889	0.166837	0.0828162	0.0533451	0.0540045	0.301444	-0.0293593	0.143094	1.08004
YDR148C	KGD2	0.339854	-0.256614	-0.341379	0.103791	0.0840059	0.315731	-0.532711	-0.71177	0.0127557	-0.904015
YDR150W	NUM1	0.43046	0.478177	-0.11458	0.169153	-0.469794	-0.239075	0.946896	-0.609656	0.835967	-1.02106
YDR151C	CTH1	0.348826	-0.224289	0.082136	0.133064	-0.34258	0.0861235	0.287287	0.141665	-0.178632	0.734906
YDR152W	GIR2	-0.606312	-0.385147	-0.0351736	-0.281946	-0.271323	-0.285373	-0.328403	-0.262578	-0.457339	-0.497517
YDR153C	ENT5	0.719802	0.437821	0.0699831	0.912789	-0.320902	0.22898	0.439748	-0.305522	0.283672	-0.478493
YDR155C	CPR1	-0.71409	-1.00448	0.47501	-0.934848	-0.246316	-0.564029	-0.560581	-0.260166	-0.587784	-1.65244
YDR156W	RPA14	-0.226303	-0.815401	-0.0787873	-0.649907	0.193995	0.0443162	-0.429165	-0.141023	-0.590804	-0.654674
YDR158W	HOM2	-0.919406	-1.16577	0.0422757	-1.32925	-0.499512	-1.56737	-0.577887	0.0673851	-0.69695	-1.10214
YDR159W	SAC3	-0.0678944	-0.0114678	-0.275045	-0.383514	-0.353353	-0.478938	-0.0311981	-0.290945	0.148787	-1.06737
YDR160W	SSY1	-0.334585	0.557299	-0.0541887	-0.000106131	0.251825	-0.775745	0.499708	-0.190707	0.64052	0.450723
YDR161W	YDR161W	-0.182257	-0.537168	-0.0936774	-0.80859	-0.355781	-0.615229	-0.115382	-0.340506	-0.386949	-0.824842
YDR162C	NBP2	-0.299259	0.734201	0.0683695	1.06681	0.111213	0.00778821	0.17668	0.144141	-0.262095	0.142986
YDR163W	CWC15	-0.252905	0.503167	-0.175452	0.714778	0.369441	-0.2704	-0.251951	-0.0728168	-0.537568	0.537101
YDR164C	SEC1	0.0630983	-0.0860199	-0.132253	-0.010963	0.330979	-0.120741	0.136038	0.00983462	0.221091	0.193193
YDR165W	TRM82	-0.262297	-0.481186	-0.130534	-0.469467	-0.775001	-0.55118	-0.183421	-0.616067	-0.265969	-0.51381
YDR166C	SEC5	0.283781	0.438792	-0.125276	0.570569	-0.369451	-0.323879	0.222881	-0.24077	0.340144	-0.286642
YDR167W	TAF10	0.338584	0.106878	-0.0746308	0.217799	0.149337	-0.522642	-0.142522	-0.428061	-0.15911	-0.431156
YDR168W	CDC37	0.0771033	-0.119175	0.161326	0.178918	0.103693	-0.265622	0.0100454	0.0620959	-0.158728	0.310829
YDR169C	STB3	0.586562	0.856185	-0.200537	-0.0856983	-0.717256	0.0367312	0.0848728	-0.797438	0.466374	0.456598
YDR169C-A	YDR169C-A	-0.636046	-0.90748	0.280119	-0.447777	0.0665183	-0.546022	-0.47108	0.16067	-0.565187	-1.36672
YDR170C	SEC7	0.0707281	-0.161332	-0.153852	-0.680894	-0.941489	-0.395775	0.111052	-0.965806	0.304018	-1.15209
YDR171W	HSP42	-0.361748	-0.388653	-0.849622	1.02919	-0.102801	0.214867	-0.326829	-0.260745	-0.0986801	-1.68544
YDR172W	SUP35	0.150097	-0.314705	-0.112216	-0.00245627	-0.558796	0.0530217	-0.0931602	-0.820904	0.0579815	-1.41486
YDR173C	ARG82	-0.0995627	0.474779	-0.0216742	-0.24997	-0.122867	-0.46423	0.31791	1.39641	-0.481175	0.0566447
YDR174W	HMO1	-0.417406	-0.746381	-0.119206	-0.540143	-0.255701	-0.192714	-0.386696	-0.192347	-0.42226	-0.0646737
YDR175C	RSM24	-0.0588608	0.00988373	0.118389	-0.05422	0.862249	0.787937	-0.479788	-0.121746	-0.39989	0.107284
YDR176W	NGG1	-0.275191	0.192207	0.242919	-0.401875	-0.219864	-0.1593	-0.3889	-0.201026	-0.0826675	0.455004
YDR177W	UBC1	0.00399108	0.0187179	0.0967629	0.354405	0.204469	-0.279242	-0.0482567	0.381603	-0.38577	-0.287696
YDR178W	SDH4	0.595711	0.0702733	-0.0543336	0.515869	0.290762	1.23574	-0.424957	-0.0950428	0.00715273	-0.491659
YDR179C	CSN9	-0.867392	0.12756	0.192308	0.339965	0.872482	-0.240383	-0.464032	0.20809	-0.779132	0.284353
YDR179W-A	YDR179W-A	-0.695755	-0.228552	-0.195434	-0.894235	0.0420859	-0.560864	-0.207002	-0.251172	-0.450183	0.342149
YDR180W	SCC2	-0.0924875	0.433288	-0.272565	-0.138732	-0.891869	-0.458383	0.287262	-0.541649	0.278784	-1.28453
YDR181C	SAS4	-0.0366459	-0.204822	-0.151768	-0.0685459	0.259737	-0.388623	-0.642331	-0.0580017	-0.418698	0.49056
YDR182W	CDC1	0.585482	0.40414	-0.344824	-0.142932	-0.384363	-0.509255	0.0823664	-0.79027	0.470209	-0.814834
YDR182W-A	YDR182W-A	0.378603	0.893136	-0.104341	-0.214784	-0.18598	-0.69856	1.00129	0.251923	0.068325	-0.134846
YDR183W	PLP1	-0.425724	-0.466382	0.0536631	0.28808	0.417968	-0.146133	-0.414692	0.106591	-0.486671	-0.0624627
YDR184C	ATC1	-0.287403	-0.404244	0.0650307	-0.626773	-1.03681	0.118286	-0.229815	-0.410127	-0.384537	-0.288186
YDR185C	UPS3	1.4911	0.707245	-0.0139	0.947364	0.511782	1.3012	0.842601	1.60009	-0.66357	0.683456
YDR186C	YDR186C	0.0761215	0.223756	-0.216509	0.0770481	-0.639076	-0.316492	0.228463	-0.151983	0.115402	-1.10823
YDR188W	CCT6	0.19873	-0.433602	0.0124804	-0.57283	0.162855	0.23854	-0.0905819	-0.10133	0.0175895	-1.35152
YDR189W	SLY1	0.0986358	0.151629	-0.247036	0.388269	-0.246055	-0.11399	-0.0267704	-0.718574	0.290365	-1.02618
YDR190C	RVB1	0.123505	-0.373576	-0.208469	-0.089375	-0.340333	-0.345055	-0.209844	-0.475182	-0.143243	-1.02982
YDR191W	HST4	-0.013753	0.0326067	-0.17736	-0.0939092	-0.39525	0.595163	0.0312512	0.0693375	-0.0735287	0.0187306
YDR192C	NUP42	0.0126623	0.16781	-0.129934	0.460771	0.0961881	0.414675	0.084838	-0.411341	0.243123	-0.424897
YDR194C	MSS116	0.274382	-0.00846938	-0.122424	-1.01294	0.103919	0.194527	-0.0565047	-0.607214	0.134138	-0.944974
YDR194W-A	YDR194W-A	-0.670551	-0.943901	0.209018	-0.264332	0.015866	-0.457045	-0.215616	0.1129	-0.527341	-1.2786
YDR195W	REF2	0.075824	0.54368	0.0770065	0.698961	-0.110949	0.420624	-0.0822515	-0.0793385	-0.197616	0.332282
YDR196C	CAB5	-0.47943	-0.299285	0.229866	0.3037	0.368913	0.0701201	-0.676094	0.052813	-0.499996	0.0927257
YDR197W	CBS2	-0.277588	-0.0513573	0.213916	0.246574	0.210986	0.772312	-0.395381	0.219113	-0.329963	-0.0148357
YDR198C	RKM2	-0.291239	-0.243467	0.175342	-0.185569	0.0204412	-0.486998	0.102243	-0.127281	-0.679519	0.219152
YDR200C	VPS64	0.110942	0.430224	0.272437	0.234604	0.317518	0.718317	-0.0307489	0.129422	0.0792956	0.0550559
YDR201W	SPC19	-0.301207	-0.618736	0.123275	-0.967036	0.11298	-0.147689	-0.892908	-0.429813	-0.607203	-0.737281
YDR202C	RAV2	-0.193407	-0.179694	-0.00873289	0.267006	0.487056	0.0925088	-0.44084	0.113568	-0.357674	-0.645821
YDR204W	COQ4	0.0687468	-0.270614	-0.123188	-0.0656793	0.816839	-0.0696937	-0.817744	0.193191	-0.386496	-0.341581
YDR205W	MSC2	0.466402	0.563576	-0.312726	-0.424982	-0.164326	-0.0409617	0.736402	-0.542302	0.749369	-0.252968
YDR206W	EBS1	-0.0763979	0.171181	-0.273254	-0.994884	-0.384027	-1.00405	0.366091	-0.580941	0.0996014	0.620169
YDR207C	UME6	0.140818	0.239007	-0.535497	-0.549762	-0.556017	-0.373542	0.0071251	-0.196161	0.0467355	0.356962
YDR208W	MSS4	0.0734092	0.424975	0.0474239	-0.148264	-0.836202	0.365542	0.198602	-0.309895	0.32877	-0.992425
YDR210W	YDR210W	-1.26009	-1.1283	0.0461495	-1.00471	-0.0295875	-0.759751	-0.846243	-0.223704	-0.767467	-0.247397
YDR211W	GCD6	0.116299	0.0642347	-0.147316	-0.128599	-0.483962	-0.542072	0.322565	-0.280163	0.0398745	-0.62738
YDR212W	TCP1	0.110896	-0.336444	-0.300993	-0.9389	-0.134753	-0.104324	0.135567	-0.258341	0.102214	-1.12218
YDR213W	UPC2	0.40585	-0.434378	0.0238251	-0.838768	0.354779	-0.403294	0.43213	0.750845	-0.00642538	1.59687
YDR214W	AHA1	0.260818	-0.282777	0.278268	0.718217	-0.131007	0.00901618	0.259768	0.707655	0.0403729	-0.0231486
YDR216W	ADR1	1.50369	1.4433	-0.963052	2.24613	-1.38946	1.63946	1.66547	-0.192136	1.82705	0.0440289
YDR217C	RAD9	0.20808	0.276607	-0.238535	-0.398493	-0.502148	-0.61134	0.392767	-0.269869	0.466882	-0.932417
YDR218C	SPR28	-0.557616	-0.823218	0.129625	0.00388717	0.274116	-0.19603	-0.504104	0.148018	-0.532881	-0.702703
YDR219C	MFB1	0.261797	0.680876	-0.466029	0.141347	-0.174945	0.0471485	-0.245919	-0.239846	0.0391702	-0.120516
YDR221W	GTB1	0.054911	0.444383	-0.637887	-0.0784664	0.219934	-0.948658	0.593269	-0.447159	0.923965	0.553425
YDR222W	YDR222W	0.786395	-0.402117	-0.412666	-1.69112	-2.28391	-0.890095	0.56039	-0.00479613	0.222146	-0.00445064
YDR223W	CRF1	-0.415427	-0.138504	0.110633	0.0384858	0.565747	0.065619	0.516887	-0.081071	-0.29928	0.00162377
YDR224C	HTB1	-0.614906	-1.0179	0.113443	-0.940941	-0.933886	-0.210985	-0.828474	-0.628597	-0.605037	-1.59298
YDR225W	HTA1	-0.533381	-1.33619	-0.141587	-0.962113	-1.46393	-0.381631	-0.751863	-0.704589	-0.698222	-1.56509
YDR226W	ADK1	-0.764643	-1.21918	0.217618	-1.59767	-0.3167	-0.969524	-0.723862	-0.460986	-0.630044	-1.46953
YDR227W	SIR4	0.023609	0.148625	-0.215537	-0.343337	-0.17958	-0.892187	0.450923	-0.481112	0.518784	-0.141395
YDR228C	PCF11	0.283541	0.340114	-0.189074	0.162477	-0.151265	-0.139628	0.481151	0.193778	0.0995276	0.0961189
YDR229W	IVY1	0.278439	0.247079	0.193595	0.522784	-0.136908	0.161765	-0.19829	-0.397363	-0.0634684	-0.0937568
YDR231C	COX20	0.00320944	0.311538	-0.311142	0.647866	0.684639	0.645827	-0.618963	0.320705	-0.503313	0.171057
YDR232W	HEM1	0.332209	-0.168892	-0.144474	-1.19342	-0.52161	-0.331891	0.133233	-0.417088	0.0709463	-0.94549
YDR233C	RTN1	0.186642	-0.34954	-0.103032	-0.819545	-0.154454	-0.802342	-0.0157934	-0.304032	-0.0736106	-1.01853
YDR234W	LYS4	0.195487	-0.292349	-0.0879403	-1.11881	-0.450998	-0.555631	0.26144	-0.39509	0.213498	-0.689829
YDR235W	PRP42	-0.280885	0.0699331	0.468274	0.516026	0.194148	-0.227094	0.00895166	-0.317691	0.0670744	0.261936
YDR236C	FMN1	-0.714315	-1.29403	-0.135813	-0.432167	0.803992	-0.807024	-0.615487	-0.00549825	-0.598338	0.112346
YDR237W	MRPL7	0.0790591	-0.0304092	0.515533	-0.315399	0.627181	0.653221	-0.63282	0.0368306	-0.310542	-0.0977928
YDR238C	SEC26	-0.0802162	0.0579236	-0.15831	-0.38605	-0.480147	-0.305374	-0.0237234	-0.755446	0.340358	-1.08558
YDR239C	YDR239C	-0.0955424	0.451126	-0.0345617	0.357434	-0.315565	-0.131566	0.311213	-0.265446	0.0992725	-0.168801
YDR240C	SNU56	-0.535036	-0.391906	-0.267876	0.384226	0.104734	0.12169	-0.298954	-0.226101	-0.437472	0.170926
YDR242W	AMD2	0.498852	-0.232271	0.265829	0.130364	0.686018	-0.332982	-0.665547	0.289576	0.292878	1.52931
YDR243C	PRP28	0.111037	-0.621998	-0.0848243	-0.464576	-0.588299	-0.628508	-0.632218	-1.16225	0.0481181	-0.271214
YDR244W	PEX5	0.200355	0.348562	-0.134664	0.462655	-0.0629022	0.0767531	-0.0169073	-0.0855875	0.0580478	-0.106707
YDR245W	MNN10	0.0286119	0.0411589	-0.172738	-0.78385	-0.70095	-0.443128	0.0974974	-0.324025	0.051665	-0.285891
YDR246W	TRS23	0.0165177	0.0938399	0.0996808	0.657238	0.216835	-0.364973	-0.220341	0.0328971	-0.368513	0.495027
YDR246W-A	YDR246W-A	-0.34319	0.132909	-0.0922618	0.128859	0.441399	-0.457462	0.285005	-0.0845734	-0.0807404	1.08186
YDR247W	VHS1	0.591882	0.594402	-0.151161	0.168311	-0.380299	0.488871	0.108239	-0.690894	0.267407	-0.276197
YDR248C	YDR248C	-0.678189	-1.07633	0.299054	-0.00985663	1.02813	-0.317294	-0.0695245	0.21855	0.0186923	-0.519146
YDR249C	YDR249C	-0.648912	-0.390806	0.197665	-0.493081	0.0644274	0.316463	-0.00738987	0.320633	-0.545703	0.963255
YDR251W	PAM1	0.239234	0.73672	0.234531	0.237851	-0.886847	0.546137	0.0433007	0.141005	0.226762	0.350642
YDR252W	BTT1	-1.11281	-0.61515	0.109163	0.378705	0.305925	-0.0716267	-0.500173	-0.0532612	-0.996291	1.19463
YDR253C	MET32	-0.687258	0.510459	0.241477	-0.11901	-0.587797	0.54876	0.262219	-0.638051	0.149063	-0.67537
YDR254W	CHL4	-0.163218	0.188073	0.28313	0.107146	0.709136	0.194748	-0.181922	0.163694	-0.160057	1.5757
YDR255C	RMD5	0.821993	0.827625	0.219526	1.28601	0.885522	0.657011	0.0143374	-0.219902	0.406813	0.663732
YDR256C	CTA1	0.0311869	0.26086	-0.163476	-0.15463	-0.295017	-0.490759	0.563839	-0.438693	-0.177513	0.38615
YDR257C	RKM4	0.21469	0.220252	-0.129055	-0.172445	-0.165994	-0.638709	-0.0133615	0.136715	-0.208092	0.634342
YDR258C	HSP78	0.0255424	1.23344	-0.0217882	1.00775	0.565589	0.858074	0.103871	-0.0276168	0.72014	-0.860878
YDR259C	YAP6	1.6995	-0.0272256	0.639364	0.950967	-0.522672	0.01147	1.16949	1.96938	0.15903	1.91962
YDR260C	SWM1	-0.122428	-0.715554	-0.194281	-0.348003	0.561196	0.4318	-0.801791	-0.367482	-0.420053	0.752764
YDR261C	EXG2	-0.299449	-0.094932	-0.214035	-0.962936	-0.483018	-0.824892	0.261664	-0.03211	0.0137003	-0.458418
YDR261C-D	YDR261C-D	-2.32812	-0.392041	-0.442416	0.242946	-1.82861	-0.617471	0.410327	0.0770635	0.362913	-1.27032
YDR261W-B	YDR261W-B	-1.49589	-0.135694	0.215299	0.110125	-1.34689	-0.0974588	0.280915	-0.0278059	0.0724111	-0.922885
YDR262W	YDR262W	0.108656	0.514891	-0.065217	-0.0175148	-0.0888613	0.118135	0.171743	0.513088	-0.49744	0.247031
YDR263C	DIN7	1.38357	1.56833	0.0583968	-0.066653	0.262602	-0.257329	1.51531	0.409914	0.504217	0.427252
YDR264C	AKR1	0.537913	0.481123	-0.00505011	-0.0433256	0.815854	-0.487655	0.749285	0.290429	0.777196	0.00742088
YDR265W	PEX10	0.308455	-0.0105633	0.338034	0.138711	0.835352	0.43722	-0.160548	0.599173	-0.207854	1.50737
YDR266C	YDR266C	0.101594	-0.15119	-0.122246	-0.159314	-0.504535	-0.15792	-0.0516023	-0.6853	-0.0624683	-0.781312
YDR267C	CIA1	0.0100715	-0.295864	0.158023	0.121404	-0.0408305	-0.189467	-0.490866	-0.291119	-0.478864	0.150947
YDR268W	MSW1	-0.28289	-0.700567	0.12641	-0.746758	0.825097	-0.175329	-0.800204	-0.182631	-0.0639019	0.362152
YDR270W	CCC2	0.555949	0.838954	0.389079	-0.798256	0.270377	-0.559574	0.466053	0.38701	0.69657	-1.80364
YDR272W	GLO2	-0.260091	-0.637151	-0.174806	0.879883	0.37021	0.13232	-0.403358	-0.052547	-0.324921	-0.857446
YDR273W	DON1	0.261205	-0.455607	-0.344181	0.0771249	0.63165	0.168776	0.569027	0.0645102	0.333158	0.586889
YDR275W	BSC2	-0.838827	-0.76078	-0.540074	-0.435198	0.877954	-0.388158	0.0982503	0.0349015	-0.728072	0.394971
YDR276C	PMP3	-0.502187	-0.860316	0.17773	-0.559765	0.0918495	-0.348239	-0.395751	-0.248243	-0.302335	-1.35249
YDR277C	MTH1	1.53233	0.926158	-0.382269	2.04094	-0.255007	2.28481	-0.745484	-0.171887	0.0850988	0.617516
YDR279W	RNH202	-0.716237	-0.560267	-0.100864	-0.389599	-0.211101	-0.847168	-0.662358	-0.30587	-0.413593	-0.336054
YDR280W	RRP45	-0.159826	-0.269788	0.0145165	-0.27759	-0.164274	-0.191704	-0.127296	-0.0949491	-0.62024	-0.14885
YDR281C	PHM6	-0.398337	-2.97057	1.22233	-2.62995	-0.985642	0.431244	-0.995717	-0.830299	-0.452161	-0.378583
YDR282C	YDR282C	0.306696	-0.167385	-0.434152	-0.526834	0.347928	0.219186	-0.642342	-0.392493	-0.0449678	0.711636
YDR283C	GCN2	-0.202806	-0.00711263	-0.107002	-0.23089	-0.440408	-0.689642	0.353001	-0.275405	-0.295328	-0.595089
YDR284C	DPP1	0.0868513	0.444538	-0.0664007	-0.663741	-0.0791729	-0.443612	-0.0737756	-0.346931	0.322405	-0.238075
YDR285W	ZIP1	-0.414983	0.252624	-0.286614	-0.418571	-0.033683	-0.847162	-0.026933	-1.15016	-0.213381	0.820769
YDR286C	YDR286C	-0.612447	-0.804184	0.231729	-0.355505	0.920154	0.19349	-0.828323	0.0634541	-0.693844	-0.128283
YDR287W	INM2	-0.28437	-0.323675	-0.21828	0.0744648	0.432159	-0.623392	-0.687292	-0.237438	-0.172293	-0.443185
YDR288W	NSE3	-0.437696	-0.153453	-0.0458161	-0.386969	-0.421634	0.10689	-0.413938	0.0182483	-0.639888	0.548222
YDR289C	RTT103	-0.0347592	0.755667	0.212622	1.16655	0.0449976	0.00502815	-0.102289	0.20286	-0.196468	0.172936
YDR291W	HRQ1	0.262916	0.0871533	-0.141709	-0.70731	-0.00920547	-0.53111	0.437522	-0.136547	0.214527	0.168041
YDR292C	SRP101	-0.0475614	-0.220818	-0.545333	-0.160699	-0.916182	-0.739386	-0.0202339	-0.772043	0.146399	-1.31611
YDR293C	SSD1	0.481917	0.676604	-0.0866874	0.240601	-0.944273	0.155529	0.814374	-0.166868	0.697124	-0.404456
YDR294C	DPL1	0.238501	0.213715	-0.179052	0.0384255	-0.230486	-0.171884	0.194617	-0.0360775	0.347613	-0.489208
YDR295C	HDA2	-0.146433	0.483854	-0.144731	0.922409	-0.0390258	0.0918785	0.337585	-0.0915438	0.132283	-0.0288453
YDR296W	MHR1	0.314081	0.0331539	0.649126	0.357716	1.1832	0.90026	-0.325942	0.372627	-0.484717	0.222903
YDR297W	SUR2	0.377319	0.0788577	-0.181611	-0.998652	-0.374289	-0.576427	-0.166926	0.119614	-0.362055	-0.76263
YDR298C	ATP5	0.112857	-0.500939	0.353668	-0.493788	-0.434832	0.889345	-0.474354	-0.169433	-0.436586	-0.319838
YDR299W	BFR2	-0.119586	-0.284995	-0.290095	-0.217079	-1.23553	-0.413671	0.0600566	-0.782931	-0.190256	-0.333901
YDR300C	PRO1	-0.0800191	-0.258044	0.135482	-0.508855	-0.284486	-0.480787	-0.092078	-0.339679	-0.281732	-0.444726
YDR301W	CFT1	0.226003	0.203248	-0.188299	-0.0450771	-0.41115	-0.0267812	0.283436	-0.210756	0.332881	-1.05244
YDR302W	GPI11	-0.0525254	-0.256446	-0.117667	-1.19005	-0.341229	-0.358062	-0.212066	-0.509965	-0.0862873	-0.95517
YDR303C	RSC3	0.232514	0.0115016	-0.284737	-0.618078	-0.576493	-0.62733	0.28388	-0.693015	0.335741	-0.864834
YDR304C	CPR5	-0.204627	-0.287535	0.00975899	-0.704293	0.16071	-0.736073	-0.144711	-0.277476	-0.159849	-1.18986
YDR305C	HNT2	-0.867096	-0.636452	0.0471694	0.279677	0.775757	-0.133214	-0.461011	0.059732	-0.695607	-0.169867
YDR306C	YDR306C	-0.247339	0.216615	0.319055	0.462534	-0.107439	0.252017	-0.212175	-0.1589	0.0486537	0.568375
YDR307W	YDR307W	0.628794	0.835568	-0.466373	-0.0533982	-0.219391	0.132168	0.511379	-0.982641	0.818812	-0.648184
YDR308C	SRB7	-0.00170062	-0.334127	0.385117	0.247483	0.911219	0.40463	-0.23462	0.0339292	-0.729649	-0.183193
YDR309C	GIC2	-0.330112	0.637203	-0.514805	0.529796	-0.927266	0.702873	-0.0329617	-0.774469	0.0795366	0.933548
YDR310C	SUM1	0.455909	0.163915	0.313248	-0.639971	-1.06808	-0.0843554	0.164179	-0.0224504	0.295215	-0.0685855
YDR311W	TFB1	0.392583	0.0125567	-0.123191	0.0528274	-0.196801	0.495373	-0.0901179	0.0589547	0.014758	-0.268658
YDR312W	SSF2	-0.144117	-0.068673	0.269325	0.0574495	-0.662424	0.200891	0.0327383	-0.358028	-0.180985	-0.239809
YDR313C	PIB1	-0.627454	0.100081	0.23164	-0.109108	0.274463	0.385666	-0.273667	-0.365869	-0.285143	-0.278863
YDR314C	RAD34	0.843235	-0.135839	0.126811	-0.090561	-0.355608	-0.0221598	0.31874	-0.307944	-0.0713696	-1.52333
YDR315C	IPK1	-0.427969	-0.0939652	0.145975	0.409976	1.19445	-0.0641477	-0.459194	0.923931	-0.558673	1.15212
YDR316W	OMS1	0.382402	0.362268	0.316647	-0.0522659	0.232785	1.00863	-0.116544	-0.182663	0.12414	-0.140015
YDR316W-B	YDR316W-B	-1.05844	-0.428657	0.458963	-0.319945	-1.31233	0.0457161	0.0961535	-0.375855	0.0532848	-1.07043
YDR317W	HIM1	-1.11634	-1.64064	-0.508069	-1.00285	0.435236	-0.829167	-0.559917	-0.422036	-0.204316	-1.26433
YDR318W	MCM21	-0.433787	0.261645	-0.132456	-0.210621	0.264511	-0.179851	-0.444535	-0.556402	-0.36554	0.299923
YDR319C	YDR319C	-0.0315736	0.19788	0.265249	0.157504	0.318227	0.399266	-0.146859	0.339852	0.0437158	0.324219
YDR320C	SWA2	0.284333	0.282546	-0.207115	0.792895	-0.0414508	0.325107	0.137889	-0.357106	0.221077	-0.400325
YDR320C-A	DAD4	-0.886071	-0.53182	0.169932	-0.257086	-0.264237	0.432732	-1.28289	-0.189496	-1.01363	-0.457061
YDR321W	ASP1	-0.505039	-0.955825	-0.15306	-1.72181	-0.626533	-1.0984	-0.657249	-0.4154	-0.57239	-1.14135
YDR322C-A	TIM11	-0.0427842	-0.416096	0.200566	-0.09431	0.292268	0.757895	-0.974395	-0.849834	-0.416851	-0.830698
YDR322W	MRPL35	0.310139	-0.23054	0.136585	0.257395	0.742859	0.80476	-0.677353	-0.447703	-0.14522	-0.759431
YDR323C	PEP7	-0.580814	-0.106159	0.0747026	-0.646539	0.548677	-0.307392	-0.183732	0.188369	-0.437829	0.95238
YDR324C	UTP4	-0.197818	0.0992579	-0.0699204	-0.379655	-1.31307	-0.162036	0.175906	-0.73436	-0.0845515	-0.608543
YDR325W	YCG1	-0.332622	0.32494	-0.110593	-0.581126	-0.718168	-0.31841	-0.137203	-0.392149	-0.109857	-0.406023
YDR326C	YSP2	0.478413	0.607337	-0.0512551	-0.460428	-1.54495	-0.738448	0.759488	-0.0379398	0.921956	-0.811932
YDR328C	SKP1	-0.50305	-0.893653	0.0602763	-0.231866	0.383628	-0.61179	-0.648628	-0.301454	-0.52658	-0.767766
YDR329C	PEX3	0.196166	0.303148	0.012625	-0.0457608	0.122445	0.0484841	-0.296428	-0.0600614	-0.0148314	0.013157
YDR330W	UBX5	-0.27884	-0.170896	0.0989221	0.238921	-0.158079	0.241278	-0.103832	0.231682	0.0571608	-0.449071
YDR331W	GPI8	0.690688	-0.0045384	0.00865674	-0.652911	-0.0234089	-0.040087	0.0247933	-0.399817	0.081578	-0.194679
YDR332W	IRC3	-1.0641	-0.23868	0.148681	-0.281308	0.557835	-0.341651	0.298343	0.0943179	-0.111492	1.053
YDR333C	YDR333C	0.143879	-0.015026	-0.206909	-0.0625388	0.0486371	-0.258276	0.332432	0.0106167	0.00549017	0.155066
YDR334W	SWR1	-0.197789	-0.0673441	-0.0540999	-0.118618	-0.388996	-0.403472	0.237083	-0.0530282	0.218361	-1.41448
YDR335W	MSN5	0.386565	0.540013	-0.0164859	-0.340131	-0.46177	-0.163764	0.36212	-0.390389	0.559379	-0.632484
YDR336W	YDR336W	-0.520702	-1.02869	-0.26041	-0.906683	0.189938	-0.895435	-0.47568	-0.0465331	-0.58158	0.964164
YDR337W	MRPS28	0.198674	-0.048247	0.490042	0.0628007	0.964752	0.766788	-0.716639	0.278447	-0.478449	0.444623
YDR338C	YDR338C	0.12184	0.278227	-0.222684	0.165699	0.183273	-0.0793023	0.496069	-0.332195	0.435969	-0.113758
YDR339C	FCF1	-0.29913	-0.608369	0.179429	-0.188021	-0.302476	-0.048116	-0.454176	-0.17938	-0.555988	-0.617228
YDR341C	YDR341C	0.0452961	-0.596344	0.0178789	-0.932637	-0.507244	-0.560028	0.00542181	-0.496569	-0.0344806	-1.22334
YDR342C	HXT7	2.59164	3.08121	-0.237822	0.50234	-0.782984	3.80012	-0.102663	-0.647514	1.84974	0.877548
YDR345C	HXT3	0.693667	-0.492587	-0.224346	-0.909342	0.17779	-1.9874	0.490301	-0.633039	0.70599	-1.44833
YDR346C	SVF1	-0.311137	-0.359521	-0.513529	-1.02639	-0.44825	-0.628195	-0.164849	-0.58987	-0.177141	-1.06416
YDR347W	MRP1	-0.159641	-0.134187	0.243521	-0.383231	0.553772	0.366602	-0.876198	-0.311678	-0.191142	-0.263117
YDR348C	YDR348C	0.17753	0.122685	-0.0125006	0.261208	-0.0265159	-0.158301	0.0947975	-0.059862	0.156667	-0.0698164
YDR349C	YPS7	0.226097	0.537806	0.327651	-0.118231	-0.0100228	-0.283441	0.590824	0.595675	0.264761	0.396554
YDR350C	ATP22	0.572248	0.557	-0.199001	0.526807	0.416522	0.71159	0.470993	-0.164862	0.344786	0.227943
YDR351W	SBE2	0.00535544	0.512591	-0.0529655	0.308888	-1.07724	-0.575028	0.359947	0.129942	0.302341	-0.435033
YDR352W	YDR352W	-0.0129208	-0.733177	-0.0936847	-1.57997	-0.487118	-1.22443	-0.518426	-0.473398	-0.481421	-0.0908464
YDR353W	TRR1	-0.405205	-0.689177	0.232233	-1.04502	-0.437597	-0.400238	-0.267378	-0.475104	-0.30117	-1.2398
YDR354W	TRP4	0.234255	-0.173646	0.110518	-0.745202	-0.242776	-0.327746	-0.0306296	0.485793	-0.123328	-0.426388
YDR356W	SPC110	0.0765141	0.941801	-0.487842	-0.0571106	-0.724915	-0.0964807	-0.116668	-0.866494	0.185151	-1.32886
YDR357C	CNL1	-1.05583	-0.624258	0.624598	0.712279	-0.11228	0.453544	-0.471379	0.818257	-0.847947	0.0945574
YDR358W	GGA1	0.11765	0.825771	-0.021935	1.77077	0.740012	0.86902	-0.032394	0.224021	0.268573	0.293768
YDR359C	EAF1	0.220311	-0.187928	0.260244	0.391412	-0.15269	-0.145346	-0.251965	-0.0134526	0.018137	0.980847
YDR361C	BCP1	-0.458384	-0.602435	0.215613	-1.30143	-0.249049	-0.442587	-0.0337005	-0.367698	-0.36303	-0.584302
YDR362C	TFC6	0.617236	0.0233828	-0.262408	0.0708551	0.178057	0.0737617	0.192616	-0.165616	0.17781	-0.316505
YDR363W	ESC2	0.298473	-0.195293	-0.427359	-0.0915191	0.265401	-0.305638	-0.327038	-0.729919	-0.0821501	0.0249778
YDR363W-A	SEM1	-1.27011	-0.426246	0.210338	0.429782	0.38836	-0.44947	-0.347673	0.467649	-0.606283	-0.675824
YDR364C	CDC40	-0.519353	-0.519665	-0.0572652	-0.524628	-0.122229	-0.43701	-0.107979	-0.238697	-0.291262	0.780621
YDR365C	ESF1	-0.512404	0.320741	-0.235436	-0.439881	-1.15404	-0.605085	0.2798	-0.228131	0.0251294	0.623046
YDR366C	YDR366C	-0.310515	-1.7208	-0.0103899	-1.04314	-0.270135	-0.812892	-0.459689	0.411994	-0.771818	-0.655939
YDR367W	KEI1	-0.786045	-1.14973	-0.264204	-1.36496	0.423102	-0.995828	-0.692872	0.0986985	-0.670567	-0.843567
YDR368W	YPR1	0.0940207	-0.491169	0.144391	-0.699439	-0.106204	-0.798459	-0.243466	-0.272976	-0.155354	-1.30173
YDR369C	XRS2	-0.167751	-0.40707	0.0474376	-0.738178	-0.157556	-0.770158	0.197627	0.290388	0.156794	0.0529269
YDR370C	YDR370C	-0.604997	-0.4933	0.111433	-0.260374	0.334939	-0.235503	-0.368874	0.0358706	-0.469706	0.614582
YDR371W	CTS2	-0.0878568	-0.580288	-0.287205	0.648934	0.269756	-0.0658426	-0.214078	0.294375	-0.358528	0.48417
YDR372C	VPS74	-0.53608	-0.252549	-0.0200265	-0.390212	-0.622762	-0.663041	-0.133159	-0.130407	-0.162356	-0.637313
YDR373W	FRQ1	-0.753373	-0.843885	0.0858487	-0.208145	-0.016833	-0.403667	-0.763459	0.13801	-0.611325	-0.993378
YDR374C	YDR374C	-0.55986	-0.861633	0.229387	0.0101687	0.149407	0.371525	-0.0885911	0.311977	-0.450313	-1.25062
YDR375C	BCS1	-0.0561497	0.0117224	0.137604	-0.526231	0.506907	0.216147	-0.473826	0.10837	-0.102039	0.0357762
YDR376W	ARH1	0.13942	-0.437835	0.148132	0.378401	0.384048	0.311771	-0.228035	0.0962065	0.0204552	-0.154195
YDR377W	ATP17	-0.0785201	-0.855717	-0.0438064	-0.174072	-0.187361	0.745455	-0.764335	-0.239149	-0.424417	-0.655766
YDR378C	LSM6	-0.847425	-1.16286	0.266423	-0.345219	0.106239	-0.46358	-0.9259	-0.0460404	-1.08537	-0.801653
YDR379C-A	YDR379C-A	0.698491	0.66787	0.342266	2.60545	1.4646	1.94124	0.37976	1.50033	0.322993	1.57712
YDR379W	RGA2	0.0646583	0.421178	0.13878	0.644868	-0.0398374	0.151256	0.266654	0.129044	0.26155	-0.0894681
YDR380W	ARO10	0.960439	-0.000906038	-0.680039	3.41967	1.1071	3.17645	0.987329	-1.61744	1.7844	1.24385
YDR381C-A	YDR381C-A	-1.91208	-0.570003	0.67623	0.488258	0.110307	1.18719	-0.527077	0.749262	-0.624954	0.644364
YDR381W	YRA1	-0.607489	-0.00825463	0.122953	-0.789841	-0.387971	-0.40075	-0.208466	-0.248151	-0.600966	0.0151766
YDR382W	RPP2B	-1.01313	-1.41676	0.438467	-0.833688	-0.150568	-0.471518	-0.792132	-0.368394	-0.665531	-1.41707
YDR383C	NKP1	-0.650769	-0.0266036	0.0108687	0.74343	0.515981	-0.19599	-0.728199	0.0647165	-0.831073	0.87897
YDR384C	ATO3	0.365831	-0.360865	-0.00640592	-1.58284	-0.58621	-1.30346	-0.267309	-0.255521	-0.416886	-0.0914118
YDR385W	EFT2	-0.199096	-0.837894	0.257953	-1.12811	-0.504977	-0.552475	-0.232026	-0.687108	-0.163193	-1.48024
YDR386W	MUS81	-0.620921	0.11375	-0.669309	0.1529	0.45365	-0.167063	-0.159563	-0.0149869	-0.0151165	1.04726
YDR387C	YDR387C	0.179027	0.30093	-0.474157	0.141111	0.682834	-0.441125	0.389305	0.352589	0.16026	1.24463
YDR388W	RVS167	0.0639455	0.0124247	0.216527	0.24279	-0.307269	-0.215785	-0.522841	-0.0632007	0.0349963	-0.661617
YDR389W	SAC7	-0.13292	0.312477	-0.435003	-0.246376	-0.422455	-0.77921	0.189849	-0.638511	0.154611	-1.31267
YDR390C	UBA2	0.0277108	0.222567	-0.00956676	0.0843848	-0.373248	-0.131039	-0.0453691	-0.14571	-0.075105	-0.135198
YDR391C	YDR391C	-0.494498	1.14207	0.176825	1.25556	0.667054	1.94132	-0.40839	1.13992	-0.335183	1.14063
YDR392W	SPT3	0.55164	0.148391	-0.0382322	0.411165	0.375575	0.103037	-0.231079	-0.254682	-0.119717	0.142036
YDR393W	SHE9	-0.410233	-0.297387	0.241871	-0.80792	0.263182	0.95903	-0.873197	-0.209047	-0.552764	0.594042
YDR394W	RPT3	0.146686	0.144293	0.158724	0.596723	-0.206464	0.0300672	0.0587256	0.0462804	0.063662	-0.299694
YDR395W	SXM1	0.125984	0.330088	0.0245372	-0.609121	-0.986408	-0.783303	0.38221	-0.827353	0.369135	-0.978071
YDR397C	NCB2	-0.585375	-0.835629	0.0402638	-0.151982	0.527634	-0.55491	-0.747735	-0.394187	-0.670807	-0.622524
YDR398W	UTP5	-0.0555812	-0.241769	-0.130285	-0.564071	-0.542396	-0.303728	0.0358912	-0.487718	-0.0899134	-0.304341
YDR399W	HPT1	-0.577313	-0.859472	0.132112	-0.83221	-0.292049	-0.462638	-0.421931	-0.41941	-0.568519	-0.586682
YDR400W	URH1	-0.440503	-0.649629	0.180317	-0.943014	0.226488	0.239911	-0.407189	-0.0524278	-0.418926	-0.687744
YDR402C	DIT2	-0.508746	-1.02758	0.302079	-0.231142	0.186532	-0.462418	0.211973	0.206798	-0.436798	-0.795846
YDR403W	DIT1	0.206647	-1.38293	0.282188	-0.775631	1.25425	0.82711	0.00409689	0.153063	-0.0834719	1.95529
YDR404C	RPB7	-0.157679	-0.526622	-0.212805	-0.469989	-0.177345	-0.382357	-0.190714	-0.177132	-0.348539	-0.385938
YDR405W	MRP20	0.316086	0.192189	0.398091	0.0433426	0.855541	1.02645	-0.450092	-0.116398	-0.235914	0.860897
YDR406W	PDR15	0.37777	-0.19082	-0.347978	-1.12121	1.09648	0.327239	0.356033	-0.0993608	0.488474	0.0290234
YDR407C	TRS120	-0.158582	0.133184	-0.126683	-0.485827	-0.326437	-0.161133	0.0967449	-0.313988	0.29095	-0.294846
YDR408C	ADE8	-0.742554	-1.10758	0.354532	-0.498838	-0.11647	-0.733535	-0.562873	0.13061	-0.769692	0.167065
YDR409W	SIZ1	0.179864	0.295944	-0.155309	-0.0829228	-0.783576	-0.320156	0.167093	-0.32113	0.130637	-0.516152
YDR410C	STE14	-0.308443	-0.698995	0.0460954	-0.709885	-0.236917	-0.511326	0.0497897	0.466531	-0.349927	-0.170018
YDR411C	DFM1	0.297541	0.700322	-0.0641073	0.0512489	0.334214	0.127442	0.0918997	0.0561823	0.396166	0.498261
YDR412W	RRP17	0.0580058	-0.299964	-0.147953	-0.680347	-0.210173	-0.346633	-0.28738	-0.561039	-0.401699	-0.86215
YDR414C	ERD1	-0.0774549	-0.404382	-0.0683184	-1.65988	-0.685871	-0.698564	0.231202	-0.269961	-0.0799468	-0.177342
YDR415C	YDR415C	0.204755	0.341368	-0.155991	0.0559717	-0.316433	-0.258822	0.433257	-0.676415	0.517251	-0.686024
YDR416W	SYF1	0.0519815	-0.0743493	-0.0538166	0.234593	-0.405816	0.121685	0.0110293	0.182104	-0.14146	-0.33916
YDR418W	RPL12B	-0.803305	-1.27068	0.432638	-0.829659	-0.160832	-0.437624	-0.730981	-0.392462	-0.533867	-1.47132
YDR419W	RAD30	-0.291067	0.000308444	0.0297196	-0.496736	0.373736	0.30432	0.0614744	0.05961	-0.174324	0.180782
YDR420W	HKR1	0.0528998	0.182498	-0.208346	-0.30255	-1.71378	-0.557437	0.476012	-0.326843	0.347397	-1.51597
YDR421W	ARO80	-0.31993	0.24973	0.188162	0.130649	0.52276	-0.0844594	0.597003	0.796329	0.18042	0.753938
YDR422C	SIP1	0.300087	0.550408	-0.131145	0.372807	0.152085	-0.0548351	0.48859	-0.169149	0.39397	-0.348218
YDR423C	CAD1	-0.157107	-0.634521	0.284274	1.09963	0.478689	0.46778	-0.691567	0.275397	-0.445657	0.0171596
YDR424C	DYN2	-0.764924	-0.887415	0.230716	-0.170606	0.120832	-0.598639	-0.780101	0.0327645	-0.745109	-0.98685
YDR425W	SNX41	0.339004	0.656625	-0.123298	1.43419	0.341924	0.31154	0.366761	0.379009	0.0772959	-0.557475
YDR427W	RPN9	-0.272035	-0.12535	-0.0946931	0.401018	-0.141777	-0.0613707	-0.366871	-0.0775799	-0.545033	-0.74418
YDR428C	BNA7	-1.43776	-1.24089	-0.295213	-1.26201	-0.0460342	-1.21299	-1.60319	-0.65694	-0.838199	-1.12532
YDR429C	TIF35	-0.39751	-0.941529	0.1667	-0.950167	-0.465054	-0.613585	-0.646525	-0.652674	-0.467876	-1.24398
YDR430C	CYM1	0.59337	0.462995	0.406375	0.091103	-0.335755	1.01119	0.402928	-0.0149044	0.428772	-0.322882
YDR432W	NPL3	-0.0201384	-0.620917	-0.414799	-0.388876	-0.527688	-0.258122	-0.36667	-0.269579	-0.40325	-1.19877
YDR434W	GPI17	0.118213	0.202383	-0.152191	-0.789829	-0.152215	-0.541662	0.246103	-0.381622	0.443929	-0.405782
YDR435C	PPM1	-0.179264	-0.505374	-0.0324825	-0.123339	0.887188	0.372227	-0.6344	0.268598	-0.461799	0.236124
YDR436W	PPZ2	0.290218	0.586902	-0.165032	0.559117	0.195801	0.349006	0.0465378	0.405496	0.497407	-0.064766
YDR437W	GPI19	0.233594	-0.526355	-0.0161758	0.239273	0.108399	0.153098	-0.193927	0.276656	-0.752317	0.723209
YDR438W	THI74	-0.163806	0.494511	-0.111066	-0.210376	0.303452	-0.141176	0.533629	0.0388226	0.497537	0.7802
YDR439W	LRS4	-0.422206	-0.289043	-0.223083	-0.255462	0.220245	-0.280091	-0.150873	-0.054161	-0.366888	0.203959
YDR440W	DOT1	0.00731993	-0.429775	-0.216418	-0.783733	-0.385637	-0.283741	-0.262957	-0.545525	-0.11347	-0.192293
YDR441C	APT2	-0.570644	-0.301613	0.239861	0.454326	-0.153319	0.186917	0.41713	0.61895	-0.152539	-0.146554
YDR443C	SSN2	-0.00145525	0.316401	-0.235604	-0.0140449	-0.288878	-0.604114	0.314022	-0.200475	0.466051	-0.242535
YDR444W	YDR444W	-0.229877	-0.269602	-0.201711	-0.169252	0.219319	-0.499222	-0.299989	-0.513796	-0.308041	-0.13614
YDR446W	ECM11	-0.53217	-0.832856	0.166498	-0.192975	0.386732	-0.220747	-0.435676	0.00243811	-0.34415	-1.11099
YDR447C	RPS17B	-1.00139	-1.40383	0.306647	-0.900707	-0.122479	-0.422644	-0.772962	-0.479084	-0.71193	-1.41327
YDR448W	ADA2	-0.691864	-0.303374	-0.0369189	0.251112	-0.110113	-0.208366	0.0675981	0.10638	-0.261371	1.78036
YDR449C	UTP6	-0.275256	0.0437539	-0.205259	-0.255822	-0.871262	-0.41117	-0.0691442	-0.594807	-0.2225	-0.296594
YDR450W	RPS18A	-0.895094	-1.3398	0.370107	-0.945897	-0.181237	-0.347227	-0.905278	-0.722804	-0.734931	-1.53146
YDR451C	YHP1	-0.53126	0.407498	-0.0545104	0.618682	-0.129821	0.377445	-0.236034	-0.329976	-0.381388	0.132472
YDR452W	PPN1	0.367253	0.556913	-0.195134	-0.774178	-0.40834	-0.362378	0.165733	-0.00550518	0.537873	0.28553
YDR453C	TSA2	-0.181295	-1.64929	-0.163746	0.0708581	1.04454	0.375146	-0.466423	1.17086	-0.516495	-0.92046
YDR454C	GUK1	-1.03344	-1.29838	0.210674	-1.04166	-0.292097	-1.02679	-0.901526	-0.444665	-0.822085	-1.59601
YDR456W	NHX1	0.558275	0.58376	-0.135965	-0.626777	0.464201	-0.390583	0.432186	-0.126382	0.89876	-0.326004
YDR457W	TOM1	0.286395	0.0918336	0.269178	-0.302944	-0.419344	-0.227507	0.604681	-0.425652	0.61769	-0.445941
YDR458C	HEH2	0.444918	0.727548	-0.082233	0.0625516	0.079685	0.302361	0.922712	-0.0251356	0.537373	0.249954
YDR459C	PFA5	-0.427443	-0.25372	-0.0846002	-0.516716	-0.0310221	-0.434059	-0.430679	0.0360012	-0.395151	0.760755
YDR460W	TFB3	-0.437628	0.128078	0.00482066	0.50988	-0.131003	-0.0171614	-0.355174	0.201703	-0.351548	0.0918834
YDR461W	MFA1	-0.414372	-0.670982	0.0322244	0.35726	-1.91278	0.195033	0.371734	-0.411673	-0.148066	-1.74186
YDR462W	MRPL28	0.00711073	-0.0105919	0.38305	0.747609	1.05412	0.869285	-0.576527	0.239815	-0.680542	0.564127
YDR463W	STP1	0.541782	0.434482	-0.172802	0.45488	0.0389537	0.180743	0.104799	0.200265	0.433049	0.0225135
YDR464W	SPP41	-0.0989586	0.357537	-0.592283	-0.472545	-0.712642	-0.56189	-0.0846789	-0.588094	-0.174426	-0.870568
YDR465C	RMT2	-0.11083	-0.353164	0.104082	-1.00054	-0.731411	-0.8024	-0.0946283	-0.726562	-0.417952	-0.490112
YDR466W	PKH3	0.144491	0.447881	-0.59301	0.020013	-0.605266	-0.323197	0.15368	-0.468778	0.302274	0.191248
YDR468C	TLG1	-0.277491	-0.131394	-0.0267609	0.101663	0.24852	-0.157211	-0.495875	-0.193544	-0.382572	-0.273963
YDR469W	SDC1	-0.382388	-0.64898	0.154852	-0.514713	-0.00267318	-0.354287	-0.623756	-0.201021	-0.682291	-0.132602
YDR470C	UGO1	0.202898	0.14297	-0.0613917	-0.38766	0.38371	0.77692	-0.209414	-0.0919375	-0.154894	-0.20553
YDR471W	RPL27B	-0.980227	-1.11536	0.461205	-0.773795	-0.339763	-0.217244	-0.563226	-0.434688	-0.595644	-1.19997
YDR472W	TRS31	-0.434387	-0.797865	-0.065413	-0.8597	-0.79609	-0.430209	-0.313496	-0.275377	-0.330712	-0.505625
YDR473C	PRP3	0.266575	0.429706	-0.213506	0.356039	0.0599996	-0.250319	0.144729	0.0294828	0.169398	0.0882954
YDR475C	JIP4	0.289032	0.0467032	-0.317992	0.0966606	0.0663255	0.279918	-0.880877	-0.700023	0.12664	-0.529531
YDR476C	YDR476C	-0.183274	-0.922581	0.317137	-0.619621	0.976073	-0.00756641	-0.344908	0.964303	-0.344178	-0.190456
YDR477W	SNF1	0.554936	0.413401	-0.308195	0.17812	-0.227137	0.0285557	0.0906621	-0.581618	0.216578	-0.785377
YDR478W	SNM1	-0.0521007	-0.770733	-0.212245	-0.327717	-0.289897	-0.567657	-0.754534	-0.459775	-0.765582	-0.283333
YDR479C	PEX29	0.120938	0.306036	0.166081	0.854671	0.695163	0.321955	-0.0212313	0.122164	0.303041	0.450179
YDR480W	DIG2	-0.511297	-0.306836	-0.0214115	0.634704	0.0407158	-0.0974017	-0.369955	-0.23938	-0.30036	0.353164
YDR481C	PHO8	0.729956	0.700889	0.474076	-0.881412	-0.19024	0.231834	0.194909	-0.066764	0.494372	-0.100131
YDR482C	CWC21	-0.0414191	-0.65615	0.08525	-0.128042	0.153295	-0.00832683	-0.383449	0.133738	-0.888007	-0.356415
YDR483W	KRE2	0.166491	-0.00285328	-0.0255667	-0.681222	-0.0884028	-0.338904	0.0693305	0.0313145	0.0871772	-0.218645
YDR484W	VPS52	0.276715	0.273272	-0.0623628	0.811546	-0.194628	0.368797	-0.111915	0.0682256	0.0077211	0.106484
YDR485C	VPS72	0.470934	0.496608	-0.158765	0.0651351	-0.453609	-0.00103675	0.295929	-0.352871	0.197694	-0.894478
YDR486C	VPS60	-0.296925	-0.411215	0.0755012	0.197268	0.24053	-0.106604	-0.441663	-0.233816	-0.552975	-0.522555
YDR487C	RIB3	-0.475939	-0.622111	0.316607	-0.977643	0.474781	-0.862308	-0.475652	-0.0102699	-0.807557	-0.628119
YDR488C	PAC11	-0.190028	-0.112588	-0.116486	-0.724494	0.106368	-0.183378	-0.171762	0.391173	-0.317158	0.573262
YDR489W	SLD5	0.103744	0.194653	0.040314	0.441901	0.291017	0.677669	-0.316617	0.339991	-0.669714	0.644427
YDR490C	PKH1	0.259199	0.710462	0.208824	0.188269	0.0376412	0.187144	-0.0531133	0.71984	0.045288	0.544119
YDR492W	IZH1	0.111177	0.508209	-0.00509082	-0.610032	-0.472118	-0.204728	0.127769	-0.894352	0.349623	-0.455811
YDR493W	MZM1	-0.00368625	0.0357368	0.51408	0.515979	0.989047	0.865937	-0.338827	0.319422	-0.442443	0.16356
YDR494W	RSM28	0.0881043	-0.117323	0.286188	0.0359562	0.591921	1.04435	-0.363279	0.00132808	-0.244461	0.14143
YDR495C	VPS3	-0.246489	0.589558	0.294108	0.359689	0.233856	-0.44297	0.272502	-0.0983506	0.411528	-0.2107
YDR496C	PUF6	0.0389236	-0.200066	-0.0116874	-0.809137	-0.527636	-0.132238	-0.552687	-1.2069	-0.156502	-0.769358
YDR497C	ITR1	0.0997366	-0.184043	-0.387659	-0.687822	0.48022	-0.443576	-0.0642196	-0.82466	0.24671	-0.822158
YDR498C	SEC20	-0.127951	-0.671838	-0.0529405	0.100588	0.0683541	0.175937	-0.515608	-0.305637	-0.271039	0.0234911
YDR499W	LCD1	-0.012254	0.158982	0.0238417	-0.379636	0.118395	-0.416009	-0.133164	-0.191853	-0.0749168	0.633774
YDR500C	RPL37B	-1.37211	-1.21698	0.28718	-0.80083	-0.265467	-0.56994	-0.671182	-0.394779	-0.732201	-1.42648
YDR501W	PLM2	-0.400124	-0.146555	-0.339449	-0.24363	-0.501375	0.917077	-0.44653	-0.830374	-0.360049	-0.0730205
YDR502C	SAM2	-0.553579	-0.711747	-0.13815	-1.66992	0.0976825	-0.836345	-0.402172	-0.644068	-0.199463	-1.66998
YDR503C	LPP1	0.212343	-0.237341	-0.0979858	-0.384731	0.34317	0.482386	-0.513081	-0.04886	-0.176374	0.0486443
YDR504C	SPG3	0.507615	0.540368	-0.15843	-0.139657	-0.446093	-0.208512	0.681422	-0.627461	1.01119	-0.665158
YDR505C	PSP1	0.668534	0.906629	-0.295194	-0.342392	-0.918722	0.0416411	0.549287	-0.730372	0.862975	-1.0161
YDR506C	YDR506C	0.999987	0.898948	-0.463346	-0.674832	0.555357	-0.213024	-0.00744225	-0.76561	0.928217	-0.419434
YDR507C	GIN4	0.201214	0.335749	-0.27627	0.282908	-0.577563	0.202691	0.0128248	-0.578996	0.178174	-0.792437
YDR508C	GNP1	0.938373	0.789996	-0.298631	0.0396152	0.307772	0.0772342	0.694722	-0.452335	0.6736	0.0692966
YDR510W	SMT3	-0.461877	-0.895132	-0.0450285	-0.675358	0.369191	-0.786806	-1.09446	-0.161393	-0.855515	-1.3682
YDR511W	ACN9	0.14284	-0.360258	0.60787	-0.277468	1.27516	0.987062	-0.415466	0.696315	-0.627794	0.337248
YDR512C	EMI1	-0.29122	-0.0140675	0.435334	0.355545	-0.226153	0.0192534	-0.157206	0.126367	-0.281955	-0.856824
YDR513W	GRX2	-0.606503	-0.51036	0.255849	-0.70149	-0.0208251	0.119187	-0.621564	-0.322343	-0.594515	-1.20725
YDR514C	YDR514C	0.247194	-1.50075	0.014296	-0.246731	-0.26199	-0.164974	0.0606725	-0.239419	0.135199	-0.241183
YDR515W	SLF1	-0.206104	0.351107	0.269983	0.179423	-0.033269	-0.213536	-0.0920705	-0.0474682	0.0256732	0.596269
YDR516C	EMI2	1.11593	1.08453	0.485522	0.968927	0.519685	1.81689	-1.09221	0.829174	0.254388	0.0083803
YDR517W	GRH1	-0.0273244	-0.603527	0.169247	-0.182701	0.4533	-0.130381	-0.724261	0.280681	-0.355552	-0.466349
YDR518W	EUG1	0.63261	0.178503	-0.004097	-1.7077	0.171736	-0.895769	0.194375	-0.419923	0.603325	-0.79507
YDR519W	FPR2	-0.659399	-0.902041	0.148631	-0.945474	-0.00883143	-0.358912	-0.633096	0.192014	-0.728779	-0.581185
YDR520C	URC2	0.0418847	0.204497	-0.18519	-0.249976	-0.1688	-0.330037	0.143682	-0.388264	0.123985	-0.742874
YDR522C	SPS2	-0.673632	-0.69257	0.241544	-0.150988	-0.0520704	-0.287846	-0.502407	-0.0151092	-0.451703	-1.20916
YDR523C	SPS1	0.165831	-0.435547	0.35709	-0.191625	0.286449	0.0104343	1.237	0.50587	-0.254721	0.182858
YDR524C	AGE1	-0.315475	0.721172	-0.0221693	-0.693638	-0.69271	-0.777637	0.589221	0.160712	0.091061	-0.106797
YDR524C-B	YDR524C-B	-0.66232	-1.14137	0.449149	-0.82295	0.314512	-0.21815	-0.695371	-0.499084	-0.677287	-1.39481
YDR525W-A	SNA2	0.0492221	-0.0280173	-0.0671929	0.47287	0.136984	0.684723	-0.27791	0.512045	-0.295609	-0.331296
YDR527W	RBA50	-0.506874	-0.401626	-0.177788	-0.531277	-0.782282	-0.790596	-0.471808	-0.394831	-0.365729	-0.378964
YDR528W	HLR1	-0.332509	-0.155293	-0.734063	-0.965297	-0.0672089	-0.652487	-0.407924	-0.780195	-0.0594543	-1.56147
YDR529C	QCR7	0.17494	-0.507303	-0.0438884	-0.20748	0.376644	0.947189	-0.909354	-0.432579	-0.474516	-0.312124
YDR530C	APA2	-0.0195768	-0.771582	0.00508135	0.267704	0.148396	-0.110453	-0.524267	0.438051	-0.277204	1.51956
YDR531W	CAB1	-0.817647	-0.458485	0.223493	-0.481751	-0.0784425	-0.414047	-0.548556	-0.568529	-0.280983	-0.135784
YDR532C	KRE28	-0.206421	0.894346	0.236564	-0.0268806	-0.185208	0.250506	0.0823986	-0.192641	-0.101516	0.552381
YDR533C	HSP31	0.963157	-1.57404	0.09245	-0.264681	-0.124755	-0.0949828	0.334117	-0.308615	0.389567	-0.982257
YDR534C	FIT1	-1.79323	-1.8739	-0.29696	-0.914332	1.85071	-0.743734	1.22426	2.10345	-0.483476	-0.748444
YDR536W	STL1	-0.639973	-0.582265	0.41119	0.840918	0.608203	1.33806	-0.234319	-0.20334	-0.436714	-0.0544376
YDR538W	PAD1	-0.425815	-1.26867	0.0488489	-1.17176	-0.219388	-0.754702	-0.648003	-0.554687	-0.348881	-0.0395807
YDR539W	FDC1	-0.277569	-2.88269	0.374027	-1.10368	0.68148	0.137288	-0.752205	-0.280097	-0.0916917	-0.168302
YDR540C	IRC4	0.11895	-1.64424	0.531692	-1.27415	0.048078	-0.0628461	0.170366	0.710431	-0.266941	0.225136
YDR541C	YDR541C	-0.338665	-0.671082	0.459663	-0.708657	0.94423	0.298895	-0.218166	0.708523	-0.73442	1.18863
YEL076C-A	YEL076C-A	-0.274585	-1.21357	-0.388191	1.79828	-0.0694368	1.77662	2.45649	1.99102	-0.752231	-1.20123
YEL076C	YEL076C	-0.340497	-0.780583	0.16673	1.36159	0.0111789	0.376163	2.26659	0.852096	-0.407714	-1.32487
YEL075C	YEL075C	-0.697934	-1.04899	0.237079	-0.388017	0.0686	-0.467929	-0.360757	0.0516743	-0.596937	-1.22442
YEL073C	YEL073C	-0.546328	-0.672191	-0.147778	0.178884	1.6625	1.5894	-0.440083	1.4314	-0.6113	0.89402
YEL072W	RMD6	-0.109608	0.439662	0.153159	-1.80401	0.375888	-0.77595	0.395459	0.728815	-0.92403	1.5566
YEL071W	DLD3	-0.208098	0.104703	0.32983	-1.00316	0.343007	-0.524344	0.20972	0.401423	-0.047845	-0.289819
YEL070W	DSF1	-0.489123	-1.77341	0.209409	-0.802883	2.7027	1.38402	0.0342354	0.992559	-0.866917	0.271235
YEL069C	HXT13	-0.374102	-1.04226	0.237774	-0.317792	0.0865729	-0.522524	-0.526079	-0.0851915	-0.515083	-1.44672
YEL066W	HPA3	-0.362664	-1.59721	0.376877	0.255996	1.03088	-0.192761	-0.429478	0.60614	-0.337794	-0.366432
YEL065W	SIT1	1.34224	0.882454	0.392881	-0.176252	1.57463	-0.366665	0.385271	0.867383	0.760966	-0.822636
YEL064C	AVT2	-0.44516	-0.404391	-0.179112	-0.527518	0.583351	-0.145567	-0.386488	-0.293907	-0.117024	-0.0191212
YEL063C	CAN1	0.841506	1.24284	-0.23419	0.324096	-0.0379138	0.0976551	1.02274	-0.390282	0.620427	-0.0531049
YEL062W	NPR2	0.12184	0.373489	-0.0539247	0.71494	0.145514	0.13559	0.0957503	0.0717605	0.10219	0.36513
YEL061C	CIN8	-0.652119	0.756531	-0.415561	-0.590672	-0.883177	-0.342228	-0.63882	-1.03926	-0.242189	-0.534412
YEL060C	PRB1	0.705282	0.828766	-0.0839101	1.71086	0.60768	1.53833	0.407845	1.1927	0.531885	-0.514101
YEL059C-A	SOM1	0.0094833	-0.37083	1.13177	0.0823275	0.102923	1.16312	0.396614	1.50932	-0.351933	1.28049
YEL058W	PCM1	-0.0712811	-0.172137	0.224401	0.123015	-0.170524	0.342736	0.0621284	0.441327	0.0799735	-0.485927
YEL057C	YEL057C	-0.626386	-1.58582	0.0477291	-0.0929585	0.365666	0.381784	0.441019	0.997655	-0.419884	1.84632
YEL056W	HAT2	-0.0999306	-0.438364	0.18008	0.618278	0.0164803	-0.190972	-0.276794	-0.2285	-0.326954	-0.0748041
YEL055C	POL5	0.171638	-0.388322	-0.137126	-0.728573	-1.15956	-0.874012	-0.0547008	-0.907789	0.208633	-0.895901
YEL054C	RPL12A	-0.910956	-1.31574	0.422059	-0.914085	-0.321479	-0.274948	-0.776009	-0.390174	-0.676366	-1.29197
YEL053C	MAK10	-0.389025	-0.302647	-0.287821	-0.110812	0.0551713	0.0125557	0.146314	-0.207597	0.0127486	-0.380927
YEL052W	AFG1	-0.173327	-0.250745	-0.206718	-1.16059	-0.130395	-0.166409	-0.480704	-0.365882	-0.0355317	-0.238812
YEL051W	VMA8	-0.78236	-0.946319	0.0036411	-1.06605	0.103605	-0.857011	-0.502114	-0.133271	-0.580056	-1.05317
YEL050C	RML2	0.413149	-0.24474	0.162609	-0.520796	0.170814	0.685073	-0.257923	-0.0716201	-0.0238128	-0.447676
YEL049W	PAU2	-1.03855	-1.14277	0.0258969	2.279	1.92892	-0.353746	0.32515	1.82304	-0.575693	1.67876
YEL048C	TCA17	-0.804315	-1.29778	-0.127477	-0.396501	0.417985	-1.09626	-0.151375	0.333498	-0.831769	1.69476
YEL047C	YEL047C	-0.149467	-0.262477	-0.0852527	-0.887114	0.108564	-1.22498	-0.113888	0.191943	-0.497923	-0.876571
YEL046C	GLY1	0.0724127	-0.293928	-0.120619	-0.331407	-0.644088	-0.426454	0.107711	-0.240339	-0.00865878	-0.418409
YEL044W	IES6	0.0141646	-0.896785	0.33976	0.554182	0.310823	-0.443093	-0.00415808	0.482176	-0.409113	-0.312019
YEL043W	YEL043W	0.663937	0.895025	-0.233696	-0.529273	-0.737485	-0.851557	0.688988	-0.555203	0.775672	-0.291154
YEL042W	GDA1	0.596035	-0.0668564	-0.181111	-1.3207	-0.547174	-0.647086	0.360565	-0.736266	0.562029	-1.07384
YEL041W	YEF1	0.0191471	-0.117721	-0.0619662	0.375006	0.995356	1.08401	0.211434	0.0196108	0.0904824	0.906128
YEL040W	UTR2	0.649362	0.156467	-0.0513989	-1.52846	-0.474068	-1.00686	0.257644	-0.423029	-0.00649392	-0.624987
YEL039C	CYC7	2.17605	2.82814	0.635249	1.52301	1.47003	3.25483	0.740715	0.884032	0.473598	1.19221
YEL038W	UTR4	-0.209271	-0.636483	-0.204419	-1.18065	0.300268	-1.02903	-0.48394	-0.119468	-0.543534	-1.10176
YEL037C	RAD23	0.249961	-0.233245	0.0616891	-0.450485	-0.441995	-0.236121	-0.000112601	-0.140428	-0.0471217	-0.719511
YEL036C	ANP1	0.581862	0.538462	-0.255927	-0.613465	-0.683274	-0.0224543	0.366374	-0.742224	0.293232	-0.278836
YEL035C	UTR5	-0.571172	-1.06391	0.103017	-0.213629	0.384274	-0.347633	0.0377442	0.420408	-0.37378	-1.01671
YEL034W	HYP2	-0.674167	-1.06828	0.33203	-1.07191	-0.0448999	-0.444152	-0.441423	-0.490004	-0.393497	-1.17958
YEL032W	MCM3	0.0578484	-0.13216	-0.435697	-0.0360116	-0.910115	-0.0733533	0.256812	-0.594858	0.306873	-0.631335
YEL031W	SPF1	0.503545	0.239223	-0.283303	-1.02201	-0.230251	-0.974618	0.718856	-0.900777	0.683816	-0.929737
YEL030W	ECM10	-0.313671	-0.864793	0.160121	-1.24099	0.0588108	-0.188964	-0.30327	0.344291	-0.614164	1.1065
YEL029C	BUD16	-0.401385	-0.665493	0.0180238	-0.505262	0.21163	-0.481722	-0.427763	-0.54844	-0.381531	-0.0708813
YEL027W	VMA3	-0.48726	-1.05879	0.11203	-0.952195	-0.314787	-0.983677	-0.503452	-0.265816	-0.3241	-1.23487
YEL026W	SNU13	-0.644087	-1.1691	0.191933	-1.15075	-0.250254	-0.528112	-0.622702	-0.471992	-0.56745	-1.43793
YEL025C	YEL025C	0.19548	0.460174	-0.0030237	-0.825767	-0.0882377	-0.479239	0.201279	-0.0153786	0.24414	0.477459
YEL024W	RIP1	1.42	0.43416	-0.0364834	0.128068	0.0835601	2.13929	-0.693561	-0.77193	0.243269	0.0687967
YEL023C	YEL023C	-0.295229	0.143498	-0.356665	-0.686496	0.709015	-0.440851	0.480838	0.0298948	0.248102	1.43162
YEL022W	GEA2	-0.372395	-0.0342242	-0.144925	-0.429833	-0.658617	-0.762594	0.0872569	-0.605835	0.323987	-1.13119
YEL021W	URA3	-0.518641	-1.01301	0.513337	-0.367792	-0.104984	-0.609635	-0.445999	-0.0786734	-0.335976	-1.43123
YEL020W-A	TIM9	-0.40994	-1.13396	0.00566438	-0.28932	0.200389	0.1003	-0.751075	-0.273049	-0.867866	-0.64635
YEL020C	YEL020C	0.366166	0.108472	-0.0646505	0.601368	-0.0619435	-0.330655	-0.0377725	0.063261	0.233344	-0.142043
YEL019C	MMS21	0.049007	-0.450666	0.022511	-0.102079	-0.682758	-0.412822	-0.308724	-0.731473	-0.357046	-0.678003
YEL018W	EAF5	0.147294	-0.459961	-0.159435	-0.763695	-0.176745	-0.335627	-0.480635	-0.458187	-0.556664	-0.611923
YEL017W	GTT3	0.0293512	-0.197389	-0.211836	-0.148297	0.0901318	-0.102261	-0.549774	-0.400244	-0.216456	-0.839195
YEL017C-A	PMP2	-0.0855679	-0.470694	0.150083	-0.692854	-0.711615	-0.971157	0.21193	-0.442865	0.00988875	-0.933252
YEL016C	NPP2	-0.193412	0.302868	-0.127181	-1.04945	-0.610777	-0.914717	-0.0805495	-0.273564	0.234757	0.455037
YEL015W	EDC3	0.420194	0.23206	-0.373376	0.692734	-0.222742	-0.0666498	-0.0567157	-0.547962	0.129018	0.31069
YEL013W	VAC8	0.171722	0.113747	-0.265554	-0.294351	-0.205987	-0.109061	0.162061	-0.574897	0.154028	-0.88651
YEL012W	UBC8	-0.843954	0.413428	0.114182	1.26737	0.795319	0.297487	-0.322948	0.628952	-0.293798	-0.35048
YEL011W	GLC3	1.1193	1.70816	-0.676324	2.32246	1.98709	2.82844	-1.39087	0.0323329	0.499193	1.52024
YEL009C	GCN4	-0.00230155	-0.348825	0.237668	-0.317628	0.0606377	-0.353509	0.0552541	-0.285929	-0.136499	-0.518765
YEL007W	YEL007W	0.434183	0.280525	-0.312761	-0.164518	-0.597814	-0.0569039	0.19818	-0.930347	0.342572	-0.672407
YEL006W	YEA6	-0.407535	-0.604865	0.152531	-0.549204	0.188649	-0.816336	-0.304993	0.0215837	-0.195425	0.534757
YEL005C	VAB2	-0.248014	-0.511215	-0.023572	-0.0063044	0.770722	0.224575	-0.241526	0.00173877	-0.267155	0.544616
YEL004W	YEA4	0.0706766	-0.049414	-0.23174	-0.164197	0.37371	-0.032813	0.0542757	-0.313986	0.050878	1.31845
YEL003W	GIM4	-0.712076	-0.819371	0.0240581	-0.472318	0.232395	-1.12532	-0.475233	-0.239472	-0.737202	-0.66811
YEL002C	WBP1	0.440238	0.204246	-0.0663001	-0.759115	-0.287164	-0.572986	0.281038	-0.46923	0.536647	-0.910178
YEL001C	IRC22	-0.375499	-0.582968	0.08772	-0.690439	0.00900895	-0.749969	-0.101473	0.0246345	-0.29832	-1.26166
YER001W	MNN1	1.33132	1.17666	0.0939677	-0.320298	-1.19527	-0.335751	0.965952	-0.991606	1.03754	0.0265707
YER002W	NOP16	-0.337412	0.31579	-0.0622551	-0.406469	-0.558335	-0.384966	-0.0696671	-0.486689	-0.449463	-0.826464
YER003C	PMI40	-0.442327	-0.688293	-0.0213196	-0.85483	-0.319851	-0.713678	-0.630428	-0.643816	-0.241273	-1.34492
YER004W	FMP52	-0.00994481	0.0400948	0.355984	-0.280749	0.268048	-0.289186	-0.207144	0.167158	-0.311445	0.230445
YER005W	YND1	-0.470018	-0.364773	-0.292937	-0.886042	-0.0793481	-0.506024	-0.0813349	-0.476773	-0.220102	0.209036
YER006W	NUG1	0.0712145	-0.414386	0.191304	-0.540433	-0.421617	-0.472083	0.0459076	-0.596836	0.0461337	-1.28298
YER007C-A	TMA20	-0.816342	-0.77605	0.175916	-0.586234	0.244827	-0.537259	-0.454667	-0.186258	-0.565321	-0.997237
YER007W	PAC2	-0.471035	-0.624196	0.0490059	-1.24384	0.125741	-0.523253	-0.383049	0.0975282	-0.422897	0.0429273
YER008C	SEC3	0.426477	0.716383	-0.0255476	0.16477	-0.456098	-0.298224	0.664111	-0.0876994	0.611389	-0.504208
YER009W	NTF2	-0.664467	-1.13692	0.108744	-0.946821	0.0837442	-0.711971	-0.552879	-0.334352	-0.557562	-1.49192
YER010C	YER010C	-0.587899	-0.690589	0.0637535	-0.221838	0.530544	0.290619	-0.951643	-0.145506	-1.07778	-0.494505
YER011W	TIR1	-2.10765	-4.19323	-0.713572	-3.52414	0.87611	-2.95101	-1.18203	0.0432946	-1.87567	-2.98534
YER012W	PRE1	-0.407931	-0.395654	0.348318	-0.130749	0.183062	-0.00743789	-0.478913	-0.111747	-0.423877	-1.04207
YER013W	PRP22	-0.0390295	0.212137	-0.132483	0.525978	-0.368653	-0.136283	0.272443	-0.24554	0.132773	-0.793667
YER014C-A	BUD25	-0.454695	-0.507541	0.213671	-0.281789	0.0356797	-0.698691	0.0149643	0.0256543	-0.422177	-1.47232
YER014W	HEM14	0.515033	0.180541	0.0376906	-0.509308	0.377559	-0.434191	-0.144489	0.249664	-0.0924585	-1.05399
YER015W	FAA2	-0.103812	-0.694531	-0.420046	-0.486503	1.65725	-0.710598	0.210559	1.06389	-0.17705	0.674186
YER016W	BIM1	-0.300904	-0.382369	0.207555	0.243373	-0.0706097	-0.0214171	-0.634573	-0.674119	-0.701996	0.347463
YER017C	AFG3	0.341788	0.322817	0.187767	-0.571928	-0.0111188	0.0406009	0.33725	0.0305959	0.384834	0.269084
YER018C	SPC25	-0.102142	-0.686076	-0.0508413	0.689396	0.828874	0.0100852	-0.979617	-0.135235	-0.584948	0.0534899
YER019C-A	SBH2	-0.466649	-1.42604	0.18697	-0.866412	-0.225586	-0.726053	-1.00525	-0.0548849	-1.15557	-0.926517
YER019W	ISC1	-0.462947	-0.528538	0.0542403	-0.26847	0.120865	-0.180657	-0.234266	0.490955	-0.190851	-0.138634
YER020W	GPA2	0.180098	-0.26744	0.0395394	-0.172112	0.455955	0.198295	-0.472986	0.133879	-0.352405	0.899096
YER021W	RPN3	-0.142639	-0.0476616	-0.148256	0.16504	-0.0424428	-0.0580717	-0.286222	-0.0558569	-0.147295	-0.580675
YER023W	PRO3	-0.458754	-0.996505	0.27075	-0.89744	0.108085	-0.822898	-0.403628	-0.196378	-0.247355	-1.26792
YER024W	YAT2	0.798478	0.598442	-0.0582341	0.684315	0.848131	-0.0692044	0.743386	0.6751	0.306466	1.92605
YER025W	GCD11	0.116781	-0.388021	-0.29929	-0.83228	-0.37044	-0.49345	-0.0473103	-0.471878	-0.0828575	-1.20683
YER026C	CHO1	0.138147	0.0506124	0.0165179	-0.453383	0.804403	-0.341031	-0.376609	-0.0726587	-0.211895	-0.686186
YER027C	GAL83	-0.341573	-0.440682	-0.0813804	-0.311702	0.108933	-0.337738	-0.535645	-0.180689	-0.42249	-0.829218
YER028C	MIG3	0.385102	-1.41542	0.61064	0.682953	0.537534	-1.17002	0.64121	0.845394	-0.182145	0.640024
YER029C	SMB1	0.341427	-0.254321	-0.488122	-0.0670821	0.194392	0.0526757	-0.417281	-0.383744	-0.523554	-0.0455147
YER030W	CHZ1	-0.414221	-0.538382	0.143742	-0.404661	-0.0575196	-0.384485	-0.508032	0.0596956	-0.551162	-0.994277
YER031C	YPT31	-0.588022	-0.628795	-0.0983983	-0.613928	-0.0363319	-0.804604	-0.773675	-0.243009	-0.588432	-1.17163
YER032W	FIR1	-0.213729	0.620776	-0.253749	-0.0762144	-0.723702	-0.221157	-0.341493	-0.455349	0.0469682	0.539291
YER033C	ZRG8	1.72103	1.04771	0.107667	0.645011	0.062566	0.582339	0.930633	0.625196	1.13691	0.544592
YER034W	YER034W	0.261367	-0.181159	0.212841	0.555064	0.519629	0.349782	0.0409591	0.0988874	-0.00866258	0.243662
YER035W	EDC2	-0.051261	-0.15035	0.12911	1.51806	0.221225	0.411648	-0.422491	0.627822	-0.447109	0.206971
YER036C	ARB1	-0.280696	-0.888038	-0.29611	-1.27225	-0.764986	-0.683557	-0.239237	-0.828737	-0.161603	-1.42074
YER037W	PHM8	3.40622	2.99431	1.90141	3.62075	1.95228	2.44691	0.629952	2.64604	1.33192	1.78827
YER038C	KRE29	0.86236	0.0614617	0.0514232	-0.29271	0.135176	-0.0560009	0.0233778	0.0590077	0.402446	0.533032
YER039C	HVG1	-0.508488	-0.298633	-0.488903	-0.0966587	0.852183	-0.770432	-0.832477	-0.191291	-0.0813778	0.823627
YER039C-A	YER039C-A	-0.651513	-0.497434	-0.115313	0.187894	0.732163	-0.60935	-0.234389	0.640595	-0.266407	1.19552
YER040W	GLN3	0.0131689	0.6997	0.097149	0.080501	-0.884162	0.209321	0.585765	0.0778224	0.482803	0.286279
YER041W	YEN1	-0.151267	-0.313264	-0.161089	-0.182805	0.392993	-0.159891	-0.117258	0.353003	-0.198122	1.09142
YER042W	MXR1	-1.38432	-0.980147	0.200903	-0.903083	-0.233251	-0.794628	-0.544409	-0.382039	-0.603653	-1.90568
YER043C	SAH1	-0.317763	-0.9038	0.158176	-1.17127	-0.112029	-0.556585	-0.395455	-0.468314	-0.2542	-1.23762
YER044C	ERG28	0.0739433	-0.496147	0.0847278	-2.02516	0.210994	-2.12342	0.234314	1.20007	-0.445241	-1.1483
YER044C-A	MEI4	-0.454974	-1.32197	-0.146369	-0.672142	-0.18471	-0.29472	0.78146	1.26516	-0.521664	1.44979
YER045C	ACA1	-0.170158	-0.0763288	0.541025	1.01246	0.512957	0.38341	1.10322	1.47913	-0.401554	1.07539
YER046W	SPO73	-0.717845	-0.715993	-0.37656	-0.482481	0.866157	-0.408776	-0.141365	1.10253	-0.781671	0.394257
YER047C	SAP1	0.286693	0.102256	-0.359534	0.0496133	0.120107	-0.11539	-0.056326	-0.653106	0.233118	0.00146583
YER048C	CAJ1	0.145348	-0.495238	-0.159852	-0.694073	-0.233395	-0.64202	-0.446518	-0.485544	-0.0856876	-1.19136
YER048W-A	ISD11	-1.00918	-0.581222	0.0962451	-0.148331	0.200384	-0.207788	-0.65943	0.309198	-1.04093	0.124989
YER049W	TPA1	0.0481059	-0.406039	-0.348926	-0.942646	-0.667068	-0.860415	0.170152	-0.888509	0.209642	-1.71949
YER050C	RSM18	-0.390873	0.310025	0.170544	0.286614	0.594262	0.608182	-0.283804	-0.247978	-0.402318	-0.372626
YER051W	JHD1	-0.441048	0.0586238	0.0625094	-0.334601	0.150339	-0.0432783	0.0399495	0.268585	-0.133616	0.121301
YER052C	HOM3	-0.118856	-0.379645	0.0772631	-0.810545	-0.877765	-0.864923	-0.107119	0.271036	-0.130487	-0.618337
YER053C	PIC2	0.783081	0.824529	0.29333	1.58892	1.03459	2.44618	-0.240439	1.00438	0.424515	1.27531
YER053C-A	YER053C-A	4.58289	1.7895	0.583789	4.13832	0.188104	3.49173	0.695435	0.448021	1.63987	1.38675
YER054C	GIP2	0.0109597	0.99593	0.356696	0.194609	0.658334	1.00971	0.559174	0.129363	-0.00219835	-0.148205
YER055C	HIS1	-0.510127	-0.9132	-0.00244392	-0.870025	-0.374583	-0.553762	-0.517673	-0.254205	-0.622331	-0.798215
YER056C	FCY2	0.578234	0.23285	0.0356228	-0.438007	-0.794449	-0.276734	0.532453	-0.589597	0.536839	-0.612166
YER056C-A	RPL34A	-1.11702	-1.2997	0.379758	-0.748504	-0.378749	-0.332193	-0.718239	-0.343017	-0.717477	-1.38957
YER057C	HMF1	-0.653402	-1.14384	0.265604	-0.353305	0.117092	-0.520417	-1.21967	-0.253774	-0.598971	-0.963096
YER058W	PET117	-0.845802	-0.411174	0.243815	-0.344953	1.55095	0.966564	-1.17138	0.507896	-0.593931	-0.479189
YER059W	PCL6	-0.140576	0.229391	-0.0941464	0.801156	-0.147961	0.0925949	-0.478106	-0.463341	-0.232188	0.409363
YER060W	FCY21	0.216476	-1.1305	-0.501509	-1.48117	-0.46345	-0.722304	-0.110971	-0.146984	0.090714	-2.85465
YER060W-A	FCY22	-0.814747	-0.777413	-0.939325	0.435339	1.31819	0.979968	-0.120599	-0.780539	-0.242023	-2.59268
YER061C	CEM1	-0.307162	-0.918164	0.261244	0.119833	-0.434466	-0.0762748	-0.231104	-0.010621	-0.363368	0.547995
YER062C	HOR2	1.85133	0.982612	1.24064	1.11348	0.941159	1.31099	-0.17654	1.06685	0.75892	0.122508
YER063W	THO1	-0.318818	-1.53546	0.0248614	-0.723463	0.166808	-0.28964	-1.09166	-0.345806	-0.596903	-0.677892
YER064C	YER064C	0.251493	0.229789	0.119818	-0.0279501	-0.318687	0.409123	0.0876925	-0.0686557	-0.0710974	-0.173382
YER065C	ICL1	-0.0268122	-0.268897	-0.307978	-0.0567031	0.442666	-0.346972	-0.185018	-0.157001	0.0601303	-0.103769
YER066W	RRT13	-0.14257	-0.0793598	0.296643	-0.3356	0.659639	-0.442484	0.496609	0.596466	0.0503198	1.57882
YER067W	RGI1	2.02692	1.59644	0.707863	2.32646	1.205	3.45228	-0.816077	0.808123	0.0950496	1.75385
YER068W	MOT2	0.118803	0.135641	-0.0557218	-5.48147	-0.582575	0.359355	-0.124466	-0.352445	0.0384762	-0.0485063
YER069W	ARG5,6	-0.989881	0.0425347	-0.201977	0.700836	-1.27043	-1.08053	0.642313	0.796732	0.562553	0.97949
YER070W	RNR1	0.235983	0.0610548	-0.325396	-0.210442	-0.671173	0.531792	0.191179	-1.01789	0.529293	-1.08189
YER071C	YER071C	-0.517306	-1.05789	0.626977	0.755746	0.629347	0.9637	0.113262	1.02265	-0.453539	0.538546
YER072W	VTC1	-0.394651	-0.755306	0.611189	-0.704518	0.238238	-0.115819	-0.352285	-0.118662	-0.211108	-0.987811
YER073W	ALD5	-0.826141	-0.533514	-0.245009	-1.03218	-1.54275	-0.76051	-0.676976	-0.288229	-0.47933	0.0462841
YER074W	RPS24A	-0.961514	-1.34234	0.297581	-0.852435	-0.198317	-0.425487	-0.639372	-0.417034	-0.553287	-1.46854
YER074W-A	YOS1	-0.767638	-0.635842	-0.0805061	-0.471385	0.193197	-0.761912	-0.71367	0.18098	-0.789563	-0.882572
YER075C	PTP3	-0.248495	0.335058	-0.1411	0.0373994	-1.19275	-0.568252	0.320587	0.0188865	-0.0657079	-0.705335
YER076C	YER076C	-0.077434	-0.385767	-0.19476	-0.67071	0.444321	-0.501677	-0.13255	0.238678	-0.275384	1.38907
YER077C	YER077C	0.193574	0.135037	0.105697	0.0790982	0.0535821	0.269875	0.578682	0.248019	0.190426	2.22302
YER078C	ICP55	-0.108779	0.190425	-0.195367	-0.758207	-0.468683	-0.365468	-0.113965	-0.063665	-0.265509	-0.321899
YER078W-A	YER078W-A	-0.42723	-0.612003	0.38753	-0.0563952	0.0532866	-0.312288	0.970396	1.32414	-0.0054156	0.361445
YER079W	YER079W	0.392412	0.944656	0.306505	1.92296	1.39518	1.57969	-1.45604	0.200345	-0.470057	0.949875
YER080W	AIM9	0.30809	0.0900544	-0.0617908	-0.508578	-0.2517	-0.114482	-0.154816	-0.394532	0.19238	-1.49501
YER081W	SER3	-1.39454	-0.677047	-0.266549	0.581995	0.34529	-0.957953	0.556919	1.77127	-0.612027	0.960965
YER082C	UTP7	0.0215496	0.047925	-0.0598419	-0.0130564	-0.791484	-0.0332705	0.171216	-0.545056	-0.128875	-0.521878
YER083C	GET2	0.129928	-0.120226	0.0930948	-0.373319	0.266688	-0.210279	-0.211014	-0.154028	-0.174151	-0.88805
YER085C	YER085C	-0.71113	-0.893957	0.119258	-0.11403	-0.0442567	-0.369889	-0.20244	0.0862322	-0.530273	-0.543046
YER086W	ILV1	-0.0197243	-0.324164	-0.0506067	-0.984034	0.112108	-0.772596	0.113506	-0.0875401	0.00767433	-1.15239
YER087C-B	SBH1	-0.433066	-1.00439	-0.0152165	-0.961128	-0.164599	-0.917069	-0.52004	-0.243651	-0.397845	-1.20554
YER087W	AIM10	0.309823	0.159094	-0.0811343	-0.196417	0.34219	0.591493	0.190896	-0.0658057	0.371724	-0.562466
YER088C	DOT6	0.667312	0.0427795	-0.392657	-0.274479	-0.506587	0.246176	-0.397177	-0.821581	0.248667	0.30135
YER089C	PTC2	0.146584	-0.151353	0.264544	-0.109503	-0.145608	0.169906	-0.300961	-0.0886818	-0.213175	-0.484709
YER090W	TRP2	-0.116307	-0.254184	-0.0426856	-0.65552	-0.423871	-0.946314	0.0463	-0.10895	0.0620826	-0.780155
YER091C	MET6	-0.617167	-0.649962	-0.179439	-1.03208	-1.60256	-0.395191	0.698458	-0.79749	0.851232	-2.04628
YER092W	IES5	-0.187327	-0.0685565	0.240557	0.844088	0.393815	-0.129129	-0.564154	0.242176	-0.357914	0.870768
YER093C	TSC11	0.25001	0.1309	-0.114247	-0.192261	-0.250384	-0.311394	0.330872	0.0343843	0.239382	-0.427896
YER093C-A	AIM11	-0.0629749	-0.412205	0.475751	-0.773794	0.699385	0.991549	-0.381835	0.375746	-0.530099	0.0570221
YER094C	PUP3	-0.231093	-0.567656	0.0525846	-0.17849	0.60353	-0.0238294	-0.395634	0.103706	-0.519487	-0.73054
YER095W	RAD51	0.242874	-0.0328142	0.176428	0.00455723	-0.326095	1.64738	-0.450881	0.159979	-0.0193106	0.429298
YER096W	SHC1	1.13334	0.644366	0.00346637	0.458754	-0.095619	0.539287	0.91399	-0.128986	0.254836	1.30347
YER098W	UBP9	0.974573	0.993874	0.158265	0.48472	0.42564	0.689528	0.633533	-0.035361	0.695771	0.827679
YER099C	PRS2	-0.331983	-0.147249	0.0374729	-0.0894091	-0.0657538	-0.496515	-0.0752796	-0.282713	-0.337193	-0.208879
YER100W	UBC6	-0.270488	-0.142076	0.138808	0.234727	-0.139543	-0.160234	-0.122652	0.0542212	-0.269689	-0.649282
YER101C	AST2	0.000418411	0.0849952	-0.298299	0.61907	0.437694	0.649193	-0.367153	-0.212968	-0.0429507	0.675969
YER102W	RPS8B	-1.40769	-1.44514	-0.0142063	-0.978203	-0.567456	-0.580987	-0.901751	-0.508538	-0.813142	-1.40079
YER103W	SSA4	-1.06761	-0.949241	-0.505921	1.15939	-0.078098	0.59468	0.34766	-0.504809	0.317019	-0.206397
YER104W	RTT105	-0.154301	-0.244299	-0.0993317	-0.181783	0.643232	-0.129862	-0.632774	-0.549747	-0.304415	1.04364
YER105C	NUP157	0.189644	0.409815	-0.0357092	-0.497179	-0.44734	-0.319322	0.584871	-0.63168	0.580166	-0.731275
YER106W	MAM1	-0.471251	-0.629485	-0.0424873	-0.34932	0.9569	0.676883	0.345359	0.175701	-0.340271	0.299709
YER107C	GLE2	-0.0740442	-0.268402	0.0227091	-0.675797	0.155876	-0.0348855	-0.36787	-0.133153	-0.533246	0.0731154
YER109C	FLO8	-0.0931808	0.836988	-0.315163	-0.230483	-0.00453142	-0.809907	0.258337	-0.871709	0.351129	0.255923
YER110C	KAP123	0.193708	-0.358043	-0.209052	-1.40131	-1.06604	-0.85216	0.611071	-1.18835	0.441073	-1.30083
YER111C	SWI4	0.386553	0.90682	0.0437347	1.20883	0.239868	0.475654	0.636196	-0.236981	0.670956	0.219066
YER112W	LSM4	-0.299343	-0.0506868	0.0794322	0.129135	-0.251578	-0.207898	-0.335111	-0.36705	-0.56137	-0.576483
YER113C	TMN3	0.112909	0.374087	-0.629608	-0.855748	-0.523156	-0.559504	0.387664	-0.259819	0.355361	-1.01413
YER114C	BOI2	0.455462	0.00154909	-0.048513	-0.44577	-0.679156	-0.512438	0.246024	-0.604742	0.237481	-1.02792
YER115C	SPR6	-0.123612	-1.56314	0.328818	-1.98901	-0.357323	-0.888129	-0.488444	-0.115027	-0.432071	0.631797
YER116C	SLX8	-0.0339727	-0.500669	0.29198	-0.0374011	0.609734	-0.0320409	-0.0308203	0.185127	-0.259786	1.5396
YER117W	RPL23B	-0.807314	-1.35891	0.21779	-0.993077	-0.507541	-0.872074	-0.671203	-0.348897	-0.682906	-1.52744
YER118C	SHO1	0.644896	0.226478	0.235078	-0.964066	-1.02295	-0.165791	0.281771	-0.254543	0.250525	0.235101
YER119C	AVT6	0.314488	0.416592	0.0484562	-0.143453	0.720918	-0.231793	-0.00224721	0.560517	0.425102	-0.849307
YER120W	SCS2	-0.558831	-0.783781	0.0906685	-0.781756	-0.0228364	-0.673407	-0.726087	-0.440276	-0.523424	-1.4401
YER122C	GLO3	-0.2318	-0.317546	0.161562	0.0284418	-0.0772148	-0.0563811	-0.324049	-0.162195	-0.200215	-0.260857
YER123W	YCK3	-0.118008	0.550118	1.57614e-05	0.114682	-0.467711	0.269942	0.474282	-0.303397	0.117906	-0.157624
YER124C	DSE1	0.63111	0.136609	-0.18483	2.03441	-0.0626995	0.65638	0.479397	-0.0748361	0.581372	0.777011
YER125W	RSP5	0.188803	0.298662	0.0731265	-0.426273	-0.903762	0.00408345	0.360413	-0.740587	0.49085	-0.592796
YER126C	NSA2	-0.0515327	-0.742292	0.128624	-0.522628	-0.327495	-0.436142	-0.4412	-0.492897	-0.538514	-0.534074
YER127W	LCP5	0.0940022	-0.200815	-0.336817	0.0050356	-0.635027	-0.185969	0.0541458	-0.440682	-0.390505	-0.0960682
YER128W	YER128W	-0.603419	-0.124425	0.1557	0.306934	0.314929	-0.233222	-0.373629	0.441511	-0.598668	-0.26156
YER129W	SAK1	0.298998	0.863987	-0.105421	-0.226135	-0.267738	-0.578715	0.647985	-0.0227127	0.304943	-0.180836
YER130C	YER130C	-0.253524	-0.444684	-0.165931	0.373987	0.376687	0.0981366	0.193968	0.600861	-0.274234	0.67535
YER131W	RPS26B	-1.50666	-1.49508	0.376116	-0.845074	-0.325073	-0.332508	-0.929585	-0.493762	-0.737614	-1.36875
YER132C	PMD1	0.145693	-0.126236	-0.146649	-0.475343	-1.4144	-0.440118	0.841402	0.163337	0.531128	-0.837016
YER133W	GLC7	-0.0778183	-0.308722	-0.0538272	-0.539281	-0.15562	-0.215113	-0.139869	-0.244241	-0.254012	-0.734755
YER134C	YER134C	-0.424026	-0.308053	0.0698628	0.0562054	0.306917	0.00862456	-0.770601	0.0958893	-0.860459	0.0849895
YER136W	GDI1	-0.0416945	-0.0203014	-0.0057677	-0.0954058	-0.191274	-0.498431	0.0152703	0.0149229	0.0388693	-0.339147
YER137C	YER137C	-0.1373	-0.306597	0.310216	-0.0865489	0.387163	0.207772	0.459613	0.347511	-0.373414	0.849976
YER138W-A	YER138W-A	-1.27156	-0.640454	0.518153	-0.503263	-0.90341	-0.434325	-0.219403	-0.178334	-0.299712	-1.08148
YER139C	RTR1	-0.378885	-0.149988	0.0231561	0.510043	0.266203	-0.0742639	-0.352412	0.248622	-0.390777	1.45676
YER140W	YER140W	0.0405363	-0.3341	-0.160331	-0.373394	-0.00284461	0.0206012	-0.0270333	-0.397308	-0.0432745	-0.143882
YER141W	COX15	0.347575	0.178061	0.0781995	-0.0690025	0.413553	0.445458	-0.165648	-0.273966	0.257749	-0.294142
YER142C	MAG1	-0.232383	-0.0736275	0.592695	-0.574069	0.436467	-0.362289	0.443087	0.942908	0.0828235	0.652896
YER143W	DDI1	-0.12098	0.297673	0.251554	1.47761	-0.351954	0.250906	0.0976958	0.0980037	-0.258261	0.172711
YER144C	UBP5	-0.0489605	0.509747	0.422451	0.711626	0.0779742	0.975518	0.531839	0.413409	0.352204	-0.0294628
YER145C	FTR1	0.163846	-0.328824	-0.446316	-1.0772	0.683041	-0.708709	-0.585779	-0.11292	-0.118925	-1.27377
YER146W	LSM5	-0.790378	-1.51864	-0.043303	-1.22667	0.250101	-0.69956	-1.30877	-0.445321	-1.10591	-1.03682
YER147C	SCC4	-0.0115767	-0.360567	-0.123979	-0.586281	0.274017	-0.409597	-0.390101	-0.090923	-0.253619	0.818883
YER148W	SPT15	-0.575691	-0.980502	-0.125774	-1.36759	-0.65344	-1.04494	-0.584528	-0.466397	-0.628811	-1.07111
YER149C	PEA2	-0.310706	-0.424589	0.0688991	-0.668952	-0.0634157	-0.0564241	-0.245163	-0.234947	-0.243334	-0.744181
YER150W	SPI1	1.23585	1.32625	-0.0592089	1.79204	0.145506	0.560994	0.771975	1.28489	-0.321465	1.47502
YER151C	UBP3	0.0378157	0.401874	-0.0217217	-0.313641	-0.616696	-0.417983	0.545351	-0.767054	0.478309	-1.06368
YER152C	YER152C	-0.216032	-0.660188	0.154013	0.0770021	-0.314055	-0.0349277	-0.710252	0.490665	-0.38703	-0.303877
YER153C	PET122	0.0433693	-0.779042	-0.642622	-0.167421	-0.134267	0.363604	-0.243874	-0.216605	-0.871479	-0.778652
YER154W	OXA1	0.126861	-0.304286	0.0413948	-0.0314275	0.036907	-0.0612669	-0.427913	-0.109478	-0.115279	-0.638111
YER155C	BEM2	0.215573	0.0034232	-0.024405	-0.334935	-0.814083	-0.721619	0.389282	-0.38489	0.563047	-0.56986
YER156C	YER156C	0.0747634	-0.78374	-0.40601	-0.987182	-0.509695	-0.308344	-0.726022	-1.31044	-0.365191	-1.19734
YER157W	COG3	-0.0400835	-0.382679	-0.112917	-0.241733	-0.421394	-0.0485063	0.0318834	-0.389051	0.153972	-0.555995
YER158C	YER158C	0.993653	0.918406	0.251141	0.483078	0.681651	1.3314	0.92698	1.05722	0.797302	0.702903
YER159C	BUR6	-0.367161	0.386946	0.592463	0.290394	0.635436	-0.176143	-0.0965435	0.120245	-0.482671	0.294931
YER161C	SPT2	0.118884	0.151803	0.272192	0.0625055	-0.497306	0.327489	0.0700996	0.119291	-0.168635	0.506846
YER162C	RAD4	0.636145	0.753639	-0.0107452	0.658935	-0.179488	0.344619	0.554561	-0.0302663	0.45592	0.506312
YER163C	YER163C	-0.460352	-1.22599	0.196562	-0.160377	0.507933	-0.614055	-0.636999	0.937044	-0.803712	-0.0333067
YER164W	CHD1	0.848959	0.0824322	0.123321	0.347525	-0.0770108	-0.183024	0.282904	-0.424769	0.812825	-0.797596
YER165W	PAB1	0.0241234	-0.772302	-0.107284	-0.9716	-0.484365	-0.361011	-0.0852089	-0.628524	-0.0285888	-1.50136
YER166W	DNF1	0.896392	0.834433	0.0170079	-0.671377	-0.590135	-0.747993	0.68202	-0.557148	0.936564	-0.195304
YER167W	BCK2	-0.109223	-0.208181	0.192431	0.0901314	-0.541883	-0.13595	-0.0372845	0.0414855	0.0300709	0.517186
YER168C	CCA1	0.0304555	0.0251726	-0.0244026	0.328447	0.205057	0.285394	0.0945615	0.17877	-0.133012	0.151501
YER169W	RPH1	-0.0271405	0.244549	0.0137749	-0.177795	-0.865816	-0.424707	0.213794	-0.485974	0.16326	-0.795478
YER170W	ADK2	-0.184606	-0.151577	0.227482	0.496362	1.15471	0.819298	-0.548753	-0.222138	-0.318985	0.820097
YER171W	RAD3	-0.181684	0.161879	-0.335188	-0.261422	-0.144391	-0.392292	0.386682	-0.0968016	0.136779	-0.139025
YER172C	BRR2	0.118871	0.305606	-0.441981	-0.274955	-0.596884	-0.265431	0.566258	-0.590467	0.312533	-0.676128
YER173W	RAD24	-0.620932	0.0309792	-0.313845	-0.247577	0.425431	-0.608592	-0.232552	0.0488222	-0.399218	0.462649
YER174C	GRX4	-0.462799	-0.568862	-0.0110165	-0.935582	-0.298002	-0.15499	-1.40651	-2.2027	-0.292658	-0.42376
[truncated: 4,034 more rows]
